# Supplementary material
Source: PubMed Central journal article supplement (PMC2855883)

## Supplementary Information

### (Supplementary Methods and Results)

# Multi-site Assessment of Precision and Reproducibility of Multiple Reaction Monitoring-based Measurements of Proteins in Plasma

**T. Addona et al.**

#### **TABLE of CONTENTS:**

*(Page numbers in green boxes provide hyperlinks to the appropriate section)*

#### **Supplementary Methods:**

**Pg. 1 – 37**

Standard Operating Procedure (SOP) for NCI CPTAC Consortium-Wide Multiple Reaction Monitoring (MRM) Experiment

#### **Supplementary Tables 1 A-E:**

**Pg. 38 – 45**

#### **Mass Spectrometric and HPLC Parameters**

Supplementary Table 1 A: Overview of Experimental Metadata for Studies I, II, and IIIa-c from all eight CPTAC sites including seven 4000 QTRAPs and one TSQ Quantum Ultra.

Chromatographic and Mass Spectrometric Details

Supplementary Table 1 B: Overview of MRM Transitions from all eight CPTAC sites including seven 4000 QTRAPs and one TSQ Quantum Ultra, and Lists of specific Instrument Parameters: Declustering Potential (DP), Collision Energy (CE), and Collision Cell Exit Potential (CXP).

Supplementary Table 1 C: Comparisons of specific Instrument Parameter Declustering Potential (DP) for all MRM Transitions from seven CPTAC sites with 4000 QTRAP instruments.

Supplementary Table 1 D: Comparisons of specific Instrument Collision Energy (CE) for all MRM Transitions from seven CPTAC sites with 4000 QTRAP instruments.

Supplementary Table 1 E: Comparisons of specific Instrument Parameter Collision Cell Exit Potential (CXP) for all MRM Transitions from seven CPTAC sites with 4000 QTRAP instruments.

#### **Supplementary Figure 1**

**Pg. 46 – 56**

Measured concentration in fmol/ $\mu$ L on log scale across sites and studies I, II, and III for the entire range (1-500 fmol/ $\mu$ L) of spiked in analytes.

**Supplementary Table 2:** Pg. 57 – 65

**Summary of inter-lab and intra-lab CVs for all peptides calculated across the concentration range of spiked analyte – Studies I, II and III.**

Supplementary Table 2A: Study I Pg. 57 – 59

Supplementary Table 2B: Study II Pg. 60 – 62

Supplementary Table 2C: Study III Pg. 63 – 65

**Supplementary Figure 2:** Pg. 66 – 76

Intra- and inter-lab variation of assay CV (coefficient of variation) across studies I, II and III, for the entire range (1-500 fmol/μl) of spike in concentrations of the (light) analyte.

**Supplementary Figure 3:** Pg. 77 – 87

Intra- and inter-lab variation of assay CV (coefficient of variation) across studies IIIa, IIIb and IIIc, for the entire range (1-500 fmol/μl) of spike in concentrations of the (light) analyte.

**Supplementary Figure 4:** Pg. 88 – 89

Box plot of LOD values for each peptide for Studies I and II.

**Supplementary Table 3:** Pg. 90 – 91

LOD and LOQ values calculated for each peptide at each site. The MRM transition used for each calculation is shown, along with its fragment ion type.

**Supplementary Table 4 A-E:** Pg. 92 – 101

Linear regression-derived parameters: slope, CV(slope), and mean(slope) for Studies I, II, III a-c [for all ten peptides from all participating eight sites].

**Supplementary Figure 5:** Pg. 102 – 152

Linear calibration curves of observed concentrations (y-axis) of the ten signature peptides and the theoretical/spiked-in concentration (x-axis) into solution (buffer or plasma matrix).

**Supplementary Figure 6:** Pg. 153 – 154

Inter-lab reproducibility of linear calibration curve slopes and percent recovery representation for Study I, II, and IIIa-c.

**Supplementary Table 5:****Pg. 155 – 157**

% Recovery at individual concentration points (representative examples), [examples for peptide APR-AGL at sites 52 and 56 for Studies I, II, and IIIa-c; including graphics for site 52 and 56].

**Supplementary Tables 6 A-F:****Pg. 158 – 161****Gravimetric Corrections for Sample Concentrations.**

Supplementary Table 6 A: Concentrations of the isotopically-labeled ( $^{13}\text{C}/^{15}\text{N}$ ) internal standard peptides spiked into Study I samples

Supplementary Table 6 B: Concentrations of the unlabeled signature peptides spiked into Study I samples

Supplementary Table 6 C: Concentrations of the isotopically-labeled ( $^{13}\text{C}/^{15}\text{N}$ ) internal standard peptides spiked into Study II samples

Supplementary Table 6 D: Concentrations of the digested proteins spiked into Study II samples

Supplementary Table 6 E: Concentrations of the isotopically-labeled ( $^{13}\text{C}/^{15}\text{N}$ ) internal standard peptides in the IS peptide mixture distributed with Study III samples

Supplementary Table 6 F: Concentrations of the proteins spiked into Study III samples

**Supplementary Appendix:****Pg. 162 – 212**

Logarithmic dilution curves of observed concentrations (y-axis, log scale) of the ten signature peptides and the theoretical/spiked-in concentration (x-axis, log scale) into solution (buffer or plasma matrix).

## **Supplementary Methods: SOP for NCI CPTAC Consortium-Wide Multiple Reaction Monitoring (MRM) Experiment**

### **Experimental Design and Statistics Verification Studies Working Group**

**Aims:** The study described in this SOP is designed to accomplish the following three aims:

1. To assess transferability, reproducibility and analytical performance of MRM-based assays across CPTAC sites for the purpose of quantifying target proteins in human plasma.
2. To generate a data set for the WG statisticians to define and refine metrics of LOD, LOQ, accuracy, and precision for an MRM-based assay designed to quantify target proteins in human plasma.
3. To deliver to the proteomics community a set of reagents and protocols for MRM-based assays for the quantitation of target proteins in plasma.

**Background:** This study is designed to satisfy the objectives stated above. In order to isolate variability in the quantitative measurements introduced by sample preparation and instrumental analysis, a 3-part study is outlined below. Each part will entail monitoring signature peptides derived from seven target proteins (SOP Table A) that will be quantitatively assayed by LC-MRM/MS against a background of human K<sub>2</sub>EDTA plasma. All experiments will consist of a 9-point standard curve ranging in concentration from 500 to 1 fmol/μL. In addition, synthetic signature internal standard (IS) peptides uniformly labeled with a <sup>13</sup>C/<sup>15</sup>N amino acid at their C-terminus will be spiked into all plasma samples at a constant concentration of 50 fmol/μL.

#### **Study I: Addition of [<sup>12</sup>C/<sup>14</sup>N] and [<sup>13</sup>C/<sup>15</sup>N] synthetic peptides into diluted, digested human plasma.**

In Study I, synthetic [<sup>12</sup>C/<sup>14</sup>N] and [<sup>13</sup>C/<sup>15</sup>N] signature peptides will be spiked into digested, human K<sub>2</sub>EDTA plasma and analyzed by LC-MRM/MS. All sample preparation will be performed at NIST prior to distribution of the sample kits. Results from Study I will yield the optimum LOD/LOQ for each peptide because the design isolates the variability of recovery due to protein digestion and subsequent sample handling.

#### **Study II: Single site digestion of target proteins spiked into diluted, digested plasma**

In Study II, human K<sub>2</sub>EDTA plasma and an equimolar mixture of the seven target proteins will be digested **separately** with trypsin at a single site (NIST). The target protein digest mixture will be added to diluted, digested plasma at equivalent concentrations used in Study I. Similarly, the same concentration of IS peptides (internal standard) will also be added (50 fmol/μL). Bulk digestion of the target proteins will control for unknown digestion efficiency across decreasing concentration points. Results from Study II will yield LOD/LOQs that take into account variability of digestion efficiency and peptide recovery.

**Study III: Simulation of a verification study across CPTAC sites**

In Study III, the seven target proteins will be spiked into human K<sub>2</sub>EDTA plasma prior to digestion. Preparation of the identical standard curve as applied in Studies I and II will be performed at NIST prior to distribution of the sample kits. A detailed SOP for digestion, subsequent sample handling, and instrumental analysis will be included for each lab. **Each participating CPTAC site must strictly follow the specifications of the SOP as outlined.** Results from Study III will mimic a “real world” verification study in which each site is responsible for sample preparation. Study III also rigorously tests the transferability and reproducibility of MRM-based assays for target proteins in plasma across multiple institutions.

Data from each of the studies will be analyzed similarly. The experimentally determined molar concentration of the spiked peptide or protein will be estimated and compared to its theoretical value for accuracy. A logarithmic plot of response versus known concentration from each of the three 9-point standard curves will be used to evaluate the linearity of the MRM measurement across the range of spiked peptide or protein concentrations thus providing evidence of a quantitative measurement process. Replicate analyses of the spiked plasma samples will provide estimates of assay precision (standard deviation and % CV), plus LOQ and LOD will be determined at defined signal-to-noise ratios (S/N). Blank runs of digested plasma with labeled peptides will provide estimates of chemical background levels in the absence of signature peptide peaks. Furthermore, an estimate of carryover will be determined by running a series of gradient HPLC washout runs. Finally, variation across CPTAC sites will be assessed for each of these characteristic analytical metrics.

**CPTAC Study I: Addition of [<sup>12</sup>C/<sup>14</sup>N] and [<sup>13</sup>C/<sup>15</sup>N] synthetic peptides into diluted, digested human plasma.****Methods: Sample Preparation for Study I**

All sample preparation and distribution of sample kits to participating CPTAC laboratories will be performed at NIST. SOP Figure A illustrates the sample preparation workflow. The seven target proteins to be quantitated along with their signature peptides are listed in SOP Table A.

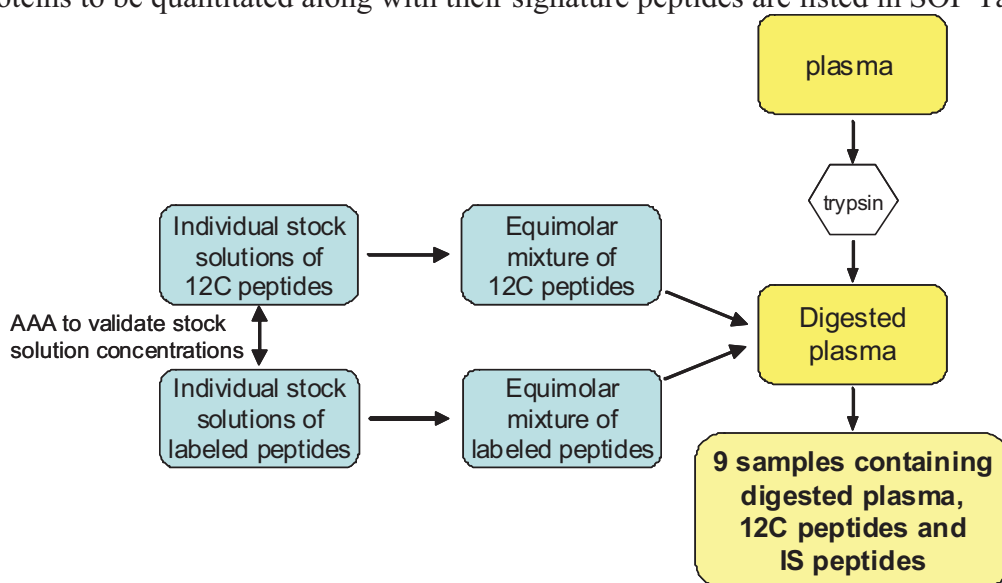

**SOP Figure A.** Sample preparation workflow for Study I. (IS, internal peptide standards)

SOP **Table A.** Target proteins and their [<sup>12</sup>C/<sup>14</sup>N] signature peptides.

| Target Protein                  | Species     | Signature Peptide |                 |               |
|---------------------------------|-------------|-------------------|-----------------|---------------|
|                                 |             | Identifier        | Sequence*       | MH+<br>(mono) |
| prostate specific antigen (PSA) | human       | bi0037            | LSEPAELTDAVK    | 1272.7        |
|                                 |             | bi0161            | IVGGWECEK       | 1077.5        |
| horseradish peroxidase (HRP)    | horseradish | bi0166            | SSDLVALSGGHTFGK | 1475.7        |
| leptin (LEP)                    | murine      | bi0167            | INDISHTQSVSAK   | 1399.7        |
| myelin basic protein (MBP)      | bovine      | bi0169            | HGFLPR          | 725.4         |
|                                 |             | bi0170            | YLASASTMDHAR    | 1322.6        |
| myoglobin (MYO)                 | equine      | bi0171            | LFTGHPETLEK     | 1271.7        |
| aprotinin (APR)                 | bovine      | bi0173            | AGLCQTFVYGGCR   | 1488.7        |
| C-reactive protein (CRP)        | human       | bi0231            | ESDTSYVSLK      | 1128.5        |
|                                 |             | bi0202            | GYSIFSYATK      | 1136.5        |
|                                 |             | ni0001            | YEVQEVFTKPQLWP  | 1820.9        |

\* cysteines are S-carboxyamidomethylated

Appendix A outlines the digestion procedure that will be employed for the bulk digestion of non-depleted plasma. Urea will be used as denaturant in all digestions and cysteine residues will be alkylated using iodoacetamide. After digestion and off-line desalting, digests will be lyophilized to dryness and resuspended in an aqueous solution containing 3% acetonitrile and 5% formic acid. A dilution of the final reconstituted samples will reduce the acetonitrile and formic acid to <1 % and 0.6 %, respectively. No additional sample clean-up will be required.

Two kits containing all the necessary samples required to implement the SOP will be prepared by NIST: a tuning kit and a sample kit.

The tuning kit for Study I will contain:

- an equimolar mixture of the labeled IS peptides and unlabeled signature peptides for chromatographic and MS optimization

The sample kit for Study I will contain:

- a quality control (QC) mixture composed of the unlabeled and labeled synthetic peptides
- unspiked digested plasma
- digested plasma spiked with the isotopically labeled IS peptides
- digested plasma spiked with labeled IS peptides at a constant level and [<sup>12</sup>C/<sup>14</sup>N] synthetic peptides spanning a concentration range of 2.5 orders of magnitude

Details of each kit's contents according to sample type (tuning, QC, and plasma containing) are as follows:

**A. Tuning Samples for Study I**

- a. 500 fmol/ $\mu$ L mixture of all 11 unlabeled signature peptides and 11 labeled internal standard peptides
  - i. one 50  $\mu$ L aliquot supplied
  - ii. supplied in 1 % formic acid in water

**B. QC Sample (Sample I-QC)**

- a. Equimolar mixture of the 11 unlabeled and 11 labeled synthetic peptides at 50 fmol/ $\mu$ L
  - i. one 25  $\mu$ L aliquot supplied
  - ii. supplied in 1 % formic acid in water

**C. Plasma Samples for Study I**

- a. Unspiked, digested human plasma (Sample I-Blank)
  - i. one 25  $\mu$ L aliquot supplied
  - ii. plasma diluted approximately 60-fold to a total plasma protein concentration (prior to digestion) of approximately 1  $\mu$ g/ $\mu$ L
  - iii. supplied in 1 % formic acid in water (after desalting by SPE)
- b. Digested human plasma spiked with labeled IS peptides (Sample I-A)
  - i. two 25  $\mu$ L aliquots supplied
  - ii. plasma diluted approximately 60-fold to a total plasma protein concentration (prior to digestion) of approximately 1  $\mu$ g/ $\mu$ L
  - iii. 11 labeled IS peptides spiked at a concentration of 50 fmol/ $\mu$ L
  - iv. supplied in 1 % formic acid in water (after desalting by SPE)
- c. Digested human plasma spiked with 11 unlabeled synthetic peptides and 11 labeled IS peptides (Samples I-B to I-J)
  - i. one 25  $\mu$ L aliquot of each spike level supplied
  - ii. each spiked plasma sample has been diluted to a total plasma protein concentration (prior to digestion) of approximately 1  $\mu$ g/ $\mu$ L
  - iii. 11 labeled IS peptides spiked at a concentration of 50 fmol/ $\mu$ L
  - iv. Unlabeled synthetic peptides are spiked in at the following approximate concentrations:

| Sample (Study I) | Spiked [ $^{12}\text{C}/^{14}\text{N}$ ] peptide Concentration (fmol/ $\mu$ L) |
|------------------|--------------------------------------------------------------------------------|
| I -J             | 500                                                                            |
| I -I             | 275                                                                            |
| I -H             | 151                                                                            |

|      |      |
|------|------|
| I -G | 83   |
| I -F | 46   |
| I -E | 25   |
| I -D | 8.55 |
| I -C | 2.92 |
| I -B | 1.00 |

v. supplied in 1 % formic acid in water (after desalting by SPE)

### MRM Transitions for Studies I, II and III):

Solutions of each synthetic signature peptide were provided previously for optimization of instrument parameters at all CPTAC sites. SOP Table B lists the transitions for all labeled and unlabeled peptides for all 4000 QTRAP users. SOP Table C lists the transitions used for the Quantum mass spectrometer. Additional supplementary tables will report optimized instrument parameters for each individual, participating 4000 QTRAP instrument (*i.e.*, declustering potential [DP], collision energy [CE], and collision cell exit potential [CXP]) and for the participating Quantum instrument (*i.e.*, collision energy [CE]).

**SOP Table B.** MRM transitions and instrument parameters used on the seven 4000 QTRAP mass spectrometers (Studies I, II, and III). Boldface type indicates labeled peptide internal standard with labeled amino acid in red. Values in red, blue and black indicate 1<sup>st</sup>, 2<sup>nd</sup>, and 3<sup>rd</sup> MRM transitions, respectively, for each peptide pair.

| Protein | Signature Peptide* | Group Name | MH+ (mono) | z (Q1) | MRM Transitions |         | Fragment Ion Type | Identifier |
|---------|--------------------|------------|------------|--------|-----------------|---------|-------------------|------------|
|         |                    |            |            |        | Q1              | Q3      |                   |            |
| APR     | AGLCQTFVYGGCR      | bi0173     | 1488.7     | 2      | 744.8           | 858.39  | y7                | 173tr1_A   |
|         |                    |            |            | 2      | 744.8           | 959.44  | y8                | 173tr2_A   |
|         |                    |            |            | 2      | 744.8           | 1087.50 | y9                | 173tr3_A   |
|         | AGLCQTFVYGGCR      | bi0081     | 1493.7     | 2      | 747.3           | 863.41  | y7                | 173tr1_IS  |
|         |                    |            |            | 2      | 747.3           | 964.46  | y8                | 173tr2_IS  |
|         |                    |            |            | 2      | 747.3           | 1092.50 | y9                | 173tr3_IS  |
| LEP     | INDISHTQSVSAK      | bi0167     | 1399.7     | 3      | 467.2           | 586.80  | y11 <sup>2+</sup> | 167tr1_A   |
|         |                    |            |            | 3      | 467.2           | 643.82  | y12 <sup>2+</sup> | 167tr2_A   |
|         |                    |            |            | 3      | 467.2           | 720.39  | y7                | 167tr3_A   |
|         | INDISHTQSVSAK      | ni0101     | 1407.3     | 3      | 469.9           | 590.81  | y11 <sup>2+</sup> | 167tr1_IS  |
|         |                    |            |            | 3      | 469.9           | 647.83  | y12 <sup>2+</sup> | 167tr2_IS  |
|         |                    |            |            | 3      | 469.9           | 728.40  | y7                | 167tr3_IS  |
| MYO     | LFTGHPETLEK        | bi0171     | 1271.7     | 3      | 424.6           | 506.26  | y9 <sup>2+</sup>  | 171tr1_A   |
|         |                    |            |            | 3      | 424.6           | 579.79  | y10 <sup>2+</sup> | 171tr2_A   |
|         |                    |            |            | 3      | 424.6           | 716.38  | y6                | 171tr3_A   |
|         | LFTGHPETLEK        | ni0102     | 1279.7     | 3      | 427.2           | 510.27  | y9 <sup>2+</sup>  | 171tr1_IS  |
|         |                    |            |            | 3      | 427.2           | 583.80  | y10 <sup>2+</sup> | 171tr2_IS  |



|     |                        |        |        |       |        |        |                   |           |
|-----|------------------------|--------|--------|-------|--------|--------|-------------------|-----------|
|     |                        |        |        | 3     | 427.2  | 724.40 | y6                | 171tr3 IS |
| MBP | HGFLPR                 | bi0169 | 726.4  | 2     | 363.7  | 385.26 | y3                | 169tr1 A  |
|     |                        |        |        | 2     | 363.7  | 532.32 | y4                | 169tr2 A  |
|     |                        |        |        | 2     | 363.7  | 589.35 | y5                | 169tr3 A  |
|     |                        |        |        | 2     | 366.7  | 391.28 | y3                | 169tr1 IS |
|     | <b>HGFLPR</b>          | ni0104 | 732.4  | 2     | 366.7  | 538.34 | y4                | 169tr2 IS |
|     |                        |        |        | 2     | 366.7  | 595.37 | y5                | 169tr3 IS |
|     |                        |        |        | 3     | 441.5  | 488.22 | y9 <sup>2+</sup>  | 170tr1 A  |
|     | YLASASTMDHAR           | bi0170 | 1322.6 | 3     | 441.5  | 523.74 | y10 <sup>2+</sup> | 170tr2 A  |
|     |                        |        |        | 3     | 441.5  | 817.36 | y7                | 170tr3 A  |
|     |                        |        |        | 3     | 443.5  | 491.23 | y9 <sup>2+</sup>  | 170tr1 IS |
|     | <b>YLASASTMDHAR</b>    | ni0105 | 1328.6 | 3     | 443.5  | 526.75 | y10 <sup>2+</sup> | 170tr2 IS |
|     |                        |        |        | 3     | 443.5  | 823.38 | y7                | 170tr3 IS |
| 2   |                        |        |        | 539.3 | 808.33 | y6     | 161tr1 A          |           |
| PSA | IVGGWECEK              | bi0161 | 1077.5 | 2     | 539.3  | 865.35 | y7                | 161tr2 A  |
|     |                        |        |        | 2     | 539.3  | 964.42 | y8                | 161tr3 A  |
|     |                        |        |        | 2     | 541.7  | 808.33 | y6                | 161tr1 IS |
|     | <b>IVGGWECEK</b>       | bi0067 | 1082.5 | 2     | 541.7  | 865.35 | y7                | 161tr2 IS |
|     |                        |        |        | 2     | 541.7  | 969.44 | y8                | 161tr3 IS |
|     |                        |        |        | 2     | 636.8  | 775.42 | y7                | 37tr1 A   |
|     | LSEPAELTDAVK           | bi0037 | 1272.7 | 2     | 636.8  | 846.46 | y8                | 37tr2 A   |
|     |                        |        |        | 2     | 636.8  | 943.51 | y9                | 37tr3 A   |
|     |                        |        |        | 2     | 640.8  | 783.43 | y7                | 37tr1 IS  |
|     | <b>LSEPAELTDAVK</b>    | ni0107 | 1280.7 | 2     | 640.8  | 854.47 | y8                | 37tr2 IS  |
|     |                        |        |        | 2     | 640.8  | 951.52 | y9                | 37tr3 IS  |
|     |                        |        |        | 3     | 492.6  | 703.35 | y7                | 166tr1 A  |
| HRP | SSDLVALSGGHTFGK        | bi0166 | 1475.7 | 3     | 492.6  | 790.38 | y8                | 166tr2 A  |
|     |                        |        |        | 3     | 492.6  | 974.51 | y10               | 166tr3 A  |
|     |                        |        |        | 3     | 495.3  | 711.37 | y7                | 166tr1 IS |
|     | <b>SSDLVALSGGHTFGK</b> | ni0108 | 1483.8 | 3     | 495.3  | 798.40 | y8                | 166tr2 IS |
|     |                        |        |        | 3     | 495.3  | 982.52 | y10               | 166tr3 IS |
|     |                        |        |        | 2     | 564.8  | 609.36 | y5                | 231tr1 A  |
| CRP | ESDTSYVSLK             | bi0231 | 1128.5 | 2     | 564.8  | 696.39 | y6                | 231tr2 A  |
|     |                        |        |        | 2     | 564.8  | 797.44 | y7                | 231tr3 A  |
|     |                        |        |        | 2     | 568.8  | 617.37 | y5                | 231tr1 IS |
|     | <b>ESDTSYVSLK</b>      | ni0109 | 1136.6 | 2     | 568.8  | 704.41 | y6                | 231tr2 IS |
|     |                        |        |        | 2     | 568.8  | 805.45 | y7                | 231tr3 IS |
|     |                        |        |        | 2     | 568.8  | 716.36 | y6                | 202tr1 A  |
|     | GYSIFSYATK             | bi0202 | 1136.3 | 2     | 568.8  | 829.45 | y7                | 202tr2 A  |
|     |                        |        |        | 2     | 568.8  | 916.48 | y8                | 202tr3 A  |

|  |                   |        |        |   |              |                |     |           |
|--|-------------------|--------|--------|---|--------------|----------------|-----|-----------|
|  | <b>GYSIFSYATK</b> | ni0110 | 1144.6 | 2 | <b>572.8</b> | <b>724.38</b>  | y6  | 202tr1 IS |
|  |                   |        |        | 2 | <b>572.8</b> | <b>837.46</b>  | y7  | 202tr2 IS |
|  |                   |        |        | 2 | <b>572.8</b> | <b>924.49</b>  | y8  | 202tr3 IS |
|  | YEVOGEVFTKPQLWP   | ni0001 | 1820.9 | 2 | <b>911.0</b> | <b>1053.49</b> | b9  | 01 tr1 A  |
|  |                   |        |        | 2 | <b>911.0</b> | <b>1181.58</b> | b10 | 01 tr2 A  |
|  |                   |        |        | 2 | <b>911.0</b> | <b>1519.78</b> | b13 | 01 tr3 A  |
|  | YEVOGEVFTKPQLWP   | ni0111 | 1826.9 | 2 | <b>914.0</b> | <b>1053.49</b> | b9  | 01 tr1 IS |
|  |                   |        |        | 2 | <b>914.0</b> | <b>1181.58</b> | b10 | 01 tr2 IS |
|  |                   |        |        | 2 | <b>914.0</b> | <b>1525.80</b> | b13 | 01 tr3 IS |

- C denotes carboxyamidomethylated cysteine;
- Eight of the 11 IS peptides have been synthesized with a single, uniformly labeled [<sup>13</sup>C/<sup>15</sup>N] amino acid at the C-terminus, one IS peptide (group name ni0111) has been synthesized with a single uniformly labeled [<sup>13</sup>C] leucine, two IS peptides have been synthesized with a uniformly labeled [<sup>13</sup>C] valine (group names bi0081 and bi0067; latter two peptides containing carboxyamidomethylated cysteines).
- The column named “identifier” refers to transition notifications used in a MultiQuant method that was distributed to each participating 4000 QTRAP site.

**SOP Table C.** MRM transitions used on one TSQ Quantum Ultra mass spectrometer (Studies I, II, and III). Boldface type indicates labeled peptide internal standard with labeled amino acid in red. Values in red, blue and black indicate 1<sup>st</sup>, 2<sup>nd</sup>, and 3<sup>rd</sup> MRM transitions, respectively, for each peptide pair.

| Protein | Signature Peptide*               | Group Name | MH+ (mono) | z (Q1) | MRM Transitions |               | Fragment Ion Type | Identifier |
|---------|----------------------------------|------------|------------|--------|-----------------|---------------|-------------------|------------|
|         |                                  |            |            |        | Q1              | Q3            |                   |            |
| APR     | AGLC <u>C</u> QTFVYGG <u>C</u> R | bi0173     | 1488.7     | 2      | <b>744.8</b>    | <b>711.23</b> | y6                | 744_1      |
|         |                                  |            |            | 2      | <b>744.8</b>    | <b>858.39</b> | y7                | 744_2      |
|         |                                  |            |            | 2      | 744.8           | 959.44        | y8                | 744_3      |
|         | AGLC <u>C</u> QTFVYGG <u>C</u> R | bi0081     | 1493.7     | 2      | <b>747.3</b>    | <b>716.53</b> | y6                | 747_1      |
|         |                                  |            |            | 2      | <b>747.3</b>    | <b>863.41</b> | y7                | 747_2      |
|         |                                  |            |            | 2      | <b>747.3</b>    | <b>946.46</b> | y8                | 747_3      |
| LEP     | INDISHTQSVSAK                    | bi0167     | 1399.7     | 3      | <b>467.2</b>    | <b>586.80</b> | y11 <sup>2+</sup> | 467_1      |
|         |                                  |            |            | 3      | <b>467.2</b>    | <b>643.82</b> | y12 <sup>2+</sup> | 467_2      |
|         |                                  |            |            | 3      | 467.2           | 720.39        | y7                | 467_3      |
|         | INDISHTQSVSA <b>K</b>            | ni0101     | 1407.3     | 3      | <b>469.9</b>    | <b>590.81</b> | y11 <sup>2+</sup> | 469_1      |
|         |                                  |            |            | 3      | <b>469.9</b>    | <b>647.83</b> | y12 <sup>2+</sup> | 469_1      |
|         |                                  |            |            | 3      | <b>469.9</b>    | <b>728.40</b> | y7                | 469_1      |
| MYO     | LFTGHPETLEK                      | bi0171     | 1271.7     | 3      | <b>424.6</b>    | <b>506.26</b> | y9 <sup>2+</sup>  | 424_1      |
|         |                                  |            |            | 3      | <b>424.6</b>    | <b>579.79</b> | y10 <sup>2+</sup> | 424_2      |
|         |                                  |            |            | 3      | 424.6           | 716.38        | y6                | 424_3      |
|         | LFTGHPETLE <b>K</b>              | ni0102     | 1279.7     | 3      | <b>427.2</b>    | <b>510.27</b> | y9 <sup>2+</sup>  | 427_1      |
|         |                                  |            |            | 3      | <b>427.2</b>    | <b>583.80</b> | y10 <sup>2+</sup> | 427_2      |
|         |                                  |            |            | 3      | <b>427.2</b>    | <b>724.40</b> | y6                | 427_3      |
| MBP     | HGFLPR                           | bi0169     | 726.4      | 2      | <b>363.7</b>    | <b>455.24</b> | b4                | 363_1      |

|                     |                        |               |               |        |              |               |                   |       |       |
|---------------------|------------------------|---------------|---------------|--------|--------------|---------------|-------------------|-------|-------|
|                     | <b>HGFLPR</b>          | <b>ni0104</b> | <b>732.4</b>  | 2      | 363.7        | 532.32        | y4                | 363_2 |       |
|                     |                        |               |               | 2      | 363.7        | 589.35        | y5                | 363_3 |       |
|                     |                        |               |               | 2      | <b>366.7</b> | <b>455.24</b> | b4                | 366_1 |       |
|                     |                        |               |               | 2      | <b>366.7</b> | <b>538.34</b> | y4                | 366_2 |       |
|                     | YLASASTMDHAR           | bi0170        | 1322.6        | 3      | <b>441.5</b> | <b>523.74</b> | y10 <sup>2+</sup> | 441_1 |       |
|                     |                        |               |               | 3      | 441.5        | 730.33        | y6                | 441_2 |       |
|                     |                        |               |               | 3      | 441.5        | 817.36        | y7                | 441_3 |       |
|                     | <b>YLASASTMDHAR</b>    | <b>ni0105</b> | <b>1328.6</b> | 3      | <b>443.5</b> | <b>526.75</b> | y10 <sup>2+</sup> | 443_1 |       |
|                     |                        |               |               | 3      | <b>443.5</b> | <b>736.35</b> | y6                | 443_2 |       |
|                     |                        |               |               | 3      | <b>443.5</b> | <b>823.38</b> | y7                | 443_3 |       |
|                     | <b>PSA</b>             | IVGGWECEK     | bi0161        | 1077.5 | 2            | <b>539.3</b>  | <b>808.33</b>     | y6    | 539_1 |
|                     |                        |               |               |        | 2            | 539.3         | 865.35            | y7    | 539_2 |
| 2                   |                        |               |               |        | 539.3        | 964.42        | y8                | 539_3 |       |
| <b>IVGGWECEK</b>    |                        | <b>bi0067</b> | <b>1082.5</b> | 2      | <b>541.7</b> | <b>808.33</b> | y6                | 541_1 |       |
|                     |                        |               |               | 2      | <b>541.7</b> | <b>865.35</b> | y7                | 541_2 |       |
|                     |                        |               |               | 2      | <b>541.7</b> | <b>969.44</b> | y8                | 541_3 |       |
| LSEPAELTDAVK        |                        | bi0037        | 1272.7        | 2      | <b>636.8</b> | <b>646.38</b> | y6                | 636_1 |       |
|                     |                        |               |               | 2      | 636.8        | 846.46        | y8                | 636_2 |       |
|                     |                        |               |               | 2      | 636.8        | 943.51        | y9                | 636_3 |       |
| <b>LSEPAELTDAVK</b> |                        | <b>ni0107</b> | <b>1280.7</b> | 2      | <b>640.8</b> | <b>654.39</b> | y6                | 640_1 |       |
|                     |                        |               |               | 2      | <b>640.8</b> | <b>854.47</b> | y8                | 640_2 |       |
|                     |                        |               |               | 2      | <b>640.8</b> | <b>951.52</b> | y9                | 640_3 |       |
| <b>HRP</b>          | SSDLVALSGGHTFGK        | bi0166        | 1475.7        | 3      | <b>492.6</b> | <b>703.35</b> | y7                | 492_1 |       |
|                     |                        |               |               | 3      | 492.6        | 790.38        | y8                | 492_2 |       |
|                     |                        |               |               | 3      | 492.6        | 974.51        | y10               | 492_3 |       |
|                     | <b>SSDLVALSGGHTFGK</b> | <b>ni0108</b> | <b>1483.8</b> | 3      | <b>495.3</b> | <b>711.37</b> | y7                | 495_1 |       |
|                     |                        |               |               | 3      | <b>495.3</b> | <b>798.40</b> | y8                | 495_2 |       |
|                     |                        |               |               | 3      | <b>495.3</b> | <b>982.52</b> | y10               | 495_3 |       |
| <b>CRP</b>          | ESDTSYVSLK             | bi0231        | 1128.5        | 2      | <b>564.8</b> | <b>609.36</b> | y5                | 564_1 |       |
|                     |                        |               |               | 2      | 564.8        | 696.39        | y6                | 564_2 |       |
|                     |                        |               |               | 2      | 564.8        | 797.44        | y7                | 564_3 |       |
|                     | <b>ESDTSYVSLK</b>      | <b>ni0109</b> | <b>1136.6</b> | 2      | <b>568.8</b> | <b>617.37</b> | y5                | 568_1 |       |
|                     |                        |               |               | 2      | <b>568.8</b> | <b>704.41</b> | y6                | 568_2 |       |
|                     |                        |               |               | 2      | <b>568.8</b> | <b>805.45</b> | y7                | 568_3 |       |
|                     | GYSIFSYATK             | bi0202        | 1136.3        | 2      | <b>568.8</b> | <b>716.36</b> | y6                | 568_1 |       |
|                     |                        |               |               | 2      | 568.8        | 829.45        | y7                | 568_2 |       |
|                     |                        |               |               | 2      | 568.8        | 916.48        | y8                | 568_3 |       |
|                     | <b>GYSIFSYATK</b>      | <b>ni0110</b> | <b>1144.6</b> | 2      | <b>572.8</b> | <b>724.38</b> | y6                | 572_1 |       |
|                     |                        |               |               | 2      | <b>572.8</b> | <b>837.46</b> | y7                | 572_2 |       |

|                  |        |        |   |       |         |        |       |       |
|------------------|--------|--------|---|-------|---------|--------|-------|-------|
|                  |        |        |   | 2     | 572.8   | 924.49 | y8    | 572_3 |
| YEVOQGEVFTKPOLWP | ni0001 | 1820.9 | 2 | 911.0 | 805.37  | b7     | 911_1 |       |
|                  |        |        | 2 | 911.0 | 1016.56 | y8     | 911_2 |       |
|                  |        |        | 2 | 911.0 | 1053.49 | b9     | 911_3 |       |
|                  |        |        | 2 | 914.0 | 805.37  | b7     | 914_1 |       |
| YEVOQGEVFTKPOLWP | ni0111 | 1826.9 | 2 | 914.0 | 1022.58 | y8     | 914_2 |       |
|                  |        |        | 2 | 914.0 | 1053.49 | b9     | 914_3 |       |
|                  |        |        | 2 | 914.0 | 1053.49 | b9     | 914_3 |       |

- C denotes carboxyamidomethylated cysteine
- Eight of the 11 IS peptides have been synthesized with a single, uniformly labeled [<sup>13</sup>C/<sup>15</sup>N] amino acid at the C-terminus, one IS peptide (ni0111) has been synthesized with a single uniformly labeled [<sup>13</sup>C] leucine, two IS peptides have been synthesized with a uniformly labeled [<sup>13</sup>C] valine (bi0081 and bi0067; latter two peptides containing carboxyamidomethylated cysteines).

### HPLC Chromatography Conditions for Studies I, II and III):

Individual CPTAC sites are expected to implement these HPLC conditions for the duration of the study. Packing material indicated below was provided previously. Please note that customized 1 µL sample loops made out of PEEKsil will be provided to each site for use on an Eksigent LC system. A flow diagram and column packing instructions are provided in Appendix D and Appendix E, respectively.

- Column: PicoFrit 75 µm ID (PF360-75-10-N-5, www.newobjective.com) slurry-packed with ReproSil-Pur C18-AQ, 3µm, 120Å to a length of 12 cm
- Mobile phases: (A) 0.1% Formic acid (v/v); (B) 90% Acetonitrile / 0.1% Formic acid (v/v)
- Flow rate: 200 nL/min on an Agilent or 300 nL/min on an Eksigent NanoLC system
- Injection volume: 1 µL
- Loop for Eksigent LC: 1 µL PEEKsil loop provided in sample kit, 100 µm ID PEEKsil
- Injection Amount: ≤ 1µg total protein on-column
- Gradient<sup>##</sup>: 3 – 20% B in 3 min, 20 – 60% B in 35 min, 60 – 90% B in 2 min, 90% B for 4 min

<sup>##</sup>**Agilent Notes:** 1 µL pickup with vial/bottom well sensing on. Flow rate was increased to 600 nL/min at 3% B for 15 minutes with injector valve in mainpass in order to flow sample through needle/loop onto column prior to start of gradient. Flow rate was reduced to 200 nL/min just prior to start of gradient. Needle was washed in flushport for 15 sec. Cleanup of the needle/loop is essential to decrease carryover. However, injection of solvent B into mainpass can affect equilibration of the system. A 20 minute hold at 3% B with the valve in mainpass (beginning or end of the program is critical for proper re-equilibration. Autosampler settings were as follows:

A 20 min hold in mainpass at initial conditions is **essential** to re-equilibrate mainpass prior to injection of sample.

| #  | Command                                               |
|----|-------------------------------------------------------|
| 1  | DRAW def. amount from sample, def. speed, def. offset |
| 2  | WAIT 0.05 min                                         |
| 3  | NEEDLE wash in flush port, 15.0 sec                   |
| 4  | WAIT 0.05 min                                         |
| 5  | INJECT                                                |
| 6  | REMOTE Startpulse                                     |
| 7  | WAIT 15.00 min                                        |
| 8  | VALVE bypass                                          |
| 9  | VALVE mainpass                                        |
| 10 | VALVE bypass                                          |
| 11 | VALVE mainpass                                        |
| 12 | VALVE bypass                                          |
| 13 | REPEAT 3 times*                                       |
| 14 | DRAW max. amount from Vial 2, def. speed, def. offset |
| 15 | EJECT max. amount into seat, def. speed               |
| 16 | END REPEAT                                            |
| 17 | REPEAT 5 times*                                       |
| 18 | DRAW max. amount from Vial 1, def. speed, def. offset |
| 19 | EJECT max. amount into seat, def. speed               |
| 20 | END REPEAT                                            |

600nL/min →

Buffer B { 14, 15, 16

Buffer A { 17, 18, 19

\*Can be increased to 5x injection of solvent B and 8x injection of solvent

**Eksigent/Tempo Notes:** HPLC conditions for this CPTAC Studies I-III.

| <u>Autosampler Program with Standard Injection*</u> |             |                  |                  |
|-----------------------------------------------------|-------------|------------------|------------------|
| #                                                   | Function    | Command          |                  |
| 1                                                   | Output      | 1-Off            |                  |
| 2                                                   | Output      | 2-Off            |                  |
| 3                                                   | Valve       | Injector Load    |                  |
| 4**                                                 | Aspirate    | 10 µL Reagent-1  | Speed:1 Height:5 |
| 5                                                   | Aspirate    | 2 µL Sample      | Speed:1 Height:2 |
| 6**                                                 | Aspirate    | 2.3 µL Reagent-1 | Speed:1 Height:5 |
| 7                                                   | Output      | 2-On             |                  |
| 8                                                   | Valve       | Injector Inject  |                  |
| 9                                                   | Dispense    | 14.3 µL Waste    | Speed:5 Height:0 |
| 10**                                                | Needle Wash | 200 µL           |                  |
| 11                                                  | End         |                  |                  |

  

| <u>Flow Table with Standard Injection*</u> |            |    |    |
|--------------------------------------------|------------|----|----|
| #                                          | Time (min) | %A | %B |
| 1                                          | 0          | 97 | 3  |
| 2                                          | 5          | 97 | 3  |
| 3                                          | 8          | 80 | 20 |
| 4                                          | 43         | 40 | 60 |
| 5                                          | 45         | 10 | 90 |
| 6                                          | 49         | 10 | 90 |
| 7                                          | 50         | 97 | 3  |
| 8                                          | 80         | 97 | 3  |

\*Full loop injection with loop in line throughout gradient  
\*\*Reagent-1 = Buffer A; Needle Wash = Buffer B

**NOTE: Total protein greater than 1 µg injected onto nanoLC columns can result in poor chromatographic peak shape and poor reproducibility from run to run. The plasma samples (Samples I-A through I-J, and I-Blank) have been diluted such that a 1 µL injection results in approximately 1.0 µg of total protein on-column. Therefore, they should be analyzed without any additional dilution.**

### **Triple Quadrupole Mass Spectrometer Instrumental Operating Parameters for Study I:**

The instrument conditions described below are target values for the 4000 QTRAP mass spectrometers. Participating CPTAC sites that use a mass spectrometer other than a 4000 QTRAP will need to adjust and report the operating parameters unique to their system. Each participating CPTAC site will be required to record all mass spectrometer instrumental operating conditions in the SOP Instrumental Parameters Excel spreadsheet (see additional supplementary tables).

- Ion Source voltage: 2200
- Curtain gas: 20
- Nebulizer gas: 5 psi
- IHT: 150
- DP, CE, CXP: Optimized and recorded for each signature peptide via infusion or flow injection. **NOTE: The same DP, CE and CXP values are to be used for each [<sup>12</sup>C/<sup>14</sup>N] / [<sup>13</sup>C/<sup>15</sup>N] peptide pair on a 4000 QTRAP.**
- Dwell time: 10 msec for 66 transitions (0.99 sec for entire cycle)
- Q1/Q3 resolution: Unit/Unit

### **Sample Analysis Run Order for Study I:**

Samples will be run in the following sequence:

| <b>Run Order</b> | <b># of Injections</b> | <b>Sample Name</b>     | <b>(original name*)</b> |
|------------------|------------------------|------------------------|-------------------------|
| 1                | 1                      | I -Blank               | (7.1-Blank)             |
| 2                | 4                      | I -A                   | (7.1-A)                 |
| 3                | 4                      | I -B                   | (7.1-B)                 |
| 4                | 4                      | I -C                   | (7.1-C)                 |
| 5                | 4                      | I -D                   | (7.1-D)                 |
| 6                | 4                      | I -E                   | (7.1-E)                 |
| 7                | 4                      | I -F                   | (7.1-F)                 |
| 8                | 4                      | I -QC                  | (7.1-QC)                |
| 9                | 4                      | I -G                   | (7.1-G)                 |
| 10               | 4                      | I -H                   | (7.1-H)                 |
| 11               | 4                      | I -I                   | (7.1-I)                 |
| 12               | 4                      | I -J                   | (7.1-J)                 |
| 13               | 4                      | I -A                   | (7.1-A)                 |
| 14               | 4                      | gradient wash out runs |                         |
| 15               | 4                      | I -A                   | (7.1-A)                 |

[\*Study 7.1 was the previous/original name of the study that in the manuscript is referred to as Study I, thus all raw data file names/sample names were saved under the name 7.1 at all sites.]

Initially, a single injection of unspiked digested plasma (Sample I-Blank) will be run for column conditioning purposes. Then four replicate injections of digested plasma spiked with the labeled IS peptides (Sample I-A) followed by four replicate injections of each sample containing digested plasma, target [ $^{12}\text{C}/^{14}\text{N}$ ] peptides and the labeled IS peptides (Samples I-B through I-J) will be run as well as the QC sample (Sample I-QC). Samples I-B through I-J will be analyzed in order of increasing concentration of the target proteins. Next, column carryover effects will be assessed by performing four gradient wash runs bracketed by four replicate injections of Sample I-A. To estimate the carryover effect it is important to record the information in each replicate for #13 and #14 in the order the replicate runs were performed. In addition, between Samples I-F and I-G one replicate injection of Sample I-QC will be analyzed to assess system performance midway through the assay. The estimated turn-around time for each MRM run is 80 minutes. Thus, a total of 54 runs will require a continuous run time of 72 hours or approximately 3 days.

### Data Recording and Analysis for Study I:

Participating CPTAC laboratories implementing the SOP with a 4000 QTRAP mass spectrometer will receive a MultiQuant method to be applied to their data files. Sites using the TSQ Quantum Ultra will implement the SOP by using Xcalibur software to create the instrument methods and processing of data files will utilize SRM Workflow (prototype software from ThermoFisher Scientific). Default parameters in MultiQuant are to be used for peak integration. Splitting factor can be adjusted as needed from 2 (default) to 1 or 0 to improve integration when necessary. Retention time should be adjusted for each analyte/IS pair. The relative area ratios of the three transitions per peptide are to be evaluated manually for matrix interferences (*i.e.*, co-eluting peptides with precursor/product transitions that may reside within the mass width of Q1 and Q3).

To facilitate transfer of data between MultiQuant and statistical packages, the column “Sample Names” in MultiQuant and Analyst is standardized across all CPTAC sites. This column is generated through the batch setup and should be cut and pasted into Analyst (4000 QTRAP users) from SOP Table D. The row names are constructed by concatenating “Study Number”, “Sample Number”, “Injection Number” with “,” in between.

**SOP Table D:** Sample Names for Batch setup in Analyst: Study I.

### Sample name for Study I (previous/original Study name was 7.1\*)

|               |                                                                             |
|---------------|-----------------------------------------------------------------------------|
|               | Copy column starting here and paste into “Sample Name”<br>column in Analyst |
| 7.1, Blank,01 |                                                                             |
| 7.1, A1, 01   |                                                                             |
| 7.1, A1, 02   |                                                                             |
| 7.1, A1, 03   |                                                                             |
| 7.1, A1, 04   |                                                                             |
| 7.1, B, 01    |                                                                             |
| 7.1, B, 02    |                                                                             |
| 7.1, B, 03    |                                                                             |
| 7.1, B, 04    |                                                                             |
| 7.1, C, 01    |                                                                             |

7.1, C, 02  
7.1, C, 03  
7.1, C, 04  
7.1, D, 01  
7.1, D, 02  
7.1, D, 03  
7.1, D, 04  
7.1, E, 01  
7.1, E, 02  
7.1, E, 03  
7.1, E, 04  
7.1, F, 01  
7.1, F, 02  
7.1, F, 03  
7.1, F, 04  
7.1, QC, 01  
7.1, G, 01  
7.1, G, 02  
7.1, G, 03  
7.1, G, 04  
7.1, H, 01  
7.1, H, 02  
7.1, H, 03  
7.1, H, 04  
7.1, I, 01  
7.1, I, 02  
7.1, I, 03  
7.1, I, 04  
7.1, J, 01  
7.1, J, 02  
7.1, J, 03  
7.1, J, 04  
7.1, A2, 01  
7.1, A2, 02  
7.1, A2, 03  
7.1, A2, 04  
7.1, gradient wash out, 01  
7.1, gradient wash out, 02  
7.1, gradient wash out, 03  
7.1, gradient wash out, 04  
7.1, A3, 01  
7.1, A3, 02  
7.1, A3, 03  
7.1, A3, 04

[\*Study 7.1 was the previous/original name of the study that in the manuscript is referred to as Study I, thus all raw data file names/sample names were saved under the name 7.1 at all sites]



The following variables need to be included when exporting the data from MultiQuant:

Sample.Name  
Component.Name  
Component.Group.Name  
Area  
Height  
Retention.Time  
Signal / Noise  
IS.Name  
IS Area  
IS Height  
IS Retention Time  
IS Signal / Noise

In MultiQuant, first select (left click) “All Analytes” in the left pane titled “Components and Groups”. Columns in the “Results Table” can be selected for display by right clicking in the blank line above the row of column names. Right clicking will bring up a list of choices, one of which is "Column settings...". Choose this one and it will bring up a list of all possible MultiQuant columns, with a "Visible" column for selecting the variables. The above column names should be ticked. Additional names can be ticked but the above names are required. Then left click “File”, select “Export” and slide over to first selection “Results Table...”. Export dialog box opens, use the default selections “Export only visible columns” and “Export all rows” and hit OK. In “Save As” dialog box, give name of file as “**CPTAC Study 7.1 siteXX – dateYY**” [Study 7.1 was the original name of the study that in the manuscript is referred to as Study I], where siteXX is name of your site, and dateYY is e.g. “18 Jul 2008”. This creates a tab delimited text file.

Once data analysis has been completed each CPTAC participating laboratory will forward their data in the tab delimited text file to a CPTAC study biostatistician. Statistical analysis of the results will be performed in collaboration with Experimental Design and Statistics Verification Studies Working Group statisticians.

**CPTAC Study II: Single site digestion of target proteins spiked into diluted, digested plasma:****Methods: Sample Preparation for Study II**

All sample preparation and distribution of sample kits to participating CPTAC laboratories will be performed at NIST. SOP Figure B illustrates the sample preparation workflow. The seven target proteins to be quantitated are listed in SOP Table A along with their signature peptides.

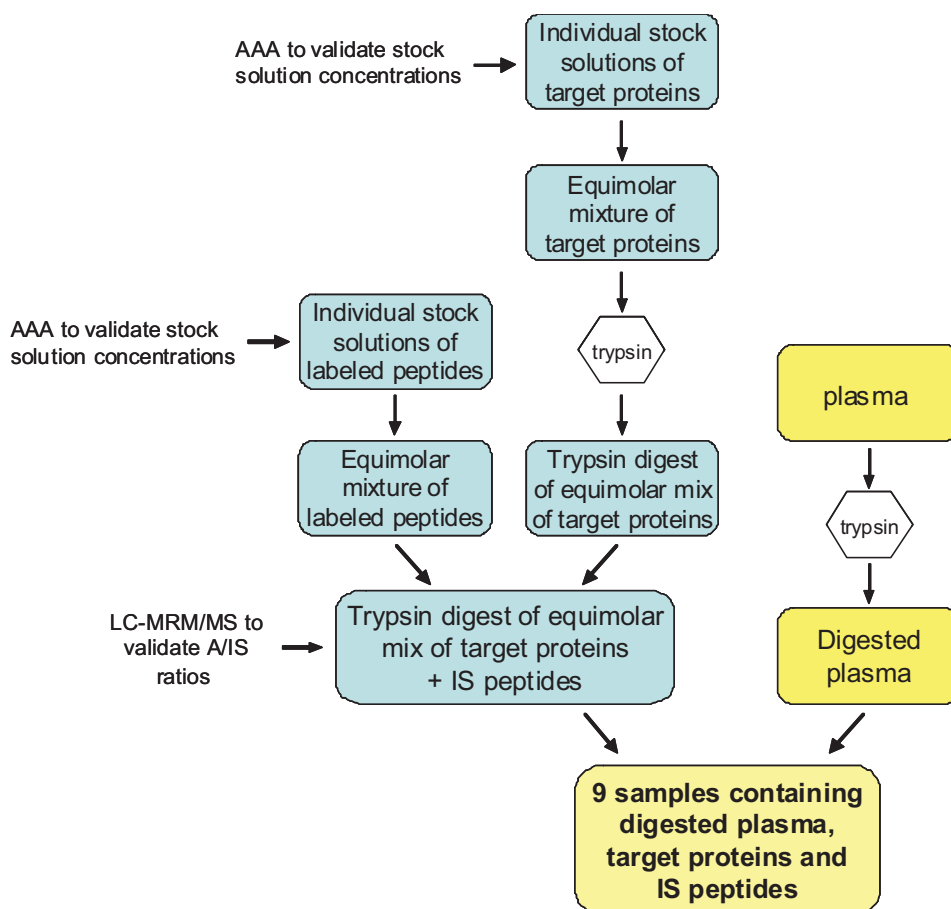

**SOP Figure B.** Sample preparation workflow for Study II (A, analyte (target) peptides; IS, internal standard peptides).

Appendices A and B outline the digestion procedure that will be employed for the bulk digestion of non-depleted plasma and the digestion of the equimolar mixture of target proteins, respectively. Urea will be used as denaturant in both digestions and cysteine residues will be alkylated using iodoacetamide. After digestion and off-line desalting, digests will be lyophilized to dryness and resuspended in an aqueous solution containing 3% acetonitrile and 5% formic acid. A dilution of the final reconstituted samples will reduce the acetonitrile and formic acid to <1 % and 0.6 %, respectively. No additional sample clean-up will be required.

Two kits containing all the necessary samples required to implement the SOP will be prepared by NIST: a tuning kit and a sample kit.

The tuning kit will contain:

- an equimolar mixture of the labeled IS peptides and unlabeled signature peptides for chromatographic and MS optimization

The sample kit will contain:

- a quality control (QC) mixture composed of equimolar amounts of the target [ $^{12}\text{C}/^{14}\text{N}$ ] and [ $^{13}\text{C}/^{15}\text{N}$ ] peptides
- unspiked digested plasma
- digested plasma spiked with the isotopically labeled IS peptides
- digested plasma spiked with labeled IS peptides at a constant level and the target protein digest spanning a concentration range of 2.5 orders of magnitude

Details of each kit's contents according to sample type (tuning, QC, and plasma containing) are as follows:

#### **D. Tuning Samples**

- a. 500 fmol/ $\mu\text{L}$  mixture of all 11 unlabeled signature peptides and 11 labeled internal standard peptides
  - i. one 50  $\mu\text{L}$  aliquot supplied
  - ii. supplied in 1 % formic acid in water

#### **E. QC Sample (Sample **II-QC**)**

- a. Tryptic digest of the target protein mixture, 50 fmol/ $\mu\text{L}$ , spiked with 50 fmol/ $\mu\text{L}$  of the 11 labeled IS peptides
  - i. one 25  $\mu\text{L}$  aliquot supplied
  - ii. supplied in 1 % formic acid in water (after desalting by SPE)

#### **F. Plasma Samples**

- a. Unspiked, digested human plasma (**Sample **II-Blank****)
  - i. one 25  $\mu\text{L}$  aliquot supplied
  - ii. plasma diluted approximately 60-fold to a total plasma protein concentration (prior to digestion) of approximately 1  $\mu\text{g}/\mu\text{L}$
  - iii. supplied in 1 % formic acid in water (after desalting by SPE)
- b. Digested human plasma spiked with labeled IS peptides (**Sample **II-A****)
  - i. two 25  $\mu\text{L}$  aliquots supplied
  - ii. plasma diluted approximately 60-fold to a total plasma protein concentration (prior to digestion) of approximately 1  $\mu\text{g}/\mu\text{L}$
  - iii. 11 labeled IS peptides spiked at a concentration of 50 fmol/ $\mu\text{L}$
  - iv. supplied in 1 % formic acid in water (after desalting by SPE)

- c. Digested human plasma spiked with digested target proteins and labeled IS peptides (**Samples II-B to II-J**)
- one 25  $\mu\text{L}$  aliquot of each spike level supplied
  - each spiked plasma sample has been diluted to a total plasma protein concentration (prior to digestion) of approximately 1  $\mu\text{g}/\mu\text{L}$
  - 11 labeled IS peptides spiked at a concentration of 50  $\text{fmol}/\mu\text{L}$
  - Target proteins are spiked in at the following concentrations:

| Sample (Study II) | Spiked Protein Concentration ( $\text{fmol}/\mu\text{L}$ ) |
|-------------------|------------------------------------------------------------|
| II -J             | 500                                                        |
| II -I             | 275                                                        |
| II -H             | 151                                                        |
| II -G             | 83                                                         |
| II -F             | 46                                                         |
| II -E             | 25                                                         |
| II -D             | 8.55                                                       |
| II -C             | 2.92                                                       |
| II -B             | 1.00                                                       |

- supplied in 1 % formic acid in water (after desalting by SPE)

#### MRM Transitions for Study II:

SOP Table B lists the MRM transitions for all labeled and unlabeled signature peptides for all 4000 QTRAP users. SOP Table C lists the transitions used for the TSQ Quantum Ultra mass spectrometer. Additional supplementary tables will report optimized instrument parameters for each individual, participating 4000 QTRAP instrument (*i.e.*, declustering potential [DP], collision energy [CE], and collision cell exit potential [CXP]) and for the participating Quantum instrument (*i.e.*, collision energy [CE]).

#### HPLC Chromatography Conditions for Study II:

Described above and identical to those conditions used for Study I.

**NOTE: Total protein greater than 1  $\mu\text{g}$  injected onto nanoLC columns can result in poor chromatographic peak shape and poor reproducibility from run to run. The plasma samples (Samples II-A through II-J, and II-Blank) have been diluted such that a 1  $\mu\text{L}$  injection results in approximately 1.0  $\mu\text{g}$  of total protein on-column. Therefore, they should be analyzed without any additional dilution.**

#### Triple Quadrupole Mass Spectrometer Instrumental Operating Parameters for Study II:

Described above and identical to those conditions used for Study I.

**Sample Analysis Run Order for Study II:**

Samples will be run in the following sequence:

| Run Order | # of Injections | Sample Name            | (original name*) |
|-----------|-----------------|------------------------|------------------|
| 1         | 1               | II -Blank              | (7.2-Blank)      |
| 2         | 4               | II -A                  | (7.2-A)          |
| 3         | 4               | II -B                  | (7.2-B)          |
| 4         | 4               | II -C                  | (7.2-C)          |
| 5         | 4               | II -D                  | (7.2-D)          |
| 6         | 4               | II -E                  | (7.2-E)          |
| 7         | 4               | II -F                  | (7.2-F)          |
| 8         | 4               | II -QC                 | (7.2-QC)         |
| 9         | 4               | II -G                  | (7.2-G)          |
| 10        | 4               | II -H                  | (7.2-H)          |
| 11        | 4               | II -I                  | (7.2-I)          |
| 12        | 4               | II -J                  | (7.2-J)          |
| 13        | 4               | II -A                  | (7.2-A)          |
| 14        | 4               | gradient wash out runs |                  |
| 15        | 4               | II -A                  | (7.2-A)          |

[\*Study 7.2 was the previous/original name of the study that in the manuscript is referred to as Study II, thus all raw data file names/sample names were saved under the name 7.2 at all sites.]

Initially, a single injection of unspiked digested plasma (Sample II-Blank) will be run for column conditioning purposes. Then four replicate injections of digested plasma spiked with the labeled IS peptides (Sample II-A) followed by four replicate injections of each sample containing digested plasma, target digested proteins and the IS labeled peptides (Samples II-B through II-J) will be run as well as the QC sample (Sample II-QC). Samples II-B through II-J will be analyzed in order of increasing concentration of the target proteins. Next, column carryover effects will be assessed by performing four gradient wash runs bracketed by four replicate injections of Sample II-A. To estimate the carryover effect it is important to record the information in each replicate for #13 and #14 in the order the replicate runs were performed. In addition, between Samples II-F and II-G four replicate injections of Sample II-QC will be analyzed to assess system performance midway through the assay. The estimated turn-around time for each MRM run is 80 minutes. Thus, a total of 57 runs will require a continuous run time of 76 hours or approximately 3.2 days.

**Data Recording and Analysis for Study II:**

Participating CPTAC laboratories implementing the SOP with a 4000 QTRAP mass spectrometer will receive a MultiQuant method to be applied to their data files. Sites using the TSQ Quantum Ultra will implement the SOP by using Xcalibur software to create the instrument methods and processing of data files will utilize SRM Workflow (prototype software from ThermoFisher Scientific). Default parameters in MultiQuant are to be used for peak integration. Splitting factor can be adjusted as needed from 2 (default) to 1 or 0 to improve integration when necessary. Retention time should be adjusted for each analyte/IS pair. The relative area ratios of the three transitions per peptide are to be evaluated manually for matrix interferences (*i.e.*, co-

eluting peptides with precursor/product transitions that may reside within the mass width of Q1 and Q3).

To facilitate transfer of data between MultiQuant and statistical packages, the column “Sample Names” in MultiQuant and Analyst is standardized across all CPTAC sites. This column is generated through the batch setup and should be cut and pasted into Analyst (4000 QTRAP users) from SOP Table E. The row names are constructed by concatenating “Study Number”, “Sample Number”, “Injection Number” with “,” in between.

**SOP Table E:** Sample Names for Batch setup in Analyst: Study II

**Sample name for the Study II (previous/original Study name was 7.2\*)**

Copy column starting here and paste into “Sample Name”  
column in Analyst

7.2, Blank,01  
7.2, A1, 01  
7.2, A1, 02  
7.2, A1, 03  
7.2, A1, 04  
7.2, B, 01  
7.2, B, 02  
7.2, B, 03  
7.2, B, 04  
7.2, C, 01  
7.2, C, 02  
7.2, C, 03  
7.2, C, 04  
7.2, D, 01  
7.2, D, 02  
7.2, D, 03  
7.2, D, 04  
7.2, E, 01  
7.2, E, 02  
7.2, E, 03  
7.2, E, 04  
7.2, F, 01  
7.2, F, 02  
7.2, F, 03  
7.2, F, 04  
7.2, QC, 01  
7.2, QC, 02  
7.2, QC, 03  
7.2, QC, 04  
7.2, G, 01  
7.2, G, 02  
7.2, G, 03  
7.2, G, 04  
7.2, H, 01

7.2, H, 02  
7.2, H, 03  
7.2, H, 04  
7.2, I, 01  
7.2, I, 02  
7.2, I, 03  
7.2, I, 04  
7.2, J, 01  
7.2, J, 02  
7.2, J, 03  
7.2, J, 04  
7.2, A2, 01  
7.2, A2, 02  
7.2, A2, 03  
7.2, A2, 04  
7.2, gradient wash out, 01  
7.2, gradient wash out, 02  
7.2, gradient wash out, 03  
7.2, gradient wash out, 04  
7.2, A3, 01  
7.2, A3, 02  
7.2, A3, 03  
7.2, A3, 04

[\*Study 7.2 was the previous/original name of the study that in the manuscript is referred to as Study II, thus all raw data file names/sample names were saved under the name 7.2 at all sites.]

The following variables need to be included when exporting the data from MultiQuant:

Sample.Name  
Component.Name  
Component.Group.Name  
Area  
Height  
Retention.Time  
Signal / Noise  
IS.Name  
IS Area  
IS Height  
IS Retention Time  
IS Signal / Noise

In MultiQuant, first select (left click) “All Analytes” in the left pane titled “Components and Groups”. Columns in the “Results Table” can be selected for display by right clicking in the blank line above the row of column names. Right clicking will bring up a list of choices, one of which is "Column settings...". Choose this one and it will bring up a list of all possible MultiQuant columns, with a "Visible" column for selecting the variables. The above column

names should be ticked. Additional names can be ticked but the above names are required. Then left click “File”, select “Export” and slide over to first selection “Results Table...”. Export dialog box opens, use the default selections “Export only visible columns” and “Export all rows” and hit OK. In “Save As” dialog box, give name of file as “**CPTAC Study 7.2 siteXX – dateYY**” [Study 7.2 was the original name of the study that in the manuscript is referred to as Study II], where siteXX is name of your site, and dateYY is e.g. “18 Jul 2008”. This creates a tab delimited text file.

Once data analysis has been completed each CPTAC participating laboratory will forward their data in the tab delimited text file to a CPTAC study biostatistician. Statistical analysis of the results will be performed in collaboration with Experimental Design and Statistics Verification Studies Working Group statisticians.



**CPTAC Study III: Simulation of a verification study across CPTAC sites.****Methods: Sample Preparation for Study III**

SOP Figure C illustrates the sample preparation workflow. A 9-point standard curve (prepared in triplicate) will be generated at NIST by spiking plasma with an equimolar mixture of the target proteins prior to trypsin digestion. The seven target proteins to be quantitated along with their signature peptides are identical to those used in Studies I and II (listed above in SOP Table A).

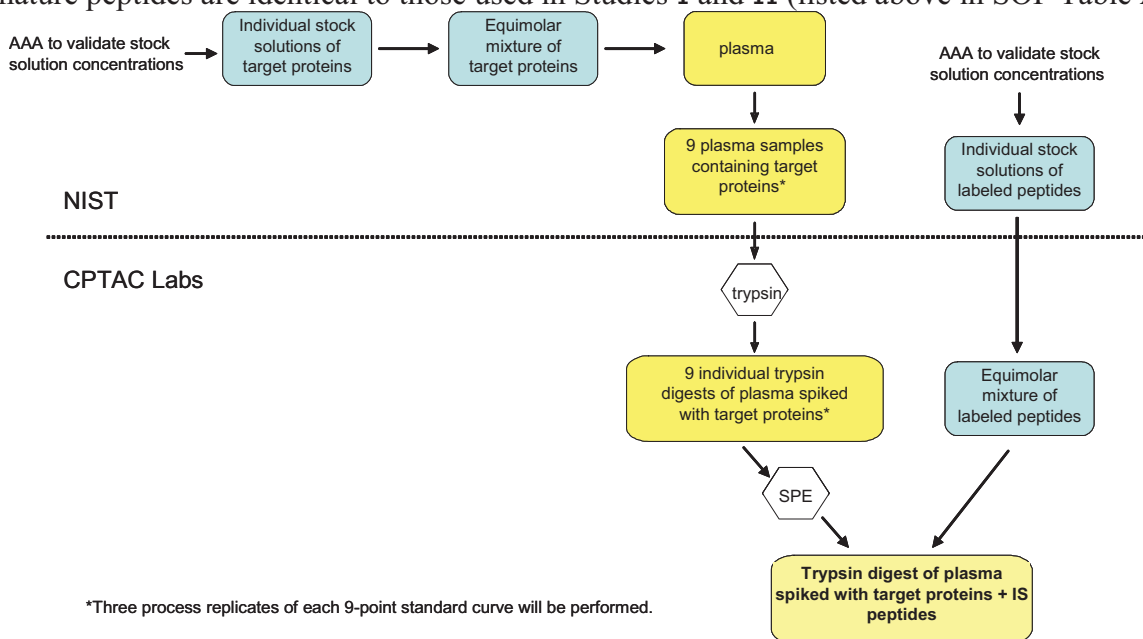

**SOP Figure C.** Sample preparation workflow for Study III (IS, internal standard peptides).

Appendix C describes the sample preparation performed at NIST for Study III. The sample kit for Study III will contain:

- an equimolar mixture of the labeled IS peptides and unlabeled signature peptides for chromatographic and MS optimization and validation
- a quality control (QC) mixture composed of an equimolar mixture of the 11 signature and 11 internal standard peptides
- unspiked and undigested plasma
- undigested plasma spiked with the seven target proteins
- an equimolar mixture of the 11 labeled internal standard peptides
- proteomics-grade trypsin

Details of each kit's contents according to sample type (tuning, QC, and plasma containing) are as follows:

**G. Tuning Sample for Study III**

- 500 fmol/ $\mu$ L mixture of all 11 unlabeled signature peptides and 11 labeled internal standard peptides
  - one 50  $\mu$ L aliquot supplied
  - supplied in 1 % formic acid in water

**H. QC Sample (Sample III-QC)**

- a. Equimolar mixture of the 11 unlabeled and 11 labeled synthetic peptides at 50 fmol/ $\mu$ L
  - i. three 35  $\mu$ L aliquots supplied
  - ii. supplied in 1 % formic acid in water

**I. Plasma Samples for Study III**

- a. Unspiked, undigested human plasma (**Sample III-Blank**)
  - i. three 35  $\mu$ L aliquots supplied
- b. Undigested human plasma (**Sample III-A**)
  - i. three 35  $\mu$ L aliquots supplied
- c. Undigested human plasma spiked with the seven target proteins (**Samples III-B to III-J**)
  - i. three 35  $\mu$ L aliquots of each spike level supplied

| Sample (Study III) | Spiked Target Protein Concentration (fmol/ $\mu$ L) |
|--------------------|-----------------------------------------------------|
| III -J             | 30,000                                              |
| III -I             | 16,500                                              |
| III -H             | 9,060                                               |
| III -G             | 4,980                                               |
| III -F             | 2,760                                               |
| III -E             | 1,500                                               |
| III -D             | 513                                                 |
| III -C             | 175                                                 |
| III -B             | 60                                                  |

**J. IS Peptide Mixture**

- a. 500 fmol/ $\mu$ L equimolar mixture of all 11 labeled internal standard peptides
  - i. three 150  $\mu$ L aliquots supplied
  - ii. supplied in 1 % formic acid in water

**K. Proteomics Grade Trypsin**

- a. Twelve vials of Promega Trypsin Gold (Catalog # V5280), each containing 100  $\mu$ g of lyophilized trypsin

**Digestion and Off-line Desalting Procedures for Three Process Replicates of Study III:**

The following protocols are to be used for the digestion of Sample III-Blank and Samples III-A through III-J (11 samples per process replicate). Urea will be used as denaturant in all digestions and cysteine residues will be alkylated using iodoacetamide. After digestion, samples will be desalted off-line via Oasis HLB cartridges, lyophilized to dryness and resuspended in an aqueous solution containing 3% acetonitrile and 5% formic acid. A dilution of the final reconstituted samples will reduce the acetonitrile and formic acid to ~1 % and 0.1 %, respectively, prior to LC-MRM/MS.

**I. Chemical Reagents and Recommended Sources**

The following chemicals are NOT provided in the sample kit from NIST:

1. Urea - Sigma Ultra, product # U0631.
2. DL-1,4-Dithiothreitol [DTT]- Pierce "no-weigh dithiothreitol", product # 20291 (pre-weighed in 7.7 mg aliquots to be used fresh for each experiment).
3. Iodoacetamide - Sigma, product # A3221-10VL (box of 10 pre-weighed ampules of 56 mg iodoacetamide)
4. Tris base -any source; however, needs to have been purchased within 1 year
5. Water, HPLC grade (Fisher, W5-1 or equivalent)
6. Acetonitrile, HPLC grade (Fisher, A998-1 or equivalent)
7. Formic Acid (EMD Suprapur)
8. Hydrochloric acid, certified grade (Fisher, 7647-01-0, or equivalent)

**Note that Promega Trypsin Gold mass spectrometry grade (4 x 100 µg per vial, Product # V5280) will be provided in the sample kit from NIST.**

**II. Reagent Preparation for Plasma and Target Protein Digestions****A. 1 M Tris, pH 8.0 - 250 mL**

1. To a 500 mL beaker, add 30.3 g solid Tris-base.
2. Add 150 mL deionized water and stir until dissolved.
3. Adjust pH of solution to 8.0 with concentrated HCl (12 M).
4. Transfer solution to 250 mL or 500 mL graduated cylinder and bring volume to 250 mL with deionized water.

**B. 9M urea, 300 mM Tris, pH 8.0 Stock - 50 mL**

**(This solution must be prepared fresh for each process replicate.)**

1. To a 100 mL beaker, add 27 g solid urea
2. Add 15 mL of water and 15 mL of 1 M Tris, pH 8.0 (Reagent A).
3. Add stir bar and place beaker in larger beaker of warm water. Stir until dissolved.  
**Keep temperature at or below 37 °C. Do not overheat.**
4. Measure pH and adjust to 8.0 if necessary.

5. Transfer to 50 or 100 mL graduated cylinder and bring volume to 50 mL with deionized water.
6. Store this stock for preparation of digestion buffer containing DTT (Reagent C).

**C. 9 M Urea, 300 mM Tris, pH 8.0, 20 mM DTT for digestion of plasma - 1 mL  
(This solution must be prepared fresh for each process replicate.)**

1. Remove 960  $\mu$ L of the urea/tris solution (Reagent B) and place in a 1.5 mL Eppendorf tube.
2. Withdraw a separate aliquot of 100  $\mu$ L of the urea/tris solution (Reagent B)) and add to one “no-weigh” tube of DTT (7.7 mg).
3. Solubilize the DTT, which will result in a final concentration of 0.5 M .
4. Add 40  $\mu$ L of the DTT solution to the 960  $\mu$ L aliquot of urea/tris solution and vortex.

**D. 0.5 M Iodoacetamide (IAM)  
(Prepare immediately before use and keep out of light)**

1. To one 56 mg vial of iodoacetamide, add 605  $\mu$ L of water.
2. Mix until dissolved.

**E. 100 mM Tris, pH 8.0 – 100 mL**

1. Add 10 mL of 1 M Tris, pH 8.0 stock (Reagent A) to a 100 mL graduated cylinder.
2. Add water to a final volume of 100 mL.

**F. 5% formic acid (v/v), 3% acetonitrile (v/v) in water - 100 mL**

1. In a 100 mL graduated cylinder, add 3 mL acetonitrile. Add water to the 90 mL mark.
2. Add 5 mL neat formic acid.
3. Add water to the 100 mL mark.
4. Mix by transferring into a larger vessel and store in a clean glass container.

### **III. Digestion Protocol for Plasma Samples**

**A. Preparation of Samples **III-Blank** and **III-A** through **III-J** (11 samples per process replicate)**

1. Combine 25  $\mu$ L of plasma (35  $\mu$ L is provided in each vial) with 50  $\mu$ L of 9M urea, 300 mM Tris, pH 8.0 containing 20 mmol/L DTT (Reagent C) in a 1.5 mL Eppendorf tube. Repeat for all samples (III-Blank and III-A through III-J).
2. Incubate for 30 min at 37 °C.
3. Add 6.5  $\mu$ L of 0.5 M IAM (Reagent D) to each tube, to yield an IAM concentration of 40 mM.
4. Alkylate at room temperature for 30 min in the dark.
5. Add 736.5  $\mu$ L of 100 mM Tris, pH 8.0 (Reagent E) to each tube to decrease the urea concentration to 0.55 M.

6. Remove a 50  $\mu\text{L}$  aliquot from each tube as the “before” sample for SDS-PAGE analysis of the digest. Freeze at  $-80\text{ }^{\circ}\text{C}$  until needed.
7. Dissolve each of 4 vials (100  $\mu\text{g}$  per vial) of Promega Trypsin Gold in 100  $\mu\text{L}$  of 100 mM Tris, pH 8.0 (Reagent E) and then combine. (Keep trypsin solution on ice and use quickly after preparation to avoid autolysis). Add 28.3  $\mu\text{L}$  to each digest with gentle mixing (do not vortex) to achieve a 1:50 enzyme-to-substrate ratio for  $\approx 1413\text{ }\mu\text{g}$  (or 1.4 mg) total protein present.
8. Incubate overnight (18 h) at  $37\text{ }^{\circ}\text{C}$ .
9. Remove a 50  $\mu\text{L}$  aliquot from each digest as the “after” sample for SDS-PAGE analysis of the digest and store at  $-80\text{ }^{\circ}\text{C}$  until needed.
10. Add 7.5  $\mu\text{L}$  of concentrated formic acid to each digest to quench the digestion for a final acid concentration of 1%.

## B. Offline Desalting of Digest Solutions via Oasis HLB SPE Cartridges

Each digest requires off-line desalting using Waters Oasis HLB 1 cc, 30 mg cartridges (Product # WAT094225, box of 100). A vacuum manifold (Product # WAT200677) and vacuum source will be required for the cartridges. Each participating lab is responsible for ordering the necessary equipment. Part numbers were provided previously to help each lab procure these items.

Please note that flow rate on the vacuum manifold cannot be tightly controlled if using typical house vacuum, and that multiple cartridges can flow at different rates. For optimum use, it is important that the SPE cartridges not be allowed to dry during the procedure. Therefore, it is strongly recommended that no more than 3 digests be desalted simultaneously. Total turnaround time to desalt 11 samples (2 cartridges in parallel) should take approximately 1.5 - 2 hours (15-20 minutes per processing).

1. Condition cartridge with 3 x 400  $\mu\text{L}$  of 0.1 % formic acid in 80 % ACN.
2. Equilibrate cartridge with 4 x 400  $\mu\text{L}$  of 0.1 % formic acid in 100 % water.
3. Reduce flow rate by lowering vacuum. A slower flow rate during sample loading, washing and eluting will minimize sample loss and maximize salt removal.
4. Add sample to cartridge.
5. Wash cartridge with 4 x 400  $\mu\text{L}$  of 0.1 % formic acid in 100 % water.
6. Elute plasma digest peptides with 3 x 400  $\mu\text{L}$  0.1 % formic acid in 80 % acetonitrile into 1.7 mL Eppendorf tubes.
7. Freeze eluates on dry ice or at  $-80\text{ }^{\circ}\text{C}$  for approximately 1 hour.
8. Dry samples to dryness via vacuum centrifugation. Do not dry overnight. Drying time should be approximately 2-4 hr.

Samples can be stored lyophilized at  $-80\text{ }^{\circ}\text{C}$  until ready for MRM analysis.

### C. Sample Reconstitution and $^{13}\text{C}/^{15}\text{N}$ IS Peptide Spikes (To be performed just prior to executing LC-MRM/MS.)

1. Reconstitute dried and desalted plasma digests with 25  $\mu\text{L}$  of 5 % formic acid, 3 % acetonitrile, 92% water and vortex.
2. Add 637.2  $\mu\text{L}$  of 3% acetonitrile, 0.1% formic acid to each sample to achieve 2  $\mu\text{g}/\mu\text{L}$  digest solution for the plasma samples.
3. Remove a 50  $\mu\text{L}$  aliquot of the 2  $\mu\text{g}/\mu\text{L}$  stock and place into separate Eppendorf tubes for each sample. Store remaining solution at  $-80\text{ }^{\circ}\text{C}$ .
4. Thaw the  $^{13}\text{C}/^{15}\text{N}$  IS peptide mixture provided in the sample kit (500 fmol/ $\mu\text{L}$  stock concentration; One stock tube of  $^{13}\text{C}/^{15}\text{N}$  IS peptide mixture per process replicate is provided.) and add 600  $\mu\text{L}$  of water to the 150  $\mu\text{L}$  of  $^{13}\text{C}/^{15}\text{N}$  IS peptide mixture in the tube. Add 50  $\mu\text{L}$  of this 100 fmol/ $\mu\text{L}$   $^{13}\text{C}/^{15}\text{N}$  IS peptide mixture to each sample, so that the final  $^{13}\text{C}/^{15}\text{N}$  peptide concentration is 50 fmol/ $\mu\text{L}$  and the plasma digest concentration is 1  $\mu\text{g}/\mu\text{L}$ . **It is important to add the 50  $\mu\text{L}$  of  $^{13}\text{C}/^{15}\text{N}$  peptide mixture into the 50  $\mu\text{L}$  of desalted plasma sample digest to minimize adsorptive losses that may occur if the  $^{13}\text{C}/^{15}\text{N}$  peptide mixture were added to the Eppendorf tube first.**

#### MRM Transitions for Study III:

Solutions of each synthetic signature peptide were provided previously for optimization of instrument parameters at all CPTAC sites. Target peptides are identical to those used in Studies I and II. The same instrument method that was used for these two studies should be used for Study III. SOP Table B lists the MRM transitions for all labeled and unlabeled signature peptides for all 4000 QTRAP users. SOP Table C lists the transitions used for the TSQ Quantum Ultra mass spectrometer. Additional supplementary tables will report optimized instrument parameters for each individual, participating 4000 QTRAP instrument (*i.e.*, declustering potential [DP], collision energy [CE], and collision cell exit potential [CXP]) and for the participating Quantum instrument (*i.e.*, collision energy [CE]).

#### HPLC Chromatography Conditions for Study III:

Described above and identical to those conditions used for Studies I and II.

**NOTE: Total protein greater than 1  $\mu\text{g}$  injected onto nanoLC columns can result in poor chromatographic peak shape and poor reproducibility from run to run. The instructions for reconstitution of all plasma samples (Samples III-A through III-J, and III-Blank) yield solutions that are 1  $\mu\text{g}/\mu\text{L}$  such that a 1  $\mu\text{L}$  injection results in approximately 1.0  $\mu\text{g}$  of total protein on-column.**

#### Triple Quadrupole Mass Spectrometer Instrumental Operating Parameters for Study III:

Described above and identical to those conditions used for Studies I and II.

**Sample Analysis Run Order for Study III:**

Samples for each process replicate will be run in the following sequence:

| Run Order | # of Injections | Sample Name            | (original name*) |
|-----------|-----------------|------------------------|------------------|
| 1         | 1               | III -Blank             | (7.3-Blank)      |
| 2         | 4               | III -A                 | (7.3-A)          |
| 3         | 4               | III -B                 | (7.3-B)          |
| 4         | 4               | III -C                 | (7.3-C)          |
| 5         | 4               | III -D                 | (7.3-D)          |
| 6         | 4               | III -E                 | (7.3-E)          |
| 7         | 4               | III -F                 | (7.3-F)          |
| 8         | 4               | III -QC                | (7.3-QC)         |
| 9         | 4               | III -G                 | (7.3-G)          |
| 10        | 4               | III -H                 | (7.3-H)          |
| 11        | 4               | III -I                 | (7.3-I)          |
| 12        | 4               | III -J                 | (7.3-J)          |
| 13        | 4               | III -A                 | (7.3-A)          |
| 14        | 4               | gradient wash out runs |                  |
| 15        | 4               | III -A                 | (7.3-A)          |

[\*Study 7.3 was the previous/original name of the Study that in the manuscript is referred to as Study III, thus all raw data file names/sample names were saved under the name 7.3 at all sites.]

Initially, a single injection of unspiked digested plasma (Sample III-Blank) will be run for column conditioning purposes. Then four replicate injections of digested plasma spiked with the labeled IS peptides (Sample III-A) followed by four replicate injections of each sample containing digested plasma, target [ $^{12}\text{C}/^{14}\text{N}$ ] peptides and the IS labeled peptides (Samples III-B through III-J) will be run as well as the QC sample (Sample III-QC). Samples III-B through III-J will be analyzed in order of increasing concentration of the target proteins. Next, column carryover effects will be assessed by performing four gradient wash runs bracketed by four replicate injections of Sample III-A. To estimate the carryover effect it is important to record the information in each replicate for samples #13 and #14 in the order the replicate runs were performed. In addition, between Samples III-F and III-G four replicate injections of Sample III-QC will be analyzed to assess system performance midway through the assay. The estimated turn-around time for each MRM run is 80 minutes. Thus, a total of 57 runs will require a continuous run time of 76 hours or approximately 3.2 days for each process replicate.

**Data Recording and Analysis for Study III:**

Participating CPTAC laboratories implementing the SOP with a 4000 QTRAP mass spectrometer will receive a MultiQuant method to be applied to their data files. Sites using the TSQ Quantum Ultra will implement the SOP by using Xcalibur software to create the instrument methods and processing of data files will utilize SRM Workflow (prototype software from ThermoFisher Scientific). Default parameters in MultiQuant are to be used for peak integration. Splitting factor can be adjusted as needed from 2 (default) to 1 or 0 to improve integration when necessary. Retention time should be adjusted for each analyte/IS pair. The relative area ratios of the three transitions per peptide are to be evaluated manually for matrix interferences (*i.e.*, co-

eluting peptides with precursor/product transitions that may reside within the mass width of Q1 and Q3).

To facilitate transfer of data between MultiQuant and statistical packages, the column “Sample Names” in MultiQuant and Analyst is standardized across all CPTAC sites. This column is generated through the batch setup and should be cut and pasted into Analyst (4000 QTRAP users) from SOP Table F. The row names are constructed by concatenating “Study Number”, “Sample Number”, “Injection Number” with “,” in between.

**SOP Table F:** Sample Names for Batch setup in Analyst: Study III.

**Sample name for the Study III (previous/original Study name was 7.3\*)**

Copy column starting here and paste into “Sample Name”  
column in Analyst

7.3, Blank,01  
7.3, A1, 01  
7.3, A1, 02  
7.3, A1, 03  
7.3, A1, 04  
7.3, B, 01  
7.3, B, 02  
7.3, B, 03  
7.3, B, 04  
7.3, C, 01  
7.3, C, 02  
7.3, C, 03  
7.3, C, 04  
7.3, D, 01  
7.3, D, 02  
7.3, D, 03  
7.3, D, 04  
7.3, E, 01  
7.3, E, 02  
7.3, E, 03  
7.3, E, 04  
7.3, F, 01  
7.3, F, 02  
7.3, F, 03  
7.3, F, 04  
7.3, QC, 01  
7.3, QC, 02  
7.3, QC, 03  
7.3, QC, 04  
7.3, G, 01  
7.3, G, 02  
7.3, G, 03  
7.3, G, 04



7.3, H, 01  
7.3, H, 02  
7.3, H, 03  
7.3, H, 04  
7.3, I, 01  
7.3, I, 02  
7.3, I, 03  
7.3, I, 04  
7.3, J, 01  
7.3, J, 02  
7.3, J, 03  
7.3, J, 04  
7.3, A2, 01  
7.3, A2, 02  
7.3, A2, 03  
7.3, A2, 04  
7.3, gradient wash out, 01  
7.3, gradient wash out, 02  
7.3, gradient wash out, 03  
7.3, gradient wash out, 04  
7.3, A3, 01  
7.3, A3, 02  
7.3, A3, 03  
7.3, A3, 04

[\*Study 7.3 was the previous/original name of the Study that in the manuscript is referred to as Study III, thus all raw data file names/sample names were saved under the name 7.3 at all sites.]

The following variables need to be included when exporting the data from MultiQuant:

Sample.Name  
Component.Name  
Component.Group.Name  
Area  
Height  
Retention.Time  
Signal / Noise  
IS.Name  
IS Area  
IS Height  
IS Retention Time  
IS Signal / Noise

In MultiQuant, first select (left click) “All Analytes” in the left pane titled “Components and Groups”. Columns in the “Results Table” can be selected for display by right clicking in the blank line above the row of column names. Right clicking will bring up a list of choices, one of which is "Column settings...". Choose this one and it will bring up a list of all possible

MultiQuant columns, with a "Visible" column for selecting the variables. The above column names should be ticked. Additional names can be ticked but the above names are required. Then left click "File", select "Export" and slide over to first selection "Results Table...". Export dialog box opens, use the default selections "Export only visible columns" and "Export all rows" and hit OK. In "Save As" dialog box, give name of file as "**CPTAC Study 7.3 siteXX – dateYY**" [Study 7.3 was the original name of the study that in the manuscript is referred to as Study III], where siteXX is name of your site, and dateYY is e.g. "18 Jul 2008". This creates a tab delimited text file.

Once data analysis has been completed each CPTAC participating laboratory will forward their data in the tab delimited text file to a CPTAC study biostatistician. Statistical analysis of the results will be performed in collaboration with Experimental Design and Statistics Verification Studies Working Group statisticians.

| <b>HPLC SOP Checklist</b>                 |                         |                                                  |              |
|-------------------------------------------|-------------------------|--------------------------------------------------|--------------|
| <b>HPLC Parameters and Chromatography</b> |                         |                                                  | <b>Notes</b> |
| <input type="checkbox"/>                  | Autosampler temperature | 4-10 °C                                          |              |
| <input type="checkbox"/>                  | Column dimensions       | 12cm x 75µm, 10µm tip                            |              |
| <input type="checkbox"/>                  | Column packing material | Reprosil 3 µm                                    |              |
| <input type="checkbox"/>                  | # of columns to pack    | 3 (initial column and 2 backup columns)          |              |
| <input type="checkbox"/>                  | Column temperature      | Room temperature                                 |              |
| <input type="checkbox"/>                  | Mobile phase A          | 0.1% (v/v) formic acid in water                  |              |
| <input type="checkbox"/>                  | Mobile phase B          | 90% (v/v) acetonitrile<br>0.1% (v/v) formic acid |              |
| <input type="checkbox"/>                  | Injection volume        | 1.0 µL                                           |              |
| <input type="checkbox"/>                  | Loop (Eksigent only)    | 100 µm PEEKsil                                   |              |
| <input type="checkbox"/>                  | Flow rate for gradient  | 300 nL/min (Eksigent)<br>200 nL/min (Agilent)    |              |
| <input type="checkbox"/>                  | Autosampler Method      | above                                            |              |
| <input type="checkbox"/>                  | 80 min HPLC program     | above                                            |              |

| <b>Mass Spectrometer SOP Checklist</b> |                                                                                   |                                              |              |
|----------------------------------------|-----------------------------------------------------------------------------------|----------------------------------------------|--------------|
| <b>Source/Gas parameters</b>           |                                                                                   |                                              | <b>Notes</b> |
| <input type="checkbox"/>               | Spray voltage                                                                     | 2200 ± 200 V                                 |              |
| <input type="checkbox"/>               | Curtain gas (4000 Q Trap)                                                         | 20                                           |              |
| <input type="checkbox"/>               | Nebulizer gas (GS1) (4000Q)                                                       | 5 ± 2 V                                      |              |
| <input type="checkbox"/>               | IHT or capillary temp                                                             | 150 °C                                       |              |
| <input type="checkbox"/>               | Tube lens                                                                         |                                              |              |
| <b>Compound Parameters</b>             |                                                                                   |                                              | <b>Notes</b> |
| <input type="checkbox"/>               | Total # of MRM transitions                                                        | 66                                           |              |
| <input type="checkbox"/>               | # of transitions per peptide                                                      | 3                                            |              |
| <input type="checkbox"/>               | Modification of instrument method to reflect changes in the masses of transitions |                                              |              |
| <input type="checkbox"/>               | DP, CE, CXP, tube lens                                                            | Same for labeled/<br>unlabeled peptide pairs |              |
| <input type="checkbox"/>               | Dwell Time                                                                        | 10 ms                                        |              |
| <b>MS detector</b>                     |                                                                                   |                                              | <b>Notes</b> |
| <input type="checkbox"/>               | Duration (min)                                                                    | 80                                           |              |
| <input type="checkbox"/>               | Cycle time (ms)                                                                   | 0.99 sec                                     |              |
| <input type="checkbox"/>               | Q1/Q3 Resolution                                                                  | unit/unit                                    |              |
| <input type="checkbox"/>               | Settling Time                                                                     | 0                                            |              |
| <input type="checkbox"/>               | Pause between mass ranges                                                         | 5 ms                                         |              |

**Appendix A: Digestion protocol performed at NIST for bulk digestion of human plasma to be used in Studies I and II.**

- a. Combine 1 mL of plasma with 2 mL of 9M urea, 150 mmol/L Tris, pH 8.0 containing 30 mmol/L DTT in a 50 mL tube (final concentrations of 6M urea, 100 mmol/L Tris, pH 8.0, 20 mmol/L DTT).
- b. Incubate for 30 min at 37 °C
- c. Add 260 µL of 0.5 mol/L iodoacetamide in water to yield an IAM concentration of 40 mmol/L
- d. Alkylate at room temperature for 30 min in the dark
- e. Add 25.7 mL of 100 mmol/L Tris, pH 8.0
- f. Remove a 10 µL aliquot as the “before” sample for the SDS-PAGE analysis of the digest.
- g. Dissolve 1 mg of Promega Trypsin Gold in 1 mL 100 mM Tris, pH 8.0 and add to digest with gentle mixing. (to achieve a 1:50 enzyme-to-substrate ratio for the ≈ 60 mg total protein present)
- h. Incubate overnight (18 h) at 37 °C
- i. Remove one 10 µL aliquot for SDS-PAGE.
- j. Add 300 µL of concentrated formic acid to quench the digestion for a final concentration of 1%.
- k. Perform SPE desalting using a Waters Oasis HLB vac 6 g (35 cc) extraction cartridge:
  - i. Condition cartridge with 3 x 20 mL of 0.1 % formic acid in 80 % ACN
  - ii. Equilibrate cartridge with 4 x 20 mL of 0.1 % formic acid in 100 % water
  - iii. Add sample to cartridge
  - iv. Wash cartridge with 4 x 20 mL of 0.1 % formic acid in 100 % water
  - v. Elute plasma digest peptides with 3 x 20 mL 0.1 % formic acid in 80 % ACN
  - vi. Lyophilize to dryness
- l. Reconstitute dried and desalted plasma digest with 12 mL of 5 % formic acid, 3 % acetonitrile, 92% water
- m. Add 48 mL of water for final concentrations of 1 % formic acid, 0.6 % acetonitrile, and 1 µg/µL of total protein.
- n. Take one 25 µL aliquot for LC-MS analysis.

**Appendix B: Digestion protocol performed at NIST for bulk digestion of target proteins to be used in Study II.**

- a. Co-lyophilize 150  $\mu\text{L}$  of each 100 pmol/ $\mu\text{L}$  protein stock solution into a 2 mL polypropylene centrifuge tube.
- b. Reconstitute with 150  $\mu\text{L}$  of 100 mmol/L Tris, pH 8.0, 5 mmol/L DTT, 6 mol/L urea.
- c. Heat for 30 min at 37  $^{\circ}\text{C}$ .
- d. Add 4.5  $\mu\text{L}$  of 0.5 mol/L IAM in water to obtain 15 mmol/L IAM in the sample.
- e. Alkylate for 30 min at room temperature in the dark.
- f. Add 745  $\mu\text{L}$  of 100 mmol/L Tris, pH 8.0 to dilute the urea concentration to 1 mol/L.
- g. Add 60  $\mu\text{L}$  of 1  $\mu\text{g}/\mu\text{L}$  Promega Gold trypsin in 100 mmol/L Tris (to achieve a 1:50 enzyme-to-substrate ratio for the  $\approx$  3 mg total protein present).
- h. Heat to 37  $^{\circ}\text{C}$  overnight ( $\approx$  18h).
- i. Add 10  $\mu\text{L}$  of concentrated formic acid to yield a concentration of 1 % formic acid in the digest
- j. Perform SPE desalting using a Waters Oasis HLB Vac 30 mg (1 cc) extraction cartridge:
  - i. Condition cartridge with 3 x 0.5 mL of 0.1 % formic acid in 80 % ACN
  - ii. Equilibrate cartridge with 4 x 0.5 mL of 0.1 % formic acid in 100 % water
  - iii. Add sample to cartridge
  - iv. Wash cartridge with 4 x 0.5 mL of 0.1 % formic acid in 100 % water
  - v. Elute plasma digest peptides with 3 x 0.5 mL 0.1 % formic acid in 80 % ACN
  - vi. Lyophilize to dryness
- k. Reconstitute the lyophilized desalted digest with 60  $\mu\text{L}$  of 5% formic acid, 3 % ACN, 92% water
- l. Add 240  $\mu\text{L}$  water to yield a digestion mixture with 50 pmol/ $\mu\text{L}$  of each of the seven target proteins in 1 % formic acid, 0.6 % acetonitrile

**Appendix C. Preparation of the Study III samples**

- o. To prepare Sample III-J, 3566  $\mu\text{L}$  of an equimolar mixture of the seven target proteins (50 pmol/ $\mu\text{L}$ ) will be freeze-dried into a 15 mL polypropylene tube and then reconstituted with 5943  $\mu\text{L}$  of human pooled  $\text{K}_2\text{EDTA}$  plasma; 75 x 35  $\mu\text{L}$  aliquots will be dispensed into 500  $\mu\text{L}$  screw-capped polypropylene tubes.
- p. To prepare Sample III-G through III-B, the dilution scheme outlined in SOP Table G below will be followed:

**SOP Table G.** Dilution scheme for the preparation of Sample III-I to III-B

| <b>Sample</b> | <b>Volume of Sample Used</b>       | <b>Volume Plasma Used</b> |
|---------------|------------------------------------|---------------------------|
| Sample III-I  | 3223 $\mu\text{L}$ of Sample III-J | 2637 $\mu\text{L}$        |
| Sample III-H  | 3140 $\mu\text{L}$ of Sample III-I | 2579 $\mu\text{L}$        |
| Sample III-G  | 2999 $\mu\text{L}$ of Sample III-H | 2457 $\mu\text{L}$        |
| Sample III-F  | 2735 $\mu\text{L}$ of Sample III-G | 2200 $\mu\text{L}$        |
| Sample III-E  | 2216 $\mu\text{L}$ of Sample III-F | 1861 $\mu\text{L}$        |
| Sample III-D  | 1357 $\mu\text{L}$ of Sample III-E | 2610 $\mu\text{L}$        |
| Sample III-C  | 1247 $\mu\text{L}$ of Sample III-D | 2404 $\mu\text{L}$        |
| Sample III-B  | 932 $\mu\text{L}$ of Sample III-C  | 1788 $\mu\text{L}$        |

- q. For Samples III-I through III-B, 75 x 35  $\mu\text{L}$  aliquots will be dispensed into 500  $\mu\text{L}$  screw-capped polypropylene tubes.
- r. For Sample III-A and Sample III-Blank, 75 x 35  $\mu\text{L}$  of the plasma pool will be aliquotted into 500  $\mu\text{L}$  screw-capped polypropylene tubes.
- s. To prepare Sample III-QC, approximately 90  $\mu\text{L}$  of the 1 pmol/ $\mu\text{L}$  equimolar mixture of the 11 signature peptides (light) will be combined with 90  $\mu\text{L}$  of a 1 pmol/ $\mu\text{L}$  equimolar mixture of the 11 IS peptides (heavy) and then diluted with 1620  $\mu\text{L}$  of 1 % formic acid in water to yield a 50 fmol/ $\mu\text{L}$  equimolar mixture of the 11 signature and 11 IS peptides; 50 x 35  $\mu\text{L}$  aliquots will be dispensed into 500  $\mu\text{L}$  screw-capped polypropylene tubes.
- t. All samples will be stored at  $-80\text{ }^\circ\text{C}$ .

**Appendix D: Typical HPLC Setup at one of the CPTAC sites**

All fused silica tubing was purchased from Polymicro Technologies. Lengths of tubing are dependent upon the distance between the LC and electrospray source, and are minimized to reduce delay volume.

**Note that 1  $\mu\text{L}$  fused silica loops have been replaced with custom 1  $\mu\text{L}$  PEEKsil.**

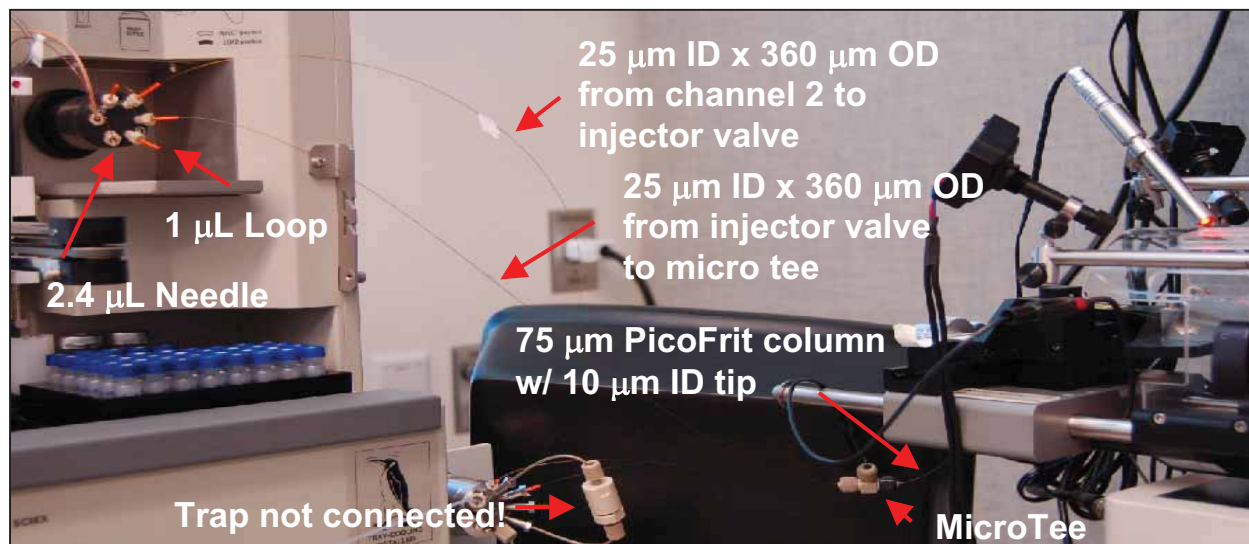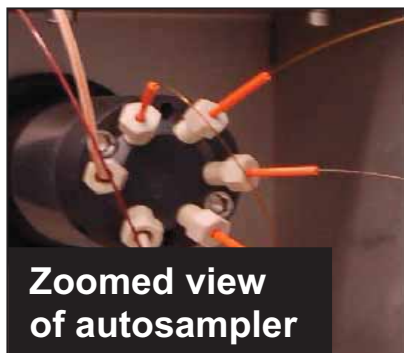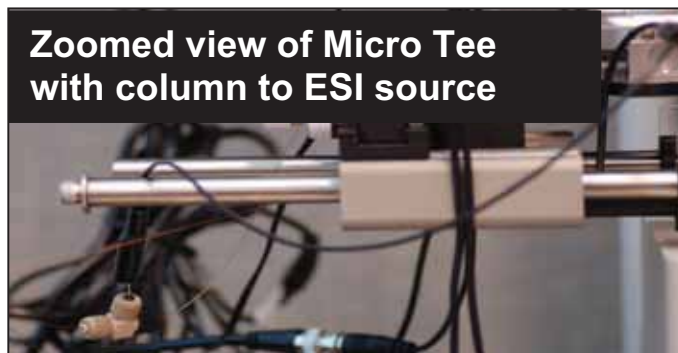

**Appendix E: Guidelines for Packing 75  $\mu$ m ID NanoLC Columns**

1. Prepare slurry of 3  $\mu$ m Reprosil material in 70% acetonitrile/30% isopropanol in borosilicate glass vial with stir bar.
2. Sonicate ~5 minutes
3. Wash Self Pack PicoFrit column with 70% acetonitrile/30% isopropanol for ~1-2 minutes.
4. Place slurry into a stainless steel pressure vessel on top of stir plate and connected to Helium (set to 500 psi).
5. Pack to desired length (12 cm) by pressurizing vessel.
6. After column has reached the appropriate length, turn off He and replace slurry with 0.1% formic acid.
7. Complete packing and wash/equilibrate with 0.1% formic acid for ~15-20 min.
8. Condition column with appropriate QC standard and/or blank gradient.



**Supplementary Table 1A: Overview of Experimental Metadata for Studies I, II, and IIIa-c from all eight CPTAC sites including seven 4000 QTRAPs and one TSQ Quantum Ultra. Chromatographic and Mass Spectrometric Details****Mass Spectrometric Parameters:**

| CPTAC sites:                                                                      |                                           | site @52            | site @56            | site @86             | site @95            | site @73            | site @19            | site @54            | site @65                                             |
|-----------------------------------------------------------------------------------|-------------------------------------------|---------------------|---------------------|----------------------|---------------------|---------------------|---------------------|---------------------|------------------------------------------------------|
| <b>Mass Spectrometer</b>                                                          |                                           | 4000 QTRAP          | 4000 QTRAP          | 4000 QTRAP           | 4000 QTRAP          | 4000 QTRAP          | 4000 QTRAP          | 4000 QTRAP          | TSQ Quantum Ultra                                    |
| <b>Source/Gas Parameters</b>                                                      | <b>recommended in SOP</b>                 |                     |                     |                      |                     |                     |                     |                     |                                                      |
| Spray voltage                                                                     | 2200 ± 200 V                              |                     |                     |                      |                     |                     |                     |                     |                                                      |
| Study I                                                                           |                                           | 2450                | 2200                | 2200                 | 3000                | 2300                | 2400                | 2200                | 1000                                                 |
| Study II                                                                          |                                           | 2450                | 2200                | 2200                 | 3000                | 2300                | 2500                | 2200                | 1000                                                 |
| Study IIIa-c                                                                      |                                           | 2450                | 2200                | 2200 (IIIa)          | 2200                | 2300                | 2500                | 2200                | 1200                                                 |
|                                                                                   |                                           |                     |                     | 2300 (IIIb and IIIc) |                     |                     |                     |                     |                                                      |
| Curtain gas (4000 QTRAP)                                                          | 20                                        |                     |                     |                      |                     |                     |                     |                     |                                                      |
| Study I                                                                           |                                           | 12                  | 20                  | 20                   | 20                  | 20                  | 20                  | 20                  | N/A                                                  |
| Study II                                                                          |                                           | 12                  | 20                  | 20                   | 20                  | 20                  | 20                  | 20                  | N/A                                                  |
| Study IIIa-c                                                                      |                                           | 12                  | 20                  | 20                   | 20                  | 20                  | 20                  | 20                  | N/A                                                  |
| Nebulizer gas (GS1) (4000 QTRAP)                                                  | 5 ± 2                                     |                     |                     |                      |                     |                     |                     |                     |                                                      |
| Study I                                                                           |                                           | 14                  | 3                   | 10                   | 35                  | 4                   | 4                   | 12                  | N/A                                                  |
| Study II                                                                          |                                           | 14                  | 3                   | 5                    | 35                  | 4                   | 8                   | 12                  | N/A                                                  |
| Study IIIa-c                                                                      |                                           | 14                  | 3                   | 5 (IIIa)             | 35                  | 4                   | 7                   | 12                  | N/A                                                  |
|                                                                                   |                                           |                     |                     | 20 (IIIb and IIIc)   |                     |                     |                     |                     |                                                      |
| IHT or capillary temperature                                                      | 150 °C                                    |                     |                     |                      |                     |                     |                     |                     |                                                      |
| Study I                                                                           |                                           | 150                 | 150                 | 150                  | 150                 | 150                 | 150                 | 150                 | capillary temperature of 210 °C                      |
| Study II                                                                          |                                           | 150                 | 150                 | 150                  | 150                 | 150                 | 150                 | 150                 | capillary temperature of 210 °C                      |
| Study IIIa-c                                                                      |                                           | 150                 | 150                 | 150                  | 150                 | 150                 | 150                 | 150                 | capillary temperature of 210 °C                      |
| <b>Compound Parameters</b>                                                        |                                           |                     |                     |                      |                     |                     |                     |                     |                                                      |
| Total # of MRM transitions                                                        | 66                                        | 66                  | 66                  | 66                   | 66                  | 66                  | 66                  | 66                  | 66                                                   |
| # of transitions per peptide                                                      | 3                                         | 3                   | 3                   | 3                    | 3                   | 3                   | 3                   | 3                   | 3                                                    |
| Modification of instrument method to reflect changes in the masses of transitions |                                           | //                  | //                  | //                   | //                  | //                  | //                  | //                  | //                                                   |
| DP, CE, CXP (tube lens for Quantum)                                               | Same for labeled/ unlabeled peptide pairs | yes (Suppl. Tables) | yes (Suppl. Tables) | yes (Suppl. Tables)  | yes (Suppl. Tables) | yes (Suppl. Tables) | yes (Suppl. Tables) | yes (Suppl. Tables) | yes (Suppl. Tables)                                  |
| Dwell Time                                                                        | 10 ms                                     | 10 ms               | 10 ms               | 10 ms                | 10 ms               | 10 ms               | 10 ms               | 10 ms               | Scan time = 15 ms (achieving 8-10 scans across peak) |
| CPTAC sites:                                                                      |                                           | site @52            | site @56            | site @86             | site @95            | site @73            | site @19            | site @54            | site @65                                             |
| <b>MS detector</b>                                                                |                                           |                     |                     |                      |                     |                     |                     |                     |                                                      |
| MS Acquisition Duration (min)                                                     | 80                                        | 80                  | 80                  | 80 min               | 80                  | 80                  | 80                  | 80                  | 85 min                                               |
| Cycle time (ms)                                                                   | 0.99 sec                                  | 0.99 sec            | 0.99 sec            | 0.89 sec             | 0.99 sec            | 0.99 sec            | 0.99 sec            | 0.9903 sec          | 0.99 sec                                             |
| Q1/Q3 Resolution                                                                  | unit/unit                                 | unit/unit           | unit/unit           | unit/unit            | unit/unit           | unit/unit           | unit/unit           | unit/unit           | unit/unit (0.7 FWHM)                                 |
| Settling Time                                                                     | 0                                         | 0                   | 0                   | 0                    | 0                   | 0                   | 0                   | 0                   | N/A                                                  |
| Pause between mass ranges                                                         | 5 ms                                      | 5.007 ms            | 5 ms                | 3.5 ms               | 5 ms                | 5 ms                | 5 ms                | 5.005 ms            | N/A                                                  |
| CAD Gas                                                                           | not defined                               | high                | medium              | 8                    | high                | high                | medium              | medium              | Argon                                                |
| <b>Quantum spec. Parameters</b>                                                   |                                           |                     |                     |                      |                     |                     |                     |                     |                                                      |
| Tube Lens (Quantum)                                                               |                                           | N/A                 | N/A                 | N/A                  | N/A                 | N/A                 | N/A                 | N/A                 | Determined during AutoTune                           |
| Q2 gas pressure (Quantum)                                                         |                                           | N/A                 | N/A                 | N/A                  | N/A                 | N/A                 | N/A                 | N/A                 | 1.5 mTorr                                            |
| capillary offset voltage (Quantum)                                                |                                           | N/A                 | N/A                 | N/A                  | N/A                 | N/A                 | N/A                 | N/A                 | 35 V                                                 |
| skimmer offset voltage (Quantum)                                                  |                                           | N/A                 | N/A                 | N/A                  | N/A                 | N/A                 | N/A                 | N/A                 | - 5 V                                                |
| <b>Software</b>                                                                   |                                           |                     |                     |                      |                     |                     |                     |                     |                                                      |
| MS software                                                                       | 4000 QTRAP Analyst version                | Analyst v1.4.2      | Analyst v1.5        | Analyst v1.4.2       | Analyst v1.4.2      | Analyst v1.5        | Analyst v1.5        | Analyst v1.4.2      | //                                                   |
| MS software                                                                       | Quantum Xcalibur version                  | //                  | //                  | //                   | //                  | //                  | //                  | //                  | Quantum v1.4.1/ Xcalibur v2.0.6                      |
| Data analysis software                                                            | ABI Multiquant version                    | Multiquant v1.0     | Multiquant v1.0.0.1 | Multiquant v1.0      | Multiquant v1.0.0.1 | Multiquant v1.0.0.1 | Multiquant v1.0.0.1 | Multiquant v1.0     | //                                                   |
| Data analysis software                                                            | Thermo / others                           | //                  | //                  | //                   | //                  | //                  | //                  | //                  | SRM Builder (beta test versions -- Thermo)           |

**Footnote:**

Chromatographic and Mass Spectrometric Parameters were recommended in the Standard Operating Procedure (SOP). Slight Deviations to the SOP were allowed in order for each site to optimize their platforms. All such SOP deviations (if applicable) are documented in this table.

**HPLC Parameters and Chromatography:**

| HPLC gradient described in SOP: |  | Gradient Step | Solvent % A | Solvent % B | Duration [min] |  |  |  |  |
|---------------------------------|--|---------------|-------------|-------------|----------------|--|--|--|--|
|                                 |  | 1             | 97          | 3           | 0              |  |  |  |  |
|                                 |  | 2             | 97          | 3           | 5              |  |  |  |  |
|                                 |  | 3             | 80          | 20          | 8              |  |  |  |  |
|                                 |  | 4             | 40          | 60          | 43             |  |  |  |  |
|                                 |  | 5             | 10          | 90          | 45             |  |  |  |  |
|                                 |  | 6             | 10          | 90          | 49             |  |  |  |  |
|                                 |  | 7             | 97          | 3           | 50             |  |  |  |  |
|                                 |  | 8             | 97          | 3           | 80             |  |  |  |  |

  

| CPTAC sites:                                  |                                               | site @52                                       | site @56                                       | site @86                                                                                                                             | site @95                                                                                                | site @73                                                                                             | site @19                                       | site @54                                       | site @65                                                                                                                                                         |
|-----------------------------------------------|-----------------------------------------------|------------------------------------------------|------------------------------------------------|--------------------------------------------------------------------------------------------------------------------------------------|---------------------------------------------------------------------------------------------------------|------------------------------------------------------------------------------------------------------|------------------------------------------------|------------------------------------------------|------------------------------------------------------------------------------------------------------------------------------------------------------------------|
| <b>HPLC Vendor</b>                            |                                               | Eksigent nano LC-2D                            | Eksigent nano LC-2D                            | Eksigent nano LC-2D                                                                                                                  | Agilent Agilent 1100 Nanosystem                                                                         | Eksigent nano LC-2D                                                                                  | Eksigent nano LC-2D                            | Eksigent nano LC-2D                            | Eksigent nano LC 1D Plus                                                                                                                                         |
| <b>Parameter</b>                              | <b>recommended in SOP</b>                     |                                                |                                                |                                                                                                                                      |                                                                                                         |                                                                                                      |                                                |                                                |                                                                                                                                                                  |
| Autosampler temperature                       | 4-10 °C                                       | 10-12 °C                                       | 4-10 °C                                        | 4-10 °C                                                                                                                              | 5 °C                                                                                                    | 9 °C                                                                                                 | 8 °C                                           | 15 °C                                          | 10 °C                                                                                                                                                            |
| Column dimensions                             | 12cm x 75µm, 10µm tip                         | 12cm x 75µm, 10µm tip                          | 12cm x 75µm, 10µm tip                          | 12cm x 75µm, 10µm tip                                                                                                                | 12cm x 75µm, 10µm tip                                                                                   | 12cm x 75µm, 10µm tip                                                                                | 12cm x 75µm, 10µm tip                          | 12cm x 75µm, 10µm tip                          | 11cm x 75µm, 10µm tip                                                                                                                                            |
| Column packing material                       | Reprosil 3 µm                                 | ReproSil-Pur C18-AQ                            | ReproSil-Pur C18-AQ                            | ReproSil-Pur C18-AQ                                                                                                                  | ReproSil-Pur C18-AQ                                                                                     | ReproSil-Pur C18-AQ                                                                                  | ReproSil-Pur C18-AQ                            | ReproSil-Pur C18-AQ                            | ReproSil-Pur C18-AQ                                                                                                                                              |
| # of columns to pack                          | 3 (initial column and 2 backup columns)       | yes                                            | yes                                            | yes                                                                                                                                  | yes                                                                                                     | yes                                                                                                  | yes                                            | yes                                            | yes                                                                                                                                                              |
| Column blank manufacturer (for "handpacking") |                                               |                                                |                                                |                                                                                                                                      |                                                                                                         | IntegraFrit 75 µm ID (New Objective), hand packed, coupled to SilicaTip 10µm emitter (New Objective) |                                                |                                                |                                                                                                                                                                  |
| Column temperature                            | Room temperature                              | PicoFrit 75 µm ID (New Objective), hand packed | PicoFrit 75 µm ID (New Objective), hand packed | PicoFrit 75 µm ID (New Objective), hand packed                                                                                       | PicoFrit 75 µm ID (New Objective), hand packed                                                          | yes                                                                                                  | PicoFrit 75 µm ID (New Objective), hand packed | PicoFrit 75 µm ID (New Objective), hand packed | PicoFrit 75 µm ID (New Objective), hand packed                                                                                                                   |
| Mobile phase A                                | 0.1% (v/v) formic acid in water               | yes                                            | yes                                            | yes                                                                                                                                  | yes                                                                                                     | yes                                                                                                  | yes                                            | yes                                            | yes                                                                                                                                                              |
| Mobile phase B                                | 90% (v/v) acetonitrile 0.1% (v/v) formic acid | 0.1% (v/v) FA                                  | 0.1% (v/v) FA                                  | 0.1% (v/v) FA                                                                                                                        | 0.1% (v/v) FA                                                                                           | 0.1% (v/v) FA                                                                                        | 0.1% (v/v) FA                                  | 0.1% (v/v) FA                                  | 0.1% (v/v) FA                                                                                                                                                    |
|                                               |                                               | 90% (v/v) ACN,                                 | 90% (v/v) ACN,                                 | 90% (v/v) ACN,                                                                                                                       | 90% (v/v) ACN,                                                                                          | 90% (v/v) ACN,                                                                                       | 90% (v/v) ACN,                                 | 90% (v/v) ACN,                                 | 90% (v/v) ACN,                                                                                                                                                   |
|                                               |                                               | 0.1% (v/v) FA                                  | 0.1% (v/v) FA                                  | 0.1% (v/v) FA                                                                                                                        | 0.1% (v/v) FA                                                                                           | 0.1% (v/v) FA                                                                                        | 0.1% (v/v) FA                                  | 0.1% (v/v) FA                                  | 0.1% (v/v) FA                                                                                                                                                    |
| Injection volume                              | 1.0 µL                                        | 1.0 µL                                         | 1.0 µL                                         | 1.0 µL                                                                                                                               | 1.0 µL                                                                                                  | 1.0 µL                                                                                               | 1.0 µL                                         | 1.0 µL                                         | 1.0 µL                                                                                                                                                           |
| Injection protocol                            | full loop injection                           | full loop injection                            | full loop injection                            | full loop injection                                                                                                                  | 1µL injected from 8 µL loop                                                                             | full loop injection                                                                                  | full loop injection                            | full loop injection                            | full loop injection                                                                                                                                              |
| Loop (Eksigent only)                          | 100 µm Peeksil                                | 100 µm Peeksil                                 | 100 µm Peeksil                                 | 100 µm Peeksil                                                                                                                       | 8 µL capillary loop                                                                                     | 100 µm Peeksil                                                                                       | 100 µm Peeksil                                 | 100 µm Peeksil                                 | 100 µm Peeksil                                                                                                                                                   |
| Flow rate for gradient                        | 300 nL/min (Eksigent)                         | 300 nL/min                                     | 300 nL/min                                     | 300 nL/min                                                                                                                           | //                                                                                                      | 300 nL/min                                                                                           | 300 nL/min                                     | 300 nL/min                                     | 300 nL/min                                                                                                                                                       |
|                                               | 200 nL/min (Agilent)                          | //                                             | //                                             | //                                                                                                                                   | 200 nL/min (Agilent)                                                                                    | //                                                                                                   | //                                             | //                                             | //                                                                                                                                                               |
| Autosampler Method                            | as described in SOP                           | yes                                            | yes                                            | yes                                                                                                                                  | yes                                                                                                     | yes                                                                                                  | yes                                            | yes                                            | yes                                                                                                                                                              |
| 80 min HPLC program                           | see above (as described in SOP)               | yes                                            | yes                                            | 5 min extended wash after the gradient (for studies I, II, and IIIa); for study IIb and IIIc 10 min extended wash after the gradient | at beginning of each run there was a 20 minute equilibration of the column at a flow rate of 600 nL/min | yes                                                                                                  | yes                                            | yes                                            | yes                                                                                                                                                              |
| additional comments                           |                                               | //                                             | //                                             | //                                                                                                                                   | //                                                                                                      |                                                                                                      | //                                             | //                                             | The column length was 11 cm length fitting the specific nanospray set-up at this site without having to reconfigure, i.e., re-configuration of electrodes, etc.) |
|                                               |                                               |                                                |                                                |                                                                                                                                      |                                                                                                         | Study I,II,III included a 1cm packed column (same material) in front of the nanocolumn               |                                                |                                                |                                                                                                                                                                  |

**Footnote:**  
 Chromatographic and Mass Spectrometric Parameters were recommended in the Standard Operating Procedure (SOP)  
 Slight Deviations to the SOP were allowed in order for each site to optimize their platforms. All such SOP deviations (if applicable) are documented in this table.

**Supplementary Table 1B: Overview of MRM Transitions from all eight CPTAC sites including seven 4000 QTRAPs and one TSQ Quantum Ultra, and Lists of specific Instrument Parameters: Decustering Potential (DP), Collision Energy (CE), and Collision Cell Exit Potential (CXP).**

**MRM Transitions and DP/CE/CXP Values**

**4000 QTRAP at CPTAC site @52**

| Protein                         | Signature Peptide   | Identifier   | MH+ (mono) | z (Q1)     | MRM Transitions |                |               | DP | CE  | CXP               | Fragment Ion Type |
|---------------------------------|---------------------|--------------|------------|------------|-----------------|----------------|---------------|----|-----|-------------------|-------------------|
|                                 |                     |              |            |            | Q1              | Q3             | Q3            |    |     |                   |                   |
| aprotinin (APR)                 | AGLCamcQTFVYGGCamcR | bi0173       | 1488.7     | 2          | <b>744.8</b>    | <b>858.4</b>   | 100           | 40 | 12  | y7                |                   |
|                                 |                     |              |            | 2          | 744.8           | 959.4          | 100           | 40 | 14  | y8                |                   |
|                                 |                     |              |            | 2          | 744.8           | 1087.5         | 100           | 38 | 17  | y9                |                   |
|                                 | AGLCamcQTFVYGGCamcR | bi0081       | 1493.7     | 2          | <b>747.3</b>    | <b>863.4</b>   | 100           | 40 | 12  | y7                |                   |
|                                 |                     |              |            | 2          | 747.3           | 964.4          | 100           | 40 | 14  | y8                |                   |
|                                 |                     |              |            | 2          | 747.3           | 1092.5         | 100           | 38 | 17  | y9                |                   |
| leptin (LEP)                    | INDISHTQSVSAK       | bi0167       | 1399.7     | 3          | <b>467.2</b>    | <b>586.8</b>   | 76            | 21 | 10  | y11 <sup>2+</sup> |                   |
|                                 |                     |              |            | 3          | 467.2           | 643.8          | 76            | 23 | 10  | y12 <sup>2+</sup> |                   |
|                                 |                     |              |            | 3          | 467.2           | 720.39         | 76            | 29 | 10  | y7                |                   |
|                                 | INDISHTQSVSAK       | ni0101       | 1407.3     | 3          | <b>469.9</b>    | <b>590.81</b>  | 76            | 21 | 10  | y11 <sup>2+</sup> |                   |
|                                 |                     |              |            | 3          | 469.9           | 647.83         | 76            | 23 | 10  | y12 <sup>2+</sup> |                   |
|                                 |                     |              |            | 3          | 469.9           | 728.4          | 76            | 29 | 10  | y7                |                   |
| myoglobin (MYO)                 | LFTGHPETLEK         | bi0171       | 1271.7     | 3          | <b>424.6</b>    | <b>506.3</b>   | 71            | 19 | 8   | y9 <sup>2+</sup>  |                   |
|                                 |                     |              |            | 3          | 424.6           | 579.8          | 71            | 20 | 8   | y10 <sup>2+</sup> |                   |
|                                 |                     |              |            | 3          | 424.6           | 716.4          | 71            | 25 | 10  | y6                |                   |
|                                 | LFTGHPETLEK         | ni0102       | 1279.7     | 3          | <b>427.2</b>    | <b>510.27</b>  | 71            | 19 | 8   | y9 <sup>2+</sup>  |                   |
|                                 |                     |              |            | 3          | 427.2           | 583.8          | 71            | 20 | 8   | y10 <sup>2+</sup> |                   |
|                                 |                     |              |            | 3          | 427.2           | 724.4          | 71            | 25 | 10  | y6                |                   |
| myelin basic protein (MBP)      | HGFLPR              | bi0169       | 726.4      | 2          | <b>363.7</b>    | <b>385.3</b>   | 70            | 23 | 16  | y3                |                   |
|                                 |                     |              |            | 2          | 363.7           | 532.3          | 70            | 23 | 12  | y4                |                   |
|                                 |                     |              |            | 2          | 363.7           | 589.4          | 70            | 23 | 8   | y5                |                   |
|                                 | HGFLPR              | ni0104       | 732.4      | 2          | <b>366.7</b>    | <b>391.3</b>   | 70            | 23 | 16  | y3                |                   |
|                                 |                     |              |            | 2          | 366.7           | 538.3          | 70            | 23 | 12  | y4                |                   |
|                                 |                     |              |            | 2          | 366.7           | 595.4          | 70            | 23 | 8   | y5                |                   |
|                                 | YLASASTMDHAR        | bi0170       | 1322.6     | 3          | <b>441.5</b>    | <b>488.2</b>   | 90            | 21 | 12  | y9 <sup>2+</sup>  |                   |
|                                 |                     |              |            | 3          | 441.5           | 523.7          | 90            | 19 | 16  | y10 <sup>2+</sup> |                   |
|                                 |                     |              |            | 3          | 441.5           | 817.4          | 90            | 24 | 14  | y7                |                   |
|                                 |                     | YLASASTMDHAR | ni0105     | 1328.6     | 3               | <b>443.5</b>   | <b>491.23</b> | 90 | 21  | 12                | y9 <sup>2+</sup>  |
|                                 |                     |              |            |            | 3               | 443.5          | 526.75        | 90 | 19  | 16                | y10 <sup>2+</sup> |
|                                 |                     |              |            |            | 3               | 443.5          | 823.38        | 90 | 24  | 14                | y7                |
| prostate specific antigen (PSA) | IVGGWECamcEK        | bi0161       | 1077.5     | 2          | <b>539.3</b>    | <b>808.3</b>   | 81            | 27 | 12  | y6                |                   |
|                                 |                     |              |            | 2          | 539.3           | 865.4          | 81            | 26 | 14  | y7                |                   |
|                                 |                     |              |            | 2          | 539.3           | 964.42         | 81            | 27 | 16  | y8                |                   |
|                                 | IVGGWECamcEK        | bi0067       | 1082.5     | 2          | <b>541.7</b>    | <b>808.33</b>  | 81            | 27 | 12  | y6                |                   |
|                                 |                     |              |            | 2          | 541.7           | 865.35         | 81            | 26 | 14  | y7                |                   |
|                                 |                     |              |            | 2          | 541.7           | 969.44         | 81            | 27 | 16  | y8                |                   |
|                                 | LSEPAELTDAVK        | bi0037       | 1272.7     | 2          | <b>636.8</b>    | <b>775.4</b>   | 91            | 39 | 11  | y7                |                   |
|                                 |                     |              |            | 2          | 636.8           | 846.4          | 91            | 37 | 12  | y8                |                   |
|                                 |                     |              |            | 2          | 636.8           | 943.4          | 91            | 29 | 15  | y9                |                   |
|                                 | LSEPAELTDAVK        | ni0107       | 1280.7     | 2          | <b>640.8</b>    | <b>783.43</b>  | 91            | 39 | 11  | y7                |                   |
|                                 |                     |              |            | 2          | 640.8           | 854.47         | 91            | 37 | 12  | y8                |                   |
|                                 |                     |              |            | 2          | 640.8           | 951.52         | 91            | 29 | 15  | y9                |                   |
| horseradish peroxidase (HRP)    | SSDLVALSGGHTFGK     | bi0166       | 1475.7     | 3          | <b>492.6</b>    | <b>703.35</b>  | 76            | 27 | 10  | y7                |                   |
|                                 |                     |              |            | 3          | 492.6           | 790.38         | 76            | 27 | 12  | y8                |                   |
|                                 |                     |              |            | 3          | 492.6           | 974.51         | 76            | 26 | 15  | y10               |                   |
|                                 | SSDLVALSGGHTFGK     | ni0108       | 1483.8     | 3          | <b>495.3</b>    | <b>711.37</b>  | 76            | 27 | 10  | y7                |                   |
|                                 |                     |              |            | 3          | 495.3           | 798.4          | 76            | 27 | 12  | y8                |                   |
|                                 |                     |              |            | 3          | 495.3           | 982.52         | 76            | 26 | 15  | y10               |                   |
| C-reactive protein (CRP)        | ESDTSYVSLK          | bi0231       | 1128.5     | 2          | <b>564.8</b>    | <b>609.4</b>   | 81            | 27 | 8   | y5                |                   |
|                                 |                     |              |            | 2          | 564.8           | 696.4          | 81            | 27 | 10  | y6                |                   |
|                                 |                     |              |            | 2          | 564.8           | 797.4          | 81            | 29 | 12  | y7                |                   |
|                                 | ESDTSYVSLK          | ni0109       | 1136.6     | 2          | <b>568.8</b>    | <b>617.37</b>  | 81            | 27 | 8   | y5                |                   |
|                                 |                     |              |            | 2          | 568.8           | 704.41         | 81            | 27 | 10  | y6                |                   |
|                                 |                     |              |            | 2          | 568.8           | 805.45         | 81            | 29 | 12  | y7                |                   |
|                                 | GYSIFSATK           | bi0202       | 1136.3     | 2          | <b>568.8</b>    | <b>716.4</b>   | 76            | 30 | 10  | y6                |                   |
|                                 |                     |              |            | 2          | 568.8           | 829.5          | 76            | 27 | 12  | y7                |                   |
|                                 |                     |              |            | 2          | 568.8           | 916.5          | 76            | 25 | 14  | y8                |                   |
|                                 |                     | GYSIFSATK    | ni0110     | 1144.6     | 2               | <b>572.8</b>   | <b>724.38</b> | 76 | 30  | 10                | y6                |
|                                 |                     |              |            |            | 2               | 572.8          | 837.46        | 76 | 27  | 12                | y7                |
|                                 |                     |              |            |            | 2               | 572.8          | 924.49        | 76 | 25  | 14                | y8                |
| YEYQGEVFTKQLWP                  | ni0001              | 1820.9       | 2          | <b>911</b> | <b>1053.5</b>   | 106            | 34            | 16 | b9  |                   |                   |
|                                 |                     |              | 2          | 911        | 1181.6          | 106            | 33            | 18 | b10 |                   |                   |
|                                 |                     |              | 2          | 911        | 1519.8          | 106            | 37            | 18 | b13 |                   |                   |
|                                 | YEYQGEVFTKQLWP      | ni0111       | 1826.9     | 2          | <b>914</b>      | <b>1053.49</b> | 106           | 34 | 16  | b9                |                   |
|                                 |                     |              |            | 2          | 914             | 1181.58        | 106           | 33 | 18  | b10               |                   |
|                                 |                     |              |            | 2          | 914             | 1525.8         | 106           | 37 | 18  | b13               |                   |

**4000 QTRAP at CPTAC site @56**

| MH+ (mono) | z (Q1) | MRM Transitions |                |     | DP | CE | CXP               | Fragment Ion Type |
|------------|--------|-----------------|----------------|-----|----|----|-------------------|-------------------|
|            |        | Q1              | Q3             | Q3  |    |    |                   |                   |
| 1488.7     | 2      | <b>744.8</b>    | <b>858.39</b>  | 120 | 35 | 16 | y7                |                   |
|            | 2      | 744.8           | 959.44         | 120 | 38 | 16 | y8                |                   |
|            | 2      | 744.8           | 1087.5         | 120 | 40 | 16 | y9                |                   |
| 1493.7     | 2      | <b>747.3</b>    | <b>863.41</b>  | 120 | 35 | 16 | y7                |                   |
|            | 2      | 747.3           | 964.46         | 120 | 38 | 16 | y8                |                   |
|            | 2      | 747.3           | 1092.5         | 120 | 40 | 16 | y9                |                   |
| 1399.7     | 3      | <b>467.2</b>    | <b>586.8</b>   | 61  | 20 | 12 | y11 <sup>2+</sup> |                   |
|            | 3      | 467.2           | 643.82         | 61  | 20 | 12 | y12 <sup>2+</sup> |                   |
|            | 3      | 467.2           | 720.39         | 61  | 20 | 12 | y7                |                   |
| 1407.3     | 3      | <b>469.9</b>    | <b>590.81</b>  | 61  | 20 | 12 | y11 <sup>2+</sup> |                   |
|            | 3      | 469.9           | 647.83         | 61  | 20 | 12 | y12 <sup>2+</sup> |                   |
|            | 3      | 469.9           | 728.4          | 61  | 20 | 12 | y7                |                   |
| 1271.7     | 3      | <b>424.6</b>    | <b>506.26</b>  | 66  | 18 | 12 | y9 <sup>2+</sup>  |                   |
|            | 3      | 424.6           | 579.79         | 66  | 19 | 10 | y10 <sup>2+</sup> |                   |
|            | 3      | 424.6           | 716.38         | 66  | 24 | 13 | y6                |                   |
| 1279.7     | 3      | <b>427.2</b>    | <b>510.27</b>  | 66  | 18 | 12 | y9 <sup>2+</sup>  |                   |
|            | 3      | 427.2           | 583.8          | 66  | 19 | 10 | y10 <sup>2+</sup> |                   |
|            | 3      | 427.2           | 724.4          | 66  | 24 | 13 | y6                |                   |
| 726.4      | 2      | <b>363.7</b>    | <b>385.26</b>  | 70  | 23 | 16 | y3                |                   |
|            | 2      | 363.7           | 532.32         | 70  | 22 | 16 | y4                |                   |
|            | 2      | 363.7           | 589.35         | 70  | 22 | 14 | y5                |                   |
| 732.4      | 2      | <b>366.7</b>    | <b>391.28</b>  | 70  | 23 | 16 | y3                |                   |
|            | 2      | 366.7           | 538.34         | 70  | 22 | 16 | y4                |                   |
|            | 2      | 366.7           | 595.37         | 70  | 22 | 14 | y5                |                   |
| 1322.6     | 3      | <b>441.5</b>    | <b>488.22</b>  | 61  | 20 | 14 | y9 <sup>2+</sup>  |                   |
|            | 3      | 441.5           | 523.74         | 61  | 17 | 14 | y10 <sup>2+</sup> |                   |
|            | 3      | 441.5           | 817.36         | 61  | 23 | 13 | y7                |                   |
| 1328.6     | 3      | <b>443.5</b>    | <b>491.23</b>  | 61  | 20 | 14 | y9 <sup>2+</sup>  |                   |
|            | 3      | 443.5           | 526.75         | 61  | 17 | 14 | y10 <sup>2+</sup> |                   |
|            | 3      | 443.5           | 823.38         | 61  | 23 | 13 | y7                |                   |
| 1077.5     | 2      | <b>539.3</b>    | <b>808.33</b>  | 75  | 27 | 14 | y6                |                   |
|            | 2      | 539.3           | 865.35         | 75  | 25 | 14 | y7                |                   |
|            | 2      | 539.3           | 964.42         | 75  | 27 | 16 | y8                |                   |
| 1082.5     | 2      | <b>541.7</b>    | <b>808.33</b>  | 75  | 27 | 14 | y6                |                   |
|            | 2      | 541.7           | 865.35         | 75  | 25 | 14 | y7                |                   |
|            | 2      | 541.7           | 969.44         | 75  | 27 | 16 | y8                |                   |
| 1272.7     | 2      | <b>636.8</b>    | <b>775.42</b>  | 75  | 39 | 15 | y7                |                   |
|            | 2      | 636.8           | 846.46         | 75  | 39 | 15 | y8                |                   |
|            | 2      | 636.8           | 943.51         | 75  | 31 | 15 | y9                |                   |
| 1280.7     | 2      | <b>640.8</b>    | <b>783.43</b>  | 75  | 39 | 15 | y7                |                   |
|            | 2      | 640.8           | 854.47         | 75  | 39 | 15 | y8                |                   |
|            | 2      | 640.8           | 951.52         | 75  | 31 | 15 | y9                |                   |
| 1475.7     | 3      | <b>492.6</b>    | <b>703.35</b>  | 70  | 27 | 14 | y7                |                   |
|            | 3      | 492.6           | 790.38         | 70  | 27 | 14 | y8                |                   |
|            | 3      | 492.6           | 974.51         | 70  | 24 | 16 | y10               |                   |
| 1483.8     | 3      | <b>495.3</b>    | <b>711.37</b>  | 70  | 27 | 14 | y7                |                   |
|            | 3      | 495.3           | 798.4          | 70  | 27 | 14 | y8                |                   |
|            | 3      | 495.3           | 982.52         | 70  | 24 | 16 | y10               |                   |
| 1128.5     | 2      | <b>564.8</b>    | <b>609.36</b>  | 86  | 23 | 10 | y5                |                   |
|            | 2      | 564.8           | 696.39         | 86  | 31 | 12 | y6                |                   |
|            | 2      | 564.8           | 797.44         | 81  | 31 | 14 | y7                |                   |
| 1136.6     | 2      | <b>568.8</b>    | <b>617.37</b>  | 86  | 23 | 10 | y5                |                   |
|            | 2      | 568.8           | 704.41         | 86  | 31 | 12 | y6                |                   |
|            | 2      | 568.8           | 805.45         | 81  | 31 | 14 | y7                |                   |
| 1136.3     | 2      | <b>568.8</b>    | <b>716.36</b>  | 91  | 31 | 16 | y6                |                   |
|            | 2      | 568.8           | 829.45         | 51  | 27 | 18 | y7                |                   |
|            | 2      | 568.8           | 916.48         | 71  | 25 | 16 | y8                |                   |
| 1144.6     | 2      | <b>572.8</b>    | <b>724.38</b>  | 91  | 31 | 16 | y6                |                   |
|            | 2      | 572.8           | 837.46         | 51  | 27 | 18 | y7                |                   |
|            | 2      | 572.8           | 924.49         | 71  | 25 | 16 | y8                |                   |
| 1820.9     | 2      | <b>911</b>      | <b>1053.49</b> | 80  | 35 | 25 | b9                |                   |
|            | 2      | 911             | 1181.58        | 80  | 32 | 25 | b10               |                   |
|            | 2      | 911             | 1519.78        | 80  | 36 | 25 | b13               |                   |
| 1826.9     | 2      | <b>914</b>      | <b>1053.49</b> | 80  | 35 | 25 | b9                |                   |
|            | 2      | 914             | 1181.58        | 80  | 32 | 25 | b10               |                   |
|            | 2      | 914             | 1525.8         | 80  | 36 | 25 | b13               |                   |

Footnote: Instrument Parameters for MRM transitions were optimized for maximum transmission efficiency and sensitivity for individual instruments by infusion of unlabeled signature peptides. Optimized declustering potential (DP), collision energy (CE), and collision cell exit potential (CXP) are reported for 4000 QTRAP instruments for each MRM transition along with the corresponding instrument used at each site. For the TSQ Quantum Ultra the collision energy (CE) is reported for each MRM transition. Boldface type indicates labeled peptide internal standard with labeled amino acid in red.

4000 QTRAP at CPTAC site @86

4000 QTRAP at CPTAC site @95

4000 QTRAP at CPTAC site @73

| Identifier | MH+ (mono) | z (Q1) | MRM Transitions |         | DP  | CE | CXP | Fragment Ion Type |
|------------|------------|--------|-----------------|---------|-----|----|-----|-------------------|
|            |            |        | Q1              | Q3      |     |    |     |                   |
| bi0173     | 1488.7     | 2      | 744.8           | 858.39  | 120 | 38 | 20  | y7                |
|            |            | 2      | 744.8           | 959.44  | 120 | 38 | 22  | y8                |
| bi0081     | 1493.7     | 2      | 744.8           | 1087.5  | 120 | 40 | 24  | y9                |
|            |            | 2      | 747.3           | 863.41  | 120 | 38 | 20  | y7                |
| bi0167     | 1399.7     | 2      | 747.3           | 964.46  | 120 | 38 | 22  | y8                |
|            |            | 2      | 747.3           | 1092.5  | 120 | 40 | 24  | y9                |
| ni0101     | 1407.3     | 3      | 467.2           | 586.8   | 61  | 22 | 12  | y11 <sup>2+</sup> |
|            |            | 3      | 467.2           | 643.82  | 61  | 22 | 14  | y12 <sup>2+</sup> |
| bi0171     | 1271.7     | 3      | 467.2           | 720.39  | 61  | 30 | 16  | y7                |
|            |            | 3      | 469.9           | 590.81  | 61  | 22 | 12  | y11 <sup>2+</sup> |
| ni0102     | 1279.7     | 3      | 469.9           | 647.83  | 61  | 22 | 14  | y12 <sup>2+</sup> |
|            |            | 3      | 469.9           | 728.4   | 61  | 30 | 16  | y7                |
| bi0169     | 726.4      | 3      | 424.6           | 506.26  | 66  | 18 | 10  | y9 2+             |
|            |            | 3      | 424.6           | 579.79  | 66  | 20 | 12  | y10 2+            |
| ni0104     | 732.4      | 3      | 424.6           | 716.38  | 66  | 24 | 16  | y6                |
|            |            | 3      | 427.2           | 510.27  | 66  | 18 | 10  | y9 2+             |
| bi0170     | 1322.6     | 3      | 427.2           | 583.8   | 66  | 20 | 12  | y10 2+            |
|            |            | 3      | 427.2           | 724.4   | 66  | 24 | 16  | y6                |
| ni0105     | 1328.6     | 2      | 363.7           | 385.26  | 70  | 22 | 16  | y3                |
|            |            | 2      | 363.7           | 532.32  | 70  | 22 | 16  | y4                |
| bi0161     | 1077.5     | 2      | 363.7           | 589.35  | 70  | 23 | 11  | y5                |
|            |            | 2      | 366.7           | 391.28  | 70  | 22 | 16  | y3                |
| bi0067     | 1082.5     | 2      | 366.7           | 538.34  | 70  | 22 | 16  | y4                |
|            |            | 2      | 366.7           | 595.37  | 70  | 23 | 11  | y5                |
| ni0107     | 1280.7     | 3      | 441.5           | 488.22  | 65  | 21 | 9   | y9 2+             |
|            |            | 3      | 441.5           | 523.74  | 65  | 19 | 10  | y10 2+            |
| bi0166     | 1475.7     | 3      | 441.5           | 817.36  | 61  | 26 | 18  | y7                |
|            |            | 3      | 443.5           | 491.23  | 65  | 21 | 9   | y9 2+             |
| ni0108     | 1483.8     | 3      | 443.5           | 526.75  | 65  | 19 | 10  | y10 2+            |
|            |            | 3      | 443.5           | 823.38  | 61  | 26 | 18  | y7                |
| bi0231     | 1128.5     | 2      | 539.3           | 808.33  | 75  | 27 | 20  | y6                |
|            |            | 2      | 539.3           | 865.35  | 75  | 25 | 20  | y7                |
| ni0109     | 1136.6     | 2      | 539.3           | 964.42  | 75  | 28 | 22  | y8                |
|            |            | 2      | 541.7           | 808.33  | 75  | 27 | 20  | y6                |
| bi0202     | 1136.3     | 2      | 541.7           | 865.35  | 75  | 25 | 20  | y7                |
|            |            | 2      | 541.7           | 969.44  | 75  | 28 | 22  | y8                |
| ni0110     | 1144.6     | 2      | 636.8           | 775.42  | 75  | 37 | 18  | y7                |
|            |            | 2      | 636.8           | 846.46  | 75  | 38 | 20  | y8                |
| ni0001     | 1820.9     | 2      | 636.8           | 943.51  | 75  | 30 | 22  | y9                |
|            |            | 2      | 640.8           | 783.43  | 75  | 37 | 18  | y7                |
| ni0111     | 1826.9     | 2      | 640.8           | 854.47  | 75  | 38 | 20  | y8                |
|            |            | 2      | 640.8           | 951.52  | 75  | 30 | 22  | y9                |
|            | 1826.9     | 3      | 492.6           | 703.35  | 70  | 26 | 16  | y7                |
|            |            | 3      | 492.6           | 790.38  | 70  | 26 | 17  | y8                |
|            | 1826.9     | 3      | 492.6           | 974.51  | 70  | 26 | 24  | y10               |
|            |            | 3      | 495.3           | 711.37  | 70  | 26 | 16  | y7                |
|            | 1826.9     | 3      | 495.3           | 798.4   | 70  | 26 | 17  | y8                |
|            |            | 3      | 495.3           | 982.52  | 70  | 26 | 24  | y10               |
|            | 1826.9     | 2      | 564.8           | 609.36  | 70  | 26 | 12  | y5                |
|            |            | 2      | 564.8           | 696.39  | 70  | 29 | 16  | y6                |
|            | 1826.9     | 2      | 564.8           | 797.44  | 70  | 28 | 20  | y7                |
|            |            | 2      | 568.8           | 617.37  | 70  | 26 | 12  | y5                |
|            | 1826.9     | 2      | 568.8           | 704.41  | 70  | 29 | 16  | y6                |
|            |            | 2      | 568.8           | 805.45  | 70  | 28 | 20  | y7                |
|            | 1826.9     | 2      | 568.8           | 716.36  | 70  | 26 | 20  | y6                |
|            |            | 2      | 568.8           | 829.45  | 70  | 26 | 20  | y7                |
|            | 1826.9     | 2      | 568.8           | 916.48  | 70  | 25 | 22  | y8                |
|            |            | 2      | 572.8           | 724.38  | 70  | 26 | 20  | y6                |
|            | 1826.9     | 2      | 572.8           | 837.46  | 70  | 26 | 20  | y7                |
|            |            | 2      | 572.8           | 924.49  | 70  | 25 | 22  | y8                |
|            | 1826.9     | 2      | 911             | 1053.49 | 85  | 39 | 24  | b9                |
|            |            | 2      | 911             | 1181.58 | 85  | 40 | 32  | b10               |
|            | 1826.9     | 2      | 911             | 1519.78 | 85  | 38 | 38  | b13               |
|            |            | 2      | 914             | 1053.49 | 85  | 39 | 24  | b9                |
|            | 1826.9     | 2      | 914             | 1181.58 | 85  | 40 | 32  | b10               |
|            |            | 2      | 914             | 1525.8  | 85  | 38 | 38  | b13               |

| MH+ (mono) | z (Q1) | MRM Transitions |        | DP      | CE | CXP | Fragment Ion Type |     |
|------------|--------|-----------------|--------|---------|----|-----|-------------------|-----|
|            |        | Q1              | Q3     |         |    |     |                   |     |
| 1488.7     | 2      | 744.8           | 858.39 | 76      | 41 | 29  | y7                |     |
|            | 2      | 744.8           | 959.44 | 84      | 45 | 17  | y8                |     |
| 1493.7     | 2      | 744.8           | 1087.5 | 76      | 42 | 20  | y9                |     |
|            | 2      | 747.3           | 863.41 | 76      | 41 | 29  | y7                |     |
| 1399.7     | 2      | 747.3           | 964.46 | 84      | 45 | 17  | y8                |     |
|            | 2      | 747.3           | 1092.5 | 76      | 42 | 20  | y9                |     |
| 1407.3     | 3      | 467.2           | 586.8  | 59      | 26 | 19  | y11 <sup>2+</sup> |     |
|            | 3      | 467.2           | 643.82 | 56      | 29 | 21  | y12 <sup>2+</sup> |     |
| 1271.7     | 3      | 467.2           | 720.39 | 58      | 31 | 20  | y7                |     |
|            | 3      | 469.9           | 590.81 | 59      | 26 | 19  | y11 <sup>2+</sup> |     |
| 1279.7     | 3      | 469.9           | 647.83 | 56      | 29 | 21  | y12 <sup>2+</sup> |     |
|            | 3      | 469.9           | 728.4  | 58      | 31 | 20  | y7                |     |
| 726.4      | 3      | 424.6           | 506.26 | 64      | 23 | 16  | y9 <sup>2+</sup>  |     |
|            | 3      | 424.6           | 579.79 | 54      | 26 | 10  | y10 <sup>2+</sup> |     |
| 732.4      | 3      | 424.6           | 716.38 | 56      | 25 | 19  | y6                |     |
|            | 3      | 427.2           | 510.27 | 64      | 23 | 16  | y9 <sup>2+</sup>  |     |
| 1322.6     | 3      | 427.2           | 583.8  | 54      | 26 | 10  | y10 <sup>2+</sup> |     |
|            | 3      | 427.2           | 724.4  | 56      | 25 | 19  | y6                |     |
| 1077.5     | 2      | 363.7           | 385.26 | 61      | 27 | 12  | y3                |     |
|            | 2      | 363.7           | 532.32 | 64      | 27 | 17  | y4                |     |
| 1328.6     | 2      | 363.7           | 589.35 | 69      | 26 | 19  | y5                |     |
|            | 2      | 366.7           | 391.28 | 61      | 27 | 12  | y3                |     |
| 1077.5     | 2      | 366.7           | 538.34 | 64      | 27 | 17  | y4                |     |
|            | 2      | 366.7           | 595.37 | 69      | 26 | 19  | y5                |     |
| 1322.6     | 3      | 441.5           | 488.22 | 51      | 23 | 15  | y9 <sup>2+</sup>  |     |
|            | 3      | 441.5           | 523.74 | 54      | 19 | 17  | y10 <sup>2+</sup> |     |
| 1328.6     | 3      | 441.5           | 817.36 | 51      | 28 | 15  | y7                |     |
|            | 3      | 443.5           | 491.23 | 51      | 23 | 15  | y9 <sup>2+</sup>  |     |
| 1077.5     | 3      | 443.5           | 526.75 | 54      | 19 | 17  | y10 <sup>2+</sup> |     |
|            | 3      | 443.5           | 823.38 | 51      | 28 | 15  | y7                |     |
| 1082.5     | 2      | 539.3           | 808.33 | 64      | 29 | 21  | y6                |     |
|            | 2      | 539.3           | 865.35 | 66      | 29 | 16  | y7                |     |
| 1272.7     | 2      | 539.3           | 964.42 | 61      | 29 | 18  | y8                |     |
|            | 2      | 541.7           | 808.33 | 64      | 29 | 21  | y6                |     |
| 1280.7     | 2      | 541.7           | 865.35 | 66      | 29 | 16  | y7                |     |
|            | 2      | 541.7           | 969.44 | 61      | 29 | 18  | y8                |     |
| 1475.7     | 2      | 636.8           | 775.42 | 74      | 40 | 19  | y7                |     |
|            | 2      | 636.8           | 846.46 | 71      | 48 | 14  | y8                |     |
| 1483.8     | 2      | 636.8           | 943.51 | 79      | 33 | 17  | y9                |     |
|            | 2      | 640.8           | 783.43 | 74      | 40 | 19  | y7                |     |
| 1128.5     | 2      | 640.8           | 854.47 | 71      | 48 | 14  | y8                |     |
|            | 2      | 640.8           | 951.52 | 79      | 33 | 17  | y9                |     |
| 1136.6     | 3      | 492.6           | 703.35 | 64      | 29 | 18  | y7                |     |
|            | 3      | 492.6           | 790.38 | 59      | 32 | 20  | y8                |     |
| 1144.6     | 3      | 492.6           | 974.51 | 54      | 28 | 17  | y10               |     |
|            | 3      | 495.3           | 711.37 | 64      | 29 | 18  | y7                |     |
| 1820.9     | 3      | 495.3           | 798.4  | 59      | 32 | 20  | y8                |     |
|            | 3      | 495.3           | 982.52 | 54      | 28 | 17  | y10               |     |
| 1826.9     | 2      | 564.8           | 609.36 | 64      | 27 | 19  | y5                |     |
|            | 2      | 564.8           | 696.39 | 61      | 29 | 23  | y6                |     |
| 1826.9     | 2      | 564.8           | 797.44 | 56      | 30 | 19  | y7                |     |
|            | 2      | 568.8           | 617.37 | 64      | 27 | 19  | y5                |     |
|            | 1826.9 | 2               | 568.8  | 704.41  | 61 | 29  | 23                | y6  |
|            |        | 2               | 568.8  | 805.45  | 56 | 30  | 19                | y7  |
|            | 1826.9 | 2               | 568.8  | 716.36  | 61 | 27  | 24                | y6  |
|            |        | 2               | 568.8  | 829.45  | 59 | 29  | 22                | y7  |
|            | 1826.9 | 2               | 568.8  | 916.48  | 59 | 28  | 16                | y8  |
|            |        | 2               | 572.8  | 724.38  | 61 | 27  | 24                | y6  |
|            | 1826.9 | 2               | 572.8  | 837.46  | 59 | 29  | 22                | y7  |
|            |        | 2               | 572.8  | 924.49  | 59 | 28  | 16                | y8  |
|            | 1826.9 | 2               | 911    | 1053.49 | 96 | 39  | 19                | b9  |
|            |        | 2               | 911    | 1181.58 | 81 | 36  | 22                | b10 |
|            | 1826.9 | 2               | 911    | 1519.78 | 76 | 37  | 29                | b13 |
|            |        | 2               | 914    | 1053.49 | 96 | 39  | 19                | b9  |
|            | 1826.9 | 2               | 914    | 1181.58 | 81 | 36  | 22                | b10 |
|            |        | 2               | 914    | 1525.8  | 85 | 37  | 29                | b13 |

| MH+ (mono) | z (Q1) | MRM Transitions |        | DP  | CE | CXP | Fragment Ion Type |
|------------|--------|-----------------|--------|-----|----|-----|-------------------|
|            |        | Q1              | Q3     |     |    |     |                   |
| 1488.7     | 2      | 744.8           | 858.4  | 105 | 40 | 13  | y7                |
|            | 2      | 744.8           | 959.4  | 105 | 39 | 13  | y8                |
| 1493.7     | 2      | 744.8           | 1087.5 | 105 | 39 | 13  | y9                |
|            | 2      | 747.3           | 863.4  | 105 | 40 | 13  | y7                |
| 1399.7     | 2      | 747.3           | 964.4  | 105 | 39 | 13  | y8                |
|            | 2      | 747.3           | 1092.5 | 105 | 39 | 13  | y9                |
| 1407.3     | 3      | 467.2           | 586.8  | 65  | 22 | 21  | y11 <sup>2+</sup> |
|            | 3      | 467.2           | 643.82 | 65  | 22 | 11  | y12 <sup>2+</sup> |
| 1271.7     | 3      | 467.2           | 720.39 | 65  | 28 | 18  | y7                |
|            | 3      | 469.9           | 590.81 | 65  | 22 | 21  | y11 <sup>2+</sup> |
| 1279.7     | 3      | 469.9           | 647.83 | 65  | 22 | 11  | y12 <sup>2+</sup> |
|            | 3      | 469.9           | 728.4  | 65  | 28 | 18  | y7                |
| 726.4      | 3      | 424.6           | 506.3  | 65  | 19 | 23  | y9 <sup>2+</sup>  |
|            | 3      | 424.6           | 579.8  | 65  | 19 | 14  | y10 <sup>2+</sup> |
| 732.4      | 3      | 424.6           | 716.4  | 65  | 23 | 14  | y6                |
|            | 3      | 427.2           | 510.27 | 65  | 19 | 23  | y9 <sup>2+</sup>  |
| 1322.6     | 3      | 427.2           | 583.8  | 65  | 19 | 14  | y10 <sup>2+</sup> |
|            | 3      | 427.2           | 724.4  | 65  | 23 | 14  | y6                |
| 1077.5     | 2      | 363.7           | 385.3  | 70  | 23 | 19  | y3                |
|            | 2      | 363.7           | 532.3  | 70  | 22 | 19  | y4                |
| 1328.6     | 2      | 363.7           | 589.4  | 70  | 23 | 12  | y5                |
|            | 2      | 366.7           | 391.3  | 70  | 23 | 19  | y3                |
| 1077.5     | 2      | 366.7           | 538.3  | 70  | 22 | 19  | y4                |
|            | 2      | 366.7           | 595.4  | 70  | 23 | 12  | y5                |
| 1322.6     | 3      | 441.5           | 488.2  | 60  | 21 | 13  | y9 <sup>2+</sup>  |
|            | 3      | 441.5           | 523.7  | 60  | 19 | 14  | y10 <sup>2+</sup> |
| 1328.6     | 3      | 441.5           | 817.4  | 60  | 24 | 14  | y7                |
|            | 3      | 443.5           | 491.23 | 60  | 21 | 13  | y9 <sup>2+</sup>  |
| 1077.5     | 3      | 443.5           | 526.75 | 60  | 19 | 14  | y10 <sup>2+</sup> |
|            | 3      | 443.5           | 823.38 | 60  | 24 | 14  | y7                |
| 1082.5     | 2      | 539.3           | 808.3  | 70  | 27 | 13  | y6                |
|            | 2      | 539.3           | 865.4  | 70  | 26 | 13  | y7                |
| 1272.7     | 2      | 539.3           | 964.42 | 70  | 27 | 14  | y8                |
|            | 2      | 541.7           | 808.33 | 70  | 27 | 13  | y6                |
| 1280.7     | 2      | 541.7           | 865.35 | 70  | 26 | 13  | y7                |
|            | 2      | 541.7           | 969.44 | 70  | 27 | 14  | y8                |
| 1475.7     |        |                 |        |     |    |     |                   |

| Identifier | MH+ (mono) | z (Q1) | MRM Transitions |        | DP  | CE | CXP | Fragment Ion Type |
|------------|------------|--------|-----------------|--------|-----|----|-----|-------------------|
|            |            |        | Q1              | Q3     |     |    |     |                   |
|            |            |        | Q1              | Q3     |     |    |     |                   |
| bi0173     | 1488.7     | 2      | 744.8           | 858.40 | 120 | 38 | 23  | y7                |
|            |            |        | 744.8           | 959.4  | 120 | 37 | 23  | y8                |
|            |            |        | 744.8           | 1087.5 | 120 | 44 | 23  | y9                |
| bi0081     | 1493.7     | 2      | 747.3           | 863.4  | 120 | 38 | 23  | y7                |
|            |            |        | 747.3           | 964.4  | 120 | 37 | 23  | y8                |
|            |            |        | 747.3           | 1092.5 | 120 | 44 | 23  | y9                |
| bi0167     | 1399.7     | 3      | 467.2           | 586.8  | 65  | 20 | 23  | y11 <sup>2+</sup> |
|            |            |        | 467.2           | 643.8  | 65  | 21 | 23  | y12 <sup>2+</sup> |
|            |            |        | 467.2           | 720.4  | 65  | 27 | 23  | y7                |
| ni0101     | 1407.3     | 3      | 469.9           | 590.8  | 65  | 20 | 23  | y11 <sup>2+</sup> |
|            |            |        | 469.9           | 647.8  | 65  | 21 | 23  | y12 <sup>2+</sup> |
|            |            |        | 469.9           | 728.4  | 65  | 27 | 23  | y7                |
| bi0171     | 1271.7     | 3      | 424.6           | 506.3  | 65  | 18 | 23  | y9 <sup>2+</sup>  |
|            |            |        | 424.6           | 579.8  | 65  | 19 | 23  | y10 <sup>2+</sup> |
|            |            |        | 424.6           | 716.4  | 65  | 24 | 23  | y6                |
| ni0102     | 1279.7     | 3      | 427.2           | 510.3  | 65  | 18 | 23  | y9 <sup>2+</sup>  |
|            |            |        | 427.2           | 583.8  | 65  | 19 | 23  | y10 <sup>2+</sup> |
|            |            |        | 427.2           | 724.4  | 65  | 24 | 23  | y6                |
| bi0169     | 726.4      | 2      | 363.7           | 385.3  | 70  | 23 | 23  | y3                |
|            |            |        | 363.7           | 532.3  | 70  | 22 | 23  | y4                |
|            |            |        | 363.7           | 589.4  | 70  | 22 | 23  | y5                |
| ni0104     | 732.4      | 2      | 366.7           | 391.3  | 70  | 23 | 23  | y3                |
|            |            |        | 366.7           | 538.3  | 70  | 22 | 23  | y4                |
|            |            |        | 366.7           | 595.4  | 70  | 22 | 23  | y5                |
| bi0170     | 1322.6     | 3      | 441.5           | 488.2  | 48  | 20 | 23  | y9 <sup>2+</sup>  |
|            |            |        | 441.5           | 523.7  | 48  | 19 | 23  | y10 <sup>2+</sup> |
|            |            |        | 441.5           | 817.4  | 48  | 25 | 23  | y7                |
| ni0105     | 1328.6     | 3      | 443.5           | 491.2  | 48  | 20 | 23  | y9 <sup>2+</sup>  |
|            |            |        | 443.5           | 526.7  | 48  | 19 | 23  | y10 <sup>2+</sup> |
|            |            |        | 443.5           | 823.4  | 48  | 25 | 23  | y7                |
| bi0161     | 1077.5     | 2      | 539.3           | 808.3  | 65  | 25 | 23  | y6                |
|            |            |        | 539.3           | 865.4  | 65  | 25 | 23  | y7                |
|            |            |        | 539.3           | 964.4  | 65  | 27 | 23  | y8                |
| bi0067     | 1082.5     | 2      | 541.7           | 808.3  | 65  | 25 | 23  | y6                |
|            |            |        | 541.7           | 865.4  | 65  | 25 | 23  | y7                |
|            |            |        | 541.7           | 969.4  | 65  | 27 | 23  | y8                |
| bi0037     | 1272.7     | 2      | 636.8           | 775.4  | 80  | 35 | 23  | y7                |
|            |            |        | 636.8           | 846.4  | 80  | 35 | 23  | y8                |
|            |            |        | 636.8           | 943.4  | 80  | 27 | 23  | y9                |
| ni0107     | 1280.7     | 2      | 640.8           | 783.4  | 80  | 35 | 23  | y7                |
|            |            |        | 640.8           | 854.5  | 80  | 35 | 23  | y8                |
|            |            |        | 640.8           | 951.5  | 80  | 27 | 23  | y9                |
| bi0166     | 1475.7     | 3      | 492.6           | 703.35 | 60  | 27 | 23  | y7                |
|            |            |        | 492.6           | 790.38 | 60  | 27 | 23  | y8                |
|            |            |        | 492.6           | 974.51 | 60  | 26 | 23  | y10               |
| ni0108     | 1483.8     | 3      | 495.3           | 711.4  | 60  | 27 | 23  | y7                |
|            |            |        | 495.3           | 798.4  | 60  | 27 | 23  | y8                |
|            |            |        | 495.3           | 982.5  | 60  | 26 | 23  | y10               |
| bi0231     | 1128.5     | 2      | 564.8           | 609.4  | 70  | 27 | 23  | y5                |
|            |            |        | 564.8           | 696.4  | 70  | 27 | 23  | y6                |
|            |            |        | 564.8           | 797.4  | 70  | 28 | 23  | y7                |
| ni0109     | 1136.6     | 2      | 568.8           | 617.4  | 70  | 27 | 23  | y5                |
|            |            |        | 568.8           | 704.4  | 70  | 27 | 23  | y6                |
|            |            |        | 568.8           | 805.5  | 70  | 28 | 23  | y7                |
| bi0202     | 1136.3     | 2      | 568.8           | 716.4  | 62  | 26 | 23  | y6                |
|            |            |        | 568.8           | 829.5  | 62  | 26 | 23  | y7                |
|            |            |        | 568.8           | 916.5  | 62  | 25 | 23  | y8                |
| ni0110     | 1144.6     | 2      | 572.8           | 724.4  | 62  | 26 | 23  | y6                |
|            |            |        | 572.8           | 837.5  | 62  | 26 | 23  | y7                |
|            |            |        | 572.8           | 924.5  | 62  | 25 | 23  | y8                |
| ni0001     | 1820.9     | 2      | 911             | 1053.5 | 80  | 35 | 23  | b9                |
|            |            |        | 911             | 1181.6 | 80  | 33 | 23  | b10               |
|            |            |        | 911             | 1519.8 | 80  | 35 | 23  | b13               |
| ni0111     | 1826.9     | 2      | 914             | 1053.5 | 80  | 35 | 23  | b9                |
|            |            |        | 914             | 1181.6 | 80  | 33 | 23  | b10               |
|            |            |        | 914             | 1525.8 | 80  | 35 | 23  | b13               |

| MH+ (mono) | z (Q1) | MRM Transitions |         | DP  | CE | CXP | Fragment Ion Type |
|------------|--------|-----------------|---------|-----|----|-----|-------------------|
|            |        | Q1              | Q3      |     |    |     |                   |
|            |        | Q1              | Q3      |     |    |     |                   |
| 1488.7     | 2      | 744.8           | 858.4   | 111 | 43 | 14  | y7                |
|            |        | 744.8           | 959.4   | 111 | 41 | 6   | y8                |
|            |        | 744.8           | 1087.5  | 111 | 39 | 10  | y9                |
| 1493.7     | 2      | 747.3           | 863.4   | 111 | 43 | 14  | y7                |
|            |        | 747.3           | 964.4   | 111 | 41 | 6   | y8                |
|            |        | 747.3           | 1092.5  | 111 | 39 | 10  | y9                |
| 1399.7     | 3      | 467.2           | 586.8   | 81  | 23 | 10  | y11 <sup>2+</sup> |
|            |        | 467.2           | 643.8   | 81  | 29 | 12  | y12 <sup>2+</sup> |
|            |        | 467.2           | 720.39  | 81  | 27 | 8   | y7                |
| 1407.3     | 3      | 469.9           | 590.81  | 81  | 23 | 10  | y11 <sup>2+</sup> |
|            |        | 469.9           | 647.83  | 81  | 29 | 12  | y12 <sup>2+</sup> |
|            |        | 469.9           | 728.4   | 81  | 27 | 8   | y7                |
| 1271.7     | 3      | 424.6           | 506.3   | 80  | 19 | 8   | y9 <sup>2+</sup>  |
|            |        | 424.6           | 579.8   | 80  | 21 | 8   | y10 <sup>2+</sup> |
|            |        | 424.6           | 716.4   | 80  | 25 | 12  | y6                |
| 1279.7     | 3      | 427.2           | 510.27  | 80  | 19 | 8   | y9 <sup>2+</sup>  |
|            |        | 427.2           | 583.8   | 80  | 21 | 8   | y10 <sup>2+</sup> |
|            |        | 427.2           | 724.4   | 80  | 25 | 12  | y6                |
| 726.4      | 2      | 363.7           | 385.3   | 82  | 29 | 12  | y3                |
|            |        | 363.7           | 532.3   | 82  | 23 | 8   | y4                |
|            |        | 363.7           | 589.4   | 82  | 23 | 10  | y5                |
| 732.4      | 2      | 366.7           | 391.3   | 82  | 29 | 12  | y3                |
|            |        | 366.7           | 538.3   | 82  | 23 | 8   | y4                |
|            |        | 366.7           | 595.4   | 82  | 23 | 10  | y5                |
| 1322.6     | 3      | 441.5           | 488.2   | 76  | 25 | 6   | y9 <sup>2+</sup>  |
|            |        | 441.5           | 523.7   | 76  | 19 | 8   | y10 <sup>2+</sup> |
|            |        | 441.5           | 817.4   | 76  | 27 | 14  | y7                |
| 1328.6     | 3      | 443.5           | 491.23  | 76  | 25 | 6   | y9 <sup>2+</sup>  |
|            |        | 443.5           | 526.75  | 76  | 19 | 8   | y10 <sup>2+</sup> |
|            |        | 443.5           | 823.38  | 76  | 27 | 14  | y7                |
| 1077.5     | 2      | 539.3           | 808.3   | 81  | 37 | 12  | y6                |
|            |        | 539.3           | 865.4   | 81  | 25 | 14  | y7                |
|            |        | 539.3           | 964.42  | 81  | 27 | 16  | y8                |
| 1082.5     | 2      | 541.7           | 808.33  | 81  | 37 | 12  | y6                |
|            |        | 541.7           | 865.35  | 81  | 25 | 14  | y7                |
|            |        | 541.7           | 969.44  | 81  | 27 | 16  | y8                |
| 1272.7     | 2      | 636.8           | 775.4   | 111 | 41 | 12  | y7                |
|            |        | 636.8           | 846.4   | 111 | 39 | 14  | y8                |
|            |        | 636.8           | 943.4   | 111 | 31 | 6   | y9                |
| 1280.7     | 2      | 640.8           | 783.43  | 111 | 41 | 12  | y7                |
|            |        | 640.8           | 854.47  | 111 | 39 | 14  | y8                |
|            |        | 640.8           | 951.52  | 111 | 31 | 6   | y9                |
| 1475.7     | 3      | 492.6           | 703.35  | 81  | 27 | 12  | y7                |
|            |        | 492.6           | 790.38  | 81  | 27 | 14  | y8                |
|            |        | 492.6           | 974.51  | 81  | 25 | 10  | y10               |
| 1483.8     | 3      | 495.3           | 711.37  | 81  | 27 | 12  | y7                |
|            |        | 495.3           | 798.4   | 81  | 27 | 14  | y8                |
|            |        | 495.3           | 982.52  | 81  | 25 | 10  | y10               |
| 1128.5     | 2      | 564.8           | 609.4   | 86  | 27 | 8   | y5                |
|            |        | 564.8           | 696.4   | 86  | 27 | 12  | y6                |
|            |        | 564.8           | 797.4   | 86  | 31 | 12  | y7                |
| 1136.6     | 2      | 568.8           | 617.37  | 86  | 27 | 8   | y5                |
|            |        | 568.8           | 704.41  | 86  | 27 | 12  | y6                |
|            |        | 568.8           | 805.45  | 86  | 31 | 12  | y7                |
| 1136.3     | 2      | 568.8           | 716.4   | 81  | 37 | 12  | y6                |
|            |        | 568.8           | 829.5   | 81  | 27 | 12  | y7                |
|            |        | 568.8           | 916.5   | 81  | 25 | 8   | y8                |
| 1144.6     | 2      | 572.8           | 724.38  | 81  | 37 | 12  | y6                |
|            |        | 572.8           | 837.46  | 81  | 27 | 12  | y7                |
|            |        | 572.8           | 924.49  | 81  | 25 | 8   | y8                |
| 1820.9     | 2      | 911             | 1053.5  | 106 | 33 | 16  | b9                |
|            |        | 911             | 1181.6  | 106 | 31 | 16  | b10               |
|            |        | 911             | 1519.8  | 106 | 35 | 16  | b13               |
| 1826.9     | 2      | 914             | 1053.49 | 106 | 33 | 16  | b9                |
|            |        | 914             | 1181.58 | 106 | 31 | 16  | b10               |
|            |        | 914             | 1525.8  | 106 | 35 | 16  | b13               |

| MH+ (mono) | z (Q1) | MRM Transitions |         | CE | Fragment Ion Type |
|------------|--------|-----------------|---------|----|-------------------|
|            |        | Q1              | Q3      |    |                   |
|            |        | Q1              | Q3      |    |                   |
| 1488.7     | 2      | 744.8           | 711.23  | 30 | y6                |
|            |        | 744.8           | 858.39  | 30 | y7                |
|            |        | 744.8           | 959.44  | 30 | y8                |
| 1493.7     | 2      | 747.3           | 716.53  | 30 | y6                |
|            |        | 747.3           | 863.41  | 30 | y7                |
|            |        | 747.3           | 946.46  | 30 | y8                |
| 1399.7     | 3      | 467.2           | 586.8   | 20 | y11 <sup>2+</sup> |
|            |        | 467.2           | 643.82  | 20 | y12 <sup>2+</sup> |
|            |        | 467.2           | 720.39  | 20 | y7                |
| 1407.3     | 3      | 469.9           | 590.81  | 20 | y11 <sup>2+</sup> |
|            |        | 469.9           | 647.83  | 20 | y12 <sup>2+</sup> |
|            |        | 469.9           | 728.4   | 20 | y7                |
| 1271.7     | 3      | 424.6           | 506.26  | 18 | y9 <sup>2+</sup>  |
|            |        | 424.6           | 579.79  | 18 | y10 <sup>2+</sup> |
|            |        | 424.6           | 716.38  | 18 | y6                |
| 1279.7     | 3      | 427.2           | 510.27  | 18 | y9 <sup>2+</sup>  |
|            |        | 427.2           | 583.8   | 18 | y10 <sup>2+</sup> |
|            |        | 427.2           | 724.4   | 18 | y6                |
| 726.4      | 2      | 363.7           | 455.24  | 20 | b4                |
|            |        | 363.7           | 532.32  | 20 | y4                |
|            |        | 363.7           | 589.35  | 20 | y5                |
| 732.4      | 2      | 366.7           | 455.24  | 20 | b4                |
|            |        | 366.7           | 538.34  | 20 | y4                |
|            |        | 366.7           | 595.37  | 20 | y5                |
| 1322.6     | 3      | 441.5           | 523.74  | 18 | y10 <sup>2+</sup> |
|            |        | 441.5           | 730.33  | 18 | y6                |
|            |        | 441.5           | 817.36  | 18 | y7                |
| 1328.6     | 3      | 443.5           | 526.75  | 18 | y10 <sup>2+</sup> |
|            |        | 443.5           | 736.35  | 18 | y6                |
|            |        | 443.5           | 823.38  | 18 | y7                |
| 1077.5     | 2      | 539.3           | 808.33  | 26 | y6                |
|            |        | 539.3           | 865.35  | 26 | y7                |
|            |        | 539.3           | 964.42  | 26 | y8                |
| 1082.5     | 2      | 541.7           | 808.33  | 26 | y6                |
|            |        | 541.7           | 865.35  | 26 | y7                |
|            |        | 541.7           | 969.44  | 26 | y8                |
| 1272.7     | 2      | 636.8           | 646.38  | 29 | y6                |
|            |        | 636.8           | 846.46  | 29 | y8                |
|            |        | 636.8           | 943.51  | 29 | y9                |
| 1280.7     | 2      | 640.8           | 654.39  | 29 | y6                |
|            |        | 640.8           | 854.47  | 29 | y8                |
|            |        | 640.8           | 951.52  | 29 | y9                |
| 1475.7     | 3      | 492.6           | 703.35  | 18 | y7                |
|            |        | 492.6           | 790.38  | 18 | y8                |
|            |        | 492.6           | 974.51  | 18 | y10               |
| 1483.8     | 3      | 495.3           | 711.37  | 18 | y7                |
|            |        | 495.3           | 798.4   | 18 | y8                |
|            |        | 495.3           | 982.52  | 18 | y10               |
| 1128.5     | 2      | 564.8           | 609.36  | 22 | y5                |
|            |        | 564.8           | 696.39  | 22 | y6                |
|            |        | 564.8           | 797.44  | 22 | y7                |
| 1136.6     | 2      | 568.8           | 617.37  | 22 | y5                |
|            |        | 568.8           | 704.41  | 22 | y6                |
|            |        | 568.8           | 805.45  | 22 | y7                |
| 1136.3     | 2      | 568.8           | 716.36  | 23 | y6                |
|            |        | 568.8           | 829.45  | 23 | y7                |
|            |        | 568.8           | 916.48  | 23 | y8                |
| 1144.6     | 2      | 572.8           | 724.38  | 23 | y6                |
|            |        | 572.8           | 837.46  | 23 | y7                |
|            |        | 572.8           | 924.49  | 23 | y8                |
| 1820.9     | 2      | 911             | 805.37  | 28 | b7                |
|            |        | 911             | 1016.56 | 28 | y8                |
|            |        | 911             | 1053.49 | 30 | b9                |
| 1826.9     | 2      | 914             | 805.37  | 28 | b7                |
|            |        | 914             | 1022.58 | 28 | y8                |
|            |        | 914             | 1053.49 | 30 | b9                |

Footnote: Instrument Parameters for MRM transitions were optimized for max. transmission efficiency and sensitivity for individual instruments by infusion of unlabeled signature peptides. Optimized declustering potential (DP), collision energy (CE), and collision cell exit potential (CXP) are reported for 4000 QTRAP instruments for each MRM transition along with the corresponding instrument used at each site. For the TSQ Quantum Ultra the collision energy (CE) is reported for each MRM transition.

**Supplementary Table 1C: Comparisons of specific Instrument Parameter Declustering Potential (DP) for all MRM Transitions from seven CPTAC sites with 4000 QTRAP instruments.**

## MRM Transition DP Value comparison

| Protein                         | Signature Peptide   | Identifier   | MH+ (mono) | z (Q1) | MRM Transitions |        | Fragment Ion Type | DP                | DP  | DP  | DP | DP  | DP  | DP             | DP                  | Q1/Q3 transition    | range of DP         | mean of DP    | std. dev. of DP | std. dev. of DP (in %) |
|---------------------------------|---------------------|--------------|------------|--------|-----------------|--------|-------------------|-------------------|-----|-----|----|-----|-----|----------------|---------------------|---------------------|---------------------|---------------|-----------------|------------------------|
|                                 |                     |              |            |        | Q1              | Q3     |                   |                   |     |     |    |     |     |                |                     |                     |                     |               |                 |                        |
| aprotinin (APR)                 | AGLCamcQTFVYGCCamcR | bi0173       | 1488.7     | 2      | 744.8           | 858.4  | y7                | 100               | 120 | 120 | 76 | 105 | 120 | 111            | 744.8 / 858.4       | Range: 76.0 - 120.0 | Mean: 107.43        | StdDev: 16.0  | 14.9%           |                        |
|                                 |                     |              |            | 2      | 744.8           | 959.4  | y8                | 100               | 120 | 120 | 84 | 105 | 120 | 111            | 744.8 / 959.4       | Range: 84.0 - 120.0 | Mean: 108.57        | StdDev: 13.46 | 12.4%           |                        |
|                                 |                     |              |            | 2      | 744.8           | 1087.5 | y9                | 100               | 120 | 120 | 76 | 105 | 120 | 111            | 744.8 / 1087.5      | Range: 76.0 - 120.0 | Mean: 107.43        | StdDev: 16.0  | 14.9%           |                        |
|                                 | AGLCamcQTFVYGCCamcR | bi0081       | 1493.7     | 2      | 747.3           | 863.4  | y7                | 100               | 120 | 120 | 76 | 105 | 120 | 111            | 747.3 / 863.4       | Range: 76.0 - 120.0 | Mean: 107.43        | StdDev: 16.0  | 14.9%           |                        |
|                                 |                     |              |            | 2      | 747.3           | 964.4  | y8                | 100               | 120 | 120 | 84 | 105 | 120 | 111            | 747.3 / 964.4       | Range: 84.0 - 120.0 | Mean: 108.57        | StdDev: 13.46 | 12.4%           |                        |
|                                 |                     |              |            | 2      | 747.3           | 1092.5 | y9                | 100               | 120 | 120 | 76 | 105 | 120 | 111            | 747.3 / 1092.5      | Range: 76.0 - 120.0 | Mean: 107.43        | StdDev: 16.0  | 14.9%           |                        |
| leptin (LEP)                    | INDISHTQVSASAK      | bi0167       | 1399.7     | 3      | 467.2           | 586.8  | y11 <sup>2+</sup> | 76                | 61  | 61  | 59 | 65  | 65  | 81             | 467.2 / 586.8       | Range: 59.0 - 81.0  | Mean: 66.86         | StdDev: 8.38  | 12.5%           |                        |
|                                 |                     |              |            | 3      | 467.2           | 643.8  | y12 <sup>2+</sup> | 76                | 61  | 61  | 56 | 65  | 65  | 81             | 467.2 / 643.8       | Range: 56.0 - 81.0  | Mean: 66.43         | StdDev: 8.9   | 13.4%           |                        |
|                                 |                     |              |            | 3      | 467.2           | 720.39 | y7                | 76                | 61  | 61  | 56 | 65  | 65  | 81             | 467.2 / 720.39      | Range: 58.0 - 81.0  | Mean: 66.71         | StdDev: 8.54  | 12.8%           |                        |
|                                 | INDISHTQVSASAK      | ni0101       | 1407.3     | 3      | 469.9           | 590.81 | y11 <sup>2+</sup> | 76                | 61  | 61  | 59 | 65  | 65  | 81             | 469.9 / 590.81      | Range: 59.0 - 81.0  | Mean: 66.86         | StdDev: 8.38  | 12.5%           |                        |
|                                 |                     |              |            | 3      | 469.9           | 647.83 | y12 <sup>2+</sup> | 76                | 61  | 61  | 56 | 65  | 65  | 81             | 469.9 / 647.83      | Range: 56.0 - 81.0  | Mean: 66.43         | StdDev: 8.9   | 13.4%           |                        |
|                                 |                     |              |            | 3      | 469.9           | 728.4  | y7                | 76                | 61  | 61  | 58 | 65  | 65  | 81             | 469.9 / 728.4       | Range: 58.0 - 81.0  | Mean: 66.71         | StdDev: 8.54  | 12.8%           |                        |
| myoglobin (MYO)                 | LFTGHPETLEK         | bi0171       | 1271.7     | 3      | 424.6           | 506.3  | y9 <sup>2+</sup>  | 71                | 66  | 66  | 64 | 65  | 65  | 80             | 424.6 / 506.3       | Range: 64.0 - 80.0  | Mean: 68.14         | StdDev: 5.7   | 8.4%            |                        |
|                                 |                     |              |            | 3      | 424.6           | 579.8  | y10 <sup>2+</sup> | 71                | 66  | 66  | 54 | 65  | 65  | 80             | 424.6 / 579.8       | Range: 54.0 - 80.0  | Mean: 66.71         | StdDev: 7.78  | 11.7%           |                        |
|                                 |                     |              |            | 3      | 424.6           | 716.4  | y6 <sup>2+</sup>  | 71                | 66  | 66  | 56 | 65  | 65  | 80             | 424.6 / 716.4       | Range: 56.0 - 80.0  | Mean: 67.0          | StdDev: 7.26  | 10.8%           |                        |
|                                 | LFTGHPETLEK         | ni0102       | 1279.7     | 3      | 427.2           | 510.27 | y9 <sup>2+</sup>  | 71                | 66  | 66  | 64 | 65  | 65  | 80             | 427.2 / 510.27      | Range: 64.0 - 80.0  | Mean: 68.14         | StdDev: 5.7   | 8.4%            |                        |
|                                 |                     |              |            | 3      | 427.2           | 583.8  | y10 <sup>2+</sup> | 71                | 66  | 66  | 54 | 65  | 65  | 80             | 427.2 / 583.8       | Range: 54.0 - 80.0  | Mean: 66.71         | StdDev: 7.78  | 11.7%           |                        |
|                                 |                     |              |            | 3      | 427.2           | 724.4  | y6                | 71                | 66  | 66  | 56 | 65  | 65  | 80             | 427.2 / 724.4       | Range: 56.0 - 80.0  | Mean: 67.0          | StdDev: 7.26  | 10.8%           |                        |
| myelin basic protein (MBP)      | HGFLPR              | bi0169       | 726.4      | 2      | 363.7           | 385.3  | y3                | 70                | 70  | 70  | 61 | 70  | 70  | 82             | 363.7 / 385.3       | Range: 61.0 - 82.0  | Mean: 70.43         | StdDev: 6.11  | 8.7%            |                        |
|                                 |                     |              |            | 2      | 363.7           | 532.3  | y4                | 70                | 70  | 70  | 64 | 70  | 70  | 82             | 363.7 / 532.3       | Range: 64.0 - 82.0  | Mean: 70.86         | StdDev: 5.4   | 7.6%            |                        |
|                                 |                     |              |            | 2      | 363.7           | 589.4  | y5                | 70                | 70  | 70  | 69 | 70  | 70  | 82             | 363.7 / 589.4       | Range: 69.0 - 82.0  | Mean: 71.57         | StdDev: 4.61  | 6.4%            |                        |
|                                 | HGFLPR              | ni0104       | 732.4      | 2      | 366.7           | 391.3  | y3                | 70                | 70  | 70  | 61 | 70  | 70  | 82             | 366.7 / 391.3       | Range: 61.0 - 82.0  | Mean: 70.43         | StdDev: 6.11  | 8.7%            |                        |
|                                 |                     |              |            | 2      | 366.7           | 538.3  | y4                | 70                | 70  | 70  | 64 | 70  | 70  | 82             | 366.7 / 538.3       | Range: 64.0 - 82.0  | Mean: 70.86         | StdDev: 5.4   | 7.6%            |                        |
|                                 |                     |              |            | 2      | 366.7           | 595.4  | y5                | 70                | 70  | 70  | 69 | 70  | 70  | 82             | 366.7 / 595.4       | Range: 69.0 - 82.0  | Mean: 71.57         | StdDev: 4.61  | 6.4%            |                        |
|                                 | YLASASTMDHAR        | bi0170       | 1322.6     | 3      | 441.5           | 488.2  | y9 <sup>2+</sup>  | 90                | 61  | 65  | 51 | 60  | 48  | 76             | 441.5 / 488.2       | Range: 48.0 - 90.0  | Mean: 64.43         | StdDev: 14.55 | 22.6%           |                        |
|                                 |                     |              |            | 3      | 441.5           | 523.7  | y10 <sup>2+</sup> | 90                | 61  | 55  | 54 | 60  | 48  | 76             | 441.5 / 523.7       | Range: 48.0 - 90.0  | Mean: 63.43         | StdDev: 14.6  | 23.0%           |                        |
|                                 |                     |              |            | 3      | 441.5           | 817.4  | y7                | 90                | 61  | 61  | 51 | 60  | 48  | 76             | 441.5 / 817.4       | Range: 48.0 - 90.0  | Mean: 63.86         | StdDev: 14.6  | 22.9%           |                        |
|                                 |                     | YLASASTMDHAR | ni0105     | 1328.6 | 3               | 443.5  | 491.23            | y9 <sup>2+</sup>  | 90  | 61  | 65 | 51  | 60  | 48             | 76                  | 443.5 / 491.23      | Range: 48.0 - 90.0  | Mean: 64.43   | StdDev: 14.55   | 22.6%                  |
|                                 |                     |              |            |        | 3               | 443.5  | 526.75            | y10 <sup>2+</sup> | 90  | 61  | 55 | 54  | 60  | 48             | 76                  | 443.5 / 526.75      | Range: 48.0 - 90.0  | Mean: 63.43   | StdDev: 14.6    | 23.0%                  |
|                                 |                     |              |            |        | 3               | 443.5  | 823.38            | y7                | 90  | 61  | 61 | 51  | 60  | 48             | 76                  | 443.5 / 823.38      | Range: 48.0 - 90.0  | Mean: 63.86   | StdDev: 14.6    | 22.9%                  |
| prostate specific antigen (PSA) | IVGGWECamcEK        | bi0161       | 1077.5     | 2      | 539.3           | 808.3  | y6                | 81                | 75  | 75  | 64 | 70  | 65  | 81             | 539.3 / 808.3       | Range: 64.0 - 81.0  | Mean: 73.0          | StdDev: 6.95  | 9.5%            |                        |
|                                 |                     |              |            | 2      | 539.3           | 865.4  | y7                | 81                | 75  | 75  | 66 | 70  | 65  | 81             | 539.3 / 865.4       | Range: 65.0 - 81.0  | Mean: 73.29         | StdDev: 6.55  | 8.9%            |                        |
|                                 |                     |              |            | 2      | 539.3           | 964.42 | y8                | 81                | 75  | 75  | 61 | 70  | 65  | 81             | 539.3 / 964.42      | Range: 61.0 - 81.0  | Mean: 72.57         | StdDev: 7.66  | 10.6%           |                        |
|                                 | IVGGWECamcEK        | bi0067       | 1082.5     | 2      | 541.7           | 808.33 | y6                | 81                | 75  | 75  | 64 | 70  | 65  | 81             | 541.7 / 808.33      | Range: 64.0 - 81.0  | Mean: 73.0          | StdDev: 6.95  | 9.5%            |                        |
|                                 |                     |              |            | 2      | 541.7           | 865.35 | y7                | 81                | 75  | 75  | 66 | 70  | 65  | 81             | 541.7 / 865.35      | Range: 65.0 - 81.0  | Mean: 73.29         | StdDev: 6.55  | 8.9%            |                        |
|                                 |                     |              |            | 2      | 541.7           | 969.44 | y8                | 81                | 75  | 75  | 61 | 70  | 65  | 81             | 541.7 / 969.44      | Range: 61.0 - 81.0  | Mean: 72.57         | StdDev: 7.66  | 10.6%           |                        |
|                                 | LSEPAELTDAVK        | bi0037       | 1272.7     | 2      | 636.8           | 775.4  | y7                | 91                | 75  | 75  | 74 | 75  | 80  | 111            | 636.8 / 775.4       | Range: 74.0 - 111.0 | Mean: 83.0          | StdDev: 13.72 | 16.5%           |                        |
|                                 |                     |              |            | 2      | 636.8           | 846.4  | y8                | 91                | 75  | 75  | 71 | 75  | 80  | 111            | 636.8 / 846.4       | Range: 71.0 - 111.0 | Mean: 82.57         | StdDev: 14.09 | 17.1%           |                        |
|                                 |                     |              |            | 2      | 636.8           | 943.4  | y9                | 91                | 75  | 75  | 79 | 75  | 80  | 111            | 636.8 / 943.4       | Range: 75.0 - 111.0 | Mean: 83.71         | StdDev: 13.3  | 15.9%           |                        |
|                                 |                     | LSEPAELTDAVK | ni0107     | 1280.7 | 2               | 640.8  | 783.43            | y7                | 91  | 75  | 75 | 74  | 75  | 80             | 111                 | 640.8 / 783.43      | Range: 74.0 - 111.0 | Mean: 83.0    | StdDev: 13.72   | 16.5%                  |
|                                 |                     |              |            |        | 2               | 640.8  | 854.47            | y8                | 91  | 75  | 75 | 71  | 75  | 80             | 111                 | 640.8 / 854.47      | Range: 71.0 - 111.0 | Mean: 82.57   | StdDev: 14.09   | 17.1%                  |
|                                 |                     |              |            |        | 2               | 640.8  | 951.52            | y9                | 91  | 75  | 75 | 79  | 75  | 80             | 111                 | 640.8 / 951.52      | Range: 75.0 - 111.0 | Mean: 83.71   | StdDev: 13.3    | 15.9%                  |
| SSDLVALSGGHTFGK                 | bi0166              | 1475.7       | 3          | 492.6  | 703.35          | y7     | 76                | 70                | 70  | 64  | 69 | 60  | 81  | 492.6 / 703.35 | Range: 60.0 - 81.0  | Mean: 70.0          | StdDev: 7.0         | 10.0%         |                 |                        |
|                                 |                     |              | 3          | 492.6  | 790.38          | y8     | 76                | 70                | 70  | 59  | 69 | 60  | 81  | 492.6 / 790.38 | Range: 59.0 - 81.0  | Mean: 69.29         | StdDev: 7.91        | 11.4%         |                 |                        |
|                                 |                     |              | 3          | 492.6  | 974.51          | y10    | 76                | 70                | 70  | 54  | 69 | 60  | 81  | 492.6 / 974.51 | Range: 54.0 - 81.0  | Mean: 68.57         | StdDev: 9.13        | 13.3%         |                 |                        |
|                                 | SSDLVALSGGHTFGK     | ni0108       | 1483.8     | 3      | 495.3           | 711.37 | y7                | 76                | 70  | 70  | 64 | 69  | 60  | 81             | 495.3 / 711.37      | Range: 60.0 - 81.0  | Mean: 70.0          | StdDev: 7.0   | 10.0%           |                        |
|                                 |                     |              |            | 3      | 495.3           | 798.4  | y8                | 76                | 70  | 70  | 59 | 69  | 60  | 81             | 495.3 / 798.4       | Range: 59.0 - 81.0  | Mean: 69.29         | StdDev: 7.91  | 11.4%           |                        |
|                                 |                     |              |            | 3      | 495.3           | 982.52 | y10               | 76                | 70  | 70  | 54 | 69  | 60  | 81             | 495.3 / 982.52      | Range: 54.0 - 81.0  | Mean: 68.57         | StdDev: 9.13  | 13.3%           |                        |
| ESDTSYVSLK                      | bi0231              | 1128.5       | 2          | 564.8  | 609.4           | y5     | 81                | 86                | 70  | 64  | 79 | 70  | 86  | 564.8 / 609.4  | Range: 64.0 - 86.0  | Mean: 76.57         | StdDev: 8.41        | 11.3%         |                 |                        |
|                                 |                     |              | 2          | 564.8  | 696.4           | y6     | 81                | 86                | 70  | 61  | 79 | 70  | 86  | 564.8 / 696.4  | Range: 61.0 - 86.0  | Mean: 76.14         | StdDev: 9.41        | 12.4%         |                 |                        |
|                                 |                     |              | 2          | 564.8  | 797.4           | y7     | 81                | 81                | 70  | 56  | 80 | 70  | 86  | 564.8 / 797.4  | Range: 56.0 - 86.0  | Mean: 74.86         | StdDev: 10.24       | 13.7%         |                 |                        |
|                                 | ESDTSYVSLK          | ni0109       | 1136.6     | 2      | 568.8           | 617.37 | y5                | 81                | 86  | 70  | 64 | 79  | 70  | 86             | 568.8 / 617.37      | Range: 64.0 - 86.0  | Mean: 76.57         | StdDev: 8.64  | 11.3%           |                        |
|                                 |                     |              |            | 2      | 568.8           | 707.81 | y6                | 81                | 86  | 70  | 61 | 79  | 70  | 86             | 568.8 / 707.81      | Range: 61.0 - 86.0  | Mean: 76.14         | StdDev: 9.41  | 12.4%           |                        |
|                                 |                     |              |            | 2      | 568.8           | 805.45 | y7                | 81                | 81  | 70  | 56 | 80  | 70  | 86             | 568.8 / 805.45      | Range: 56.0 - 86.0  | Mean: 74.86         | StdDev: 10.24 | 13.7%           |                        |
|                                 | GYSIFS YATK         | bi0202       | 1136.3     | 2      | 568.8           | 716.4  | y6                | 76                | 91  | 70  | 61 | 67  | 62  | 81             | 568.8 / 716.4       | Range: 61.0 - 91.0  | Mean: 72.57         | StdDev: 10.85 | 14.9%           |                        |
|                                 |                     |              |            | 2      | 568.8           | 829.5  | y7                | 76                | 51  | 70  | 59 | 67  | 62  | 81             | 568.8 / 829.5       | Range: 51.0 - 81.0  | Mean: 66.57         | StdDev: 10.24 | 15.4%           |                        |
|                                 |                     |              |            | 2      | 568.8           | 916.5  | y8                | 76                | 71  | 70  | 59 | 67  | 62  | 81             | 568.8 / 916.5       | Range: 59.0 - 81.0  | Mean: 69.43         | StdDev: 7.63  | 11.0%           |                        |
|                                 |                     | GYSIFS YATK  | ni0110     | 1144.6 | 2               | 572.8  | 724.38            | y6                | 76  | 91  | 70 | 61  | 67  | 62             | 81                  | 572.8 / 724.38      | Range: 61.0 - 91.0  | Mean: 72.57   | StdDev: 10.85   | 14.9%                  |
|                                 |                     |              |            |        | 2               | 572.8  | 837.46            | y7                | 76  | 51  | 70 | 59  | 67  | 62             | 81                  | 572.8 / 837.46      | Range: 51.0 - 81.0  | Mean: 66.57   | StdDev: 10.24   | 15.4%                  |
|                                 |                     |              |            |        | 2               | 572.8  | 924.49            | y8                | 76  | 71  | 70 | 59  | 67  | 62             | 81                  | 572.8 / 924.49      | Range: 59.0 - 81.0  | Mean: 69.43   | StdDev: 7.63    | 11.0%                  |
| YEYQGEVFTKPQLWP                 | ni0001              | 1820.9       | 2          | 911    | 1053.5          | b9     | 106               | 80                | 85  | 96  | 95 | 80  | 106 | 911 / 1053.5   | Range: 80.0 - 106.0 | Mean: 92.57         | StdDev: 11.19       | 12.1%         |                 |                        |
|                                 |                     |              | 2          | 911    | 1181.6          | b10    | 106               | 80                | 85  | 81  | 95 | 80  | 106 |                |                     |                     |                     |               |                 |                        |

# Supplement Page 44

**Supplementary Table 1D: Comparisons of specific Instrument Collision Energy (CE) for all MRM Transitions from seven CPTAC sites with 4000 QTRAP instruments.**

## MRM Transition CE Value comparison

| Protein                         | Signature Peptide   | Identifier  | MH+ (mono) | z      | MRM Transitions |         | Fragment Ion Type | CPTAC sites: |          |          |          |          |          |               | Q1/Q3 transition   | range of CE        | mean of CE         | std. dev. of CE | std. dev. of CE (in %) |       |
|---------------------------------|---------------------|-------------|------------|--------|-----------------|---------|-------------------|--------------|----------|----------|----------|----------|----------|---------------|--------------------|--------------------|--------------------|-----------------|------------------------|-------|
|                                 |                     |             |            |        | Q1              | Q3      |                   | site @52     | site @56 | site @86 | site @95 | site @73 | site @19 | site @54      |                    |                    |                    |                 |                        |       |
| aprotinin (APR)                 | AGLCamcQTFVYGGCamcR | bi0173      | 1488.7     | 2      | 744.8           | 858.4   | y7                | 40           | 35       | 38       | 41       | 40       | 38       | 43            | 744.8 / 858.4      | Range: 35.0 - 43.0 | Mean: 39.29        | StdDev: 2.56    | 6.5%                   |       |
|                                 |                     |             |            | 2      | 744.8           | 959.4   | y8                | 40           | 38       | 38       | 45       | 39       | 37       | 41            | 744.8 / 959.4      | Range: 37.0 - 45.0 | Mean: 39.71        | StdDev: 2.69    | 6.8%                   |       |
|                                 |                     |             |            | 2      | 744.8           | 1087.5  | y9                | 38           | 40       | 40       | 42       | 39       | 44       | 39            | 744.8 / 1087.5     | Range: 38.0 - 44.0 | Mean: 40.29        | StdDev: 2.06    | 5.1%                   |       |
|                                 | AGLCamcQTFVYGGCamcR | bi0081      | 1493.7     | 2      | 747.3           | 863.4   | y7                | 40           | 35       | 38       | 41       | 40       | 38       | 43            | 747.3 / 863.4      | Range: 35.0 - 43.0 | Mean: 39.29        | StdDev: 2.56    | 6.5%                   |       |
|                                 |                     |             |            | 2      | 747.3           | 964.4   | y8                | 40           | 38       | 38       | 45       | 39       | 37       | 41            | 747.3 / 964.4      | Range: 37.0 - 45.0 | Mean: 39.71        | StdDev: 2.69    | 6.8%                   |       |
|                                 |                     |             |            | 2      | 747.3           | 1092.5  | y9                | 38           | 40       | 40       | 42       | 39       | 44       | 39            | 747.3 / 1092.5     | Range: 38.0 - 44.0 | Mean: 40.29        | StdDev: 2.06    | 5.1%                   |       |
| leptin (LEP)                    | INDISHTQSVSAK       | bi0167      | 1399.7     | 3      | 467.2           | 586.8   | y11 <sup>2+</sup> | 21           | 20       | 22       | 26       | 22       | 20       | 23            | 467.2 / 586.8      | Range: 20.0 - 26.0 | Mean: 22.0         | StdDev: 2.08    | 9.5%                   |       |
|                                 |                     |             |            | 3      | 467.2           | 643.8   | y12 <sup>2+</sup> | 23           | 20       | 22       | 29       | 22       | 21       | 29            | 467.2 / 643.8      | Range: 20.0 - 29.0 | Mean: 23.71        | StdDev: 3.73    | 15.7%                  |       |
|                                 |                     |             |            | 3      | 467.2           | 720.39  | y7                | 29           | 20       | 30       | 31       | 28       | 27       | 27            | 467.2 / 720.39     | Range: 20.0 - 31.0 | Mean: 27.43        | StdDev: 3.6     | 13.1%                  |       |
|                                 | INDISHTQSVSAK       | ni0101      | 1407.3     | 3      | 469.9           | 590.81  | y11 <sup>2+</sup> | 21           | 20       | 22       | 26       | 22       | 20       | 23            | 469.9 / 590.81     | Range: 20.0 - 26.0 | Mean: 22.0         | StdDev: 2.08    | 9.5%                   |       |
|                                 |                     |             |            | 3      | 469.9           | 647.83  | y12 <sup>2+</sup> | 23           | 20       | 22       | 29       | 22       | 21       | 29            | 469.9 / 647.83     | Range: 20.0 - 29.0 | Mean: 23.71        | StdDev: 3.73    | 15.7%                  |       |
|                                 |                     |             |            | 3      | 469.9           | 728.4   | y7                | 29           | 20       | 30       | 31       | 28       | 27       | 27            | 469.9 / 728.4      | Range: 20.0 - 31.0 | Mean: 27.43        | StdDev: 3.6     | 13.1%                  |       |
| myoglobin (MYO)                 | LFTGHPETLEK         | bi0171      | 1271.7     | 3      | 424.6           | 506.3   | y9 <sup>2+</sup>  | 19           | 18       | 18       | 23       | 19       | 18       | 19            | 424.6 / 506.3      | Range: 18.0 - 23.0 | Mean: 19.14        | StdDev: 1.77    | 9.3%                   |       |
|                                 |                     |             |            | 3      | 424.6           | 579.8   | y10 <sup>2+</sup> | 20           | 19       | 20       | 26       | 19       | 19       | 21            | 424.6 / 579.8      | Range: 19.0 - 26.0 | Mean: 20.57        | StdDev: 2.51    | 12.2%                  |       |
|                                 |                     |             |            | 3      | 424.6           | 716.4   | y6                | 25           | 24       | 24       | 25       | 23       | 24       | 25            | 424.6 / 716.4      | Range: 23.0 - 25.0 | Mean: 24.29        | StdDev: 0.76    | 3.1%                   |       |
|                                 | LFTGHPETLEK         | ni0102      | 1279.7     | 3      | 427.2           | 510.27  | y9 <sup>2+</sup>  | 19           | 18       | 18       | 23       | 19       | 18       | 19            | 427.2 / 510.27     | Range: 18.0 - 23.0 | Mean: 19.14        | StdDev: 1.77    | 9.3%                   |       |
|                                 |                     |             |            | 3      | 427.2           | 583.8   | y10 <sup>2+</sup> | 20           | 19       | 20       | 26       | 19       | 19       | 21            | 427.2 / 583.8      | Range: 19.0 - 26.0 | Mean: 20.57        | StdDev: 2.51    | 12.2%                  |       |
|                                 |                     |             |            | 3      | 427.2           | 724.4   | y6                | 25           | 24       | 24       | 25       | 23       | 24       | 25            | 427.2 / 724.4      | Range: 23.0 - 25.0 | Mean: 24.29        | StdDev: 0.76    | 3.1%                   |       |
| myelin basic protein (MBP)      | HGFLPR              | bi0169      | 726.4      | 2      | 363.7           | 385.3   | y3                | 23           | 23       | 22       | 27       | 23       | 23       | 29            | 363.7 / 385.3      | Range: 22.0 - 29.0 | Mean: 24.29        | StdDev: 2.63    | 10.8%                  |       |
|                                 |                     |             |            | 2      | 363.7           | 532.3   | y4                | 23           | 22       | 22       | 27       | 22       | 22       | 23            | 363.7 / 532.3      | Range: 22.0 - 27.0 | Mean: 23.0         | StdDev: 1.83    | 7.9%                   |       |
|                                 |                     |             |            | 2      | 363.7           | 589.4   | y5                | 23           | 22       | 23       | 26       | 23       | 22       | 23            | 363.7 / 589.4      | Range: 22.0 - 26.0 | Mean: 23.14        | StdDev: 1.35    | 5.8%                   |       |
|                                 | HGFLPR              | ni0104      | 732.4      | 2      | 366.7           | 391.3   | y3                | 23           | 23       | 22       | 27       | 23       | 23       | 29            | 366.7 / 391.3      | Range: 22.0 - 29.0 | Mean: 24.29        | StdDev: 2.63    | 10.8%                  |       |
|                                 |                     |             |            | 2      | 366.7           | 538.3   | y4                | 23           | 22       | 22       | 27       | 22       | 22       | 23            | 366.7 / 538.3      | Range: 22.0 - 27.0 | Mean: 23.0         | StdDev: 1.83    | 7.9%                   |       |
|                                 |                     |             |            | 2      | 366.7           | 595.4   | y5                | 23           | 22       | 23       | 26       | 23       | 22       | 23            | 366.7 / 595.4      | Range: 22.0 - 26.0 | Mean: 23.14        | StdDev: 1.35    | 5.8%                   |       |
| prostate specific antigen (PSA) | IVGWECamcEK         | bi0161      | 1077.5     | 2      | 539.3           | 808.3   | y6                | 27           | 27       | 27       | 29       | 27       | 25       | 37            | 539.3 / 808.3      | Range: 25.0 - 37.0 | Mean: 28.43        | StdDev: 3.95    | 13.9%                  |       |
|                                 |                     |             |            | 2      | 539.3           | 865.4   | y7                | 26           | 25       | 25       | 29       | 26       | 25       | 25            | 539.3 / 865.4      | Range: 25.0 - 29.0 | Mean: 25.86        | StdDev: 1.46    | 5.7%                   |       |
|                                 |                     |             |            | 2      | 539.3           | 964.42  | y8                | 27           | 27       | 28       | 29       | 27       | 27       | 27            | 539.3 / 964.42     | Range: 27.0 - 29.0 | Mean: 27.43        | StdDev: 0.79    | 2.9%                   |       |
|                                 | IVGWECamcEK         | bi0067      | 1082.5     | 2      | 541.7           | 808.33  | y6                | 27           | 27       | 27       | 29       | 27       | 25       | 37            | 541.7 / 808.33     | Range: 25.0 - 37.0 | Mean: 28.43        | StdDev: 3.95    | 13.9%                  |       |
|                                 |                     |             |            | 2      | 541.7           | 865.35  | y7                | 26           | 25       | 25       | 29       | 26       | 25       | 25            | 541.7 / 865.35     | Range: 25.0 - 29.0 | Mean: 25.86        | StdDev: 1.46    | 5.7%                   |       |
|                                 |                     |             |            | 2      | 541.7           | 969.44  | y8                | 27           | 27       | 28       | 29       | 27       | 27       | 27            | 541.7 / 969.44     | Range: 27.0 - 29.0 | Mean: 27.43        | StdDev: 0.79    | 2.9%                   |       |
| LSEPAELTDAVK                    | bi0037              | 1272.7      | 2          | 636.8  | 775.4           | y7      | 39                | 39           | 37       | 40       | 38       | 35       | 41       | 636.8 / 775.4 | Range: 35.0 - 41.0 | Mean: 38.43        | StdDev: 1.99       | 5.2%            |                        |       |
|                                 |                     |             | 2          | 636.8  | 846.4           | y8      | 37                | 39           | 38       | 48       | 38       | 35       | 39       | 636.8 / 846.4 | Range: 35.0 - 48.0 | Mean: 39.14        | StdDev: 4.14       | 10.6%           |                        |       |
|                                 |                     |             | 2          | 636.8  | 943.4           | y9      | 29                | 31           | 30       | 33       | 30       | 27       | 31       | 636.8 / 943.4 | Range: 27.0 - 33.0 | Mean: 30.14        | StdDev: 1.86       | 6.2%            |                        |       |
|                                 | LSEPAELTDAVK        | ni0107      | 1280.7     | 2      | 640.8           | 783.43  | y7                | 39           | 39       | 37       | 40       | 38       | 35       | 41            | 640.8 / 783.43     | Range: 35.0 - 41.0 | Mean: 38.43        | StdDev: 1.99    | 5.2%                   |       |
|                                 |                     |             |            | 2      | 640.8           | 854.47  | y8                | 37           | 39       | 38       | 48       | 38       | 35       | 39            | 640.8 / 854.47     | Range: 35.0 - 48.0 | Mean: 39.14        | StdDev: 4.14    | 10.6%                  |       |
|                                 |                     |             |            | 2      | 640.8           | 951.52  | y9                | 29           | 31       | 30       | 33       | 30       | 27       | 31            | 640.8 / 951.52     | Range: 27.0 - 33.0 | Mean: 30.14        | StdDev: 1.86    | 6.2%                   |       |
| horseradish peroxidase (HRP)    | SSDLVALSGGHTFGK     | bi0166      | 1475.7     | 3      | 492.6           | 703.35  | y7                | 27           | 27       | 26       | 29       | 26       | 27       | 27            | 492.6 / 703.35     | Range: 26.0 - 29.0 | Mean: 27.0         | StdDev: 1.0     | 3.7%                   |       |
|                                 |                     |             |            | 3      | 492.6           | 790.38  | y8                | 27           | 27       | 26       | 32       | 27       | 27       | 27            | 492.6 / 790.38     | Range: 26.0 - 32.0 | Mean: 27.57        | StdDev: 1.99    | 7.2%                   |       |
|                                 |                     |             |            | 3      | 492.6           | 974.51  | y10               | 26           | 24       | 26       | 28       | 25       | 26       | 25            | 492.6 / 974.51     | Range: 24.0 - 28.0 | Mean: 25.71        | StdDev: 1.25    | 4.9%                   |       |
|                                 | SSDLVALSGGHTFGK     | ni0108      | 1483.8     | 3      | 495.3           | 711.37  | y7                | 27           | 27       | 26       | 29       | 26       | 27       | 27            | 495.3 / 711.37     | Range: 26.0 - 29.0 | Mean: 27.0         | StdDev: 1.0     | 3.7%                   |       |
|                                 |                     |             |            | 3      | 495.3           | 798.4   | y8                | 27           | 27       | 26       | 32       | 27       | 27       | 27            | 495.3 / 798.4      | Range: 26.0 - 32.0 | Mean: 27.57        | StdDev: 1.99    | 7.2%                   |       |
|                                 |                     |             |            | 3      | 495.3           | 982.52  | y10               | 26           | 24       | 26       | 28       | 25       | 26       | 25            | 495.3 / 982.52     | Range: 24.0 - 28.0 | Mean: 25.71        | StdDev: 1.25    | 4.9%                   |       |
| C-reactive Protein (CRP)        | ESDTSYVSLK          | bi0231      | 1128.5     | 2      | 564.8           | 609.4   | y5                | 27           | 23       | 26       | 27       | 26       | 27       | 27            | 564.8 / 609.4      | Range: 23.0 - 27.0 | Mean: 26.14        | StdDev: 1.46    | 5.6%                   |       |
|                                 |                     |             |            | 2      | 564.8           | 696.4   | y6                | 27           | 31       | 29       | 29       | 27       | 27       | 27            | 564.8 / 696.4      | Range: 27.0 - 31.0 | Mean: 28.14        | StdDev: 1.57    | 5.6%                   |       |
|                                 |                     |             |            | 2      | 564.8           | 797.4   | y7                | 29           | 31       | 28       | 30       | 28       | 28       | 31            | 564.8 / 797.4      | Range: 28.0 - 31.0 | Mean: 29.29        | StdDev: 1.38    | 4.7%                   |       |
|                                 | ESDTSYVSLK          | ni0109      | 1136.6     | 2      | 568.8           | 617.37  | y5                | 27           | 23       | 26       | 27       | 26       | 27       | 27            | 568.8 / 617.37     | Range: 23.0 - 27.0 | Mean: 26.14        | StdDev: 1.46    | 5.6%                   |       |
|                                 |                     |             |            | 2      | 568.8           | 704.41  | y6                | 27           | 31       | 29       | 29       | 27       | 27       | 27            | 568.8 / 704.41     | Range: 27.0 - 31.0 | Mean: 28.14        | StdDev: 1.57    | 5.6%                   |       |
|                                 |                     |             |            | 2      | 568.8           | 805.45  | y7                | 29           | 31       | 28       | 30       | 28       | 28       | 31            | 568.8 / 805.45     | Range: 28.0 - 31.0 | Mean: 29.29        | StdDev: 1.38    | 4.7%                   |       |
|                                 | GYSIFS YATK         | bi0202      | 1136.3     | 2      | 568.8           | 716.4   | y6                | 30           | 31       | 26       | 27       | 27       | 26       | 37            | 568.8 / 716.4      | Range: 26.0 - 37.0 | Mean: 29.14        | StdDev: 3.98    | 13.6%                  |       |
|                                 |                     |             |            | 2      | 568.8           | 829.5   | y7                | 27           | 27       | 26       | 29       | 25       | 26       | 27            | 568.8 / 829.5      | Range: 25.0 - 29.0 | Mean: 26.71        | StdDev: 2.75    | 4.7%                   |       |
|                                 |                     |             |            | 2      | 568.8           | 916.5   | y8                | 25           | 25       | 25       | 28       | 24       | 25       | 25            | 568.8 / 916.5      | Range: 24.0 - 28.0 | Mean: 25.29        | StdDev: 1.25    | 5.0%                   |       |
|                                 |                     | GYSIFS YATK | ni0110     | 1144.6 | 2               | 572.8   | 724.38            | y6           | 30       | 31       | 26       | 27       | 27       | 26            | 37                 | 572.8 / 724.38     | Range: 26.0 - 37.0 | Mean: 29.14     | StdDev: 3.98           | 13.6% |
|                                 |                     |             |            |        | 2               | 572.8   | 837.46            | y7           | 27       | 27       | 26       | 29       | 25       | 26            | 27                 | 572.8 / 837.46     | Range: 25.0 - 29.0 | Mean: 26.71     | StdDev: 1.25           | 4.7%  |
|                                 |                     |             |            |        | 2               | 572.8   | 924.49            | y8           | 25       | 25       | 25       | 28       | 24       | 25            | 25                 | 572.8 / 924.49     | Range: 24.0 - 28.0 | Mean: 25.29     | StdDev: 1.25           | 5.0%  |
| YEVOGVEFTKPKQLWP                | ni0001              | 1820.9      | 2          | 911    | 1053.5          | b9      | 34                | 35           | 39       | 39       | 33       | 35       | 33       | 911 / 1053.5  | Range: 33.0 - 39.0 | Mean: 35.43        | StdDev: 2.57       | 7.3%            |                        |       |
|                                 |                     |             | 2          | 911    | 1181.6          | b10     | 33                | 32           | 40       | 36       | 34       | 33       | 31       | 911 / 1181.6  | Range: 31.0 - 40.0 | Mean: 34.14        | StdDev: 3.02       | 8.9%            |                        |       |
|                                 |                     |             | 2          | 911    | 1519.8          | b13     | 37                | 36           | 38       | 37       | 37       | 35       | 35       | 911 / 1519.8  | Range: 35.0 - 38.0 | Mean: 36.43        | StdDev: 1.13       | 3.1%            |                        |       |
|                                 | YEVOGVEFTKPKQLWP    | ni0111      | 1826.9     | 2      | 914             | 1053.49 | b9                | 34           | 35       | 39       | 39       | 33       | 35       | 33            | 914 / 1053.49      | Range: 33.0 - 39.0 | Mean: 35.43        | StdDev: 2.57    | 7.3%                   |       |
|                                 |                     |             |            | 2      | 914             | 1181.58 | b10               | 33           | 32       | 40       | 36       | 34       | 33       | 31            | 914 / 1181.58      | Range: 31.0 - 40.0 | Mean: 34.14        | StdDev: 3.02    | 8.9%                   |       |
|                                 |                     |             |            | 2      | 914             | 1525.8  | b13               | 37           | 36       | 38       | 37       | 37       | 35       | 35            | 914 / 1525.8       | Range: 35.0 - 38.0 | Mean: 36.43        | StdDev: 1.13    | 3.1%                   |       |

**Footnote:** Instrument Parameters for MRM transitions were optimized for maximum transmission efficiency and sensitivity for individual instruments by infusion of unlabeled signature peptides. Optimized collision energy (CE) are reported for 4000 QTRAP instruments for each MRM transition along with the corresponding instrument used at each site. The TSQ Quantum Ultra instrument at CPTAC site @65 is not included in this specific comparison, for TSQ Quantum Ultra instrument parameters see Supplementary Table 1B. Boldface type indicates labeled peptide internal standard with labeled amino acid in red.

# Supplement Page 45

**Supplementary Table 1E: Comparisons of specific Instrument Parameter Collision Cell Exit Potential (CXP) for all MRM Transitions from seven CPTAC sites with 4000 QTRAP instruments.**

## MRM Transition CXP Value comparison

| Protein                         | Signature Peptide   | Identifier | MH+ (mono) | z (Q1) | MRM Transitions |        | Fragment Ion Type | CXP                                                            | CPTAC sites:                                                     |                                                                  |                |                |          |          |          |
|---------------------------------|---------------------|------------|------------|--------|-----------------|--------|-------------------|-----|-----|-----|-----|-----|-----|----------------------------------------------------------------|------------------------------------------------------------------|------------------------------------------------------------------|----------------|----------------|----------|----------|----------|
|                                 |                     |            |            |        | Q1              | Q3     |                   |     |     |     |     |     |     |                                                                | site @52                                                         | site @56                                                         | site @86       | site @95       | site @73 | site @19 | site @54 |
|                                 |                     |            |            |        |                 |        |                   |     |     |     |     |     |     |                                                                | across 7 sites                                                   | across 7 sites                                                   | across 7 sites | across 7 sites |          |          |          |
| aprotinin (APR)                 | AGLCamcQTFVYGGCamcR | bi0173     | 1488.7     | 2      | 744.8           | 858.4  | y7                | 12  | 16  | 20  | 29  | 13  | 23  | 14                                                             | 744.8 / 858.4 Range: 12.0 - 29.0 Mean: 18.14 StdDev: 6.2 34.2%   |                                                                  |                |                |          |          |          |
|                                 |                     |            |            |        | 744.8           | 959.4  | y8                | 14  | 16  | 22  | 17  | 13  | 23  | 6                                                              |                                                                  | 744.8 / 959.4 Range: 6.0 - 23.0 Mean: 15.86 StdDev: 5.76 36.3%   |                |                |          |          |          |
|                                 |                     |            |            |        | 744.8           | 1087.5 | y9                | 17  | 16  | 24  | 20  | 13  | 23  | 10                                                             |                                                                  | 744.8 / 1087.5 Range: 10.0 - 24.0 Mean: 17.57 StdDev: 5.13 29.2% |                |                |          |          |          |
|                                 |                     |            |            |        | 747.3           | 863.4  | y7                | 12  | 16  | 20  | 29  | 13  | 23  | 14                                                             |                                                                  | 747.3 / 863.4 Range: 12.0 - 29.0 Mean: 18.14 StdDev: 6.2 34.2%   |                |                |          |          |          |
|                                 |                     |            |            |        | 747.3           | 964.4  | y8                | 14  | 16  | 22  | 17  | 13  | 23  | 6                                                              |                                                                  | 747.3 / 964.4 Range: 6.0 - 23.0 Mean: 15.86 StdDev: 5.76 36.3%   |                |                |          |          |          |
|                                 |                     |            |            |        | 747.3           | 1092.5 | y9                | 17  | 16  | 24  | 20  | 13  | 23  | 10                                                             |                                                                  | 747.3 / 1092.5 Range: 10.0 - 24.0 Mean: 17.57 StdDev: 5.13 29.2% |                |                |          |          |          |
| leptin (LEP)                    | INDISHTQSVSAK       | bi0167     | 1399.7     | 3      | 467.2           | 566.8  | y11 <sup>2+</sup> | 10  | 12  | 12  | 19  | 21  | 23  | 10                                                             | 467.2 / 566.8 Range: 10.0 - 23.0 Mean: 15.29 StdDev: 5.53 36.2%  |                                                                  |                |                |          |          |          |
|                                 |                     |            |            |        | 467.2           | 643.8  | y12 <sup>2+</sup> | 10  | 12  | 14  | 21  | 11  | 23  | 12                                                             |                                                                  | 467.2 / 643.8 Range: 10.0 - 23.0 Mean: 14.71 StdDev: 5.15 35.0%  |                |                |          |          |          |
|                                 |                     |            |            |        | 467.2           | 720.39 | y7                | 10  | 12  | 16  | 20  | 18  | 23  | 8                                                              |                                                                  | 467.2 / 720.39 Range: 8.0 - 23.0 Mean: 15.29 StdDev: 5.5 36.0%   |                |                |          |          |          |
|                                 |                     |            |            |        | 469.9           | 590.81 | y11 <sup>2+</sup> | 10  | 12  | 12  | 19  | 21  | 23  | 10                                                             |                                                                  | 469.9 / 590.81 Range: 10.0 - 23.0 Mean: 15.29 StdDev: 5.53 36.2% |                |                |          |          |          |
|                                 |                     |            |            |        | 469.9           | 647.83 | y12 <sup>2+</sup> | 10  | 12  | 14  | 21  | 11  | 23  | 12                                                             |                                                                  | 469.9 / 647.83 Range: 10.0 - 23.0 Mean: 14.71 StdDev: 5.15 35.0% |                |                |          |          |          |
|                                 |                     |            |            |        | 469.9           | 728.4  | y7                | 10  | 12  | 16  | 20  | 18  | 23  | 8                                                              |                                                                  | 469.9 / 728.4 Range: 8.0 - 23.0 Mean: 15.29 StdDev: 5.5 36.0%    |                |                |          |          |          |
| myoglobin (MYO)                 | LFTGHPETLEK         | bi0171     | 1271.7     | 3      | 424.6           | 506.3  | y9 <sup>2+</sup>  | 8   | 12  | 10  | 16  | 23  | 23  | 8                                                              | 424.6 / 506.3 Range: 8.0 - 23.0 Mean: 14.29 StdDev: 6.55 45.9%   |                                                                  |                |                |          |          |          |
|                                 |                     |            |            |        | 424.6           | 579.8  | y10 <sup>2+</sup> | 8   | 10  | 12  | 10  | 14  | 23  | 8                                                              |                                                                  | 424.6 / 579.8 Range: 8.0 - 23.0 Mean: 12.14 StdDev: 5.24 43.2%   |                |                |          |          |          |
|                                 |                     |            |            |        | 424.6           | 716.4  | y6                | 10  | 13  | 16  | 19  | 14  | 23  | 12                                                             |                                                                  | 424.6 / 716.4 Range: 10.0 - 23.0 Mean: 15.29 StdDev: 4.46 29.2%  |                |                |          |          |          |
|                                 |                     |            |            |        | 427.2           | 510.27 | y9 <sup>2+</sup>  | 8   | 12  | 10  | 16  | 23  | 23  | 8                                                              |                                                                  | 427.2 / 510.27 Range: 8.0 - 23.0 Mean: 14.29 StdDev: 6.55 45.9%  |                |                |          |          |          |
|                                 |                     |            |            |        | 427.2           | 583.8  | y10 <sup>2+</sup> | 8   | 10  | 12  | 10  | 14  | 23  | 8                                                              |                                                                  | 427.2 / 583.8 Range: 8.0 - 23.0 Mean: 12.14 StdDev: 5.24 43.2%   |                |                |          |          |          |
|                                 |                     |            |            |        | 427.2           | 724.4  | y6                | 10  | 13  | 16  | 19  | 14  | 23  | 12                                                             |                                                                  | 427.2 / 724.4 Range: 10.0 - 23.0 Mean: 15.29 StdDev: 4.46 29.2%  |                |                |          |          |          |
| myelin basic protein (MBP)      | HGFLPR              | bi0169     | 726.4      | 2      | 363.7           | 385.3  | y3                | 16  | 16  | 16  | 12  | 19  | 23  | 12                                                             | 363.7 / 385.3 Range: 12.0 - 23.0 Mean: 16.29 StdDev: 3.86 23.7%  |                                                                  |                |                |          |          |          |
|                                 |                     |            |            |        | 363.7           | 532.3  | y4                | 12  | 16  | 16  | 17  | 19  | 23  | 8                                                              |                                                                  | 363.7 / 532.3 Range: 8.0 - 23.0 Mean: 15.86 StdDev: 4.81 30.3%   |                |                |          |          |          |
|                                 |                     |            |            |        | 363.7           | 589.4  | y5                | 8   | 14  | 11  | 19  | 12  | 23  | 10                                                             |                                                                  | 363.7 / 589.4 Range: 8.0 - 23.0 Mean: 13.86 StdDev: 5.34 38.5%   |                |                |          |          |          |
|                                 |                     |            |            |        | 366.7           | 391.3  | y3                | 16  | 16  | 16  | 12  | 19  | 23  | 12                                                             |                                                                  | 366.7 / 391.3 Range: 12.0 - 23.0 Mean: 16.29 StdDev: 3.86 23.7%  |                |                |          |          |          |
|                                 |                     |            |            |        | 366.7           | 538.3  | y4                | 12  | 16  | 16  | 17  | 19  | 23  | 8                                                              |                                                                  | 366.7 / 538.3 Range: 8.0 - 23.0 Mean: 15.86 StdDev: 4.81 30.3%   |                |                |          |          |          |
|                                 |                     |            |            |        | 366.7           | 595.4  | y5                | 8   | 14  | 11  | 19  | 12  | 23  | 10                                                             |                                                                  | 366.7 / 595.4 Range: 8.0 - 23.0 Mean: 13.86 StdDev: 5.34 38.5%   |                |                |          |          |          |
| prostate specific antigen (PSA) | IVGGWECamcEK        | bi0161     | 1077.5     | 2      | 539.3           | 808.3  | y6                | 12  | 14  | 20  | 21  | 13  | 23  | 12                                                             | 539.3 / 808.3 Range: 12.0 - 23.0 Mean: 16.43 StdDev: 4.72 28.7%  |                                                                  |                |                |          |          |          |
|                                 |                     |            |            |        | 539.3           | 865.4  | y7                | 14  | 14  | 20  | 16  | 13  | 23  | 14                                                             |                                                                  | 539.3 / 865.4 Range: 13.0 - 23.0 Mean: 16.29 StdDev: 3.77 23.2%  |                |                |          |          |          |
|                                 |                     |            |            |        | 539.3           | 964.42 | y8                | 16  | 16  | 22  | 18  | 14  | 23  | 16                                                             |                                                                  | 539.3 / 964.42 Range: 14.0 - 23.0 Mean: 17.96 StdDev: 3.39 19.0% |                |                |          |          |          |
|                                 |                     |            |            |        | 541.7           | 808.33 | y6                | 12  | 14  | 20  | 21  | 13  | 23  | 12                                                             |                                                                  | 541.7 / 808.33 Range: 12.0 - 23.0 Mean: 16.43 StdDev: 4.72 28.7% |                |                |          |          |          |
|                                 |                     |            |            |        | 541.7           | 865.35 | y7                | 14  | 14  | 20  | 16  | 13  | 23  | 14                                                             |                                                                  | 541.7 / 865.35 Range: 13.0 - 23.0 Mean: 16.29 StdDev: 3.77 23.2% |                |                |          |          |          |
|                                 |                     |            |            |        | 541.7           | 969.44 | y8                | 16  | 16  | 22  | 18  | 14  | 23  | 16                                                             |                                                                  | 541.7 / 969.44 Range: 14.0 - 23.0 Mean: 17.96 StdDev: 3.39 19.0% |                |                |          |          |          |
| horseradish peroxidase (HRP)    | SSDLVALSGGHTFGK     | bi0166     | 1475.7     | 3      | 492.6           | 703.35 | y7                | 10  | 14  | 16  | 18  | 11  | 23  | 12                                                             | 492.6 / 703.35 Range: 10.0 - 23.0 Mean: 14.86 StdDev: 4.56 30.7% |                                                                  |                |                |          |          |          |
|                                 |                     |            |            |        | 492.6           | 790.38 | y8                | 12  | 14  | 17  | 20  | 11  | 23  | 14                                                             |                                                                  | 492.6 / 790.38 Range: 11.0 - 23.0 Mean: 15.86 StdDev: 4.38 27.6% |                |                |          |          |          |
|                                 |                     |            |            |        | 492.6           | 974.51 | y10               | 15  | 16  | 24  | 17  | 11  | 23  | 10                                                             |                                                                  | 492.6 / 974.51 Range: 10.0 - 24.0 Mean: 16.57 StdDev: 5.38 32.5% |                |                |          |          |          |
|                                 |                     |            |            |        | 495.3           | 711.37 | y7                | 10  | 14  | 16  | 18  | 11  | 23  | 12                                                             |                                                                  | 495.3 / 711.37 Range: 10.0 - 23.0 Mean: 14.86 StdDev: 4.56 30.7% |                |                |          |          |          |
|                                 |                     |            |            |        | 495.3           | 798.4  | y8                | 12  | 14  | 17  | 20  | 11  | 23  | 14                                                             |                                                                  | 495.3 / 798.4 Range: 11.0 - 23.0 Mean: 15.86 StdDev: 4.38 27.6%  |                |                |          |          |          |
|                                 |                     |            |            |        | 495.3           | 982.52 | y10               | 15  | 16  | 24  | 17  | 11  | 23  | 10                                                             |                                                                  | 495.3 / 982.52 Range: 10.0 - 24.0 Mean: 16.57 StdDev: 5.38 32.5% |                |                |          |          |          |
| C-reactive Protein (CRP)        | ESDTSYVSLK          | bi0231     | 1128.5     | 2      | 564.8           | 609.4  | y5                | 8   | 10  | 12  | 19  | 10  | 23  | 8                                                              | 564.8 / 609.4 Range: 8.0 - 23.0 Mean: 12.86 StdDev: 5.84 45.4%   |                                                                  |                |                |          |          |          |
|                                 |                     |            |            |        | 564.8           | 696.4  | y6                | 10  | 12  | 16  | 23  | 11  | 23  | 12                                                             |                                                                  | 564.8 / 696.4 Range: 10.0 - 23.0 Mean: 15.29 StdDev: 5.59 36.6%  |                |                |          |          |          |
|                                 |                     |            |            |        | 564.8           | 797.4  | y7                | 12  | 14  | 20  | 19  | 12  | 23  | 12                                                             |                                                                  | 564.8 / 797.4 Range: 12.0 - 23.0 Mean: 16.0 StdDev: 4.58 28.6%   |                |                |          |          |          |
|                                 |                     |            |            |        | 568.8           | 617.37 | y5                | 8   | 10  | 12  | 19  | 10  | 23  | 8                                                              |                                                                  | 568.8 / 617.37 Range: 8.0 - 23.0 Mean: 12.86 StdDev: 5.84 45.4%  |                |                |          |          |          |
|                                 |                     |            |            |        | 568.8           | 704.41 | y6                | 10  | 12  | 16  | 23  | 11  | 23  | 12                                                             |                                                                  | 568.8 / 704.41 Range: 10.0 - 23.0 Mean: 15.29 StdDev: 5.59 36.6% |                |                |          |          |          |
|                                 |                     |            |            |        | 568.8           | 805.45 | y7                | 12  | 14  | 20  | 19  | 12  | 23  | 12                                                             |                                                                  | 568.8 / 805.45 Range: 12.0 - 23.0 Mean: 16.0 StdDev: 4.58 28.6%  |                |                |          |          |          |
|                                 | GYSIFSYATK          | bi0202     | 1136.3     | 2      | 568.8           | 716.4  | y6                | 10  | 16  | 20  | 24  | 11  | 23  | 12                                                             | 568.8 / 716.4 Range: 10.0 - 24.0 Mean: 16.57 StdDev: 5.83 35.2%  |                                                                  |                |                |          |          |          |
|                                 |                     |            |            |        | 568.8           | 829.5  | y7                | 12  | 18  | 20  | 22  | 13  | 23  | 12                                                             |                                                                  | 568.8 / 829.5 Range: 12.0 - 23.0 Mean: 17.14 StdDev: 4.78 27.9%  |                |                |          |          |          |
|                                 |                     |            |            |        | 568.8           | 916.5  | y8                | 14  | 16  | 22  | 16  | 14  | 23  | 8                                                              |                                                                  | 568.8 / 916.5 Range: 8.0 - 23.0 Mean: 16.14 StdDev: 5.11 31.7%   |                |                |          |          |          |
|                                 |                     |            |            |        | 572.8           | 724.38 | y6                | 10  | 16  | 20  | 24  | 11  | 23  | 12                                                             |                                                                  | 572.8 / 724.38 Range: 10.0 - 24.0 Mean: 16.57 StdDev: 5.83 35.2% |                |                |          |          |          |
|                                 |                     |            |            |        | 572.8           | 837.46 | y7                | 12  | 18  | 20  | 22  | 13  | 23  | 12                                                             |                                                                  | 572.8 / 837.46 Range: 12.0 - 23.0 Mean: 17.14 StdDev: 4.78 27.9% |                |                |          |          |          |
|                                 |                     |            |            |        | 572.8           | 924.49 | y8                | 14  | 16  | 22  | 16  | 14  | 23  | 8                                                              |                                                                  | 572.8 / 924.49 Range: 8.0 - 23.0 Mean: 16.14 StdDev: 5.11 31.7%  |                |                |          |          |          |
| YEYQGEVFTKPOLWP                 | ni0001              | 1820.9     | 2          | 911    | 1053.5          | b9     | 16                | 25  | 24  | 19  | 25  | 23  | 16  | 911 / 1053.5 Range: 16.0 - 25.0 Mean: 21.14 StdDev: 4.06 19.2% |                                                                  |                                                                  |                |                |          |          |          |
|                                 |                     |            |            | 911    | 1181.6          | b10    | 18                | 25  | 32  | 22  | 25  | 23  | 16  |                                                                | 911 / 1181.6 Range: 16.0 - 32.0 Mean: 23.0 StdDev: 5.23 22.7%    |                                                                  |                |                |          |          |          |
|                                 |                     |            |            | 911    | 1519.8          | b13    | 18                | 25  | 38  | 29  | 25  | 23  | 16  |                                                                | 911 / 1519.8 Range: 16.0 - 38.0 Mean: 24.86 StdDev: 7.29 29.3%   |                                                                  |                |                |          |          |          |
|                                 |                     |            |            | 914    | 1053.49         | b9     | 16                | 25  | 24  | 19  | 25  | 23  | 16  |                                                                | 914 / 1053.49 Range: 16.0 - 25.0 Mean: 21.14 StdDev: 4.06 19.2%  |                                                                  |                |                |          |          |          |
|                                 |                     |            |            | 914    | 1181.58         | b10    | 18                | 25  | 32  | 22  | 25  | 23  | 16  |                                                                | 914 / 1181.58 Range: 16.0 - 32.0 Mean: 23.0 StdDev: 5.23 22.7%   |                                                                  |                |                |          |          |          |
|                                 |                     |            |            | 914    | 1525.8          | b13    | 18                | 25  | 38  | 29  | 25  | 23  | 16  |                                                                | 914 / 1525.8 Range: 16.0 - 38.0 Mean: 24.86 StdDev: 7.29 29.3%   |                                                                  |                |                |          |          |          |

**Footnote:** Instrument Parameters for MRM transitions were optimized for maximum transmission efficiency and sensitivity for individual instruments by infusion of unlabeled signature peptides. Optimized collision cell exit potential (CXP) are reported for 4000 QTRAP instruments for each MRM transition along with the corresponding instrument used at each site. The TSQ Quantum Ultra instrument at CPTAC site @86 is not included in this specific comparison, for TSQ Quantum Ultra instrument parameters see Supplementary Table 1B. Boldface type indicates labeled peptide internal standard with labeled amino acid in red.



**Supplementary Figure 1:** Measured concentration in fmol/ $\mu$ L in diluted plasma on log scale across sites and studies I, II, and III for the entire range (1-500 fmol/ $\mu$ L) of spiked in analytes. Protein concentration in  $\mu$ g/mL on x-axis is  $\mu$ g protein equivalent in 1 mL of neat plasma.

Box plots showing theoretical (spike in) concentration (x-axis) vs. measured log concentration (y-axis) for peptides. The plots enable evaluation and comparison of assay reproducibility across different sites and studies. The box plots for studies I and II are based on 4 replicate measurements, while those for study III summarize 12 measurements (4 each from III a, b and c). Data for each site is color coded, and organized by study and concentration. In addition to other observations, the plots clearly show progressively increasing variability, and decreasing recovery (resulting in lower measured concentrations) from study I - III. The box plots show the median as a white horizontal line. The box spans the interquartile range (IQR), with the whiskers extending to  $1.5 * \text{IQR}$ . Values beyond  $1.5 * \text{IQR}$  are deemed outliers, and shown as separate points.

Peptide APR-AGL

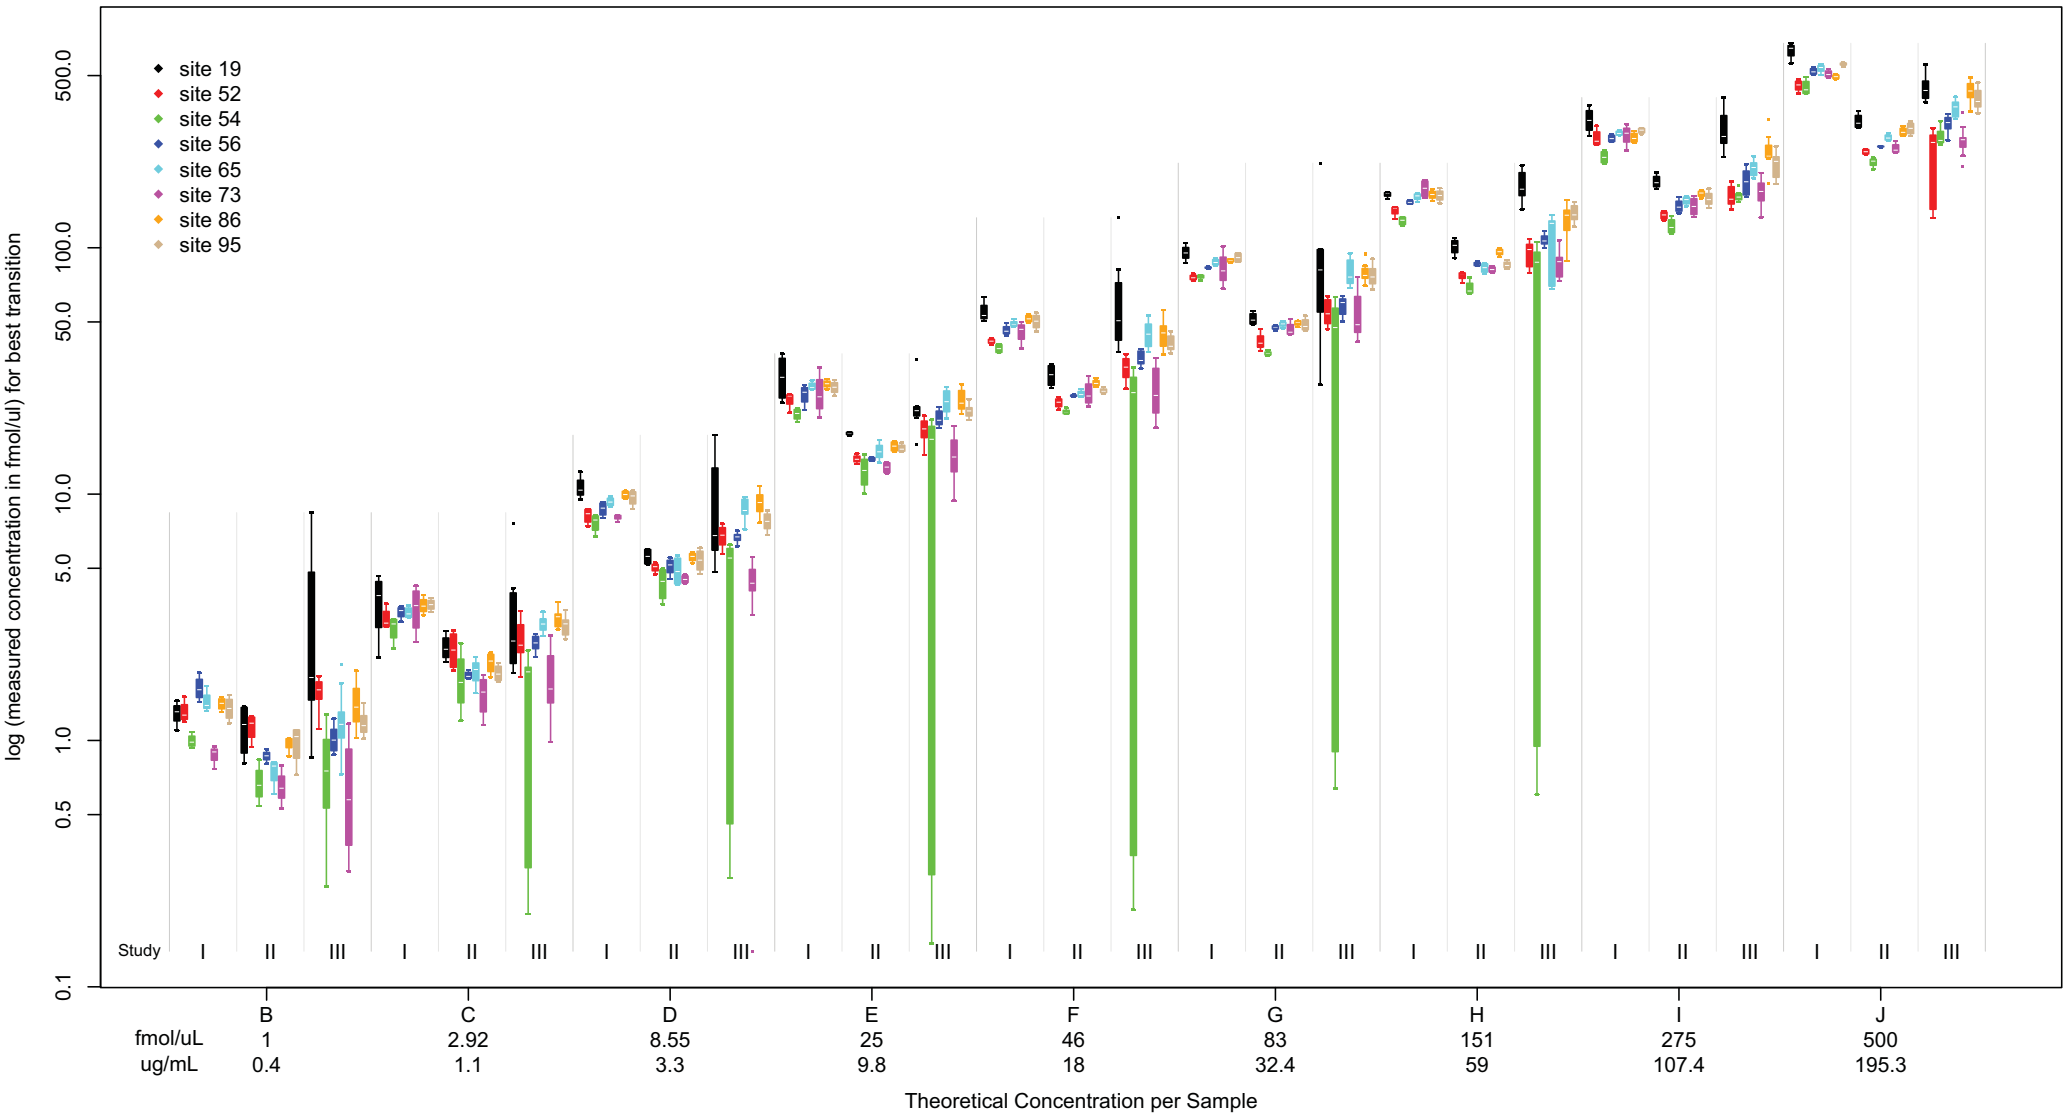

Peptide CRP-ESD

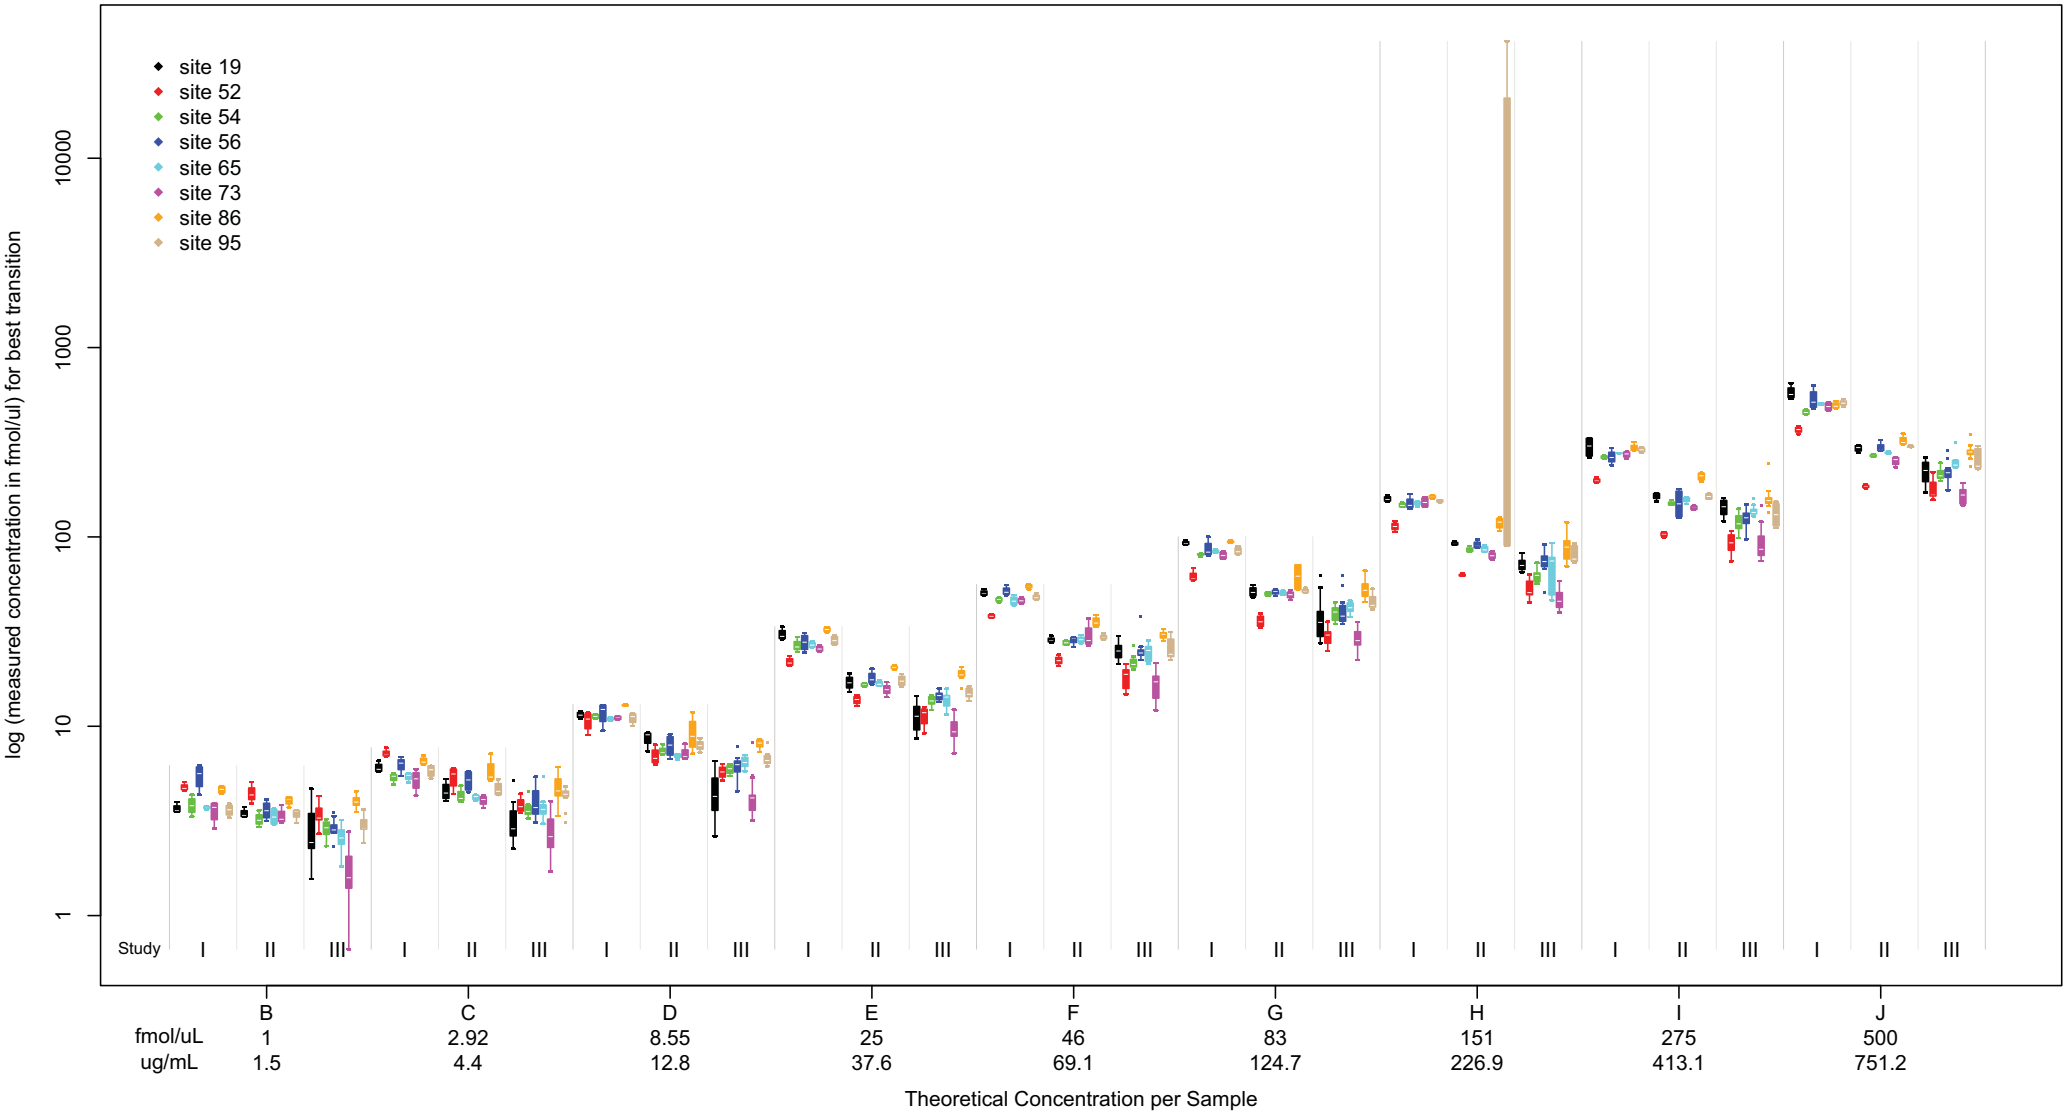

Peptide CRP-GYS

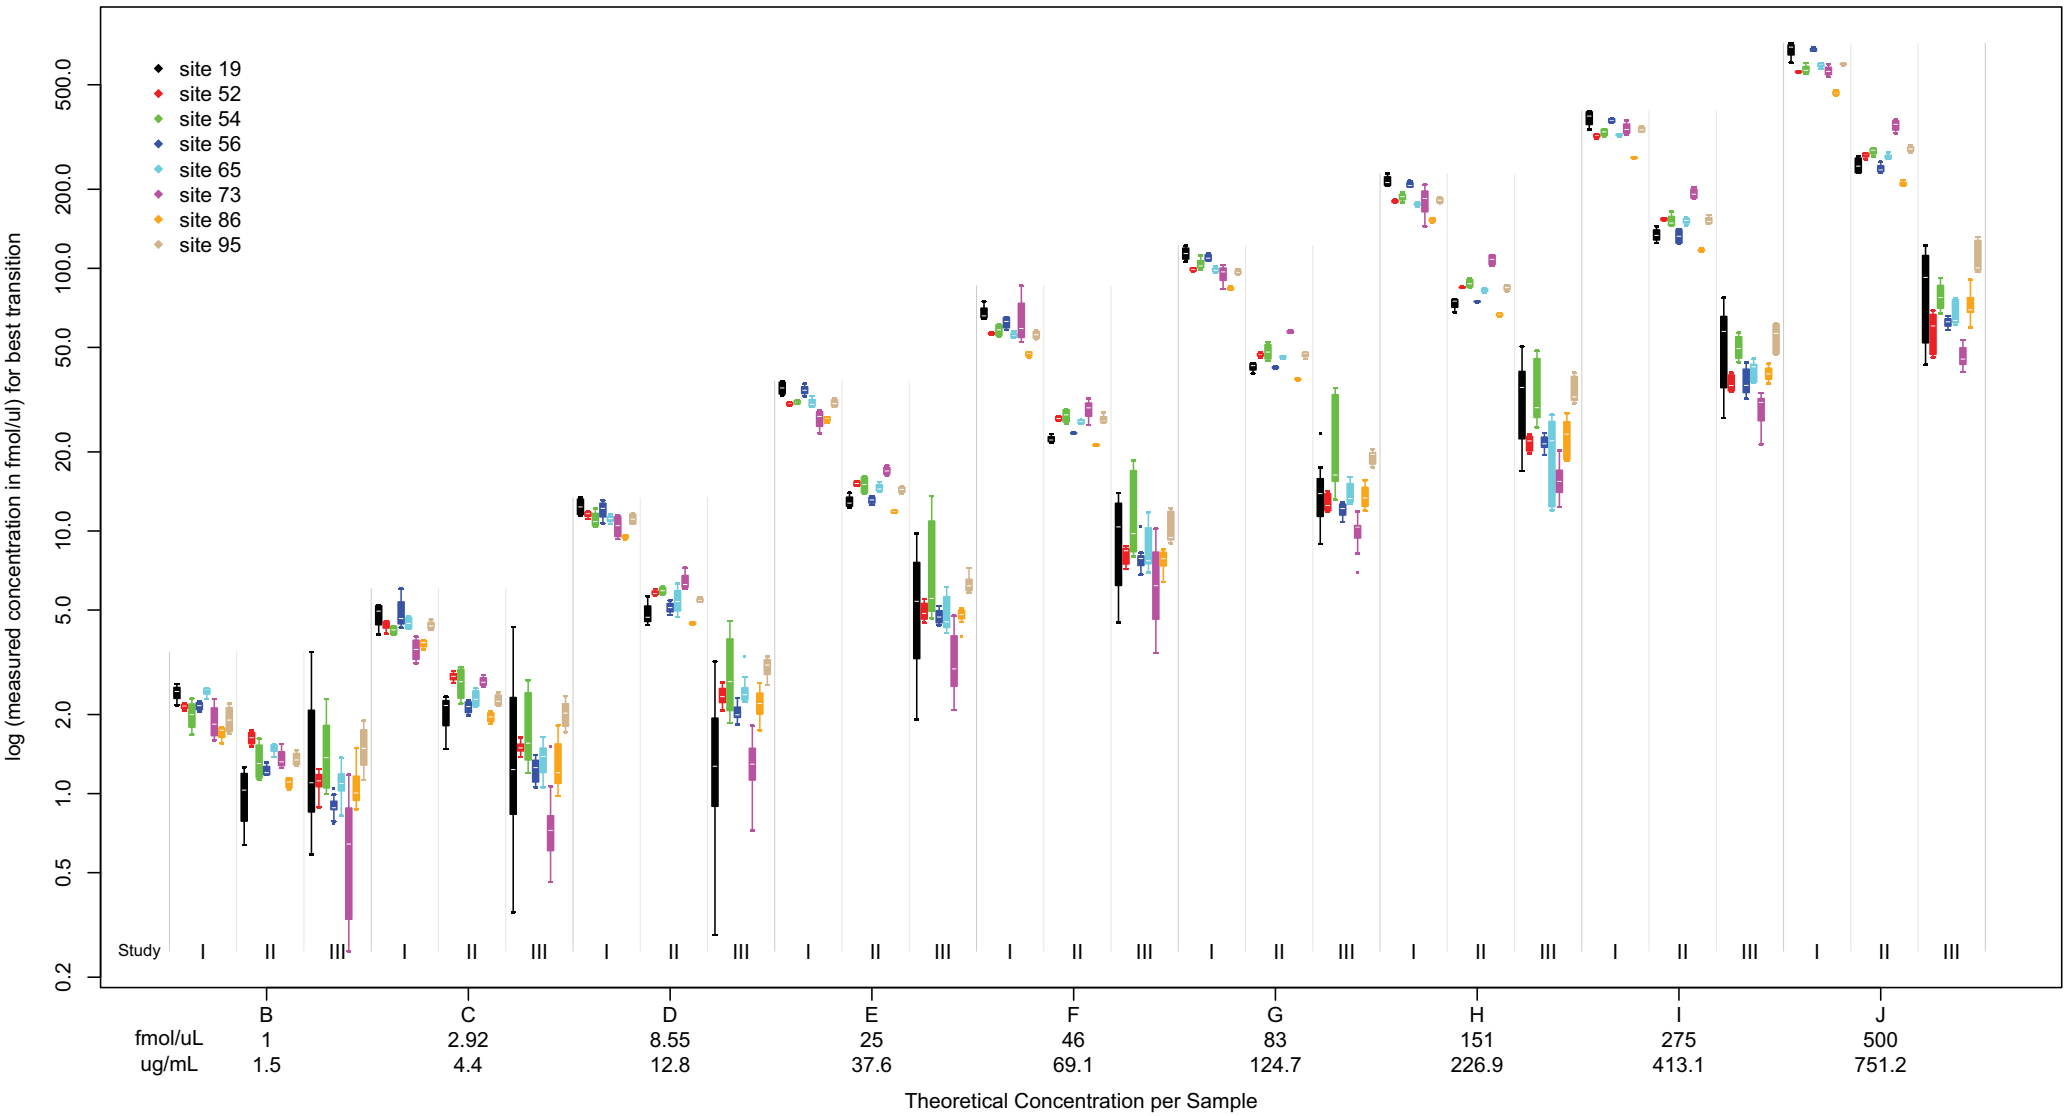

Peptide HRP-SSD

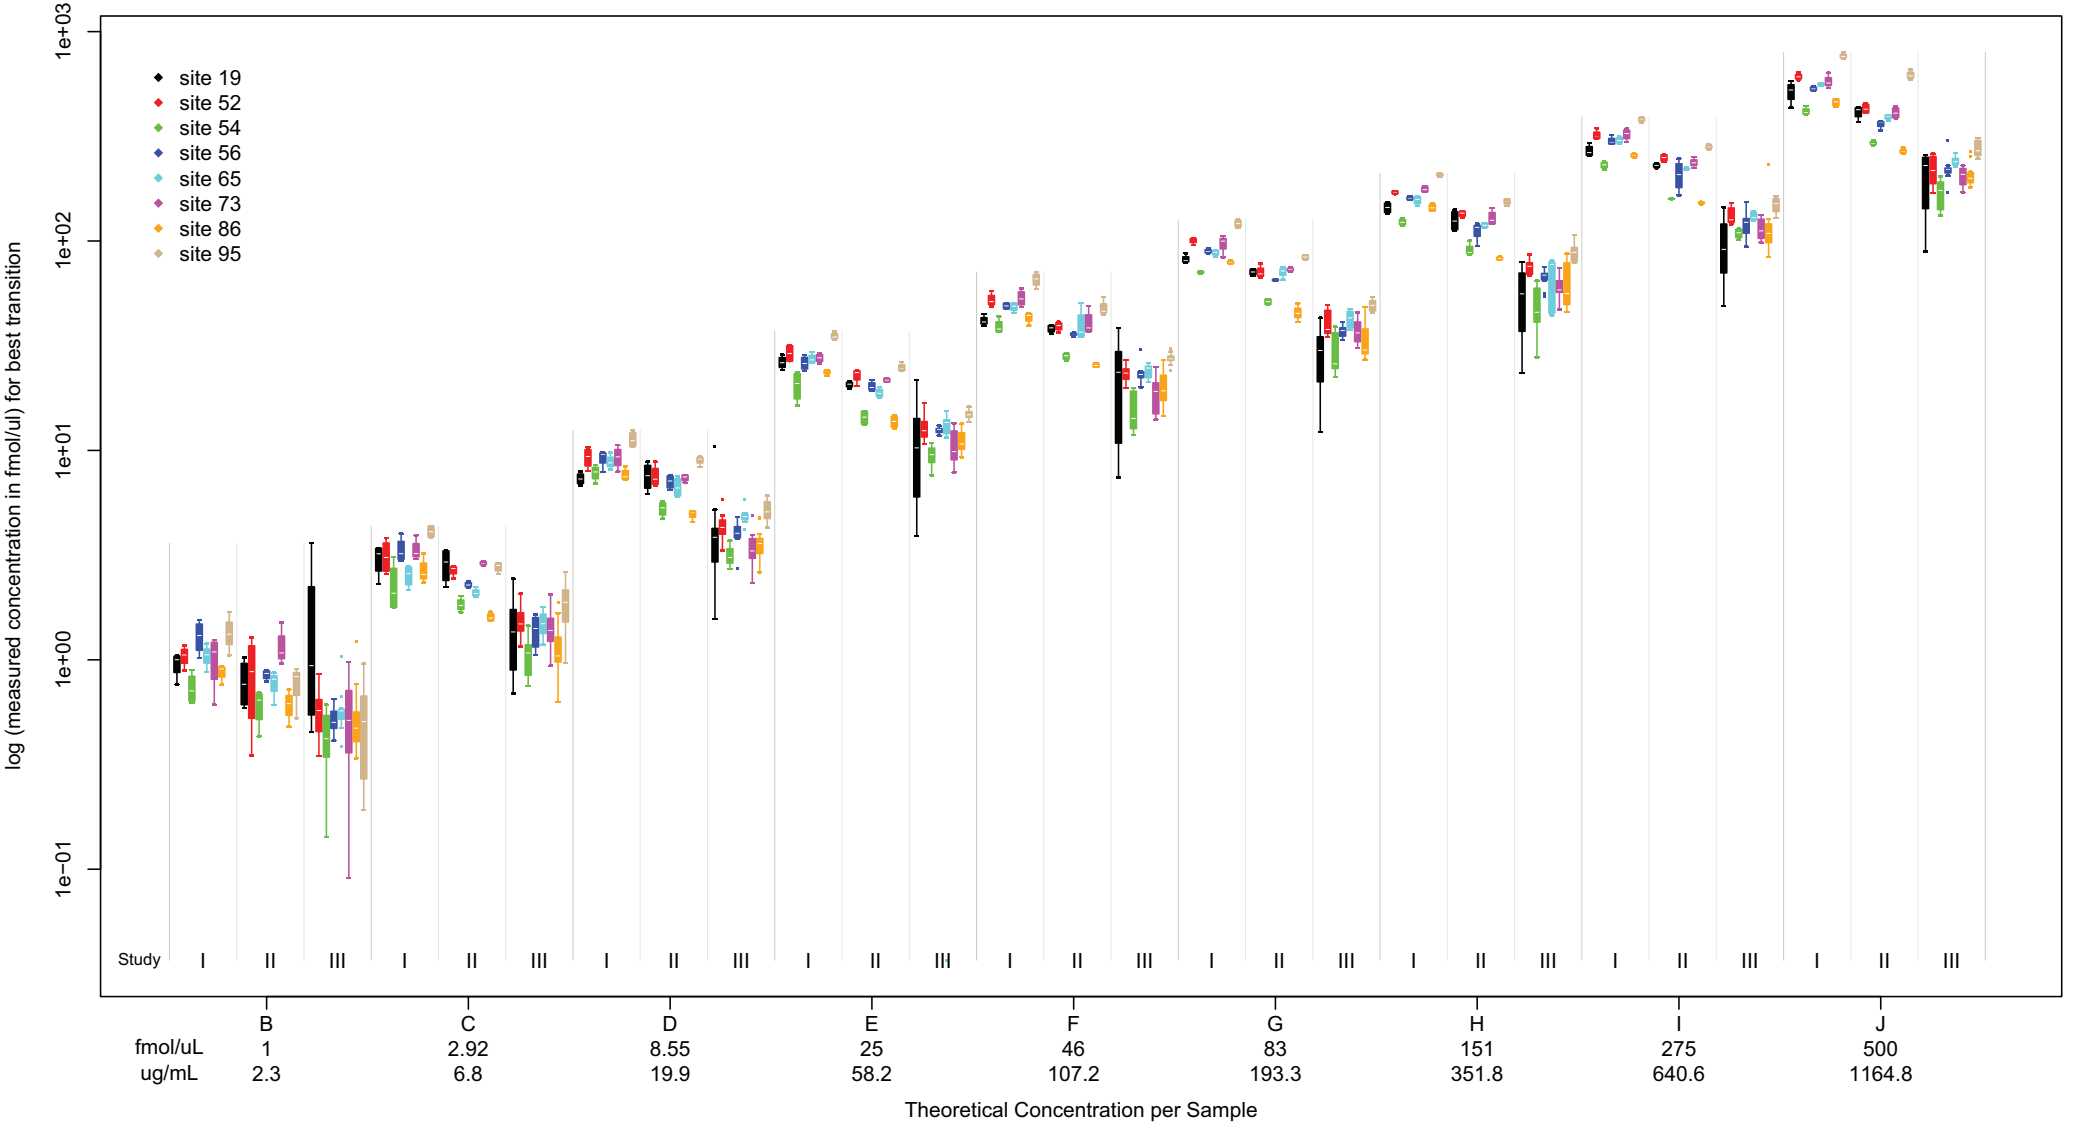

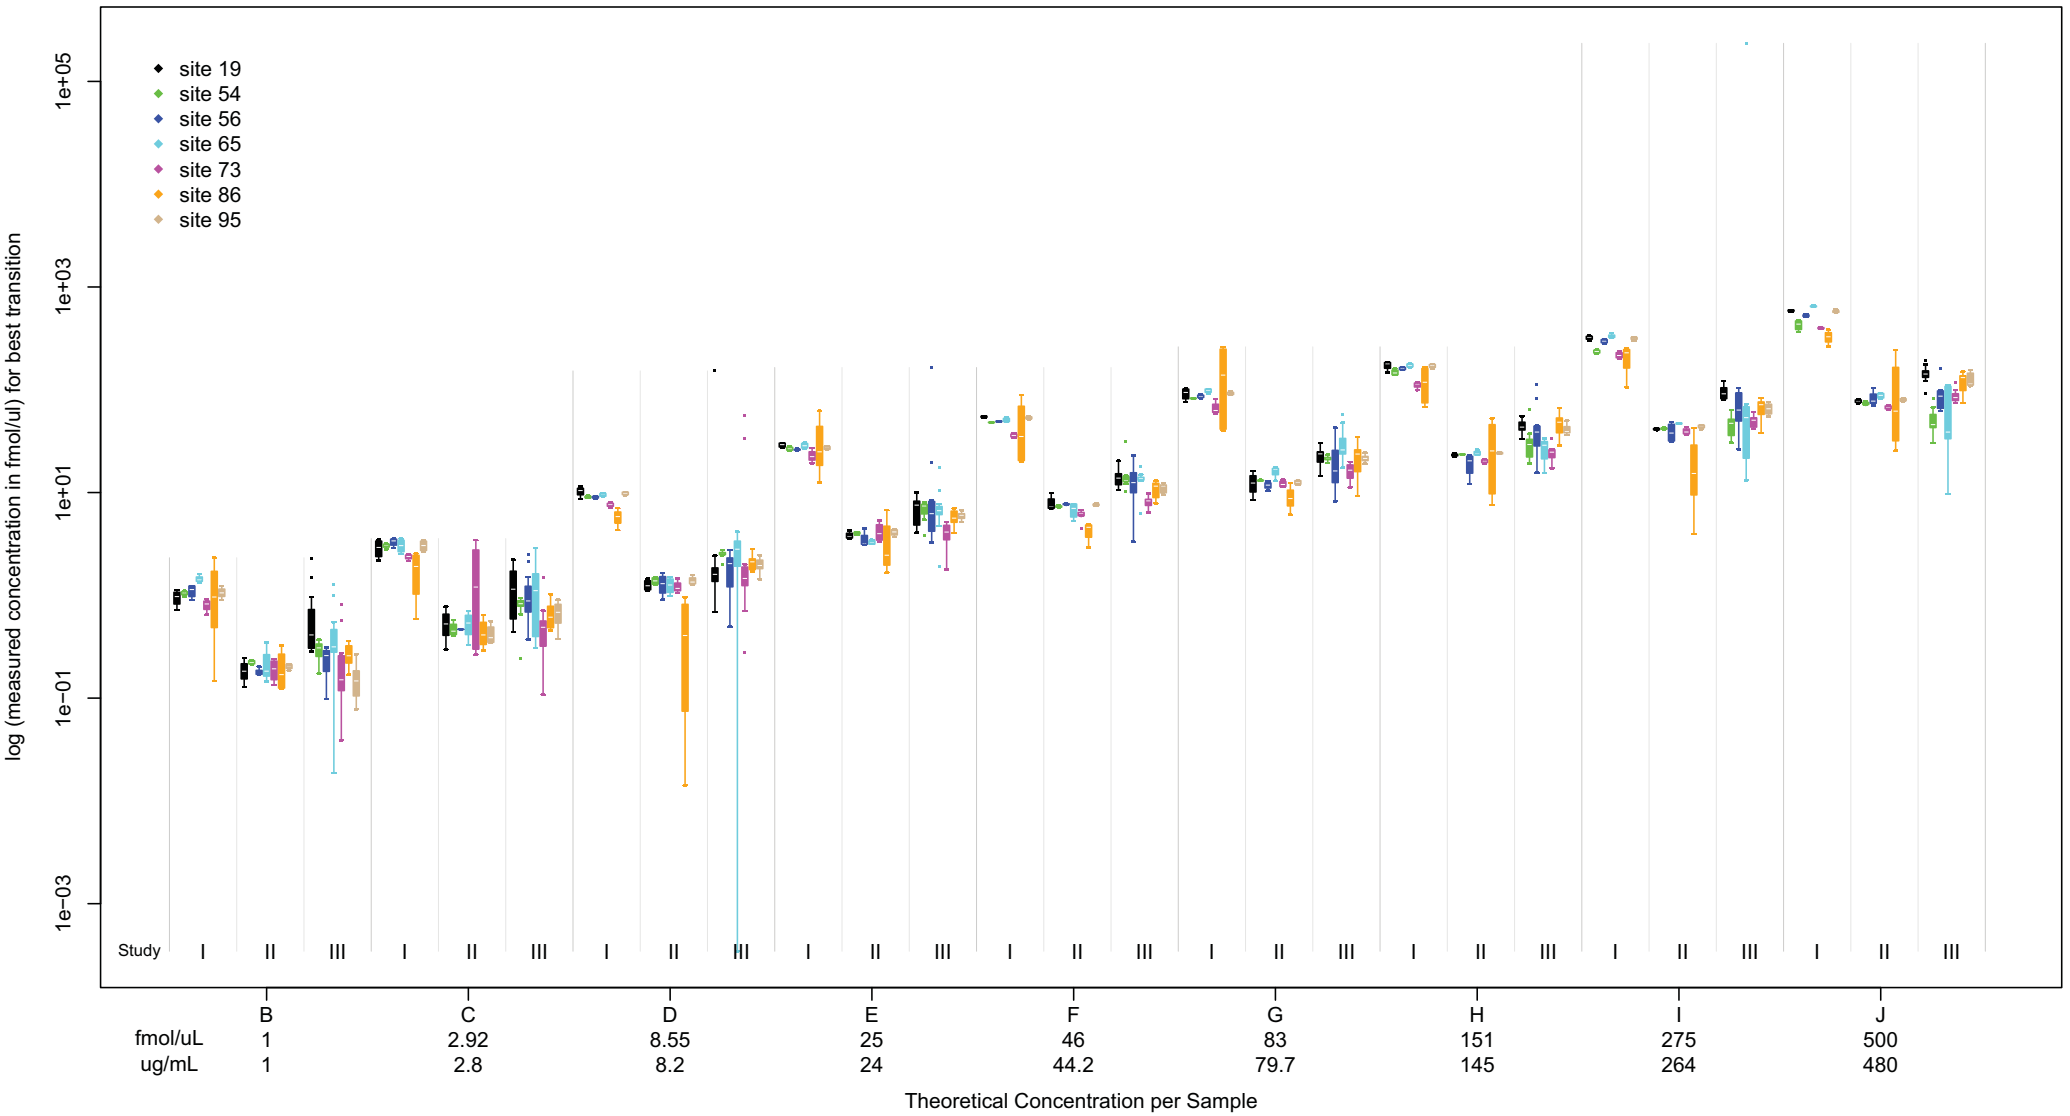

Peptide MBP-HGF

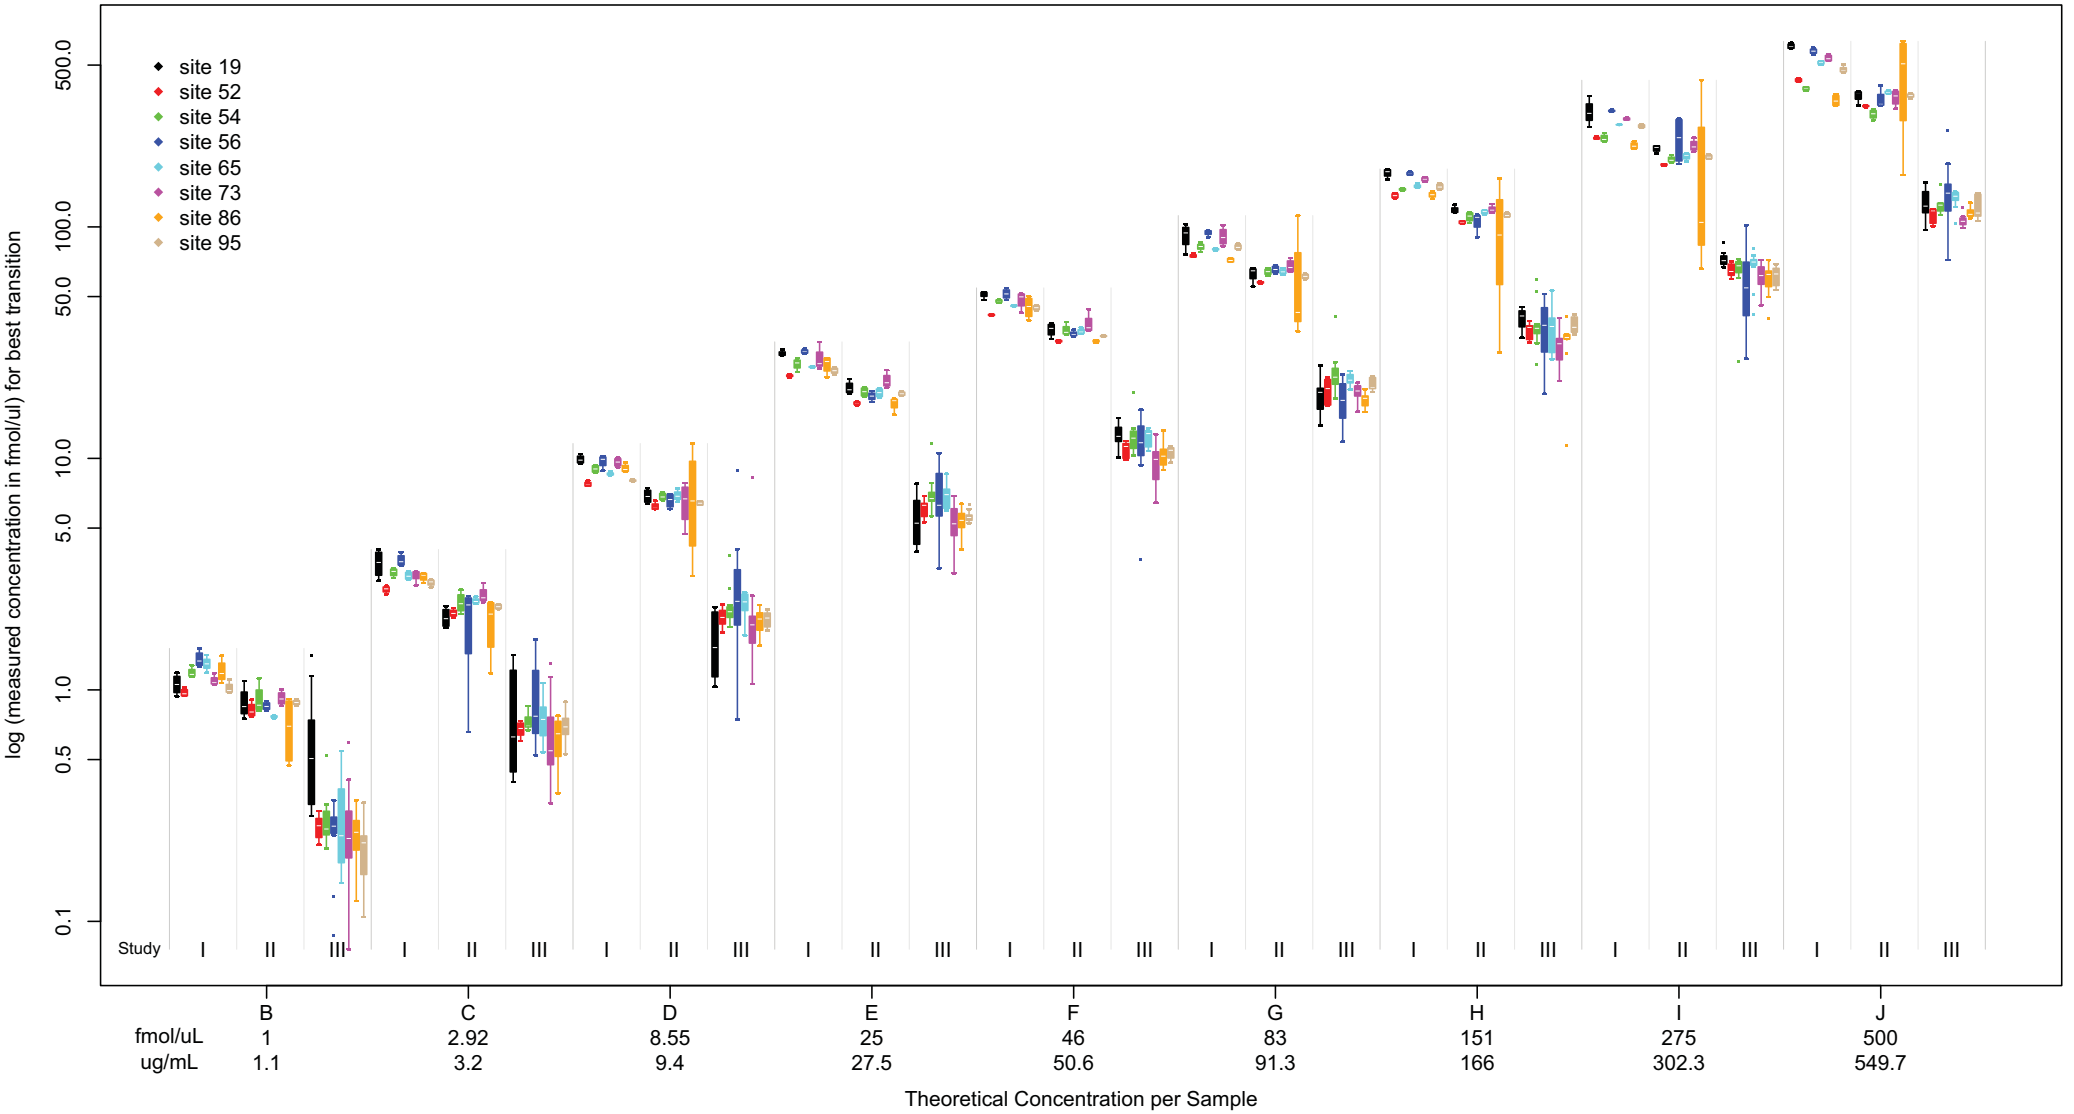

Peptide MBP-YLA

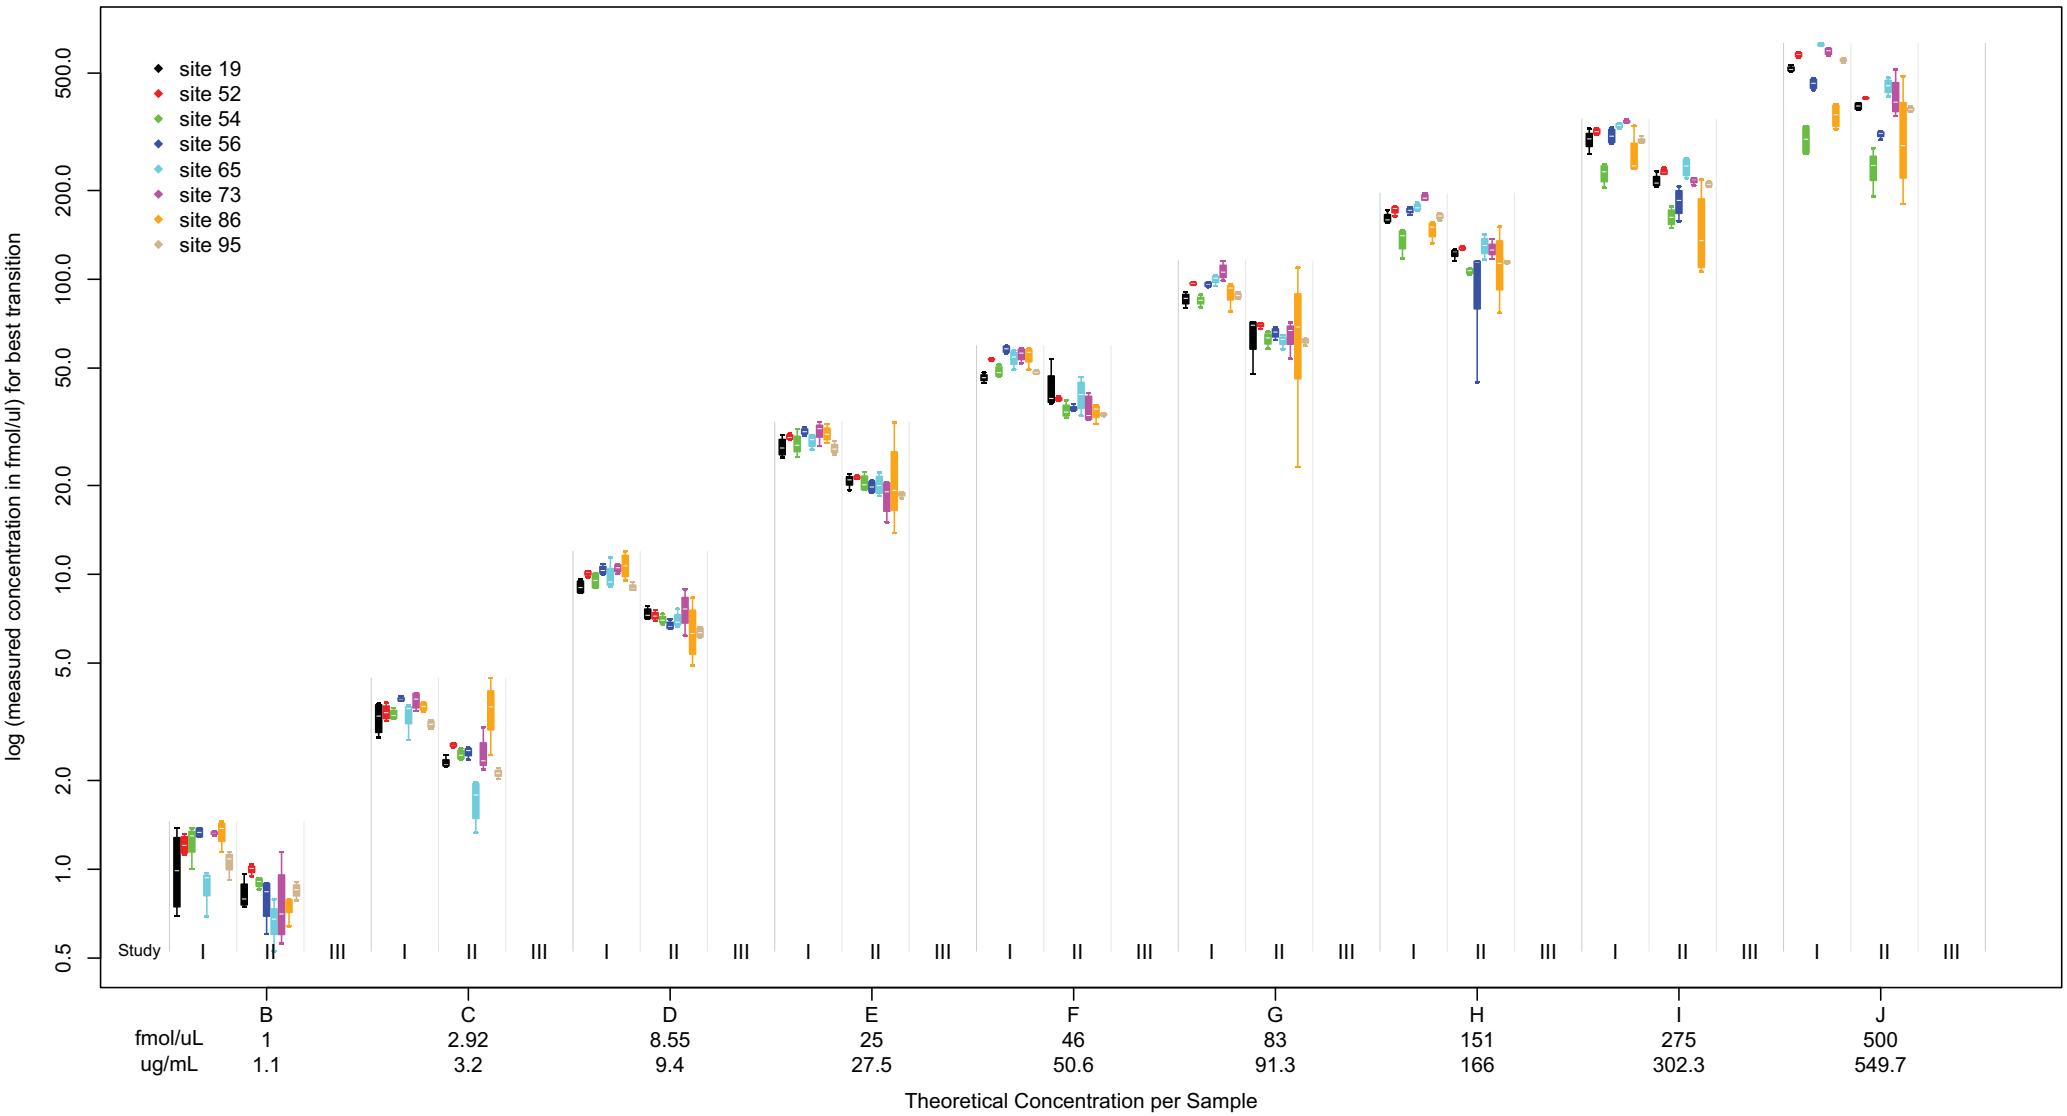



Peptide MYO-LFT

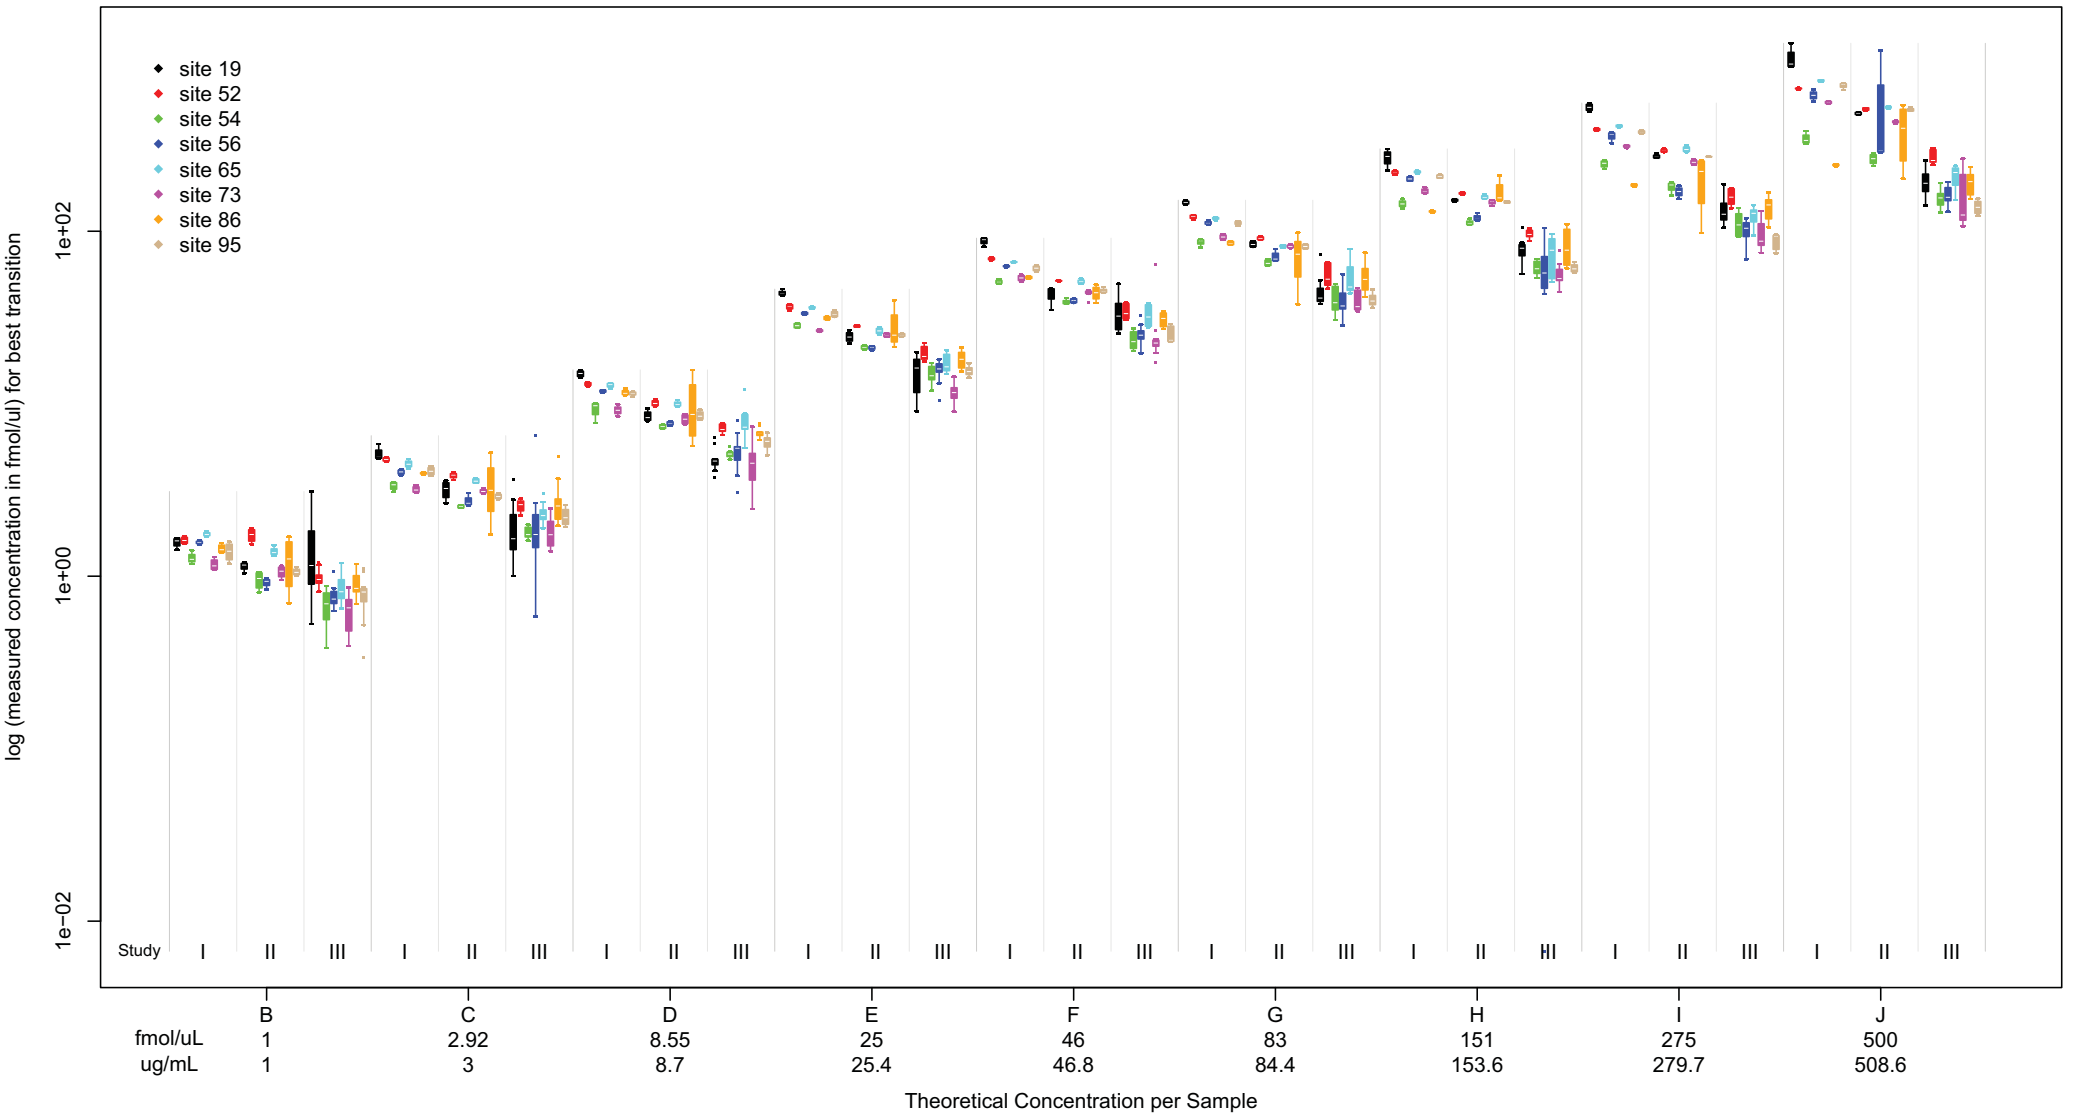

Peptide PSA-IVG

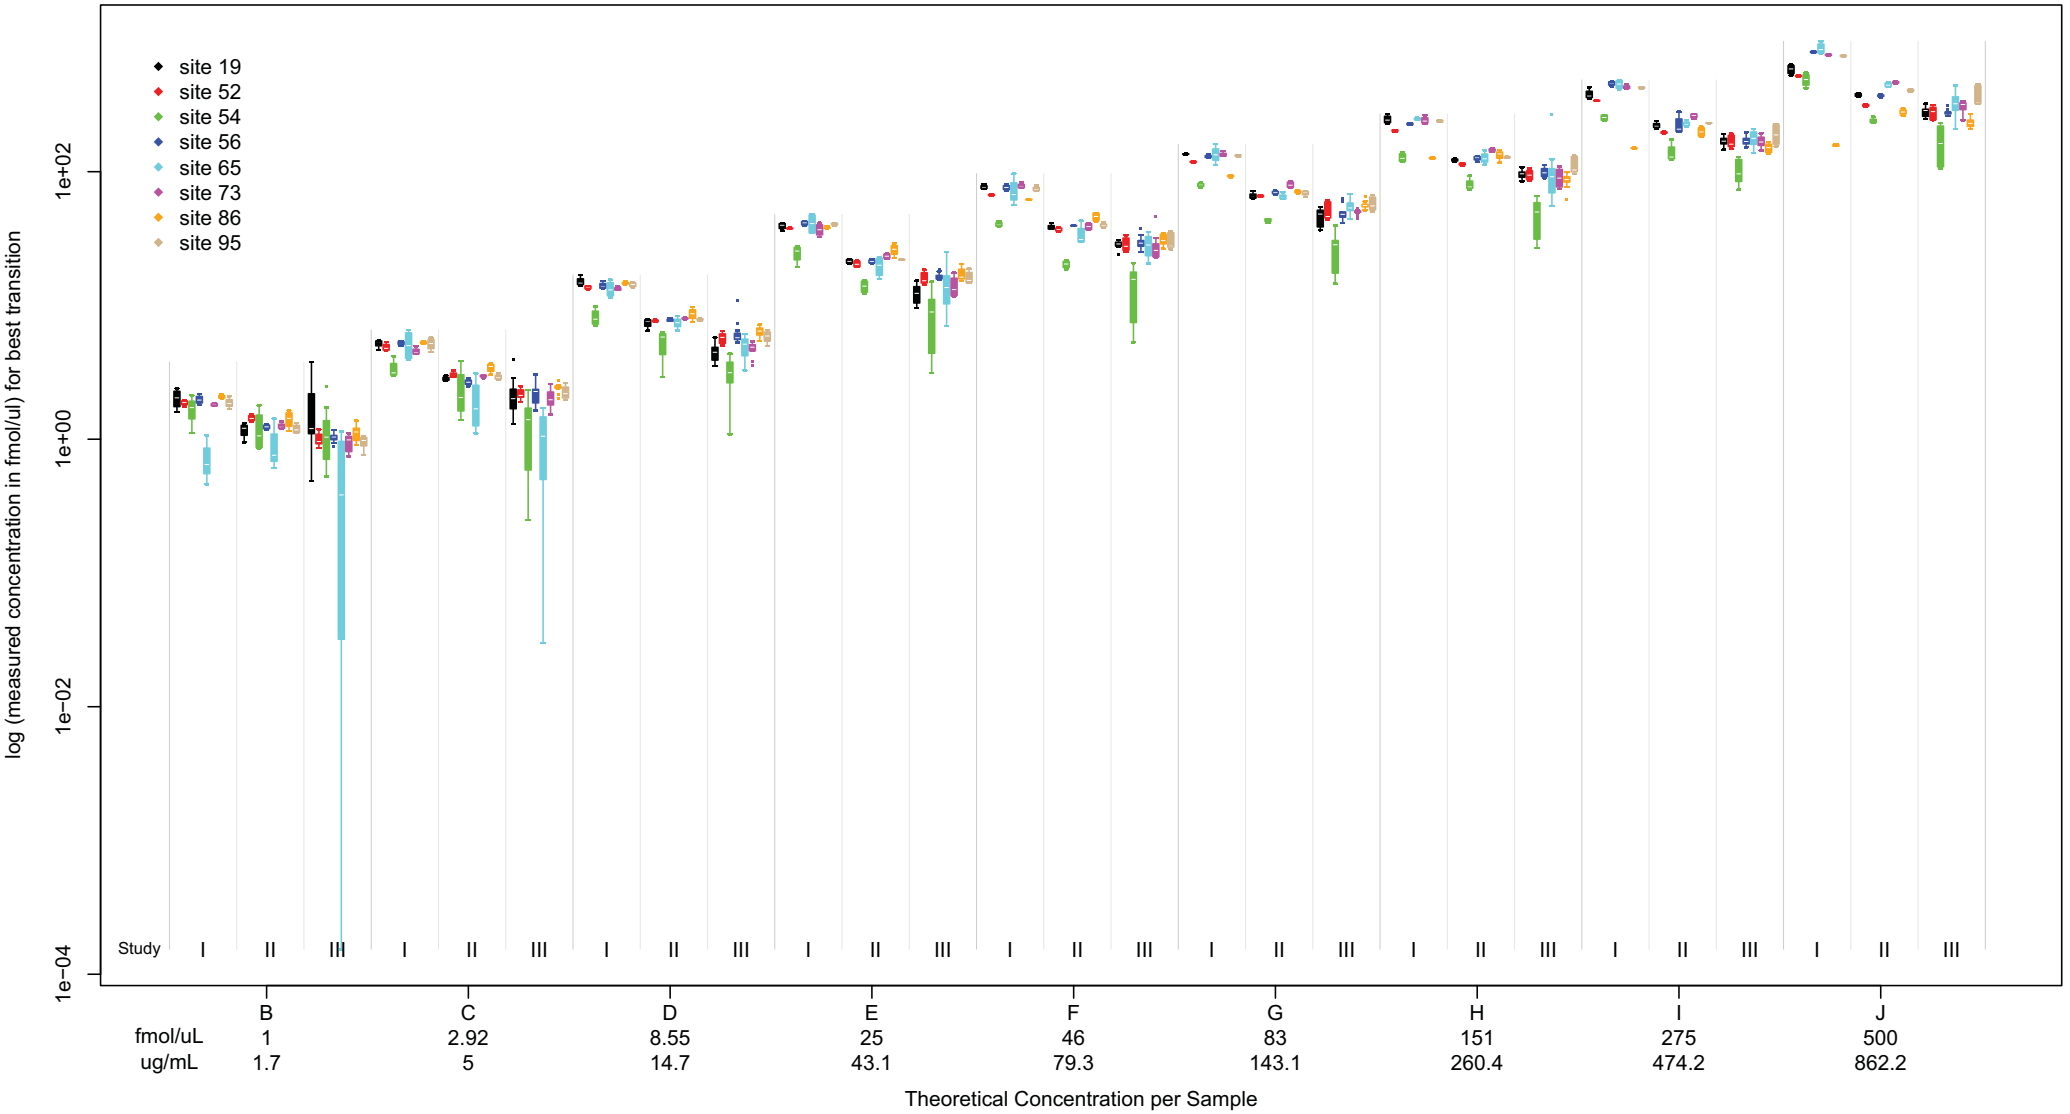

Peptide PSA-LSE

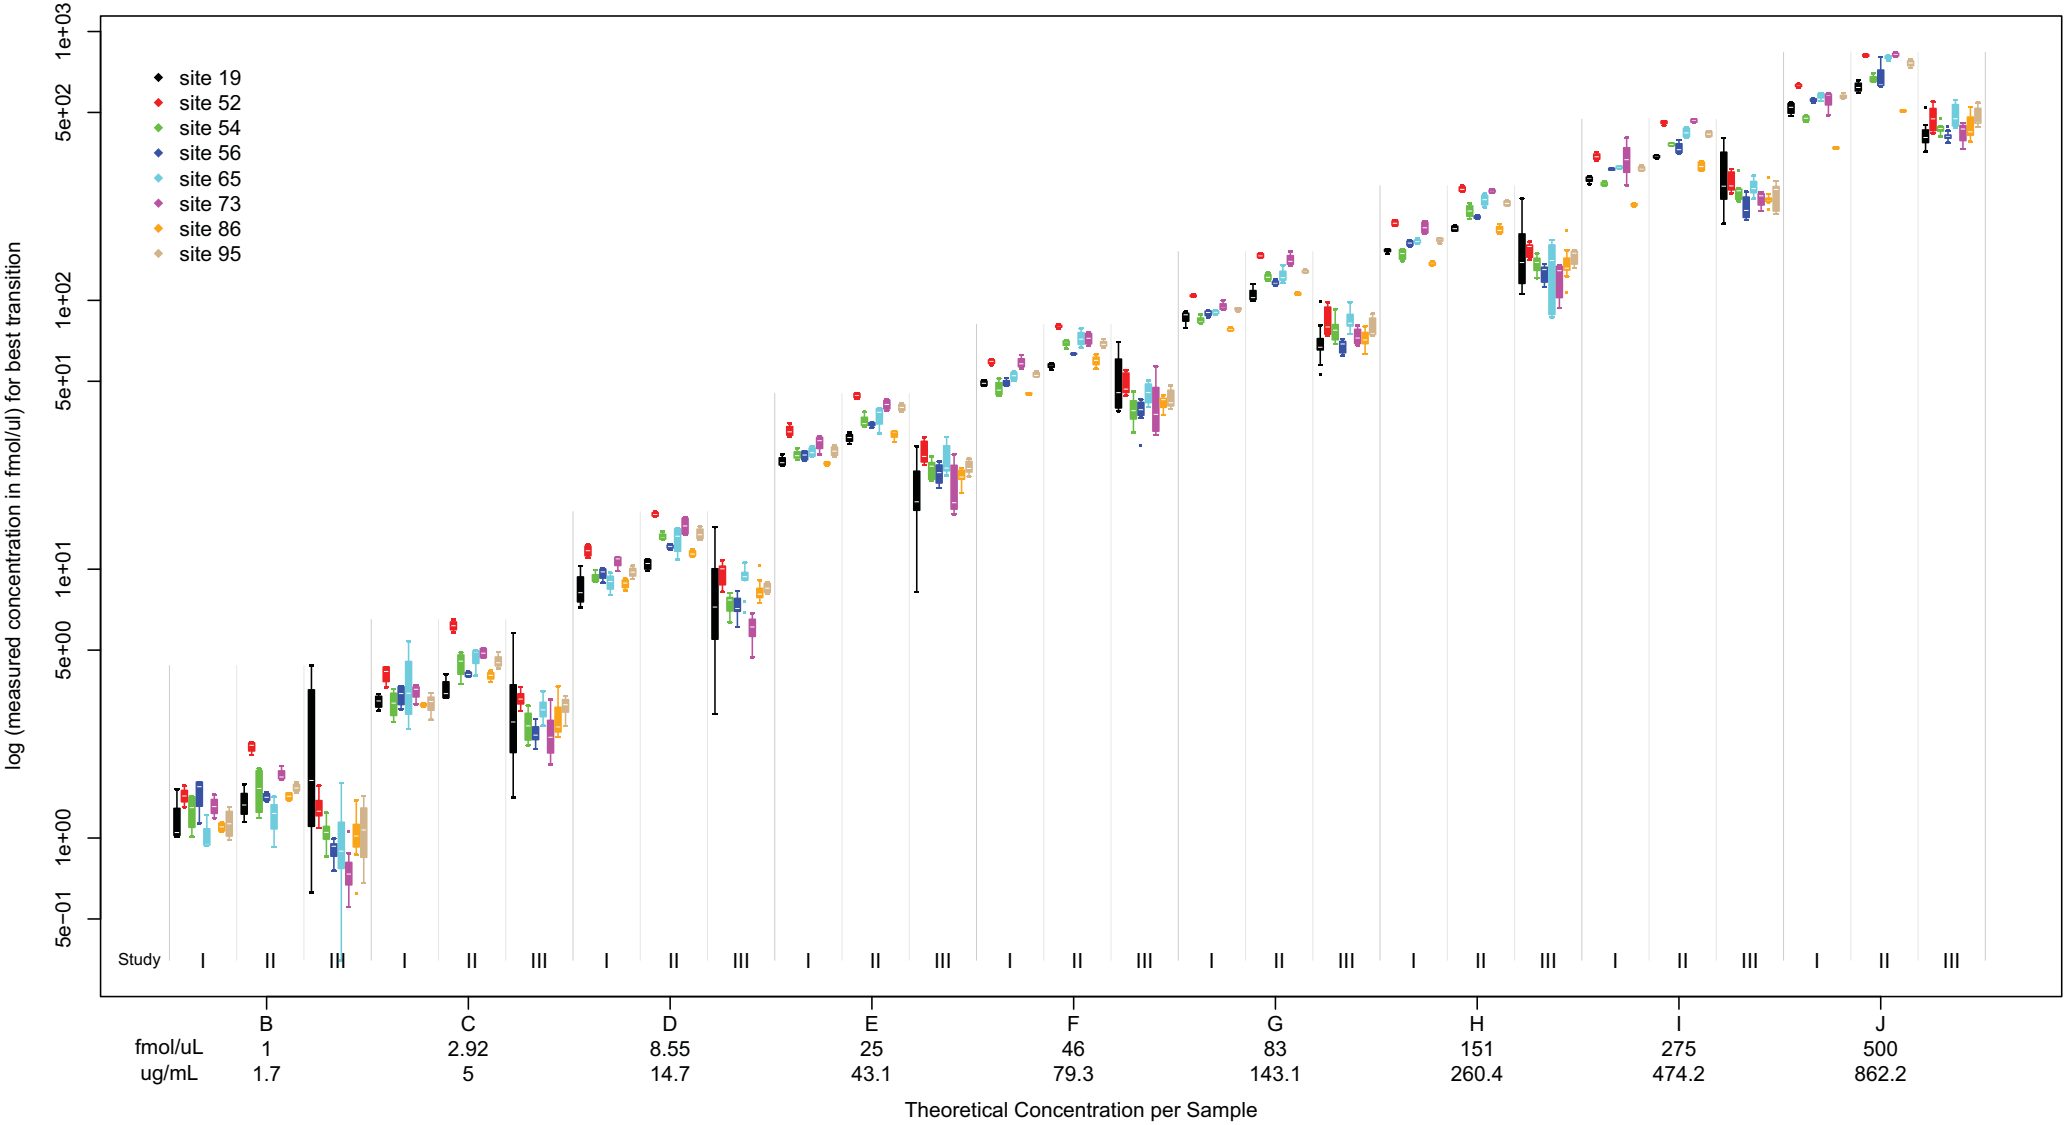

**Supplementary Table 2A:** Summary of inter-lab and intra-lab CVs for all peptides calculated across the concentration range of spiked analyte - Study I.  
(color code: CV's : 0-10%, CV's : 10-20%, CV's : 20-30%, and CV's ≥ 30%)

| Coefficient of variation, Study I |         |          |            |         |          |          |        |        |        |         |         |         |                  |                  |                     |  |
|-----------------------------------|---------|----------|------------|---------|----------|----------|--------|--------|--------|---------|---------|---------|------------------|------------------|---------------------|--|
| site                              | peptide | pro-pept | transition | B (1.0) | C (2.92) | D (8.55) | E (25) | F (46) | G (83) | H (151) | I (275) | J (500) | Min Intra-lab CV | Max Intra-lab CV | Median Intra-lab CV |  |
| 19                                | bi0037  | PSA-LSE  | 37tr3_A    | 20.94%  | 6.05%    | 15.56%   | 4.37%  | 2.20%  | 5.99%  | 1.87%   | 2.94%   | 5.17%   | 1.87%            | 20.94%           | 5.17%               |  |
| 52                                | bi0037  | PSA-LSE  | 37tr3_A    | 7.53%   | 8.07%    | 5.05%    | 4.98%  | 2.28%  | 0.95%  | 2.35%   | 3.11%   | 1.40%   | 0.95%            | 8.07%            | 3.11%               |  |
| 54                                | bi0037  | PSA-LSE  | 37tr3_A    | 15.91%  | 12.11%   | 4.88%    | 4.22%  | 6.76%  | 4.11%  | 4.87%   | 1.74%   | 2.28%   | 1.74%            | 15.91%           | 4.87%               |  |
| 56                                | bi0037  | PSA-LSE  | 37tr3_A    | 15.55%  | 9.30%    | 5.35%    | 4.29%  | 3.15%  | 2.62%  | 2.28%   | 0.92%   | 1.72%   | 0.92%            | 15.55%           | 3.15%               |  |
| 65                                | bi0037  | PSA-LSE  | 37tr2_A    | 15.41%  | 32.73%   | 7.89%    | 4.23%  | 3.51%  | 1.63%  | 1.79%   | 1.23%   | 3.10%   | 1.23%            | 32.73%           | 3.51%               |  |
| 73                                | bi0037  | PSA-LSE  | 37tr3_A    | 8.39%   | 6.98%    | 5.47%    | 6.88%  | 5.00%  | 3.70%  | 5.39%   | 16.48%  | 8.56%   | 3.70%            | 16.48%           | 6.88%               |  |
| 86                                | bi0037  | PSA-LSE  | 37tr3_A    | 3.87%   | 1.16%    | 4.32%    | 1.14%  | 0.81%  | 1.28%  | 1.59%   | 1.11%   | 0.68%   | 0.68%            | 4.32%            | 1.16%               |  |
| 95                                | bi0037  | PSA-LSE  | 37tr3_A    | 12.86%  | 9.33%    | 4.65%    | 4.33%  | 2.40%  | 1.34%  | 2.12%   | 2.24%   | 2.64%   | 1.34%            | 12.86%           | 2.64%               |  |
| Min Inter-lab CV                  |         |          |            | 3.87%   | 1.16%    | 4.32%    | 1.14%  | 0.81%  | 0.95%  | 1.59%   | 0.92%   | 0.68%   |                  |                  |                     |  |
| Max Inter-lab CV                  |         |          |            | 20.94%  | 32.73%   | 15.56%   | 6.88%  | 6.76%  | 5.99%  | 16.48%  | 8.56%   |         |                  |                  |                     |  |
| Median Inter-lab CV               |         |          |            | 14.14%  | 8.68%    | 5.20%    | 4.31%  | 2.78%  | 2.12%  | 2.20%   | 1.99%   | 2.46%   |                  |                  |                     |  |
| 19                                | bi0161  | PSA-IVG  | 161tr2_A   | 17.03%  | 7.10%    | 8.54%    | 5.65%  | 3.52%  | 0.74%  | 7.50%   | 8.78%   | 8.32%   | 0.74%            | 17.03%           | 7.50%               |  |
| 52                                | bi0161  | PSA-IVG  | 161tr2_A   | 4.74%   | 6.69%    | 2.72%    | 1.03%  | 1.25%  | 1.51%  | 1.21%   | 0.65%   | 1.20%   | 0.65%            | 6.69%            | 1.25%               |  |
| 54                                | bi0161  | PSA-IVG  | 161tr1_A   | 30.73%  | 16.37%   | 14.91%   | 15.02% | 4.18%  | 4.72%  | 7.94%   | 5.10%   | 11.46%  | 4.18%            | 30.73%           | 11.46%              |  |
| 56                                | bi0161  | PSA-IVG  | 161tr2_A   | 7.69%   | 3.53%    | 5.98%    | 3.72%  | 4.48%  | 2.70%  | 1.38%   | 3.64%   | 1.42%   | 1.38%            | 7.69%            | 3.64%               |  |
| 65                                | bi0161  | PSA-IVG  | 161tr1_A   | 43.11%  | 25.51%   | 13.94%   | 17.52% | 24.15% | 14.66% | 1.87%   | 7.78%   | 9.70%   | 1.87%            | 43.11%           | 14.66%              |  |
| 73                                | bi0161  | PSA-IVG  | 161tr2_A   | 2.34%   | 6.20%    | 3.33%    | 10.80% | 4.48%  | 4.17%  | 6.51%   | 3.43%   | 1.35%   | 1.35%            | 10.80%           | 4.17%               |  |
| 86                                | bi0161  | PSA-IVG  | 161tr2_A   | 3.24%   | 1.97%    | 2.27%    | 1.59%  | 0.77%  | 1.35%  | 1.09%   | 0.65%   | 1.59%   | 0.65%            | 3.24%            | 1.59%               |  |
| 95                                | bi0161  | PSA-IVG  | 161tr2_A   | 8.97%   | 10.33%   | 3.73%    | 1.97%  | 4.29%  | 1.12%  | 1.60%   | 1.16%   | 1.67%   | 1.12%            | 10.33%           | 1.97%               |  |
| Min Inter-lab CV                  |         |          |            | 2.34%   | 1.97%    | 2.27%    | 1.03%  | 0.77%  | 0.74%  | 1.09%   | 0.65%   | 1.20%   |                  |                  |                     |  |
| Max Inter-lab CV                  |         |          |            | 43.11%  | 25.51%   | 14.91%   | 17.52% | 24.15% | 14.66% | 7.94%   | 8.78%   | 11.46%  |                  |                  |                     |  |
| Median Inter-lab CV               |         |          |            | 8.33%   | 6.89%    | 4.86%    | 4.68%  | 4.24%  | 2.10%  | 1.73%   | 3.53%   | 1.63%   |                  |                  |                     |  |
| 19                                | bi0166  | HRP-SSD  | 166tr2_A   | 13.64%  | 17.20%   | 6.60%    | 7.14%  | 5.52%  | 4.74%  | 6.10%   | 6.43%   | 11.88%  | 4.74%            | 17.20%           | 6.60%               |  |
| 52                                | bi0166  | HRP-SSD  | 166tr3_A   | 11.24%  | 18.53%   | 11.27%   | 9.77%  | 7.49%  | 3.35%  | 1.68%   | 5.38%   | 3.46%   | 1.68%            | 18.53%           | 7.49%               |  |
| 54                                | bi0166  | HRP-SSD  | 166tr3_A   | 17.16%  | 27.59%   | 8.51%    | 16.81% | 7.96%  | 1.61%  | 3.60%   | 3.67%   | 4.15%   | 1.61%            | 27.59%           | 7.96%               |  |
| 56                                | bi0166  | HRP-SSD  | 166tr2_A   | 18.03%  | 13.95%   | 9.66%    | 7.93%  | 3.49%  | 2.60%  | 1.99%   | 4.74%   | 2.42%   | 1.99%            | 18.03%           | 4.74%               |  |
| 65                                | bi0166  | HRP-SSD  | 166tr3_A   | 15.46%  | 11.98%   | 7.73%    | 5.22%  | 4.72%  | 3.16%  | 4.92%   | 3.48%   | 1.40%   | 1.40%            | 15.46%           | 4.92%               |  |
| 73                                | bi0166  | HRP-SSD  | 166tr2_A   | 28.25%  | 11.88%   | 12.06%   | 4.87%  | 8.92%  | 9.69%  | 3.14%   | 6.18%   | 7.15%   | 3.14%            | 28.25%           | 8.92%               |  |
| 86                                | bi0166  | HRP-SSD  | 166tr3_A   | 8.89%   | 14.30%   | 6.91%    | 2.68%  | 6.06%  | 1.69%  | 4.30%   | 1.89%   | 4.32%   | 1.69%            | 14.30%           | 4.32%               |  |
| 95                                | bi0166  | HRP-SSD  | 166tr3_A   | 19.51%  | 6.42%    | 8.92%    | 3.98%  | 7.80%  | 3.90%  | 1.75%   | 2.84%   | 3.67%   | 1.75%            | 19.51%           | 3.98%               |  |
| Min Inter-lab CV                  |         |          |            | 8.89%   | 6.42%    | 6.60%    | 2.68%  | 3.49%  | 1.61%  | 1.68%   | 1.89%   | 1.40%   |                  |                  |                     |  |
| Max Inter-lab CV                  |         |          |            | 28.25%  | 27.59%   | 12.06%   | 16.81% | 8.92%  | 9.69%  | 6.10%   | 6.43%   | 11.88%  |                  |                  |                     |  |
| Median Inter-lab CV               |         |          |            | 16.31%  | 14.12%   | 8.72%    | 6.18%  | 6.77%  | 3.25%  | 4.20%   | 3.91%   |         |                  |                  |                     |  |
| 19                                | bi0167  | LEP-IND  | 167tr2_A   | 18.24%  | 20.85%   | 11.40%   | 5.25%  | 1.83%  | 13.53% | 10.27%  | 4.69%   | 1.74%   | 1.74%            | 20.85%           | 10.27%              |  |
| 52                                | bi0167  | LEP-IND  |            |         |          |          |        |        |        |         |         |         |                  |                  |                     |  |
| 54                                | bi0167  | LEP-IND  | 167tr2_A   | 5.16%   | 5.53%    | 2.41%    | 4.34%  | 0.94%  | 1.26%  | 6.64%   | 3.84%   | 11.75%  | 0.94%            | 11.75%           | 4.34%               |  |
| 56                                | bi0167  | LEP-IND  | 167tr1_A   | 14.49%  | 9.29%    | 2.72%    | 1.55%  | 0.83%  | 3.69%  | 2.89%   | 4.57%   | 2.45%   | 0.83%            | 14.49%           | 2.89%               |  |
| 65                                | bi0167  | LEP-IND  | 167tr1_A   | 9.97%   | 15.62%   | 3.71%    | 6.08%  | 4.68%  | 4.89%  | 3.72%   | 4.95%   | 1.22%   | 1.22%            | 15.62%           | 4.89%               |  |
| 73                                | bi0167  | LEP-IND  | 167tr1_A   | 13.90%  | 6.42%    | 4.94%    | 14.46% | 4.26%  | 15.38% | 7.64%   | 7.23%   | 1.70%   | 1.70%            | 15.38%           | 7.23%               |  |
| 86                                | bi0167  | LEP-IND  | 167tr1_A   | 82.72%  | 51.78%   | 19.51%   | 69.34% | 72.37% | 82.83% | 42.68%  | 32.95%  | 15.21%  | 15.21%           | 82.83%           | 51.78%              |  |
| 95                                | bi0167  | LEP-IND  | 167tr2_A   | 12.80%  | 12.52%   | 3.49%    | 3.69%  | 2.62%  | 3.21%  | 4.60%   | 3.47%   | 3.93%   | 2.62%            | 12.80%           | 3.69%               |  |
| Min Inter-lab CV                  |         |          |            | 5.16%   | 5.53%    | 2.41%    | 1.55%  | 0.83%  | 1.26%  | 2.89%   | 3.47%   | 1.22%   |                  |                  |                     |  |
| Max Inter-lab CV                  |         |          |            | 82.72%  | 51.78%   | 19.51%   | 69.34% | 72.37% | 82.83% | 42.68%  | 32.95%  | 15.21%  |                  |                  |                     |  |
| Median Inter-lab CV               |         |          |            | 13.90%  | 12.52%   | 3.71%    | 5.25%  | 2.62%  | 4.89%  | 6.64%   | 4.69%   | 2.45%   |                  |                  |                     |  |

| Coefficient of variation, Study I |         |          |            |            |             |             |           |           |           |            |            |            |                     |                     |                        |
|-----------------------------------|---------|----------|------------|------------|-------------|-------------|-----------|-----------|-----------|------------|------------|------------|---------------------|---------------------|------------------------|
| site                              | peptide | pro-pept | transition | B<br>(1.0) | C<br>(2.92) | D<br>(8.55) | E<br>(25) | F<br>(46) | G<br>(83) | H<br>(151) | I<br>(275) | J<br>(500) | Min<br>Intra-lab CV | Max<br>Intra-lab CV | Median<br>Intra-lab CV |
| 19                                | bi0169  | MBP-HGF  | 169tr3_A   | 10.23%     | 13.89%      | 4.40%       | 2.80%     | 3.57%     | 12.34%    | 4.44%      | 12.79%     | 2.64%      | 2.64%               | 13.89%              | 4.44%                  |
| 52                                | bi0169  | MBP-HGF  | 169tr3_A   | 4.00%      | 3.54%       | 2.61%       | 1.65%     | 0.78%     | 2.07%     | 2.32%      | 1.16%      | 1.65%      | 0.78%               | 4.00%               | 2.07%                  |
| 54                                | bi0169  | MBP-HGF  | 169tr3_A   | 5.15%      | 4.17%       | 3.76%       | 5.67%     | 1.38%     | 4.58%     | 1.07%      | 3.96%      | 1.80%      | 1.07%               | 5.67%               | 3.96%                  |
| 56                                | bi0169  | MBP-HGF  | 169tr3_A   | 8.18%      | 6.03%       | 6.19%       | 2.08%     | 5.12%     | 3.15%     | 1.53%      | 0.82%      | 2.89%      | 0.82%               | 8.18%               | 3.15%                  |
| 65                                | bi0169  | MBP-HGF  | 169tr3_A   | 8.75%      | 4.08%       | 1.69%       | 0.51%     | 0.59%     | 0.94%     | 1.82%      | 0.18%      | 1.73%      | 0.18%               | 8.75%               | 1.69%                  |
| 73                                | bi0169  | MBP-HGF  | 169tr3_A   | 6.32%      | 6.50%       | 4.34%       | 12.48%    | 8.46%     | 9.12%     | 2.07%      | 1.15%      | 3.24%      | 1.15%               | 12.48%              | 6.32%                  |
| 86                                | bi0169  | MBP-HGF  | 169tr3_A   | 11.86%     | 4.51%       | 4.25%       | 8.70%     | 10.78%    | 2.06%     | 3.15%      | 3.43%      | 5.73%      | 2.06%               | 11.86%              | 4.51%                  |
| 95                                | bi0169  | MBP-HGF  | 169tr3_A   | 6.19%      | 3.32%       | 0.85%       | 3.14%     | 2.42%     | 2.55%     | 2.85%      | 1.56%      | 4.27%      | 0.85%               | 6.19%               | 2.85%                  |
| Min Inter-lab CV                  |         |          |            | 4.00%      | 3.32%       | 0.85%       | 0.51%     | 0.59%     | 0.94%     | 1.07%      | 0.18%      | 1.65%      |                     |                     |                        |
| Max Inter-lab CV                  |         |          |            | 11.86%     | 13.89%      | 6.19%       | 12.48%    | 10.78%    | 12.34%    | 4.44%      | 12.79%     | 5.73%      |                     |                     |                        |
| Median Inter-lab CV               |         |          |            | 7.25%      | 4.34%       | 4.00%       | 2.97%     | 2.99%     | 2.85%     | 2.20%      | 1.36%      | 2.77%      |                     |                     |                        |
| 19                                | bi0170  | MBP-YLA  | 170tr2_A   | 31.76%     | 12.75%      | 5.30%       | 7.69%     | 3.39%     | 5.21%     | 4.41%      | 8.10%      | 2.08%      | 2.08%               | 31.76%              | 5.30%                  |
| 52                                | bi0170  | MBP-YLA  | 170tr2_A   | 7.63%      | 6.24%       | 2.11%       | 2.04%     | 0.70%     | 1.10%     | 3.39%      | 2.38%      | 1.97%      | 0.70%               | 7.63%               | 2.11%                  |
| 54                                | bi0170  | MBP-YLA  | 170tr2_A   | 13.24%     | 3.99%       | 6.42%       | 9.02%     | 4.43%     | 4.95%     | 9.71%      | 8.06%      | 11.80%     | 3.99%               | 13.24%              | 8.06%                  |
| 56                                | bi0170  | MBP-YLA  | 170tr2_A   | 3.85%      | 1.77%       | 3.50%       | 2.77%     | 2.76%     | 1.86%     | 2.61%      | 6.06%      | 4.27%      | 1.77%               | 6.06%               | 4.27%                  |
| 65                                | bi0170  | MBP-YLA  | 170tr3_A   | 17.61%     | 11.97%      | 10.88%      | 5.07%     | 6.24%     | 3.61%     | 2.82%      | 1.95%      | 0.91%      | 0.91%               | 17.61%              | 5.07%                  |
| 73                                | bi0170  | MBP-YLA  | 170tr2_A   | 1.82%      | 6.72%       | 3.39%       | 7.76%     | 5.28%     | 6.54%     | 2.60%      | 1.43%      | 2.74%      | 1.43%               | 7.76%               | 3.39%                  |
| 86                                | bi0170  | MBP-YLA  | 170tr2_A   | 10.13%     | 3.45%       | 10.17%      | 6.27%     | 7.25%     | 9.28%     | 7.21%      | 17.38%     | 9.65%      | 3.45%               | 17.38%              | 9.28%                  |
| 95                                | bi0170  | MBP-YLA  | 170tr2_A   | 9.15%      | 2.87%       | 3.00%       | 4.46%     | 1.25%     | 2.27%     | 2.13%      | 2.51%      | 1.90%      | 1.25%               | 9.15%               | 2.51%                  |
| Min Inter-lab CV                  |         |          |            | 1.82%      | 1.77%       | 2.11%       | 2.04%     | 0.70%     | 1.10%     | 2.27%      | 1.43%      | 0.91%      |                     |                     |                        |
| Max Inter-lab CV                  |         |          |            | 31.76%     | 12.75%      | 10.88%      | 9.02%     | 7.25%     | 9.28%     | 9.71%      | 17.38%     | 11.80%     |                     |                     |                        |
| Median Inter-lab CV               |         |          |            | 9.64%      | 5.12%       | 4.40%       | 5.67%     | 3.91%     | 4.28%     | 3.10%      | 4.29%      | 2.41%      |                     |                     |                        |
| 19                                | bi0171  | MYO-LFT  | 171tr1_A   | 6.72%      | 9.58%       | 4.35%       | 3.81%     | 5.08%     | 2.53%     | 11.70%     | 5.05%      | 15.73%     | 2.53%               | 15.73%              | 5.08%                  |
| 52                                | bi0171  | MYO-LFT  | 171tr1_A   | 4.85%      | 2.59%       | 2.39%       | 3.71%     | 1.57%     | 2.74%     | 2.56%      | 1.56%      | 0.91%      | 0.91%               | 4.85%               | 2.56%                  |
| 54                                | bi0171  | MYO-LFT  | 171tr2_A   | 7.69%      | 5.68%       | 11.61%      | 3.30%     | 2.65%     | 5.82%     | 5.35%      | 5.06%      | 7.66%      | 2.65%               | 11.61%              | 5.68%                  |
| 56                                | bi0171  | MYO-LFT  | 171tr1_A   | 2.42%      | 3.28%       | 1.50%       | 1.52%     | 1.11%     | 2.64%     | 3.18%      | 6.43%      | 6.57%      | 1.11%               | 6.57%               | 2.64%                  |
| 65                                | bi0171  | MYO-LFT  | 171tr3_A   | 4.01%      | 5.25%       | 3.25%       | 1.36%     | 0.59%     | 1.71%     | 1.63%      | 1.47%      | 1.21%      | 0.59%               | 5.25%               | 1.63%                  |
| 73                                | bi0171  | MYO-LFT  | 171tr1_A   | 8.01%      | 4.49%       | 6.51%       | 1.49%     | 4.10%     | 3.17%     | 3.77%      | 1.86%      | 1.75%      | 1.49%               | 8.01%               | 3.77%                  |
| 86                                | bi0171  | MYO-LFT  | 171tr1_A   | 6.08%      | 1.44%       | 3.90%       | 2.25%     | 1.57%     | 2.53%     | 1.09%      | 1.49%      | 1.25%      | 1.09%               | 6.08%               | 1.57%                  |
| 95                                | bi0171  | MYO-LFT  | 171tr1_A   | 12.90%     | 5.69%       | 2.85%       | 4.17%     | 3.73%     | 2.68%     | 2.35%      | 2.10%      | 4.92%      | 2.10%               | 12.90%              | 3.73%                  |
| Min Inter-lab CV                  |         |          |            | 2.42%      | 1.44%       | 1.50%       | 1.36%     | 0.59%     | 1.71%     | 1.09%      | 1.47%      | 0.91%      |                     |                     |                        |
| Max Inter-lab CV                  |         |          |            | 12.90%     | 9.58%       | 11.61%      | 4.17%     | 5.08%     | 5.82%     | 11.70%     | 6.43%      | 15.73%     |                     |                     |                        |
| Median Inter-lab CV               |         |          |            | 6.40%      | 4.87%       | 3.58%       | 2.77%     | 2.11%     | 2.66%     | 2.87%      | 1.98%      | 3.33%      |                     |                     |                        |
| 19                                | bi0173  | APR-AGL  | 173tr2_A   | 11.24%     | 29.51%      | 11.18%      | 21.77%    | 10.22%    | 7.65%     | 2.76%      | 12.09%     | 7.89%      | 2.76%               | 29.51%              | 11.18%                 |
| 52                                | bi0173  | APR-AGL  | 173tr3_A   | 10.53%     | 10.49%      | 7.41%       | 7.88%     | 2.68%     | 2.75%     | 5.17%      | 8.46%      | 5.50%      | 2.68%               | 10.53%              | 7.41%                  |
| 54                                | bi0173  | APR-AGL  | 173tr2_A   | 6.46%      | 12.20%      | 8.84%       | 5.60%     | 4.22%     | 2.81%     | 4.01%      | 6.04%      | 7.47%      | 2.81%               | 12.20%              | 6.04%                  |
| 56                                | bi0173  | APR-AGL  | 173tr2_A   | 11.74%     | 6.07%       | 6.72%       | 9.70%     | 5.03%     | 0.77%     | 1.65%      | 3.44%      | 3.17%      | 0.77%               | 11.74%              | 5.03%                  |
| 65                                | bi0173  | APR-AGL  | 173tr3_A   | 12.72%     | 5.36%       | 4.20%       | 3.95%     | 3.14%     | 3.01%     | 3.51%      | 2.19%      | 4.20%      | 2.19%               | 12.72%              | 3.95%                  |
| 73                                | bi0173  | APR-AGL  | 173tr3_A   | 10.75%     | 21.96%      | 2.91%       | 19.92%    | 10.24%    | 16.58%    | 8.29%      | 9.99%      | 3.61%      | 2.91%               | 21.96%              | 10.24%                 |
| 86                                | bi0173  | APR-AGL  | 173tr2_A   | 5.98%      | 7.82%       | 3.79%       | 3.90%     | 3.68%     | 1.70%     | 4.44%      | 4.97%      | 1.93%      | 1.70%               | 7.82%               | 3.90%                  |
| 95                                | bi0173  | APR-AGL  | 173tr2_A   | 11.24%     | 5.35%       | 7.55%       | 6.18%     | 7.40%     | 4.37%     | 5.81%      | 2.62%      | 1.91%      | 1.91%               | 11.24%              | 5.81%                  |
| Min Inter-lab CV                  |         |          |            | 5.98%      | 5.35%       | 2.91%       | 3.90%     | 2.68%     | 0.77%     | 1.65%      | 2.19%      | 1.91%      |                     |                     |                        |
| Max Inter-lab CV                  |         |          |            | 12.72%     | 29.51%      | 11.18%      | 21.77%    | 10.24%    | 16.58%    | 8.29%      | 12.09%     | 7.89%      |                     |                     |                        |
| Median Inter-lab CV               |         |          |            | 10.99%     | 9.16%       | 7.07%       | 7.03%     | 4.62%     | 2.91%     | 4.23%      | 5.51%      | 3.91%      |                     |                     |                        |

| Coefficient of variation, Study I |         |          |            |            |             |             |           |           |           |            |            |            |                     |                     |                        |
|-----------------------------------|---------|----------|------------|------------|-------------|-------------|-----------|-----------|-----------|------------|------------|------------|---------------------|---------------------|------------------------|
| site                              | peptide | pro-pept | transition | B<br>(1.0) | C<br>(2.92) | D<br>(8.55) | E<br>(25) | F<br>(46) | G<br>(83) | H<br>(151) | I<br>(275) | J<br>(500) | Min<br>Intra-lab CV | Max<br>Intra-lab CV | Median<br>Intra-lab CV |
| 19                                | bi0202  | CRP-GYS  | 202tr3_A   | 7.69%      | 11.40%      | 7.82%       | 6.11%     | 7.11%     | 6.08%     | 4.94%      | 7.24%      | 7.26%      | 4.94%               | 11.40%              | 7.24%                  |
| 52                                | bi0202  | CRP-GYS  | 202tr3_A   | 2.54%      | 5.05%       | 2.70%       | 1.44%     | 0.96%     | 1.43%     | 1.06%      | 1.66%      | 0.70%      | 0.70%               | 5.05%               | 1.44%                  |
| 54                                | bi0202  | CRP-GYS  | 202tr3_A   | 13.28%     | 4.17%       | 7.41%       | 1.58%     | 5.29%     | 6.42%     | 3.65%      | 3.17%      | 4.03%      | 1.58%               | 13.28%              | 4.17%                  |
| 56                                | bi0202  | CRP-GYS  | 202tr3_A   | 3.89%      | 15.81%      | 8.38%       | 4.51%     | 5.41%     | 3.24%     | 2.59%      | 1.92%      | 1.56%      | 1.56%               | 15.81%              | 3.89%                  |
| 65                                | bi0202  | CRP-GYS  | 202tr2_A   | 5.29%      | 5.77%       | 3.34%       | 4.40%     | 2.47%     | 2.45%     | 1.50%      | 1.05%      | 2.18%      | 1.05%               | 5.77%               | 2.47%                  |
| 73                                | bi0202  | CRP-GYS  | 202tr3_A   | 16.06%     | 10.35%      | 10.23%      | 8.78%     | 23.34%    | 8.65%     | 14.73%     | 5.49%      | 4.57%      | 4.57%               | 23.34%              | 10.23%                 |
| 86                                | bi0202  | CRP-GYS  | 202tr3_A   | 6.24%      | 3.68%       | 1.58%       | 2.34%     | 2.22%     | 1.52%     | 1.57%      | 0.61%      | 1.83%      | 0.61%               | 6.24%               | 1.83%                  |
| 95                                | bi0202  | CRP-GYS  | 202tr3_A   | 12.53%     | 3.81%       | 4.91%       | 3.51%     | 3.46%     | 1.90%     | 2.30%      | 2.29%      | 1.07%      | 1.07%               | 12.53%              | 3.46%                  |
| Min Inter-lab CV                  |         |          |            | 2.54%      | 3.68%       | 1.58%       | 1.44%     | 0.96%     | 1.43%     | 1.06%      | 0.61%      | 0.70%      |                     |                     |                        |
| Max Inter-lab CV                  |         |          |            | 16.06%     | 15.81%      | 10.23%      | 8.78%     | 23.34%    | 8.65%     | 14.73%     | 7.24%      | 7.26%      |                     |                     |                        |
| Median Inter-lab CV               |         |          |            | 6.97%      | 5.41%       | 6.16%       | 3.96%     | 4.37%     | 2.84%     | 2.45%      | 2.10%      | 2.00%      |                     |                     |                        |
| 19                                | bi0231  | CRP-ESD  | 231tr2_A   | 5.85%      | 6.22%       | 3.82%       | 7.10%     | 3.42%     | 2.47%     | 3.51%      | 12.52%     | 8.43%      | 2.47%               | 12.52%              | 5.85%                  |
| 52                                | bi0231  | CRP-ESD  | 231tr3_A   | 4.60%      | 5.00%       | 11.76%      | 5.45%     | 2.21%     | 7.14%     | 5.27%      | 2.79%      | 4.05%      | 2.21%               | 11.76%              | 5.00%                  |
| 54                                | bi0231  | CRP-ESD  | 231tr1_A   | 11.12%     | 5.66%       | 2.79%       | 7.84%     | 2.49%     | 1.87%     | 2.56%      | 1.78%      | 2.97%      | 1.78%               | 11.12%              | 2.79%                  |
| 56                                | bi0231  | CRP-ESD  | 231tr3_A   | 15.34%     | 9.39%       | 13.67%      | 10.42%    | 5.56%     | 10.82%    | 8.33%      | 8.63%      | 12.92%     | 5.56%               | 15.34%              | 10.42%                 |
| 65                                | bi0231  | CRP-ESD  | 231tr2_A   | 2.24%      | 5.07%       | 1.74%       | 3.33%     | 5.56%     | 1.92%     | 2.72%      | 0.29%      | 1.01%      | 0.29%               | 5.56%               | 2.24%                  |
| 73                                | bi0231  | CRP-ESD  | 231tr2_A   | 13.66%     | 13.07%      | 2.23%       | 3.63%     | 3.47%     | 4.43%     | 6.01%      | 3.73%      | 5.21%      | 2.23%               | 13.66%              | 4.43%                  |
| 86                                | bi0231  | CRP-ESD  | 231tr1_A   | 4.66%      | 5.14%       | 0.76%       | 2.75%     | 2.61%     | 1.22%     | 1.85%      | 5.06%      | 4.12%      | 0.76%               | 5.14%               | 2.75%                  |
| 95                                | bi0231  | CRP-ESD  | 231tr1_A   | 7.35%      | 7.50%       | 6.76%       | 5.60%     | 3.55%     | 4.79%     | 1.42%      | 3.06%      | 4.67%      | 1.42%               | 7.50%               | 4.79%                  |
| Min Inter-lab CV                  |         |          |            | 2.24%      | 5.00%       | 0.76%       | 2.75%     | 2.21%     | 1.22%     | 1.42%      | 0.29%      | 1.01%      |                     |                     |                        |
| Max Inter-lab CV                  |         |          |            | 15.34%     | 13.07%      | 13.67%      | 10.42%    | 5.56%     | 10.82%    | 8.33%      | 12.52%     | 12.92%     |                     |                     |                        |
| Median Inter-lab CV               |         |          |            | 6.60%      | 5.94%       | 3.30%       | 5.52%     | 3.45%     | 3.45%     | 3.12%      | 3.40%      | 4.39%      |                     |                     |                        |

**Supplementary Table 2B:** Summary of inter-lab and intra-lab CVs for all peptides calculated across the concentration range of spiked analyte - Study II.

(color code: CV's : 0-10%, CV's : 10-20%, CV's : 20-30%, and CV's ≥ 30%)

|                     |         |          |            | Coefficient of variation, Study II |          |          |        |        |        |         |         |         |                  |                  |                     |  |  |  |
|---------------------|---------|----------|------------|------------------------------------|----------|----------|--------|--------|--------|---------|---------|---------|------------------|------------------|---------------------|--|--|--|
| site                | peptide | pro-pept | transition | B (1.0)                            | C (2.92) | D (8.55) | E (25) | F (46) | G (83) | H (151) | I (275) | J (500) | Min Intra-lab CV | Max Intra-lab CV | Median Intra-lab CV |  |  |  |
| 19                  | bi0037  | PSA-LSE  | 37tr3_A    | 13.38%                             | 9.72%    | 4.81%    | 3.99%  | 2.34%  | 6.60%  | 2.45%   | 1.17%   | 4.58%   | 1.17%            | 13.38%           | 4.58%               |  |  |  |
| 52                  | bi0037  | PSA-LSE  | 37tr3_A    | 4.83%                              | 4.61%    | 1.85%    | 2.07%  | 1.44%  | 2.01%  | 1.82%   | 1.00%   | 1.00%   | 1.00%            | 4.83%            | 2.01%               |  |  |  |
| 54                  | bi0037  | PSA-LSE  | 37tr3_A    | 20.66%                             | 11.49%   | 3.16%    | 5.85%  | 3.14%  | 2.98%  | 5.70%   | 1.28%   | 3.48%   | 1.28%            | 20.66%           | 3.48%               |  |  |  |
| 56                  | bi0037  | PSA-LSE  | 37tr3_A    | 3.49%                              | 2.14%    | 1.99%    | 2.04%  | 0.67%  | 2.17%  | 1.29%   | 5.18%   | 14.52%  | 0.67%            | 14.52%           | 2.14%               |  |  |  |
| 65                  | bi0037  | PSA-LSE  | 37tr2_A    | 20.98%                             | 9.90%    | 12.21%   | 9.58%  | 6.96%  | 7.81%  | 5.12%   | 4.44%   | 1.89%   | 1.89%            | 20.98%           | 7.81%               |  |  |  |
| 73                  | bi0037  | PSA-LSE  | 37tr3_A    | 5.29%                              | 4.62%    | 7.80%    | 4.48%  | 5.35%  | 5.38%  | 1.44%   | 1.37%   | 1.59%   | 1.37%            | 7.80%            | 4.62%               |  |  |  |
| 86                  | bi0037  | PSA-LSE  | 37tr3_A    | 3.44%                              | 4.00%    | 2.76%    | 4.37%  | 4.96%  | 1.12%  | 3.74%   | 4.30%   | 0.59%   | 0.59%            | 4.96%            | 3.74%               |  |  |  |
| 95                  | bi0037  | PSA-LSE  | 37tr3_A    | 3.65%                              | 6.05%    | 5.21%    | 3.16%  | 3.79%  | 1.17%  | 2.25%   | 2.42%   | 2.96%   | 1.17%            | 6.05%            | 3.16%               |  |  |  |
| Min Inter-lab CV    |         |          |            | 3.44%                              | 2.14%    | 1.85%    | 2.04%  | 0.67%  | 1.12%  | 1.29%   | 1.17%   | 0.59%   |                  |                  |                     |  |  |  |
| Max Inter-lab CV    |         |          |            | 20.66%                             | 11.49%   | 12.21%   | 9.58%  | 6.96%  | 7.81%  | 5.70%   | 5.18%   | 14.52%  |                  |                  |                     |  |  |  |
| Median Inter-lab CV |         |          |            | 5.06%                              | 5.33%    | 3.98%    | 4.18%  | 3.46%  | 2.57%  | 2.38%   | 2.12%   | 2.42%   |                  |                  |                     |  |  |  |
| 19                  | bi0161  | PSA-IVG  | 161tr2_A   | 13.34%                             | 3.94%    | 8.53%    | 3.91%  | 5.18%  | 5.91%  | 2.29%   | 5.56%   | 2.64%   | 2.29%            | 13.34%           | 5.18%               |  |  |  |
| 52                  | bi0161  | PSA-IVG  | 161tr2_A   | 5.60%                              | 5.52%    | 1.73%    | 5.30%  | 3.13%  | 1.52%  | 2.08%   | 1.38%   | 1.87%   | 1.38%            | 5.60%            | 2.08%               |  |  |  |
| 54                  | bi0161  | PSA-IVG  | 161tr1_A   | 36.67%                             | 45.48%   | 29.69%   | 11.18% | 6.81%  | 3.54%  | 11.15%  | 17.33%  | 4.92%   | 3.54%            | 45.48%           | 11.18%              |  |  |  |
| 56                  | bi0161  | PSA-IVG  | 161tr2_A   | 3.78%                              | 5.52%    | 2.44%    | 3.01%  | 0.70%  | 2.87%  | 4.12%   | 17.24%  | 2.52%   | 0.70%            | 17.24%           | 3.01%               |  |  |  |
| 65                  | bi0161  | PSA-IVG  | 161tr1_A   | 46.83%                             | 46.44%   | 10.04%   | 17.55% | 18.46% | 6.31%  | 10.39%  | 4.73%   | 3.94%   | 3.94%            | 46.83%           | 10.39%              |  |  |  |
| 73                  | bi0161  | PSA-IVG  | 161tr2_A   | 5.68%                              | 2.49%    | 1.22%    | 4.11%  | 5.87%  | 5.46%  | 2.60%   | 3.71%   | 1.80%   | 1.22%            | 5.87%            | 3.71%               |  |  |  |
| 86                  | bi0161  | PSA-IVG  | 161tr2_A   | 14.93%                             | 8.24%    | 10.80%   | 10.35% | 6.97%  | 2.78%  | 8.84%   | 8.32%   | 4.99%   | 2.78%            | 14.93%           | 8.32%               |  |  |  |
| 95                  | bi0161  | PSA-IVG  | 161tr2_A   | 7.97%                              | 4.95%    | 1.45%    | 0.88%  | 4.23%  | 4.39%  | 1.08%   | 0.39%   | 1.98%   | 0.39%            | 7.97%            | 1.98%               |  |  |  |
| Min Inter-lab CV    |         |          |            | 3.78%                              | 2.49%    | 1.22%    | 0.88%  | 0.70%  | 1.52%  | 1.08%   | 0.39%   | 1.80%   |                  |                  |                     |  |  |  |
| Max Inter-lab CV    |         |          |            | 46.83%                             | 46.44%   | 29.69%   | 17.55% | 18.46% | 6.31%  | 11.15%  | 17.33%  | 4.99%   |                  |                  |                     |  |  |  |
| Median Inter-lab CV |         |          |            | 10.65%                             | 5.52%    | 5.48%    | 4.70%  | 5.53%  | 3.96%  | 3.36%   | 5.15%   | 2.58%   |                  |                  |                     |  |  |  |
| 19                  | bi0166  | HRP-SSD  | 166tr2_A   | 26.72%                             | 19.19%   | 15.56%   | 3.28%  | 4.30%  | 3.24%  | 11.51%  | 2.30%   | 7.25%   | 2.30%            | 26.72%           | 7.25%               |  |  |  |
| 52                  | bi0166  | HRP-SSD  | 166tr3_A   | 48.17%                             | 6.05%    | 12.21%   | 7.66%  | 5.03%  | 6.91%  | 3.43%   | 3.70%   | 5.61%   | 3.43%            | 48.17%           | 6.05%               |  |  |  |
| 54                  | bi0166  | HRP-SSD  | 166tr3_A   | 20.05%                             | 7.53%    | 8.33%    | 8.25%  | 3.73%  | 3.41%  | 7.30%   | 0.41%   | 2.58%   | 0.41%            | 20.05%           | 7.30%               |  |  |  |
| 56                  | bi0166  | HRP-SSD  | 166tr2_A   | 5.37%                              | 3.10%    | 7.79%    | 5.48%  | 2.20%  | 1.02%  | 10.65%  | 17.02%  | 5.52%   | 1.02%            | 17.02%           | 5.48%               |  |  |  |
| 65                  | bi0166  | HRP-SSD  | 166tr3_A   | 17.98%                             | 4.57%    | 11.10%   | 5.21%  | 18.48% | 7.01%  | 2.87%   | 1.21%   | 2.90%   | 1.21%            | 18.48%           | 5.21%               |  |  |  |
| 73                  | bi0166  | HRP-SSD  | 166tr2_A   | 20.75%                             | 2.25%    | 3.81%    | 2.10%  | 13.98% | 1.81%  | 8.27%   | 4.92%   | 6.29%   | 1.81%            | 20.75%           | 4.92%               |  |  |  |
| 86                  | bi0166  | HRP-SSD  | 166tr3_A   | 16.36%                             | 4.68%    | 5.53%    | 7.01%  | 2.10%  | 10.20% | 1.65%   | 1.19%   | 2.85%   | 1.19%            | 16.36%           | 4.68%               |  |  |  |
| 95                  | bi0166  | HRP-SSD  | 166tr3_A   | 21.78%                             | 5.54%    | 4.96%    | 4.39%  | 10.51% | 2.60%  | 3.45%   | 2.21%   | 4.65%   | 2.21%            | 21.78%           | 4.65%               |  |  |  |
| Min Inter-lab CV    |         |          |            | 5.37%                              | 2.25%    | 3.81%    | 2.10%  | 2.10%  | 1.02%  | 1.65%   | 0.41%   | 2.58%   |                  |                  |                     |  |  |  |
| Max Inter-lab CV    |         |          |            | 48.17%                             | 19.19%   | 15.56%   | 8.25%  | 18.48% | 10.20% | 11.51%  | 17.02%  | 7.25%   |                  |                  |                     |  |  |  |
| Median Inter-lab CV |         |          |            | 13.36%                             | 5.52%    | 5.35%    | 4.43%  | 4.63%  | 3.33%  | 3.39%   | 3.06%   | 2.88%   |                  |                  |                     |  |  |  |
| 19                  | bi0167  | LEP-IND  | 167tr2_A   | 26.16%                             | 36.87%   | 12.58%   | 8.17%  | 17.89% | 25.64% | 2.85%   | 1.96%   | 4.08%   | 1.96%            | 36.87%           | 12.58%              |  |  |  |
| 52                  | bi0167  | LEP-IND  |            |                                    |          |          |        |        |        |         |         |         |                  |                  |                     |  |  |  |
| 54                  | bi0167  | LEP-IND  | 167tr2_A   | 4.23%                              | 16.28%   | 8.44%    | 2.58%  | 2.07%  | 1.22%  | 0.67%   | 1.51%   | 3.60%   | 0.67%            | 16.28%           | 2.58%               |  |  |  |
| 56                  | bi0167  | LEP-IND  | 167tr1_A   | 10.14%                             |          | 24.26%   | 21.28% | 1.36%  | 8.65%  | 26.19%  | 22.00%  | 21.14%  | 1.36%            | 26.19%           | 21.21%              |  |  |  |
| 65                  | bi0167  | LEP-IND  | 167tr1_A   | 47.78%                             | 29.54%   | 18.52%   | 4.60%  | 17.77% | 15.26% | 5.66%   | 0.91%   | 6.13%   | 0.91%            | 47.78%           | 15.26%              |  |  |  |
| 73                  | bi0167  | LEP-IND  | 167tr1_A   | 25.33%                             | 99.94%   | 14.48%   | 21.96% | 15.16% | 7.37%  | 4.58%   | 7.38%   | 4.41%   | 4.41%            | 99.94%           | 14.48%              |  |  |  |
| 86                  | bi0167  | LEP-IND  | 167tr1_A   | 47.93%                             | 34.37%   | 100.09%  | 69.80% | 21.44% | 34.71% | 77.94%  | 84.70%  | 102.31% | 21.44%           | 102.31%          | 69.80%              |  |  |  |
| 95                  | bi0167  | LEP-IND  | 167tr2_A   | 6.07%                              | 23.53%   | 9.70%    | 7.64%  | 2.62%  | 4.74%  | 1.86%   | 4.24%   | 2.95%   | 1.86%            | 23.53%           | 4.74%               |  |  |  |
| Min Inter-lab CV    |         |          |            | 4.23%                              | 16.28%   | 8.44%    | 2.58%  | 1.36%  | 1.22%  | 0.67%   | 0.91%   | 2.95%   |                  |                  |                     |  |  |  |
| Max Inter-lab CV    |         |          |            | 47.93%                             | 99.94%   | 100.09%  | 69.80% | 21.44% | 34.71% | 77.94%  | 84.70%  | 102.31% |                  |                  |                     |  |  |  |
| Median Inter-lab CV |         |          |            | 25.33%                             | 31.96%   | 14.48%   | 8.17%  | 15.16% | 8.65%  | 4.58%   | 4.24%   | 4.41%   |                  |                  |                     |  |  |  |

|                     |         |          |            | Coefficient of variation, Study II |             |             |           |           |           |            |            |            |                     |                     |                        |  |  |
|---------------------|---------|----------|------------|------------------------------------|-------------|-------------|-----------|-----------|-----------|------------|------------|------------|---------------------|---------------------|------------------------|--|--|
| site                | peptide | pro-pept | transition | B<br>(1.0)                         | C<br>(2.92) | D<br>(8.55) | E<br>(25) | F<br>(46) | G<br>(83) | H<br>(151) | I<br>(275) | J<br>(500) | Min<br>Intra-lab CV | Max<br>Intra-lab CV | Median<br>Intra-lab CV |  |  |
| 19                  | bi0169  | MBP-HGF  | 169tr3_A   | 16.60%                             | 9.96%       | 7.14%       | 6.61%     | 6.91%     | 8.08%     | 3.73%      | 3.47%      | 6.43%      | 3.47%               | 16.60%              | 6.91%                  |  |  |
| 52                  | bi0169  | MBP-HGF  | 169tr3_A   | 7.76%                              | 4.00%       | 4.14%       | 1.60%     | 1.22%     | 0.82%     | 1.49%      | 0.79%      | 0.82%      | 0.79%               | 7.76%               | 1.49%                  |  |  |
| 54                  | bi0169  | MBP-HGF  | 169tr3_A   | 15.54%                             | 10.49%      | 3.83%       | 4.64%     | 5.70%     | 3.31%     | 4.86%      | 3.28%      | 4.82%      | 3.28%               | 15.54%              | 4.82%                  |  |  |
| 56                  | bi0169  | MBP-HGF  | 169tr3_A   | 4.12%                              | 44.93%      | 7.20%       | 4.53%     | 3.59%     | 3.77%     | 9.94%      | 23.48%     | 11.65%     | 3.59%               | 44.93%              | 7.20%                  |  |  |
| 65                  | bi0169  | MBP-HGF  | 169tr3_A   | 1.38%                              | 3.13%       | 5.45%       | 4.47%     | 2.76%     | 3.60%     | 2.27%      | 3.57%      | 1.54%      | 1.38%               | 5.45%               | 3.13%                  |  |  |
| 73                  | bi0169  | MBP-HGF  | 169tr3_A   | 7.03%                              | 8.63%       | 20.87%      | 7.78%     | 9.50%     | 6.63%     | 3.72%      | 5.94%      | 8.12%      | 3.72%               | 20.87%              | 7.78%                  |  |  |
| 86                  | bi0169  | MBP-HGF  | 169tr3_A   | 33.51%                             | 29.00%      | 52.51%      | 7.09%     | 1.11%     | 66.73%    | 58.41%     | 96.53%     | 47.45%     | 1.11%               | 96.53%              | 47.45%                 |  |  |
| 95                  | bi0169  | MBP-HGF  | 169tr3_A   | 2.92%                              | 2.45%       | 2.11%       | 2.00%     | 0.77%     | 2.44%     | 1.90%      | 2.12%      | 2.15%      | 0.77%               | 2.92%               | 2.12%                  |  |  |
| Min Inter-lab CV    |         |          |            | 1.38%                              | 2.45%       | 2.11%       | 1.60%     | 0.77%     | 0.82%     | 1.49%      | 0.79%      | 0.82%      |                     |                     |                        |  |  |
| Max Inter-lab CV    |         |          |            | 33.51%                             | 44.93%      | 52.51%      | 7.78%     | 9.50%     | 66.73%    | 58.41%     | 96.53%     | 47.45%     |                     |                     |                        |  |  |
| Median Inter-lab CV |         |          |            | 7.39%                              | 9.30%       | 6.29%       | 4.59%     | 3.17%     | 3.68%     | 3.72%      | 3.52%      | 5.62%      |                     |                     |                        |  |  |
| 19                  | bi0170  | MBP-YLA  | 170tr2_A   | 11.96%                             | 4.09%       | 4.80%       | 5.21%     | 17.44%    | 17.73%    | 3.83%      | 5.43%      | 2.78%      | 2.78%               | 17.73%              | 5.21%                  |  |  |
| 52                  | bi0170  | MBP-YLA  | 170tr2_A   | 3.82%                              | 1.41%       | 3.56%       | 1.06%     | 1.51%     | 2.14%     | 1.22%      | 2.43%      | 0.69%      | 0.69%               | 3.82%               | 1.51%                  |  |  |
| 54                  | bi0170  | MBP-YLA  | 170tr2_A   | 3.94%                              | 3.92%       | 3.48%       | 6.76%     | 5.95%     | 5.52%     | 2.28%      | 7.24%      | 15.08%     | 2.28%               | 15.08%              | 5.52%                  |  |  |
| 56                  | bi0170  | MBP-YLA  | 170tr2_A   | 17.32%                             | 4.06%       | 3.45%       | 4.61%     | 2.88%     | 4.11%     | 35.99%     | 11.50%     | 3.58%      | 2.88%               | 35.99%              | 4.11%                  |  |  |
| 65                  | bi0170  | MBP-YLA  | 170tr3_A   | 19.83%                             | 17.27%      | 6.17%       | 8.23%     | 12.98%    | 5.67%     | 8.03%      | 7.57%      | 6.21%      | 5.67%               | 19.83%              | 8.03%                  |  |  |
| 73                  | bi0170  | MBP-YLA  | 170tr2_A   | 33.13%                             | 15.46%      | 14.63%      | 14.11%    | 10.28%    | 11.74%    | 6.50%      | 2.49%      | 16.42%     | 2.49%               | 33.13%              | 14.11%                 |  |  |
| 86                  | bi0170  | MBP-YLA  | 170tr2_A   | 9.85%                              | 23.53%      | 22.66%      | 37.88%    | 6.49%     | 64.39%    | 26.85%     | 34.55%     | 42.19%     | 6.49%               | 64.39%              | 26.85%                 |  |  |
| 95                  | bi0170  | MBP-YLA  | 170tr2_A   | 5.95%                              | 3.56%       | 4.11%       | 2.15%     | 1.26%     | 2.47%     | 0.73%      | 1.65%      | 1.69%      | 0.73%               | 5.95%               | 2.15%                  |  |  |
| Min Inter-lab CV    |         |          |            | 3.82%                              | 1.41%       | 3.45%       | 1.06%     | 1.26%     | 2.14%     | 0.73%      | 1.65%      | 0.69%      |                     |                     |                        |  |  |
| Max Inter-lab CV    |         |          |            | 33.13%                             | 23.53%      | 22.66%      | 37.88%    | 17.44%    | 64.39%    | 35.99%     | 34.55%     | 42.19%     |                     |                     |                        |  |  |
| Median Inter-lab CV |         |          |            | 10.90%                             | 4.07%       | 4.45%       | 5.98%     | 6.22%     | 5.60%     | 5.16%      | 6.33%      | 4.89%      |                     |                     |                        |  |  |
| 19                  | bi0171  | MYO-LFT  | 171tr1_A   | 6.34%                              | 12.83%      | 7.67%       | 7.42%     | 13.05%    | 3.65%     | 1.50%      | 2.72%      | 1.79%      | 1.50%               | 13.05%              | 6.34%                  |  |  |
| 52                  | bi0171  | MYO-LFT  | 171tr1_A   | 9.42%                              | 4.13%       | 4.09%       | 1.18%     | 0.49%     | 2.19%     | 1.34%      | 2.00%      | 1.86%      | 0.49%               | 9.42%               | 2.00%                  |  |  |
| 54                  | bi0171  | MYO-LFT  | 171tr2_A   | 12.32%                             | 1.88%       | 2.98%       | 2.73%     | 3.85%     | 4.24%     | 3.89%      | 7.61%      | 7.53%      | 1.88%               | 12.32%              | 3.89%                  |  |  |
| 56                  | bi0171  | MYO-LFT  | 171tr1_A   | 6.26%                              | 7.84%       | 2.57%       | 2.47%     | 3.81%     | 7.65%     | 4.83%      | 7.15%      | 84.80%     | 2.47%               | 84.80%              | 6.26%                  |  |  |
| 65                  | bi0171  | MYO-LFT  | 171tr3_A   | 7.31%                              | 3.09%       | 3.91%       | 4.19%     | 2.85%     | 2.09%     | 2.58%      | 3.85%      | 1.69%      | 1.69%               | 7.31%               | 3.09%                  |  |  |
| 73                  | bi0171  | MYO-LFT  | 171tr1_A   | 8.13%                              | 3.11%       | 6.66%       | 2.71%     | 6.04%     | 2.34%     | 3.51%      | 2.90%      | 1.66%      | 1.66%               | 8.13%               | 3.11%                  |  |  |
| 86                  | bi0171  | MYO-LFT  | 171tr1_A   | 36.20%                             | 43.14%      | 45.40%      | 29.52%    | 10.16%    | 35.25%    | 16.99%     | 37.20%     | 40.40%     | 10.16%              | 45.40%              | 36.20%                 |  |  |
| 95                  | bi0171  | MYO-LFT  | 171tr1_A   | 4.86%                              | 3.51%       | 6.16%       | 2.08%     | 4.21%     | 3.29%     | 1.17%      | 0.22%      | 2.51%      | 0.22%               | 6.16%               | 3.29%                  |  |  |
| Min Inter-lab CV    |         |          |            | 4.86%                              | 1.88%       | 2.57%       | 1.18%     | 0.49%     | 2.09%     | 1.17%      | 0.22%      | 1.66%      |                     |                     |                        |  |  |
| Max Inter-lab CV    |         |          |            | 36.20%                             | 43.14%      | 45.40%      | 29.52%    | 13.05%    | 35.25%    | 16.99%     | 37.20%     | 84.80%     |                     |                     |                        |  |  |
| Median Inter-lab CV |         |          |            | 7.72%                              | 3.82%       | 5.13%       | 2.72%     | 4.03%     | 3.47%     | 3.05%      | 3.37%      | 2.19%      |                     |                     |                        |  |  |
| 19                  | bi0173  | APR-AGL  | 173tr2_A   | 24.98%                             | 12.57%      | 7.76%       | 1.57%     | 10.81%    | 5.99%     | 7.86%      | 6.60%      | 7.36%      | 1.57%               | 24.98%              | 7.76%                  |  |  |
| 52                  | bi0173  | APR-AGL  | 173tr3_A   | 12.60%                             | 18.18%      | 4.50%       | 3.95%     | 4.86%     | 8.66%     | 4.47%      | 3.72%      | 2.42%      | 2.42%               | 18.18%              | 4.50%                  |  |  |
| 54                  | bi0173  | APR-AGL  | 173tr2_A   | 18.18%                             | 29.65%      | 15.82%      | 15.44%    | 2.84%     | 2.13%     | 7.12%      | 7.59%      | 4.59%      | 2.13%               | 29.65%              | 7.59%                  |  |  |
| 56                  | bi0173  | APR-AGL  | 173tr2_A   | 5.50%                              | 3.80%       | 8.27%       | 1.51%     | 1.14%     | 2.00%     | 1.93%      | 6.46%      | 0.69%      | 0.69%               | 8.27%               | 2.00%                  |  |  |
| 65                  | bi0173  | APR-AGL  | 173tr3_A   | 13.15%                             | 13.58%      | 13.98%      | 8.75%     | 3.22%     | 3.33%     | 4.60%      | 4.05%      | 3.12%      | 3.12%               | 13.98%              | 4.60%                  |  |  |
| 73                  | bi0173  | APR-AGL  | 173tr3_A   | 16.51%                             | 19.49%      | 3.72%       | 5.27%     | 12.58%    | 6.84%     | 2.73%      | 8.95%      | 5.10%      | 2.73%               | 19.49%              | 6.84%                  |  |  |
| 86                  | bi0173  | APR-AGL  | 173tr2_A   | 7.76%                              | 10.11%      | 4.38%       | 4.84%     | 3.34%     | 2.67%     | 3.43%      | 3.11%      | 4.07%      | 2.67%               | 10.11%              | 4.07%                  |  |  |
| 95                  | bi0173  | APR-AGL  | 173tr2_A   | 18.27%                             | 8.15%       | 10.84%      | 3.83%     | 3.28%     | 6.36%     | 3.42%      | 7.55%      | 5.88%      | 3.28%               | 18.27%              | 6.36%                  |  |  |
| Min Inter-lab CV    |         |          |            | 5.50%                              | 3.80%       | 3.72%       | 1.51%     | 1.14%     | 2.00%     | 1.93%      | 3.11%      | 0.69%      |                     |                     |                        |  |  |
| Max Inter-lab CV    |         |          |            | 24.98%                             | 29.65%      | 15.82%      | 15.44%    | 12.58%    | 8.66%     | 7.86%      | 8.95%      | 7.36%      |                     |                     |                        |  |  |
| Median Inter-lab CV |         |          |            | 14.83%                             | 13.08%      | 8.01%       | 4.39%     | 3.31%     | 4.66%     | 3.95%      | 6.53%      | 4.33%      |                     |                     |                        |  |  |



|                     |         |          |            | Coefficient of variation, Study II |             |             |           |           |           |            |            |            |                     |                     |                        |
|---------------------|---------|----------|------------|------------------------------------|-------------|-------------|-----------|-----------|-----------|------------|------------|------------|---------------------|---------------------|------------------------|
| site                | peptide | pro-pept | transition | B<br>(1.0)                         | C<br>(2.92) | D<br>(8.55) | E<br>(25) | F<br>(46) | G<br>(83) | H<br>(151) | I<br>(275) | J<br>(500) | Min<br>Intra-lab CV | Max<br>Intra-lab CV | Median<br>Intra-lab CV |
| 19                  | bi0202  | CRP-GYS  | 202tr3_A   | 27.25%                             | 18.65%      | 11.26%      | 5.84%     | 3.16%     | 3.96%     | 5.22%      | 6.08%      | 7.46%      | 3.16%               | 27.25%              | 6.08%                  |
| 52                  | bi0202  | CRP-GYS  | 202tr3_A   | 6.12%                              | 4.26%       | 2.31%       | 2.06%     | 1.94%     | 1.81%     | 0.54%      | 1.16%      | 2.56%      | 0.54%               | 6.12%               | 2.06%                  |
| 54                  | bi0202  | CRP-GYS  | 202tr3_A   | 17.40%                             | 15.08%      | 3.45%       | 8.13%     | 6.38%     | 7.52%     | 3.95%      | 5.79%      | 3.25%      | 3.25%               | 17.40%              | 6.38%                  |
| 56                  | bi0202  | CRP-GYS  | 202tr3_A   | 5.18%                              | 5.83%       | 5.31%       | 3.31%     | 0.70%     | 0.89%     | 0.51%      | 6.66%      | 5.21%      | 0.51%               | 6.66%               | 5.18%                  |
| 65                  | bi0202  | CRP-GYS  | 202tr2_A   | 13.99%                             | 5.58%       | 7.72%       | 2.45%     | 4.69%     | 3.20%     | 1.41%      | 3.53%      | 2.47%      | 1.41%               | 13.99%              | 3.53%                  |
| 73                  | bi0202  | CRP-GYS  | 202tr3_A   | 9.44%                              | 4.44%       | 8.57%       | 3.69%     | 9.37%     | 1.18%     | 4.86%      | 4.72%      | 5.22%      | 1.18%               | 9.44%               | 4.86%                  |
| 86                  | bi0202  | CRP-GYS  | 202tr3_A   | 4.92%                              | 4.76%       | 0.97%       | 1.36%     | 0.78%     | 0.89%     | 1.23%      | 1.10%      | 2.43%      | 0.78%               | 4.92%               | 1.23%                  |
| 95                  | bi0202  | CRP-GYS  | 202tr3_A   | 6.15%                              | 5.53%       | 1.89%       | 2.77%     | 5.05%     | 2.73%     | 2.45%      | 3.43%      | 2.80%      | 1.89%               | 6.15%               | 2.80%                  |
| Min Inter-lab CV    |         |          |            | 4.92%                              | 4.26%       | 0.97%       | 1.36%     | 0.70%     | 0.89%     | 0.51%      | 1.10%      | 2.43%      |                     |                     |                        |
| Max Inter-lab CV    |         |          |            | 27.25%                             | 18.65%      | 11.26%      | 8.13%     | 9.37%     | 7.52%     | 5.22%      | 6.66%      | 7.46%      |                     |                     |                        |
| Median Inter-lab CV |         |          |            | 7.79%                              | 5.55%       | 4.38%       | 3.04%     | 3.93%     | 2.27%     | 1.93%      | 4.13%      | 3.03%      |                     |                     |                        |
| 19                  | bi0231  | CRP-ESD  | 231tr2_A   | 5.88%                              | 11.81%      | 10.06%      | 9.38%     | 3.67%     | 6.37%     | 2.40%      | 4.43%      | 4.02%      | 2.40%               | 11.81%              | 5.88%                  |
| 52                  | bi0231  | CRP-ESD  | 231tr3_A   | 10.94%                             | 13.60%      | 10.82%      | 5.43%     | 5.77%     | 7.68%     | 1.88%      | 2.71%      | 2.07%      | 1.88%               | 13.60%              | 5.77%                  |
| 54                  | bi0231  | CRP-ESD  | 231tr1_A   | 8.42%                              | 9.12%       | 5.70%       | 2.13%     | 2.92%     | 2.06%     | 3.24%      | 3.06%      | 1.70%      | 1.70%               | 9.12%               | 3.06%                  |
| 56                  | bi0231  | CRP-ESD  | 231tr3_A   | 11.37%                             | 12.81%      | 13.50%      | 8.43%     | 6.46%     | 3.46%     | 4.77%      | 17.99%     | 7.69%      | 3.46%               | 17.99%              | 8.43%                  |
| 65                  | bi0231  | CRP-ESD  | 231tr2_A   | 9.86%                              | 3.23%       | 3.19%       | 3.28%     | 4.18%     | 2.68%     | 3.96%      | 3.68%      | 1.31%      | 1.31%               | 9.86%               | 3.28%                  |
| 73                  | bi0231  | CRP-ESD  | 231tr2_A   | 10.01%                             | 6.58%       | 8.75%       | 7.37%     | 15.72%    | 4.76%     | 4.21%      | 2.30%      | 5.53%      | 2.30%               | 15.72%              | 6.58%                  |
| 86                  | bi0231  | CRP-ESD  | 231tr1_A   | 5.67%                              | 16.15%      | 21.70%      | 2.09%     | 6.40%     | 21.04%    | 7.16%      | 4.95%      | 6.07%      | 2.09%               | 21.70%              | 6.40%                  |
| 95                  | bi0231  | CRP-ESD  | 231tr1_A   | 7.13%                              | 9.01%       | 7.07%       | 6.80%     | 3.74%     | 2.76%     | 198.26%    | 3.45%      | 1.00%      | 1.00%               | 198.26%             | 6.80%                  |
| Min Inter-lab CV    |         |          |            | 5.67%                              | 3.23%       | 3.19%       | 2.09%     | 2.92%     | 2.06%     | 1.88%      | 2.30%      | 1.00%      |                     |                     |                        |
| Max Inter-lab CV    |         |          |            | 11.37%                             | 16.15%      | 21.70%      | 9.38%     | 15.72%    | 21.04%    | 198.26%    | 17.99%     | 7.69%      |                     |                     |                        |
| Median Inter-lab CV |         |          |            | 9.14%                              | 10.46%      | 9.40%       | 6.12%     | 4.98%     | 4.11%     | 4.09%      | 3.57%      | 3.04%      |                     |                     |                        |

**Supplementary Table 2C:** Summary of inter-lab and intra-lab CVs for all peptides calculated across the concentration range of spiked analyte - Study III.  
(color code: CV's : 0-10%, CV's : 10-20%, CV's : 20-30%, and CV's ≥ 30%)

|                     |         |          |            | Coefficient of variation, Study III |          |          |         |        |        |         |         |         |                  |                  |                     |  |  |  |
|---------------------|---------|----------|------------|-------------------------------------|----------|----------|---------|--------|--------|---------|---------|---------|------------------|------------------|---------------------|--|--|--|
| site                | peptide | pro-pept | transition | B (1.0)                             | C (2.92) | D (8.55) | E (25)  | F (46) | G (83) | H (151) | I (275) | J (500) | Min Intra-lab CV | Max Intra-lab CV | Median Intra-lab CV |  |  |  |
| 19                  | bi0037  | PSA-LSE  | 37tr3_A    | 64.98%                              | 42.78%   | 43.82%   | 32.58%  | 23.15% | 16.82% | 27.49%  | 23.14%  | 10.34%  | 10.34%           | 64.98%           | 27.49%              |  |  |  |
| 52                  | bi0037  | PSA-LSE  | 37tr3_A    | 10.27%                              | 6.75%    | 9.04%    | 9.03%   | 8.66%  | 11.89% | 5.54%   | 8.03%   | 9.60%   | 5.54%            | 11.89%           | 9.03%               |  |  |  |
| 54                  | bi0037  | PSA-LSE  | 37tr3_A    | 10.55%                              | 11.87%   | 7.48%    | 7.63%   | 11.44% | 9.96%  | 6.67%   | 8.80%   | 4.45%   | 4.45%            | 11.87%           | 8.80%               |  |  |  |
| 56                  | bi0037  | PSA-LSE  | 37tr3_A    | 8.37%                               | 7.74%    | 8.16%    | 8.24%   | 9.89%  | 5.22%  | 7.00%   | 9.23%   | 3.87%   | 3.87%            | 9.89%            | 8.16%               |  |  |  |
| 65                  | bi0037  | PSA-LSE  | 37tr2_A    | 35.98%                              | 8.73%    | 11.85%   | 12.34%  | 7.95%  | 8.80%  | 25.47%  | 6.23%   | 9.62%   | 6.23%            | 35.98%           | 9.62%               |  |  |  |
| 73                  | bi0037  | PSA-LSE  | 37tr3_A    | 17.66%                              | 17.23%   | 9.85%    | 20.93%  | 21.54% | 6.48%  | 13.74%  | 5.32%   | 7.94%   | 5.32%            | 21.54%           | 13.74%              |  |  |  |
| 86                  | bi0037  | PSA-LSE  | 37tr3_A    | 19.37%                              | 14.97%   | 9.91%    | 6.55%   | 5.00%  | 7.41%  | 13.98%  | 7.64%   | 11.19%  | 5.00%            | 19.37%           | 9.91%               |  |  |  |
| 95                  | bi0037  | PSA-LSE  | 37tr3_A    | 22.84%                              | 7.61%    | 3.62%    | 5.37%   | 7.29%  | 7.97%  | 5.92%   | 10.36%  | 7.61%   | 3.62%            | 22.84%           | 7.61%               |  |  |  |
| Min Inter-lab CV    |         |          |            | 8.37%                               | 6.75%    | 3.62%    | 5.37%   | 5.00%  | 5.22%  | 5.54%   | 5.32%   | 3.87%   |                  |                  |                     |  |  |  |
| Max Inter-lab CV    |         |          |            | 64.98%                              | 42.78%   | 43.82%   | 32.58%  | 23.15% | 16.82% | 27.49%  | 23.14%  | 11.19%  |                  |                  |                     |  |  |  |
| Median Inter-lab CV |         |          |            | 18.52%                              | 10.30%   | 9.44%    | 8.64%   | 9.27%  | 8.38%  | 10.37%  | 8.41%   | 8.77%   |                  |                  |                     |  |  |  |
| 19                  | bi0161  | PSA-IVG  | 161tr2_A   | 58.54%                              | 32.88%   | 15.19%   | 16.22%  | 6.42%  | 14.45% | 7.11%   | 7.65%   | 8.63%   | 6.42%            | 58.54%           | 14.45%              |  |  |  |
| 52                  | bi0161  | PSA-IVG  | 161tr2_A   | 10.53%                              | 8.70%    | 8.62%    | 9.51%   | 10.55% | 14.15% | 7.63%   | 9.88%   | 9.99%   | 7.63%            | 14.15%           | 9.88%               |  |  |  |
| 54                  | bi0161  | PSA-IVG  | 161tr1_A   | 52.46%                              | 57.30%   | 31.50%   | 46.65%  | 40.31% | 31.23% | 30.67%  | 21.34%  | 35.75%  | 21.34%           | 57.30%           | 35.75%              |  |  |  |
| 56                  | bi0161  | PSA-IVG  | 161tr2_A   | 7.67%                               | 18.12%   | 24.95%   | 5.91%   | 10.67% | 12.69% | 7.78%   | 7.92%   | 4.85%   | 4.85%            | 24.95%           | 7.92%               |  |  |  |
| 65                  | bi0161  | PSA-IVG  | 161tr1_A   | 98.60%                              | 59.35%   | 19.24%   | 35.89%  | 17.95% | 12.12% | 54.23%  | 13.22%  | 20.27%  | 12.12%           | 98.60%           | 20.27%              |  |  |  |
| 73                  | bi0161  | PSA-IVG  | 161tr2_A   | 14.06%                              | 16.23%   | 10.65%   | 15.64%  | 23.54% | 4.73%  | 14.40%  | 9.53%   | 9.23%   | 4.73%            | 23.54%           | 14.06%              |  |  |  |
| 86                  | bi0161  | PSA-IVG  | 161tr2_A   | 12.48%                              | 8.34%    | 9.38%    | 9.85%   | 8.98%  | 6.03%  | 10.90%  | 7.17%   | 8.06%   | 6.03%            | 12.48%           | 9.85%               |  |  |  |
| 95                  | bi0161  | PSA-IVG  | 161tr2_A   | 9.86%                               | 10.62%   | 9.27%    | 9.10%   | 13.27% | 10.74% | 13.29%  | 14.92%  | 16.11%  | 9.10%            | 16.11%           | 10.74%              |  |  |  |
| Min Inter-lab CV    |         |          |            | 7.67%                               | 8.34%    | 8.62%    | 5.91%   | 6.42%  | 4.73%  | 7.11%   | 7.17%   | 4.85%   |                  |                  |                     |  |  |  |
| Max Inter-lab CV    |         |          |            | 98.60%                              | 59.35%   | 31.50%   | 46.65%  | 40.31% | 31.23% | 54.23%  | 21.34%  | 35.75%  |                  |                  |                     |  |  |  |
| Median Inter-lab CV |         |          |            | 13.27%                              | 17.18%   | 12.92%   | 12.74%  | 11.97% | 12.41% | 12.09%  | 9.70%   | 9.61%   |                  |                  |                     |  |  |  |
| 19                  | bi0166  | HRP-SSD  | 166tr2_A   | 100.72%                             | 41.92%   | 80.90%   | 53.90%  | 53.51% | 33.58% | 34.32%  | 34.96%  | 30.83%  | 30.83%           | 100.72%          | 41.92%              |  |  |  |
| 52                  | bi0166  | HRP-SSD  | 166tr3_A   | 25.06%                              | 18.27%   | 15.01%   | 13.22%  | 9.39%  | 14.05% | 7.41%   | 8.91%   | 14.64%  | 7.41%            | 25.06%           | 14.05%              |  |  |  |
| 54                  | bi0166  | HRP-SSD  | 166tr3_A   | 36.66%                              | 21.34%   | 10.65%   | 10.35%  | 20.09% | 21.90% | 23.75%  | 5.04%   | 16.65%  | 5.04%            | 36.66%           | 20.09%              |  |  |  |
| 56                  | bi0166  | HRP-SSD  | 166tr2_A   | 14.12%                              | 16.16%   | 13.08%   | 3.17%   | 10.68% | 5.81%  | 8.98%   | 13.37%  | 14.05%  | 3.17%            | 16.16%           | 13.08%              |  |  |  |
| 65                  | bi0166  | HRP-SSD  | 166tr3_A   | 28.33%                              | 13.61%   | 8.64%    | 32.83%  | 7.01%  | 8.89%  | 24.81%  | 4.11%   | 4.64%   | 4.11%            | 32.83%           | 8.89%               |  |  |  |
| 73                  | bi0166  | HRP-SSD  | 166tr2_A   | 50.79%                              | 22.45%   | 18.37%   | 19.40%  | 18.91% | 13.13% | 12.13%  | 11.08%  | 10.24%  | 10.24%           | 50.79%           | 18.37%              |  |  |  |
| 86                  | bi0166  | HRP-SSD  | 166tr3_A   | 45.83%                              | 31.88%   | 18.47%   | 11.58%  | 18.72% | 21.36% | 24.36%  | 32.69%  | 13.75%  | 11.58%           | 45.83%           | 21.36%              |  |  |  |
| 95                  | bi0166  | HRP-SSD  | 166tr3_A   | 51.25%                              | 24.91%   | 11.56%   | 4.85%   | 6.20%  | 6.24%  | 10.07%  | 8.39%   | 8.40%   | 4.85%            | 51.25%           | 8.40%               |  |  |  |
| Min Inter-lab CV    |         |          |            | 14.12%                              | 13.61%   | 8.64%    | 3.17%   | 6.20%  | 5.81%  | 7.41%   | 4.11%   | 4.64%   |                  |                  |                     |  |  |  |
| Max Inter-lab CV    |         |          |            | 100.72%                             | 41.92%   | 80.90%   | 53.90%  | 53.51% | 33.58% | 34.32%  | 34.96%  | 30.83%  |                  |                  |                     |  |  |  |
| Median Inter-lab CV |         |          |            | 41.24%                              | 21.89%   | 14.04%   | 12.40%  | 14.70% | 13.59% | 17.94%  | 10.00%  | 13.90%  |                  |                  |                     |  |  |  |
| 19                  | bi0167  | LEP-IND  | 167tr2_A   | 92.93%                              | 50.41%   | 308.42%  | 28.85%  | 21.96% | 19.32% | 15.20%  | 13.76%  | 17.64%  | 13.76%           | 308.42%          | 21.96%              |  |  |  |
| 52                  | bi0167  | LEP-IND  |            |                                     |          |          |         |        |        |         |         |         |                  |                  |                     |  |  |  |
| 54                  | bi0167  | LEP-IND  | 167tr2_A   | 25.40%                              | 26.27%   | 8.33%    | 18.43%  | 37.72% | 4.60%  | 38.59%  | 23.85%  | 32.54%  | 4.60%            | 38.59%           | 25.40%              |  |  |  |
| 56                  | bi0167  | LEP-IND  | 167tr1_A   | 30.01%                              | 61.88%   | 41.15%   | 223.21% | 44.08% | 54.39% | 60.50%  | 37.40%  | 35.82%  | 30.01%           | 223.21%          | 44.08%              |  |  |  |
| 65                  | bi0167  | LEP-IND  | 167tr1_A   | 81.38%                              | 68.79%   | 54.89%   | 51.52%  | 19.37% | 38.54% | 23.93%  | 345.62% | 64.68%  | 19.37%           | 345.62%          | 54.89%              |  |  |  |
| 73                  | bi0167  | LEP-IND  | 167tr1_A   | 94.30%                              | 67.51%   | 217.10%  | 25.93%  | 12.33% | 18.23% | 16.68%  | 12.14%  | 14.13%  | 12.14%           | 217.10%          | 18.23%              |  |  |  |
| 86                  | bi0167  | LEP-IND  | 167tr1_A   | 24.25%                              | 32.21%   | 16.98%   | 17.83%  | 17.83% | 35.37% | 27.14%  | 24.34%  | 21.92%  | 16.98%           | 35.37%           | 24.25%              |  |  |  |
| 95                  | bi0167  | LEP-IND  | 167tr2_A   | 38.83%                              | 27.10%   | 15.46%   | 7.27%   | 9.26%  | 7.47%  | 11.70%  | 14.81%  | 14.81%  | 7.27%            | 38.83%           | 11.70%              |  |  |  |
| Min Inter-lab CV    |         |          |            | 24.25%                              | 26.27%   | 8.33%    | 7.27%   | 9.26%  | 4.60%  | 10.04%  | 11.70%  | 14.13%  |                  |                  |                     |  |  |  |
| Max Inter-lab CV    |         |          |            | 94.30%                              | 68.79%   | 308.42%  | 223.21% | 44.08% | 54.39% | 60.50%  | 345.62% | 64.68%  |                  |                  |                     |  |  |  |
| Median Inter-lab CV |         |          |            | 38.83%                              | 50.41%   | 41.15%   | 25.93%  | 19.37% | 19.32% | 23.93%  | 23.85%  | 21.92%  |                  |                  |                     |  |  |  |

|                     |         |          |            | Coefficient of variation, Study III |             |             |           |           |           |            |            |            |                     |                     |                        |  |  |  |
|---------------------|---------|----------|------------|-------------------------------------|-------------|-------------|-----------|-----------|-----------|------------|------------|------------|---------------------|---------------------|------------------------|--|--|--|
| site                | peptide | pro-pept | transition | B<br>(1.0)                          | C<br>(2.92) | D<br>(8.55) | E<br>(25) | F<br>(46) | G<br>(83) | H<br>(151) | I<br>(275) | J<br>(500) | Min<br>Intra-lab CV | Max<br>Intra-lab CV | Median<br>Intra-lab CV |  |  |  |
| 19                  | bi0169  | MBP-HGF  | 169tr3_A   | 72.06%                              | 49.88%      | 30.55%      | 23.30%    | 10.72%    | 16.94%    | 9.94%      | 6.93%      | 13.69%     | 6.93%               | 72.06%              | 16.94%                 |  |  |  |
| 52                  | bi0169  | MBP-HGF  | 169tr3_A   | 11.45%                              | 6.70%       | 8.72%       | 8.17%     | 7.42%     | 11.44%    | 7.34%      | 6.06%      | 7.11%      | 6.06%               | 11.45%              | 7.42%                  |  |  |  |
| 54                  | bi0169  | MBP-HGF  | 169tr3_A   | 32.59%                              | 8.46%       | 23.03%      | 21.95%    | 19.03%    | 24.52%    | 23.67%     | 24.26%     | 9.79%      | 8.46%               | 32.59%              | 23.03%                 |  |  |  |
| 56                  | bi0169  | MBP-HGF  | 169tr3_A   | 28.53%                              | 38.03%      | 70.21%      | 32.76%    | 28.81%    | 21.52%    | 30.05%     | 36.77%     | 36.76%     | 21.52%              | 70.21%              | 32.76%                 |  |  |  |
| 65                  | bi0169  | MBP-HGF  | 169tr3_A   | 46.31%                              | 21.37%      | 11.75%      | 11.67%    | 8.48%     | 5.69%     | 20.98%     | 15.76%     | 8.99%      | 5.69%               | 46.31%              | 11.75%                 |  |  |  |
| 73                  | bi0169  | MBP-HGF  | 169tr3_A   | 54.63%                              | 46.76%      | 79.96%      | 20.58%    | 18.99%    | 8.83%     | 17.47%     | 12.09%     | 5.50%      | 5.50%               | 79.96%              | 18.99%                 |  |  |  |
| 86                  | bi0169  | MBP-HGF  | 169tr3_A   | 24.47%                              | 22.27%      | 13.09%      | 12.72%    | 11.60%    | 6.77%     | 26.01%     | 15.02%     | 5.01%      | 5.01%               | 26.01%              | 13.09%                 |  |  |  |
| 95                  | bi0169  | MBP-HGF  | 169tr3_A   | 30.52%                              | 13.62%      | 7.35%       | 5.26%     | 5.74%     | 6.07%     | 7.39%      | 8.83%      | 11.15%     | 5.26%               | 30.52%              | 7.39%                  |  |  |  |
| Min Inter-lab CV    |         |          |            | 11.45%                              | 6.70%       | 7.35%       | 5.26%     | 5.74%     | 5.69%     | 7.34%      | 6.06%      | 5.01%      |                     |                     |                        |  |  |  |
| Max Inter-lab CV    |         |          |            | 72.06%                              | 49.88%      | 79.96%      | 32.76%    | 28.81%    | 24.52%    | 30.05%     | 36.77%     | 36.76%     |                     |                     |                        |  |  |  |
| Median Inter-lab CV |         |          |            | 31.55%                              | 21.82%      | 18.06%      | 16.65%    | 11.16%    | 10.13%    | 19.22%     | 13.55%     | 9.39%      |                     |                     |                        |  |  |  |
| 19                  | bi0170  | MBP-YLA  | 170tr2_A   |                                     |             |             |           |           |           |            |            |            |                     |                     |                        |  |  |  |
| 52                  | bi0170  | MBP-YLA  | 170tr2_A   |                                     |             |             |           |           |           |            |            |            |                     |                     |                        |  |  |  |
| 54                  | bi0170  | MBP-YLA  | 170tr2_A   |                                     |             |             |           |           |           |            |            |            |                     |                     |                        |  |  |  |
| 56                  | bi0170  | MBP-YLA  | 170tr2_A   |                                     |             |             |           |           |           |            |            |            |                     |                     |                        |  |  |  |
| 65                  | bi0170  | MBP-YLA  | 170tr3_A   |                                     |             |             |           |           |           |            |            |            |                     |                     |                        |  |  |  |
| 73                  | bi0170  | MBP-YLA  | 170tr2_A   |                                     |             |             |           |           |           |            |            |            |                     |                     |                        |  |  |  |
| 86                  | bi0170  | MBP-YLA  | 170tr2_A   |                                     |             |             |           |           |           |            |            |            |                     |                     |                        |  |  |  |
| 95                  | bi0170  | MBP-YLA  | 170tr2_A   |                                     |             |             |           |           |           |            |            |            |                     |                     |                        |  |  |  |
| Min Inter-lab CV    |         |          |            |                                     |             |             |           |           |           |            |            |            |                     |                     |                        |  |  |  |
| Max Inter-lab CV    |         |          |            |                                     |             |             |           |           |           |            |            |            |                     |                     |                        |  |  |  |
| Median Inter-lab CV |         |          |            |                                     |             |             |           |           |           |            |            |            |                     |                     |                        |  |  |  |
| 19                  | bi0171  | MYO-LFT  | 171tr1_A   | 55.68%                              | 39.21%      | 15.00%      | 24.76%    | 21.64%    | 22.15%    | 15.14%     | 20.28%     | 17.59%     | 15.00%              | 55.68%              | 21.64%                 |  |  |  |
| 52                  | bi0171  | MYO-LFT  | 171tr1_A   | 11.83%                              | 7.76%       | 5.66%       | 9.33%     | 9.18%     | 14.66%    | 5.53%      | 9.89%      | 8.78%      | 5.53%               | 14.66%              | 9.18%                  |  |  |  |
| 54                  | bi0171  | MYO-LFT  | 171tr2_A   | 24.24%                              | 12.80%      | 6.63%       | 14.15%    | 12.23%    | 15.73%    | 7.71%      | 16.80%     | 10.34%     | 6.63%               | 24.24%              | 12.80%                 |  |  |  |
| 56                  | bi0171  | MYO-LFT  | 171tr1_A   | 15.13%                              | 73.33%      | 24.23%      | 13.57%    | 12.91%    | 19.08%    | 46.40%     | 14.56%     | 13.44%     | 12.91%              | 73.33%              | 15.13%                 |  |  |  |
| 65                  | bi0171  | MYO-LFT  | 171tr3_A   | 23.77%                              | 26.40%      | 30.55%      | 16.20%    | 11.94%    | 28.12%    | 22.90%     | 21.69%     | 23.13%     | 11.94%              | 30.55%              | 23.13%                 |  |  |  |
| 73                  | bi0171  | MYO-LFT  | 171tr1_A   | 23.50%                              | 19.73%      | 28.28%      | 11.92%    | 47.23%    | 13.41%    | 15.91%     | 18.40%     | 36.46%     | 11.92%              | 47.23%              | 19.73%                 |  |  |  |
| 86                  | bi0171  | MYO-LFT  | 171tr1_A   | 16.12%                              | 31.71%      | 6.78%       | 11.47%    | 8.92%     | 18.84%    | 23.81%     | 15.74%     | 14.75%     | 6.78%               | 31.71%              | 15.74%                 |  |  |  |
| 95                  | bi0171  | MYO-LFT  | 171tr1_A   | 26.90%                              | 10.97%      | 8.88%       | 5.82%     | 10.73%    | 7.67%     | 4.89%      | 9.44%      | 8.02%      | 4.89%               | 26.90%              | 8.88%                  |  |  |  |
| Min Inter-lab CV    |         |          |            | 11.83%                              | 7.76%       | 5.66%       | 5.82%     | 8.92%     | 7.67%     | 4.89%      | 9.44%      | 8.02%      |                     |                     |                        |  |  |  |
| Max Inter-lab CV    |         |          |            | 55.68%                              | 73.33%      | 30.55%      | 24.76%    | 47.23%    | 28.12%    | 46.40%     | 21.69%     | 36.46%     |                     |                     |                        |  |  |  |
| Median Inter-lab CV |         |          |            | 23.64%                              | 23.07%      | 11.94%      | 12.74%    | 12.09%    | 17.28%    | 15.52%     | 16.27%     | 14.10%     |                     |                     |                        |  |  |  |
| 19                  | bi0173  | APR-AGL  | 173tr2_A   | 82.36%                              | 57.91%      | 55.52%      | 24.31%    | 45.18%    | 59.77%    | 13.92%     | 19.31%     | 12.18%     | 12.18%              | 82.36%              | 45.18%                 |  |  |  |
| 52                  | bi0173  | APR-AGL  | 173tr3_A   | 13.53%                              | 18.30%      | 8.94%       | 10.41%    | 10.05%    | 11.43%    | 10.91%     | 9.09%      | 30.72%     | 8.94%               | 30.72%              | 10.91%                 |  |  |  |
| 54                  | bi0173  | APR-AGL  | 173tr2_A   | 41.26%                              | 61.22%      | 68.36%      | 73.13%    | 73.66%    | 73.78%    | 73.77%     | 5.00%      | 7.78%      | 5.00%               | 73.78%              | 68.36%                 |  |  |  |
| 56                  | bi0173  | APR-AGL  | 173tr2_A   | 11.93%                              | 7.29%       | 4.25%       | 6.95%     | 6.72%     | 7.83%     | 5.18%      | 11.21%     | 7.46%      | 4.25%               | 11.93%              | 7.29%                  |  |  |  |
| 65                  | bi0173  | APR-AGL  | 173tr3_A   | 29.64%                              | 6.61%       | 9.32%       | 10.60%    | 11.41%    | 12.64%    | 27.01%     | 6.87%      | 7.30%      | 6.61%               | 29.64%              | 10.60%                 |  |  |  |
| 73                  | bi0173  | APR-AGL  | 173tr3_A   | 48.31%                              | 30.48%      | 31.39%      | 21.07%    | 22.51%    | 20.18%    | 12.04%     | 12.12%     | 12.90%     | 12.04%              | 48.31%              | 21.07%                 |  |  |  |
| 86                  | bi0173  | APR-AGL  | 173tr2_A   | 20.02%                              | 8.42%       | 10.99%      | 10.09%    | 13.62%    | 9.96%     | 14.92%     | 15.40%     | 9.25%      | 8.42%               | 20.02%              | 10.99%                 |  |  |  |
| 95                  | bi0173  | APR-AGL  | 173tr2_A   | 11.03%                              | 9.00%       | 7.87%       | 5.64%     | 7.51%     | 8.86%     | 7.17%      | 11.47%     | 9.68%      | 5.64%               | 11.47%              | 8.86%                  |  |  |  |
| Min Inter-lab CV    |         |          |            | 11.03%                              | 6.61%       | 4.25%       | 5.64%     | 6.72%     | 7.83%     | 5.18%      | 5.00%      | 7.30%      |                     |                     |                        |  |  |  |
| Max Inter-lab CV    |         |          |            | 82.36%                              | 61.22%      | 68.36%      | 73.13%    | 73.66%    | 73.78%    | 73.77%     | 19.31%     | 30.72%     |                     |                     |                        |  |  |  |
| Median Inter-lab CV |         |          |            | 24.83%                              | 13.65%      | 10.15%      | 10.51%    | 12.51%    | 12.04%    | 12.98%     | 11.34%     | 9.46%      |                     |                     |                        |  |  |  |

|                     |         |          |            | Coefficient of variation, Study III |             |             |           |           |           |            |            |            |                     |                     |                        |
|---------------------|---------|----------|------------|-------------------------------------|-------------|-------------|-----------|-----------|-----------|------------|------------|------------|---------------------|---------------------|------------------------|
| site                | peptide | pro-pept | transition | B<br>(1.0)                          | C<br>(2.92) | D<br>(8.55) | E<br>(25) | F<br>(46) | G<br>(83) | H<br>(151) | I<br>(275) | J<br>(500) | Min<br>Intra-lab CV | Max<br>Intra-lab CV | Median<br>Intra-lab CV |
| 19                  | bi0202  | CRP-GYS  | 202tr3_A   | 61.48%                              | 76.15%      | 61.95%      | 49.06%    | 34.61%    | 28.11%    | 34.09%     | 34.98%     | 33.45%     | 28.11%              | 76.15%              | 34.98%                 |
| 52                  | bi0202  | CRP-GYS  | 202tr3_A   | 9.36%                               | 4.83%       | 7.48%       | 7.12%     | 7.27%     | 7.29%     | 6.25%      | 6.66%      | 15.98%     | 4.83%               | 15.98%              | 7.27%                  |
| 54                  | bi0202  | CRP-GYS  | 202tr3_A   | 32.06%                              | 32.38%      | 33.37%      | 45.15%    | 36.85%    | 41.96%    | 28.04%     | 10.50%     | 11.84%     | 10.50%              | 45.15%              | 32.38%                 |
| 56                  | bi0202  | CRP-GYS  | 202tr3_A   | 9.22%                               | 10.49%      | 6.60%       | 5.66%     | 11.18%    | 5.80%     | 5.86%      | 10.71%     | 4.24%      | 4.24%               | 11.18%              | 6.60%                  |
| 65                  | bi0202  | CRP-GYS  | 202tr2_A   | 23.31%                              | 16.38%      | 16.91%      | 19.11%    | 18.37%    | 7.67%     | 31.63%     | 8.59%      | 9.46%      | 7.67%               | 31.63%              | 16.91%                 |
| 73                  | bi0202  | CRP-GYS  | 202tr3_A   | 47.63%                              | 36.11%      | 24.30%      | 26.94%    | 35.30%    | 13.14%    | 15.59%     | 12.68%     | 9.44%      | 9.44%               | 47.63%              | 24.30%                 |
| 86                  | bi0202  | CRP-GYS  | 202tr3_A   | 16.71%                              | 20.61%      | 13.01%      | 6.30%     | 8.89%     | 9.49%     | 16.06%     | 5.88%      | 14.40%     | 5.88%               | 20.61%              | 13.01%                 |
| 95                  | bi0202  | CRP-GYS  | 202tr3_A   | 17.21%                              | 11.07%      | 8.38%       | 7.62%     | 13.02%    | 5.35%     | 11.12%     | 11.29%     | 13.65%     | 5.35%               | 17.21%              | 11.12%                 |
| Min Inter-lab CV    |         |          |            | 9.22%                               | 4.83%       | 6.60%       | 5.66%     | 7.27%     | 5.35%     | 5.86%      | 5.88%      | 4.24%      |                     |                     |                        |
| Max Inter-lab CV    |         |          |            | 61.48%                              | 76.15%      | 61.95%      | 49.06%    | 36.85%    | 41.96%    | 34.09%     | 34.98%     | 33.45%     |                     |                     |                        |
| Median Inter-lab CV |         |          |            | 20.26%                              | 18.49%      | 14.96%      | 13.37%    | 15.69%    | 8.58%     | 15.82%     | 10.60%     | 12.75%     |                     |                     |                        |
| 19                  | bi0231  | CRP-ESD  | 231tr2_A   | 33.51%                              | 25.98%      | 28.54%      | 17.13%    | 10.29%    | 28.41%    | 7.18%      | 9.32%      | 13.11%     | 7.18%               | 33.51%              | 17.13%                 |
| 52                  | bi0231  | CRP-ESD  | 231tr3_A   | 12.21%                              | 7.70%       | 7.15%       | 11.03%    | 12.17%    | 10.30%    | 11.04%     | 10.98%     | 11.59%     | 7.15%               | 12.21%              | 11.03%                 |
| 54                  | bi0231  | CRP-ESD  | 231tr1_A   | 9.59%                               | 9.28%       | 4.86%       | 5.63%     | 8.48%     | 8.71%     | 8.54%      | 11.99%     | 7.43%      | 4.86%               | 11.99%              | 8.54%                  |
| 56                  | bi0231  | CRP-ESD  | 231tr3_A   | 10.70%                              | 19.02%      | 12.69%      | 5.36%     | 15.88%    | 20.98%    | 13.28%     | 11.06%     | 13.54%     | 5.36%               | 20.98%              | 13.28%                 |
| 65                  | bi0231  | CRP-ESD  | 231tr2_A   | 14.99%                              | 17.06%      | 6.64%       | 9.35%     | 9.46%     | 6.22%     | 23.62%     | 6.30%      | 10.14%     | 6.22%               | 23.62%              | 9.46%                  |
| 73                  | bi0231  | CRP-ESD  | 231tr2_A   | 31.91%                              | 24.70%      | 29.78%      | 14.43%    | 18.07%    | 12.08%    | 13.03%     | 22.53%     | 9.81%      | 9.81%               | 31.91%              | 18.07%                 |
| 86                  | bi0231  | CRP-ESD  | 231tr1_A   | 6.99%                               | 16.32%      | 5.41%       | 6.79%     | 4.64%     | 11.42%    | 16.53%     | 17.79%     | 9.29%      | 4.64%               | 17.79%              | 9.29%                  |
| 95                  | bi0231  | CRP-ESD  | 231tr1_A   | 10.89%                              | 11.39%      | 8.35%       | 5.83%     | 12.51%    | 8.59%     | 9.66%      | 12.65%     | 12.30%     | 5.83%               | 12.65%              | 10.89%                 |
| Min Inter-lab CV    |         |          |            | 6.99%                               | 7.70%       | 4.86%       | 5.36%     | 4.64%     | 6.22%     | 7.18%      | 6.30%      | 7.43%      |                     |                     |                        |
| Max Inter-lab CV    |         |          |            | 33.51%                              | 25.98%      | 29.78%      | 17.13%    | 18.07%    | 28.41%    | 23.62%     | 22.53%     | 13.54%     |                     |                     |                        |
| Median Inter-lab CV |         |          |            | 11.55%                              | 16.69%      | 7.75%       | 8.07%     | 11.23%    | 10.86%    | 12.04%     | 11.53%     | 10.86%     |                     |                     |                        |

**Supplementary Figure 2:** Intra- and inter-lab variation of assay CV (coefficient of variation) across studies I, II and III, for the entire range (1-500 fmol/ $\mu$ l) of spike in concentrations of the (light) analyte in diluted plasma. Protein concentration in  $\mu$ g/mL on x-axis is  $\mu$ g protein equivalent in 1 mL of neat plasma.

Analyte concentrations are arranged along the x-axis in sample order. At each concentration, three box and whisker plots summarize CV variation for studies I, II and IIIa-c, respectively.

The box plots show inter-lab CV as the median of intra-lab CVs, with the box spanning the interquartile range (IQR), with the whiskers extending to  $1.5 * \text{IQR}$ . Values beyond  $1.5 * \text{IQR}$  are deemed outliers, and marked by o. Within each box plot, the actual intra-lab CV values for the individual sites are shown with color coded markers. The CV values are calculated based on the single best performing transition (lowest combined CV) across studies I and II. This same transition is also used for study III, in addition to determining LOD and LOQ.

In the plots, the y-axes ranges are different for different peptides to effectively visualize the CV variation for that particular peptide, with some peptides having relatively small inter- and intra-lab variations in comparison.

The placement of color coded site markers (representing the intra-lab variation) is randomly jittered around the vertical axis of the box plot to make it easier to visualize all the sites, even when the CV values are relatively close to each other.

Peptide LEP-IND for site 52 had missing data for the blank runs, and hence the LOD/LOQ could not be calculated, and the best transition is indeterminate, as such, site 52 is missing for LEP-IND. Peptide MBP-YLA was not reliably detected in Study III, and is therefore not shown in Supplementary Figure 2 [in Supplementary Figure 3, the poor quantitation of this peptide is clearly brought out in the MBP-YLA plot].

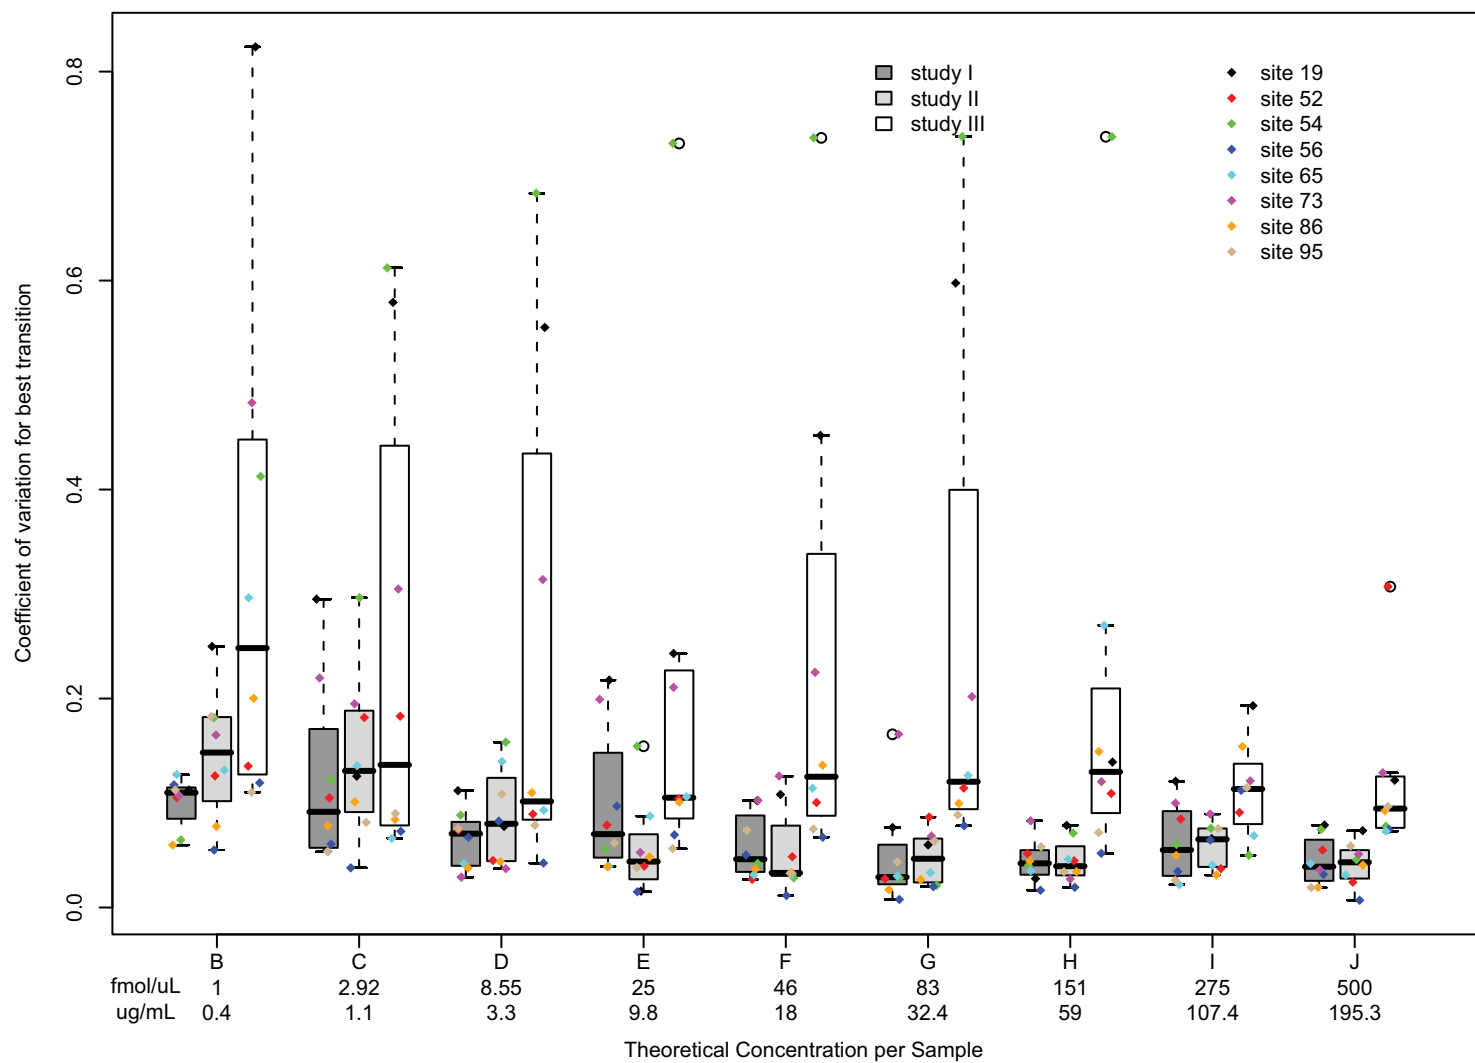

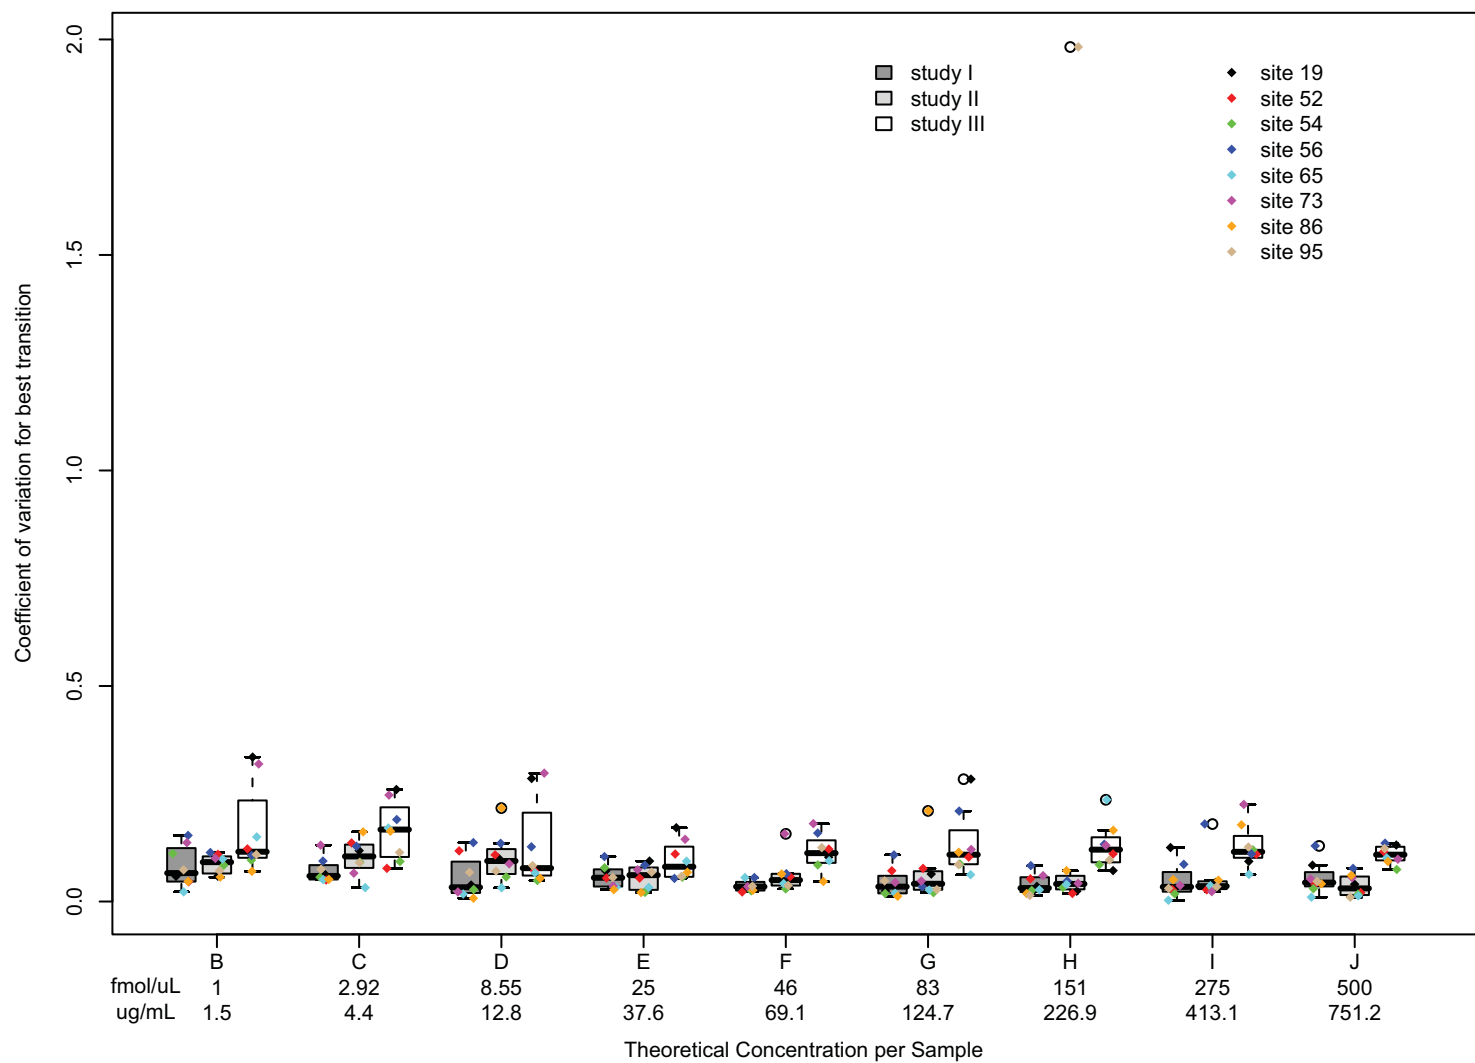

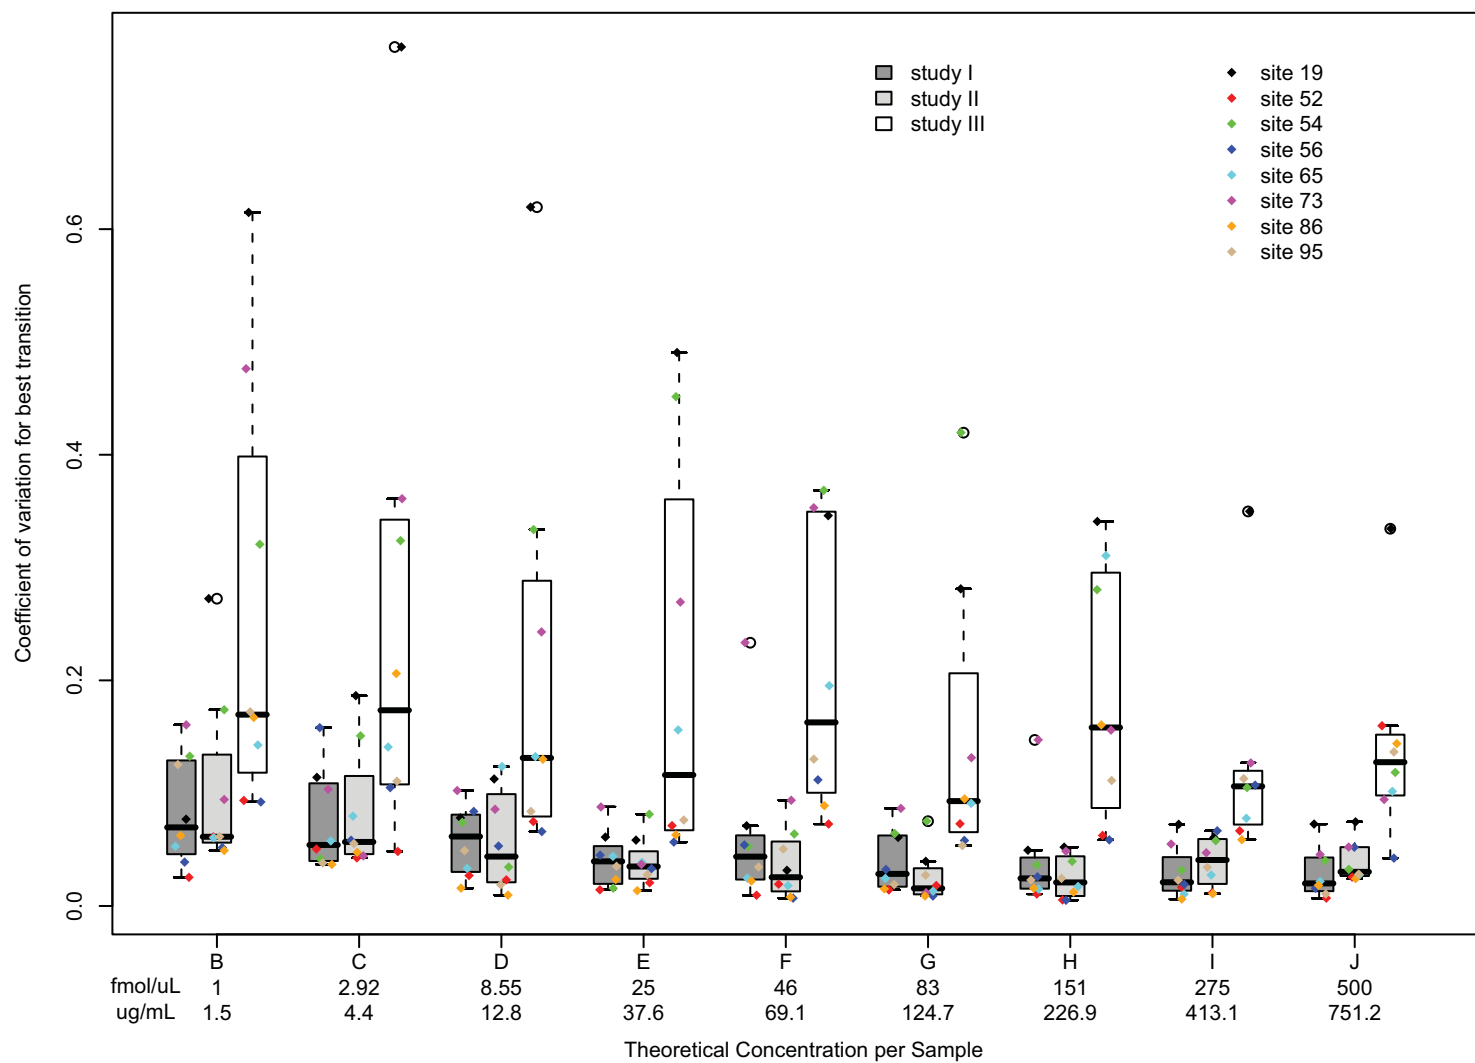



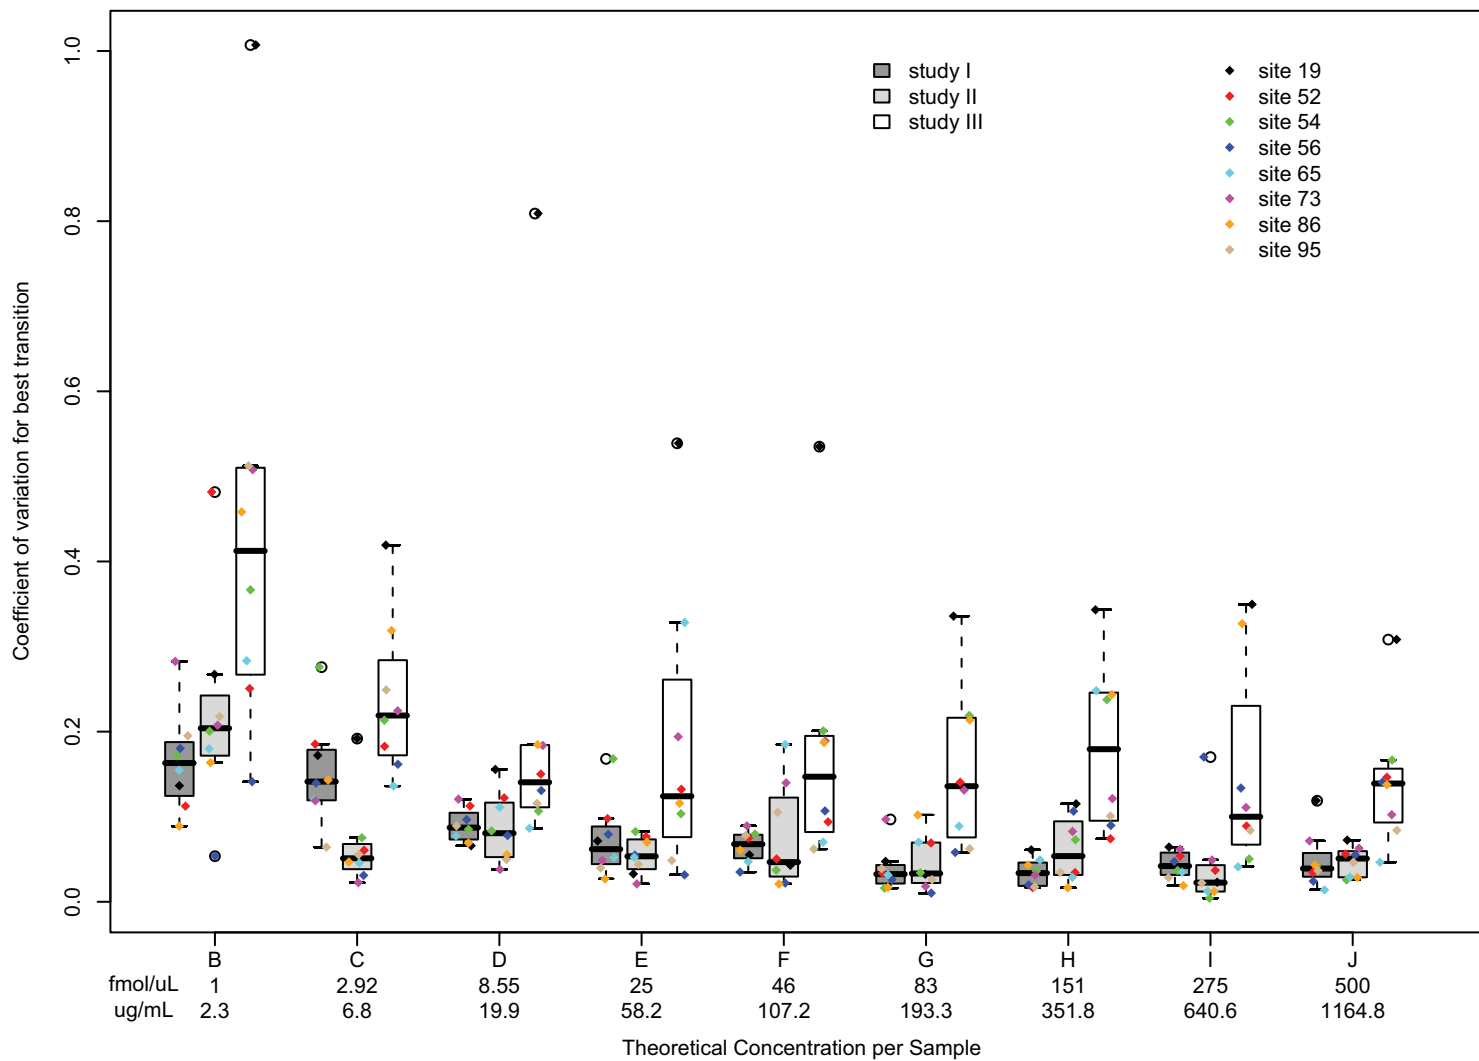

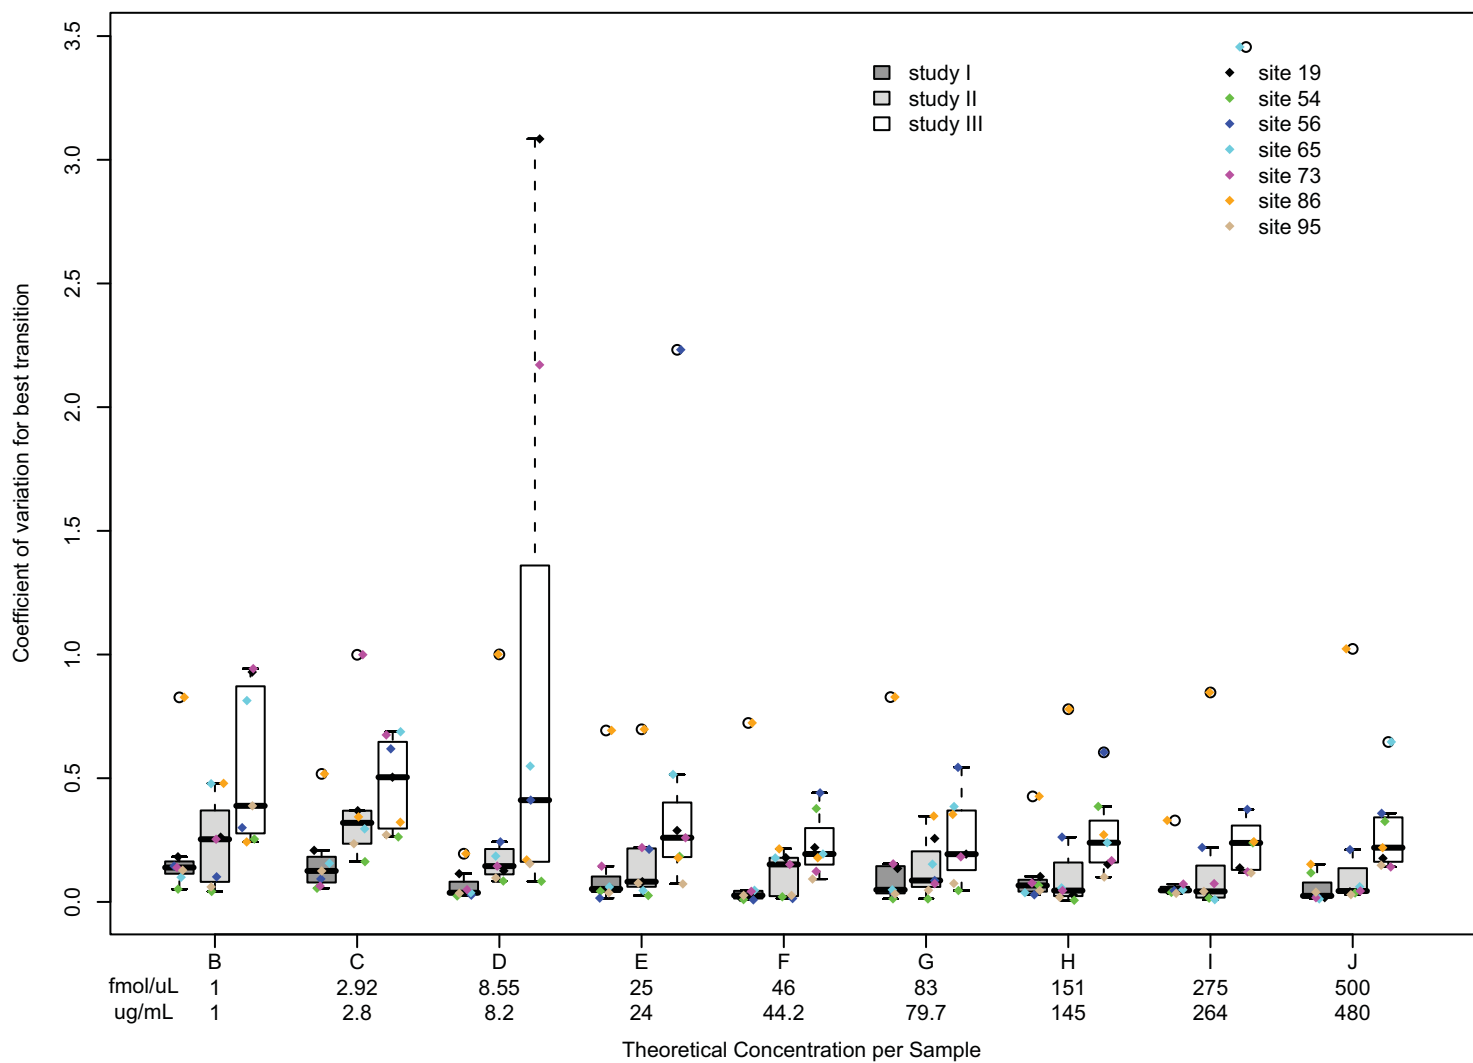

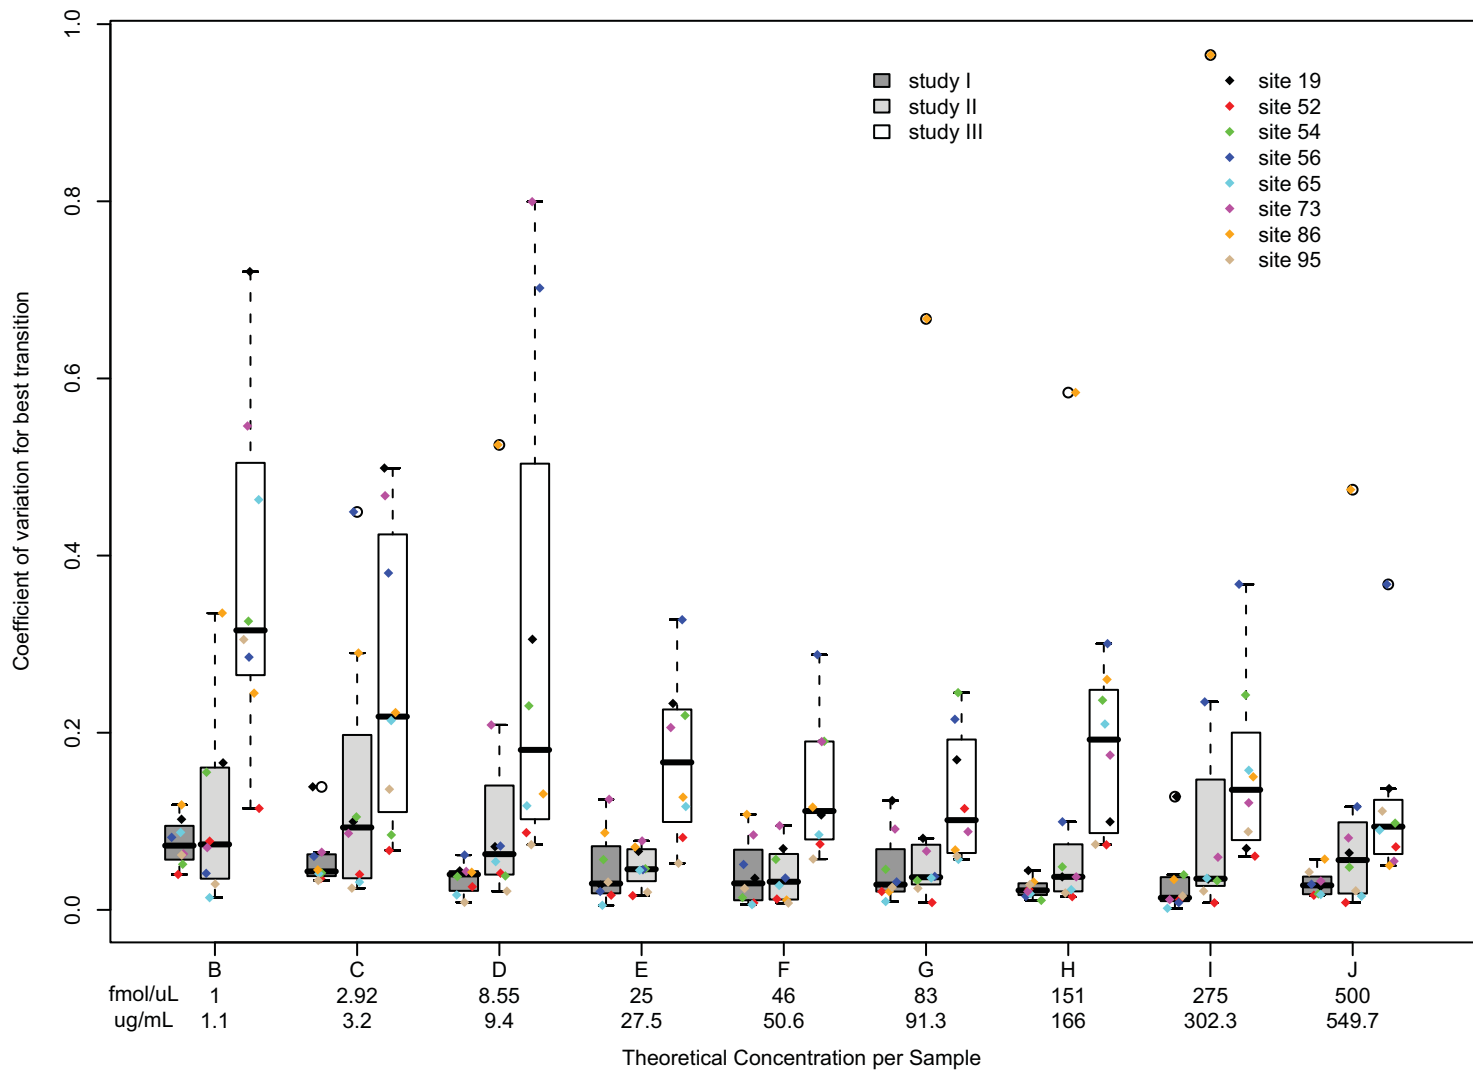

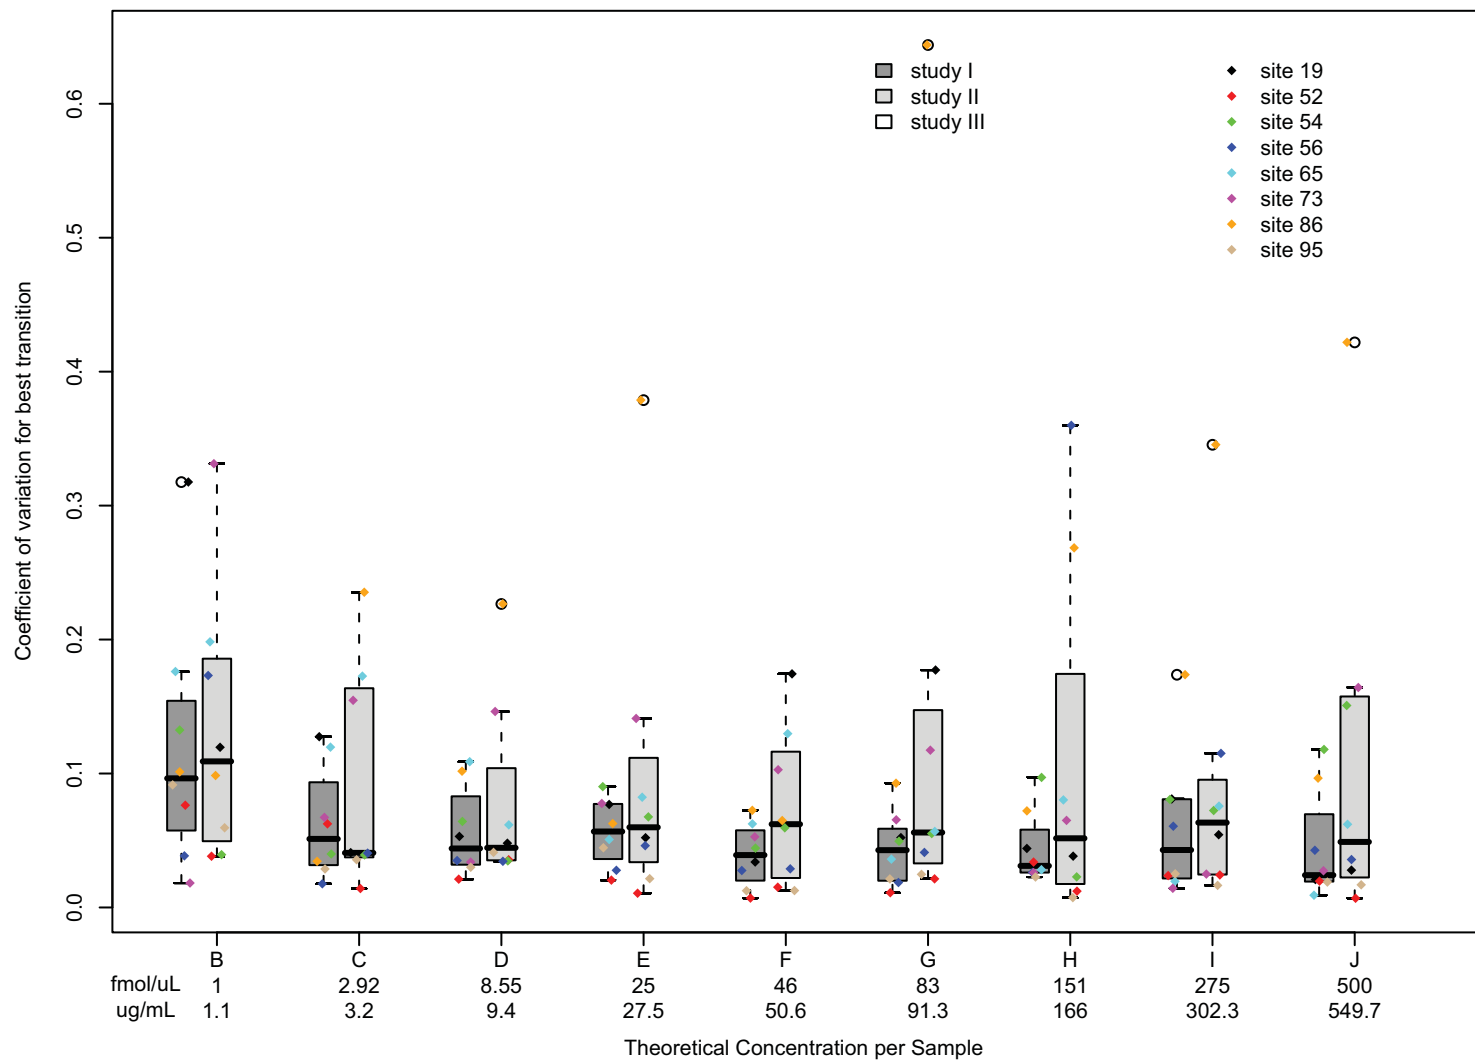

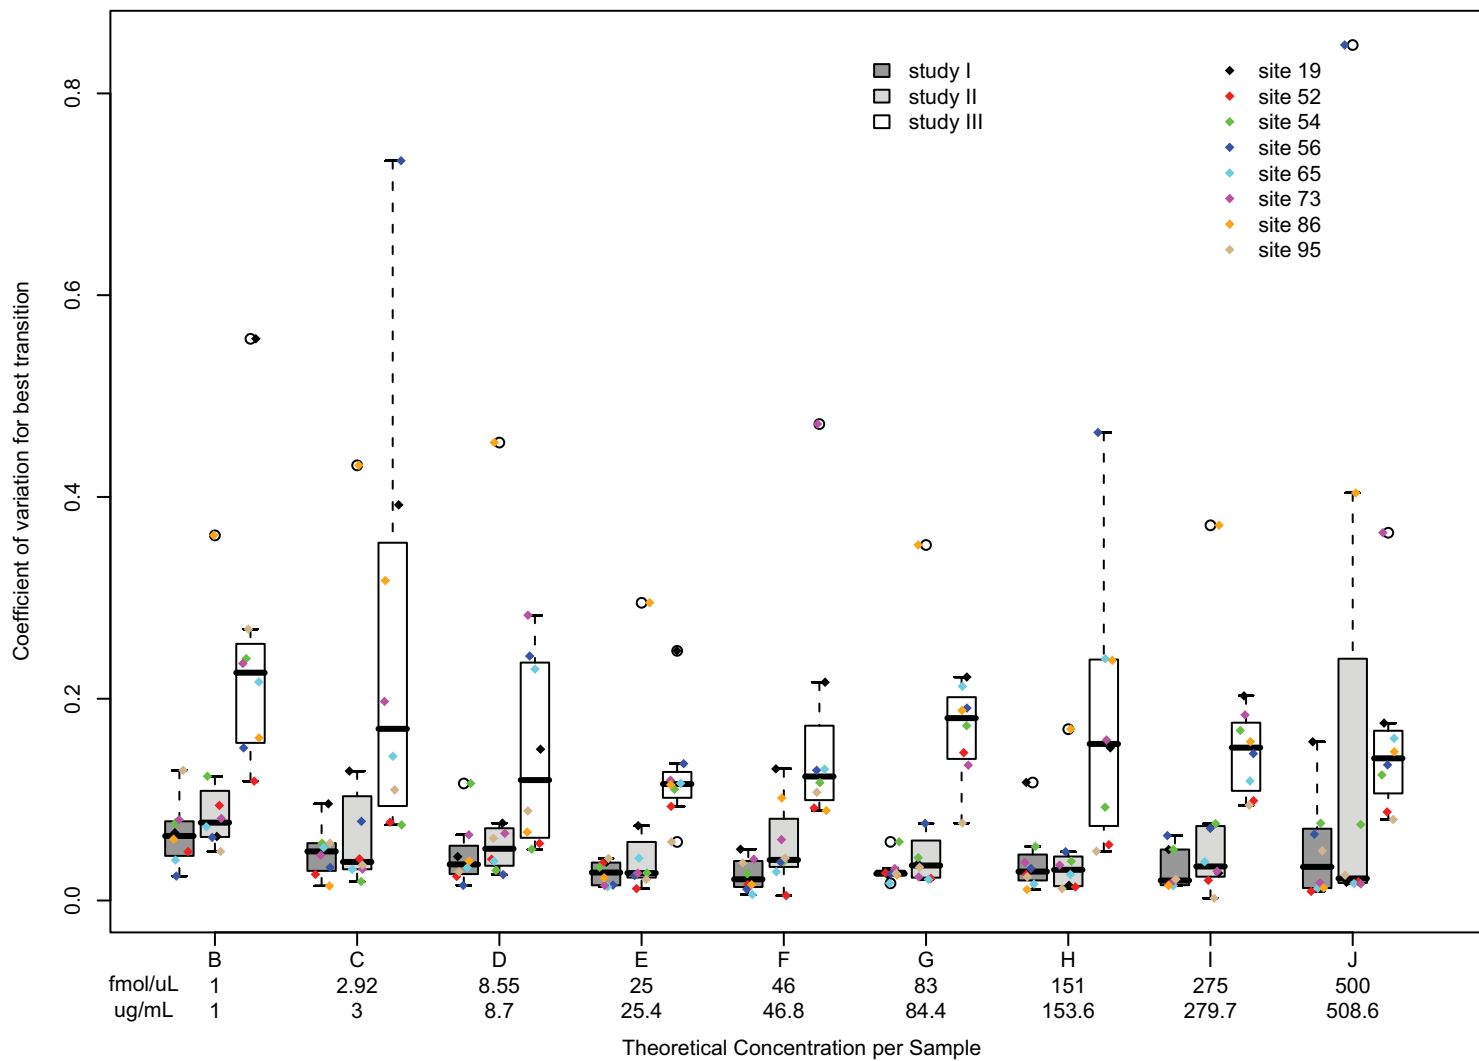

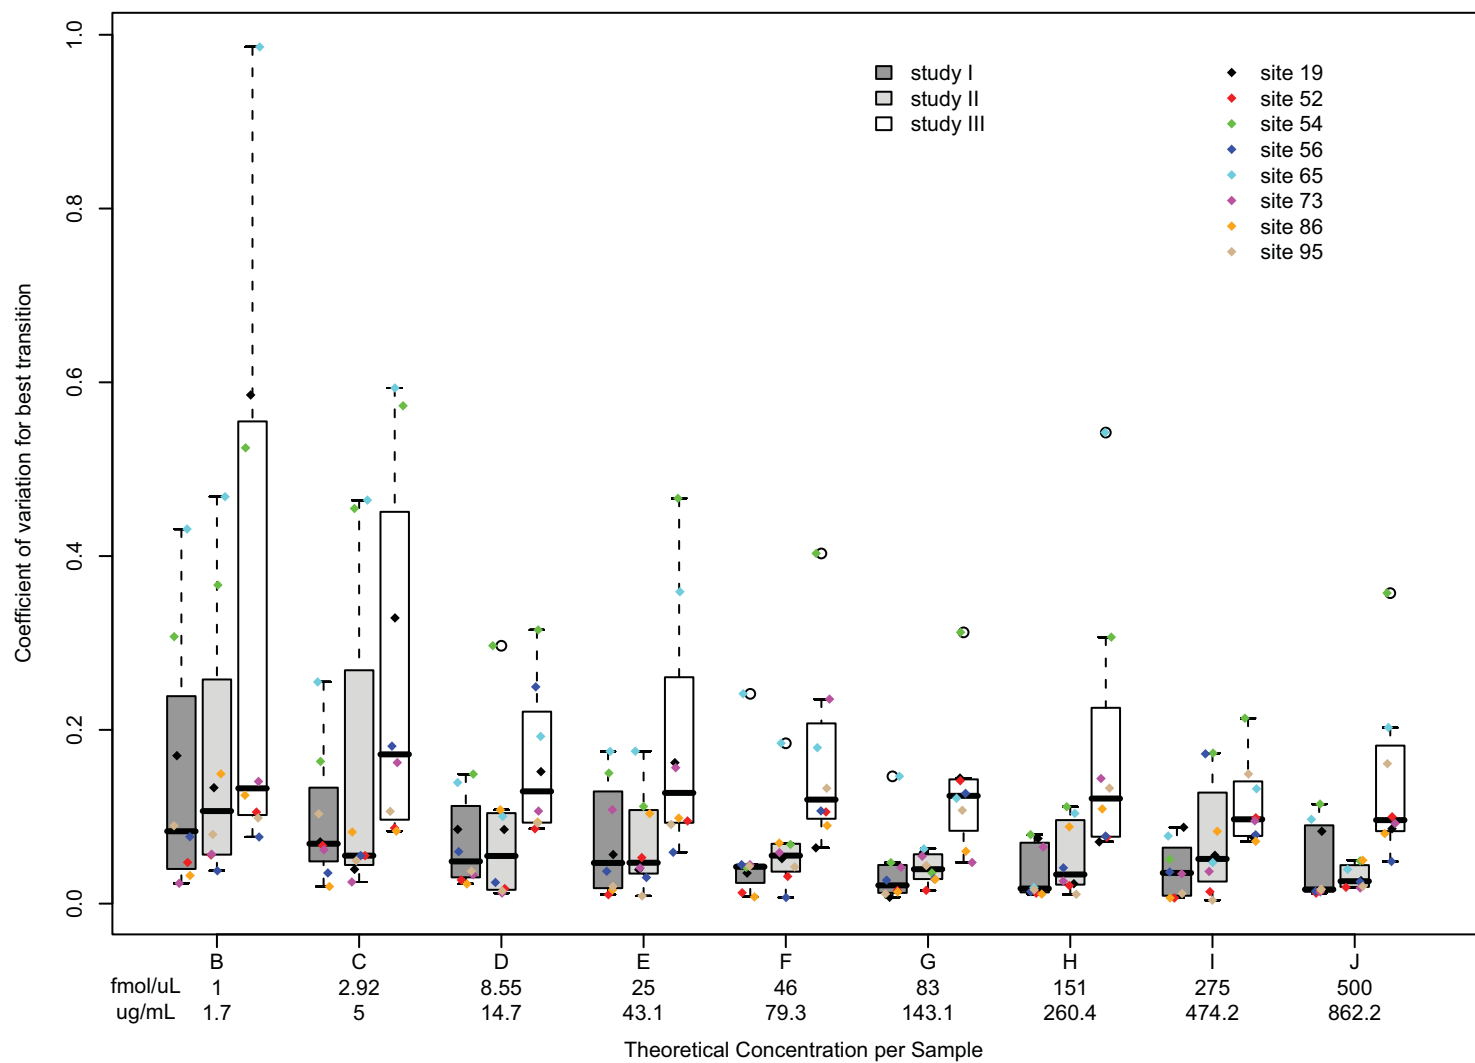

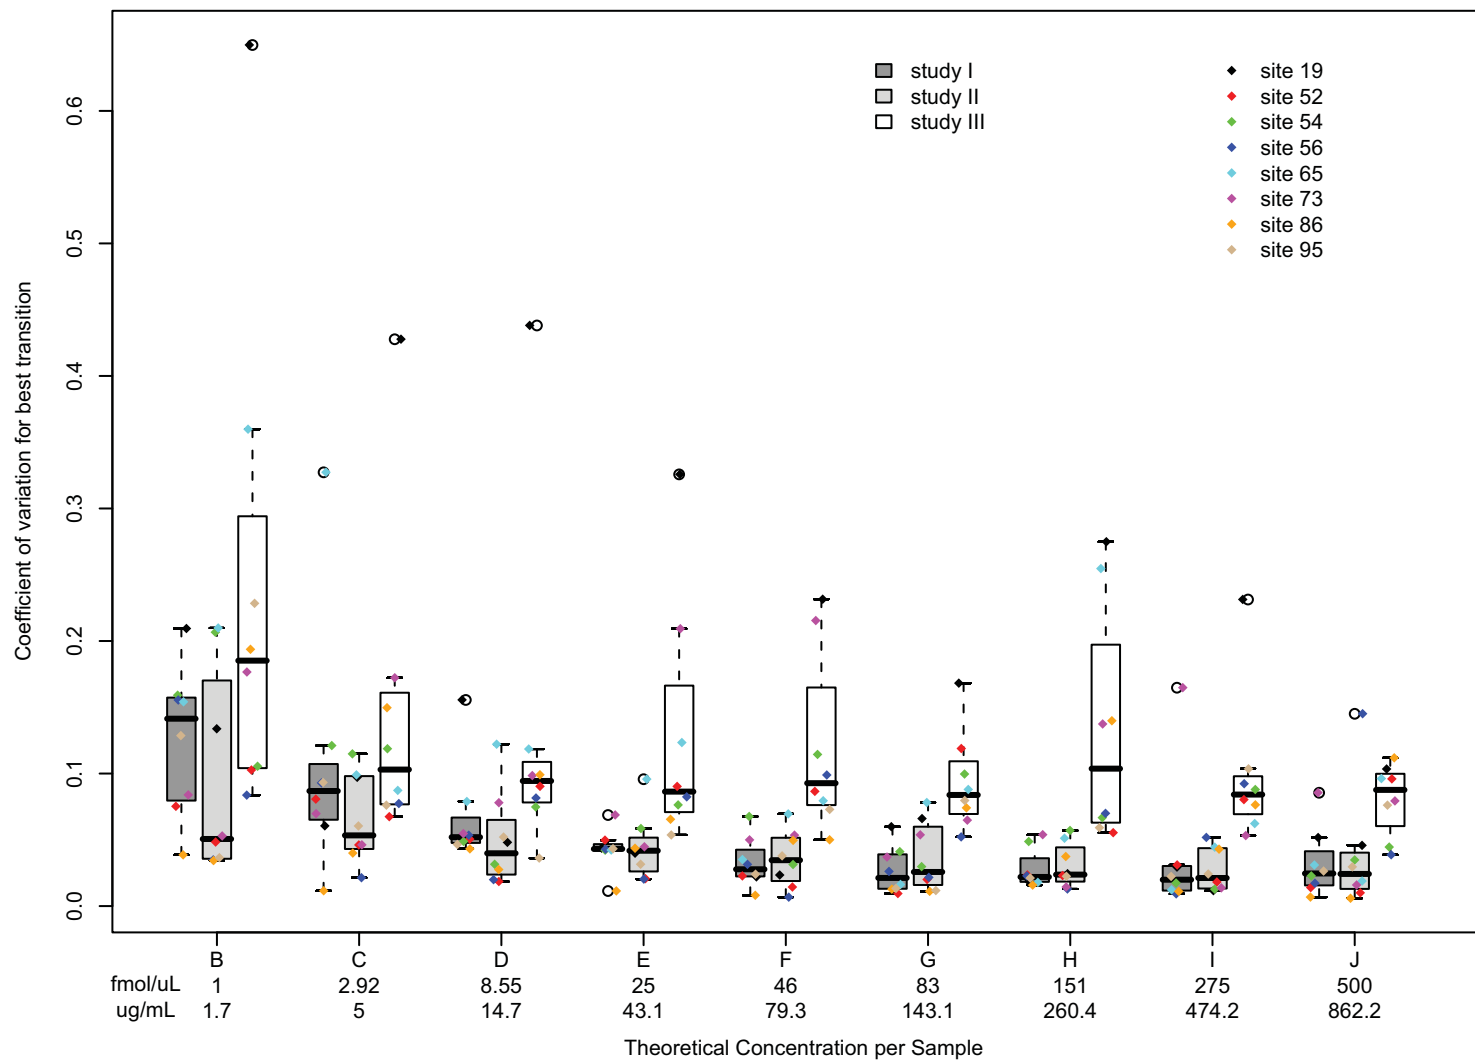

**Supplementary Figure 3:** Intra- and inter-lab variation of assay CV (coefficient of variation) across studies IIIa, IIIb and IIIc, for the entire range (1-500 fmol/ $\mu$ l) of spike in concentrations of the (light) analyte in diluted plasma. Protein concentration in  $\mu$ g/mL on x-axis is  $\mu$ g protein equivalent in 1 mL of neat plasma.

Analyte concentrations are arranged along the x-axis in sample order. Plots show the study III variation decomposed into the individual process replicates IIIa, IIIb, and IIIc. At each concentration, three box and whisker plots summarize CV variation for studies IIIa-c, respectively.

The box plots show inter-lab CV as the median of intra-lab CVs, with the box spanning the interquartile range (IQR), with the whiskers extending to  $1.5 * \text{IQR}$ . Values beyond  $1.5 * \text{IQR}$  are deemed outliers, and marked by o. Within each box plot, the actual intra-lab CV values for the individual sites are shown with color coded markers. The CV values are calculated based on the single best performing transition (lowest combined CV) across studies I and II. This same transition is also used for study III, in addition to determining LOD and LOQ.

In the plots, the y-axes ranges are different for different peptides to effectively visualize the CV variation for that particular peptide, with some peptides having relatively small inter- and intra-lab variations in comparison.

The placement of color coded site markers (representing the intra-lab variation) is randomly jittered around the vertical axis of the box plot to make it easier to visualize all the sites, even when the CV values are relatively close to each other.

Peptide LEP-IND for site 52 had missing data for the blank runs, and hence the LOD/LOQ could not be calculated, and the best transition is indeterminate, as such, site 52 is missing for LEP-IND. Peptide MBP-YLA was not reliably detected in Study III, and therefore was not shown in Supplementary Figure 2, however in the following Supplementary Figure 3, the poor quantitation of this peptide is clearly brought out in the MBP-YLA plot.



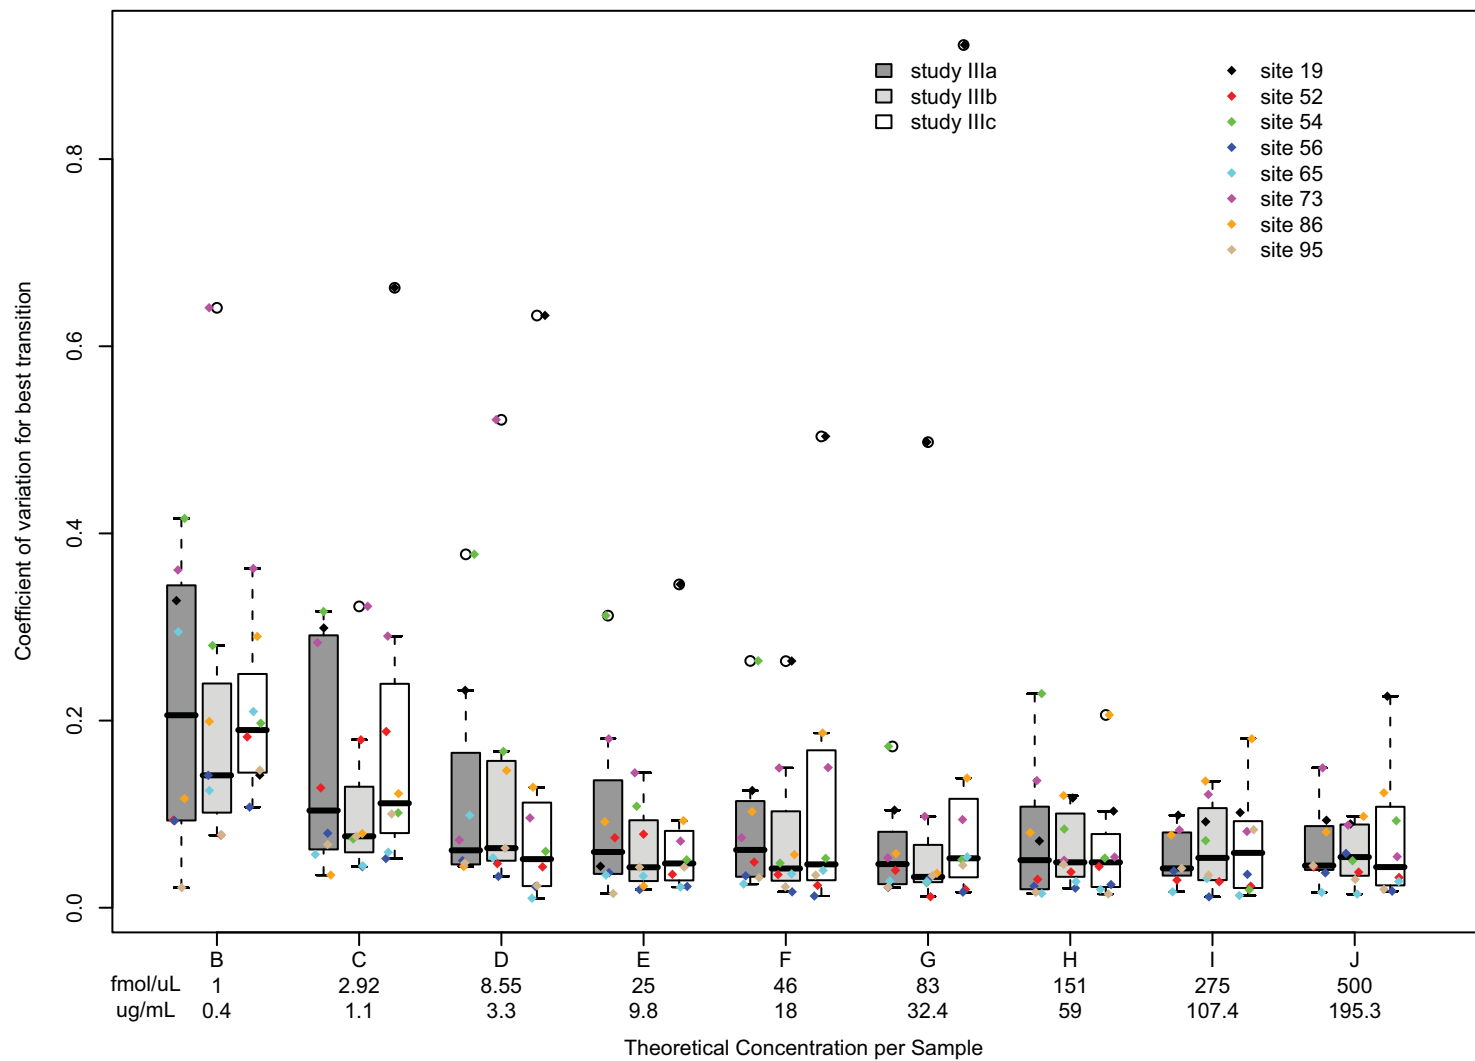

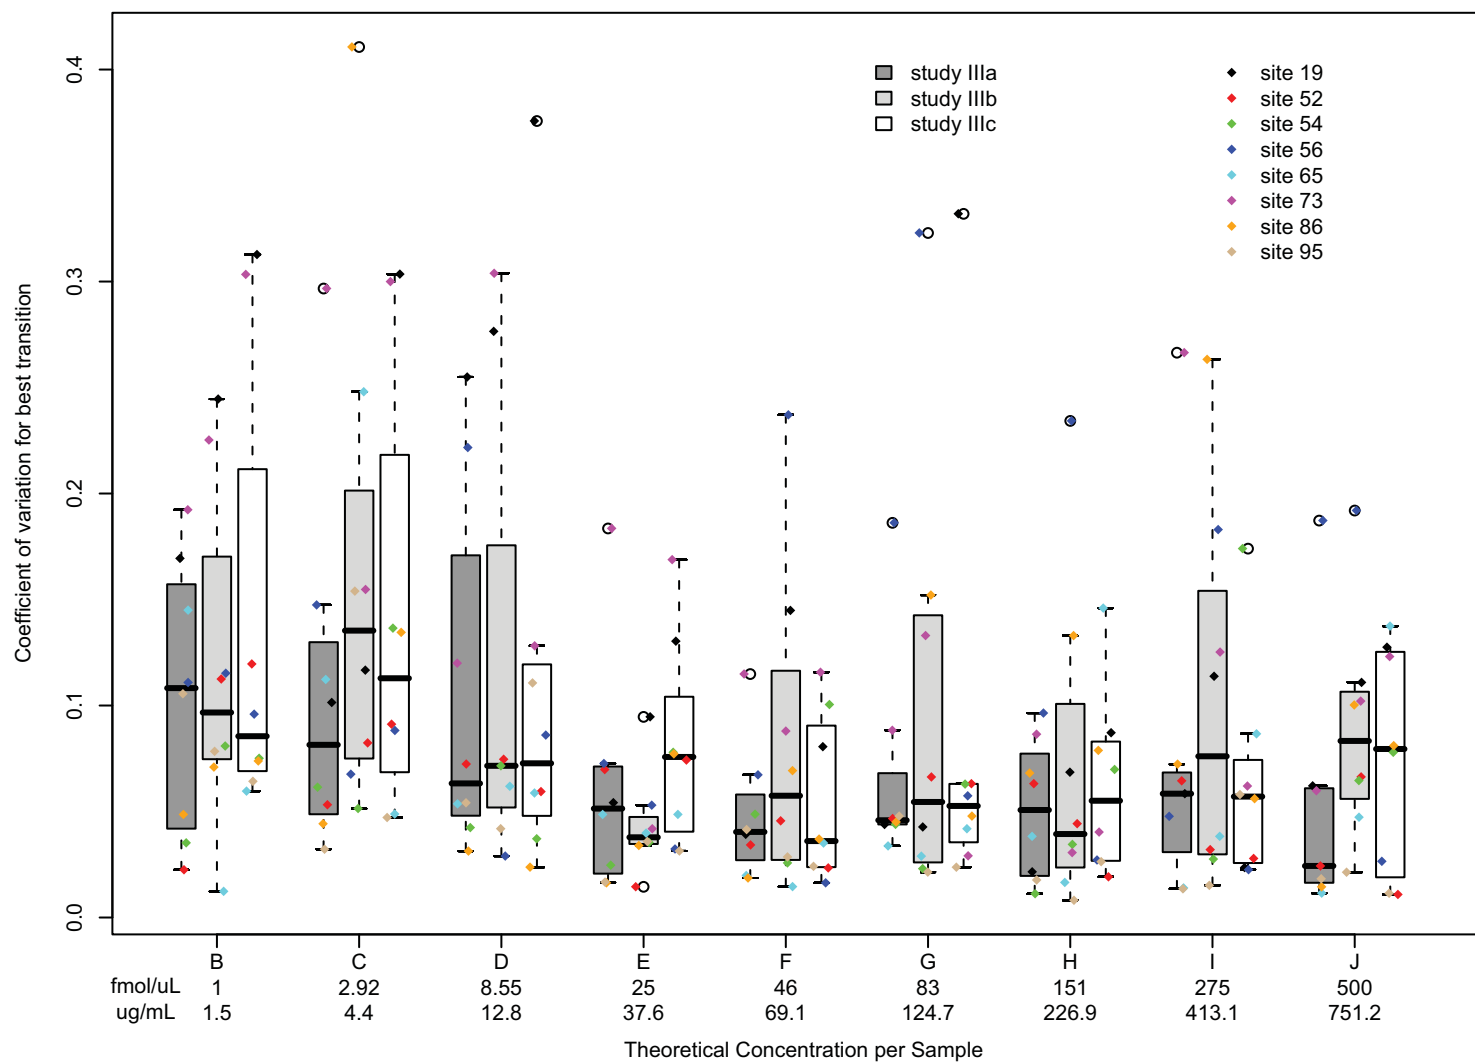

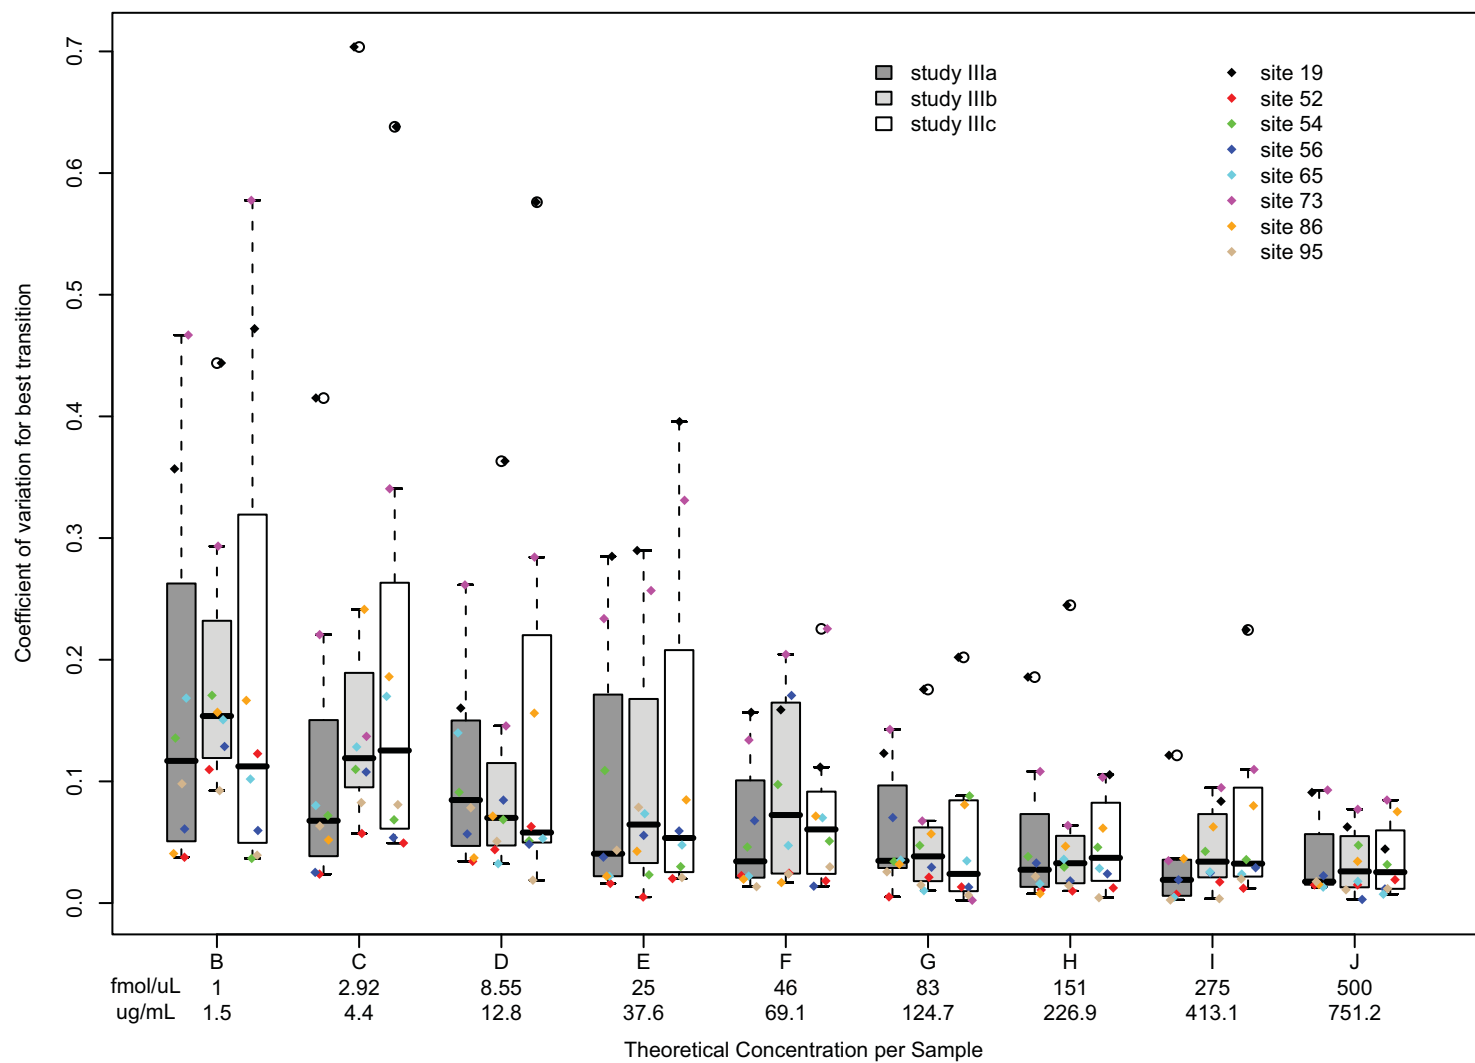

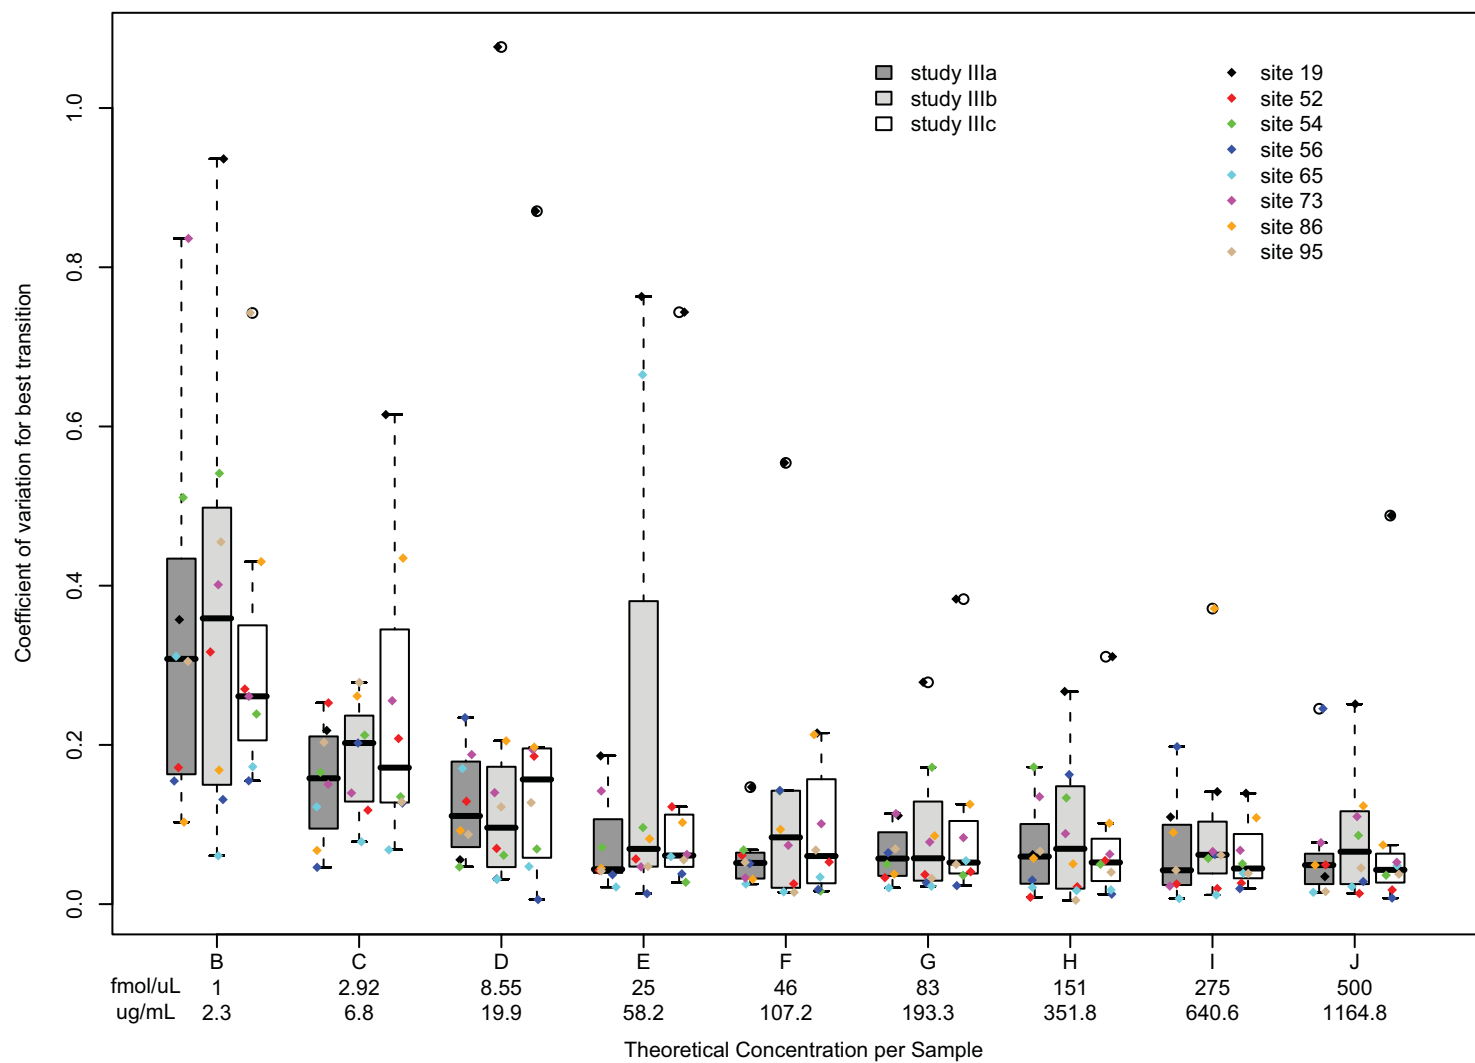

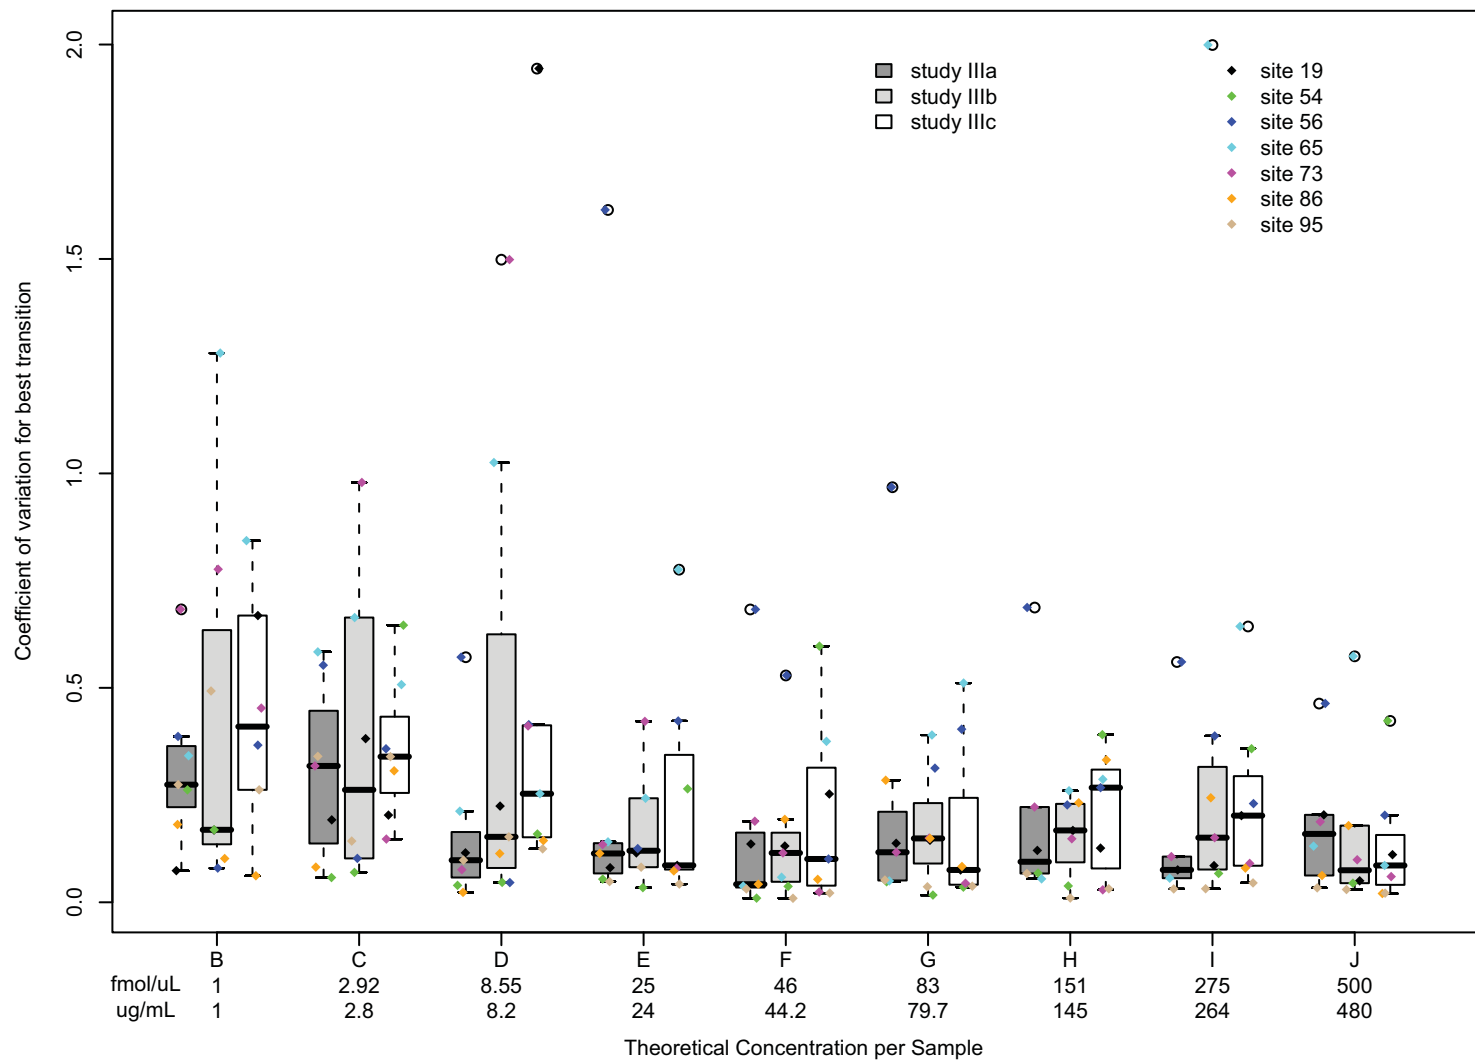

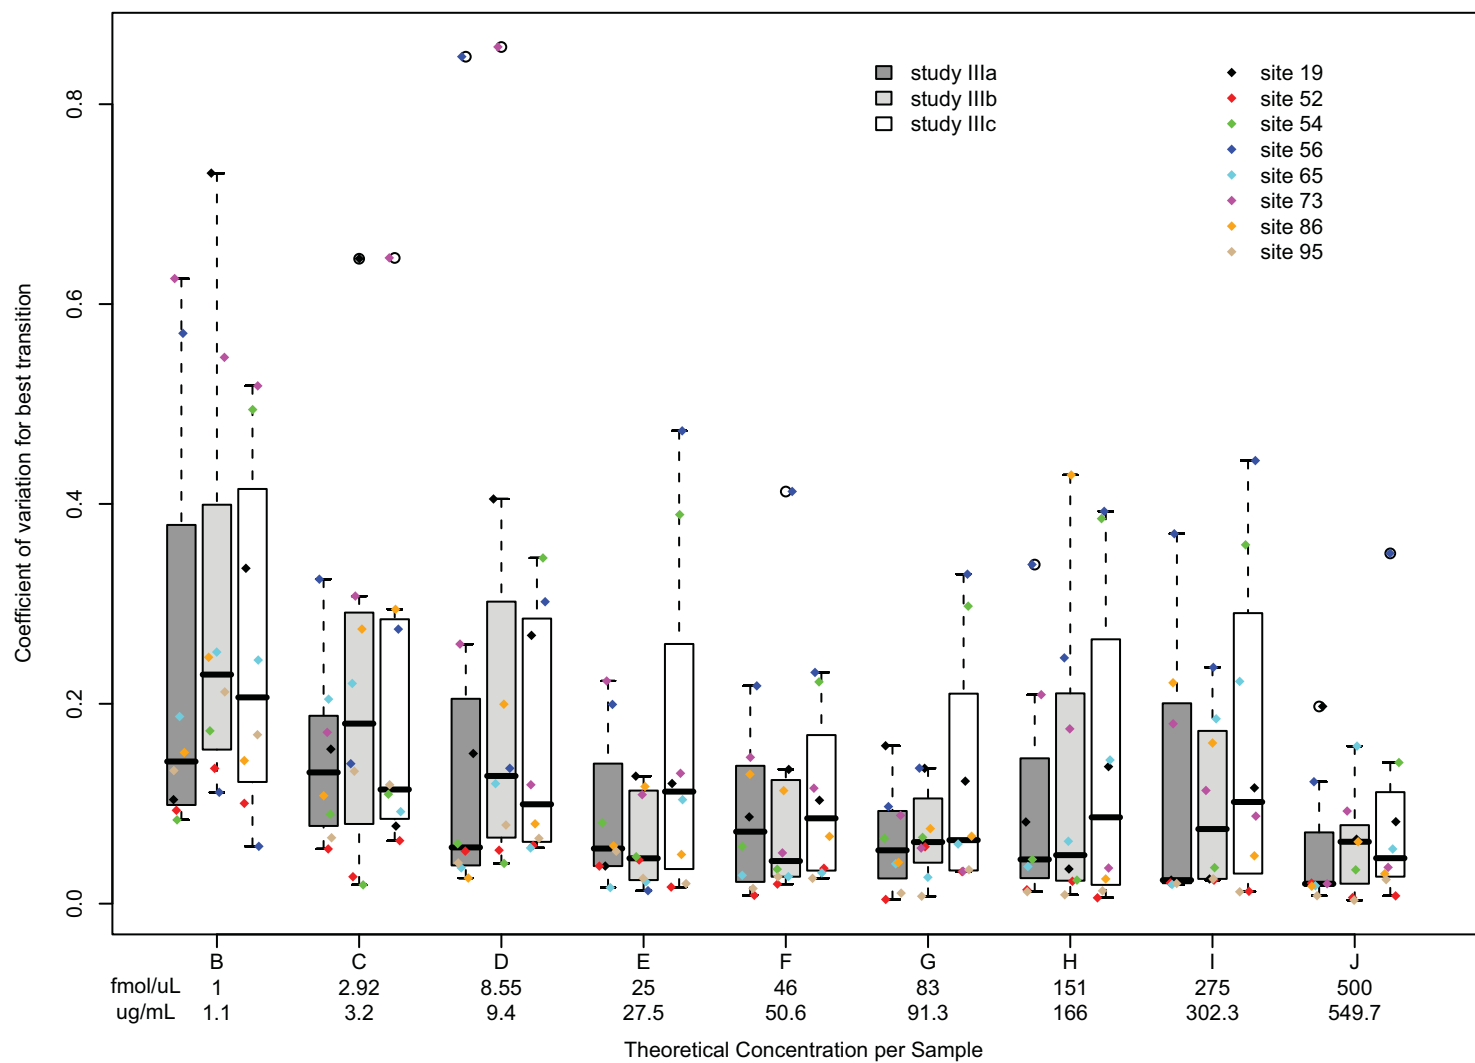

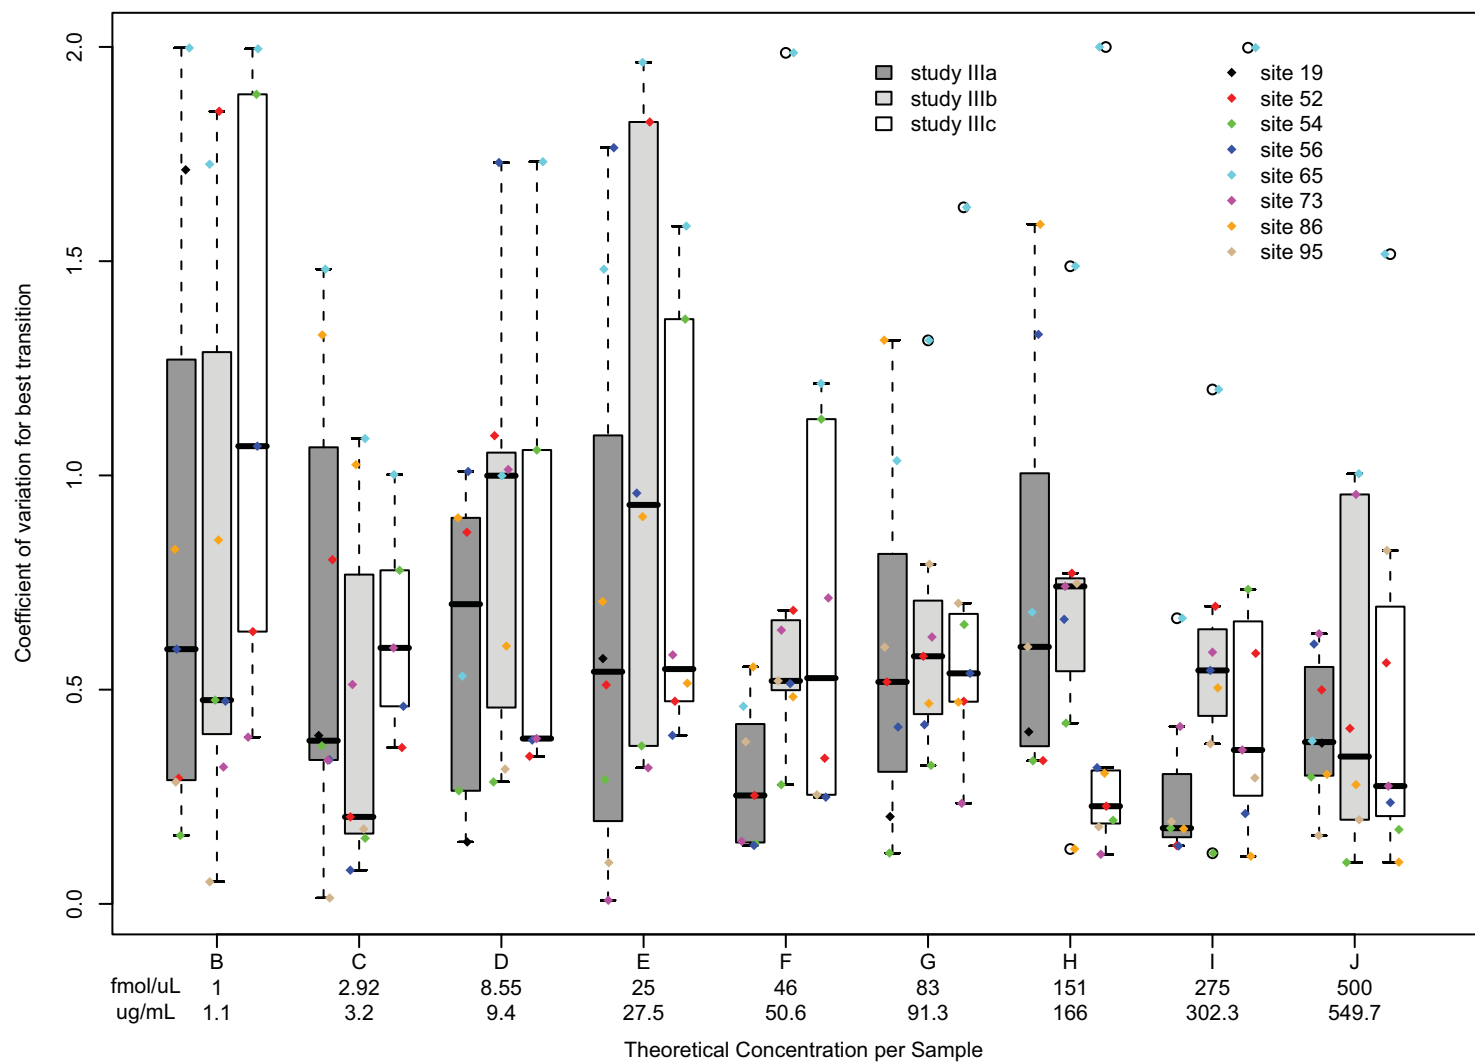

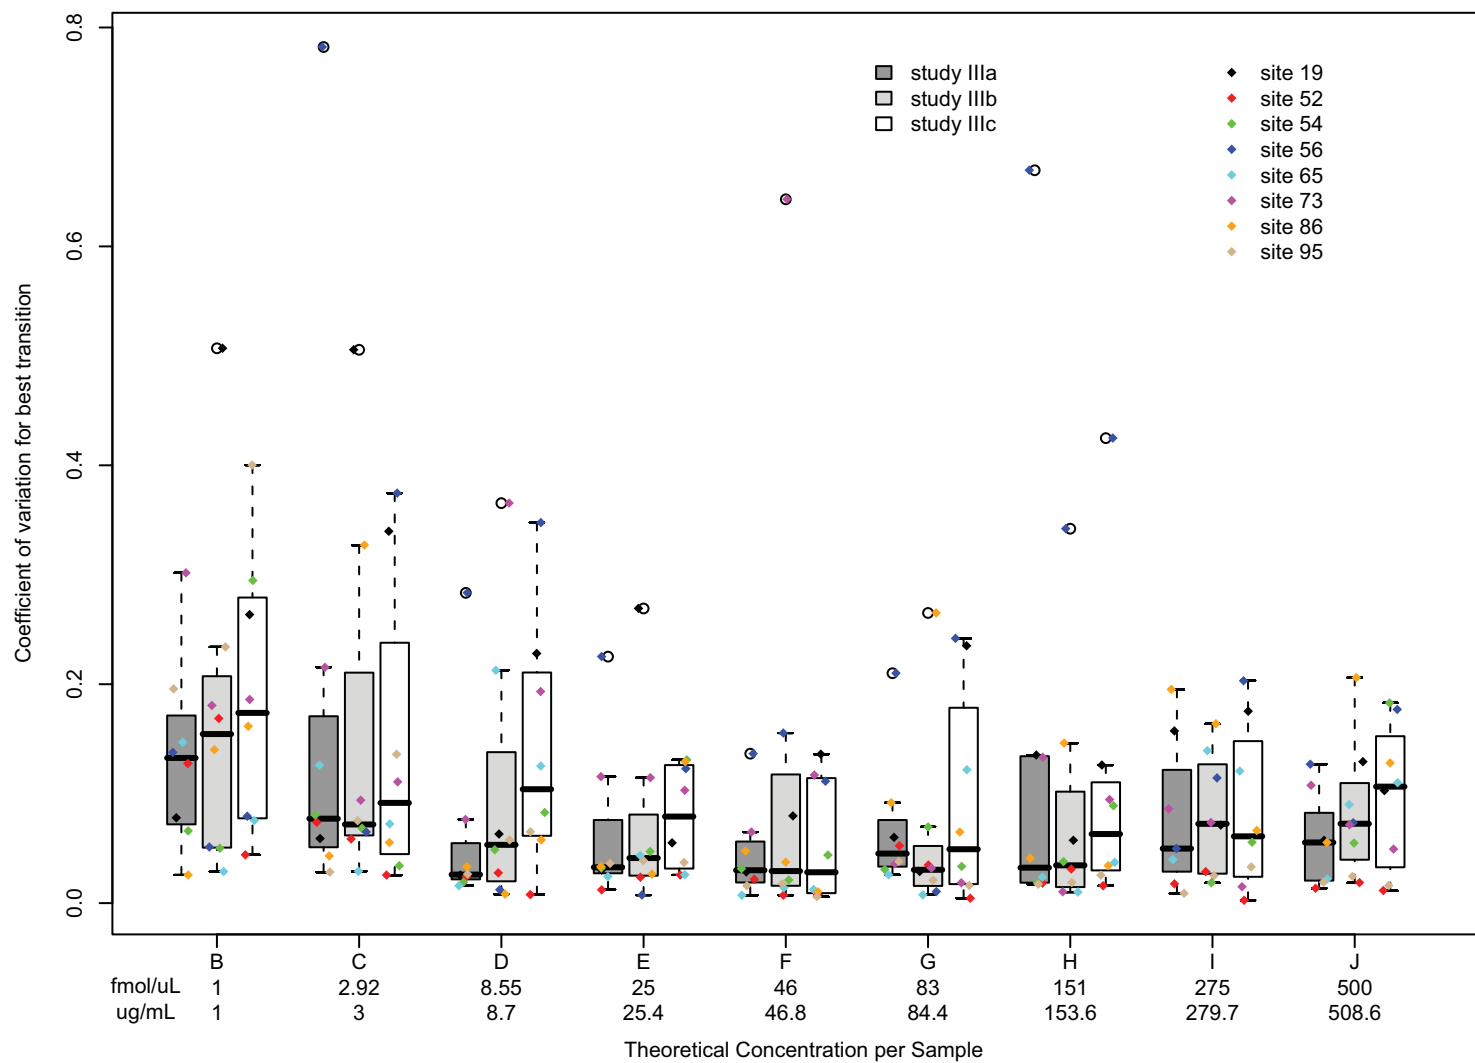



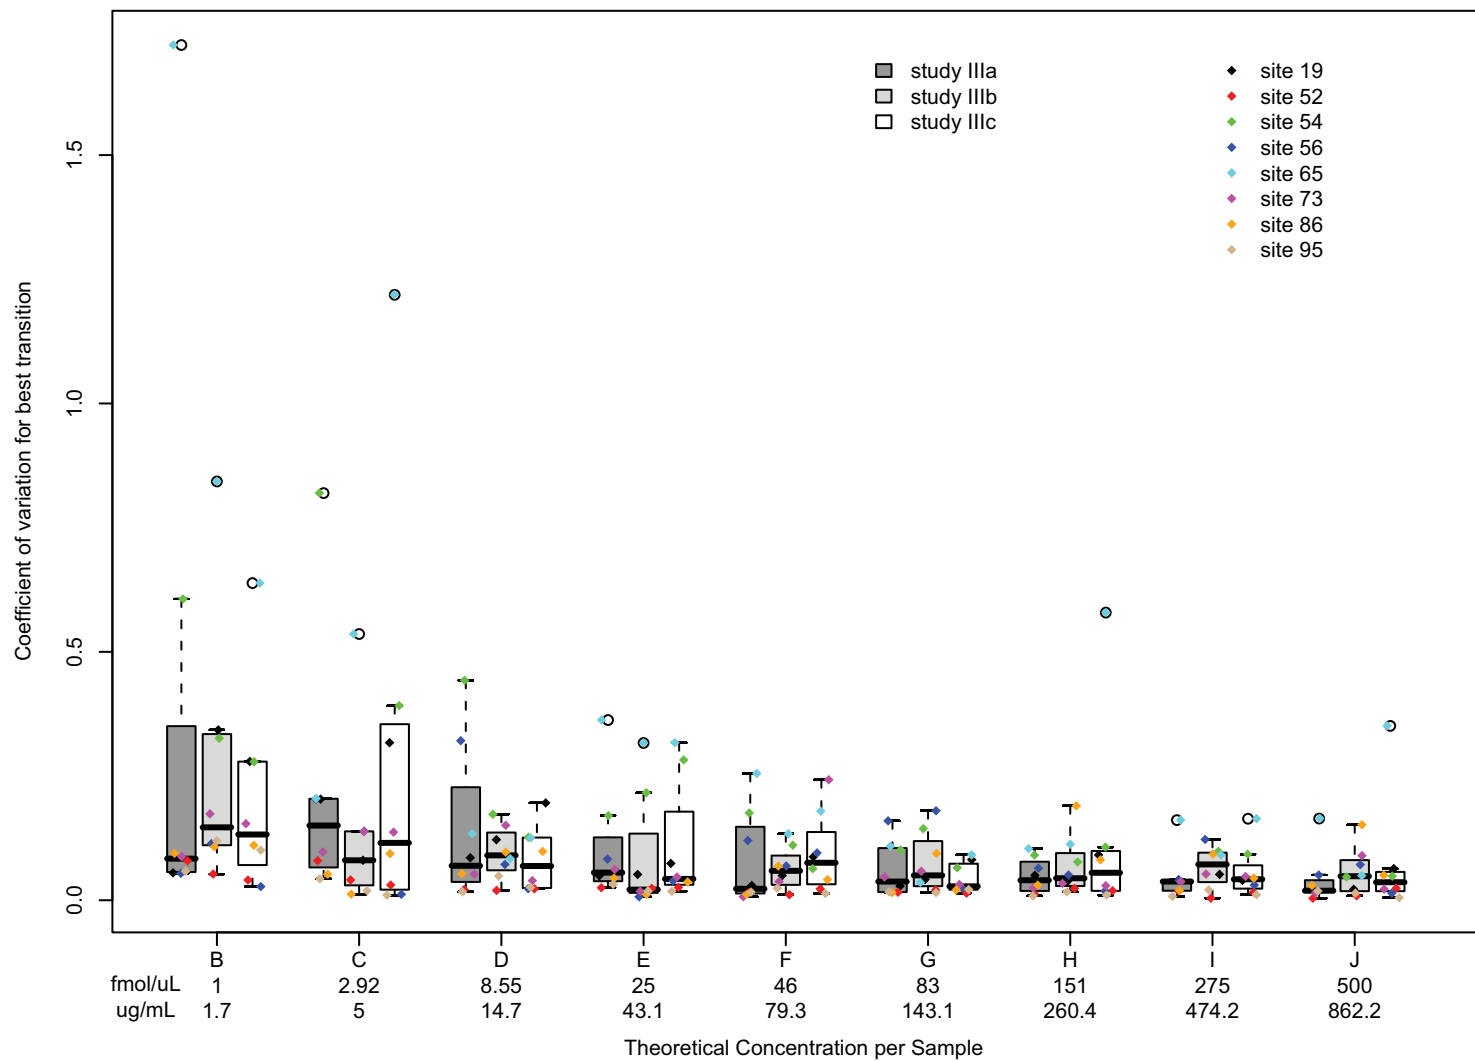

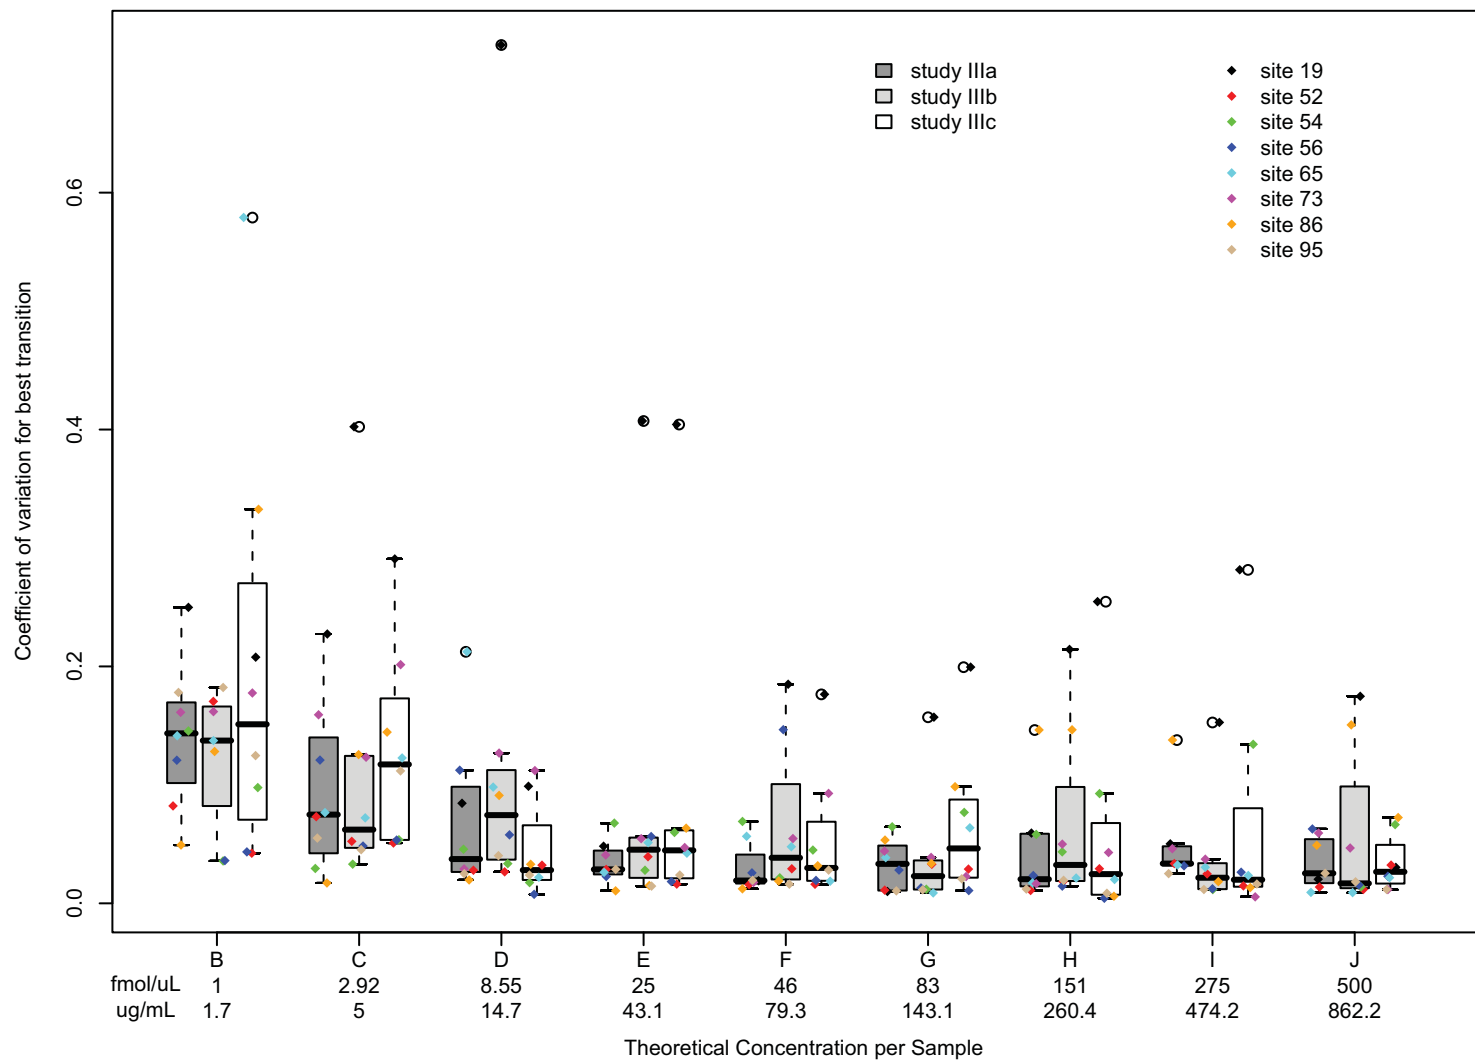

**Supplementary Figure 4:** Box plot of LOD values for each peptide for Studies I and II. The median LOD values calculated from Studies I and II in 60-fold diluted plasma are shown. The inset values display the conversion of median LOD to  $\mu\text{g/mL}$  ( $\mu\text{g}$  protein equivalent per 1 mL neat plasma) for each peptide.

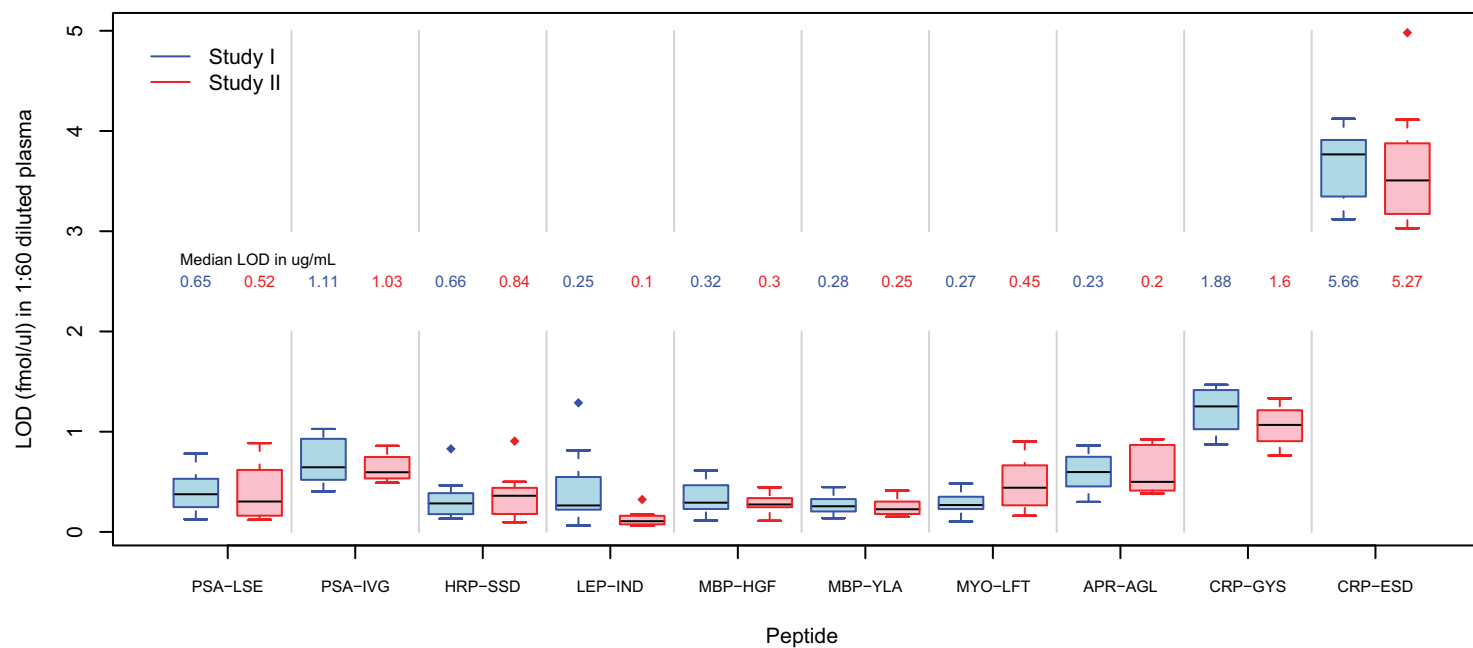

**Supplementary Table 3:** LOD and LOQ values calculated for each peptide at each site. The MRM transition used for each calculation is shown, along with its fragment ion type.

| Site Code | Peptide Sequence | Peptide Code | Transition *<br>(1, 2, 3) | Fragment Ion Type | Study I       |               | Study II      |               |
|-----------|------------------|--------------|---------------------------|-------------------|---------------|---------------|---------------|---------------|
|           |                  |              |                           |                   | LOD (fmol/uL) | LOQ (fmol/uL) | LOD (fmol/uL) | LOQ (fmol/uL) |
| 19        | PSA-LSE          | bi0037       | 37tr3_A                   | y9                | 0.404         | 1.21          | 0.351         | 1.05          |
| 19        | PSA-IVG          | bi0161       | 161tr2_A                  | y7                | 0.931         | 2.79          | 0.622         | 1.86          |
| 19        | HRP-SSD          | bi0166       | 166tr2_A                  | y8                | 0.280         | 0.84          | 0.381         | 1.14          |
| 19        | LEP-IND          | bi0167       | 167tr2_A                  | y12 <sup>2+</sup> | 0.263         | 0.79          | 0.107         | 0.32          |
| 19        | MBP-HGL          | bi0169       | 169tr3_A                  | y5                | 0.281         | 0.84          | 0.289         | 0.87          |
| 19        | MBP-YLA          | bi0170       | 170tr2_A                  | y10 <sup>2+</sup> | 0.448         | 1.34          | 0.221         | 0.66          |
| 19        | MYO-LFT          | bi0171       | 171tr1_A                  | y9 <sup>2+</sup>  | 0.230         | 0.69          | 0.324         | 0.97          |
| 19        | APR-AGL          | bi0173       | 173tr2_A                  | y8                | 0.503         | 1.51          | 0.924         | 2.77          |
| 19        | CRP-GYS          | bi0202       | 202tr3_A                  | y8                | 1.375         | 4.12          | 1.041         | 3.12          |
| 19        | CRP-ESD          | bi0231       | 231tr2_A                  | y6                | 3.739         | 11.22         | 3.140         | 9.42          |
| 52        | PSA-LSE          | bi0037       | 37tr3_A                   | y9                | 0.235         | 0.70          | 0.887         | 2.66          |
| 52        | PSA-IVG          | bi0161       | 161tr2_A                  | y7                | 0.405         | 1.22          | 0.764         | 2.29          |
| 52        | HRP-SSD          | bi0166       | 166tr3_A                  | y10               | 0.207         | 0.62          | 0.906         | 2.72          |
| 52        | MBP-HGL          | bi0169       | 169tr3_A                  | y5                | 0.612         | 1.84          | 0.259         | 0.78          |
| 52        | MBP-YLA          | bi0170       | 170tr2_A                  | y10 <sup>2+</sup> | 0.247         | 0.74          | 0.275         | 0.83          |
| 52        | MYO-LFT          | bi0171       | 171tr1_A                  | y9 <sup>2+</sup>  | 0.482         | 1.45          | 0.902         | 2.70          |
| 52        | APR-AGL          | bi0173       | 173tr3_A                  | y9                | 0.694         | 2.08          | 0.835         | 2.50          |
| 52        | CRP-GYS          | bi0202       | 202tr3_A                  | y8                | 0.942         | 2.83          | 1.334         | 4.00          |
| 52        | CRP-ESD          | bi0231       | 231tr3_A                  | y7                | 4.024         | 12.07         | 4.981         | 14.94         |
| 54        | PSA-LSE          | bi0037       | 37tr3_A                   | y9                | 0.594         | 1.78          | 0.699         | 2.10          |
| 54        | PSA-IVG          | bi0161       | 161tr1_A                  | y6                | 0.598         | 1.79          | 0.514         | 1.54          |
| 54        | HRP-SSD          | bi0166       | 166tr3_A                  | y10               | 0.148         | 0.44          | 0.226         | 0.68          |
| 54        | LEP-IND          | bi0167       | 167tr2_A                  | y12 <sup>2+</sup> | 0.064         | 0.19          | 0.063         | 0.19          |
| 54        | MBP-HGL          | bi0169       | 169tr3_A                  | y5                | 0.177         | 0.53          | 0.386         | 1.16          |
| 54        | MBP-YLA          | bi0170       | 170tr2_A                  | y10 <sup>2+</sup> | 0.265         | 0.80          | 0.201         | 0.60          |
| 54        | MYO-LFT          | bi0171       | 171tr2_A                  | y10 <sup>2+</sup> | 0.263         | 0.79          | 0.401         | 1.20          |
| 54        | APR-AGL          | bi0173       | 173tr2_A                  | y8                | 0.423         | 1.27          | 0.901         | 2.70          |
| 54        | CRP-GYS          | bi0202       | 202tr3_A                  | y8                | 1.108         | 3.32          | 1.327         | 3.98          |
| 54        | CRP-ESD          | bi0231       | 231tr1_A                  | y5                | 3.380         | 10.14         | 3.373         | 10.12         |
| 56        | PSA-LSE          | bi0037       | 37tr3_A                   | y9                | 0.781         | 2.34          | 0.121         | 0.36          |
| 56        | PSA-IVG          | bi0161       | 161tr2_A                  | y7                | 0.927         | 2.78          | 0.490         | 1.47          |
| 56        | HRP-SSD          | bi0166       | 166tr2_A                  | y8                | 0.464         | 1.39          | 0.098         | 0.29          |
| 56        | LEP-IND          | bi0167       | 167tr1_A                  | y11 <sup>2+</sup> | 0.282         | 0.85          | 0.062         | 0.19          |
| 56        | MBP-HGL          | bi0169       | 169tr3_A                  | y5                | 0.343         | 1.03          | 0.110         | 0.33          |
| 56        | MBP-YLA          | bi0170       | 170tr2_A                  | y10 <sup>2+</sup> | 0.247         | 0.74          | 0.232         | 0.69          |
| 56        | MYO-LFT          | bi0171       | 171tr1_A                  | y9 <sup>2+</sup>  | 0.394         | 1.18          | 0.160         | 0.48          |
| 56        | APR-AGL          | bi0173       | 173tr2_A                  | y8                | 0.805         | 2.42          | 0.444         | 1.33          |
| 56        | CRP-GYS          | bi0202       | 202tr3_A                  | y8                | 1.390         | 4.17          | 0.761         | 2.28          |
| 56        | CRP-ESD          | bi0231       | 231tr3_A                  | y7                | 4.121         | 12.36         | 3.641         | 10.92         |

| Site Code | Peptide Sequence | Peptide Code | Transition *<br>(1, 2, 3) | Fragment Ion Type | Study I       |               | Study II      |               |
|-----------|------------------|--------------|---------------------------|-------------------|---------------|---------------|---------------|---------------|
|           |                  |              |                           |                   | LOD (fmol/uL) | LOQ (fmol/uL) | LOD (fmol/uL) | LOQ (fmol/uL) |
| 65        | PSA-LSE          | bi0037       | 37tr2_A                   | y8                | 0.348         | 1.05          | 0.538         | 1.61          |
| 65        | PSA-IVG          | bi0161       | 161tr1_A                  | y6                | 1.027         | 3.08          | 0.858         | 2.57          |
| 65        | HRP-SSD          | bi0166       | 166tr3_A                  | y10               | 0.289         | 0.87          | 0.374         | 1.12          |
| 65        | LEP-IND          | bi0167       | 167tr1_A                  | y11 <sup>2+</sup> | 0.814         | 2.44          | 0.323         | 0.97          |
| 65        | MBP-HGL          | bi0169       | 169tr3_A                  | y5                | 0.589         | 1.77          | 0.243         | 0.73          |
| 65        | MBP-YLA          | bi0170       | 170tr3_A                  | y7                | 0.285         | 0.86          | 0.331         | 0.99          |
| 65        | MYO-LFT          | bi0171       | 171tr3_A                  | y6                | 0.105         | 0.31          | 0.695         | 2.08          |
| 65        | APR-AGL          | bi0173       | 173tr3_A                  | y8                | 0.692         | 2.08          | 0.414         | 1.24          |
| 65        | CRP-GYS          | bi0202       | 202tr2_A                  | y7                | 1.467         | 4.40          | 1.094         | 3.28          |
| 65        | CRP-ESD          | bi0231       | 231tr2_A                  | y6                | 3.313         | 9.94          | 3.031         | 9.09          |
| 73        | PSA-LSE          | bi0037       | 37tr3_A                   | y9                | 0.466         | 1.40          | 0.256         | 0.77          |
| 73        | PSA-IVG          | bi0161       | 161tr2_A                  | y7                | 0.692         | 2.08          | 0.569         | 1.71          |
| 73        | HRP-SSD          | bi0166       | 166tr2_A                  | y8                | 0.829         | 2.49          | 0.499         | 1.50          |
| 73        | LEP-IND          | bi0167       | 167tr1_A                  | y11 <sup>2+</sup> | 0.264         | 0.79          | 0.174         | 0.52          |
| 73        | MBP-HGL          | bi0169       | 169tr3_A                  | y5                | 0.291         | 0.87          | 0.250         | 0.75          |
| 73        | MBP-YLA          | bi0170       | 170tr2_A                  | y10 <sup>2+</sup> | 0.162         | 0.49          | 0.413         | 1.24          |
| 73        | MYO-LFT          | bi0171       | 171tr1_A                  | y9 <sup>2+</sup>  | 0.274         | 0.82          | 0.481         | 1.44          |
| 73        | APR-AGL          | bi0173       | 173tr3_A                  | y9                | 0.863         | 2.59          | 0.411         | 1.23          |
| 73        | CRP-GYS          | bi0202       | 202tr3_A                  | y8                | 1.441         | 4.32          | 1.101         | 3.30          |
| 73        | CRP-ESD          | bi0231       | 231tr2_A                  | y6                | 3.797         | 11.39         | 3.641         | 10.92         |
| 86        | PSA-LSE          | bi0037       | 37tr3_A                   | y9                | 0.127         | 0.38          | 0.177         | 0.53          |
| 86        | PSA-IVG          | bi0161       | 161tr2_A                  | y7                | 0.484         | 1.45          | 0.732         | 2.20          |
| 86        | HRP-SSD          | bi0166       | 166tr3_A                  | y10               | 0.131         | 0.39          | 0.132         | 0.39          |
| 86        | LEP-IND          | bi0167       | 167tr1_A                  | y11 <sup>2+</sup> | 1.288         | 3.86          | 0.148         | 0.44          |
| 86        | MBP-HGL          | bi0169       | 169tr3_A                  | y5                | 0.293         | 0.88          | 0.446         | 1.34          |
| 86        | MBP-YLA          | bi0170       | 170tr2_A                  | y10 <sup>2+</sup> | 0.371         | 1.11          | 0.157         | 0.47          |
| 86        | MYO-LFT          | bi0171       | 171tr1_A                  | y9 <sup>2+</sup>  | 0.227         | 0.68          | 0.634         | 1.90          |
| 86        | APR-AGL          | bi0173       | 173tr2_A                  | y8                | 0.485         | 1.46          | 0.384         | 1.15          |
| 86        | CRP-GYS          | bi0202       | 202tr3_A                  | y8                | 0.874         | 2.62          | 0.810         | 2.43          |
| 86        | CRP-ESD          | bi0231       | 231tr1_A                  | y5                | 3.794         | 11.38         | 4.113         | 12.34         |
| 95        | PSA-LSE          | bi0037       | 37tr3_A                   | y9                | 0.260         | 0.78          | 0.147         | 0.44          |
| 95        | PSA-IVG          | bi0161       | 161tr2_A                  | y7                | 0.556         | 1.67          | 0.553         | 1.66          |
| 95        | HRP-SSD          | bi0166       | 166tr3_A                  | y10               | 0.310         | 0.93          | 0.348         | 1.04          |
| 95        | LEP-IND          | bi0167       | 167tr2_A                  | y12 <sup>2+</sup> | 0.181         | 0.54          | 0.088         | 0.26          |
| 95        | MBP-HGL          | bi0169       | 169tr3_A                  | y5                | 0.115         | 0.35          | 0.289         | 0.87          |
| 95        | MBP-YLA          | bi0170       | 170tr2_A                  | y10 <sup>2+</sup> | 0.138         | 0.41          | 0.150         | 0.45          |
| 95        | MYO-LFT          | bi0171       | 171tr1_A                  | y9 <sup>2+</sup>  | 0.308         | 0.92          | 0.207         | 0.62          |
| 95        | APR-AGL          | bi0173       | 173tr2_A                  | y8                | 0.299         | 0.90          | 0.555         | 1.66          |
| 95        | CRP-GYS          | bi0202       | 202tr3_A                  | y8                | 1.130         | 3.39          | 1.001         | 3.00          |
| 95        | CRP-ESD          | bi0231       | 231tr1_A                  | y5                | 3.120         | 9.36          | 3.205         | 9.61          |

\* These transitions are used for calculating LOD and LOQ values for both Study I and II. LOD and LOQ values are first calculated for all transitions for each peptide at each site. The chosen best transition has an LOD with the minimum root mean square deviation from the lowest LODs for both Study I and II.

**Supplementary Table 4A:** Linear regression-derived parameters: slope, CV(slope), and mean(slope) for Study I.For Calibration Curve Plots (experimentally determined concentrations and theoretical/spiked-in concentration of signature peptides) see **Supplementary Figure 5****Study I Parameters**

| Site     | Peptide | Intercept | SE(intercept) | Slope | SE(Slope) | Sigma |
|----------|---------|-----------|---------------|-------|-----------|-------|
| site @19 | APR-AGL | 0.059     | 0.054         | 1.309 | 0.021     | 0.181 |
| site @52 | APR-AGL | 0.388     | 0.027         | 1.035 | 0.011     | 0.083 |
| site @54 | APR-AGL | 0.221     | 0.027         | 0.948 | 0.011     | 0.092 |
| site @56 | APR-AGL | 0.644     | 0.022         | 1.130 | 0.009     | 0.069 |
| site @65 | APR-AGL | 0.285     | 0.046         | 1.257 | 0.018     | 0.113 |
| site @73 | APR-AGL | -0.052    | 0.060         | 1.208 | 0.021     | 0.169 |
| site @86 | APR-AGL | 0.351     | 0.030         | 1.182 | 0.012     | 0.109 |
| site @95 | APR-AGL | 0.354     | 0.021         | 1.187 | 0.008     | 0.071 |
| site @19 | CRP-ESD | 2.496     | 0.038         | 1.233 | 0.015     | 0.146 |
| site @52 | CRP-ESD | 5.494     | 0.062         | 0.920 | 0.024     | 0.218 |
| site @54 | CRP-ESD | 2.853     | 0.031         | 1.068 | 0.012     | 0.103 |
| site @56 | CRP-ESD | 2.643     | 0.033         | 1.196 | 0.013     | 0.120 |
| site @65 | CRP-ESD | 2.733     | 0.014         | 1.118 | 0.006     | 0.050 |
| site @73 | CRP-ESD | 2.690     | 0.046         | 1.038 | 0.018     | 0.125 |
| site @86 | CRP-ESD | 5.040     | 0.028         | 1.202 | 0.011     | 0.098 |
| site @95 | CRP-ESD | 2.558     | 0.061         | 1.218 | 0.025     | 0.149 |
| site @19 | CRP-GYS | 1.139     | 0.039         | 1.516 | 0.015     | 0.113 |
| site @52 | CRP-GYS | 1.933     | 0.030         | 1.321 | 0.012     | 0.103 |
| site @54 | CRP-GYS | 0.646     | 0.043         | 1.283 | 0.017     | 0.135 |
| site @56 | CRP-GYS | 1.027     | 0.036         | 1.437 | 0.014     | 0.121 |
| site @65 | CRP-GYS | 1.049     | 0.020         | 1.291 | 0.008     | 0.067 |
| site @73 | CRP-GYS | 0.645     | 0.048         | 1.297 | 0.019     | 0.159 |
| site @86 | CRP-GYS | 1.116     | 0.029         | 1.142 | 0.011     | 0.090 |
| site @95 | CRP-GYS | 0.935     | 0.018         | 1.301 | 0.007     | 0.064 |
| site @19 | HRP-SSD | -0.049    | 0.051         | 1.082 | 0.020     | 0.163 |
| site @52 | HRP-SSD | -0.060    | 0.029         | 1.294 | 0.011     | 0.101 |
| site @54 | HRP-SSD | 0.301     | 0.034         | 1.026 | 0.014     | 0.117 |
| site @56 | HRP-SSD | -0.067    | 0.024         | 1.194 | 0.009     | 0.085 |
| site @65 | HRP-SSD | -0.260    | 0.043         | 1.097 | 0.017     | 0.151 |
| site @73 | HRP-SSD | -0.027    | 0.054         | 1.248 | 0.021     | 0.171 |
| site @86 | HRP-SSD | 0.017     | 0.018         | 1.048 | 0.007     | 0.061 |
| site @95 | HRP-SSD | -0.163    | 0.039         | 1.593 | 0.016     | 0.131 |
| site @19 | LEP-IND | -0.073    | 0.072         | 1.211 | 0.029     | 0.261 |
| site @52 | LEP-IND | 0.041     | 0.079         | 1.136 | 0.032     | 0.180 |
| site @54 | LEP-IND | 0.052     | 0.037         | 1.110 | 0.015     | 0.125 |
| site @56 | LEP-IND | 0.038     | 0.024         | 1.199 | 0.009     | 0.070 |
| site @65 | LEP-IND | 0.222     | 0.027         | 1.287 | 0.011     | 0.093 |
| site @73 | LEP-IND | -0.119    | 0.048         | 1.089 | 0.019     | 0.162 |
| site @86 | LEP-IND | -0.036    | 0.111         | 0.968 | 0.044     | 0.389 |
| site @95 | LEP-IND | -0.156    | 0.026         | 1.304 | 0.010     | 0.079 |

**Study I Parameters**

| peptide | inter-lab | inter-lab   |
|---------|-----------|-------------|
|         | CV(slope) | Mean(slope) |
| APR-AGL | 10.2%     | 1.157       |
| CRP-ESD | 9.9%      | 1.124       |
| CRP-GYS | 8.5%      | 1.324       |
| HRP-SSD | 15.6%     | 1.198       |
| LEP-IND | 9.7%      | 1.163       |
| MBP-HGF | 8.6%      | 1.161       |
| MBP-YLA | 6.5%      | 1.275       |
| MYO-LFT | 16.5%     | 1.518       |
| PSA-IVG | 10.3%     | 1.658       |
| PSA-LSE | 8.6%      | 1.098       |

Intercept = y-intercept of linear regression

SE(intercept) = standard error of y-intercept

Slope = slope of linear regression

Sigma = standard deviation about regression line

for details see Methods Section

|          |         |        |       |       |       |       |
|----------|---------|--------|-------|-------|-------|-------|
| site @19 | MBP-HGF | 0.016  | 0.059 | 1.287 | 0.026 | 0.265 |
| site @52 | MBP-HGF | 0.146  | 0.014 | 1.024 | 0.006 | 0.070 |
| site @54 | MBP-HGF | 0.311  | 0.025 | 1.146 | 0.011 | 0.086 |
| site @56 | MBP-HGF | 0.253  | 0.025 | 1.255 | 0.011 | 0.094 |
| site @65 | MBP-HGF | 0.270  | 0.019 | 1.161 | 0.008 | 0.061 |
| site @73 | MBP-HGF | 0.054  | 0.034 | 1.257 | 0.014 | 0.140 |
| site @86 | MBP-HGF | 0.302  | 0.055 | 1.054 | 0.024 | 0.272 |
| site @95 | MBP-HGF | 0.071  | 0.019 | 1.100 | 0.009 | 0.074 |
| site @19 | MBP-YLA | 0.313  | 0.031 | 1.183 | 0.012 | 0.104 |
| site @52 | MBP-YLA | 0.156  | 0.033 | 1.252 | 0.013 | 0.094 |
| site @54 | MBP-YLA | 0.179  | 0.043 | 1.232 | 0.017 | 0.140 |
| site @56 | MBP-YLA | 0.145  | 0.040 | 1.418 | 0.016 | 0.136 |
| site @65 | MBP-YLA | -0.209 | 0.027 | 1.378 | 0.011 | 0.084 |
| site @73 | MBP-YLA | -0.173 | 0.064 | 1.267 | 0.023 | 0.202 |
| site @86 | MBP-YLA | 0.415  | 0.044 | 1.221 | 0.017 | 0.147 |
| site @95 | MBP-YLA | -0.101 | 0.032 | 1.248 | 0.013 | 0.118 |
| site @19 | MYO-LFT | -0.171 | 0.057 | 1.985 | 0.022 | 0.178 |
| site @52 | MYO-LFT | 0.203  | 0.026 | 1.671 | 0.010 | 0.091 |
| site @54 | MYO-LFT | 0.410  | 0.053 | 1.170 | 0.021 | 0.149 |
| site @56 | MYO-LFT | 0.273  | 0.020 | 1.445 | 0.008 | 0.068 |
| site @65 | MYO-LFT | 0.254  | 0.018 | 1.626 | 0.007 | 0.057 |
| site @73 | MYO-LFT | 0.072  | 0.057 | 1.438 | 0.023 | 0.209 |
| site @86 | MYO-LFT | 0.335  | 0.067 | 1.293 | 0.027 | 0.175 |
| site @95 | MYO-LFT | 0.107  | 0.024 | 1.513 | 0.010 | 0.090 |
| site @19 | PSA-IVG | 0.537  | 0.129 | 1.730 | 0.051 | 0.411 |
| site @52 | PSA-IVG | 0.554  | 0.087 | 1.537 | 0.034 | 0.254 |
| site @54 | PSA-IVG | 0.803  | 0.103 | 1.374 | 0.040 | 0.282 |
| site @56 | PSA-IVG | 0.344  | 0.053 | 1.816 | 0.021 | 0.182 |
| site @65 | PSA-IVG | 0.458  | 0.060 | 1.800 | 0.024 | 0.188 |
| site @73 | PSA-IVG | 0.311  | 0.045 | 1.721 | 0.018 | 0.153 |
| site @86 | PSA-IVG | 0.918  | 0.112 | 1.495 | 0.044 | 0.284 |
| site @95 | PSA-IVG | 0.443  | 0.051 | 1.795 | 0.020 | 0.180 |
| site @19 | PSA-LSE | 0.009  | 0.045 | 1.102 | 0.016 | 0.124 |
| site @52 | PSA-LSE | 0.312  | 0.033 | 1.219 | 0.012 | 0.100 |
| site @54 | PSA-LSE | 0.359  | 0.042 | 1.031 | 0.015 | 0.117 |
| site @56 | PSA-LSE | 0.514  | 0.027 | 1.053 | 0.010 | 0.082 |
| site @65 | PSA-LSE | -0.121 | 0.015 | 1.077 | 0.005 | 0.051 |
| site @73 | PSA-LSE | 0.137  | 0.050 | 1.182 | 0.018 | 0.144 |
| site @86 | PSA-LSE | 0.180  | 0.019 | 0.939 | 0.007 | 0.056 |
| site @95 | PSA-LSE | -0.117 | 0.045 | 1.178 | 0.016 | 0.128 |



**Supplementary Table 4B:** Linear regression-derived parameters: slope, CV(slope), and mean(slope) for Study II.

For Calibration Curve Plots (experimentally determined concentrations and theoretical/spiked-in concentration of signature peptides) see **Supplementary Figure 5**

### Study II Parameters

| Site     | Peptide | Intercept | SE(intercept) | Slope | SE(Slope) | Sigma |
|----------|---------|-----------|---------------|-------|-----------|-------|
| site @19 | APR-AGL | 0.261     | 0.027         | 0.673 | 0.010     | 0.083 |
| site @52 | APR-AGL | 0.634     | 0.013         | 0.519 | 0.005     | 0.042 |
| site @54 | APR-AGL | 0.675     | 0.018         | 0.453 | 0.006     | 0.051 |
| site @56 | APR-AGL | 0.364     | 0.018         | 0.542 | 0.007     | 0.054 |
| site @65 | APR-AGL | 0.186     | 0.034         | 0.637 | 0.012     | 0.088 |
| site @73 | APR-AGL | 0.098     | 0.011         | 0.549 | 0.004     | 0.032 |
| site @86 | APR-AGL | 0.317     | 0.017         | 0.621 | 0.006     | 0.055 |
| site @95 | APR-AGL | 0.211     | 0.016         | 0.603 | 0.006     | 0.051 |
| site @19 | CRP-ESD | 1.849     | 0.018         | 0.583 | 0.006     | 0.062 |
| site @52 | CRP-ESD | 5.669     | 0.058         | 0.449 | 0.020     | 0.181 |
| site @54 | CRP-ESD | 2.659     | 0.021         | 0.557 | 0.007     | 0.066 |
| site @56 | CRP-ESD | 3.395     | 0.018         | 0.573 | 0.006     | 0.047 |
| site @65 | CRP-ESD | 2.471     | 0.012         | 0.569 | 0.004     | 0.037 |
| site @73 | CRP-ESD | 2.680     | 0.019         | 0.516 | 0.007     | 0.060 |
| site @86 | CRP-ESD | 3.528     | 0.027         | 0.701 | 0.010     | 0.083 |
| site @95 | CRP-ESD | 2.551     | 0.035         | 0.633 | 0.013     | 0.087 |
| site @19 | CRP-GYS | 1.280     | 0.021         | 0.498 | 0.007     | 0.059 |
| site @52 | CRP-GYS | 1.451     | 0.015         | 0.580 | 0.005     | 0.049 |
| site @54 | CRP-GYS | 0.655     | 0.019         | 0.551 | 0.007     | 0.059 |
| site @56 | CRP-GYS | 0.747     | 0.011         | 0.511 | 0.004     | 0.031 |
| site @65 | CRP-GYS | 0.695     | 0.012         | 0.559 | 0.004     | 0.037 |
| site @73 | CRP-GYS | 0.799     | 0.024         | 0.657 | 0.008     | 0.074 |
| site @86 | CRP-GYS | 1.190     | 0.016         | 0.466 | 0.006     | 0.053 |
| site @95 | CRP-GYS | 1.125     | 0.011         | 0.545 | 0.004     | 0.033 |
| site @19 | HRP-SSD | -0.079    | 0.035         | 0.851 | 0.012     | 0.098 |
| site @52 | HRP-SSD | 0.181     | 0.023         | 0.873 | 0.008     | 0.072 |
| site @54 | HRP-SSD | 0.416     | 0.029         | 0.676 | 0.010     | 0.085 |
| site @56 | HRP-SSD | 0.061     | 0.021         | 0.785 | 0.008     | 0.057 |
| site @65 | HRP-SSD | 0.048     | 0.029         | 0.723 | 0.010     | 0.095 |
| site @73 | HRP-SSD | 0.100     | 0.036         | 0.828 | 0.013     | 0.113 |
| site @86 | HRP-SSD | 0.070     | 0.010         | 0.559 | 0.004     | 0.029 |
| site @95 | HRP-SSD | -0.159    | 0.031         | 1.058 | 0.011     | 0.084 |
| site @19 | LEP-IND | 0.025     | 0.009         | 0.146 | 0.003     | 0.025 |
| site @52 | LEP-IND | 0.036     | 0.014         | 0.152 | 0.005     | 0.033 |
| site @54 | LEP-IND | 0.060     | 0.005         | 0.150 | 0.002     | 0.015 |
| site @56 | LEP-IND | 0.035     | 0.011         | 0.156 | 0.004     | 0.035 |
| site @65 | LEP-IND | 0.002     | 0.008         | 0.166 | 0.003     | 0.023 |
| site @73 | LEP-IND | 0.047     | 0.012         | 0.166 | 0.004     | 0.038 |
| site @86 | LEP-IND | 0.009     | 0.023         | 0.113 | 0.008     | 0.065 |
| site @95 | LEP-IND | 0.032     | 0.005         | 0.167 | 0.002     | 0.015 |

### Study II Parameters

| peptide | inter-lab | inter-lab   |
|---------|-----------|-------------|
|         | CV(slope) | Mean(slope) |
| APR-AGL | 12.6%     | 0.575       |
| CRP-ESD | 13.2%     | 0.573       |
| CRP-GYS | 10.7%     | 0.546       |
| HRP-SSD | 18.7%     | 0.794       |
| LEP-IND | 12.0%     | 0.152       |
| MBP-HGF | 7.4%      | 0.758       |
| MBP-YLA | 6.2%      | 0.806       |
| MYO-LFT | 11.5%     | 1.012       |
| PSA-IVG | 9.9%      | 0.848       |
| PSA-LSE | 9.2%      | 1.524       |

Intercept = y-intercept of linear regression

SE(intercept) = standard error of y-intercept

Slope = slope of linear regression

Sigma = standard deviation about regression line

for details see Methods Section

|          |         |        |       |       |       |       |
|----------|---------|--------|-------|-------|-------|-------|
| site @19 | MBP-HGF | 0.122  | 0.045 | 0.764 | 0.016 | 0.172 |
| site @52 | MBP-HGF | 0.219  | 0.012 | 0.689 | 0.004 | 0.054 |
| site @54 | MBP-HGF | 0.047  | 0.019 | 0.781 | 0.007 | 0.056 |
| site @56 | MBP-HGF | 0.155  | 0.040 | 0.767 | 0.015 | 0.127 |
| site @65 | MBP-HGF | 0.192  | 0.015 | 0.786 | 0.005 | 0.041 |
| site @73 | MBP-HGF | 0.075  | 0.038 | 0.852 | 0.013 | 0.132 |
| site @86 | MBP-HGF | 0.047  | 0.093 | 0.687 | 0.034 | 0.278 |
| site @95 | MBP-HGF | 0.169  | 0.011 | 0.739 | 0.004 | 0.033 |
| site @19 | MBP-YLA | 0.033  | 0.029 | 0.860 | 0.010 | 0.087 |
| site @52 | MBP-YLA | 0.189  | 0.023 | 0.811 | 0.008 | 0.067 |
| site @54 | MBP-YLA | 0.122  | 0.030 | 0.791 | 0.011 | 0.083 |
| site @56 | MBP-YLA | 0.005  | 0.035 | 0.797 | 0.013 | 0.100 |
| site @65 | MBP-YLA | -0.314 | 0.032 | 0.875 | 0.011 | 0.093 |
| site @73 | MBP-YLA | 0.403  | 0.048 | 0.812 | 0.017 | 0.134 |
| site @86 | MBP-YLA | 0.063  | 0.086 | 0.722 | 0.031 | 0.247 |
| site @95 | MBP-YLA | -0.029 | 0.023 | 0.781 | 0.008 | 0.065 |
| site @19 | MYO-LFT | 0.140  | 0.029 | 0.995 | 0.010 | 0.087 |
| site @52 | MYO-LFT | 0.484  | 0.020 | 1.167 | 0.007 | 0.064 |
| site @54 | MYO-LFT | 0.353  | 0.043 | 0.824 | 0.015 | 0.117 |
| site @56 | MYO-LFT | 0.056  | 0.026 | 0.888 | 0.010 | 0.078 |
| site @65 | MYO-LFT | 0.123  | 0.027 | 1.141 | 0.010 | 0.083 |
| site @73 | MYO-LFT | 0.210  | 0.030 | 1.012 | 0.011 | 0.088 |
| site @86 | MYO-LFT | 0.099  | 0.102 | 1.012 | 0.036 | 0.304 |
| site @95 | MYO-LFT | 0.040  | 0.018 | 1.059 | 0.007 | 0.064 |
| site @19 | PSA-IVG | 0.437  | 0.050 | 0.820 | 0.018 | 0.142 |
| site @52 | PSA-IVG | 0.700  | 0.050 | 0.773 | 0.018 | 0.149 |
| site @54 | PSA-IVG | 0.803  | 0.058 | 0.718 | 0.021 | 0.130 |
| site @56 | PSA-IVG | 0.468  | 0.029 | 0.803 | 0.011 | 0.095 |
| site @65 | PSA-IVG | 0.290  | 0.035 | 0.888 | 0.012 | 0.103 |
| site @73 | PSA-IVG | 0.325  | 0.032 | 0.927 | 0.011 | 0.090 |
| site @86 | PSA-IVG | 0.684  | 0.068 | 0.956 | 0.025 | 0.194 |
| site @95 | PSA-IVG | 0.349  | 0.028 | 0.897 | 0.010 | 0.089 |
| site @19 | PSA-LSE | 0.017  | 0.066 | 1.423 | 0.024 | 0.195 |
| site @52 | PSA-LSE | 1.489  | 0.036 | 1.676 | 0.013 | 0.120 |
| site @54 | PSA-LSE | 0.156  | 0.056 | 1.559 | 0.020 | 0.166 |
| site @56 | PSA-LSE | 0.062  | 0.026 | 1.403 | 0.010 | 0.077 |
| site @65 | PSA-LSE | -0.253 | 0.033 | 1.566 | 0.012 | 0.094 |
| site @73 | PSA-LSE | 0.061  | 0.035 | 1.632 | 0.012 | 0.109 |
| site @86 | PSA-LSE | 0.174  | 0.023 | 1.286 | 0.008 | 0.068 |
| site @95 | PSA-LSE | -0.220 | 0.058 | 1.648 | 0.021 | 0.151 |

**Supplementary Table 4C:** Linear regression-derived parameters: slope, CV(slope), and mean(slope) for Study IIIa.

For Calibration Curve Plots (experimentally determined concentrations and theoretical/spiked-in concentration of signature peptides) see **Supplementary Figure 5**

#### Study IIIa Parameters

| Site     | Peptide | Intercept | SE(intercept) | Slope | SE(Slope) | Sigma |
|----------|---------|-----------|---------------|-------|-----------|-------|
| site @19 | APR-AGL | 0.179     | 0.058         | 0.907 | 0.020     | 0.152 |
| site @52 | APR-AGL | 0.394     | 0.021         | 0.583 | 0.007     | 0.066 |
| site @54 | APR-AGL | 0.239     | 0.003         | 0.005 | 0.001     | 0.009 |
| site @56 | APR-AGL | 0.302     | 0.025         | 0.668 | 0.008     | 0.060 |
| site @65 | APR-AGL | 0.774     | 0.057         | 0.786 | 0.019     | 0.149 |
| site @73 | APR-AGL | 0.129     | 0.034         | 0.522 | 0.011     | 0.094 |
| site @86 | APR-AGL | 0.412     | 0.034         | 0.896 | 0.012     | 0.096 |
| site @95 | APR-AGL | 0.171     | 0.020         | 0.859 | 0.007     | 0.061 |
| site @19 | CRP-ESD | 1.015     | 0.031         | 0.416 | 0.011     | 0.090 |
| site @52 | CRP-ESD | 2.812     | 0.029         | 0.350 | 0.010     | 0.101 |
| site @54 | CRP-ESD | 2.691     | 0.034         | 0.408 | 0.013     | 0.087 |
| site @56 | CRP-ESD | 3.663     | 0.028         | 0.445 | 0.010     | 0.091 |
| site @65 | CRP-ESD | 1.847     | 0.023         | 0.412 | 0.008     | 0.059 |
| site @73 | CRP-ESD | 1.169     | 0.026         | 0.321 | 0.009     | 0.078 |
| site @86 | CRP-ESD | 2.888     | 0.022         | 0.539 | 0.007     | 0.061 |
| site @95 | CRP-ESD | 2.368     | 0.026         | 0.565 | 0.009     | 0.076 |
| site @19 | CRP-GYS | 0.865     | 0.011         | 0.105 | 0.004     | 0.031 |
| site @52 | CRP-GYS | 3.177     | 0.008         | 0.107 | 0.003     | 0.030 |
| site @54 | CRP-GYS | 1.433     | 0.027         | 0.317 | 0.010     | 0.079 |
| site @56 | CRP-GYS | 1.132     | 0.006         | 0.127 | 0.002     | 0.016 |
| site @65 | CRP-GYS | 1.063     | 0.012         | 0.130 | 0.004     | 0.033 |
| site @73 | CRP-GYS | 0.335     | 0.008         | 0.097 | 0.003     | 0.023 |
| site @86 | CRP-GYS | 0.987     | 0.009         | 0.142 | 0.003     | 0.026 |
| site @95 | CRP-GYS | 1.047     | 0.009         | 0.226 | 0.003     | 0.027 |
| site @19 | HRP-SSD | 0.188     | 0.035         | 0.444 | 0.012     | 0.096 |
| site @52 | HRP-SSD | 0.109     | 0.018         | 0.437 | 0.006     | 0.049 |
| site @54 | HRP-SSD | 0.220     | 0.021         | 0.335 | 0.008     | 0.059 |
| site @56 | HRP-SSD | 0.094     | 0.018         | 0.446 | 0.006     | 0.049 |
| site @65 | HRP-SSD | 0.203     | 0.024         | 0.437 | 0.008     | 0.063 |
| site @73 | HRP-SSD | -0.112    | 0.029         | 0.374 | 0.009     | 0.086 |
| site @86 | HRP-SSD | 0.047     | 0.012         | 0.368 | 0.004     | 0.038 |
| site @95 | HRP-SSD | -0.193    | 0.019         | 0.582 | 0.006     | 0.056 |
| site @19 | LEP-IND | 0.033     | 0.030         | 0.223 | 0.009     | 0.084 |
| site @52 | LEP-IND | 0.012     | 0.011         | 0.252 | 0.004     | 0.037 |
| site @54 | LEP-IND | 0.067     | 0.022         | 0.239 | 0.008     | 0.051 |
| site @56 | LEP-IND | 0.014     | 0.077         | 0.264 | 0.027     | 0.186 |
| site @65 | LEP-IND | 0.137     | 0.024         | 0.253 | 0.008     | 0.065 |
| site @73 | LEP-IND | -0.060    | 0.019         | 0.213 | 0.007     | 0.065 |
| site @86 | LEP-IND | -0.002    | 0.016         | 0.200 | 0.005     | 0.030 |
| site @95 | LEP-IND | -0.187    | 0.013         | 0.286 | 0.004     | 0.035 |

#### Study IIIa Parameters

| peptide | inter-lab | inter-lab   |
|---------|-----------|-------------|
|         | CV(slope) | Mean(slope) |
| APR-AGL | 45.8%     | 0.653       |
| CRP-ESD | 19.6%     | 0.432       |
| CRP-GYS | 49.1%     | 0.156       |
| HRP-SSD | 17.6%     | 0.428       |
| LEP-IND | 12.7%     | 0.241       |
| MBP-HGF | 8.5%      | 0.231       |
| MBP-YLA | 154.5%    | 0.005       |
| MYO-LFT | 14.7%     | 0.517       |
| PSA-IVG | 28.6%     | 0.579       |
| PSA-LSE | 8.0%      | 0.879       |

Intercept = y-intercept of linear regression

SE(intercept) = standard error of y-intercept

Slope = slope of linear regression

Sigma = standard deviation about regression line

for details see Methods Section

## Supplement Page 97

|          |         |        |       |       |       |       |
|----------|---------|--------|-------|-------|-------|-------|
| site @19 | MBP-HGF | 0.032  | 0.038 | 0.230 | 0.011 | 0.109 |
| site @52 | MBP-HGF | 0.028  | 0.007 | 0.207 | 0.002 | 0.026 |
| site @54 | MBP-HGF | -0.027 | 0.011 | 0.259 | 0.004 | 0.031 |
| site @56 | MBP-HGF | 0.035  | 0.029 | 0.234 | 0.010 | 0.079 |
| site @65 | MBP-HGF | 0.220  | 0.016 | 0.240 | 0.006 | 0.045 |
| site @73 | MBP-HGF | 0.014  | 0.031 | 0.211 | 0.010 | 0.083 |
| site @86 | MBP-HGF | 0.004  | 0.011 | 0.216 | 0.004 | 0.028 |
| site @95 | MBP-HGF | -0.074 | 0.009 | 0.248 | 0.003 | 0.028 |
| site @19 | MBP-YLA | 0.171  | 0.005 | 0.002 | 0.002 | 0.010 |
| site @52 | MBP-YLA | 0.024  | 0.001 | 0.001 | 0.000 | 0.003 |
| site @54 | MBP-YLA | 0.628  | 0.004 | 0.000 | 0.002 | 0.018 |
| site @56 | MBP-YLA | 0.025  | 0.000 | 0.001 | 0.000 | 0.001 |
| site @65 | MBP-YLA | -0.001 | 0.001 | 0.001 | 0.000 | 0.002 |
| site @73 | MBP-YLA | 0.043  | 0.007 | 0.011 | 0.002 | 0.018 |
| site @86 | MBP-YLA | 0.016  | 0.001 | 0.001 | 0.000 | 0.003 |
| site @95 | MBP-YLA | -0.017 | 0.017 | 0.018 | 0.005 | 0.046 |
| site @19 | MYO-LFT | 0.361  | 0.027 | 0.444 | 0.009 | 0.084 |
| site @52 | MYO-LFT | 0.655  | 0.029 | 0.648 | 0.010 | 0.079 |
| site @54 | MYO-LFT | 0.167  | 0.030 | 0.596 | 0.012 | 0.080 |
| site @56 | MYO-LFT | 0.339  | 0.048 | 0.474 | 0.017 | 0.142 |
| site @65 | MYO-LFT | 0.598  | 0.044 | 0.528 | 0.015 | 0.094 |
| site @73 | MYO-LFT | 0.088  | 0.031 | 0.474 | 0.010 | 0.084 |
| site @86 | MYO-LFT | 8.402  | 0.023 | 0.439 | 0.008 | 0.110 |
| site @95 | MYO-LFT | 0.279  | 0.064 | 0.536 | 0.022 | 0.224 |
| site @19 | PSA-IVG | 0.482  | 0.057 | 0.551 | 0.020 | 0.170 |
| site @52 | PSA-IVG | 0.400  | 0.030 | 0.556 | 0.010 | 0.098 |
| site @54 | PSA-IVG | 0.420  | 0.025 | 0.233 | 0.010 | 0.077 |
| site @56 | PSA-IVG | 0.489  | 0.037 | 0.609 | 0.013 | 0.107 |
| site @65 | PSA-IVG | 0.131  | 0.049 | 0.579 | 0.017 | 0.153 |
| site @73 | PSA-IVG | 0.201  | 0.043 | 0.611 | 0.014 | 0.125 |
| site @86 | PSA-IVG | 0.665  | 0.044 | 0.668 | 0.015 | 0.129 |
| site @95 | PSA-IVG | 0.133  | 0.037 | 0.825 | 0.012 | 0.106 |
| site @19 | PSA-LSE | 0.052  | 0.050 | 0.843 | 0.017 | 0.143 |
| site @52 | PSA-LSE | 0.932  | 0.024 | 0.904 | 0.008 | 0.082 |
| site @54 | PSA-LSE | 0.033  | 0.058 | 0.879 | 0.023 | 0.146 |
| site @56 | PSA-LSE | 0.105  | 0.019 | 0.804 | 0.007 | 0.054 |
| site @65 | PSA-LSE | 0.274  | 0.021 | 0.898 | 0.007 | 0.065 |
| site @73 | PSA-LSE | -0.374 | 0.054 | 0.807 | 0.019 | 0.164 |
| site @86 | PSA-LSE | 0.124  | 0.023 | 0.878 | 0.008 | 0.067 |
| site @95 | PSA-LSE | -0.270 | 0.043 | 1.020 | 0.015 | 0.122 |

**Supplementary Table 4D:** Linear regression-derived parameters: slope, CV(slope), and mean(slope) for Study IIIb.

For Calibration Curve Plots (experimentally determined concentrations and theoretical/spiked-in concentration of signature peptides) see **Supplementary Figure 5**

#### Study IIIb Parameters

| Site     | Peptide | Intercept | SE(intercept) | Slope | SE(Slope) | Sigma |
|----------|---------|-----------|---------------|-------|-----------|-------|
| site @19 | APR-AGL | 0.354     | 0.233         | 1.144 | 0.054     | 0.406 |
| site @52 | APR-AGL | 0.967     | 0.025         | 0.608 | 0.008     | 0.068 |
| site @54 | APR-AGL | 0.226     | 0.025         | 0.558 | 0.008     | 0.074 |
| site @56 | APR-AGL | 0.417     | 0.031         | 0.635 | 0.011     | 0.094 |
| site @65 | APR-AGL | 0.187     | 0.043         | 0.928 | 0.015     | 0.114 |
| site @73 | APR-AGL | 0.251     | 0.030         | 0.517 | 0.010     | 0.084 |
| site @86 | APR-AGL | 0.684     | 0.037         | 0.904 | 0.013     | 0.102 |
| site @95 | APR-AGL | 0.340     | 0.030         | 0.787 | 0.010     | 0.091 |
| site @19 | CRP-ESD | 1.939     | 0.032         | 0.395 | 0.011     | 0.096 |
| site @52 | CRP-ESD | 2.804     | 0.030         | 0.422 | 0.010     | 0.090 |
| site @54 | CRP-ESD | 2.457     | 0.013         | 0.405 | 0.004     | 0.041 |
| site @56 | CRP-ESD | 2.341     | 0.028         | 0.425 | 0.010     | 0.080 |
| site @65 | CRP-ESD | 2.038     | 0.012         | 0.476 | 0.004     | 0.033 |
| site @73 | CRP-ESD | 1.362     | 0.020         | 0.317 | 0.007     | 0.059 |
| site @86 | CRP-ESD | 3.893     | 0.035         | 0.607 | 0.011     | 0.089 |
| site @95 | CRP-ESD | 2.435     | 0.026         | 0.461 | 0.009     | 0.072 |
| site @19 | CRP-GYS | 0.864     | 0.026         | 0.217 | 0.009     | 0.074 |
| site @52 | CRP-GYS | 2.381     | 0.009         | 0.131 | 0.003     | 0.027 |
| site @54 | CRP-GYS | 1.199     | 0.009         | 0.176 | 0.003     | 0.026 |
| site @56 | CRP-GYS | 0.891     | 0.007         | 0.137 | 0.002     | 0.022 |
| site @65 | CRP-GYS | 0.736     | 0.010         | 0.145 | 0.003     | 0.027 |
| site @73 | CRP-GYS | 0.787     | 0.010         | 0.098 | 0.003     | 0.029 |
| site @86 | CRP-GYS | 1.183     | 0.015         | 0.186 | 0.005     | 0.049 |
| site @95 | CRP-GYS | 1.591     | 0.009         | 0.185 | 0.003     | 0.029 |
| site @19 | HRP-SSD | 0.884     | 0.126         | 0.275 | 0.022     | 0.167 |
| site @52 | HRP-SSD | 0.455     | 0.020         | 0.465 | 0.007     | 0.055 |
| site @54 | HRP-SSD | 0.100     | 0.024         | 0.371 | 0.008     | 0.070 |
| site @56 | HRP-SSD | 0.080     | 0.020         | 0.444 | 0.007     | 0.058 |
| site @65 | HRP-SSD | -0.050    | 0.024         | 0.497 | 0.008     | 0.072 |
| site @73 | HRP-SSD | 0.075     | 0.025         | 0.350 | 0.007     | 0.063 |
| site @86 | HRP-SSD | 0.027     | 0.027         | 0.487 | 0.010     | 0.080 |
| site @95 | HRP-SSD | 0.092     | 0.021         | 0.534 | 0.007     | 0.064 |
| site @19 | LEP-IND | 0.201     | 0.041         | 0.243 | 0.011     | 0.100 |
| site @52 | LEP-IND | 0.054     | 0.011         | 0.282 | 0.004     | 0.034 |
| site @54 | LEP-IND | 0.119     | 0.026         | 0.222 | 0.009     | 0.077 |
| site @56 | LEP-IND | 0.009     | 0.024         | 0.249 | 0.009     | 0.068 |
| site @65 | LEP-IND | 0.664     | 0.052         | 0.209 | 0.018     | 0.156 |
| site @73 | LEP-IND | 0.044     | 0.025         | 0.200 | 0.008     | 0.078 |
| site @86 | LEP-IND | -0.036    | 0.026         | 0.286 | 0.009     | 0.055 |
| site @95 | LEP-IND | -0.128    | 0.011         | 0.238 | 0.004     | 0.032 |

#### Study IIIb Parameters

| peptide | inter-lab<br>CV(slope) | inter-lab<br>Mean(slope) |
|---------|------------------------|--------------------------|
| APR-AGL | 29.0%                  | 0.760                    |
| CRP-ESD | 19.1%                  | 0.439                    |
| CRP-GYS | 24.2%                  | 0.159                    |
| HRP-SSD | 20.7%                  | 0.428                    |
| LEP-IND | 13.7%                  | 0.241                    |
| MBP-HGF | 9.3%                   | 0.233                    |
| MBP-YLA | 154.7%                 | 0.004                    |
| MYO-LFT | 16.2%                  | 0.458                    |
| PSA-IVG | 9.9%                   | 0.581                    |
| PSA-LSE | 11.3%                  | 0.938                    |

Intercept = y-intercept of linear regression

SE(intercept) = standard error of y-intercept

Slope = slope of linear regression

Sigma = standard deviation about regression line

for details see Methods Section

|          |         |        |       |       |       |       |
|----------|---------|--------|-------|-------|-------|-------|
| site @19 | MBP-HGF | 0.208  | 0.027 | 0.213 | 0.008 | 0.066 |
| site @52 | MBP-HGF | 0.035  | 0.007 | 0.238 | 0.002 | 0.030 |
| site @54 | MBP-HGF | 0.014  | 0.007 | 0.245 | 0.002 | 0.021 |
| site @56 | MBP-HGF | 0.062  | 0.015 | 0.205 | 0.005 | 0.043 |
| site @65 | MBP-HGF | -0.107 | 0.014 | 0.261 | 0.005 | 0.036 |
| site @73 | MBP-HGF | 0.041  | 0.028 | 0.223 | 0.008 | 0.079 |
| site @86 | MBP-HGF | -0.110 | 0.038 | 0.258 | 0.012 | 0.124 |
| site @95 | MBP-HGF | -0.111 | 0.008 | 0.223 | 0.003 | 0.022 |
| site @19 | MBP-YLA | 0.000  | 0.000 | 0.000 | 0.000 | 0.000 |
| site @52 | MBP-YLA | 0.017  | 0.011 | 0.019 | 0.004 | 0.032 |
| site @54 | MBP-YLA | 0.005  | 0.001 | 0.001 | 0.000 | 0.002 |
| site @56 | MBP-YLA | 0.009  | 0.001 | 0.001 | 0.000 | 0.001 |
| site @65 | MBP-YLA | -0.006 | 0.005 | 0.008 | 0.002 | 0.024 |
| site @73 | MBP-YLA | 0.809  | 0.010 | 0.005 | 0.003 | 0.032 |
| site @86 | MBP-YLA | 0.032  | 0.001 | 0.001 | 0.000 | 0.001 |
| site @95 | MBP-YLA | 0.007  | 0.000 | 0.000 | 0.000 | 0.000 |
| site @19 | MYO-LFT | 0.557  | 0.069 | 0.487 | 0.021 | 0.167 |
| site @52 | MYO-LFT | 2.758  | 0.025 | 0.563 | 0.009 | 0.078 |
| site @54 | MYO-LFT | 6.080  | 0.011 | 0.332 | 0.004 | 0.054 |
| site @56 | MYO-LFT | 0.209  | 0.035 | 0.501 | 0.012 | 0.107 |
| site @65 | MYO-LFT | 5.884  | 0.041 | 0.422 | 0.014 | 0.136 |
| site @73 | MYO-LFT | 0.348  | 0.041 | 0.397 | 0.014 | 0.125 |
| site @86 | MYO-LFT | 1.335  | 0.042 | 0.507 | 0.015 | 0.125 |
| site @95 | MYO-LFT | 0.458  | 0.056 | 0.458 | 0.019 | 0.179 |
| site @19 | PSA-IVG | 0.568  | 0.041 | 0.504 | 0.013 | 0.118 |
| site @52 | PSA-IVG | 0.348  | 0.028 | 0.583 | 0.009 | 0.081 |
| site @54 | PSA-IVG | 0.542  | 0.057 | 0.595 | 0.018 | 0.119 |
| site @56 | PSA-IVG | 0.485  | 0.042 | 0.565 | 0.015 | 0.112 |
| site @65 | PSA-IVG | -0.052 | 0.027 | 0.669 | 0.009 | 0.084 |
| site @73 | PSA-IVG | 0.500  | 0.037 | 0.505 | 0.012 | 0.107 |
| site @86 | PSA-IVG | 0.364  | 0.047 | 0.613 | 0.017 | 0.144 |
| site @95 | PSA-IVG | 0.276  | 0.022 | 0.615 | 0.008 | 0.070 |
| site @19 | PSA-LSE | 0.433  | 0.389 | 1.059 | 0.053 | 0.411 |
| site @52 | PSA-LSE | 0.143  | 0.032 | 1.000 | 0.011 | 0.100 |
| site @54 | PSA-LSE | 0.240  | 0.042 | 0.955 | 0.014 | 0.113 |
| site @56 | PSA-LSE | 0.175  | 0.030 | 0.818 | 0.010 | 0.095 |
| site @65 | PSA-LSE | -0.217 | 0.016 | 0.965 | 0.006 | 0.044 |
| site @73 | PSA-LSE | -0.102 | 0.046 | 0.746 | 0.015 | 0.123 |
| site @86 | PSA-LSE | -0.090 | 0.042 | 1.007 | 0.016 | 0.122 |
| site @95 | PSA-LSE | -0.452 | 0.050 | 0.954 | 0.017 | 0.138 |

**Supplementary Table 4E:** Linear regression-derived parameters: slope, CV(slope), and mean(slope) for Study IIIc.For Calibration Curve Plots (experimentally determined concentrations and theoretical/spiked-in concentration of signature peptides) see **Supplementary Figure 5****Study IIIc Parameters**

| Site     | Peptide | Intercept | SE(intercept) | Slope | SE(Slope) | Sigma |
|----------|---------|-----------|---------------|-------|-----------|-------|
| site @19 | APR-AGL | 1.979     | 0.334         | 0.980 | 0.087     | 0.490 |
| site @52 | APR-AGL | 0.588     | 0.029         | 0.697 | 0.010     | 0.088 |
| site @54 | APR-AGL | 0.196     | 0.023         | 0.634 | 0.008     | 0.066 |
| site @56 | APR-AGL | 0.317     | 0.029         | 0.725 | 0.010     | 0.080 |
| site @65 | APR-AGL | -0.024    | 0.056         | 0.978 | 0.019     | 0.189 |
| site @73 | APR-AGL | -0.012    | 0.045         | 0.610 | 0.014     | 0.117 |
| site @86 | APR-AGL | 0.399     | 0.049         | 0.936 | 0.017     | 0.137 |
| site @95 | APR-AGL | 0.367     | 0.030         | 0.835 | 0.010     | 0.086 |
| site @19 | CRP-ESD | -0.268    | 0.028         | 0.470 | 0.010     | 0.100 |
| site @52 | CRP-ESD | 3.744     | 0.049         | 0.406 | 0.017     | 0.148 |
| site @54 | CRP-ESD | 2.188     | 0.021         | 0.423 | 0.007     | 0.063 |
| site @56 | CRP-ESD | 2.373     | 0.014         | 0.439 | 0.005     | 0.035 |
| site @65 | CRP-ESD | 1.746     | 0.024         | 0.493 | 0.008     | 0.063 |
| site @73 | CRP-ESD | 1.032     | 0.038         | 0.289 | 0.012     | 0.110 |
| site @86 | CRP-ESD | 3.394     | 0.026         | 0.569 | 0.009     | 0.074 |
| site @95 | CRP-ESD | 2.800     | 0.025         | 0.480 | 0.008     | 0.066 |
| site @19 | CRP-GYS | 0.623     | 0.028         | 0.228 | 0.010     | 0.079 |
| site @52 | CRP-GYS | 3.839     | 0.010         | 0.131 | 0.003     | 0.033 |
| site @54 | CRP-GYS | 1.548     | 0.013         | 0.167 | 0.004     | 0.038 |
| site @56 | CRP-GYS | 0.747     | 0.005         | 0.144 | 0.002     | 0.015 |
| site @65 | CRP-GYS | 1.038     | 0.013         | 0.172 | 0.004     | 0.036 |
| site @73 | CRP-GYS | 0.461     | 0.017         | 0.099 | 0.005     | 0.047 |
| site @86 | CRP-GYS | 0.996     | 0.012         | 0.155 | 0.004     | 0.038 |
| site @95 | CRP-GYS | 1.586     | 0.009         | 0.200 | 0.003     | 0.028 |
| site @19 | HRP-SSD | 1.325     | 0.138         | 0.238 | 0.020     | 0.105 |
| site @52 | HRP-SSD | 0.150     | 0.018         | 0.535 | 0.006     | 0.058 |
| site @54 | HRP-SSD | -0.033    | 0.013         | 0.435 | 0.005     | 0.043 |
| site @56 | HRP-SSD | -0.014    | 0.012         | 0.456 | 0.004     | 0.033 |
| site @65 | HRP-SSD | -0.081    | 0.022         | 0.485 | 0.007     | 0.067 |
| site @73 | HRP-SSD | 0.131     | 0.048         | 0.382 | 0.014     | 0.114 |
| site @86 | HRP-SSD | 0.143     | 0.027         | 0.399 | 0.009     | 0.072 |
| site @95 | HRP-SSD | 0.372     | 0.020         | 0.543 | 0.007     | 0.067 |
| site @19 | LEP-IND | 0.111     | 0.041         | 0.288 | 0.013     | 0.103 |
| site @52 | LEP-IND | 0.010     | 0.010         | 0.286 | 0.003     | 0.030 |
| site @54 | LEP-IND | -0.053    | 0.077         | 0.215 | 0.010     | 0.086 |
| site @56 | LEP-IND | -0.049    | 0.029         | 0.265 | 0.010     | 0.092 |
| site @65 | LEP-IND | 0.150     | 0.048         | 0.204 | 0.016     | 0.146 |
| site @73 | LEP-IND | 0.334     | 0.024         | 0.192 | 0.008     | 0.061 |
| site @86 | LEP-IND | 0.079     | 0.009         | 0.259 | 0.003     | 0.027 |
| site @95 | LEP-IND | -0.138    | 0.009         | 0.238 | 0.003     | 0.026 |

**Study IIIc Parameters**

| peptide | inter-lab | inter-lab   |
|---------|-----------|-------------|
|         | CV(slope) | Mean(slope) |
| APR-AGL | 19.6%     | 0.799       |
| CRP-ESD | 18.3%     | 0.446       |
| CRP-GYS | 24.9%     | 0.162       |
| HRP-SSD | 22.8%     | 0.434       |
| LEP-IND | 15.7%     | 0.243       |
| MBP-HGF | 8.5%      | 0.249       |
| MBP-YLA | 230.7%    | 0.030       |
| MYO-LFT | 27.0%     | 0.536       |
| PSA-IVG | 9.4%      | 0.600       |
| PSA-LSE | 12.1%     | 0.938       |

Intercept = y-intercept of linear regression

SE(intercept) = standard error of y-intercept

Slope = slope of linear regression

Sigma = standard deviation about regression line

for details see Methods Section

## Supplement Page 101

|          |         |        |       |       |       |       |
|----------|---------|--------|-------|-------|-------|-------|
| site @19 | MBP-HGF | 0.471  | 0.035 | 0.249 | 0.012 | 0.125 |
| site @52 | MBP-HGF | 0.007  | 0.006 | 0.241 | 0.002 | 0.025 |
| site @54 | MBP-HGF | 0.114  | 0.050 | 0.266 | 0.012 | 0.083 |
| site @56 | MBP-HGF | 0.007  | 0.031 | 0.238 | 0.010 | 0.090 |
| site @65 | MBP-HGF | -0.107 | 0.012 | 0.279 | 0.004 | 0.033 |
| site @73 | MBP-HGF | 0.002  | 0.041 | 0.257 | 0.012 | 0.108 |
| site @86 | MBP-HGF | 0.042  | 0.014 | 0.242 | 0.005 | 0.040 |
| site @95 | MBP-HGF | 0.008  | 0.007 | 0.216 | 0.002 | 0.020 |
| site @19 | MBP-YLA | 8.381  | 0.352 | 0.119 | 0.128 | 0.694 |
| site @52 | MBP-YLA | 0.045  | 0.002 | 0.003 | 0.001 | 0.008 |
| site @54 | MBP-YLA | 7.486  | 0.106 | 0.098 | 0.036 | 0.412 |
| site @56 | MBP-YLA | 0.006  | 0.000 | 0.001 | 0.000 | 0.001 |
| site @65 | MBP-YLA | 0.000  | 0.000 | 0.000 | 0.000 | 0.000 |
| site @73 | MBP-YLA | 0.085  | 0.010 | 0.015 | 0.003 | 0.027 |
| site @86 | MBP-YLA | 0.009  | 0.000 | 0.000 | 0.000 | 0.000 |
| site @95 | MBP-YLA | 0.010  | 0.000 | 0.000 | 0.000 | 0.000 |
| site @19 | MYO-LFT | 0.615  | 0.081 | 0.571 | 0.027 | 0.217 |
| site @52 | MYO-LFT | 0.283  | 0.033 | 0.757 | 0.011 | 0.099 |
| site @54 | MYO-LFT | 0.185  | 0.034 | 0.484 | 0.012 | 0.094 |
| site @56 | MYO-LFT | 0.213  | 0.046 | 0.430 | 0.016 | 0.130 |
| site @65 | MYO-LFT | 0.187  | 0.068 | 0.595 | 0.023 | 0.195 |
| site @73 | MYO-LFT | 0.191  | 0.045 | 0.391 | 0.015 | 0.147 |
| site @86 | MYO-LFT | 0.308  | 0.045 | 0.696 | 0.015 | 0.107 |
| site @95 | MYO-LFT | 3.415  | 0.028 | 0.363 | 0.010 | 0.098 |
| site @19 | PSA-IVG | 0.545  | 0.054 | 0.538 | 0.019 | 0.143 |
| site @52 | PSA-IVG | 0.506  | 0.031 | 0.677 | 0.011 | 0.091 |
| site @54 | PSA-IVG | 0.517  | 0.067 | 0.538 | 0.022 | 0.143 |
| site @56 | PSA-IVG | 0.475  | 0.018 | 0.569 | 0.006 | 0.052 |
| site @65 | PSA-IVG | -0.149 | 0.060 | 0.646 | 0.021 | 0.162 |
| site @73 | PSA-IVG | 0.192  | 0.052 | 0.574 | 0.016 | 0.122 |
| site @86 | PSA-IVG | 0.508  | 0.044 | 0.602 | 0.015 | 0.131 |
| site @95 | PSA-IVG | 0.286  | 0.022 | 0.658 | 0.008 | 0.066 |
| site @19 | PSA-LSE | 2.146  | 0.214 | 0.802 | 0.065 | 0.384 |
| site @52 | PSA-LSE | 0.741  | 0.032 | 1.089 | 0.011 | 0.097 |
| site @54 | PSA-LSE | 0.014  | 0.029 | 0.894 | 0.010 | 0.087 |
| site @56 | PSA-LSE | -0.022 | 0.021 | 0.884 | 0.007 | 0.065 |
| site @65 | PSA-LSE | -0.276 | 0.023 | 1.096 | 0.008 | 0.066 |
| site @73 | PSA-LSE | -0.349 | 0.083 | 0.863 | 0.027 | 0.186 |
| site @86 | PSA-LSE | 0.043  | 0.028 | 0.872 | 0.009 | 0.072 |
| site @95 | PSA-LSE | -0.037 | 0.044 | 1.002 | 0.015 | 0.123 |



**Supplementary Figure 5:** Linear calibration curves of observed concentrations (y-axis) of the ten signature peptides and the theoretical/spiked-in concentration (x-axis) into solution (buffer or plasma matrix). These regression plots are on a linear / linear scale for all five Studies I, II, III a-c, and all ten peptides with three transitions each from all eight participating sites.

Each of the eight sites were assigned random numerical codes (19, 52, 54, 56, 65, 73, 86, 95) for anonymization purposes. Linear calibration curves are organized by signature peptide, then by experiment (Studies I, II, III a,b,c) and all eight sites are displayed on each page. Study number and anonymization code for each site are displayed right above the individual regression plot (i.e., “I site 19” etc.), as well as the derived protein 3-letter code, the first three amino acids of the peptide sequence (i.e., APR-AGL; for further details see SOP – Supplementary Methods online). Statistical Models for Prediction Curves are described in detail in the Methods section. The linear calibration curves show all three MRM transitions per individual peptide recorded in these studies in different colors. The three letter protein codes stand for APR (aprotinin), CRP (C-reactive protein), HRP (horseradish peroxidase), LEP (leptin), MBP (myelin basic protein), MYO (myoglobin), and PSA (prostate specific antigen). All theoretical/spiked-in concentrations are gravimetrically corrected (see Supplementary Tables 6 A-F).

For better visualization, study I plots are displayed with upper limits for x-axes of 550 fmol/ $\mu$ l and y-axes of 750 fmol/ $\mu$ l, while Studies II and III are displayed with upper limits for x-axes of 550 fmol/ $\mu$ l and y-axes of 600 fmol/ $\mu$ l. For these two plotting options x and y axes length are displayed on isometric scales, where the relation between physical distance on the device and distance in the data scale are forced to be the same for both axes. This ensures that for all main plots for Study I (550 x and 750 y) as well as for Studies II and III (550 x and 600 y), the diagonal is always displayed at 45 degrees, and slopes are directly comparable between all three studies.

Inset plots with an x-axis of 27 fmol/ $\mu$ l and a y-axis of 40 fmol/ $\mu$ l have been added into each plot for each study to better visualize the low end concentration points.

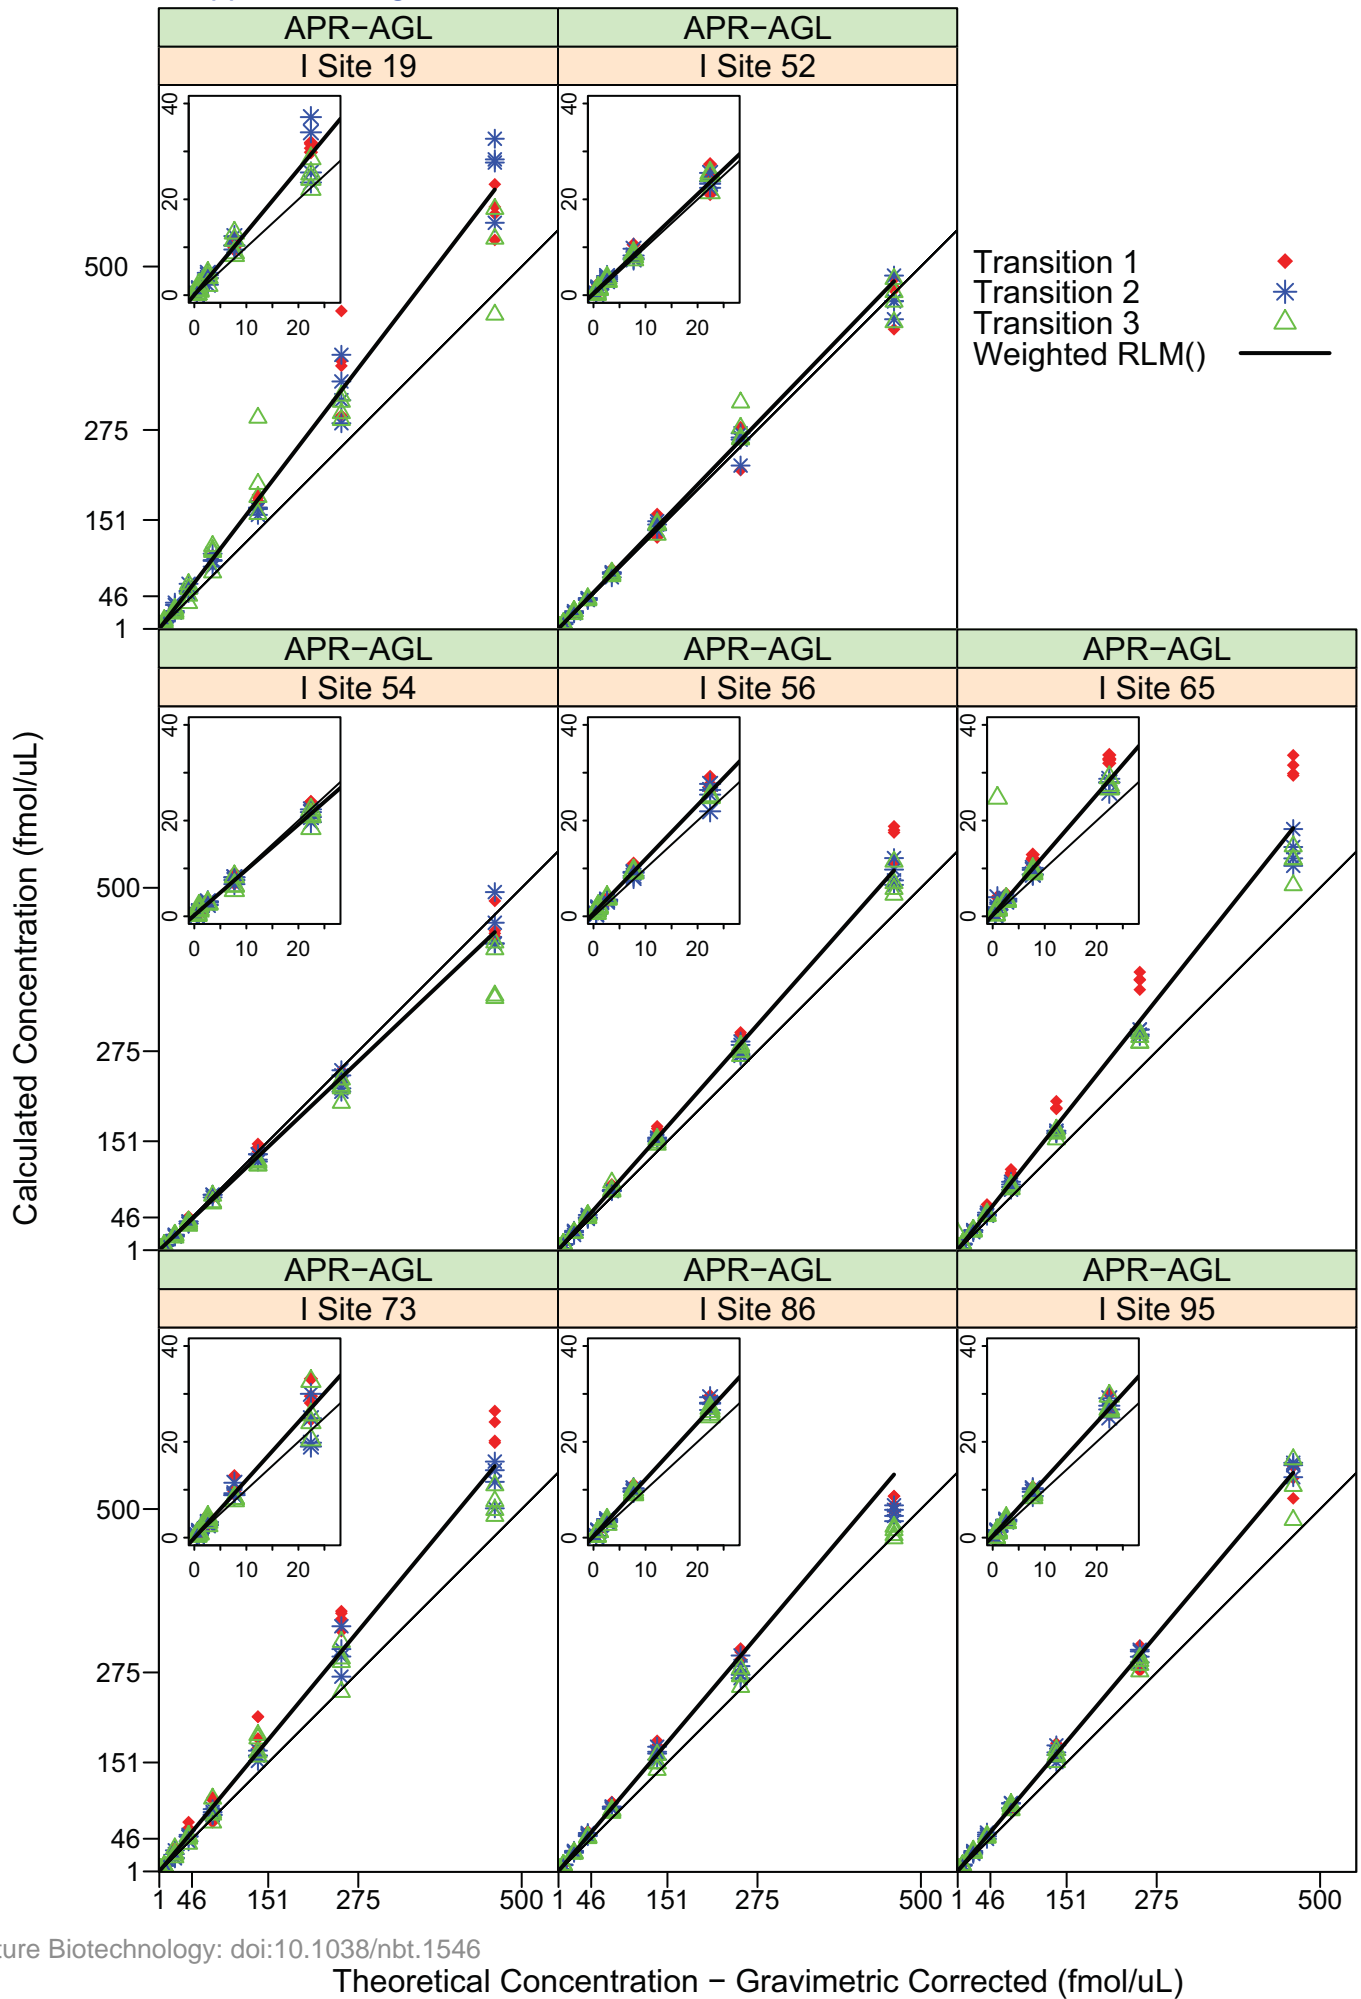

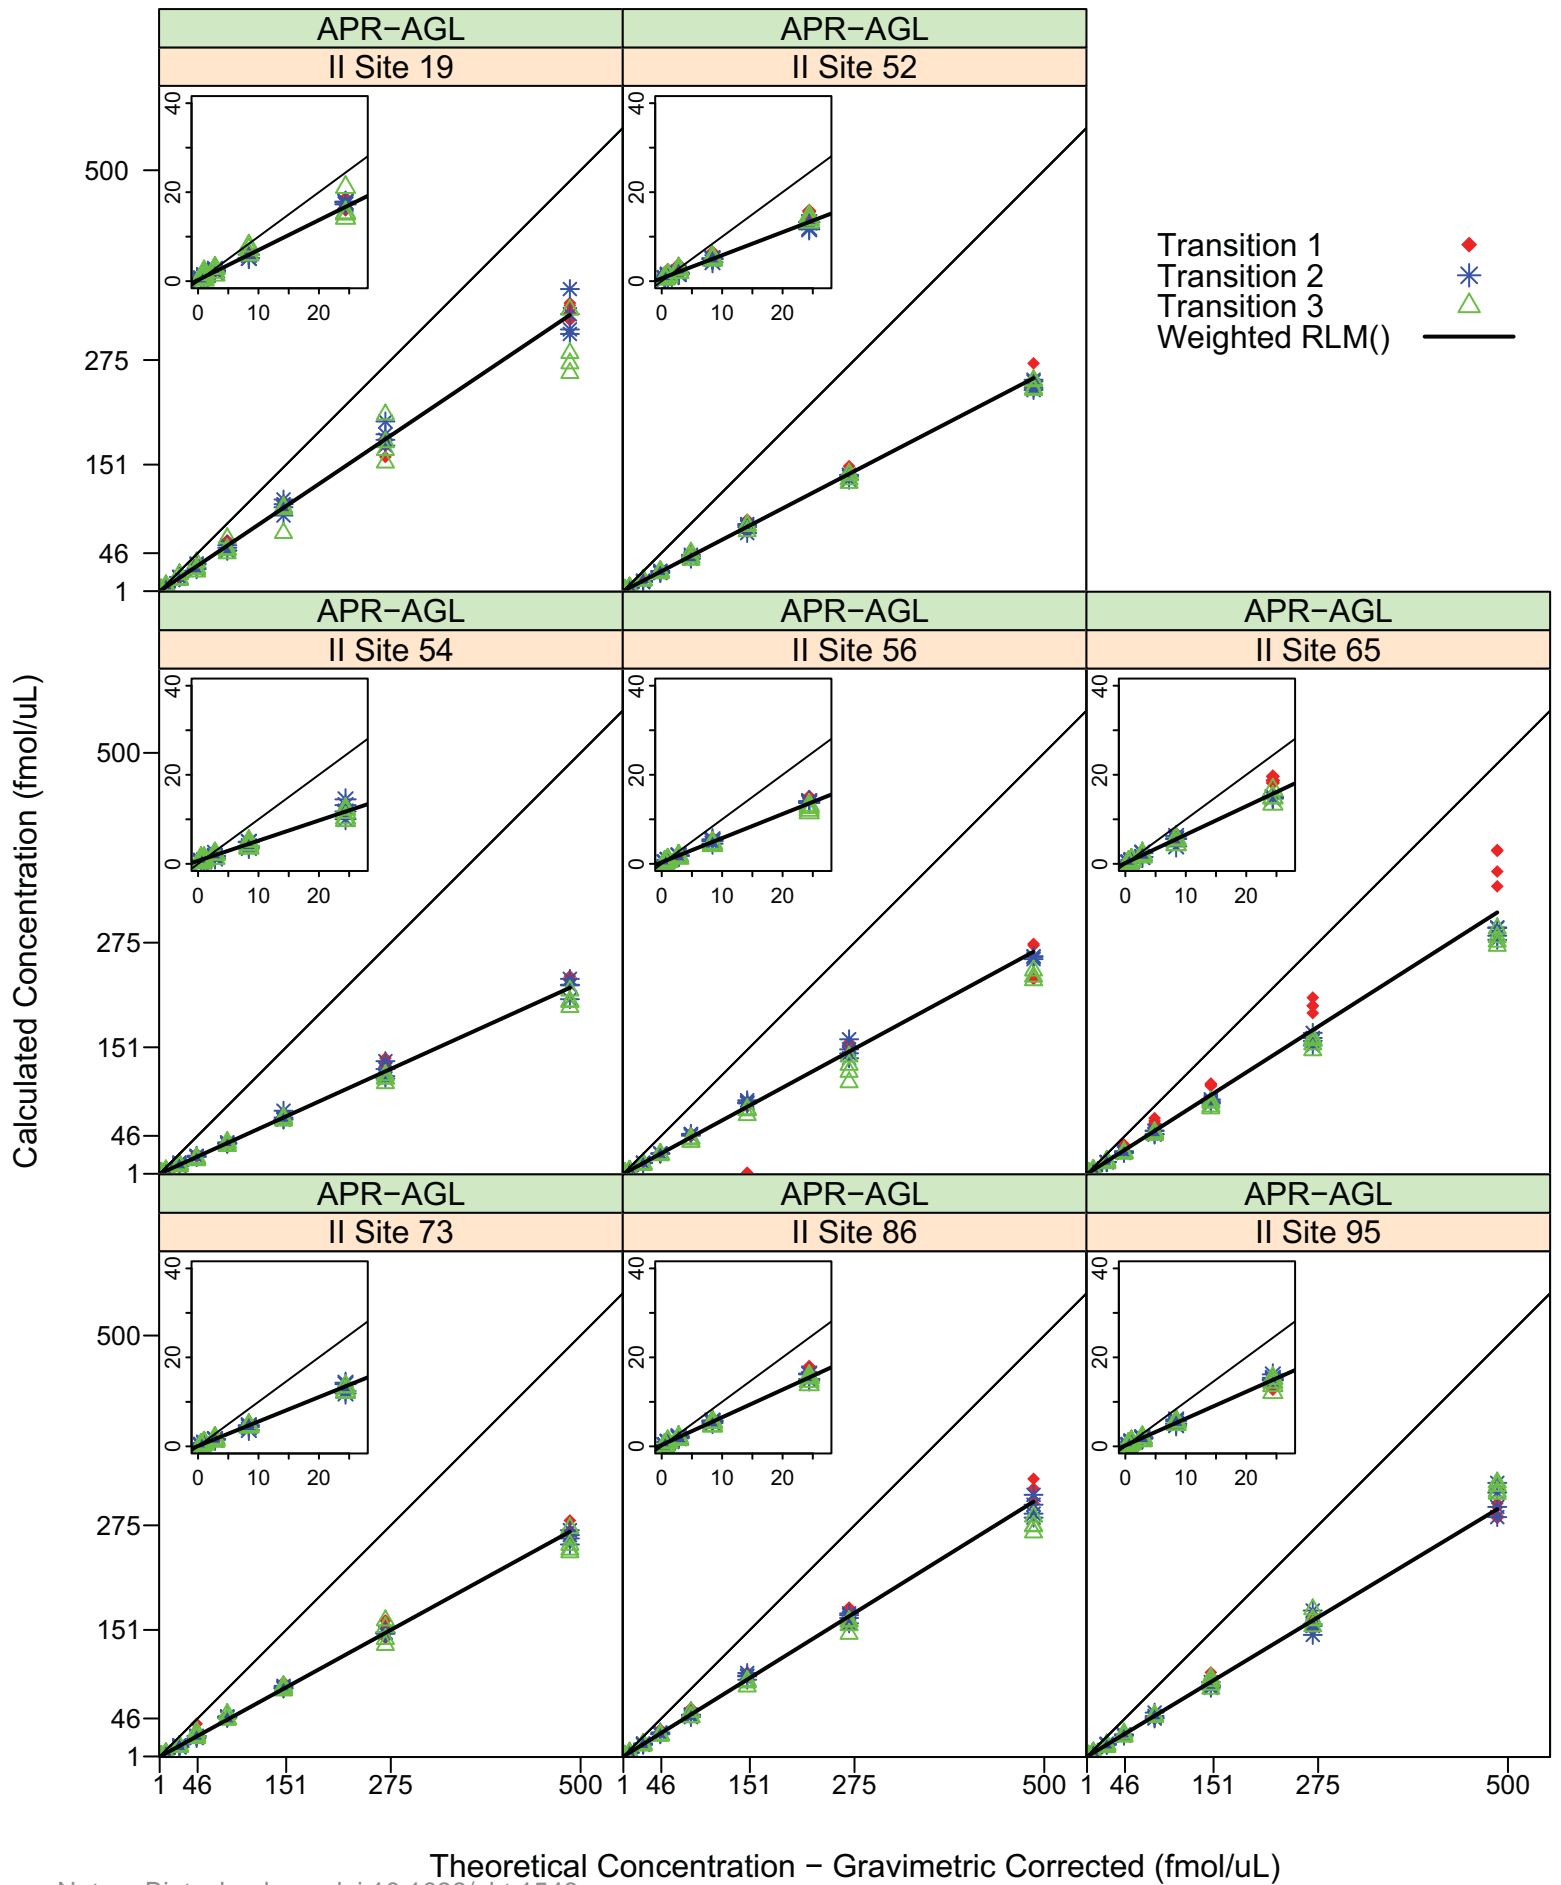

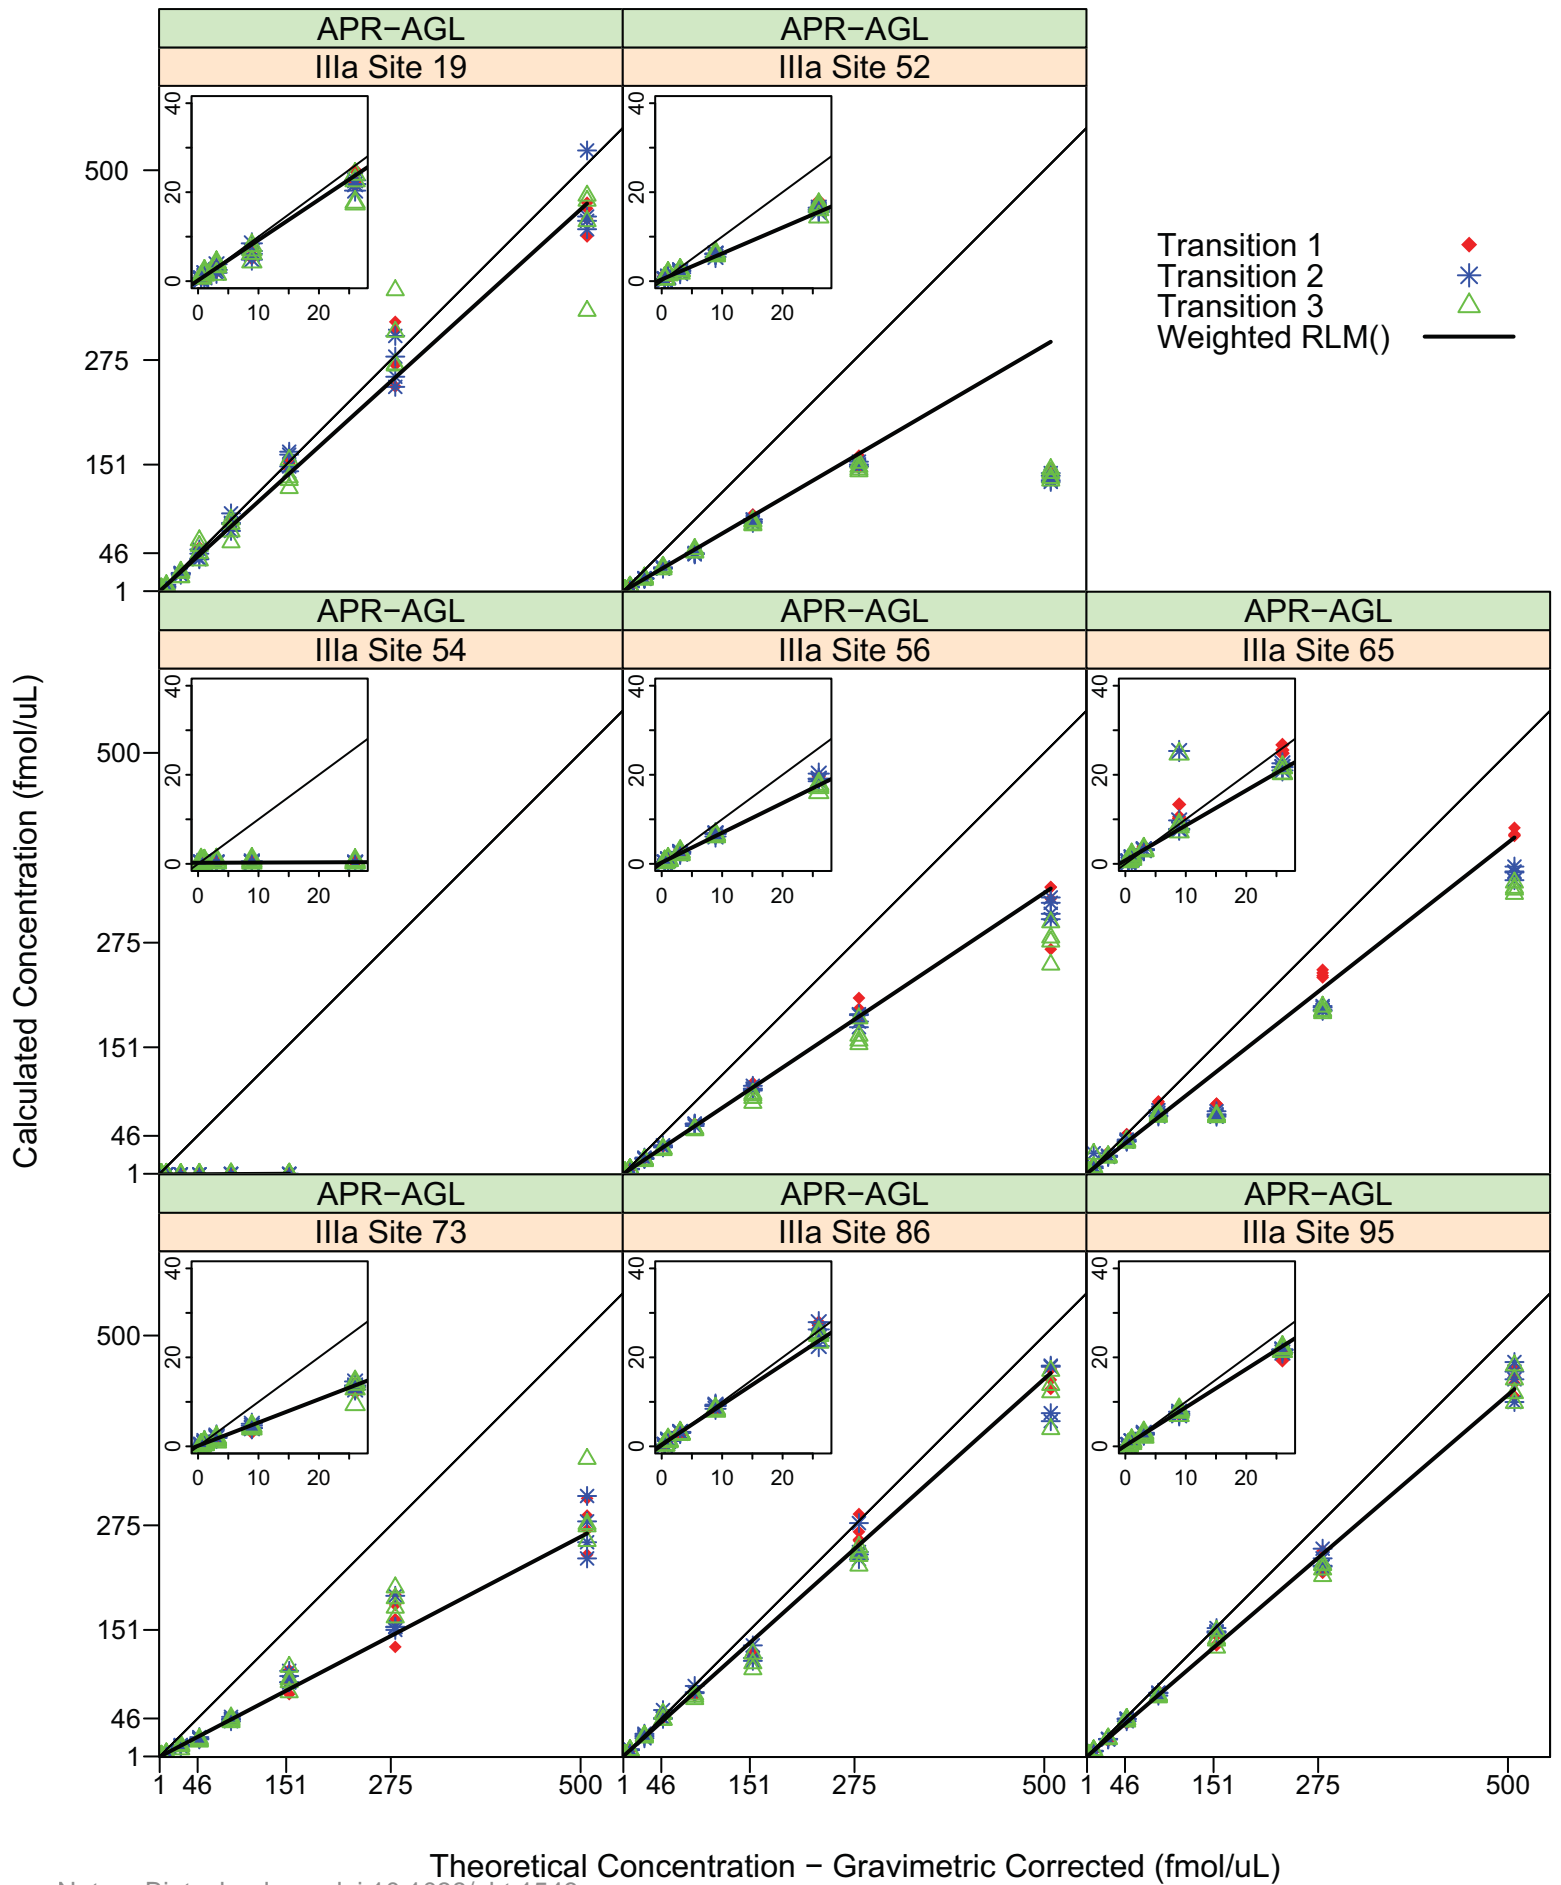

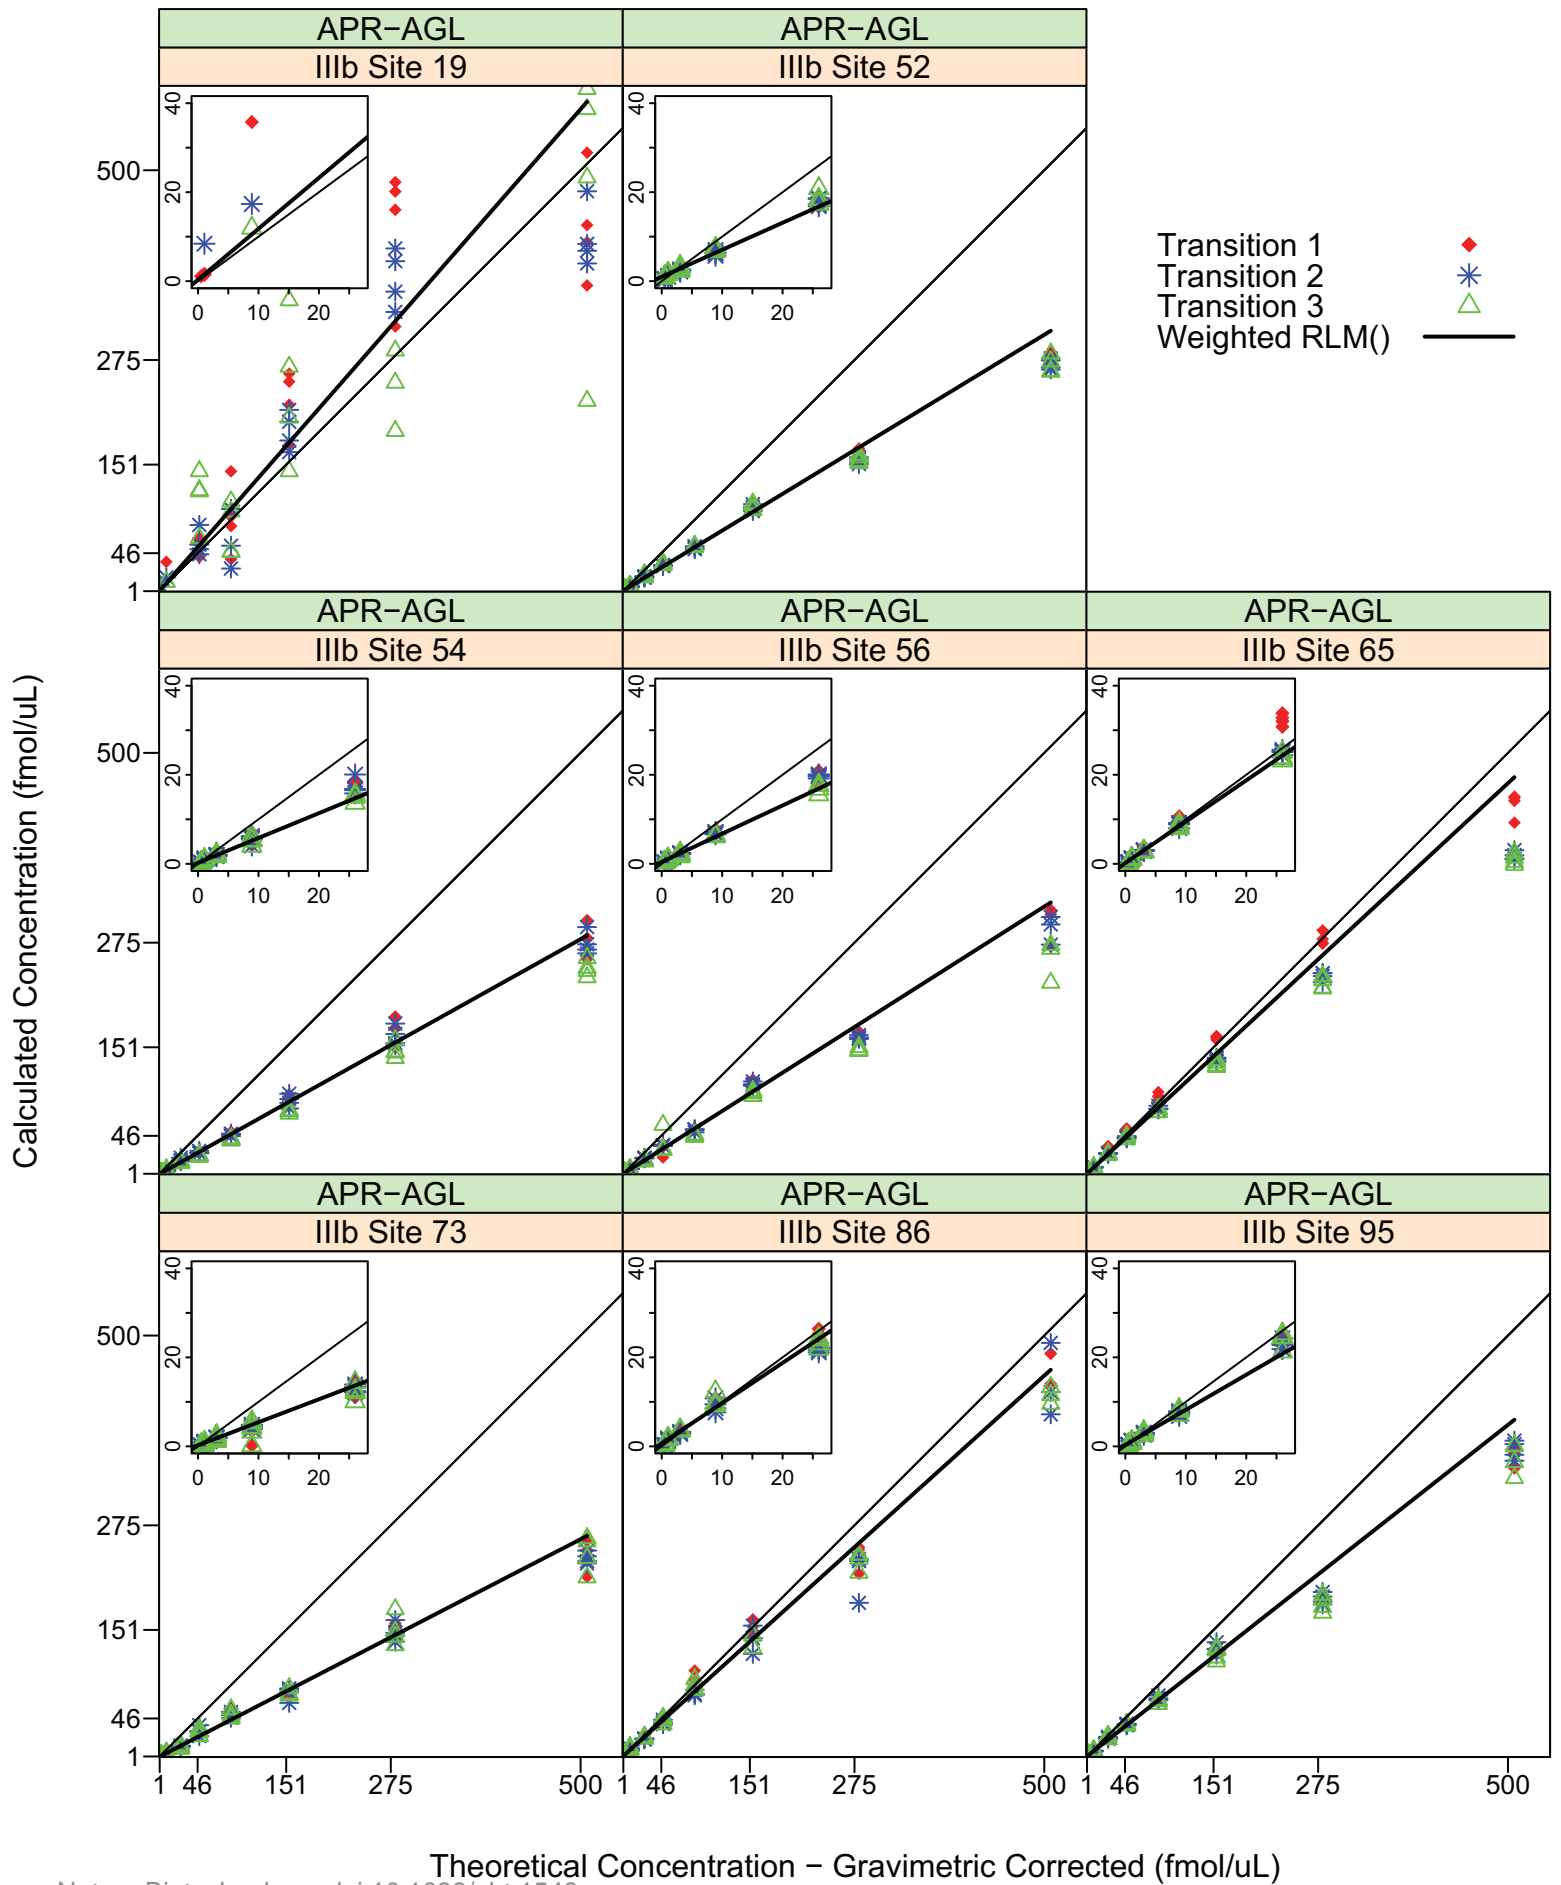

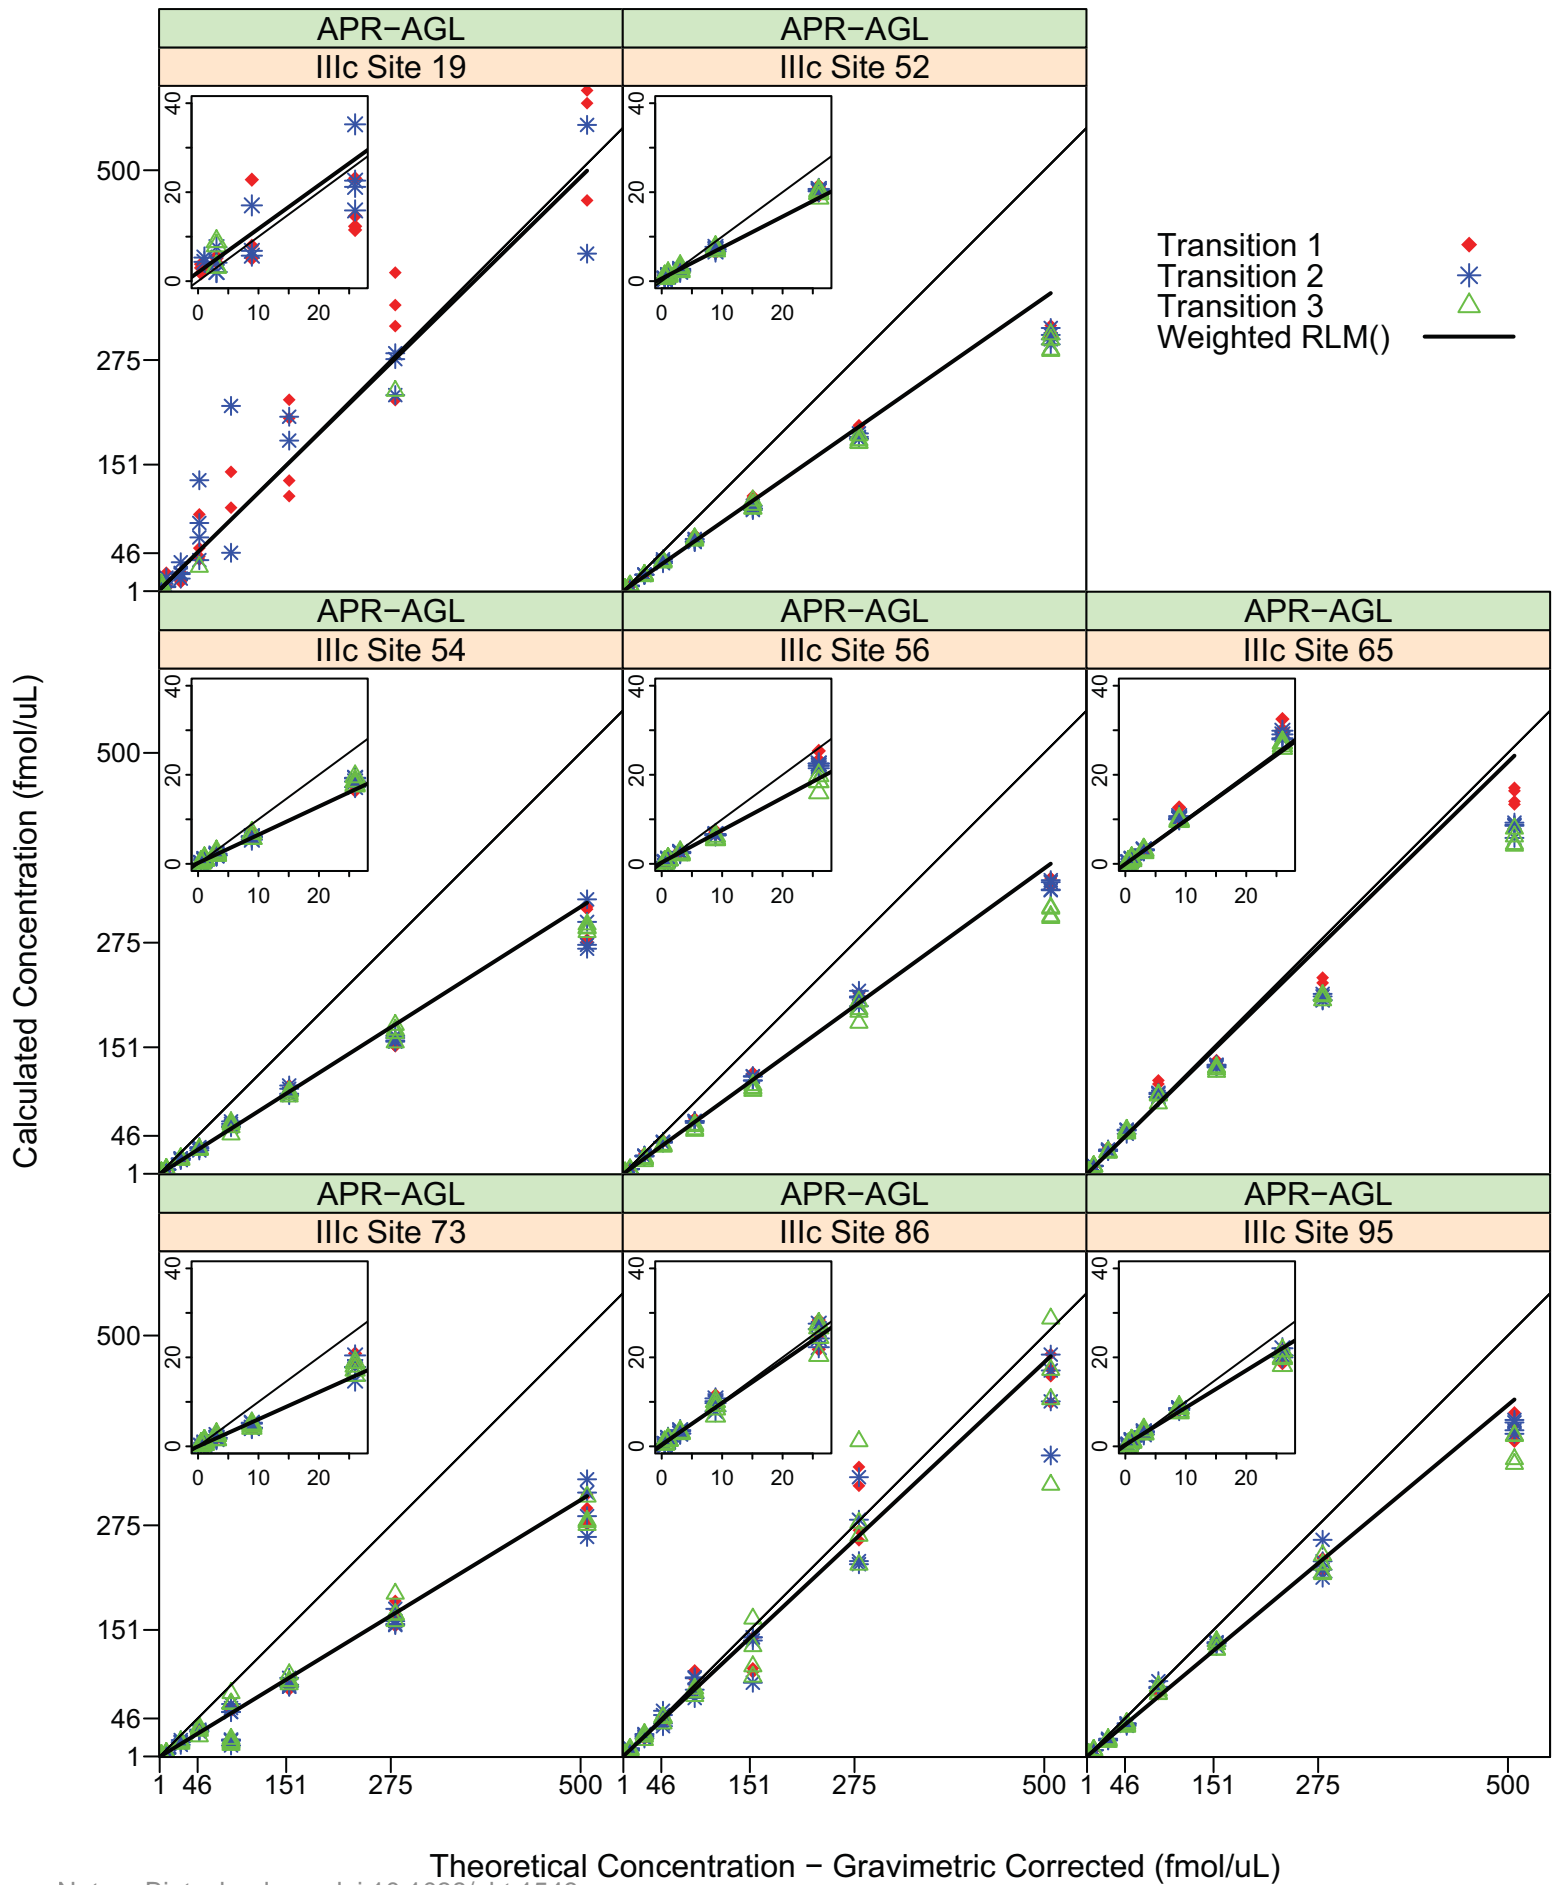

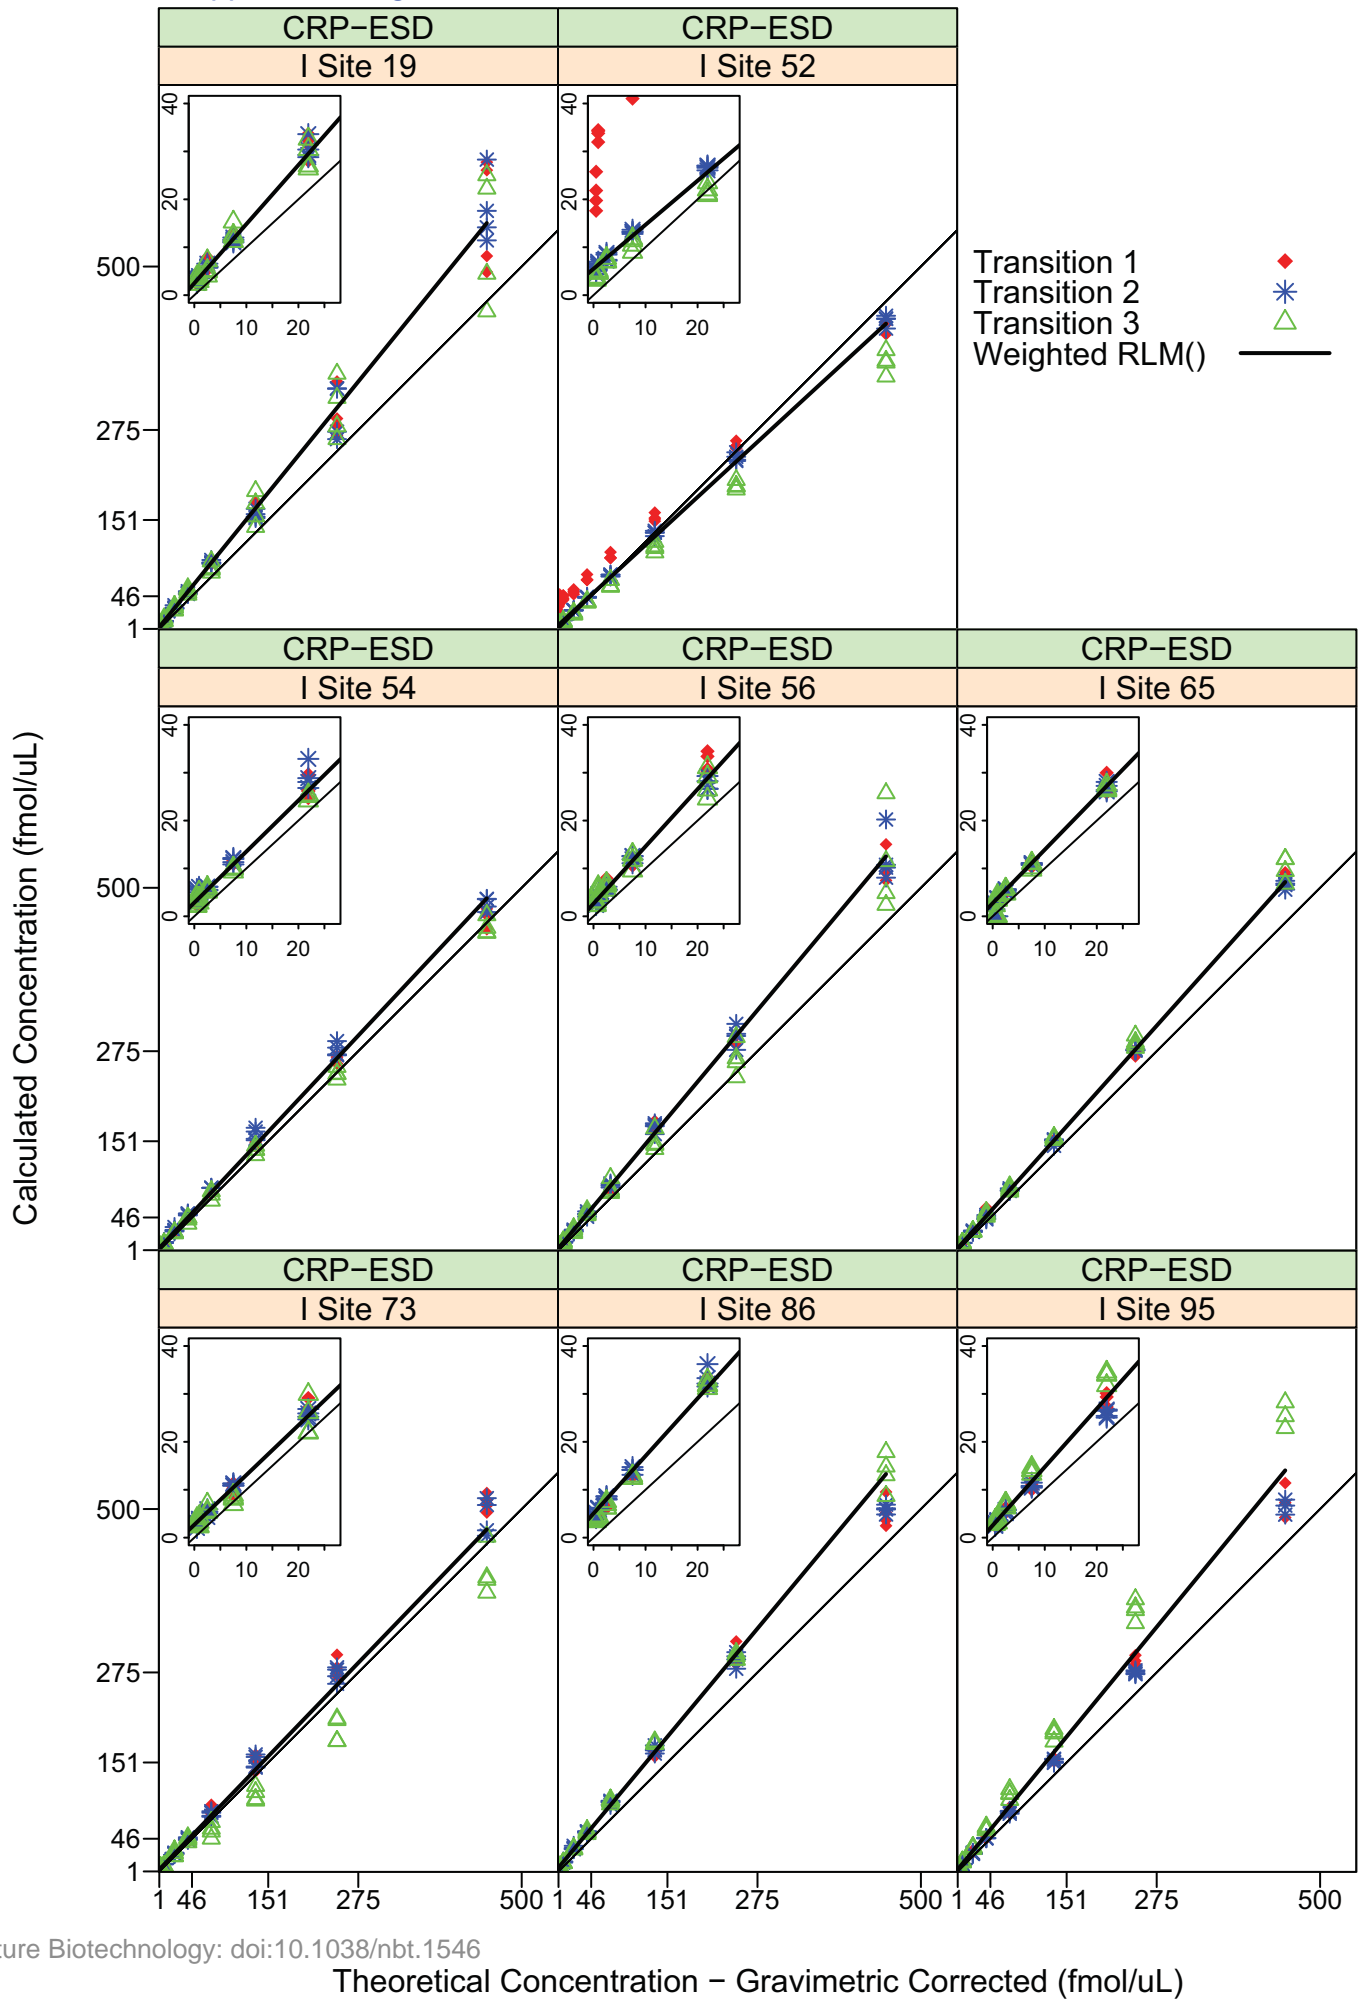

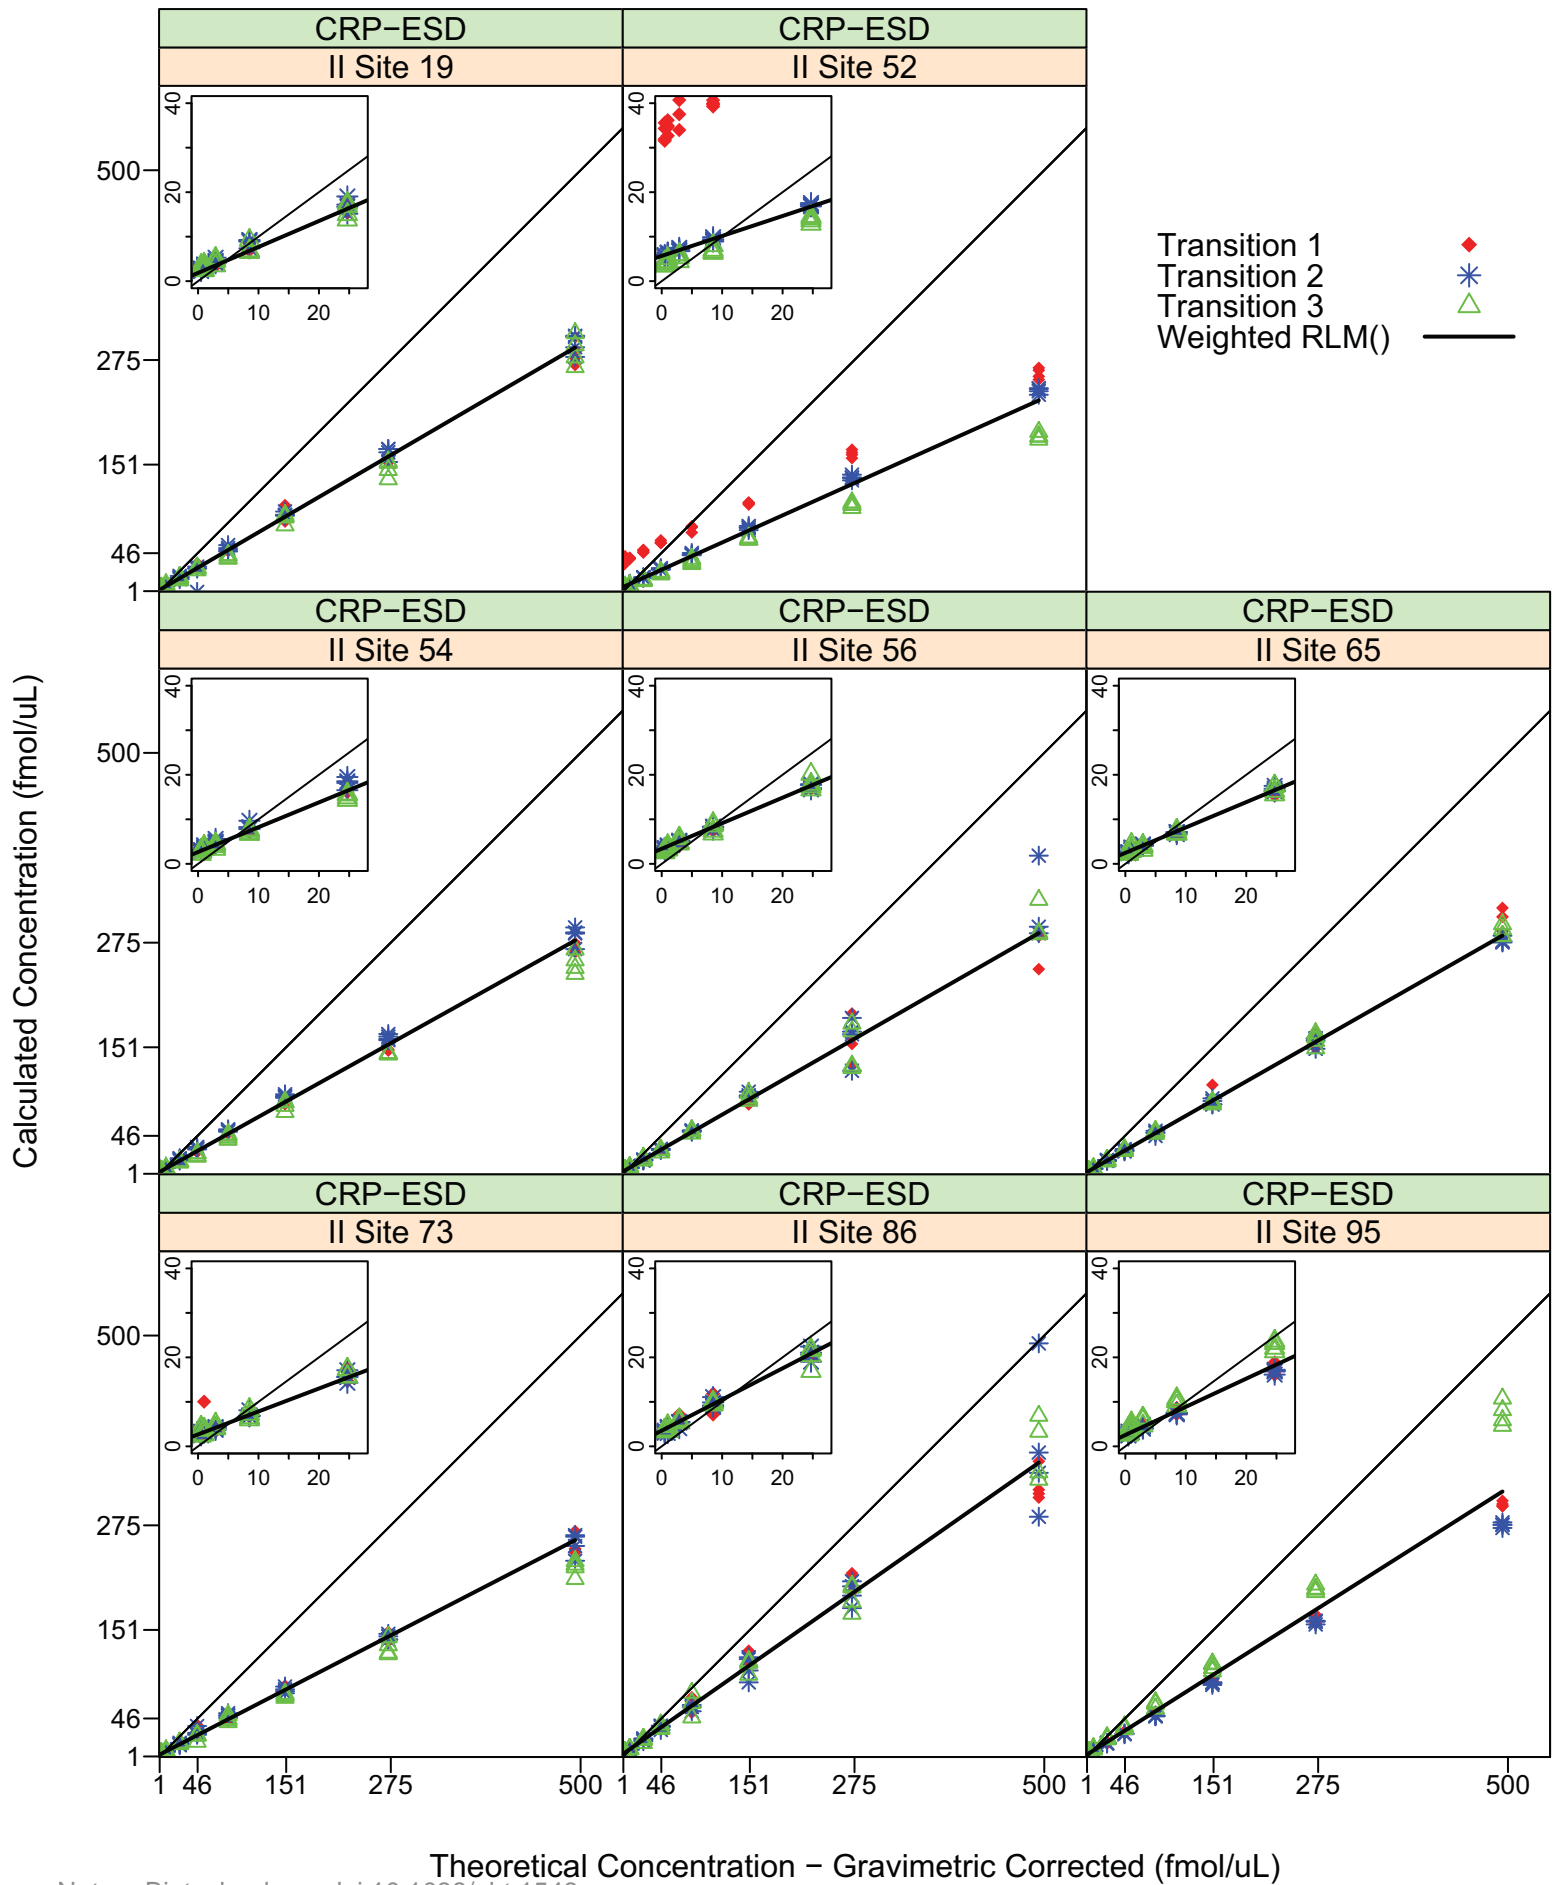



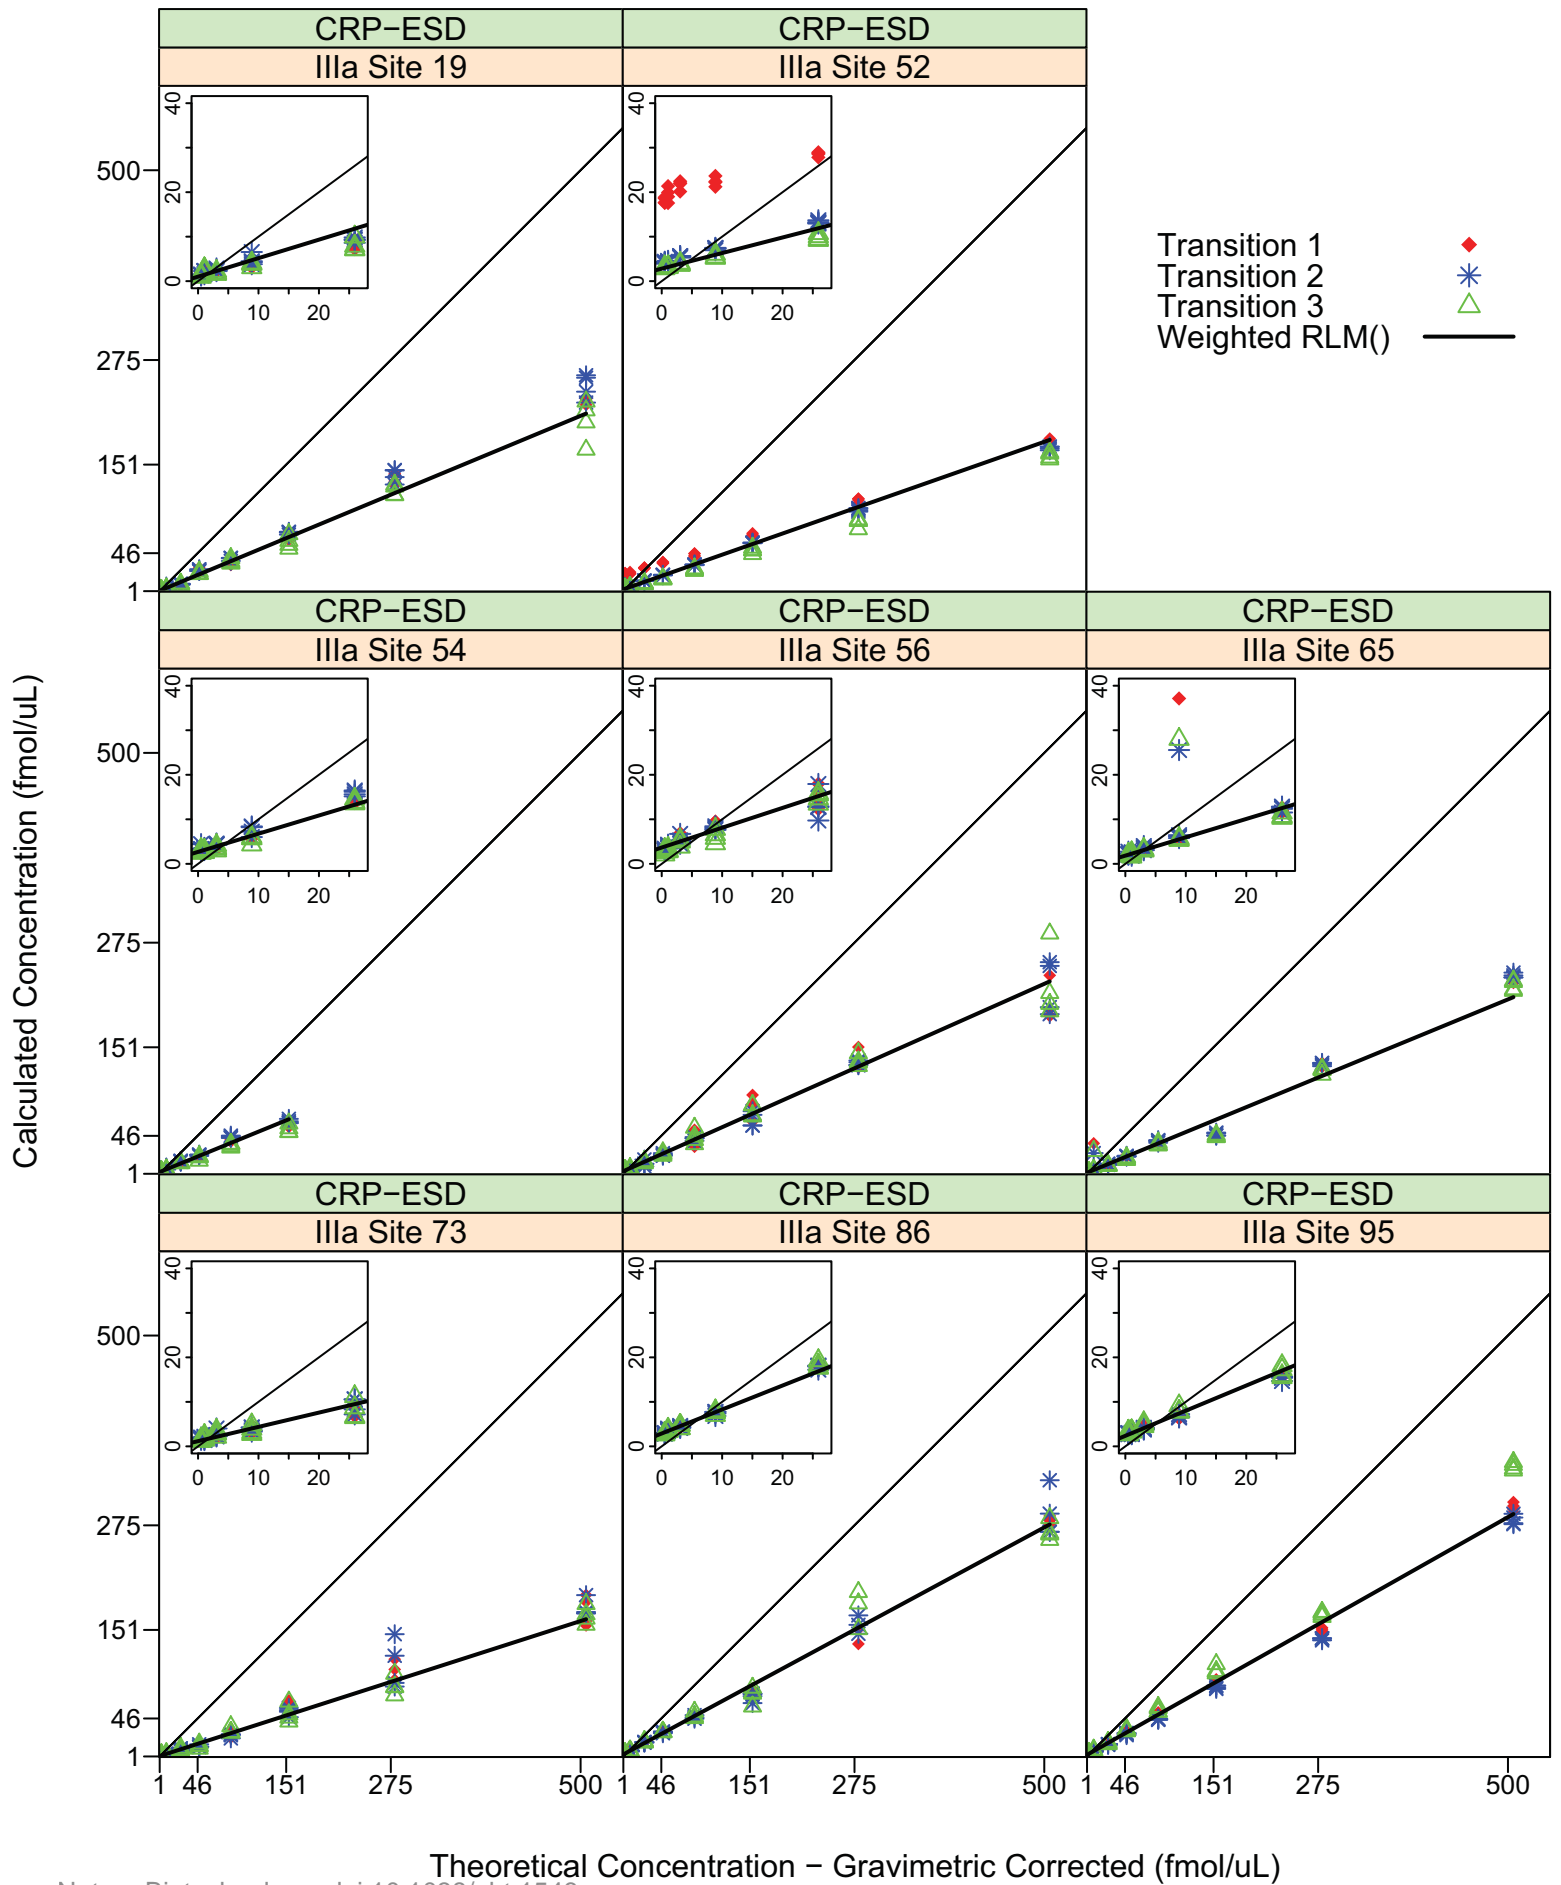

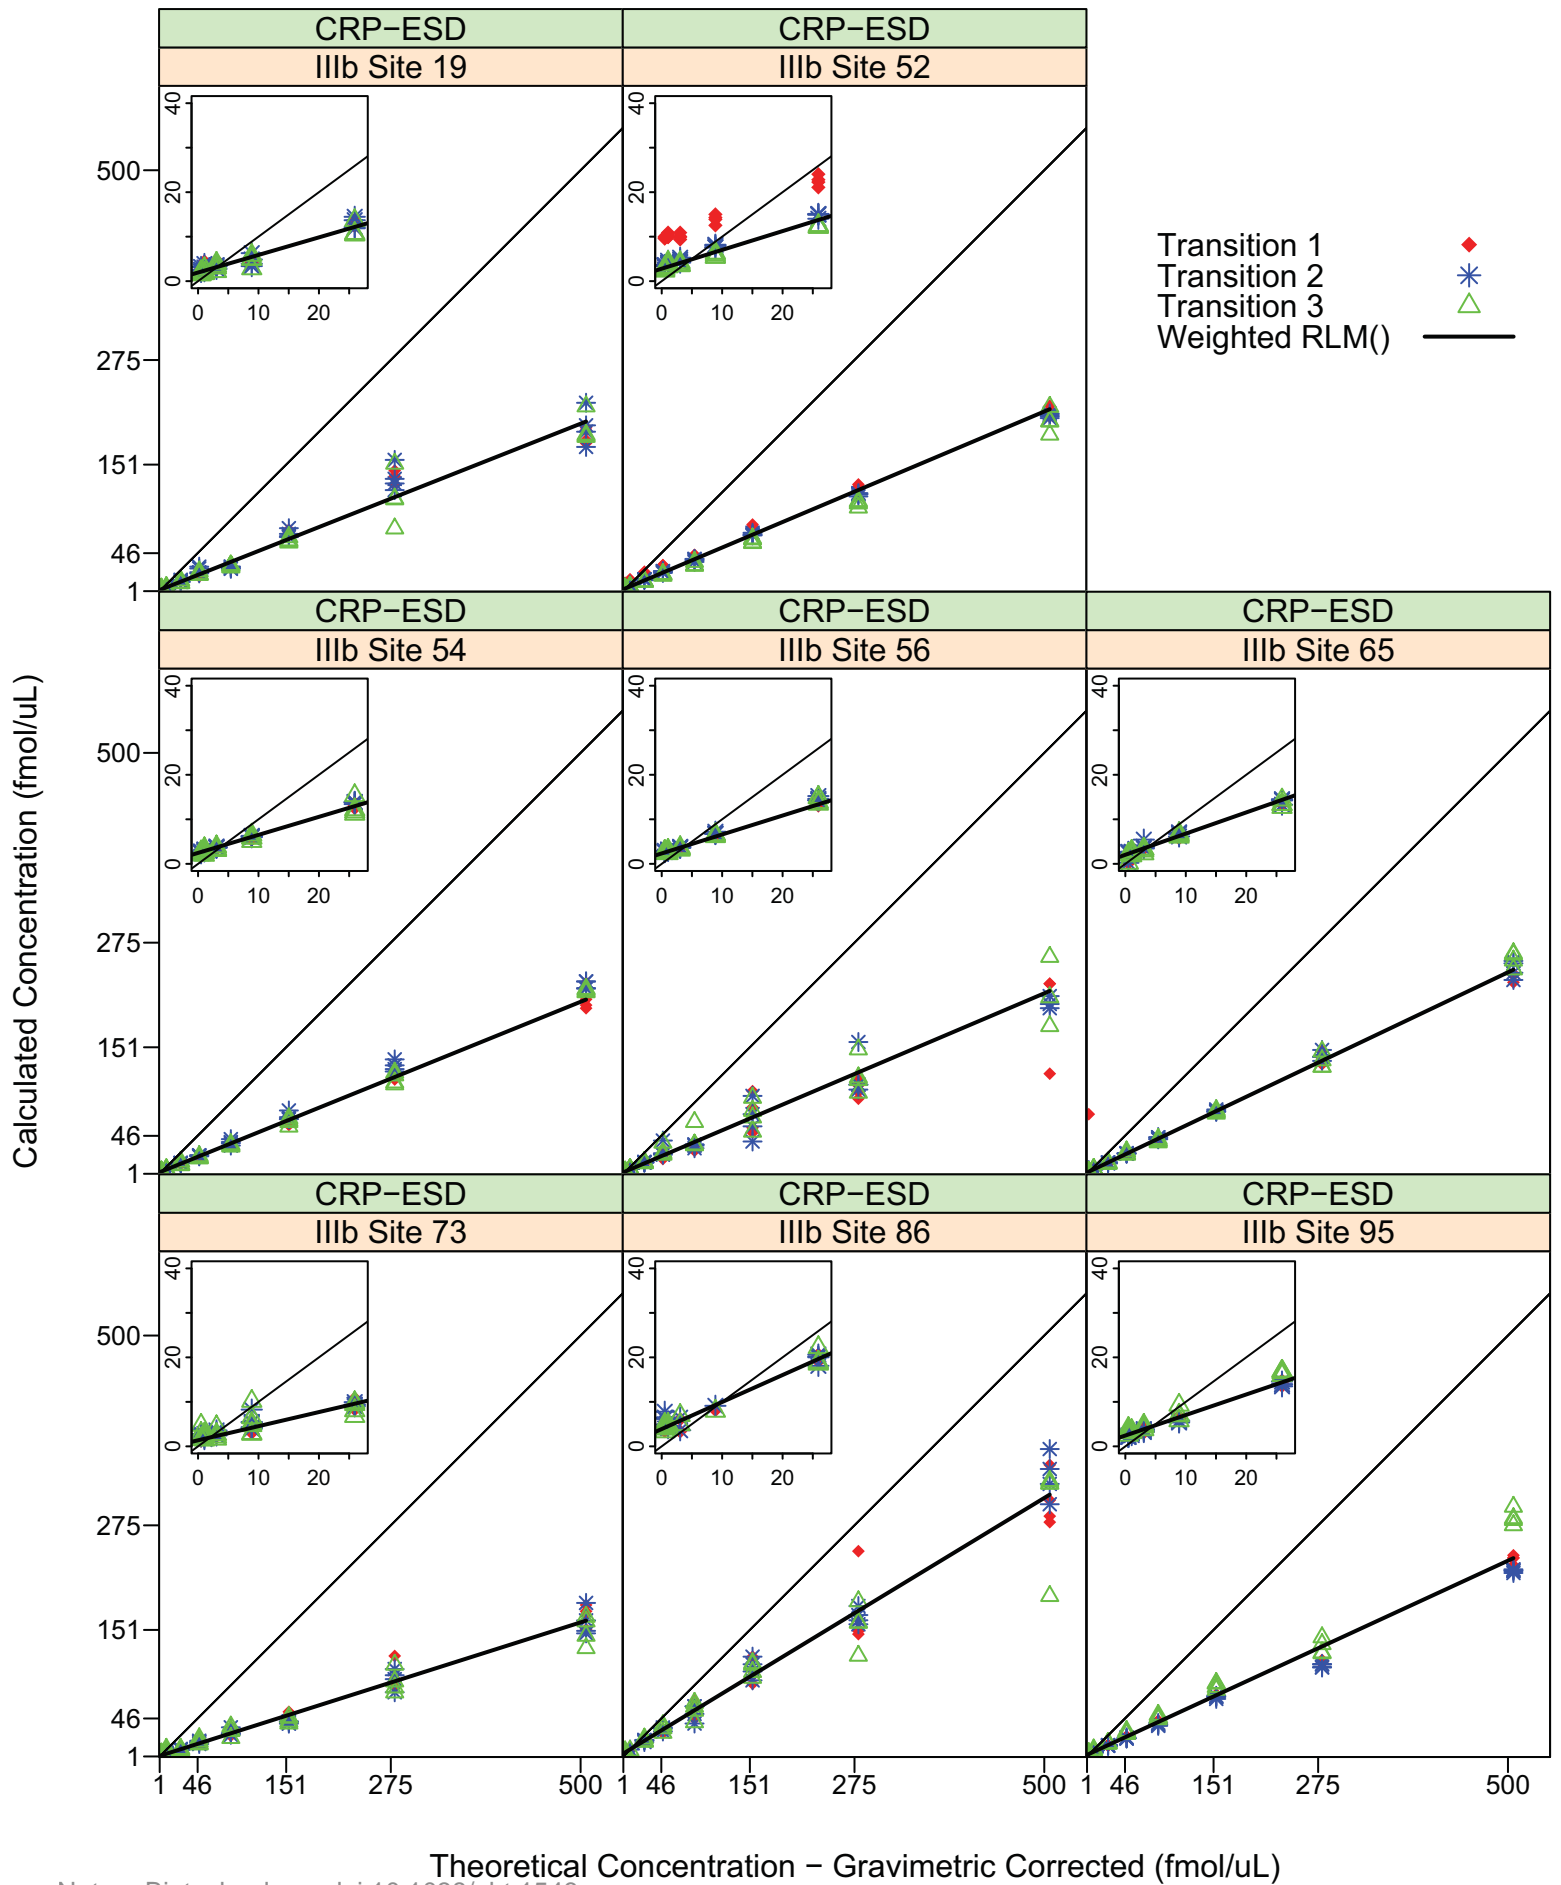

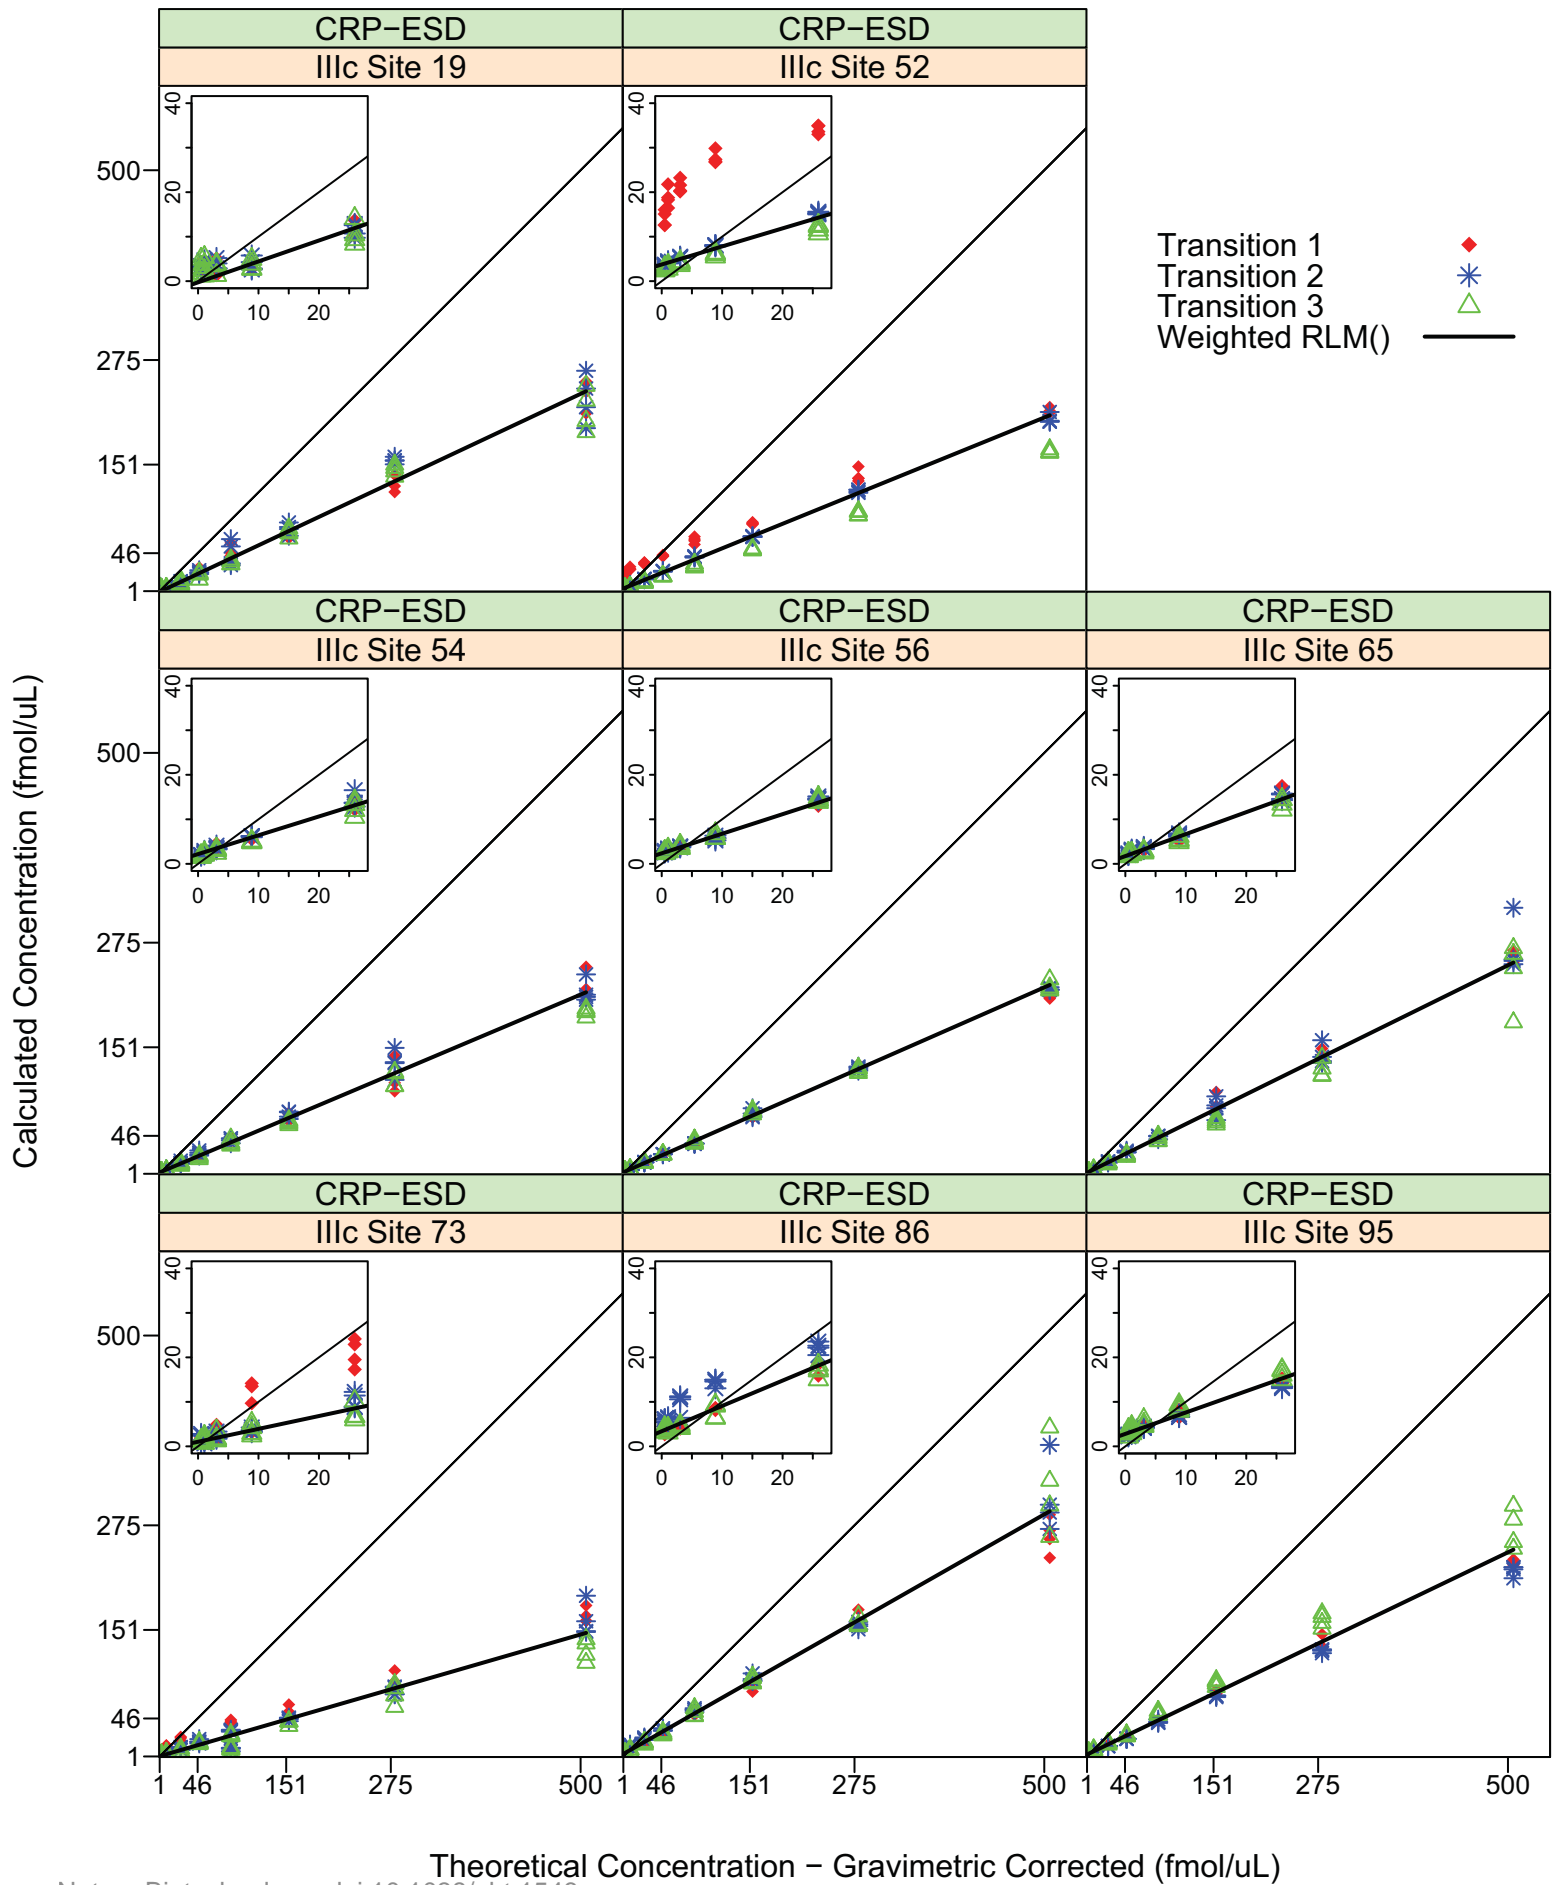

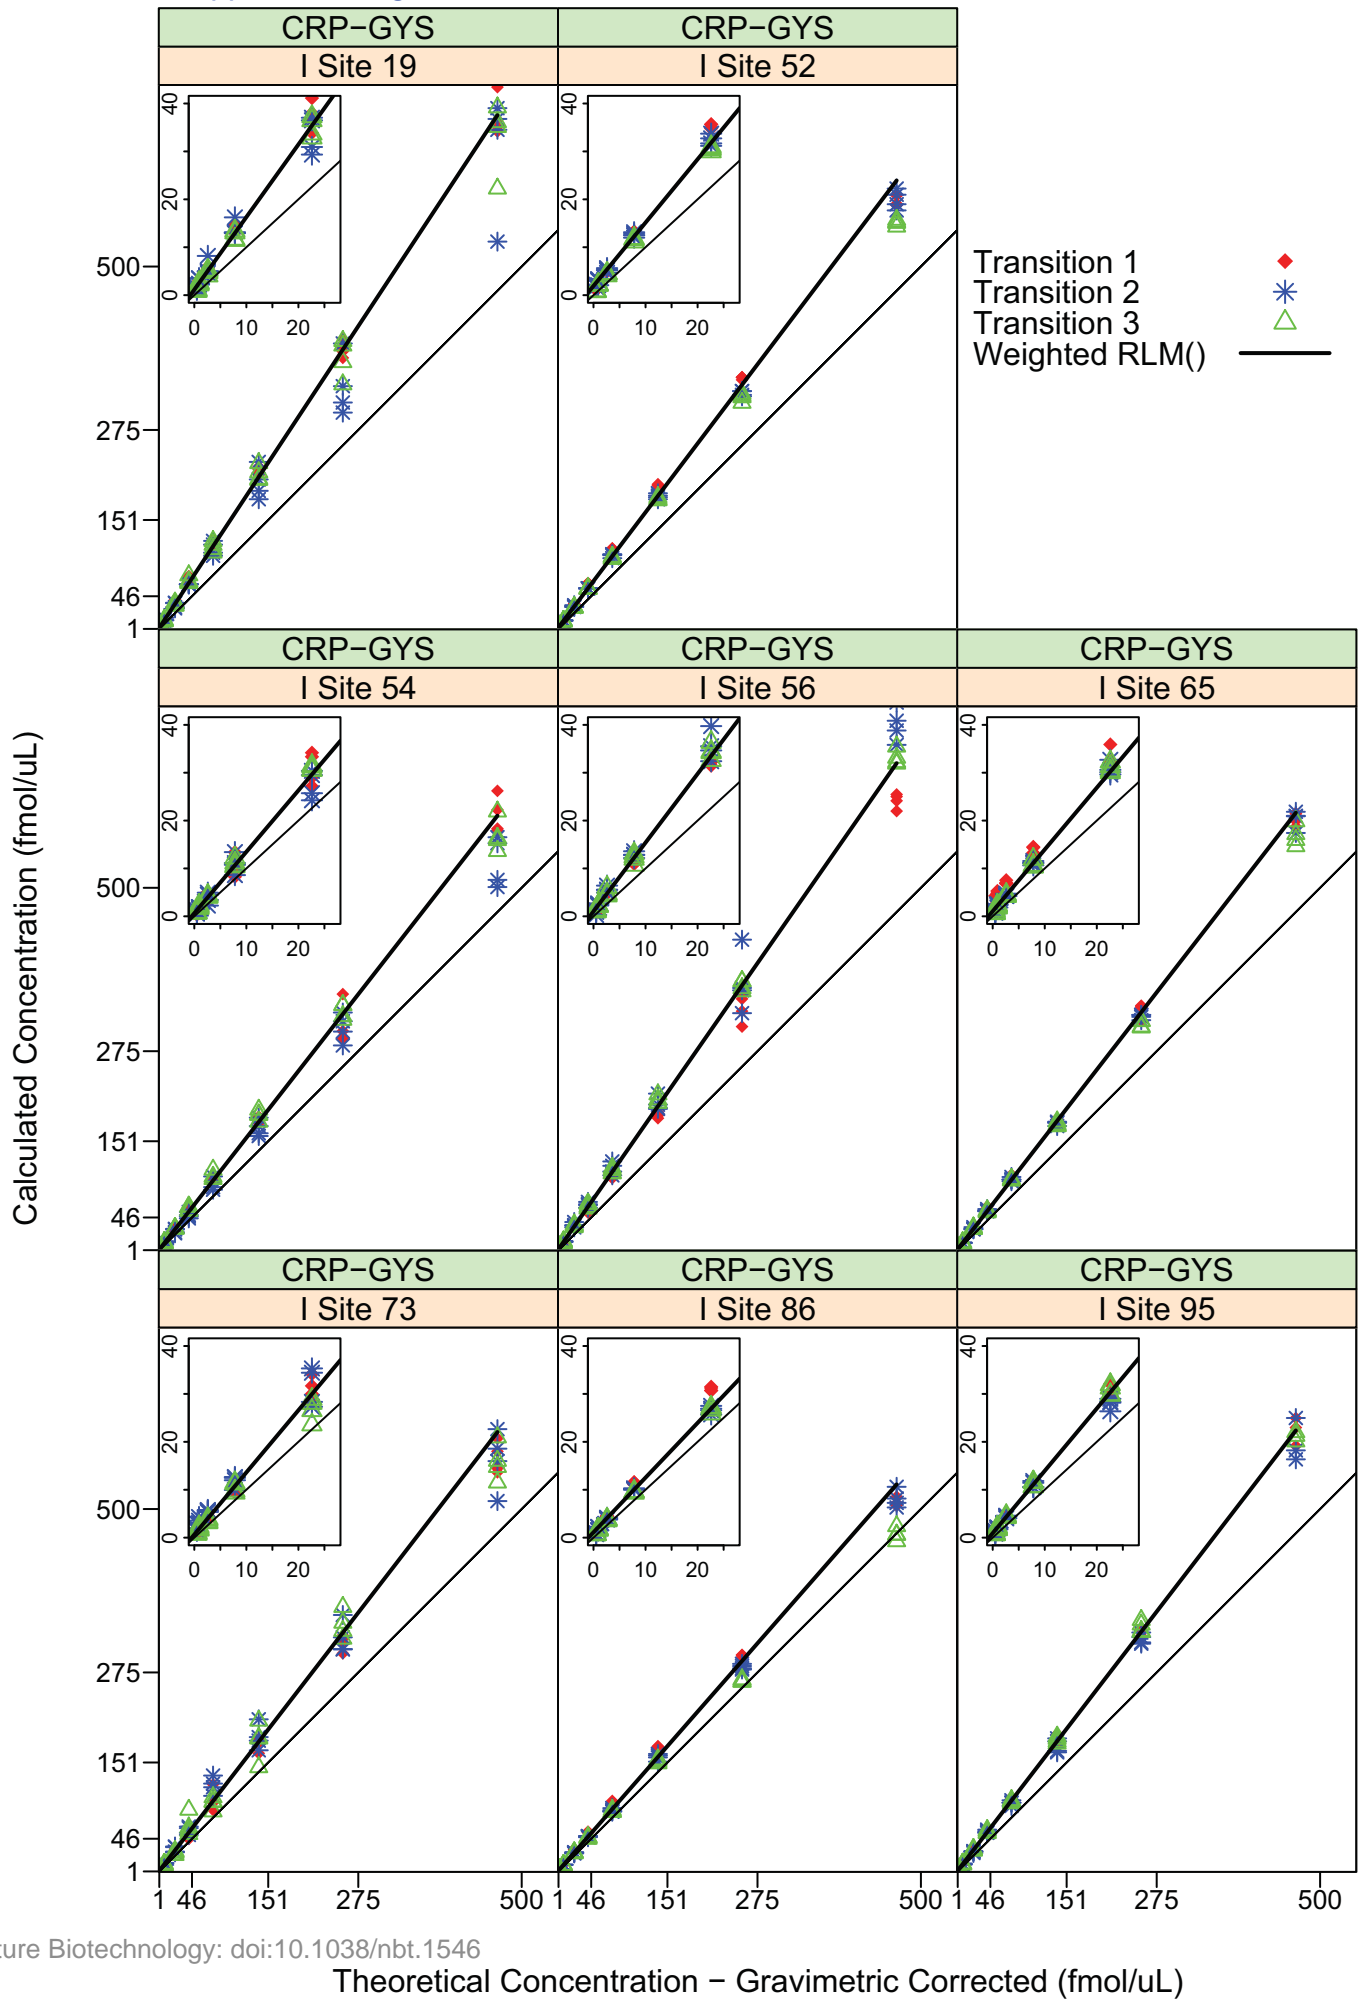

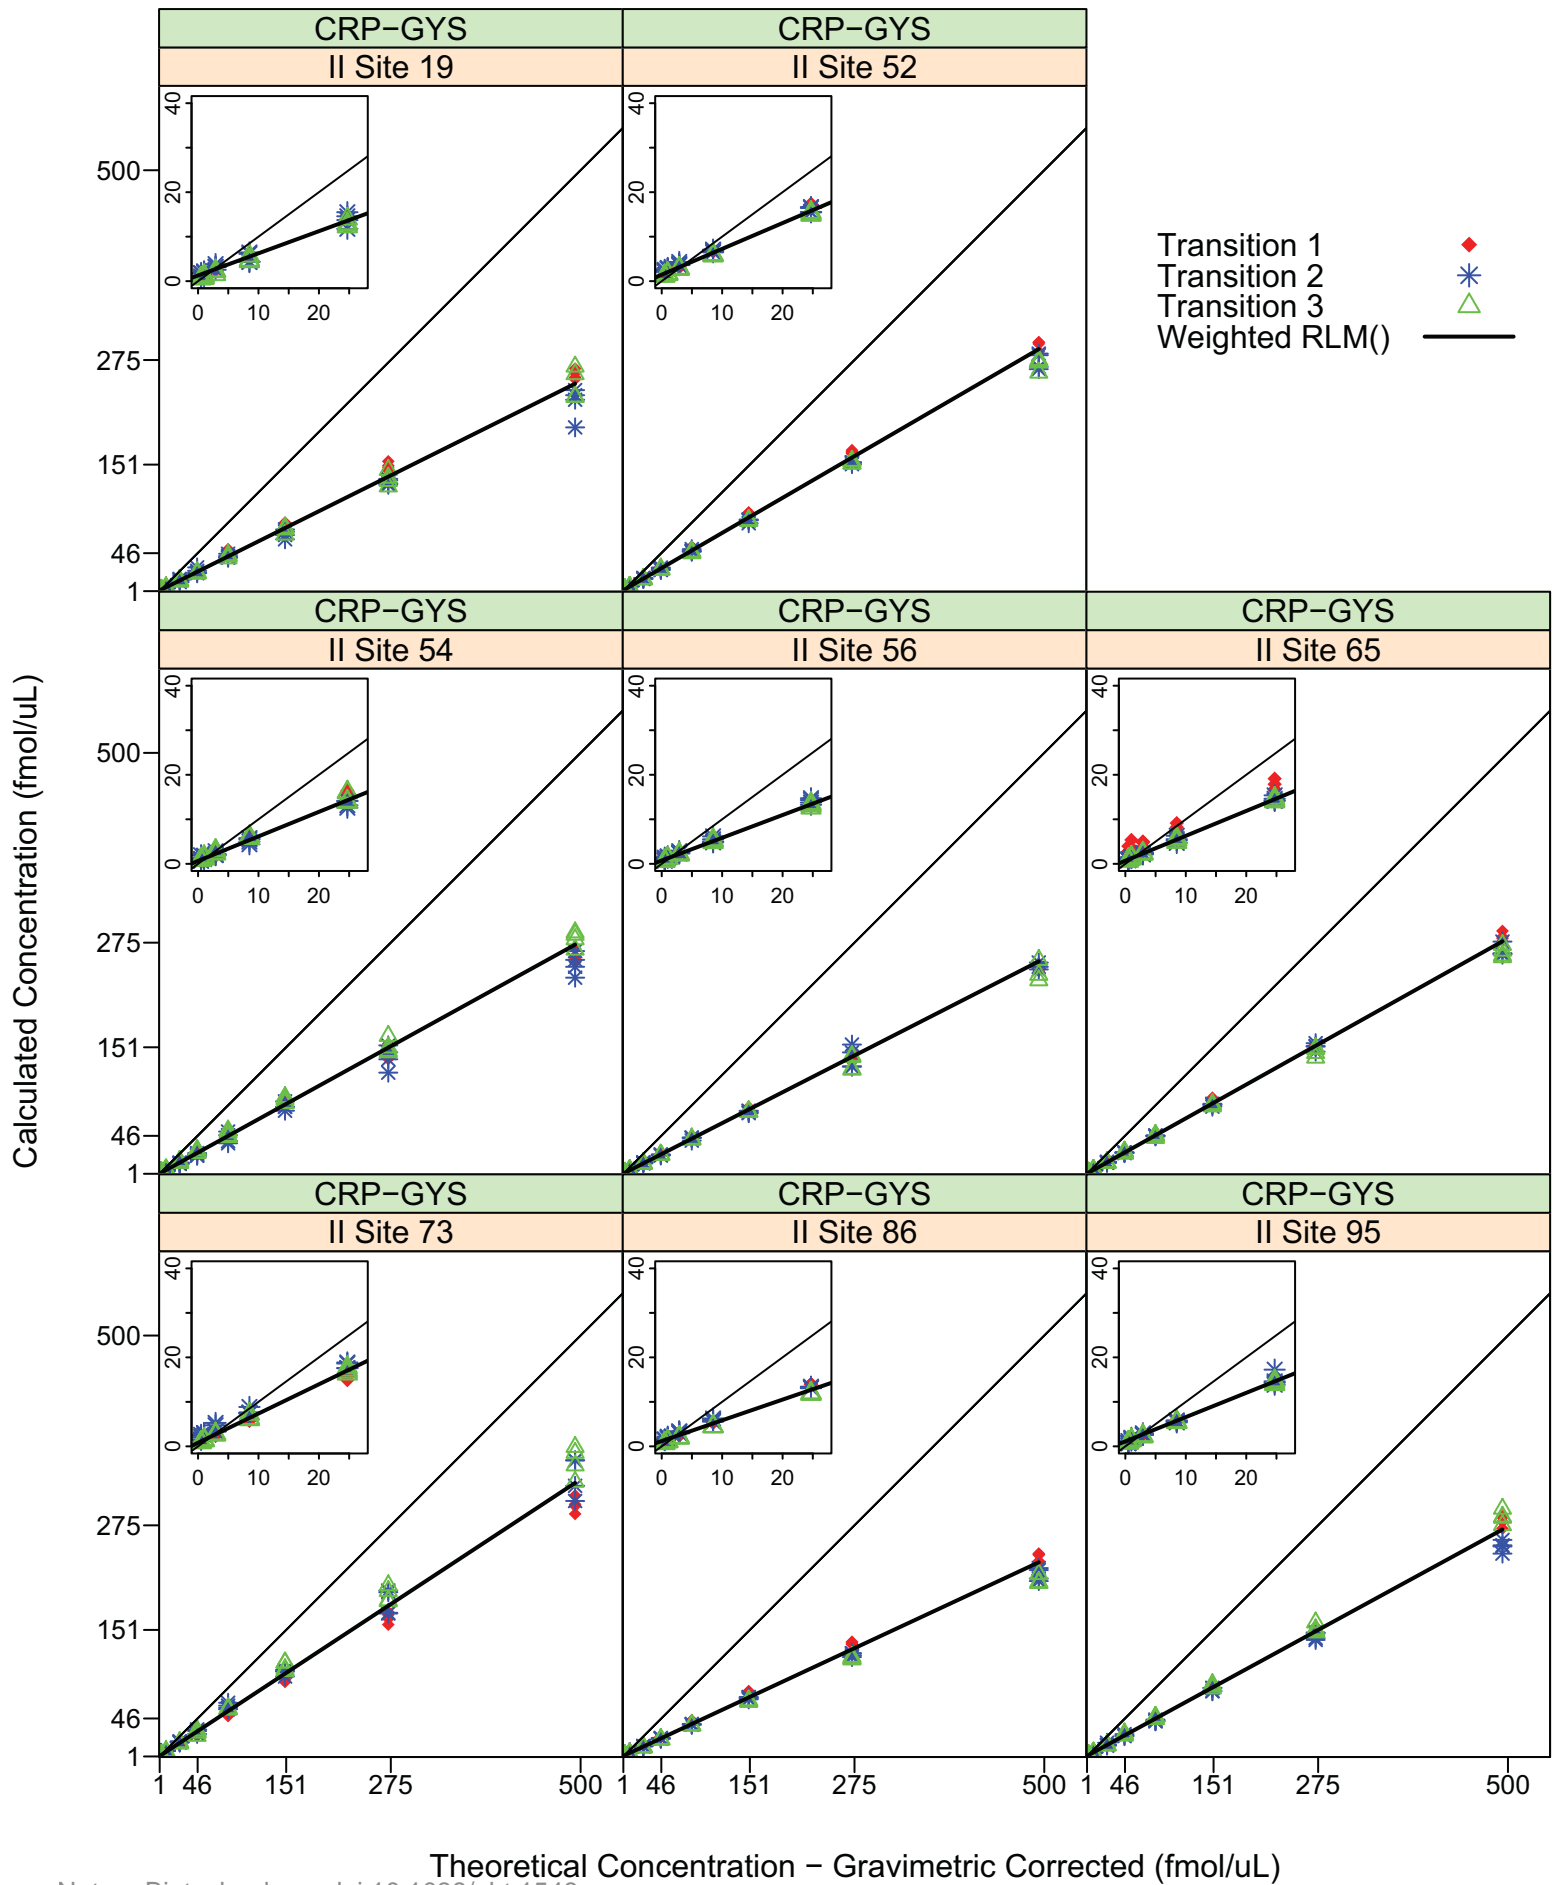

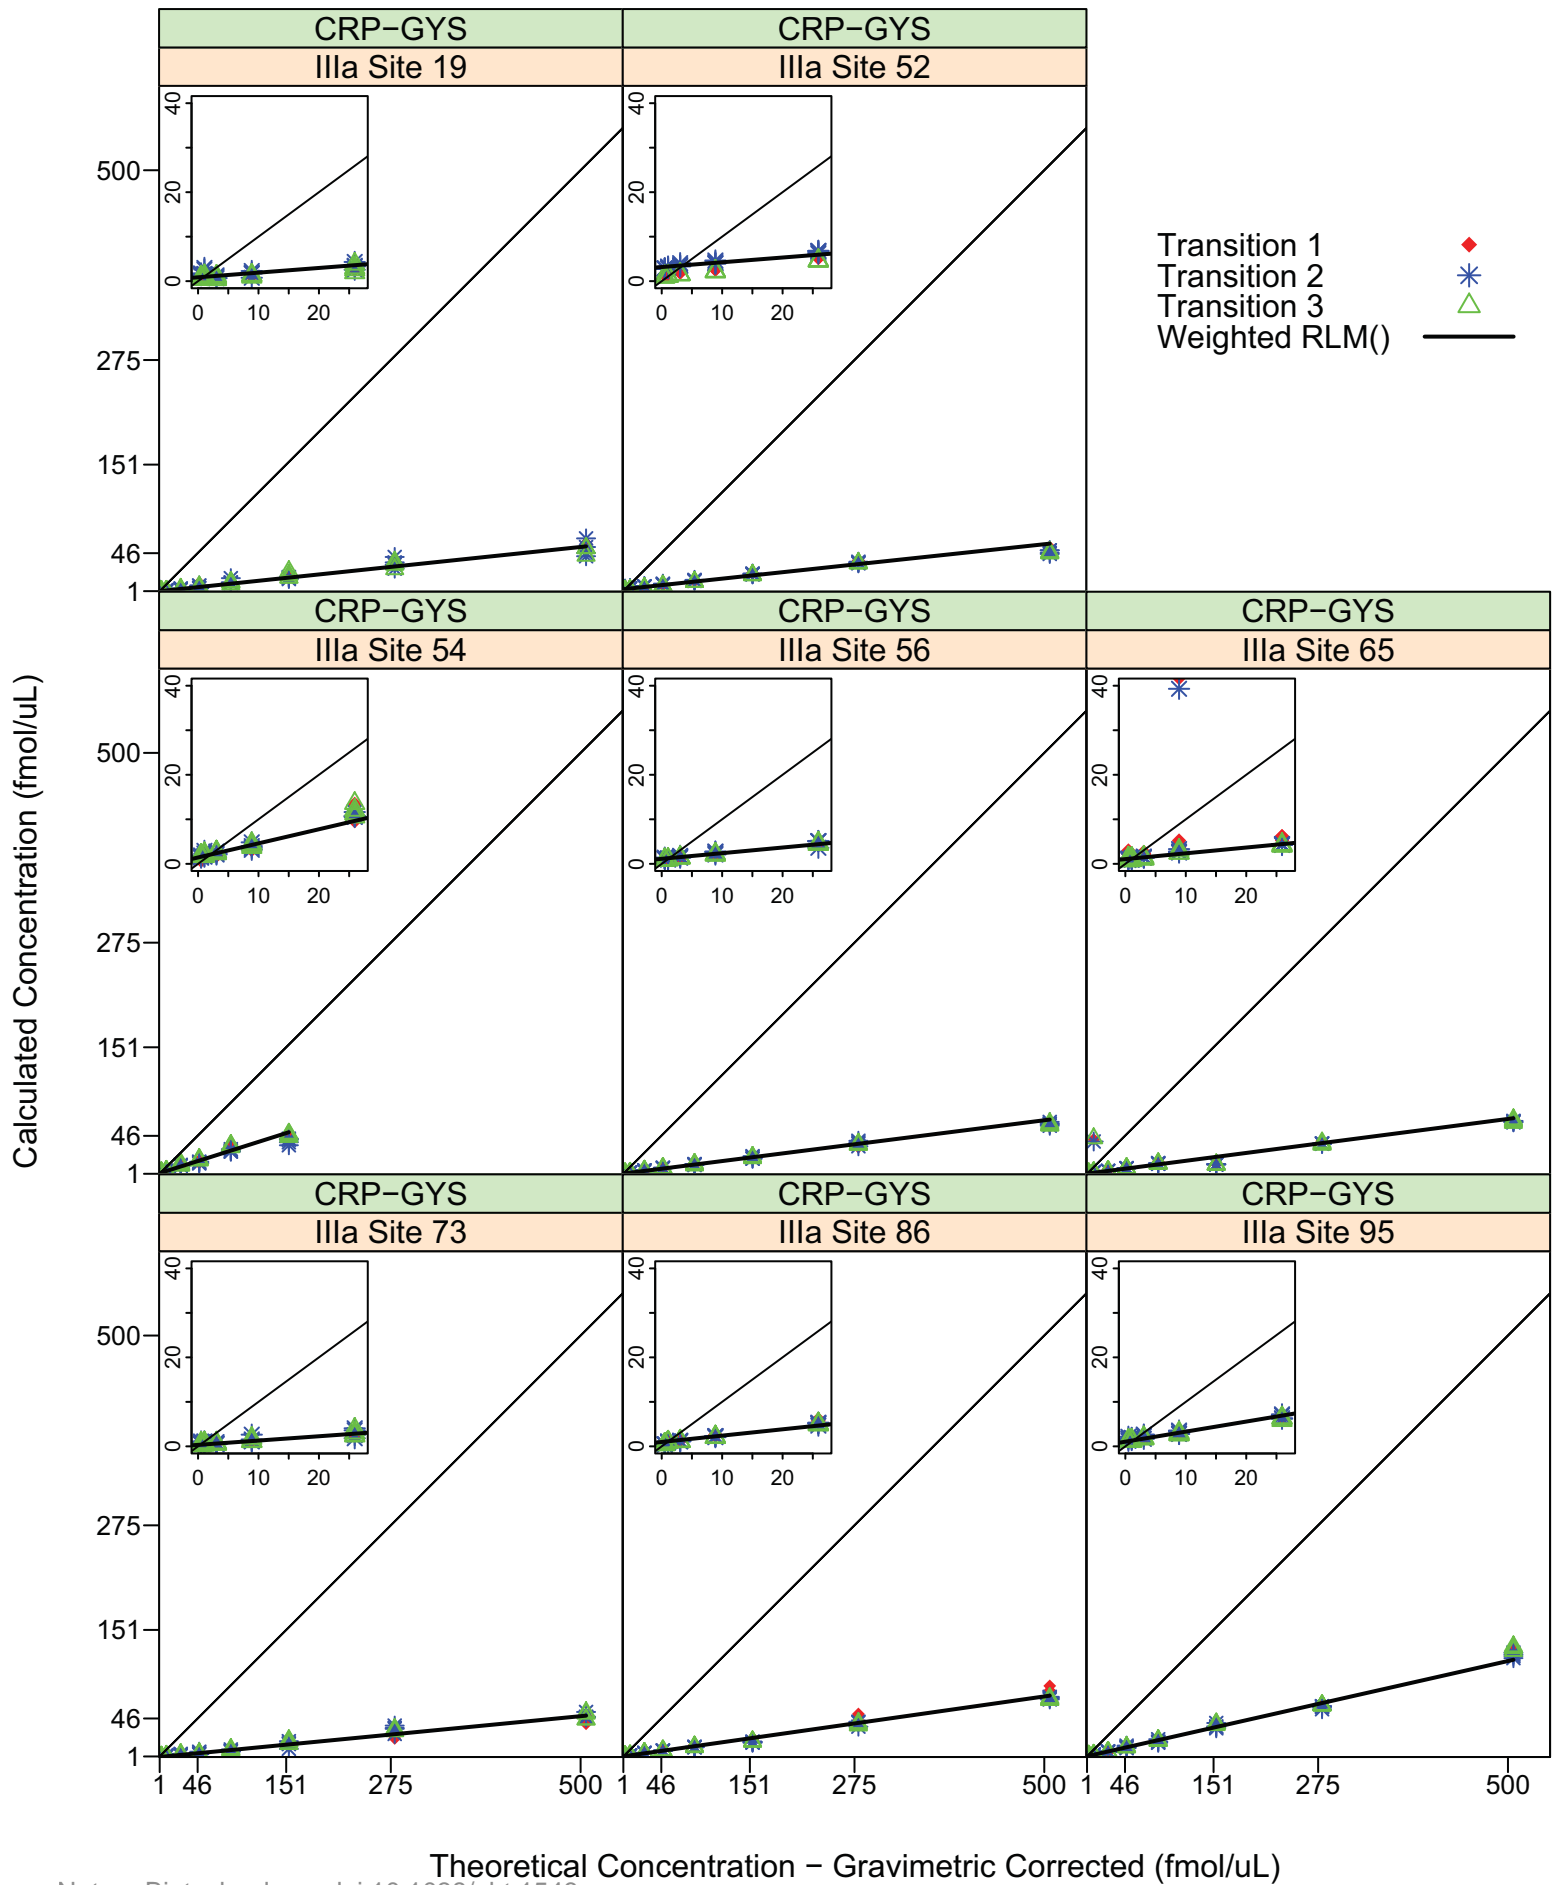

Theoretical Concentration - Gravimetric Corrected (fmol/uL)

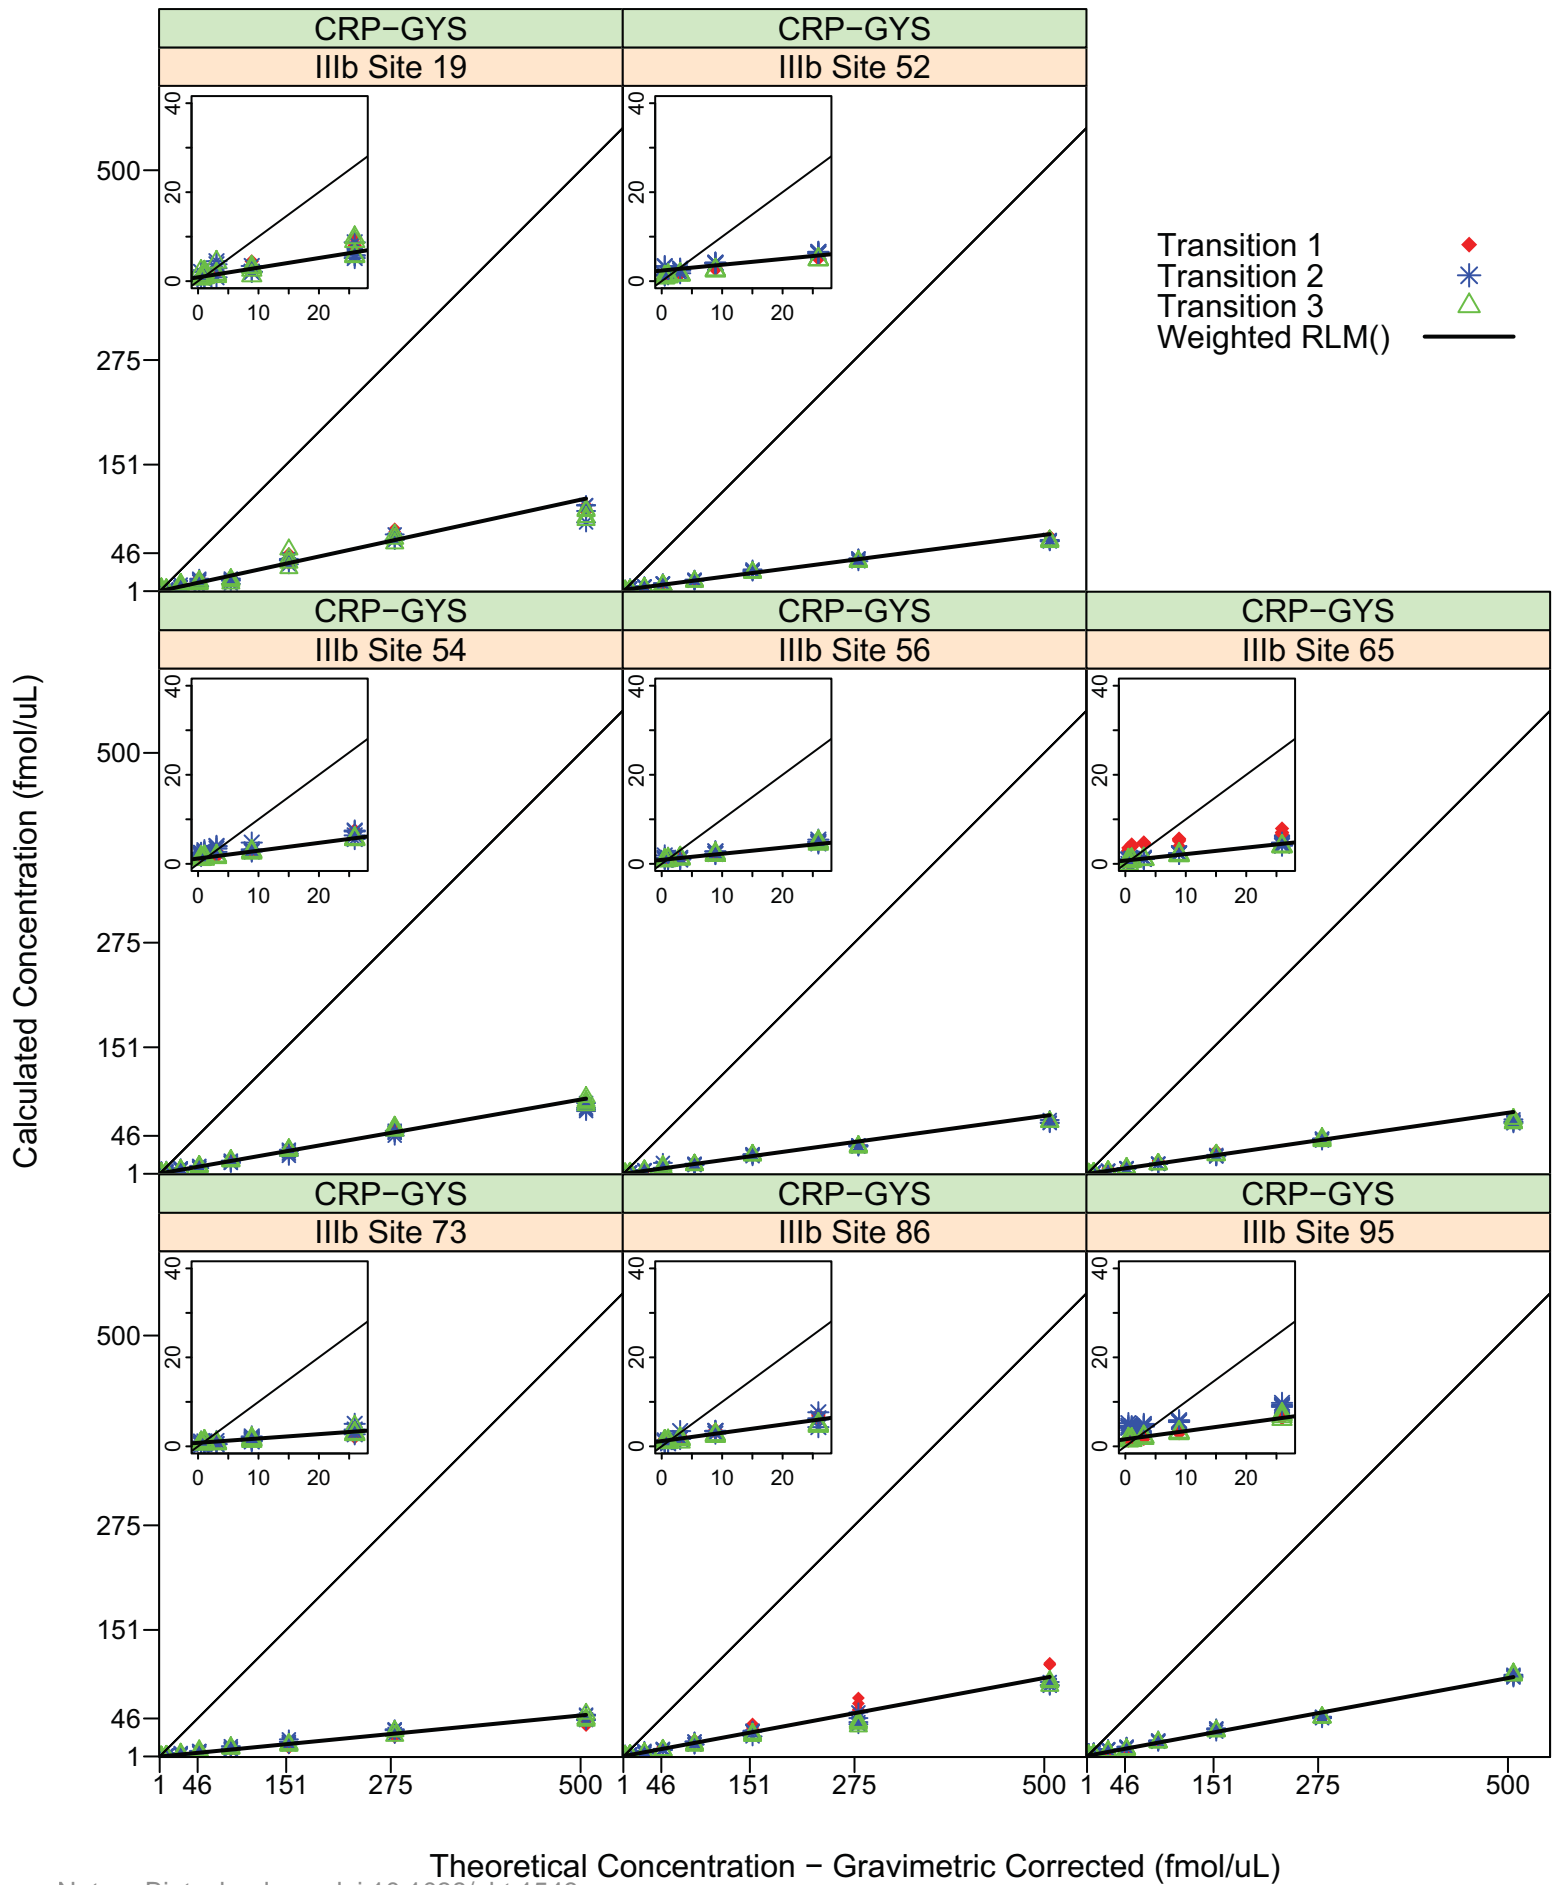

Theoretical Concentration - Gravimetric Corrected (fmol/uL)

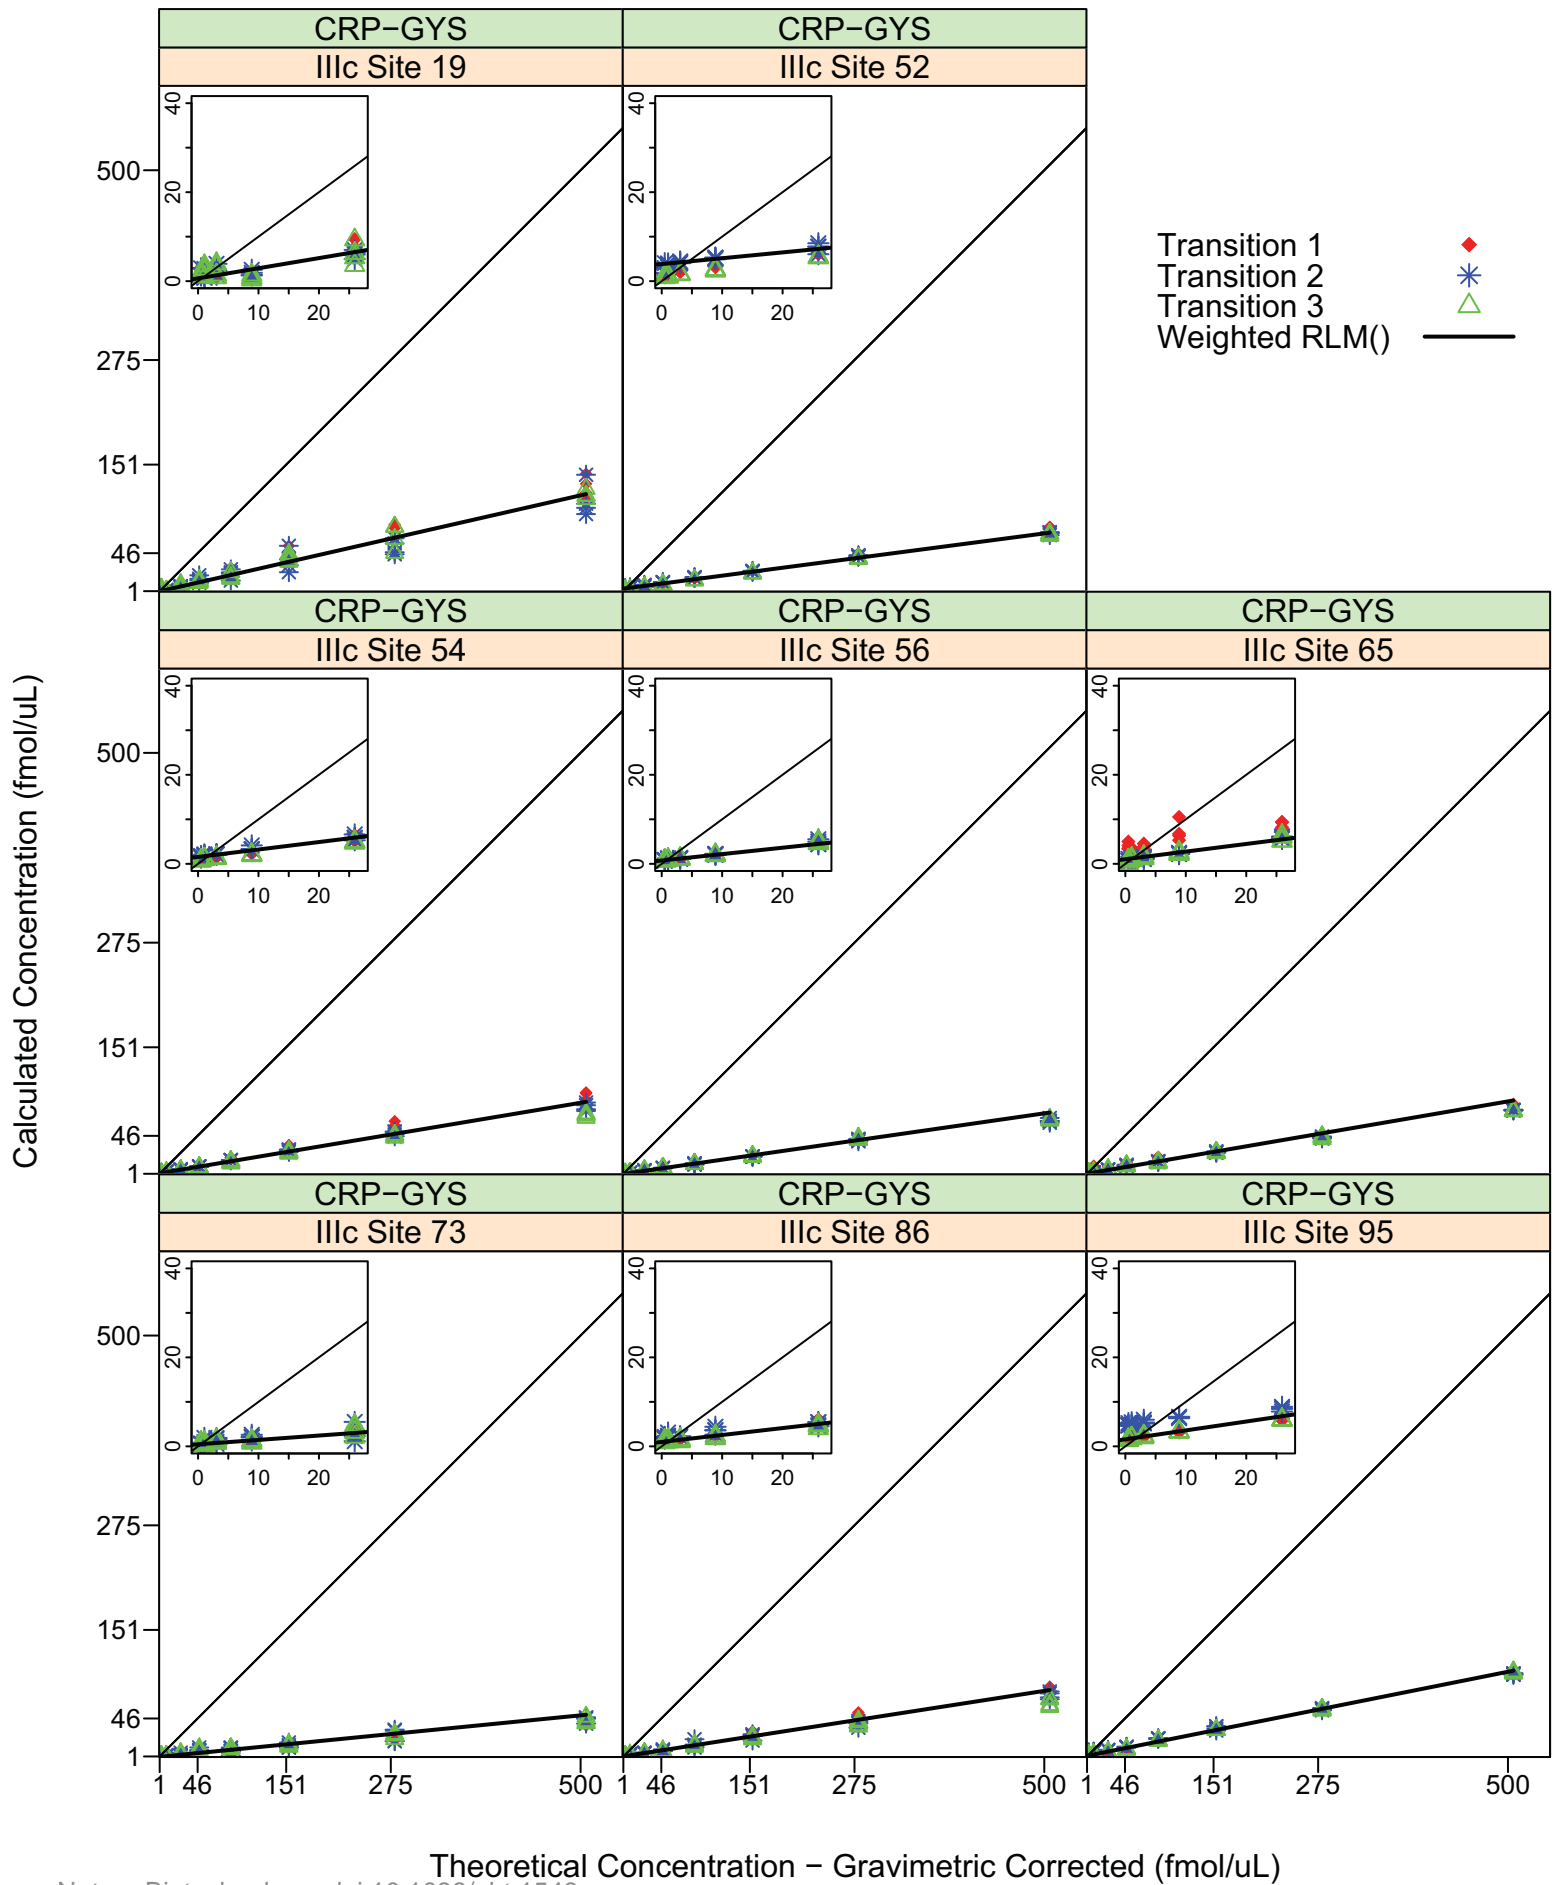

Theoretical Concentration - Gravimetric Corrected (fmol/uL)



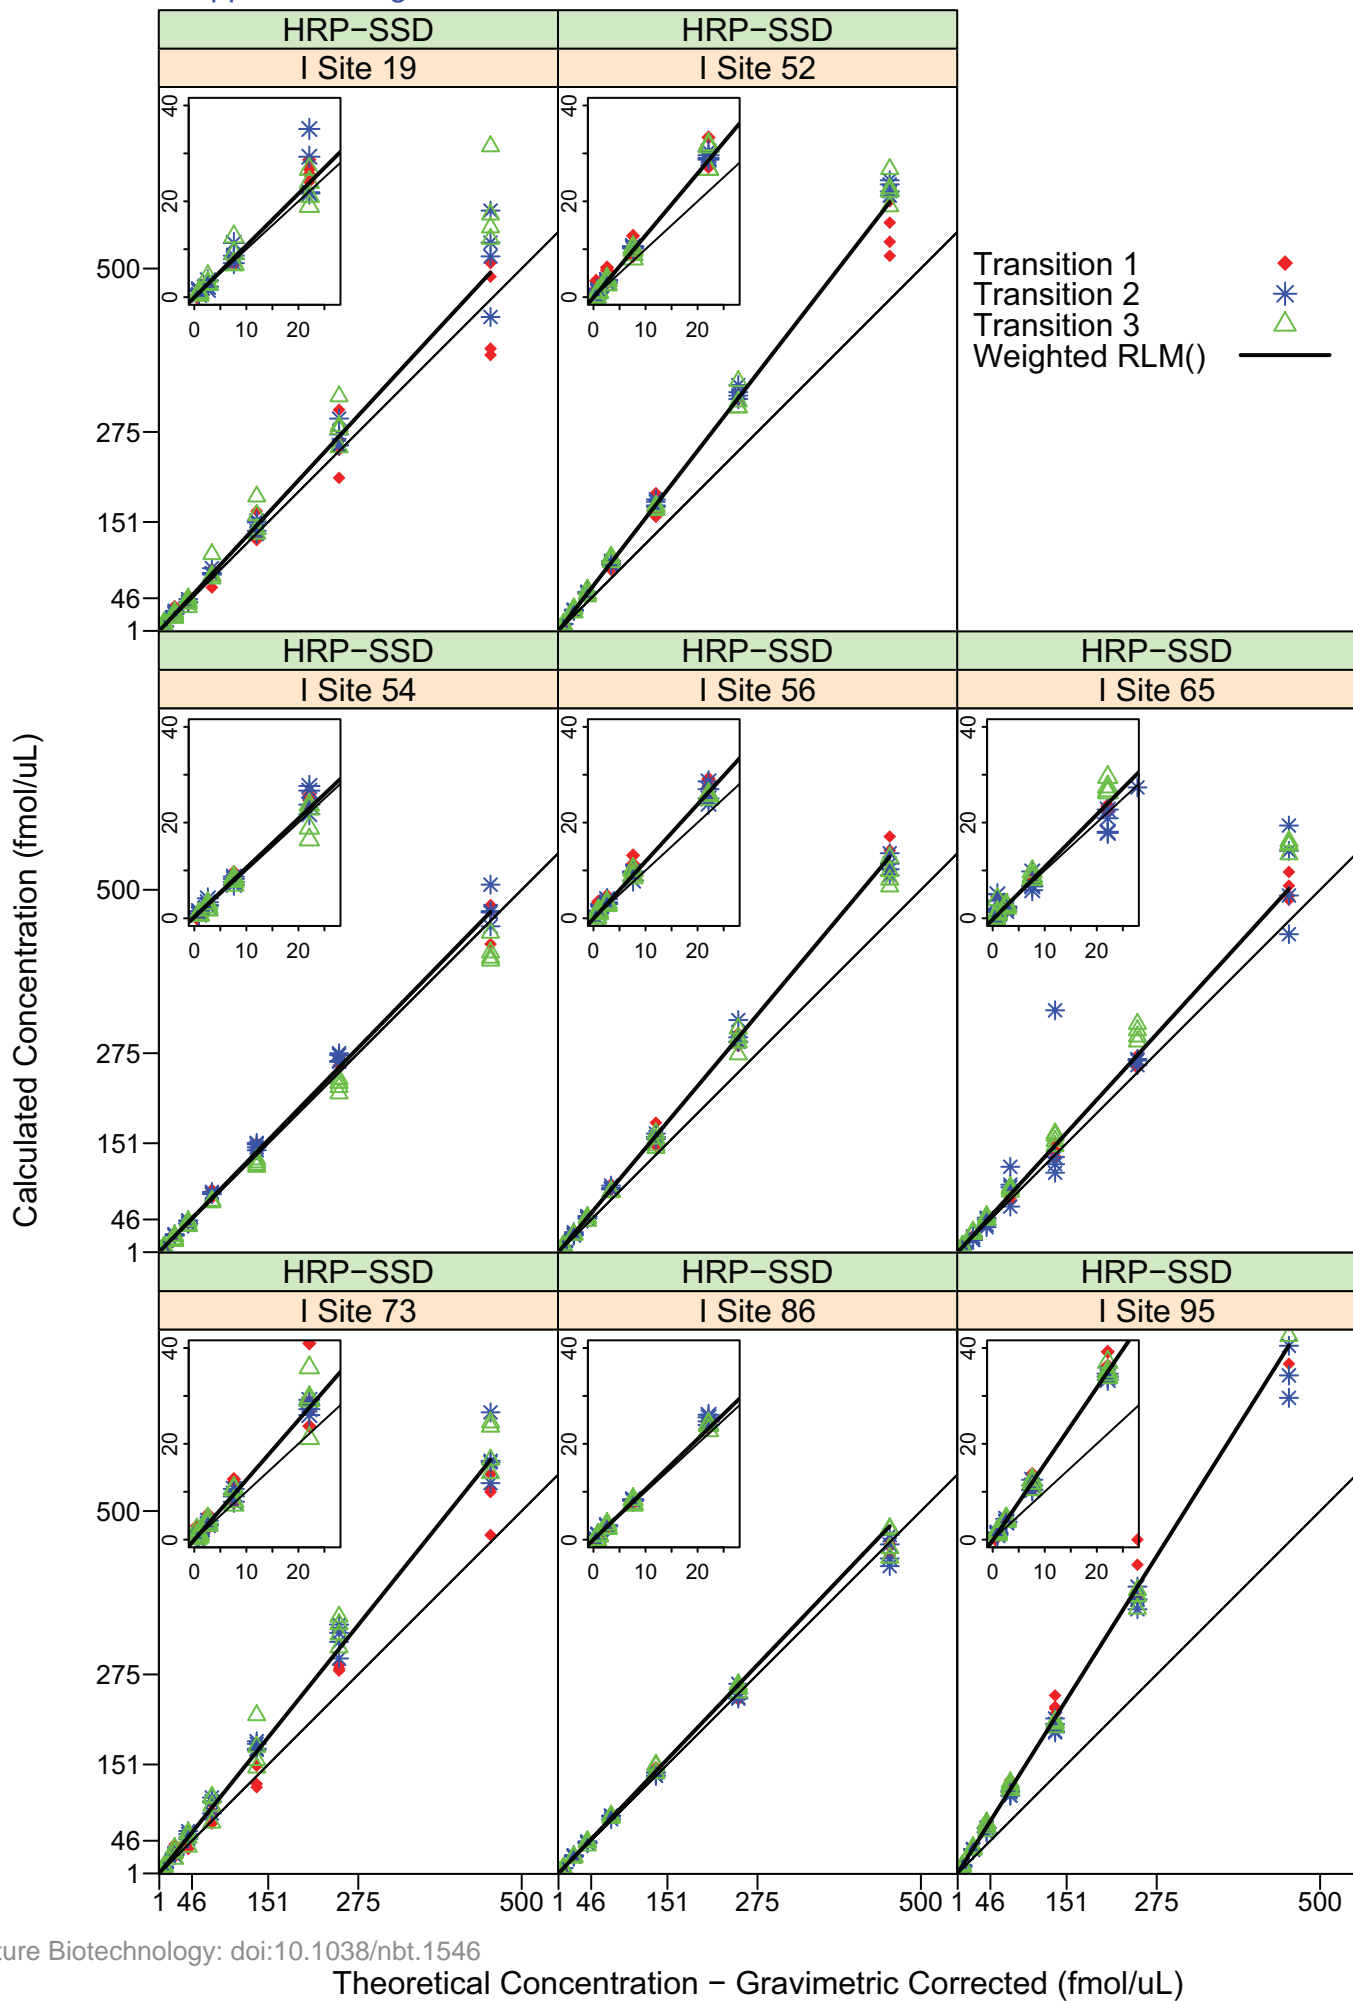

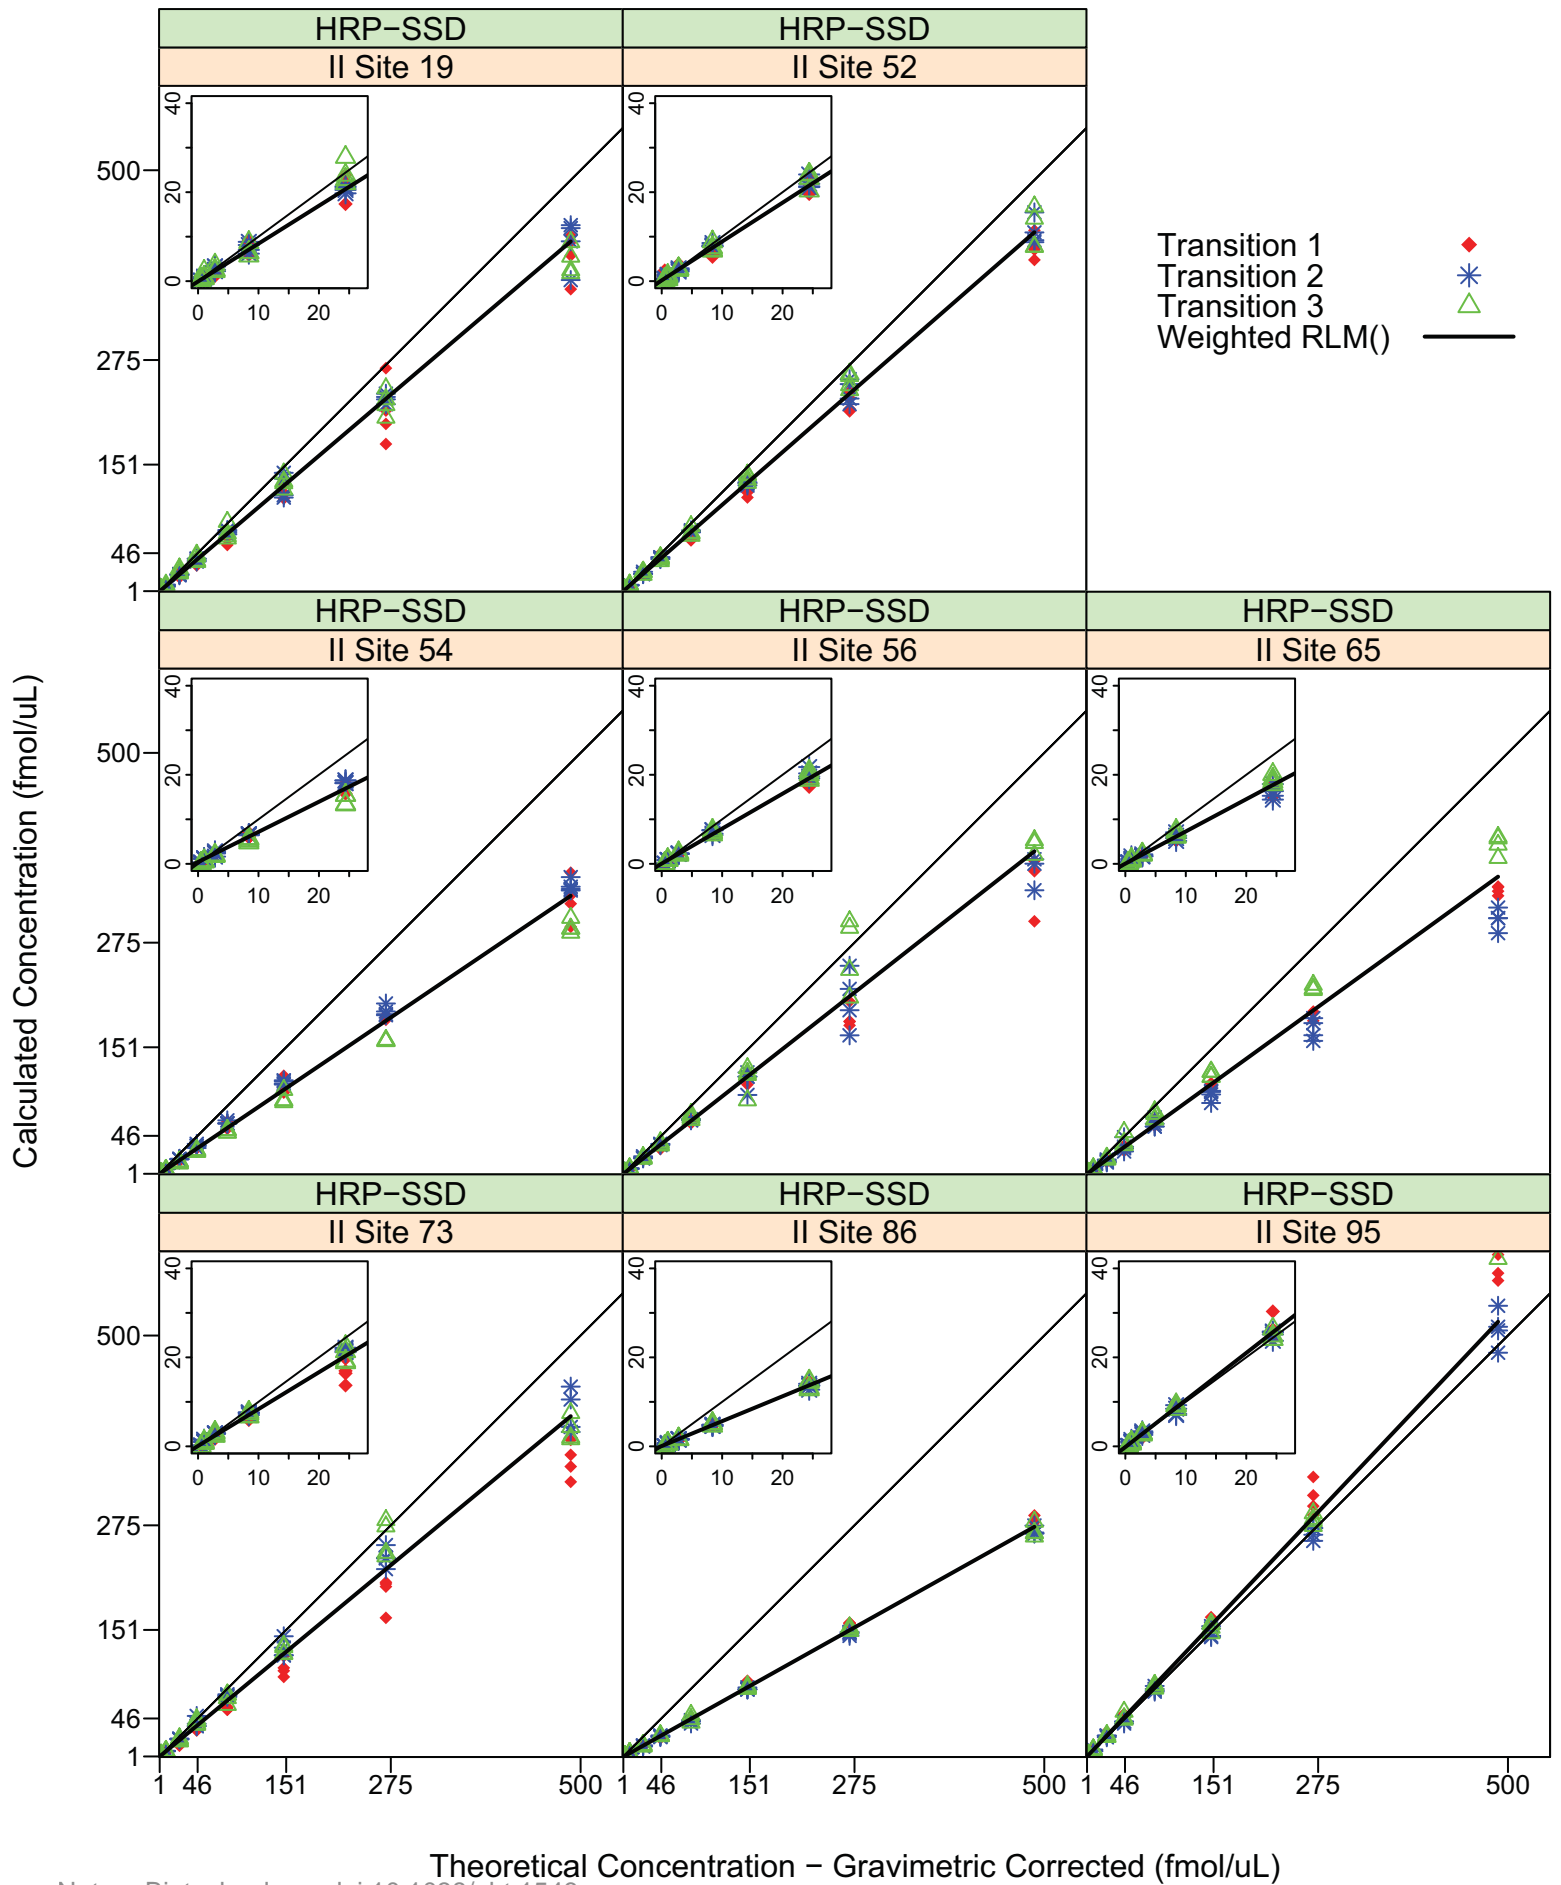

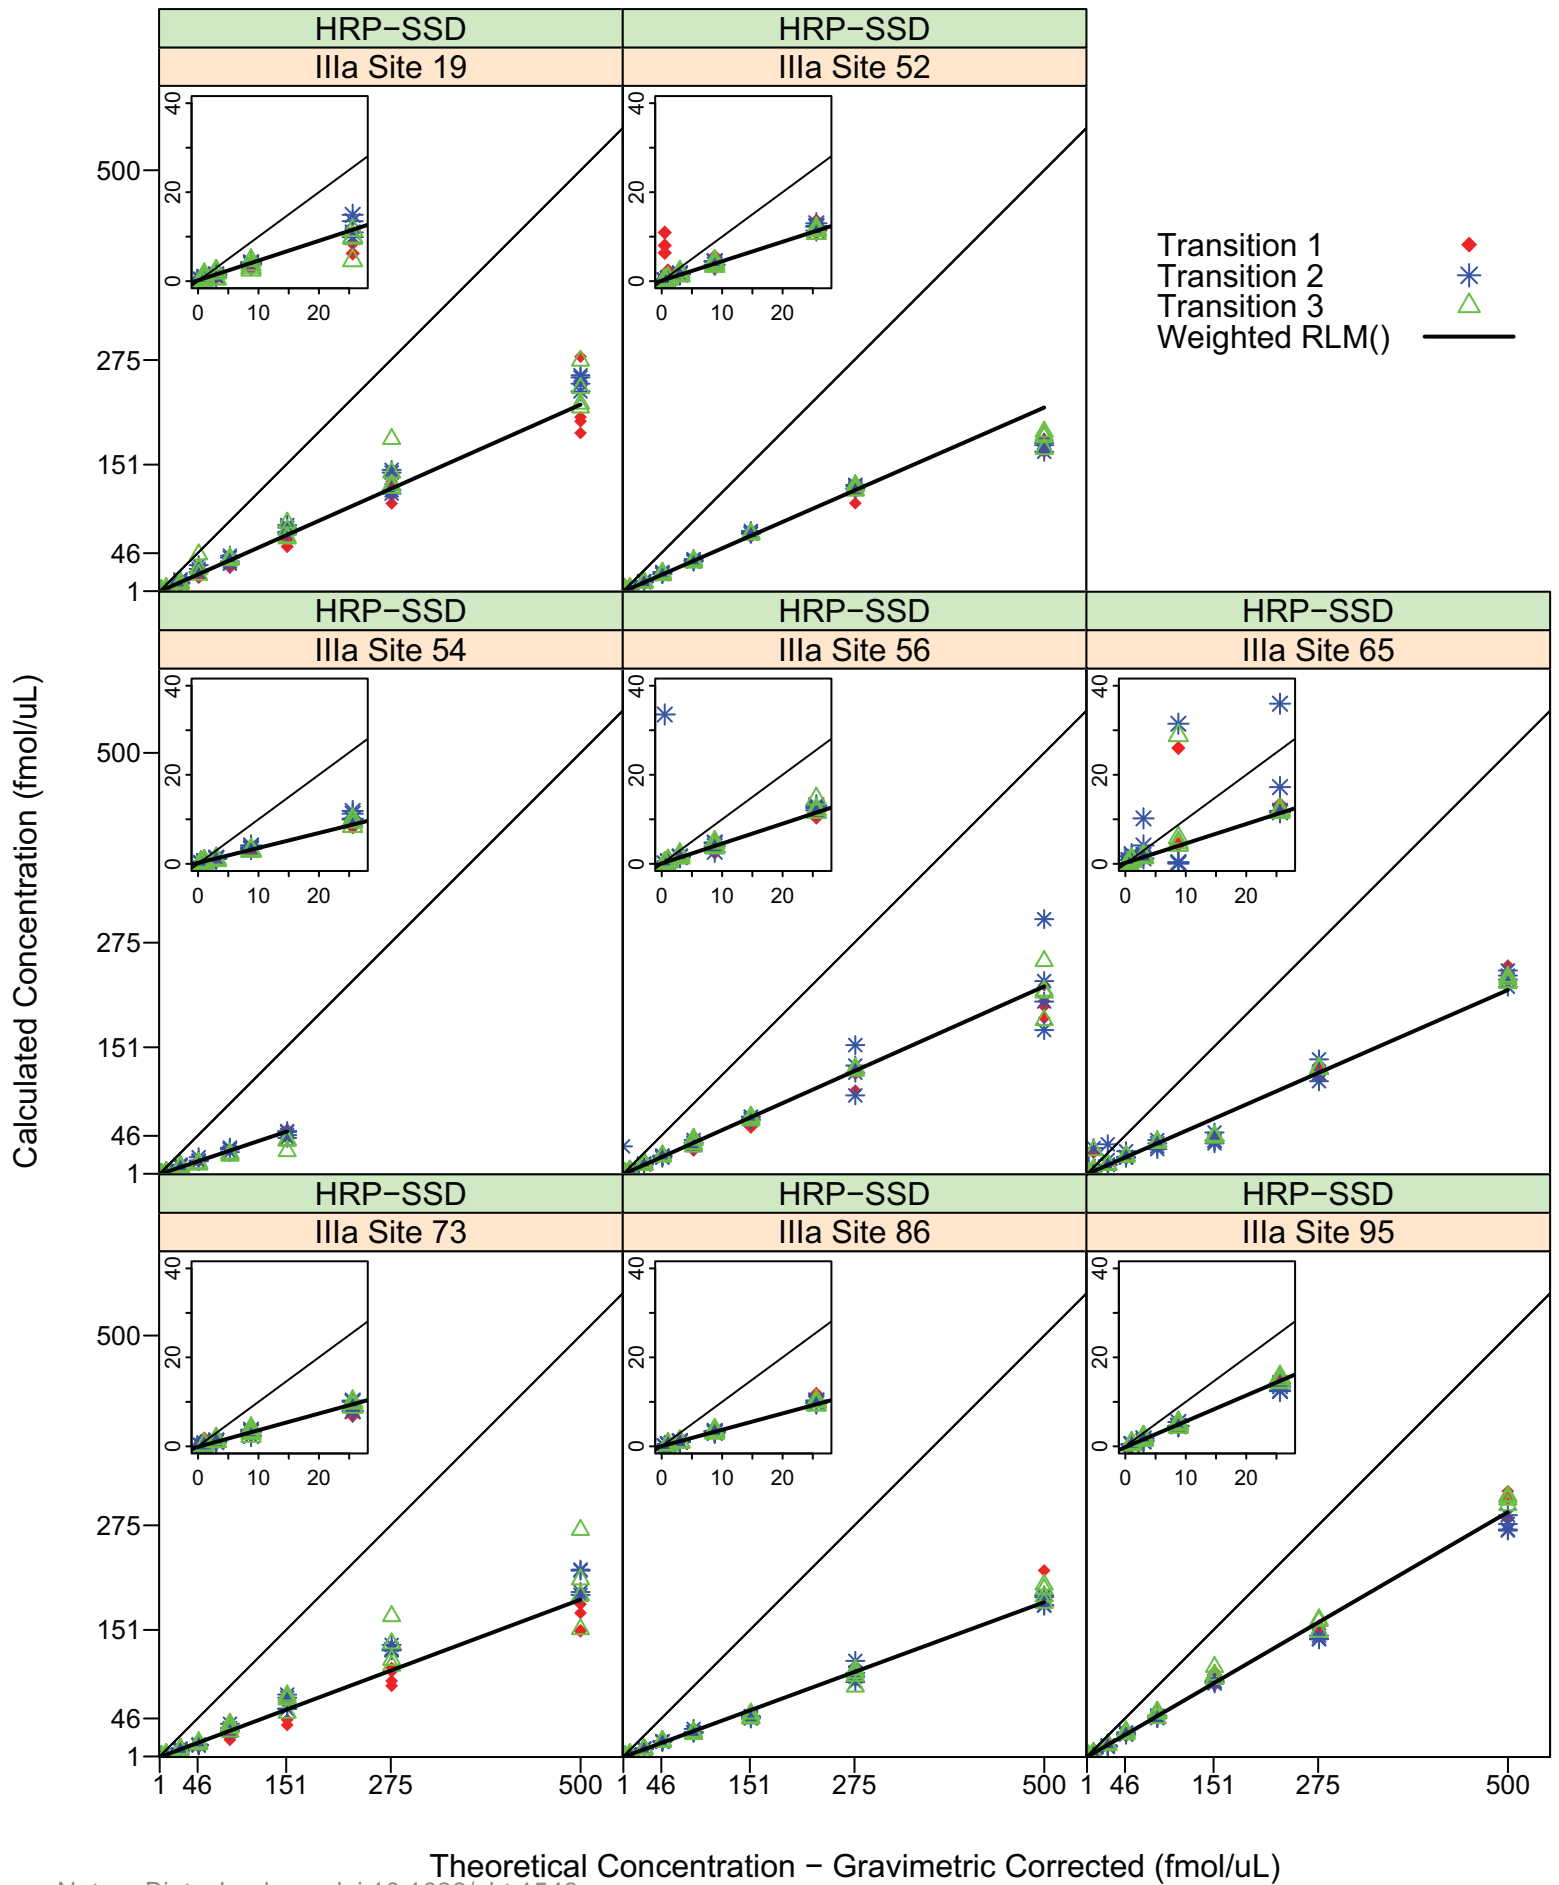

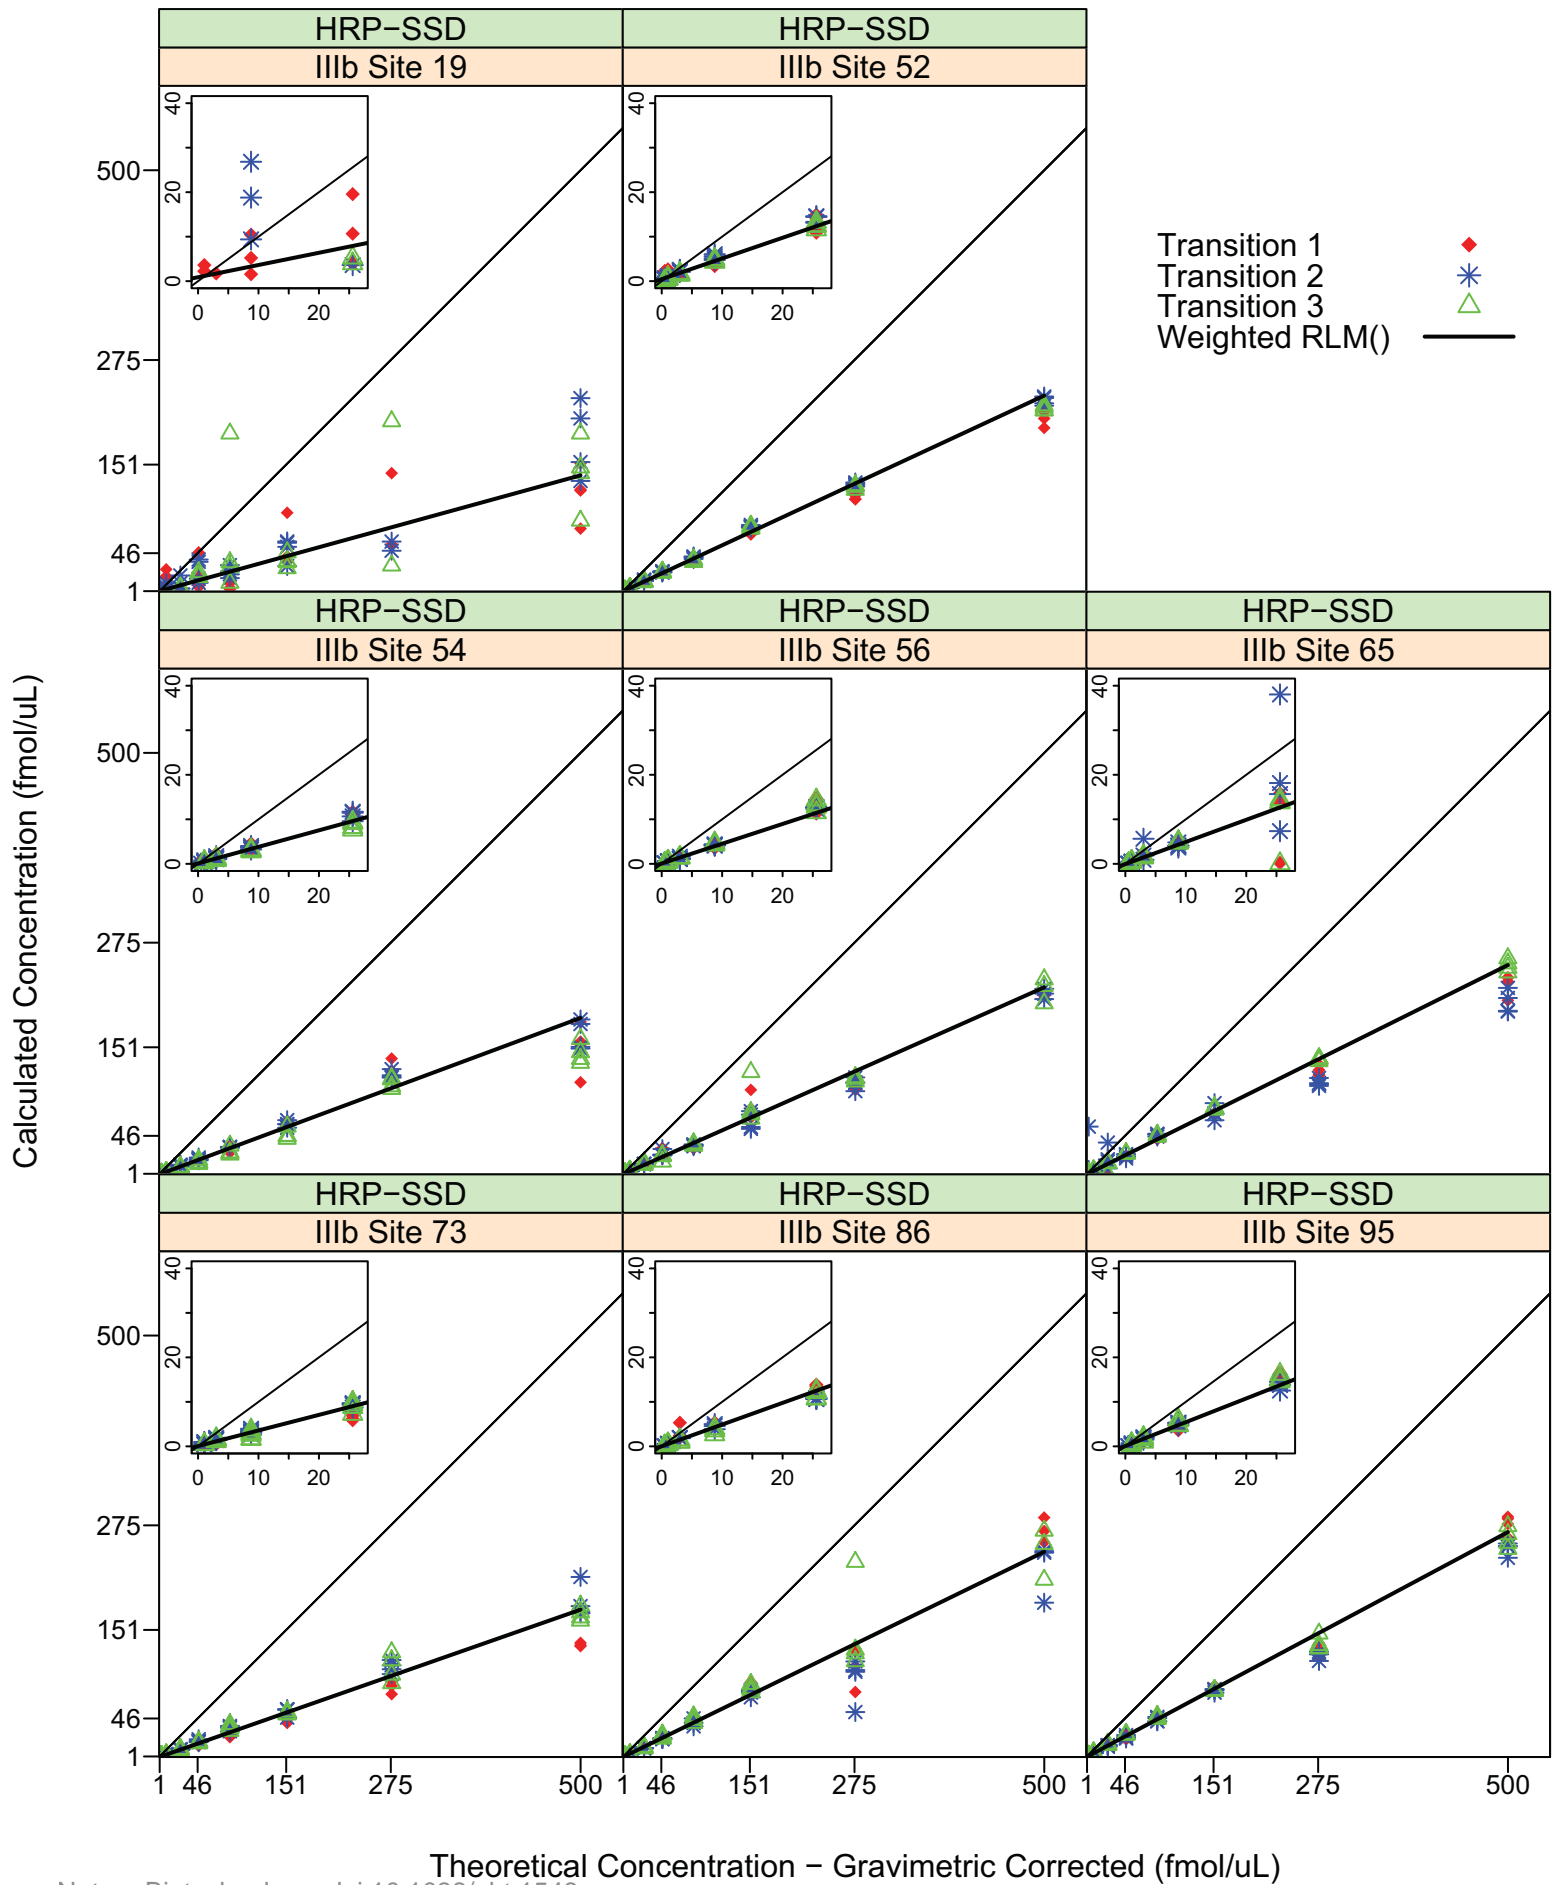

Theoretical Concentration - Gravimetric Corrected (fmol/uL)

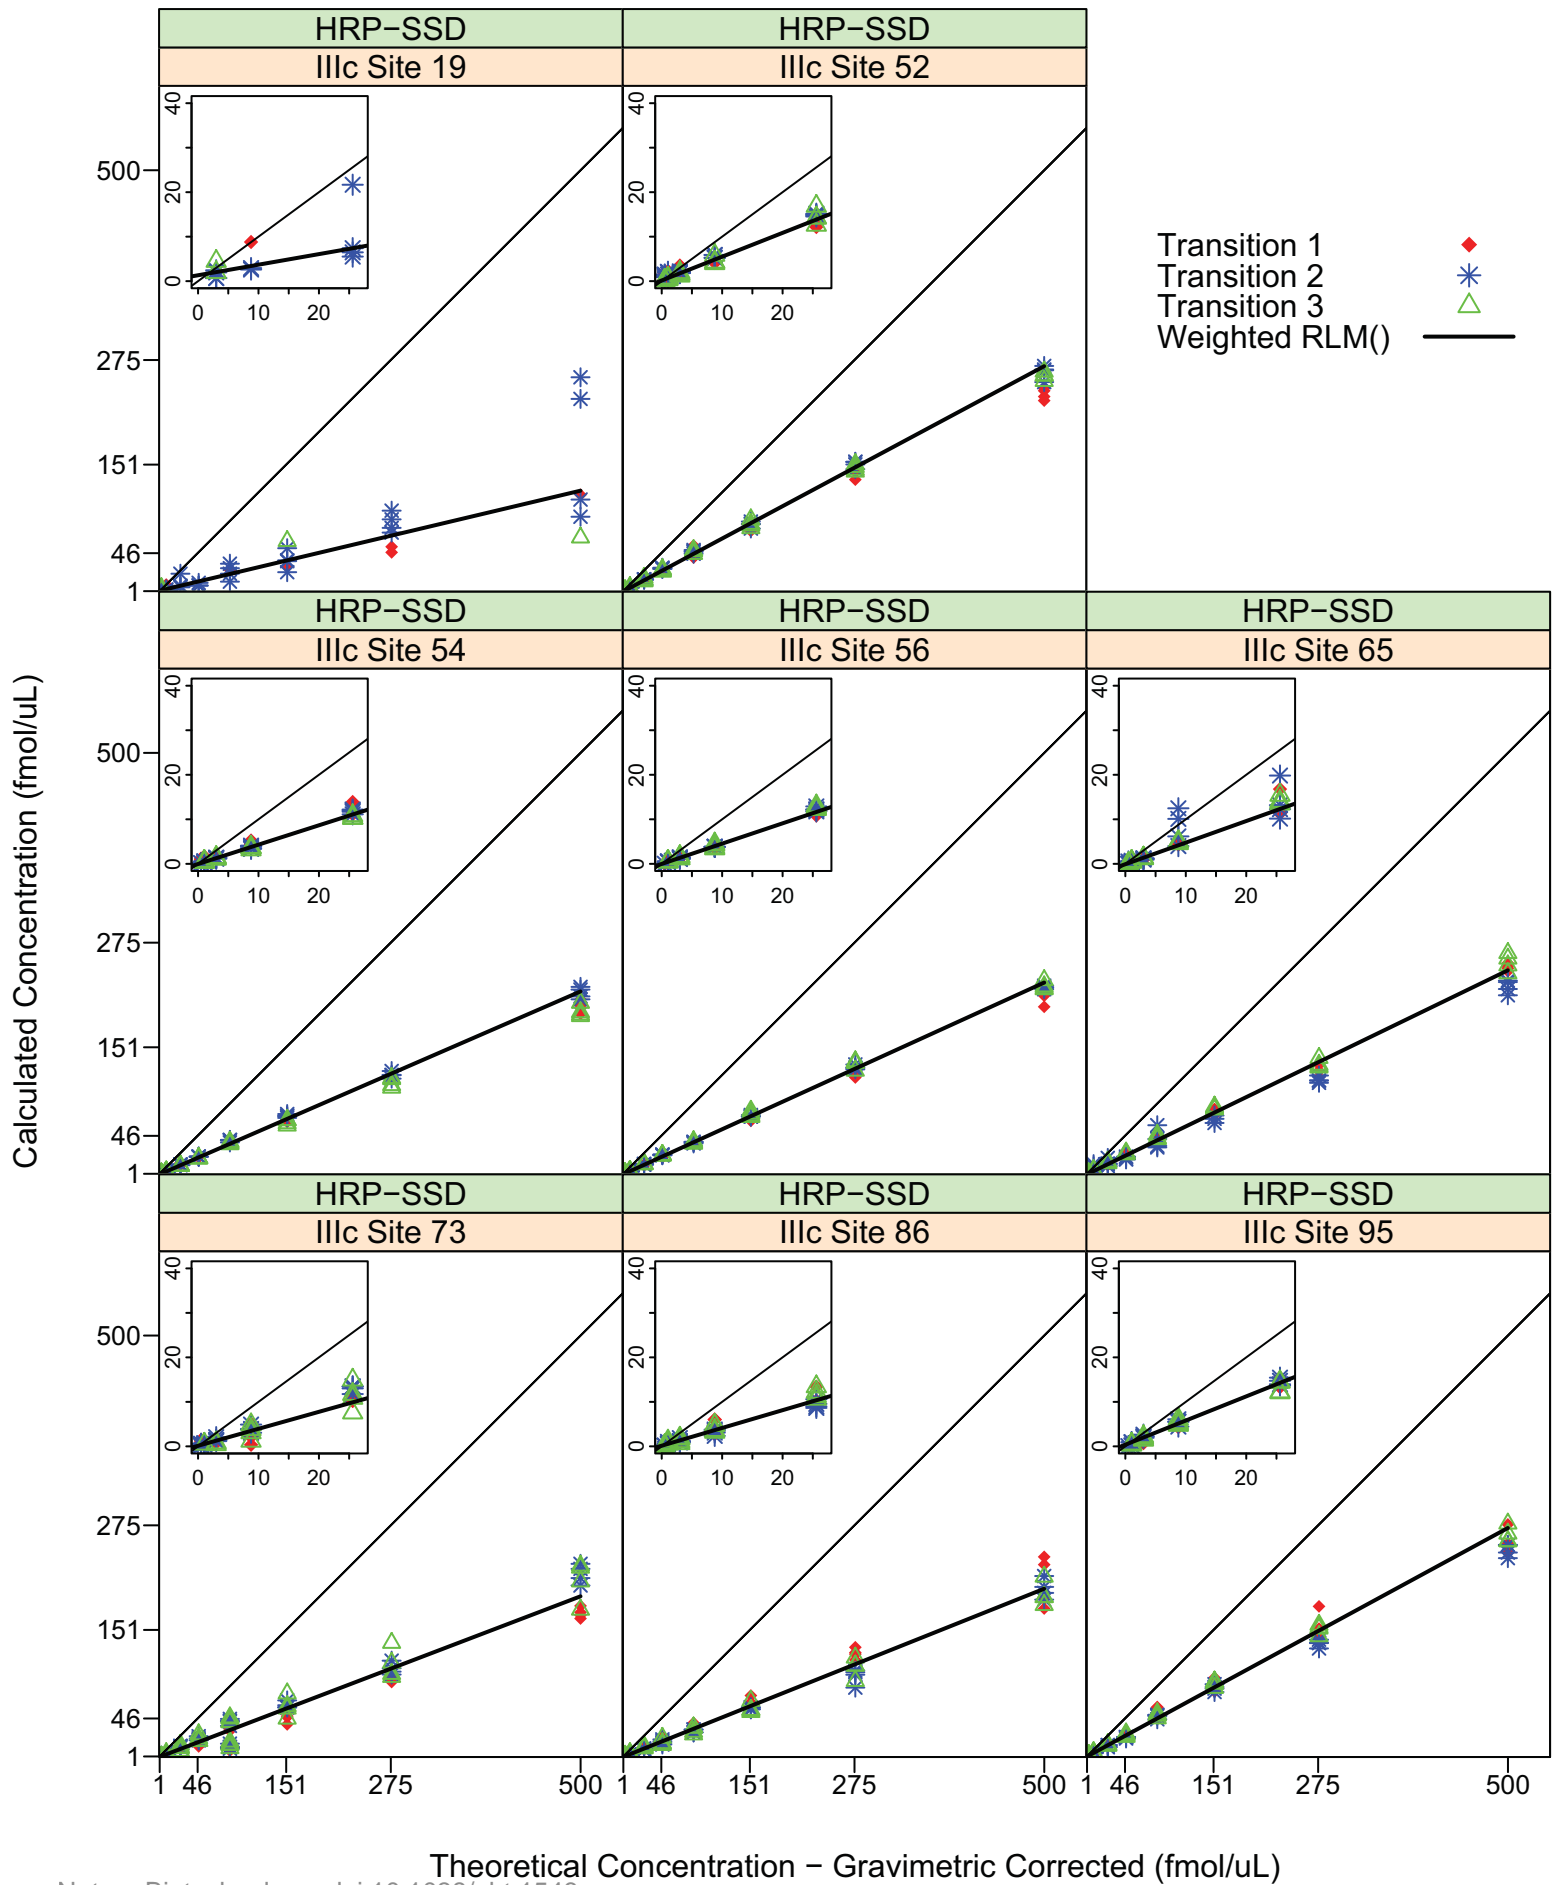

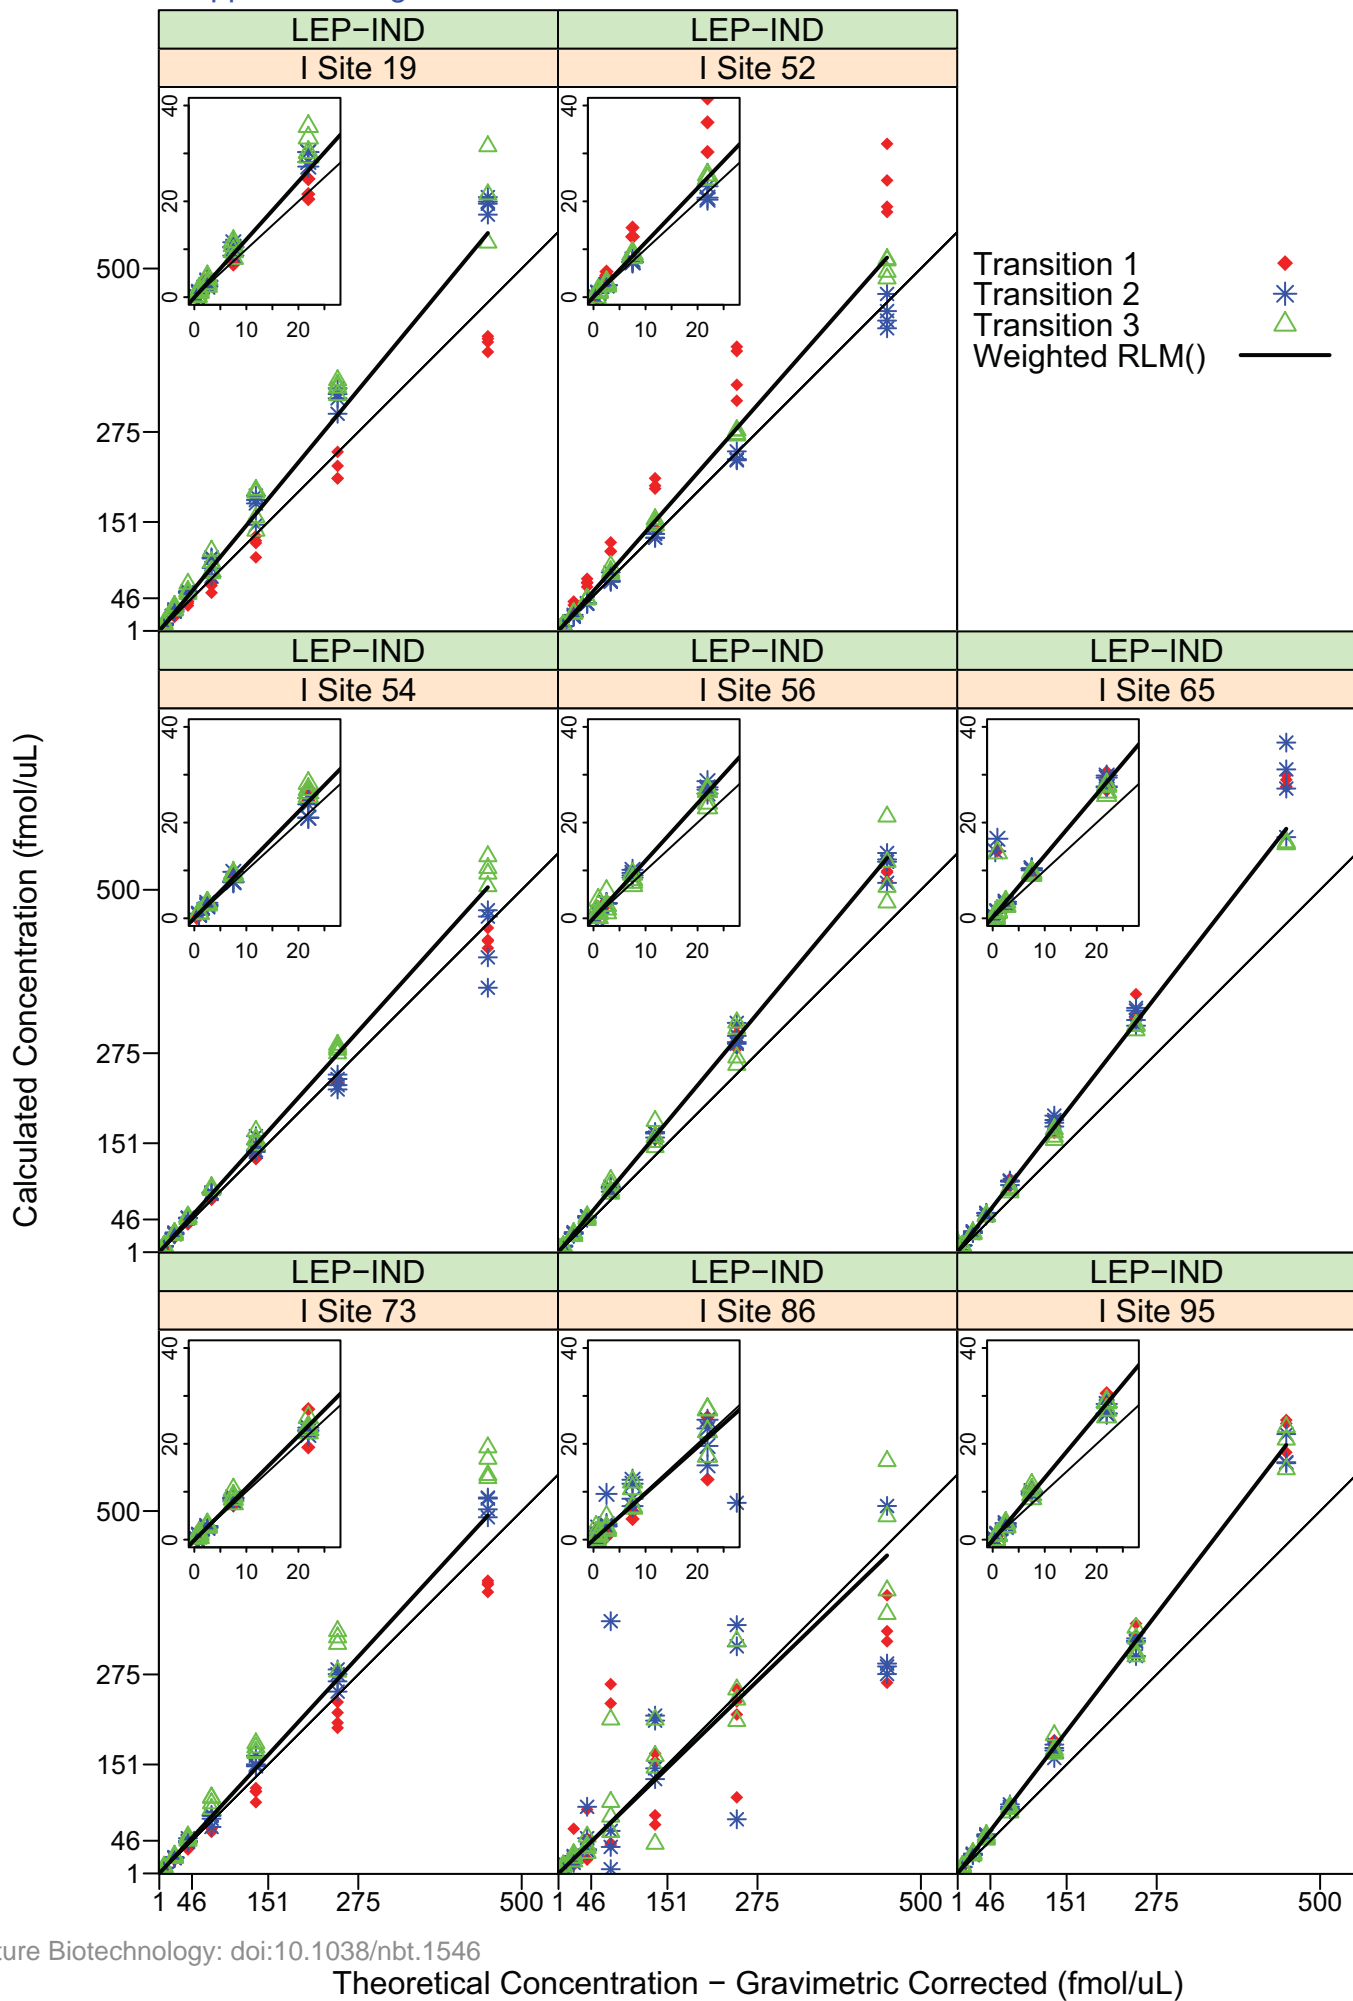

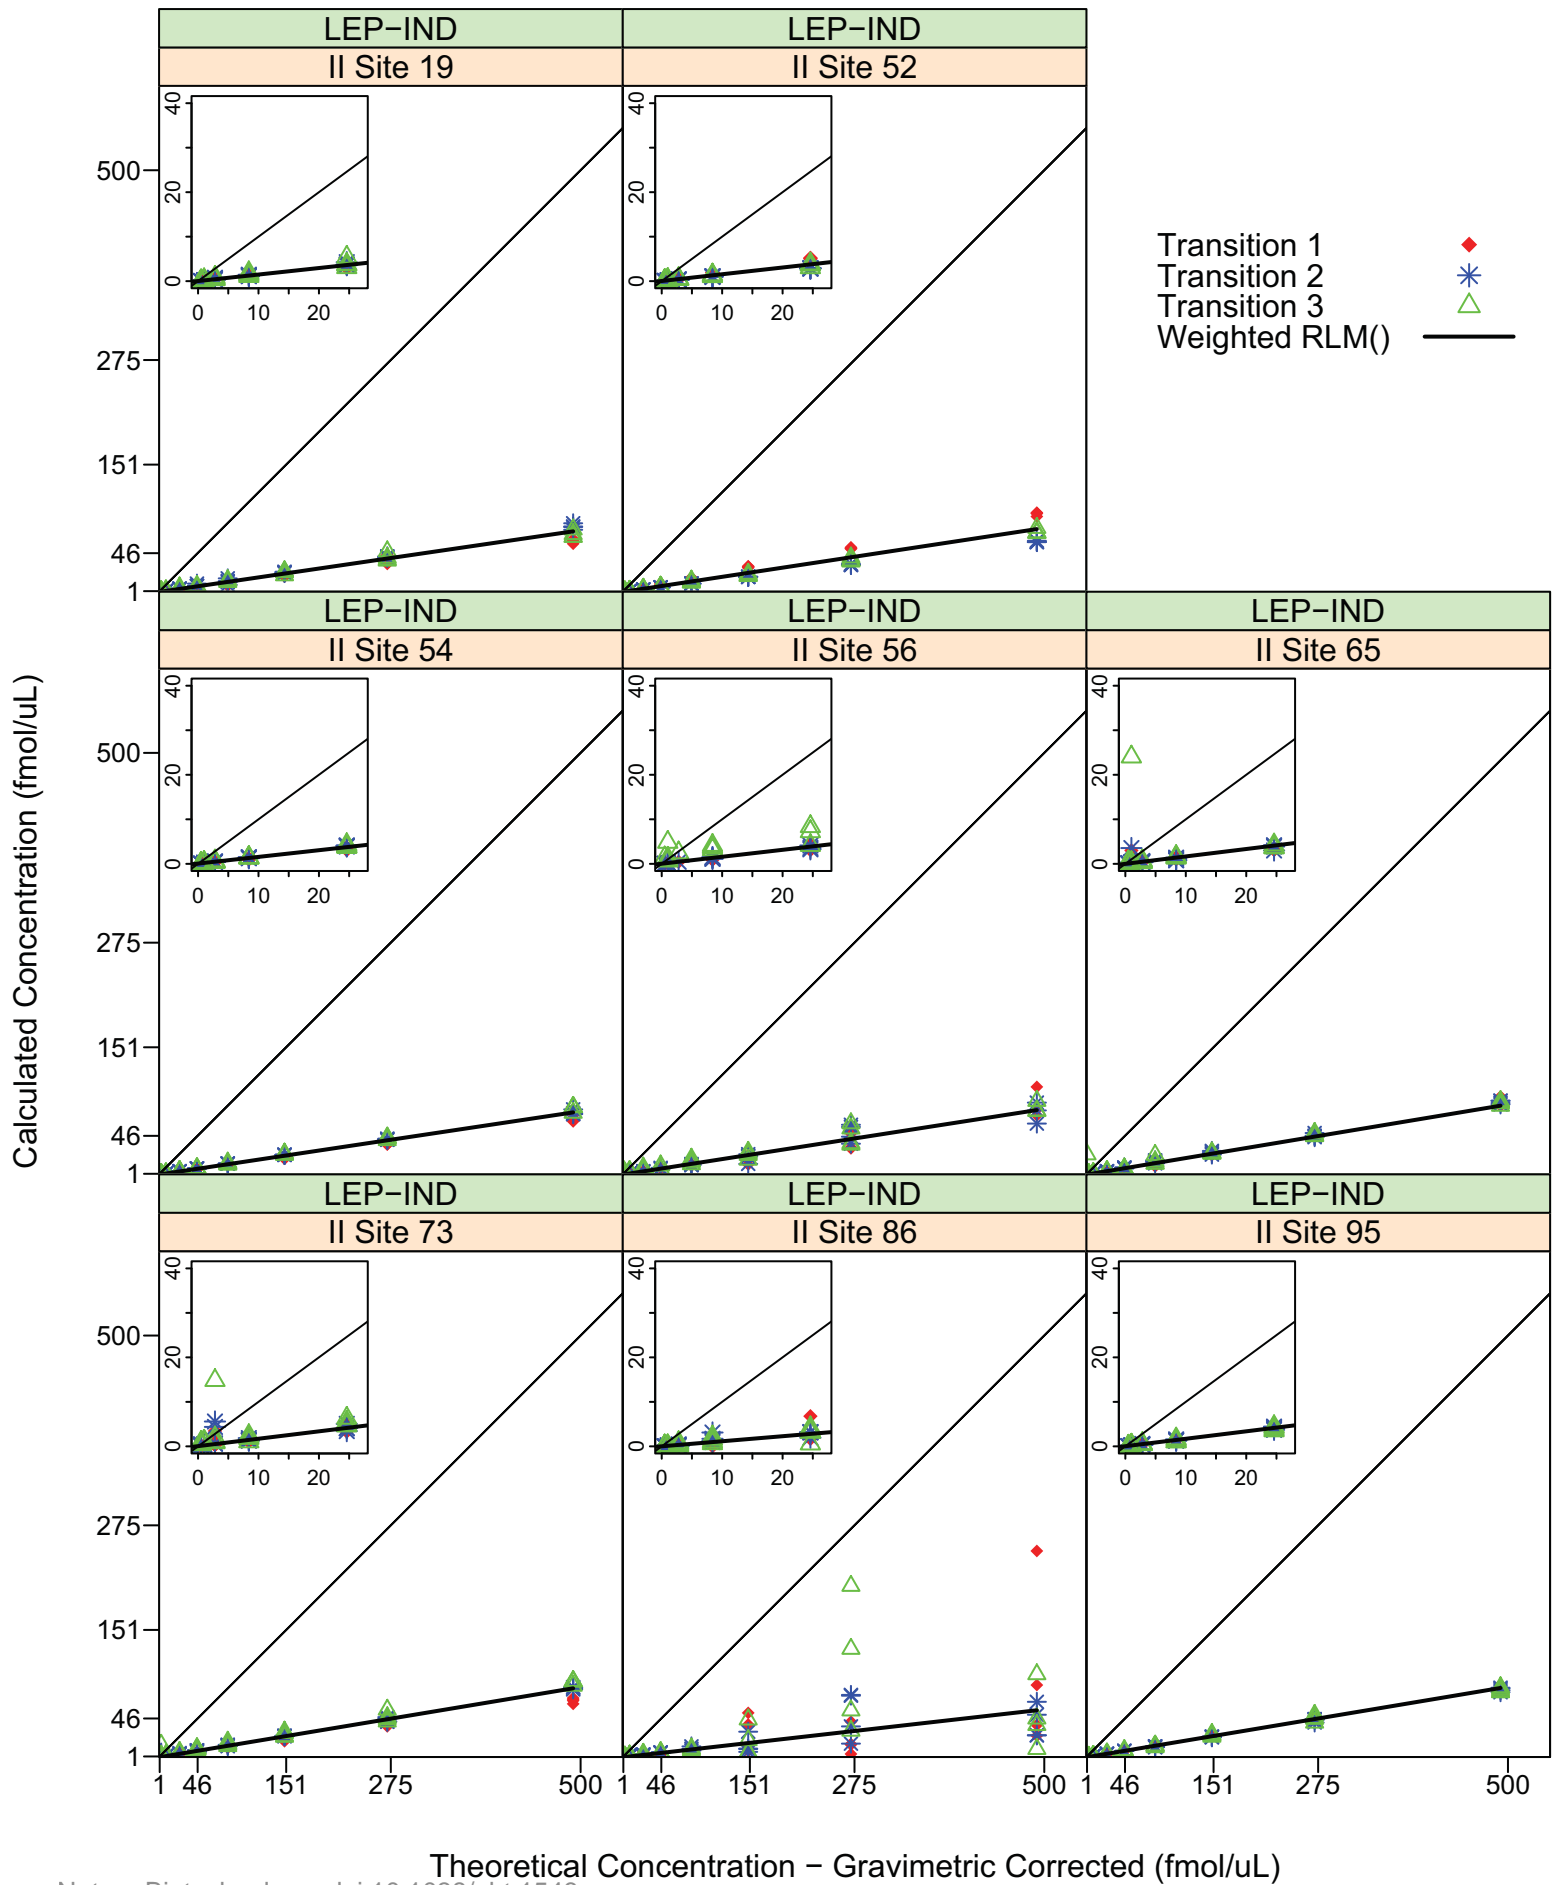

Theoretical Concentration - Gravimetric Corrected (fmol/uL)

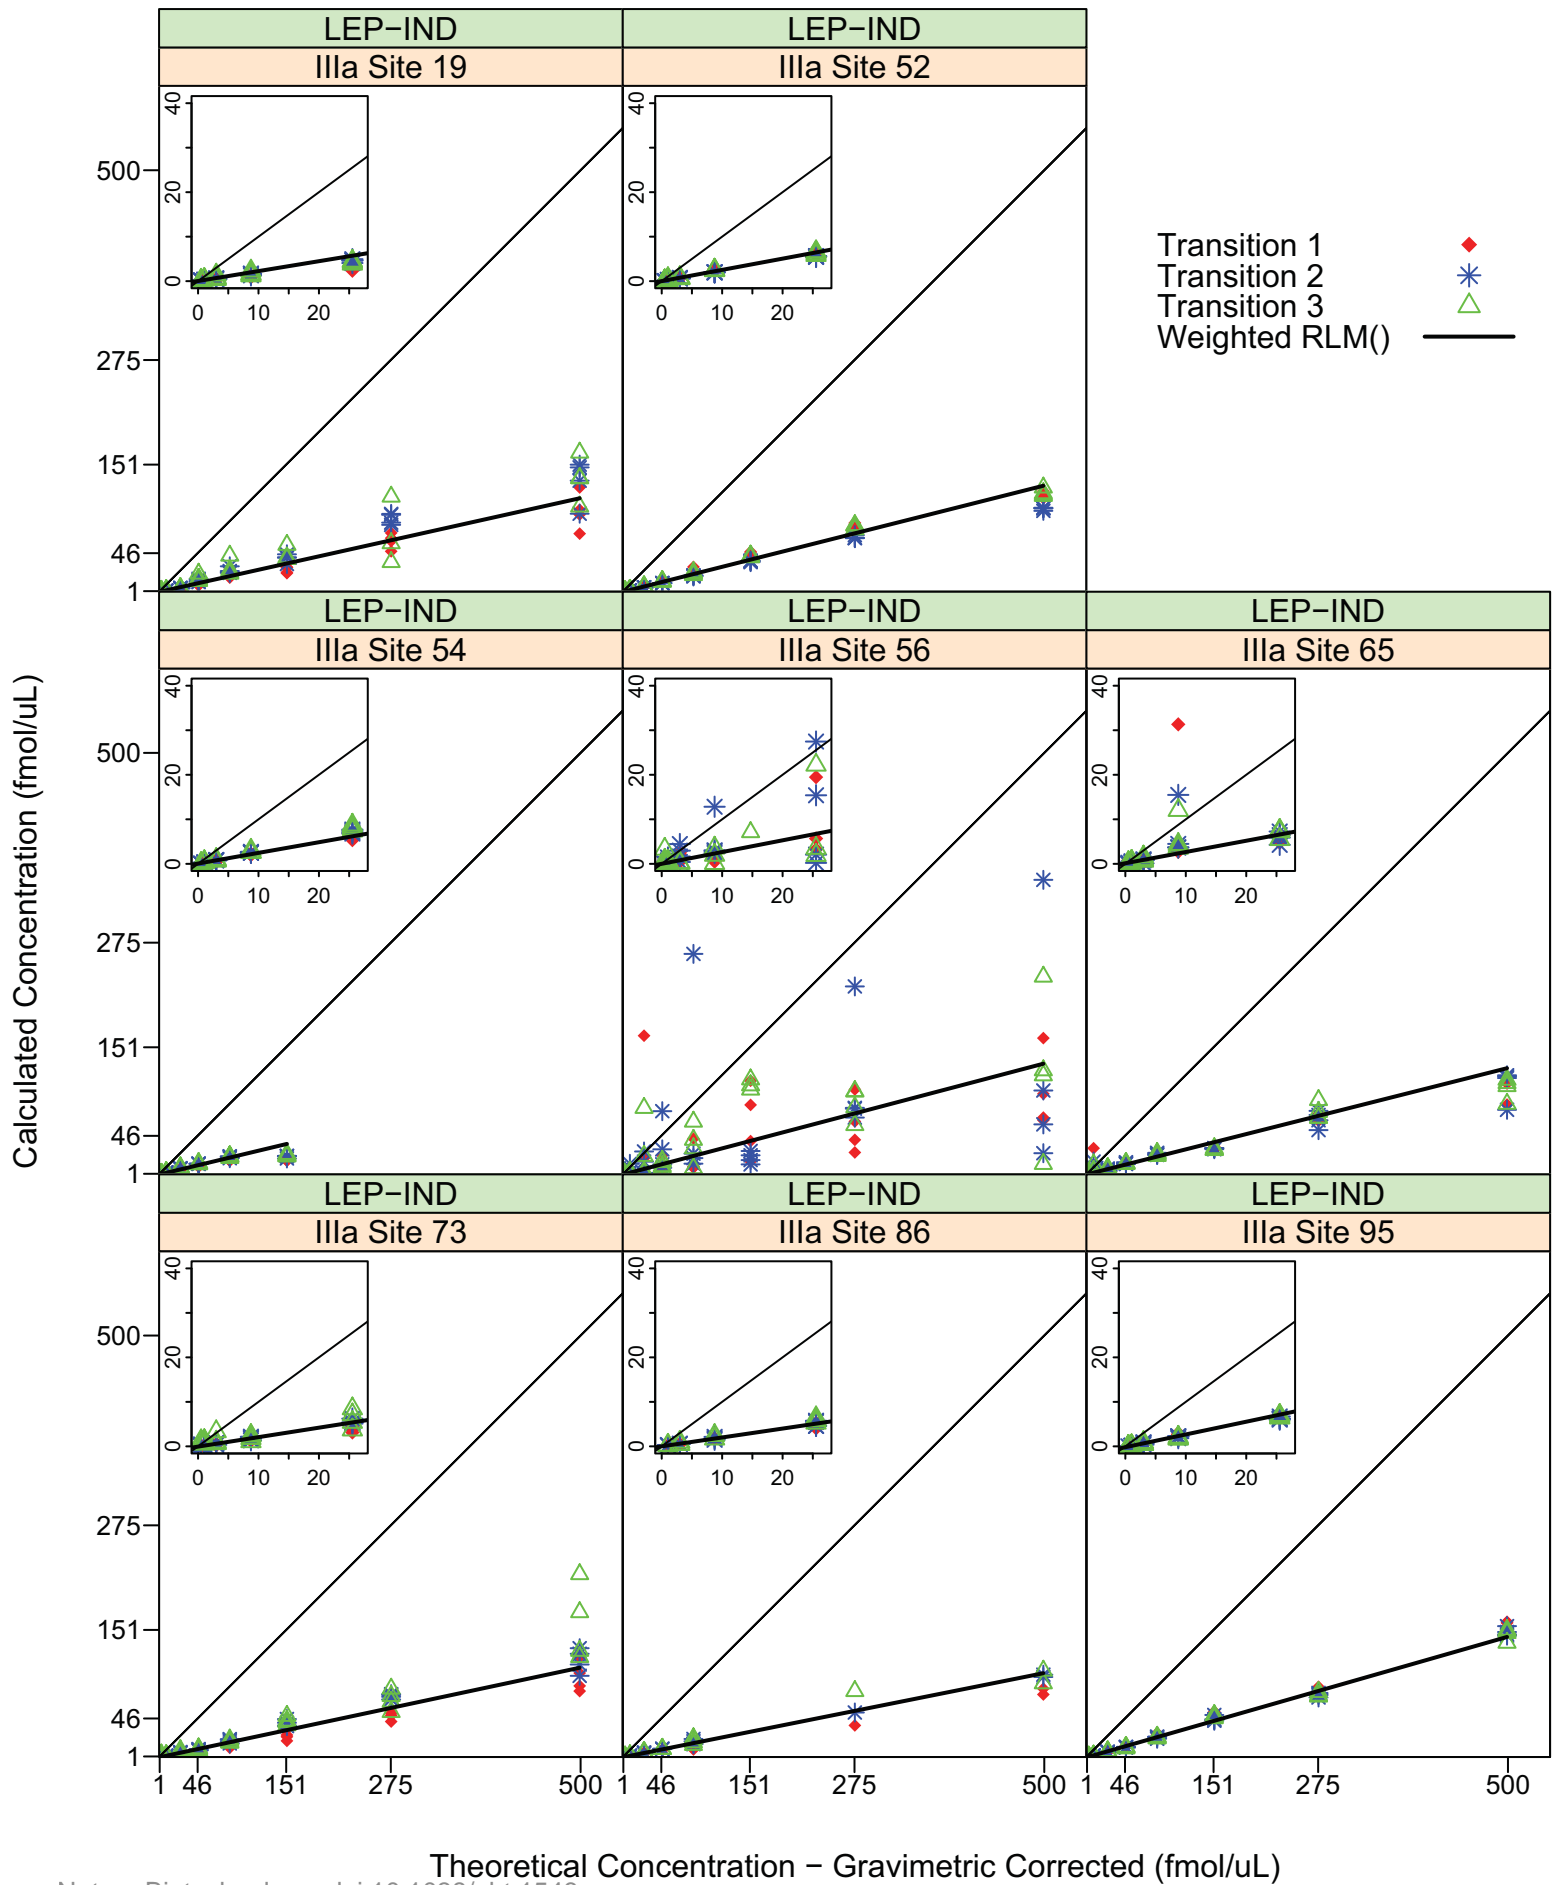

Theoretical Concentration - Gravimetric Corrected (fmol/uL)



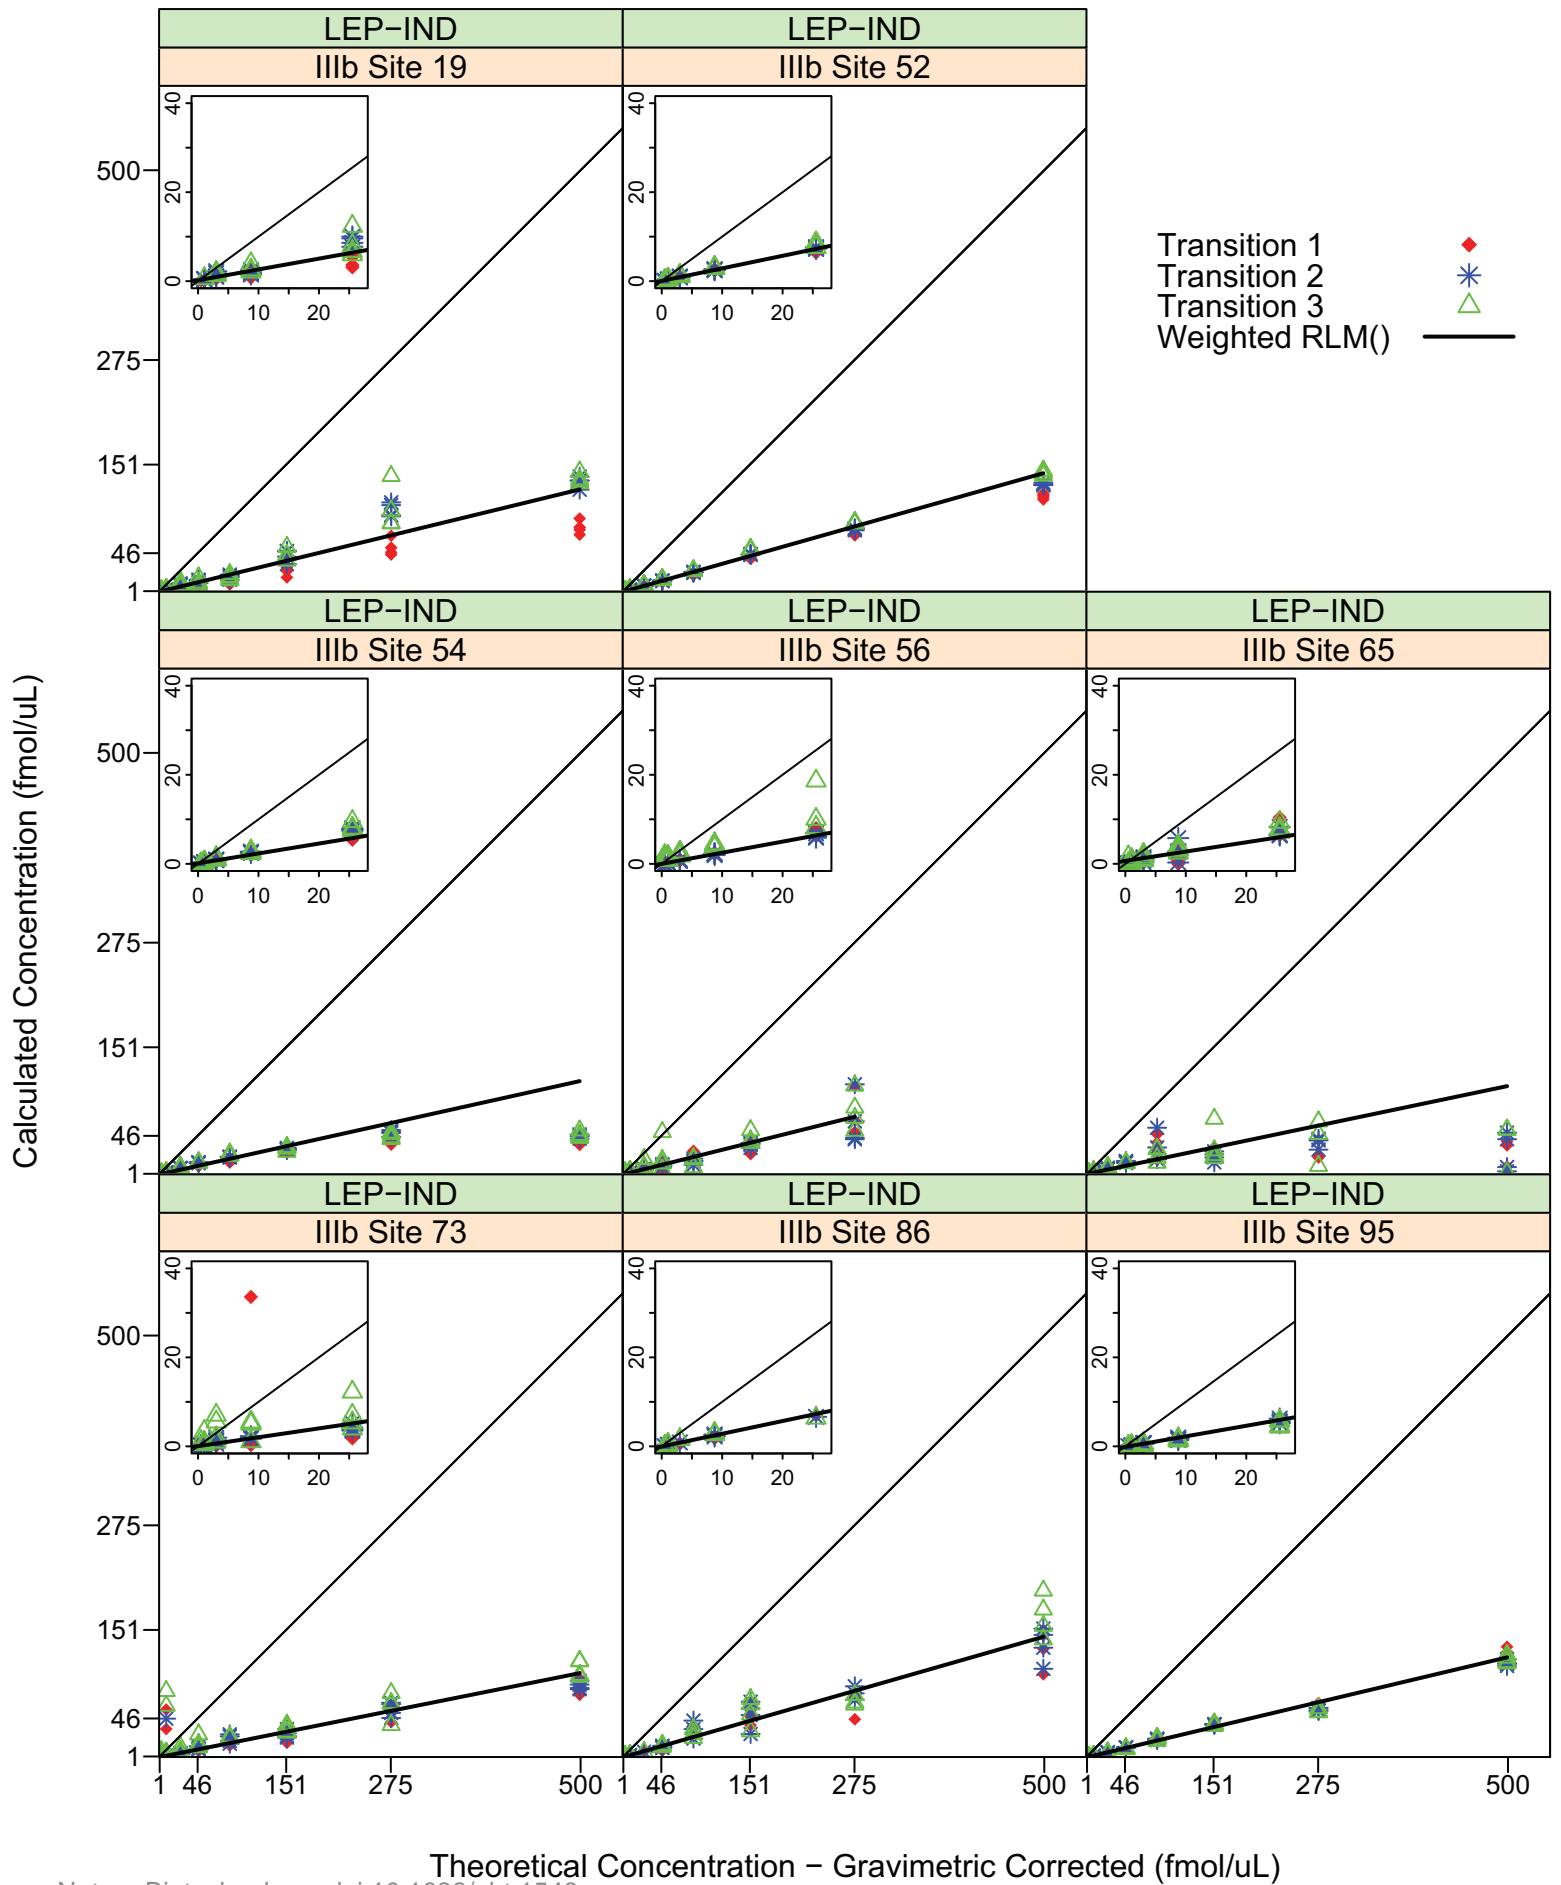

Theoretical Concentration - Gravimetric Corrected (fmol/uL)

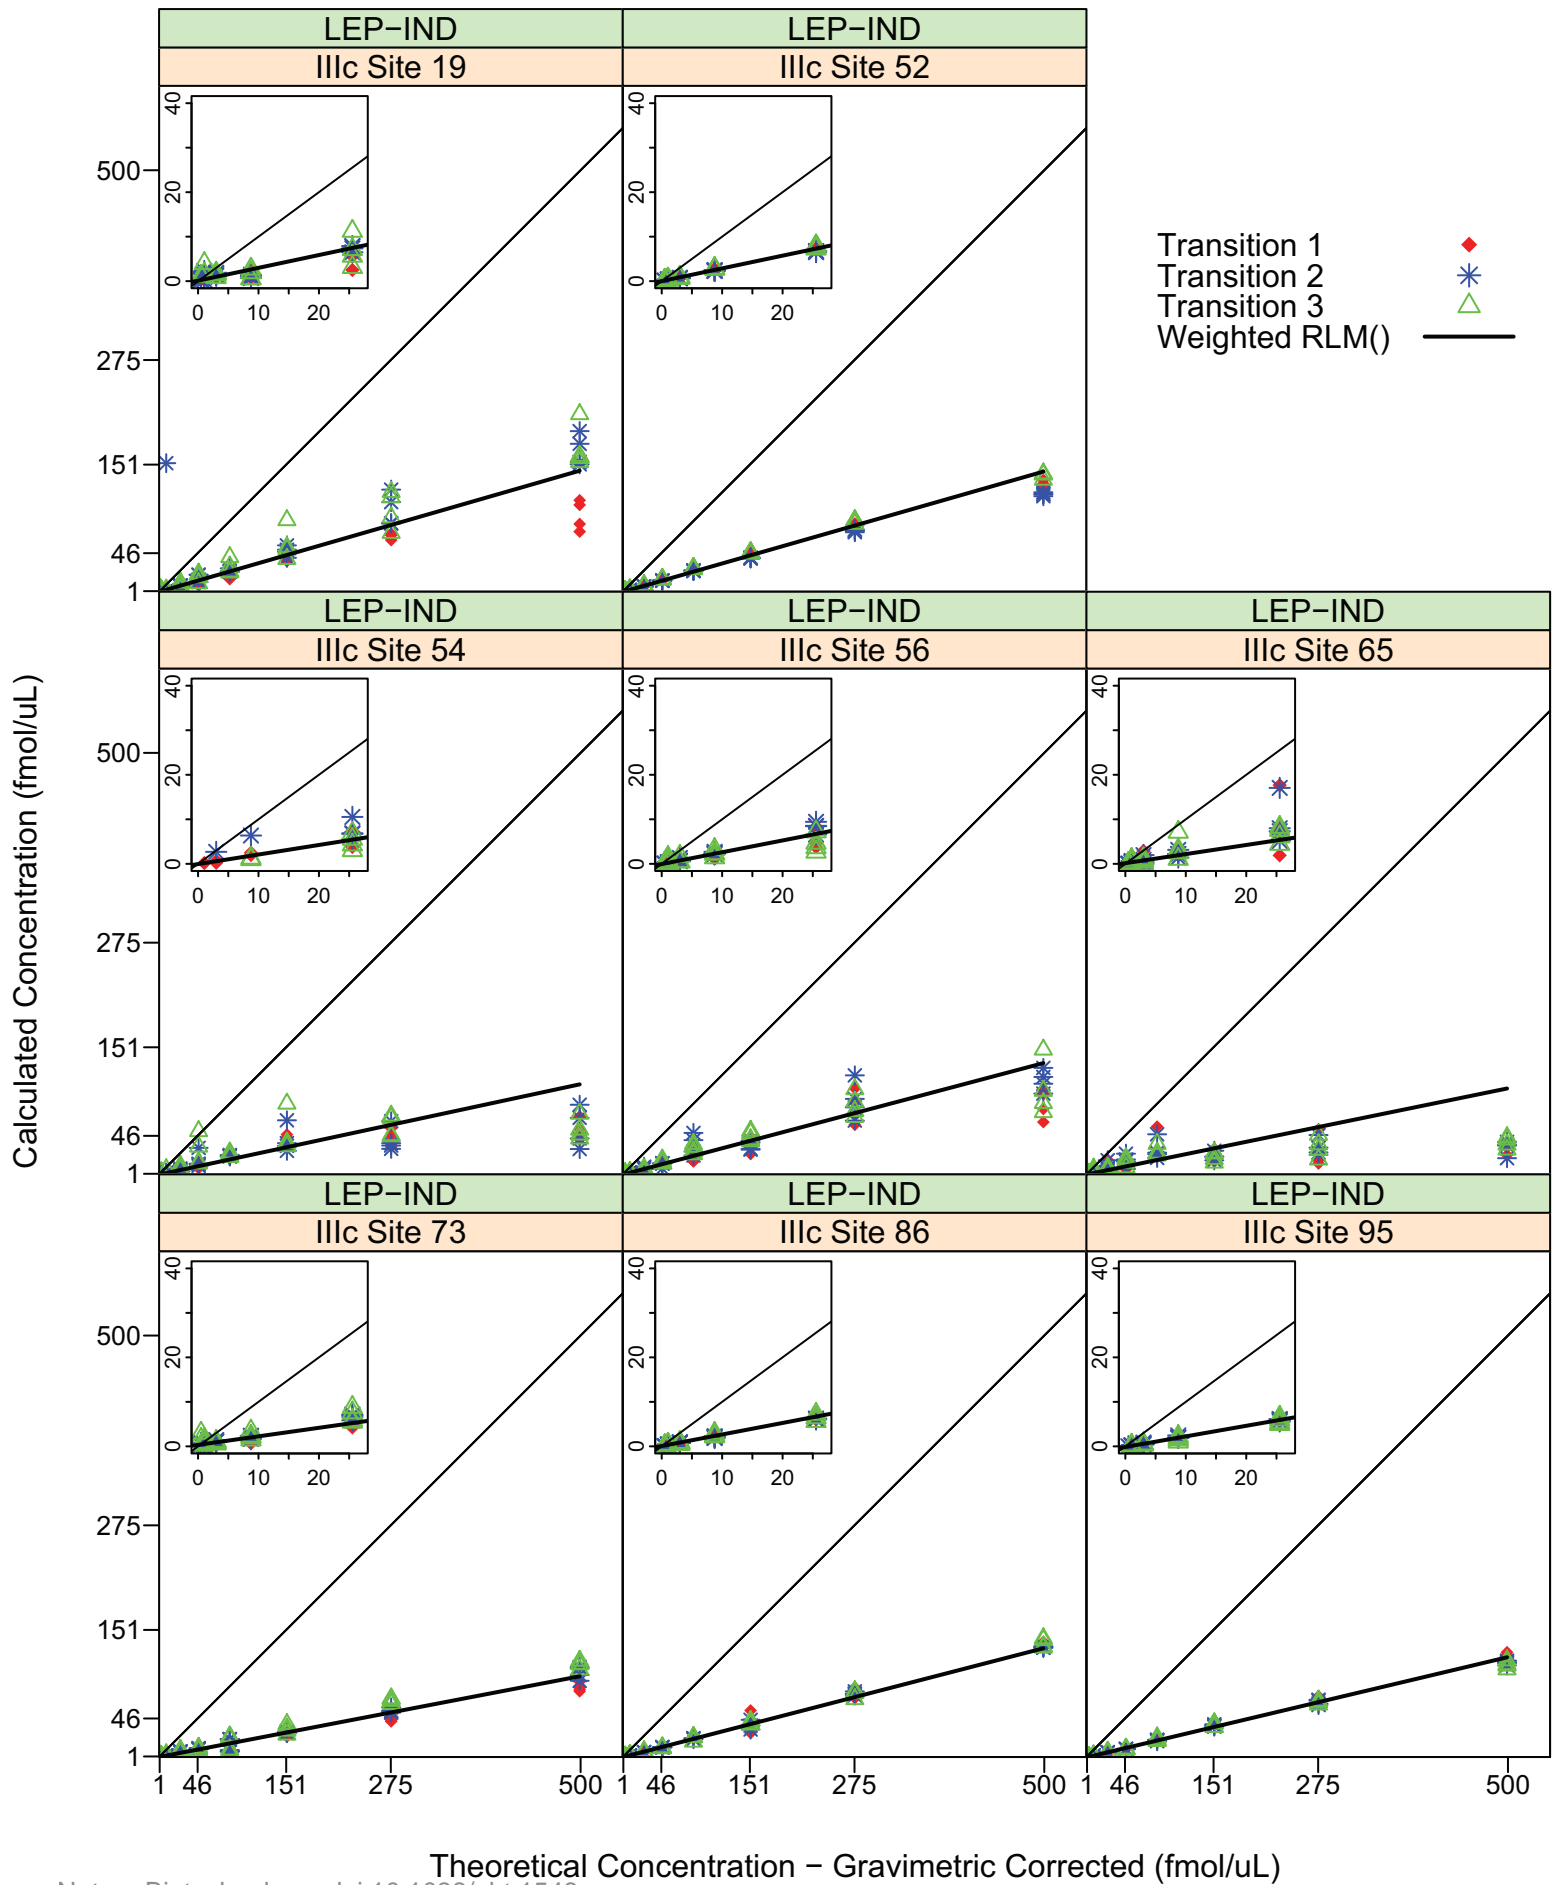

Theoretical Concentration - Gravimetric Corrected (fmol/uL)

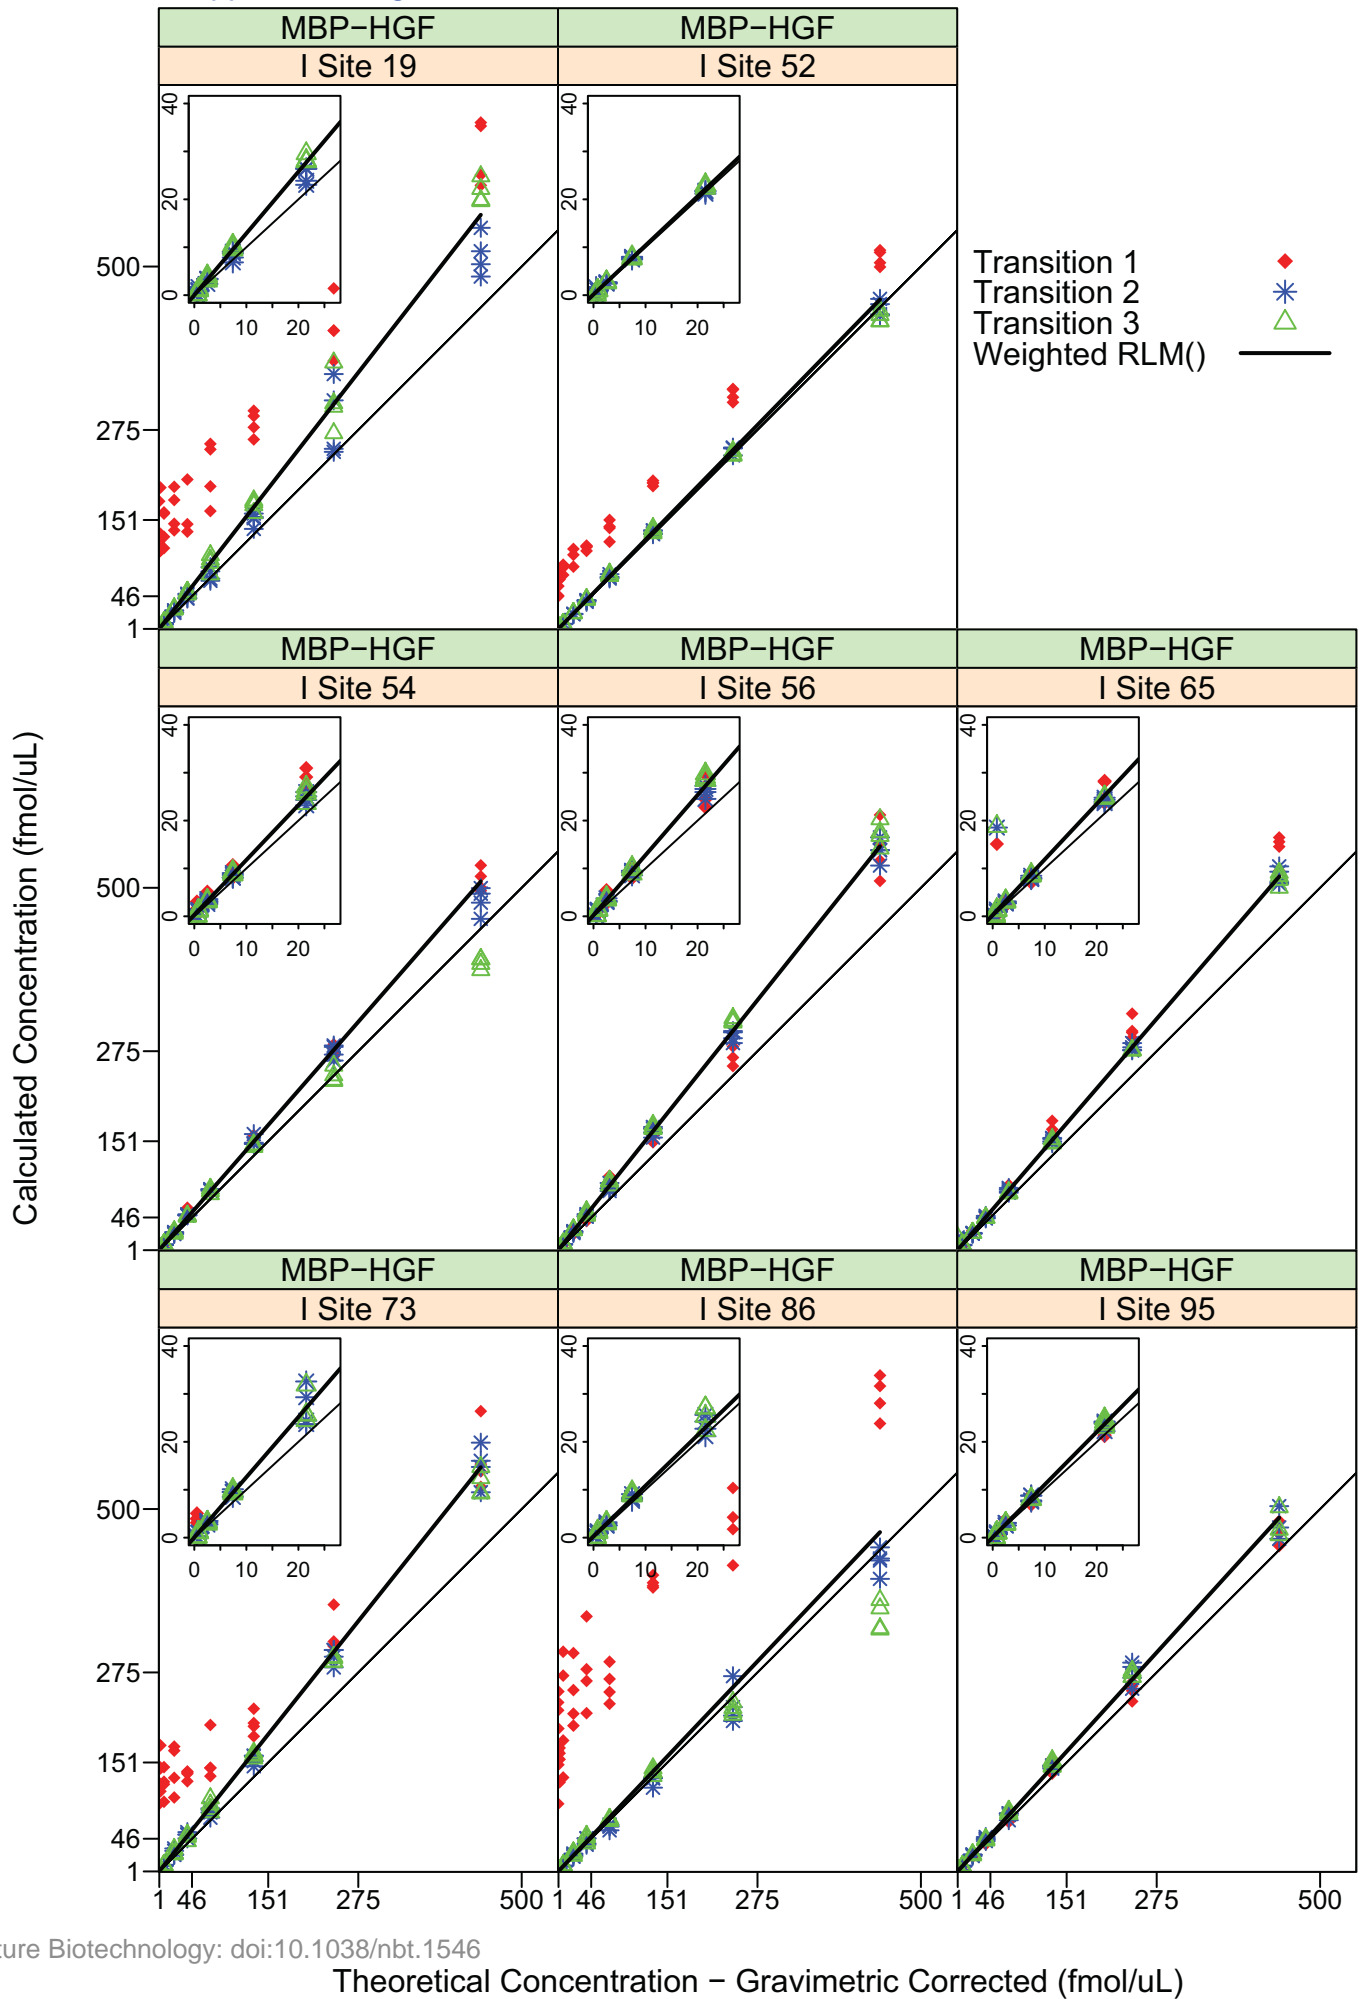

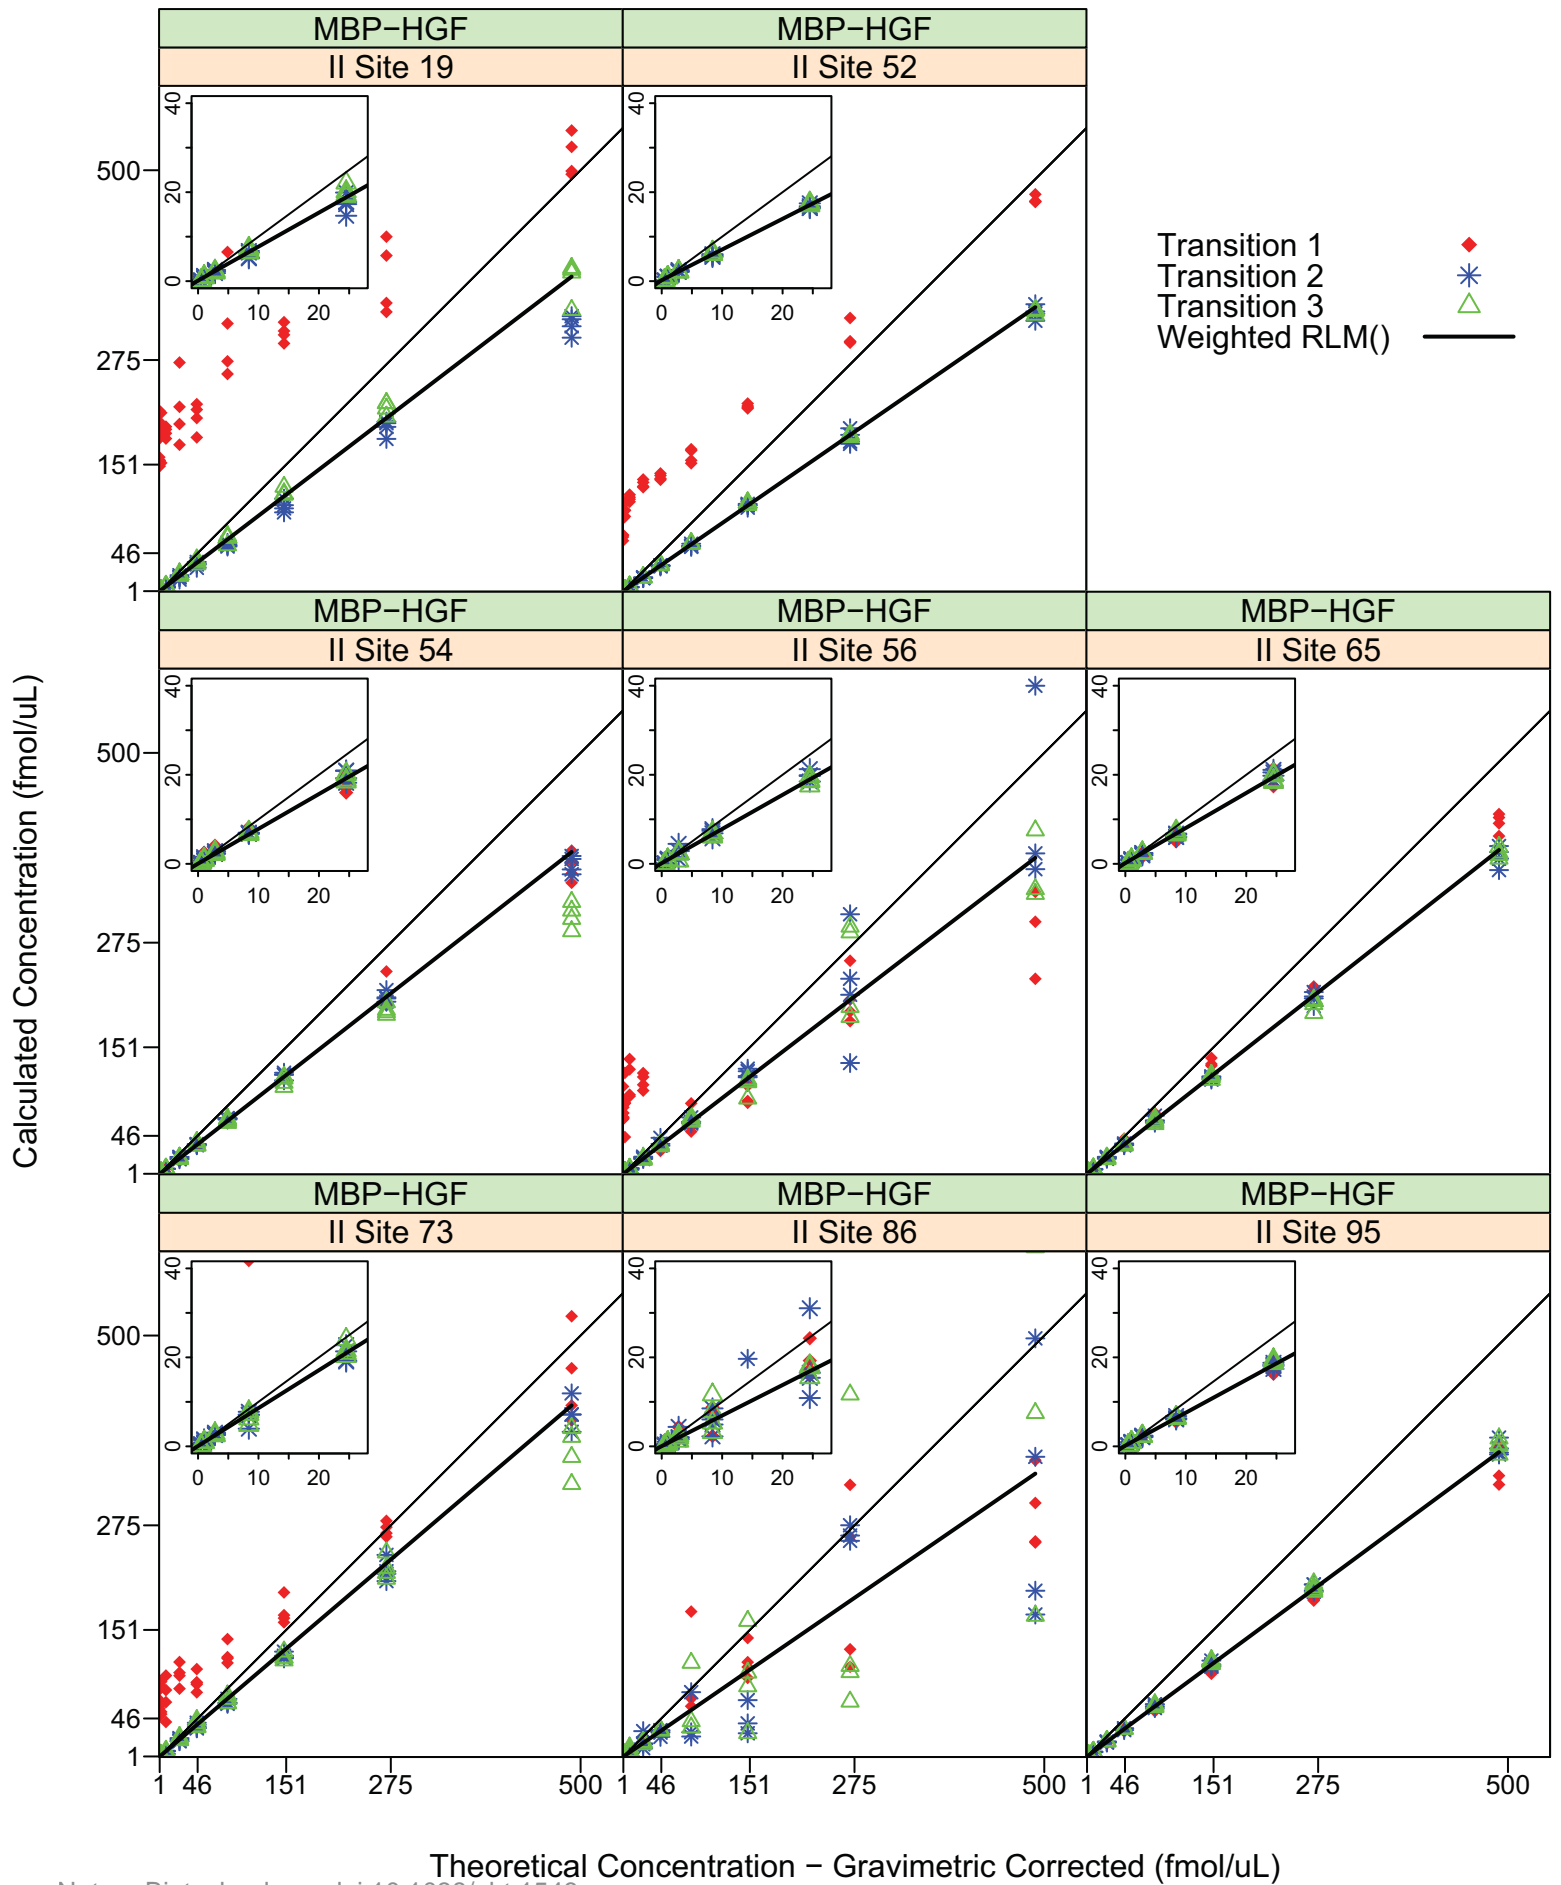

Theoretical Concentration - Gravimetric Corrected (fmol/uL)

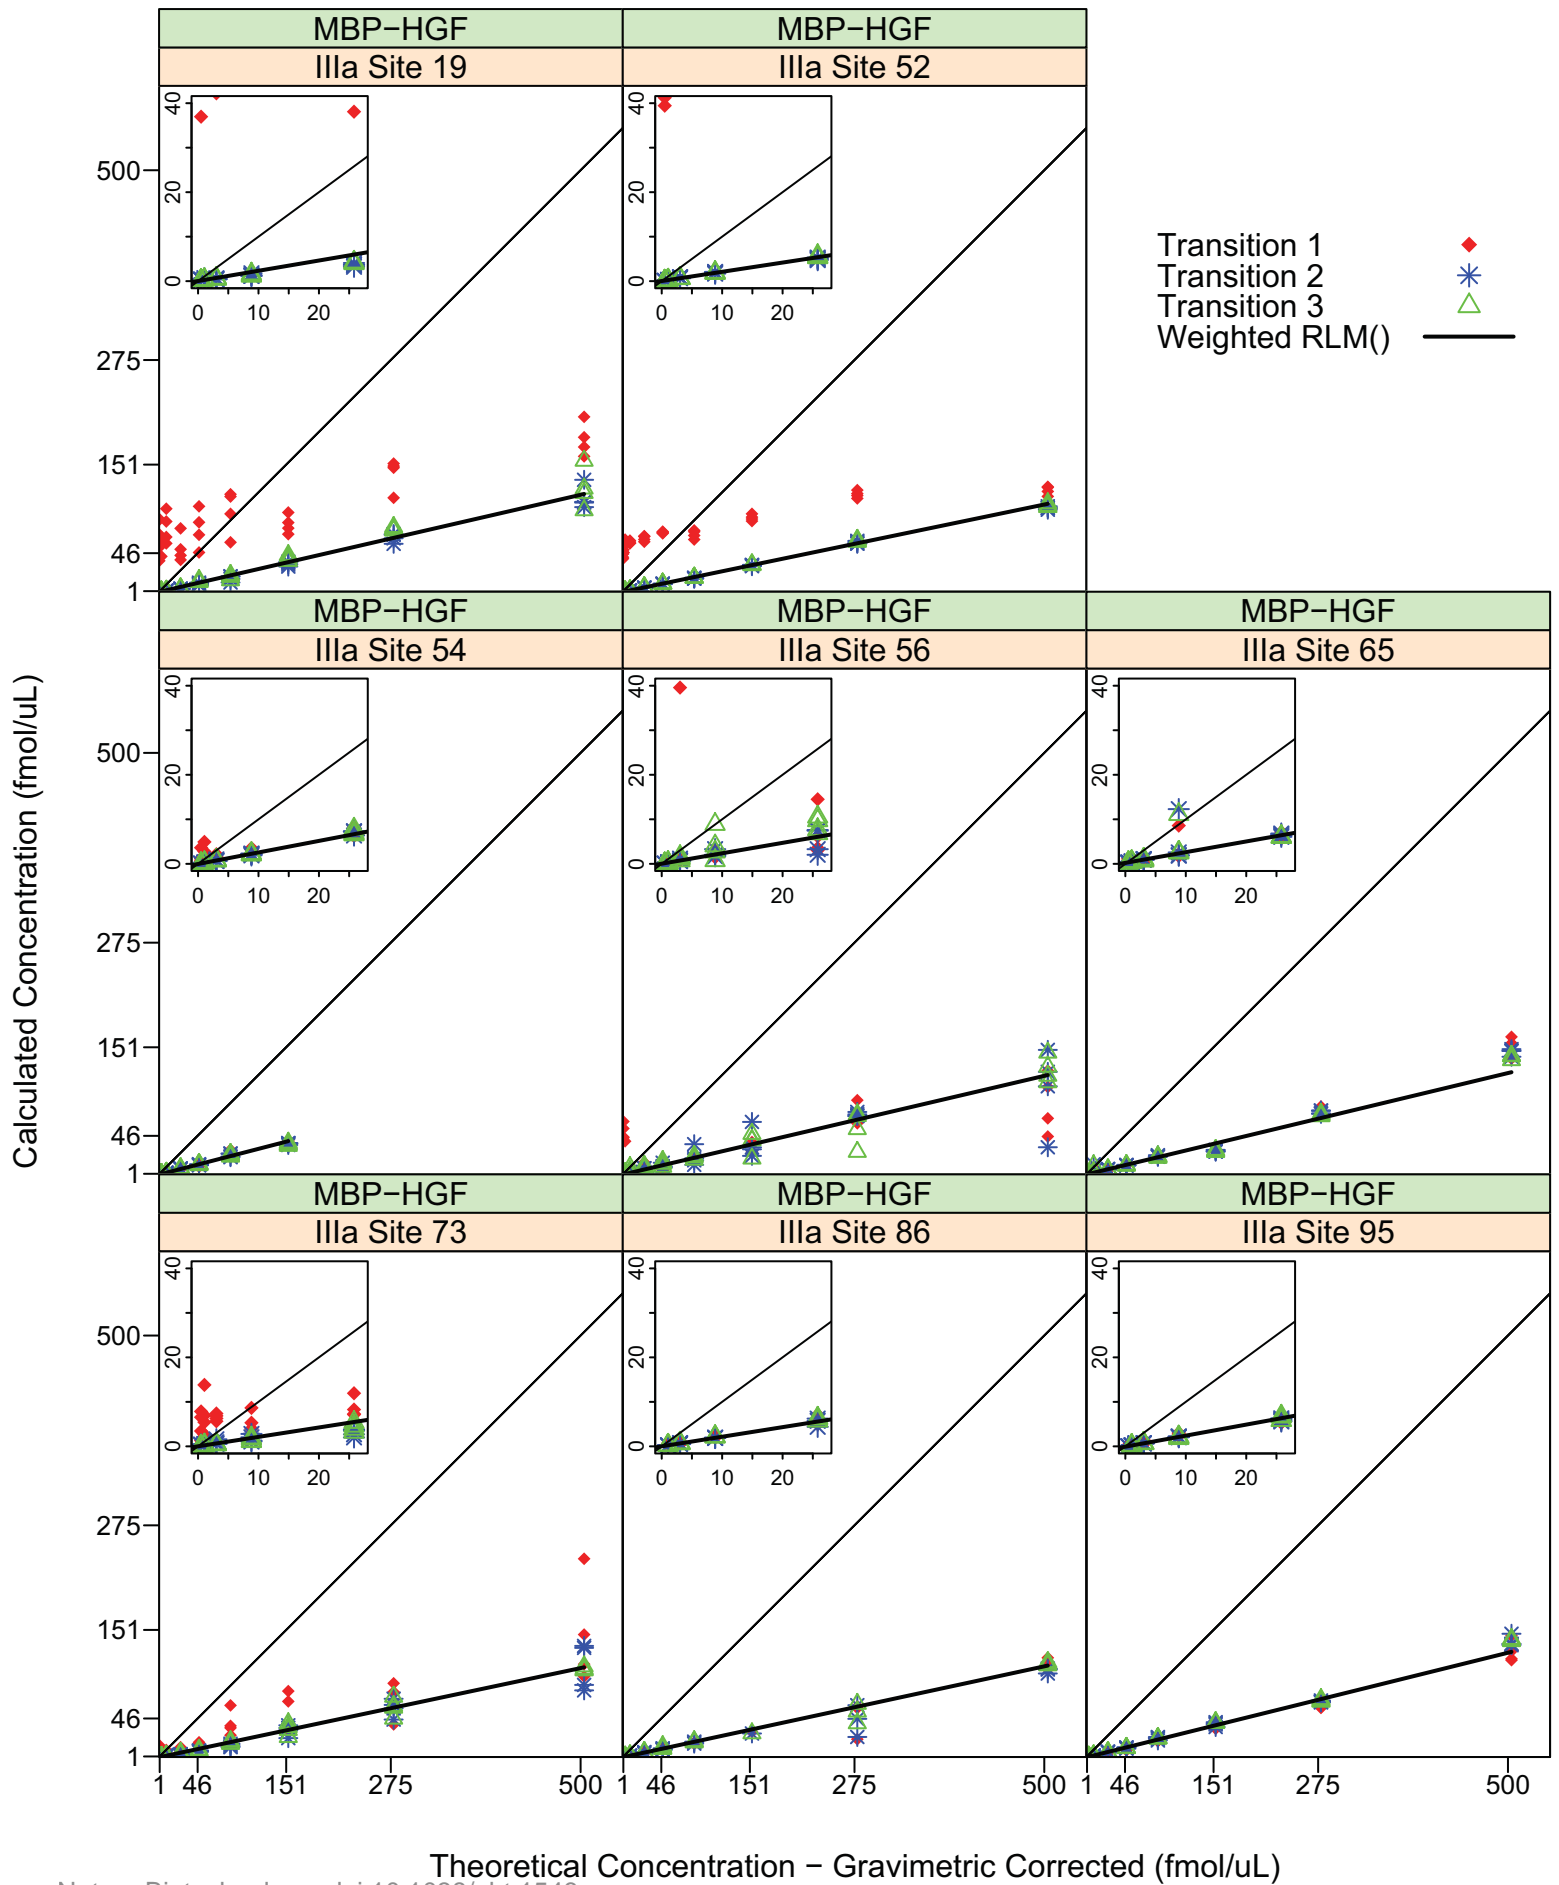

Theoretical Concentration - Gravimetric Corrected (fmol/uL)

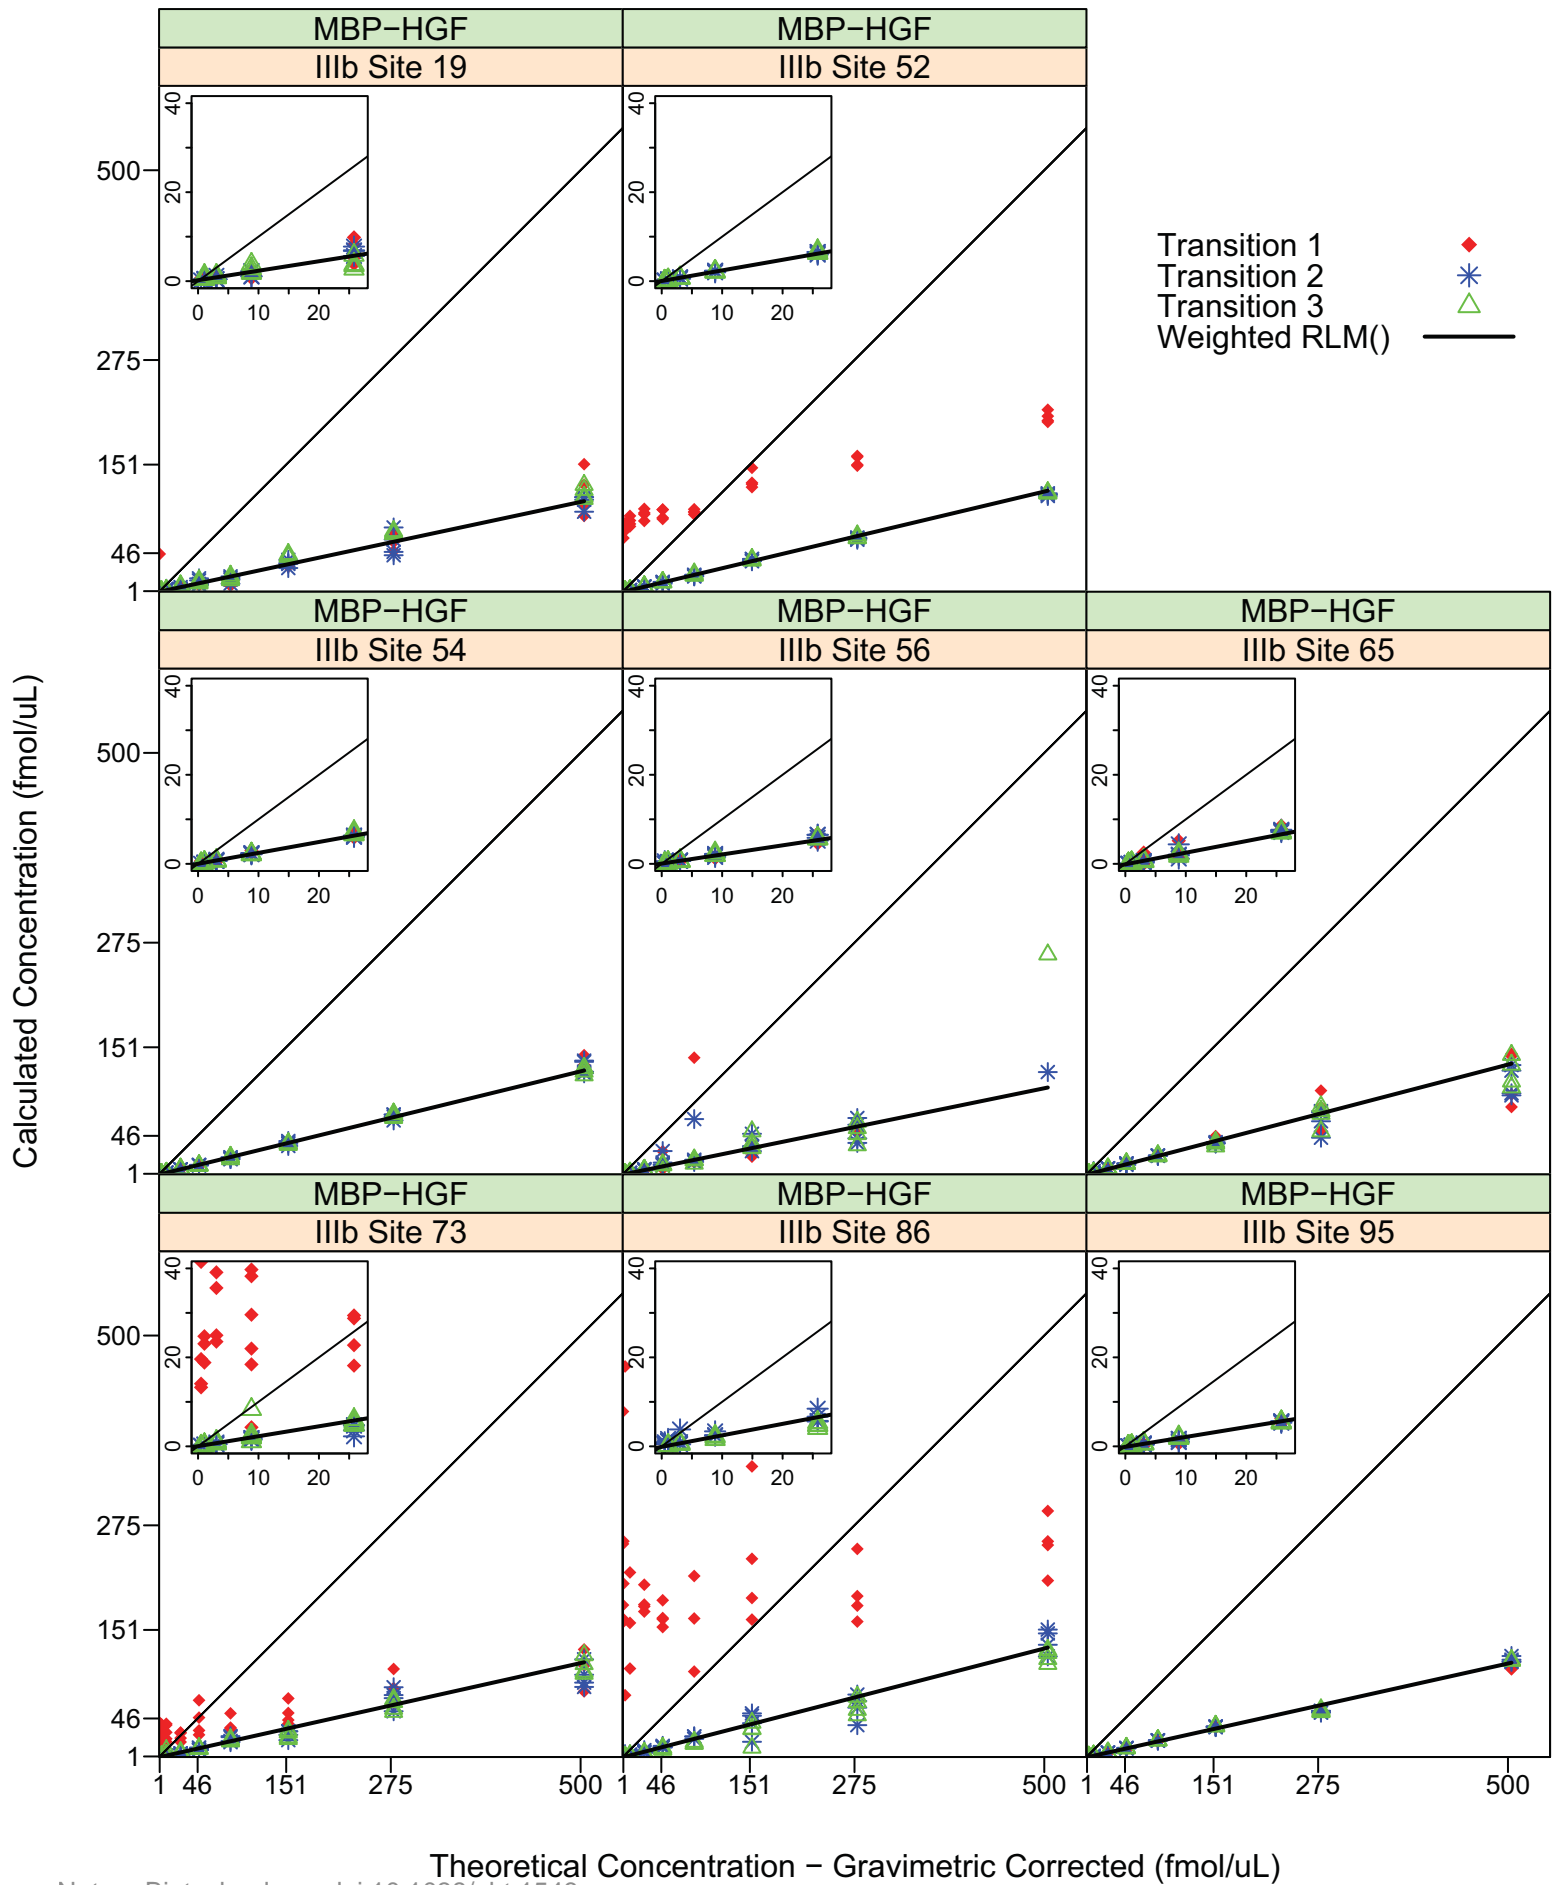

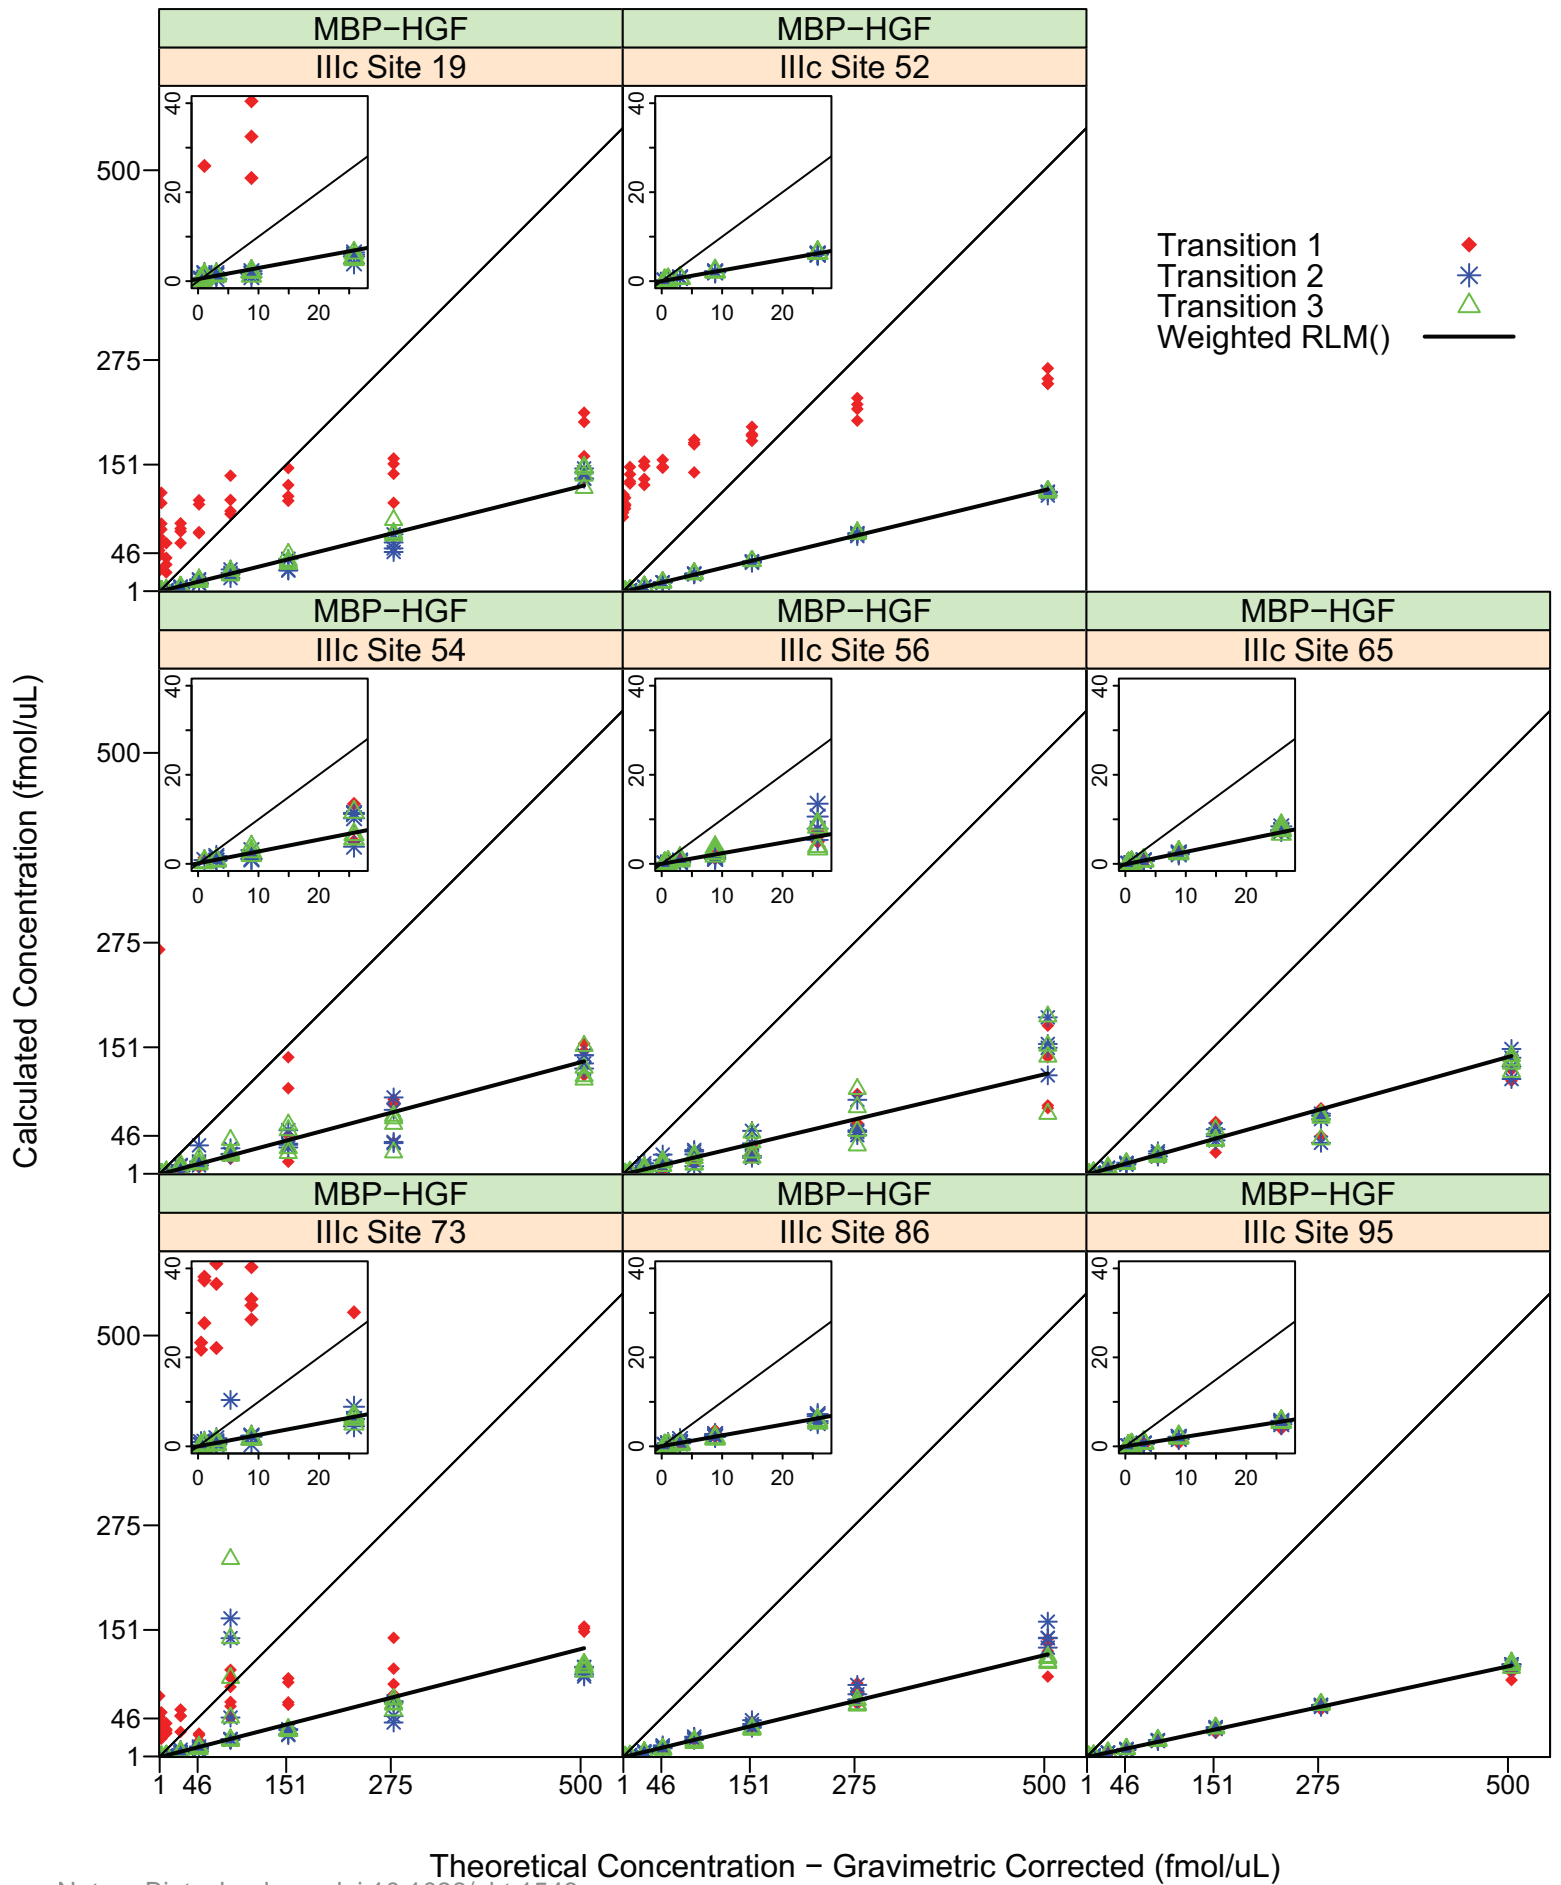

Theoretical Concentration - Gravimetric Corrected (fmol/uL)

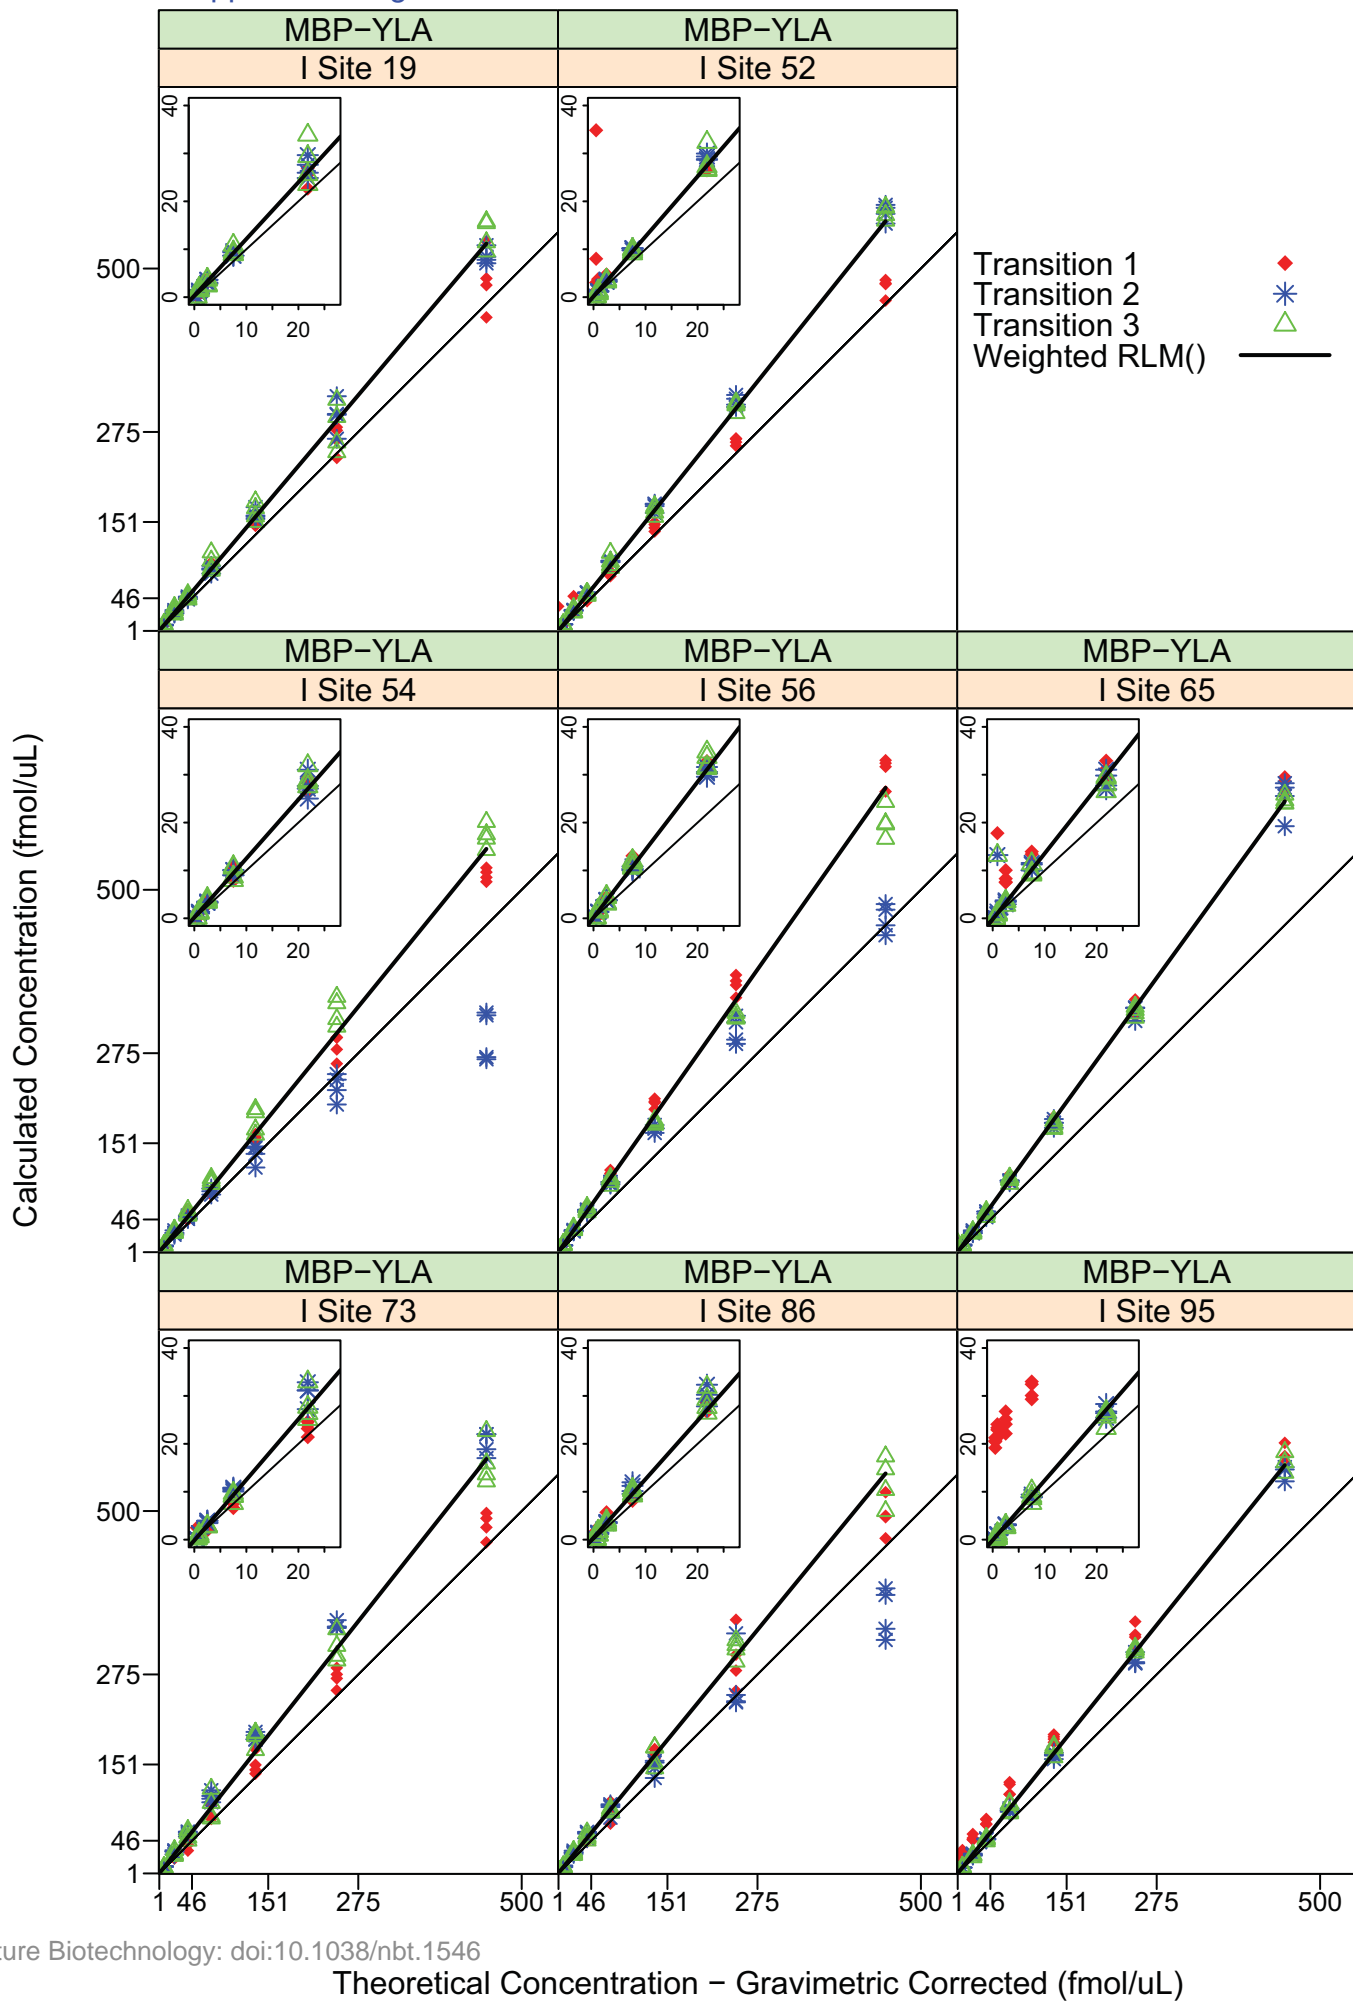



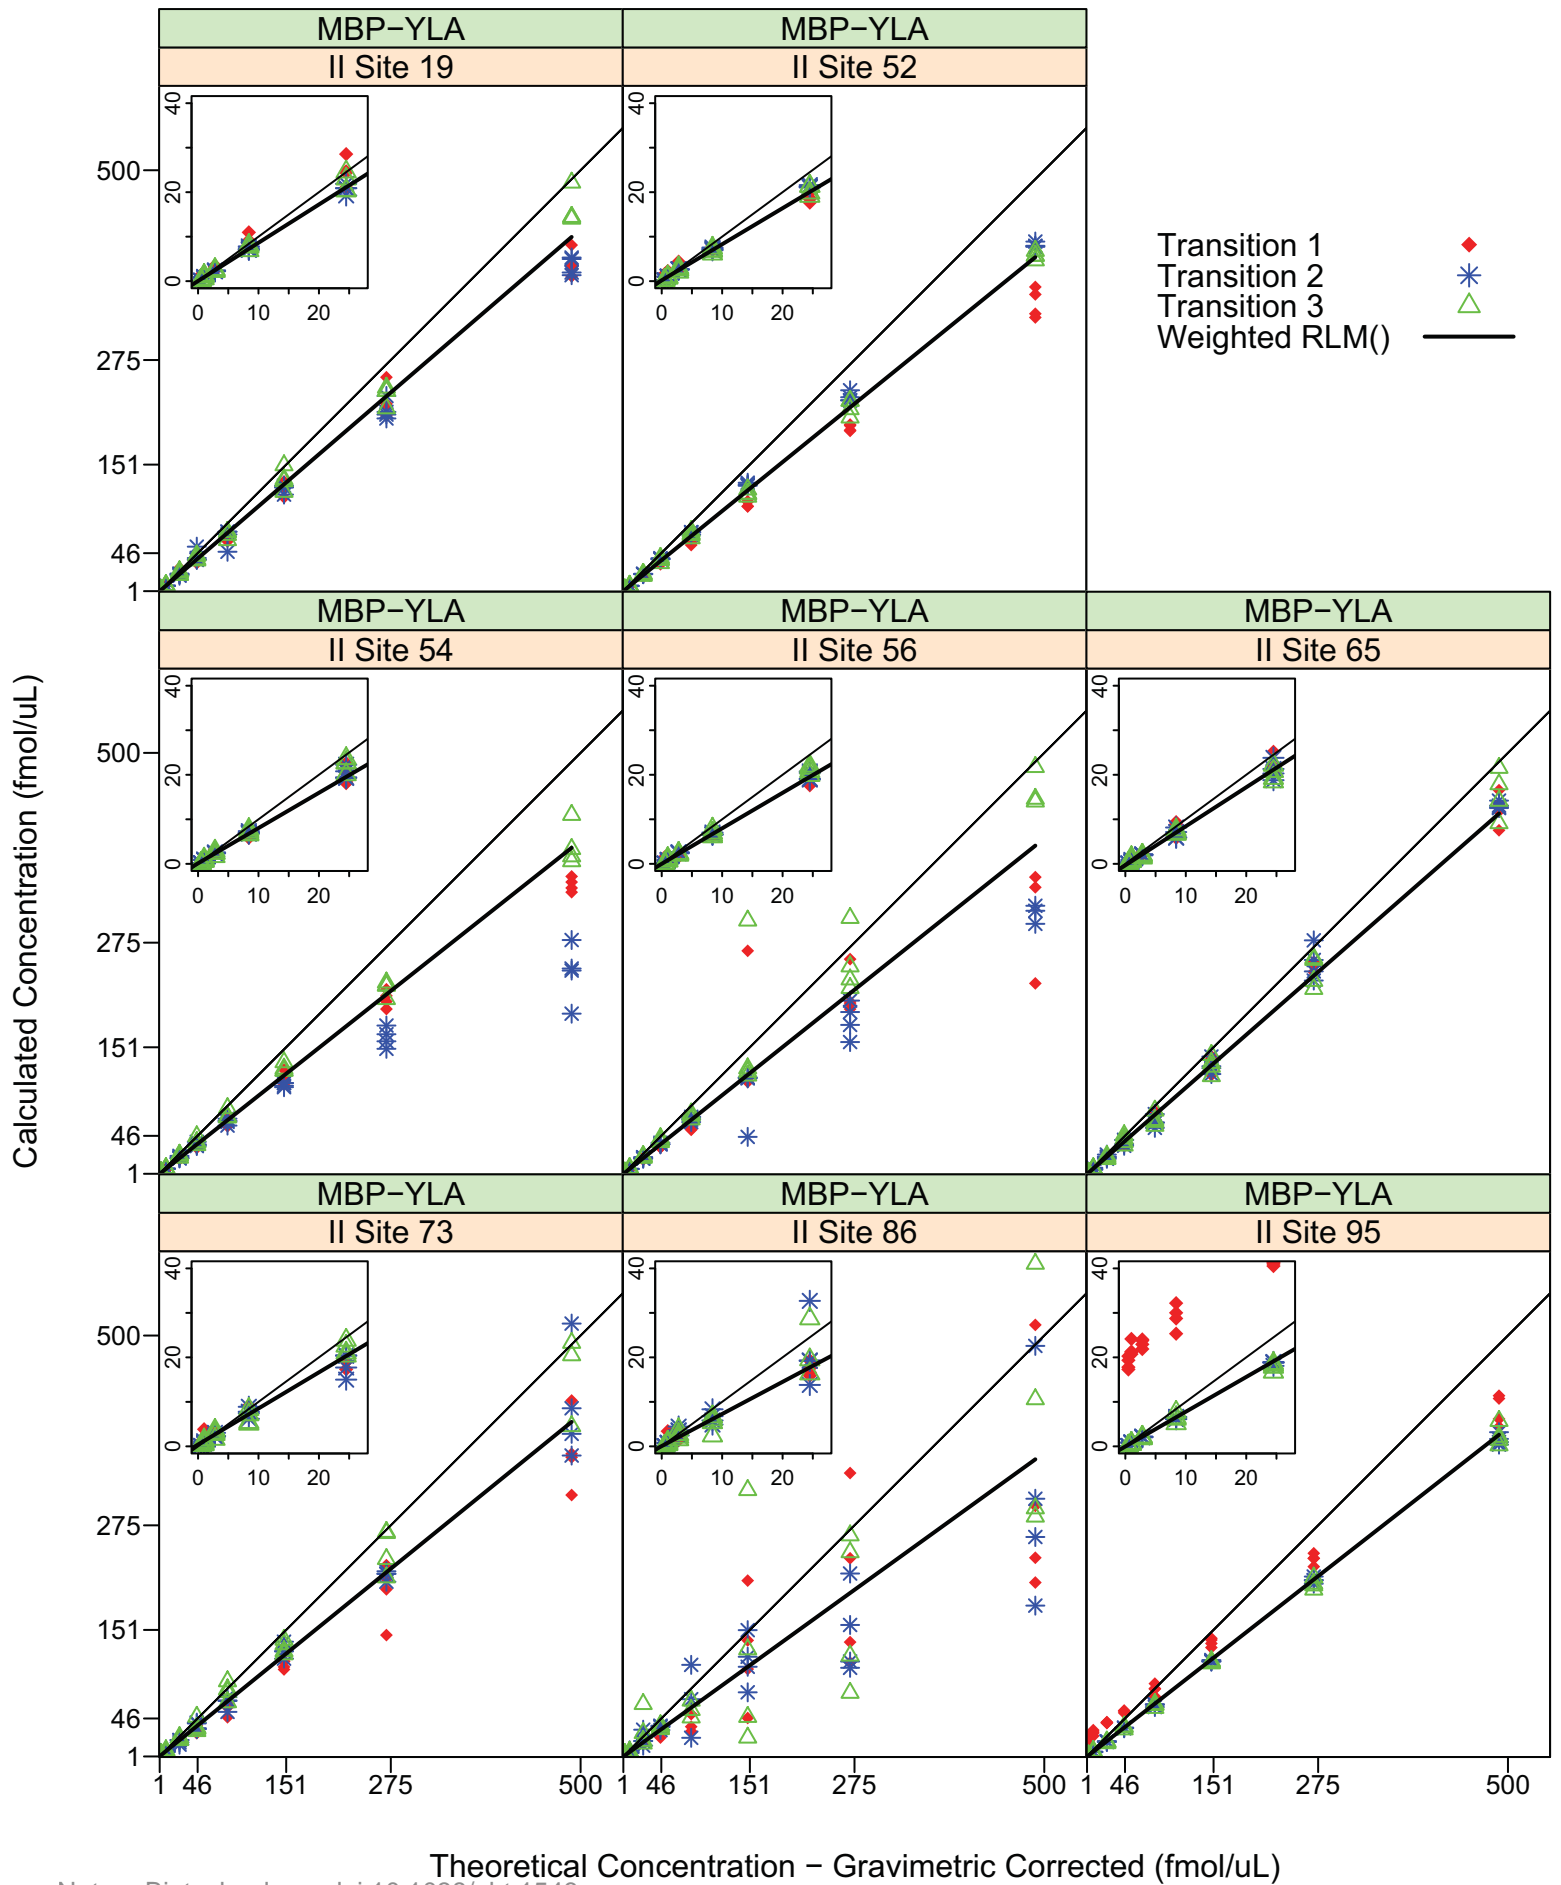

Theoretical Concentration - Gravimetric Corrected (fmol/uL)

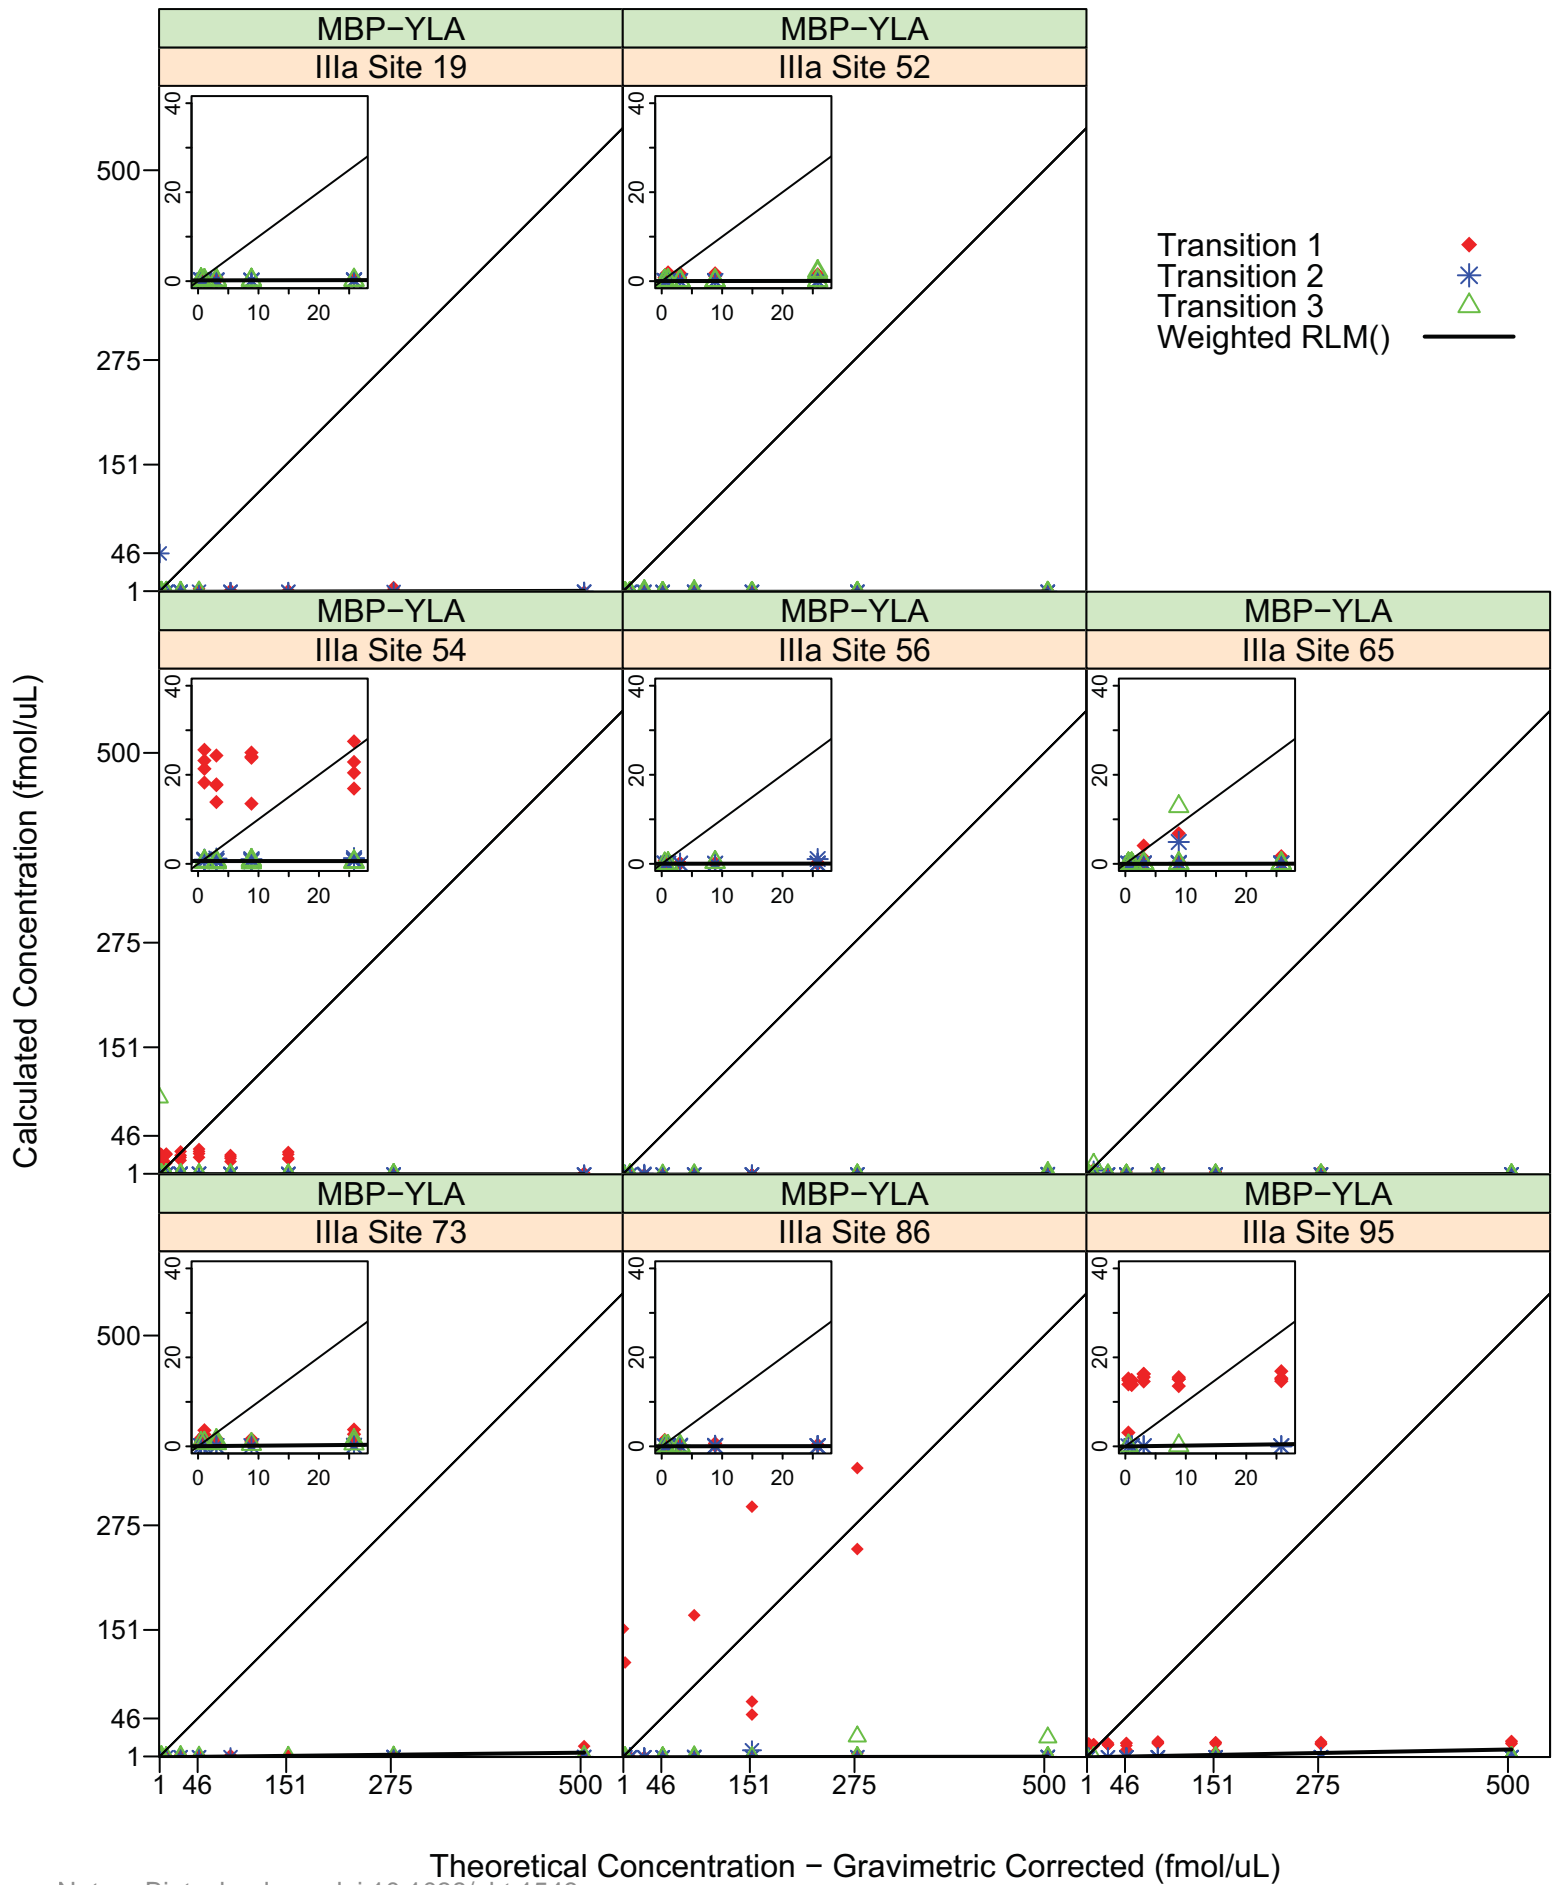

Theoretical Concentration - Gravimetric Corrected (fmol/uL)

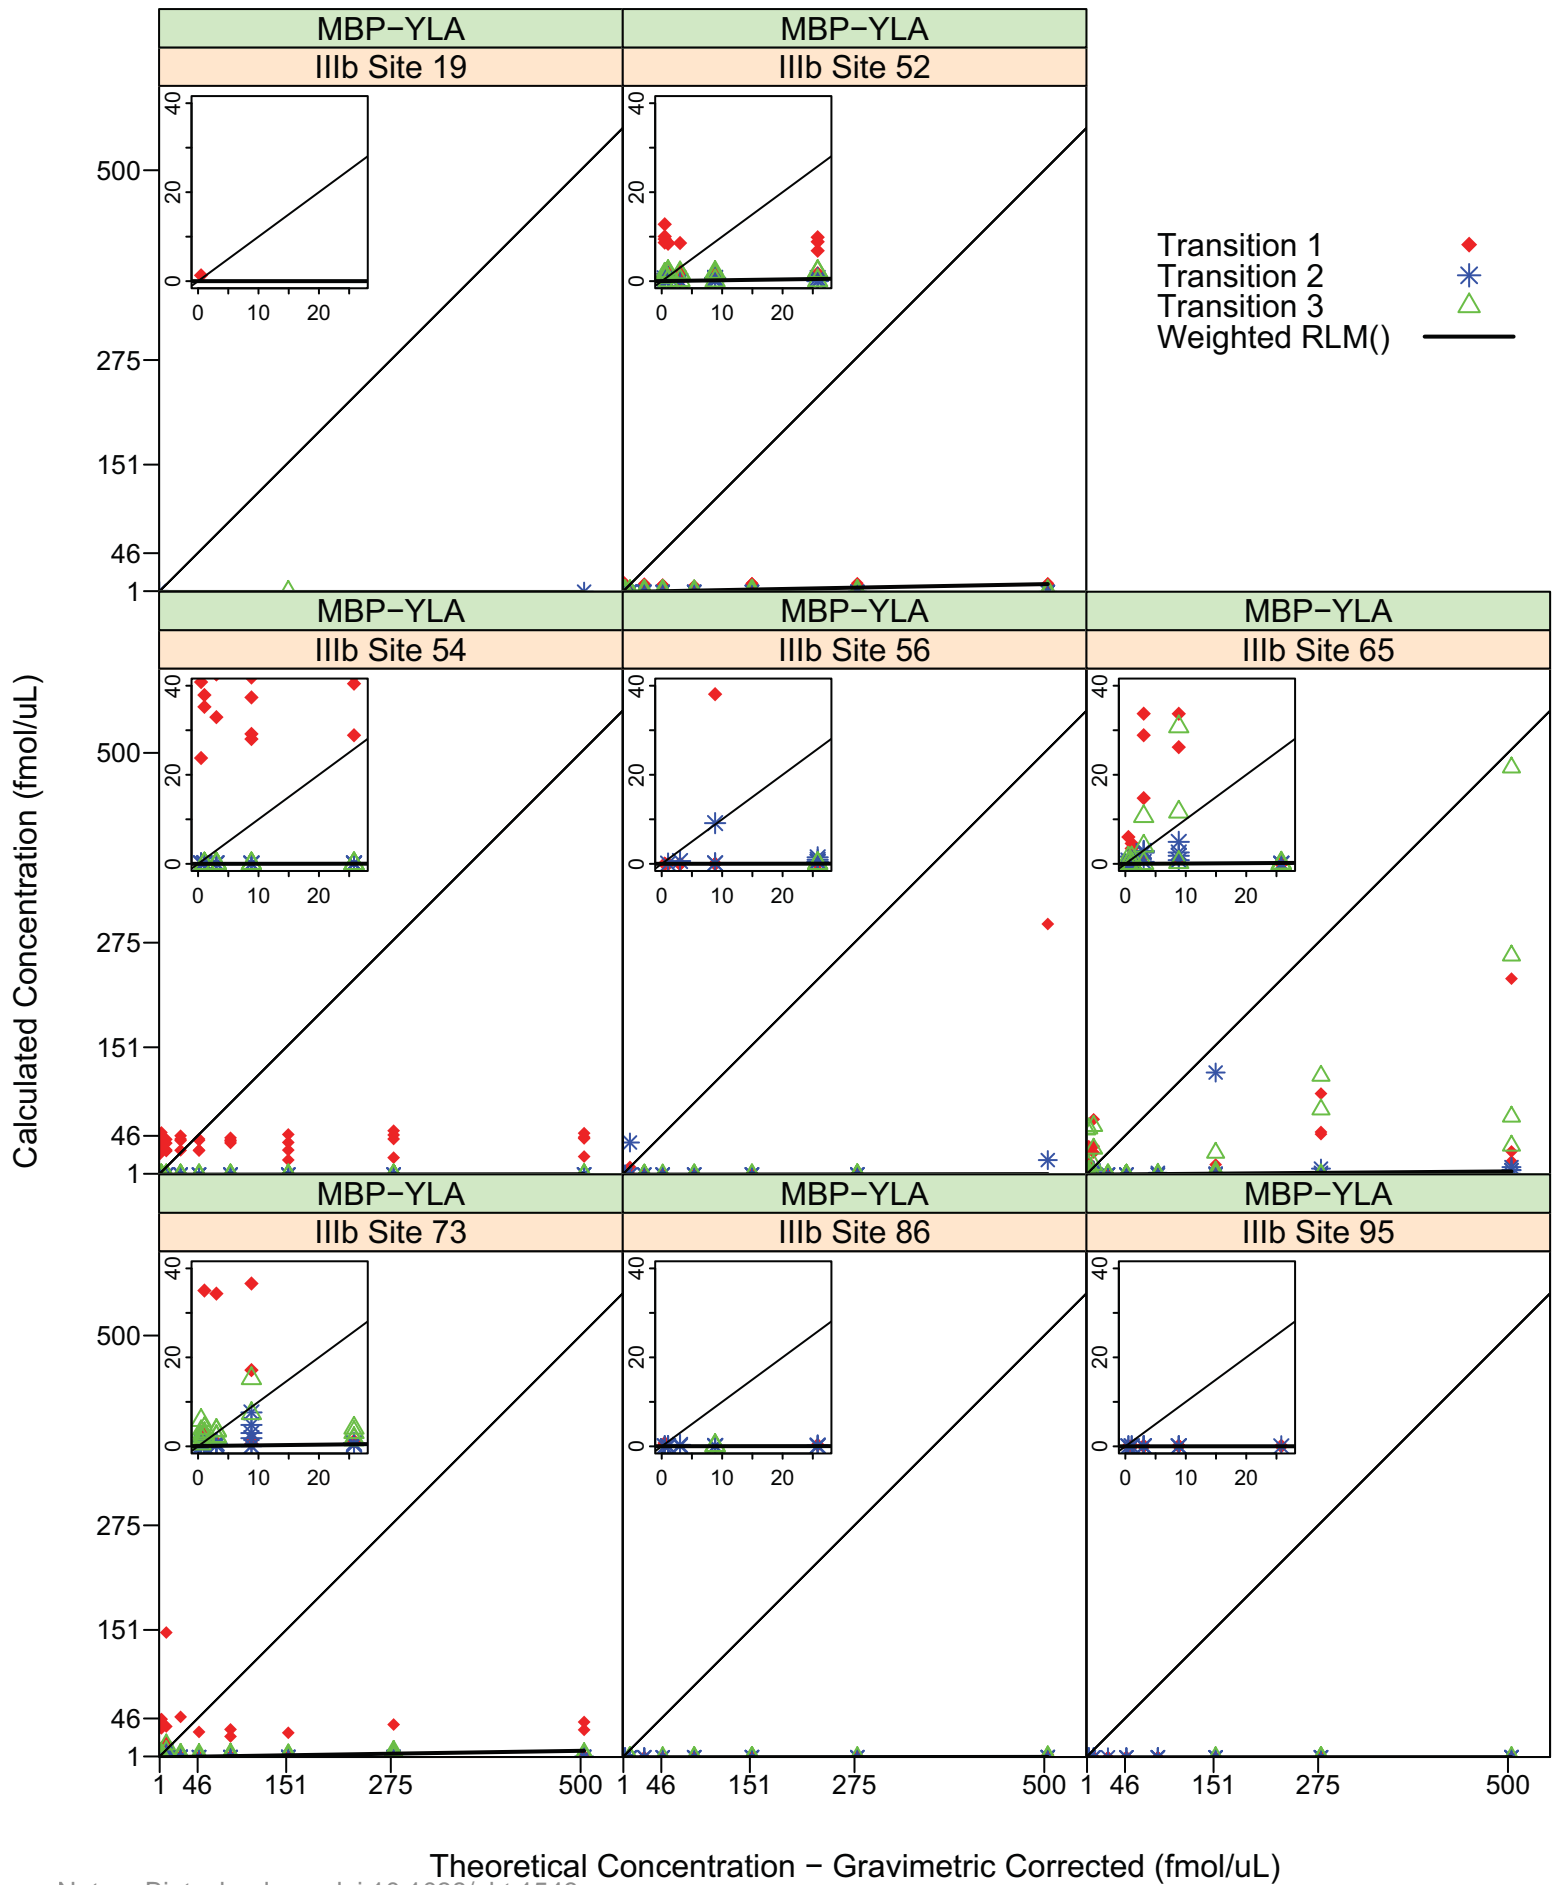

Theoretical Concentration - Gravimetric Corrected (fmol/uL)

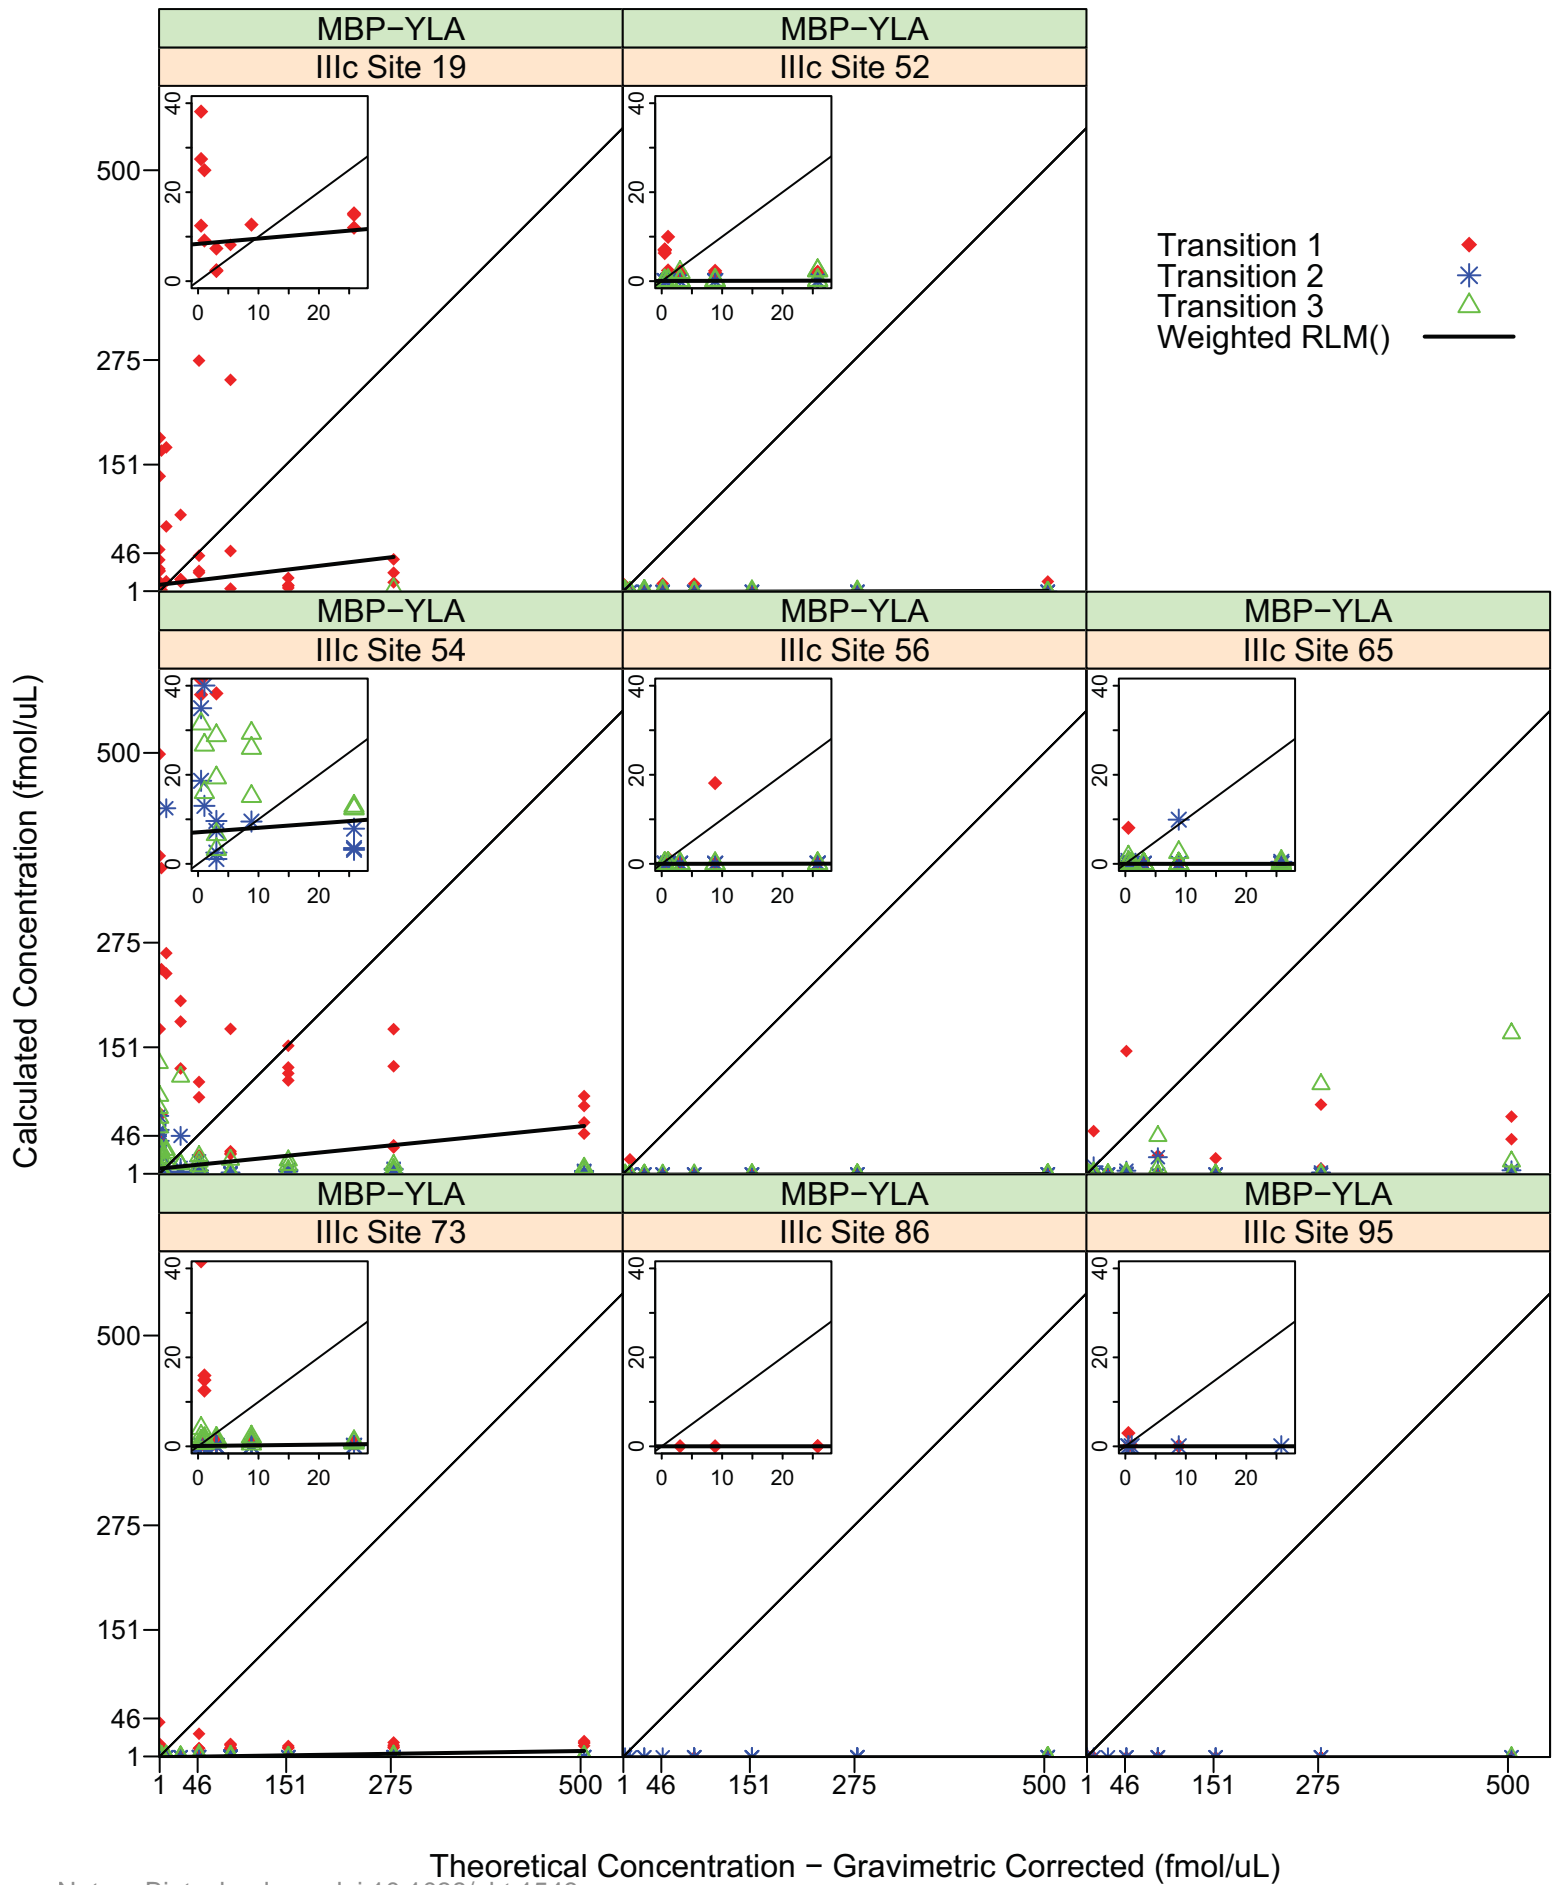

Theoretical Concentration - Gravimetric Corrected (fmol/uL)

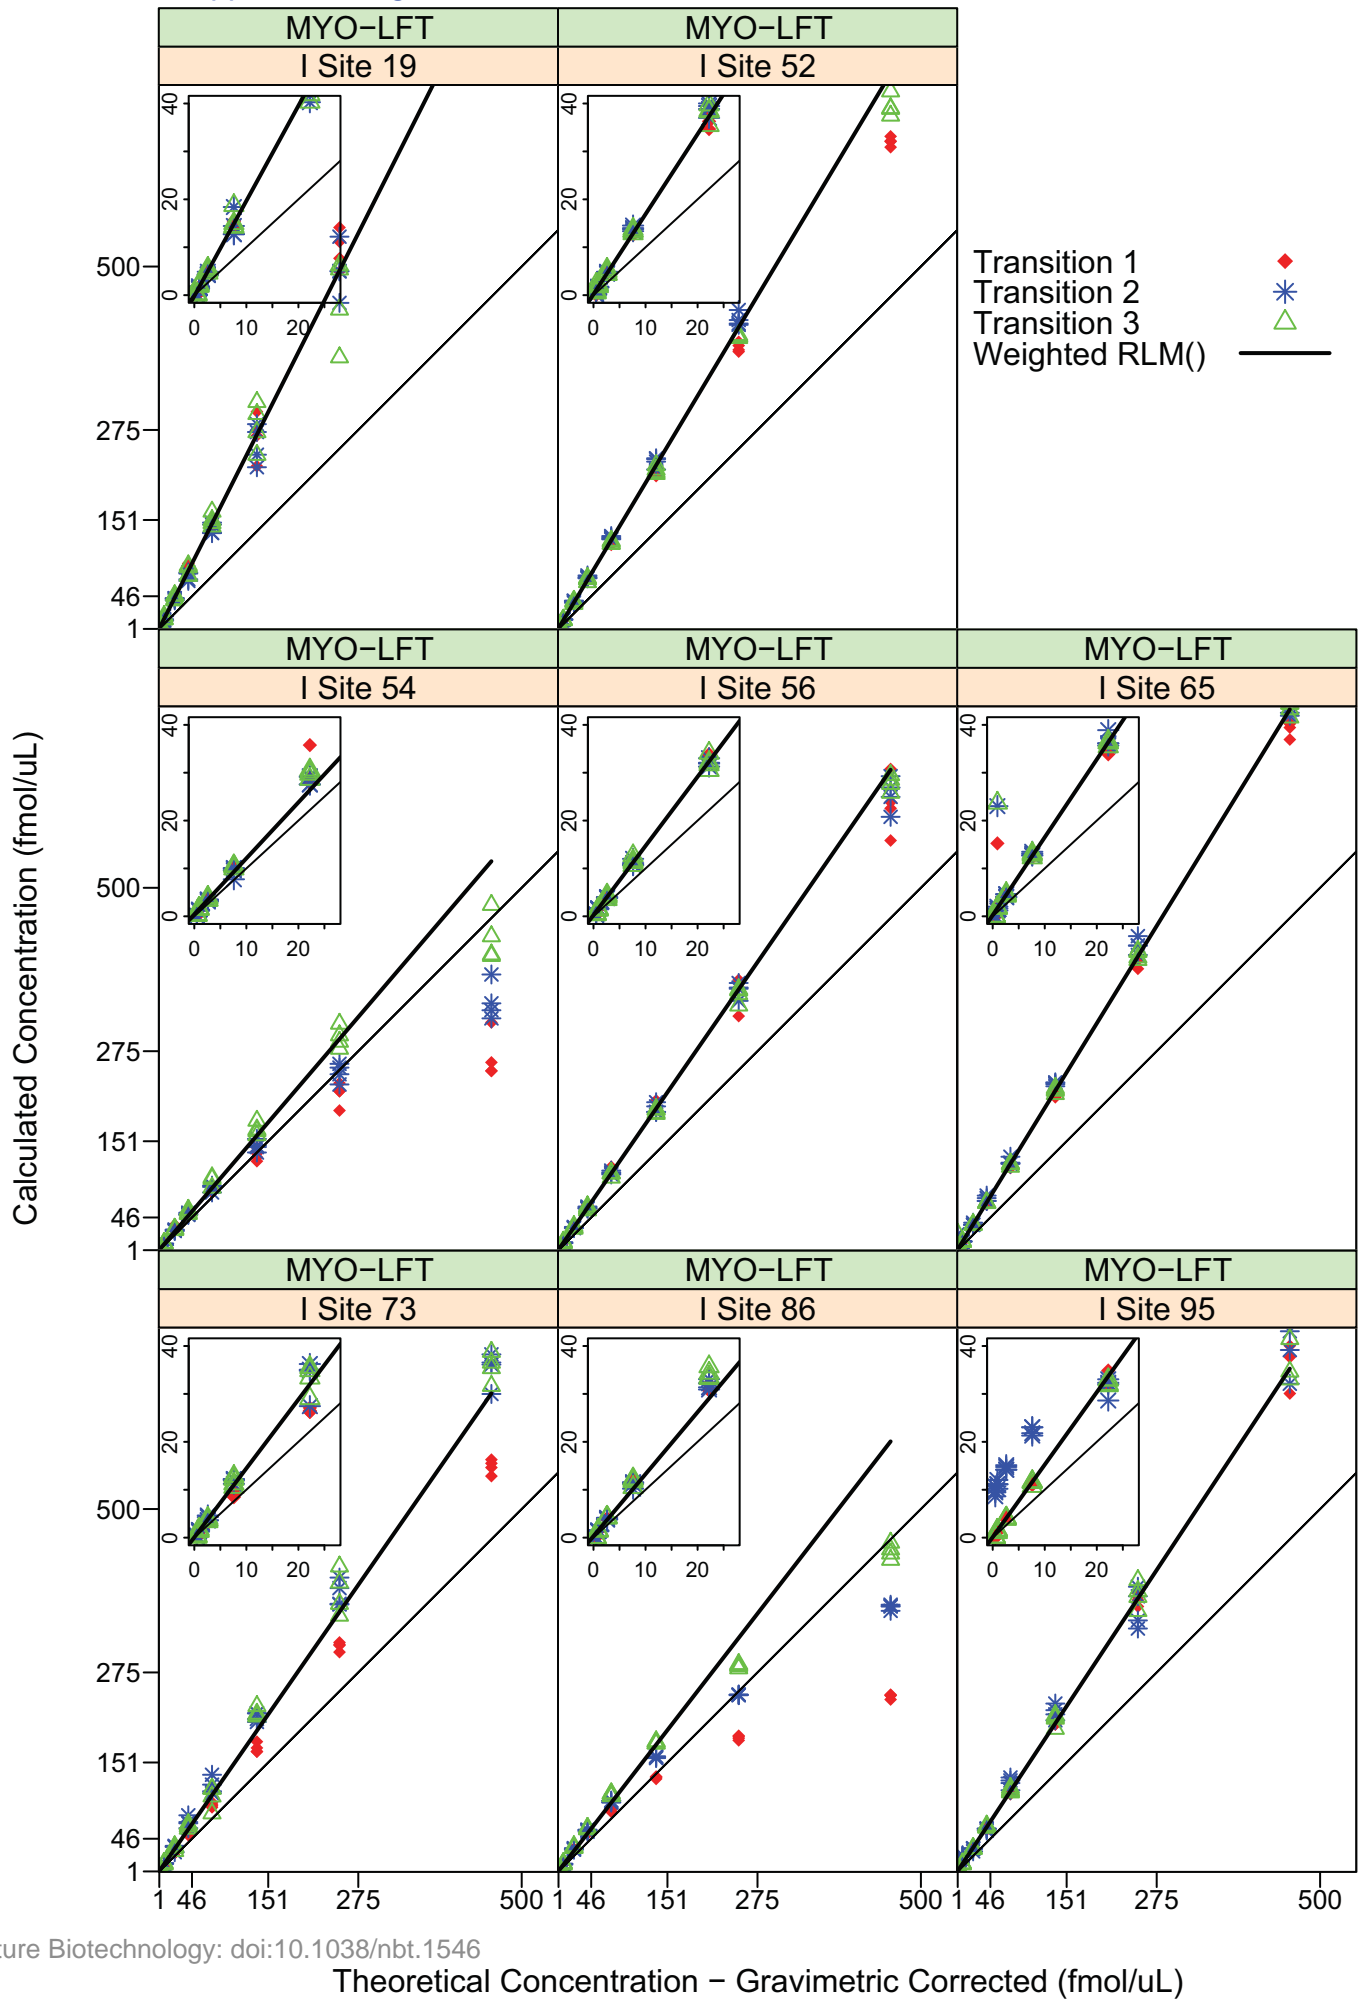

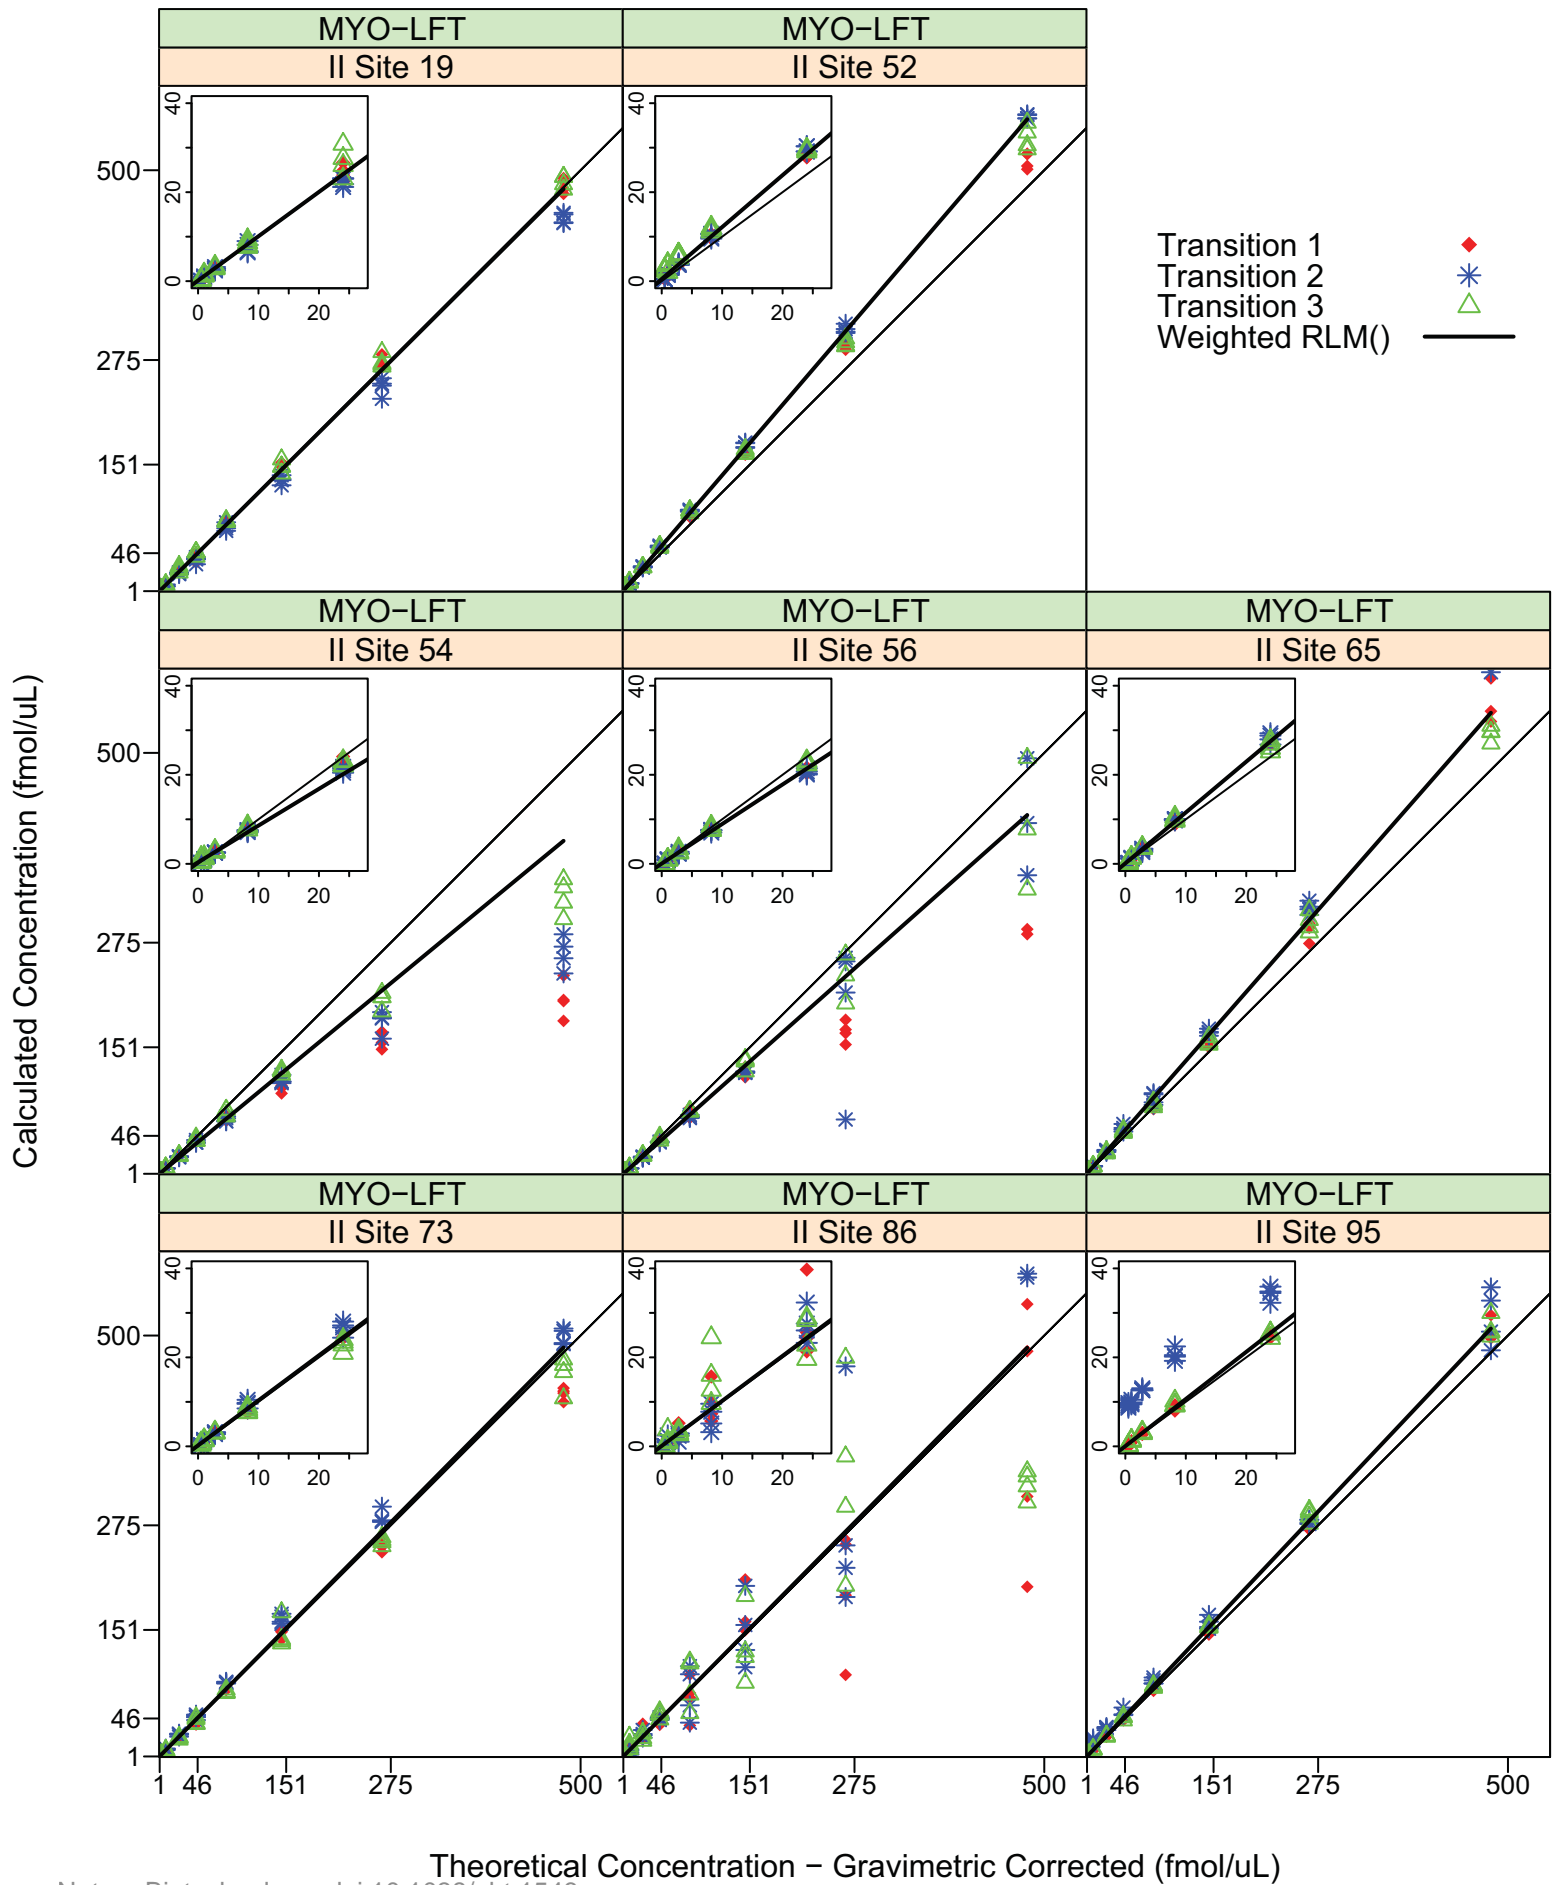

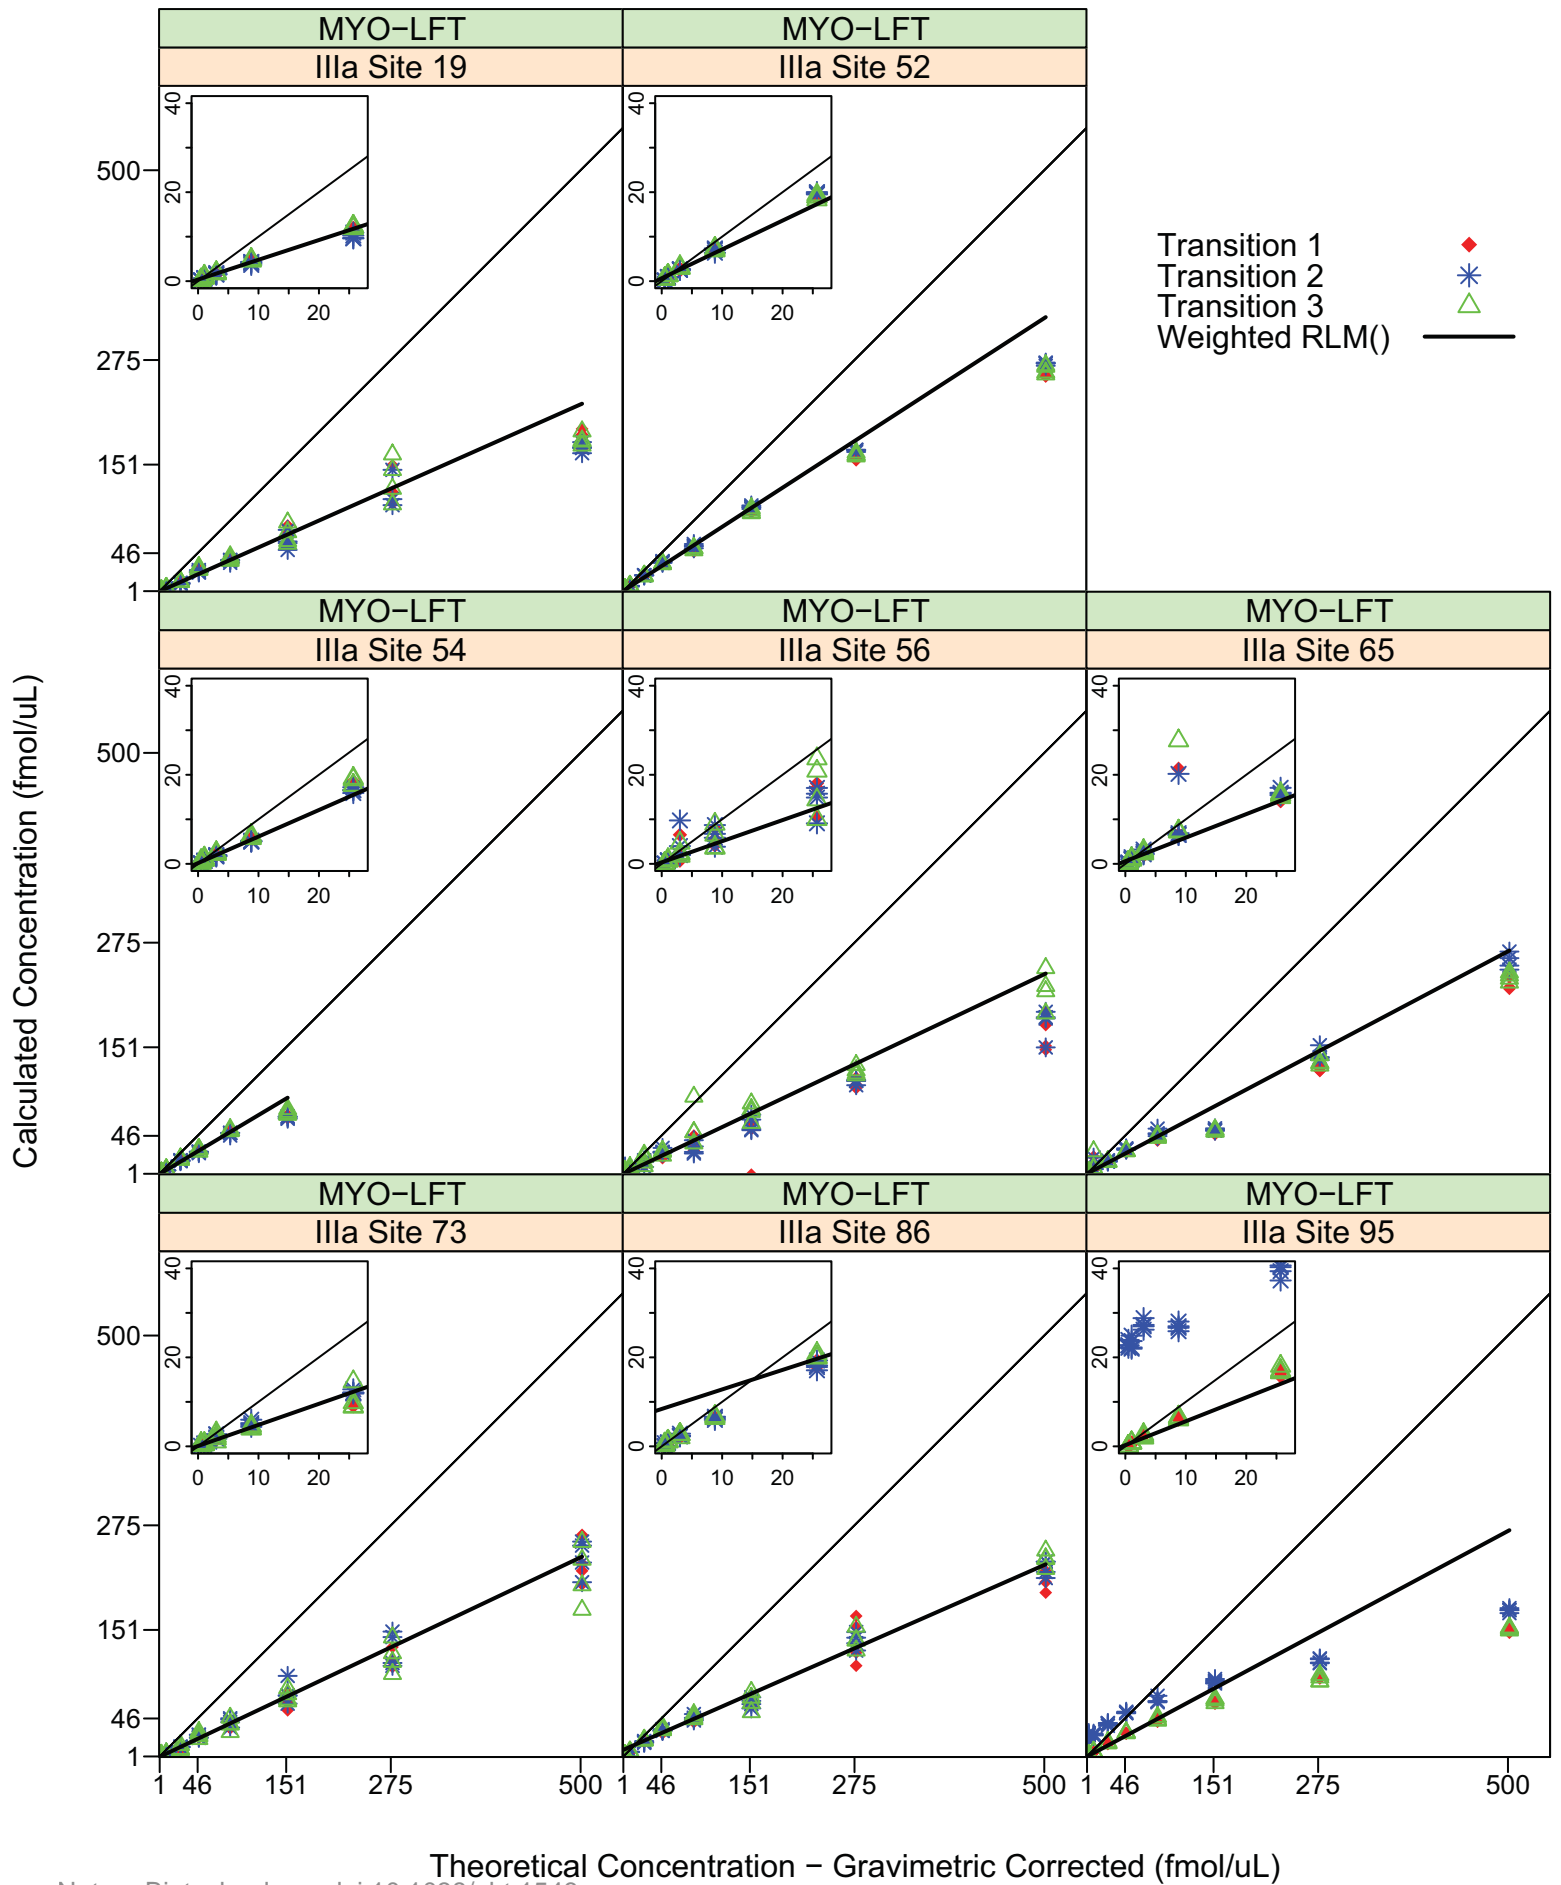

Theoretical Concentration - Gravimetric Corrected (fmol/uL)

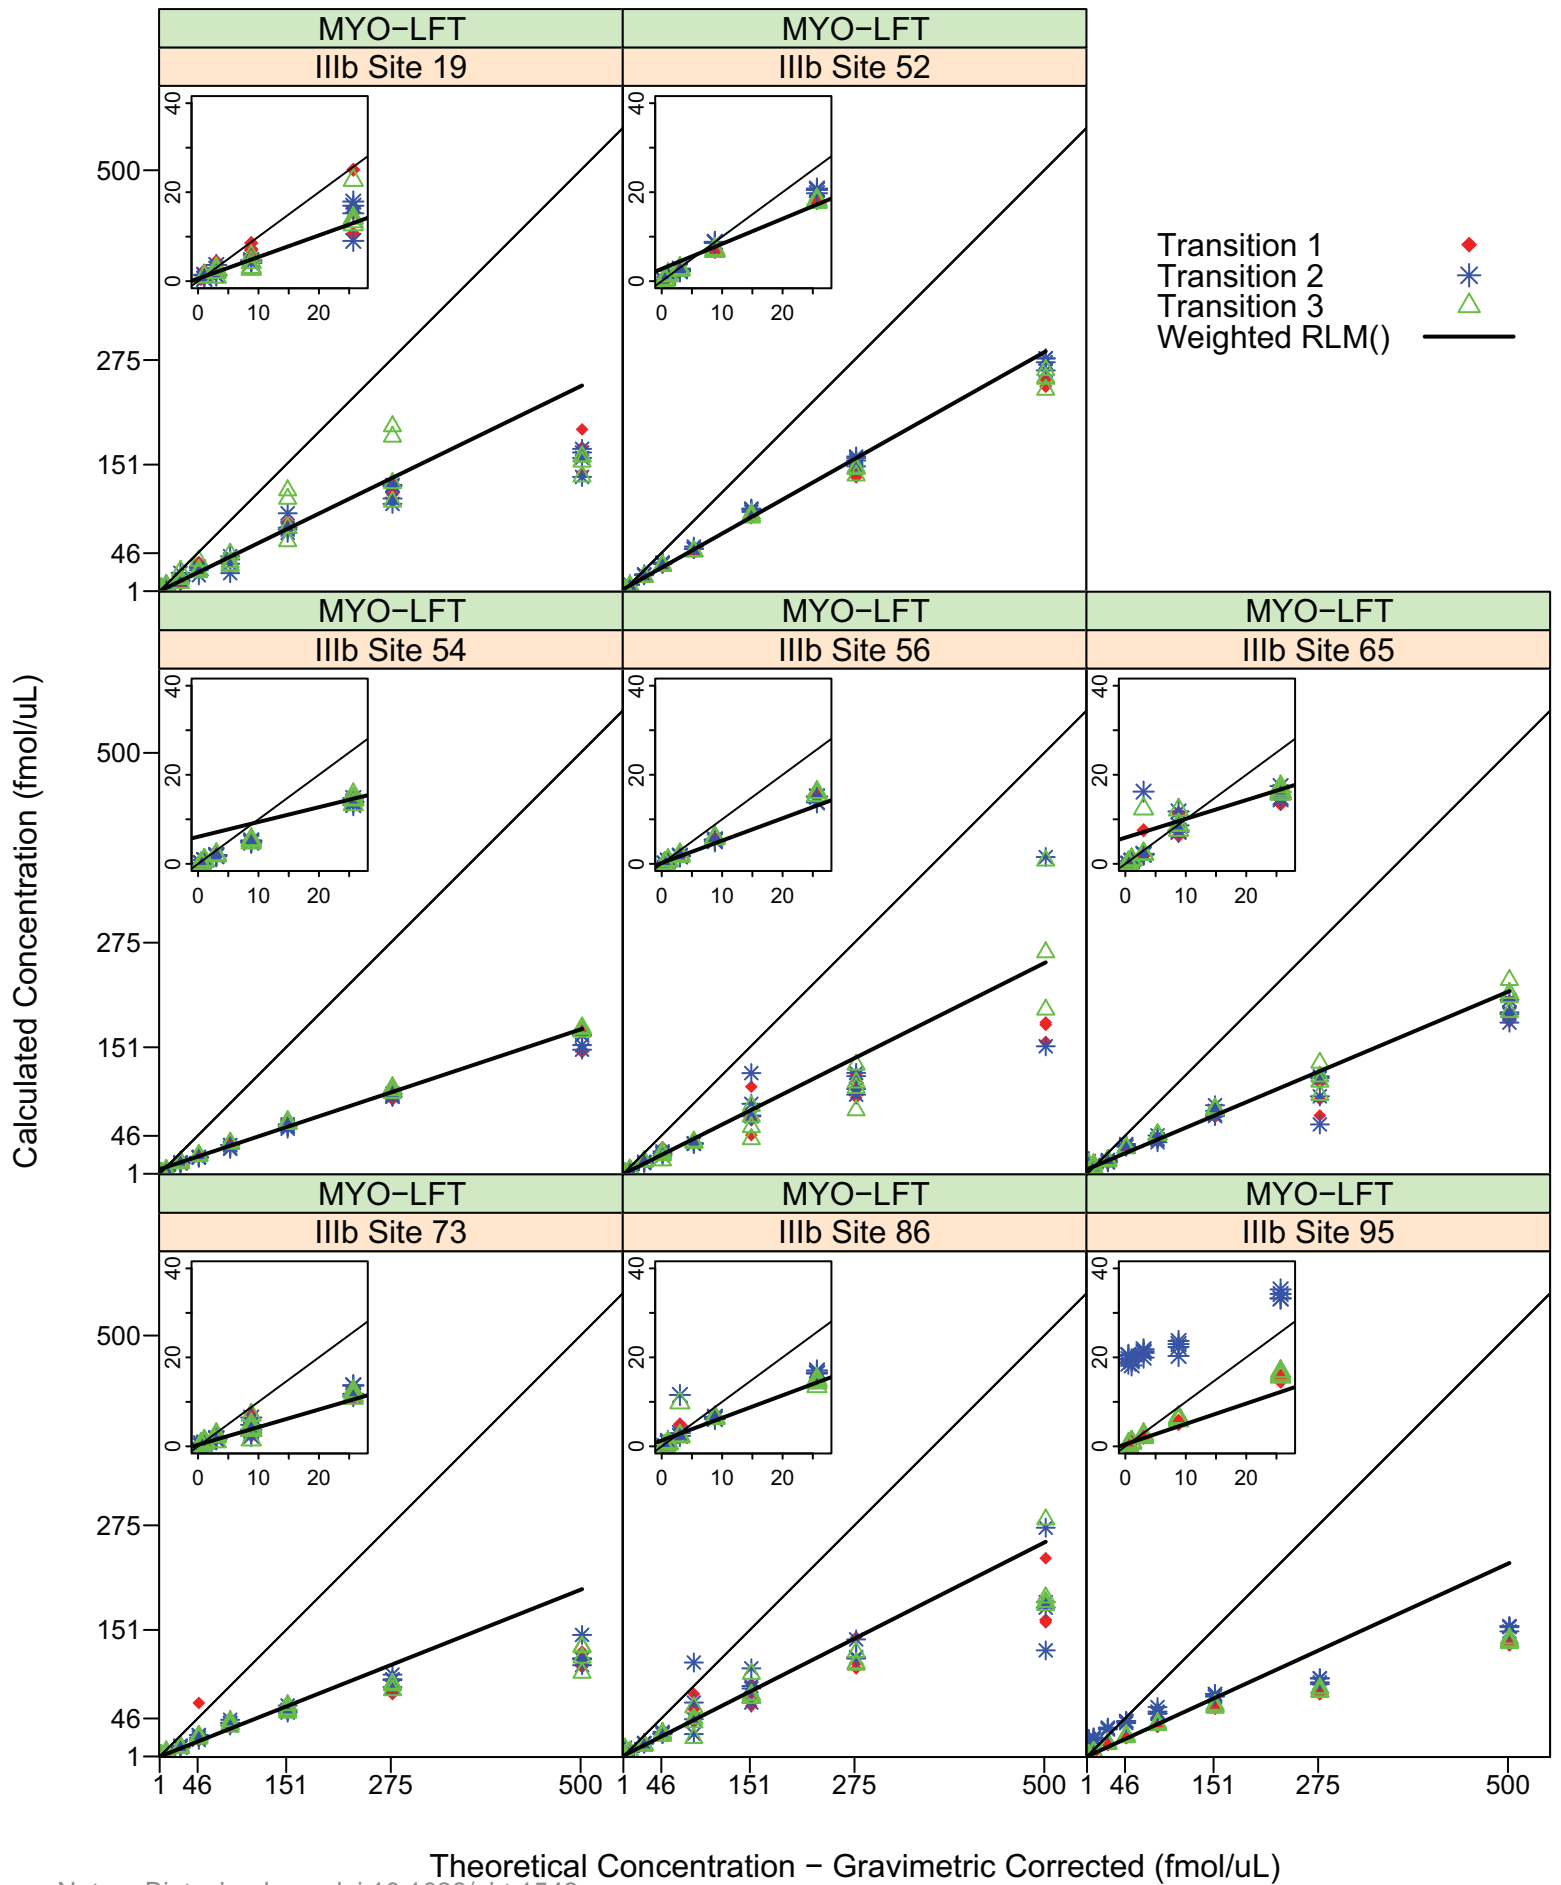

Theoretical Concentration - Gravimetric Corrected (fmol/uL)



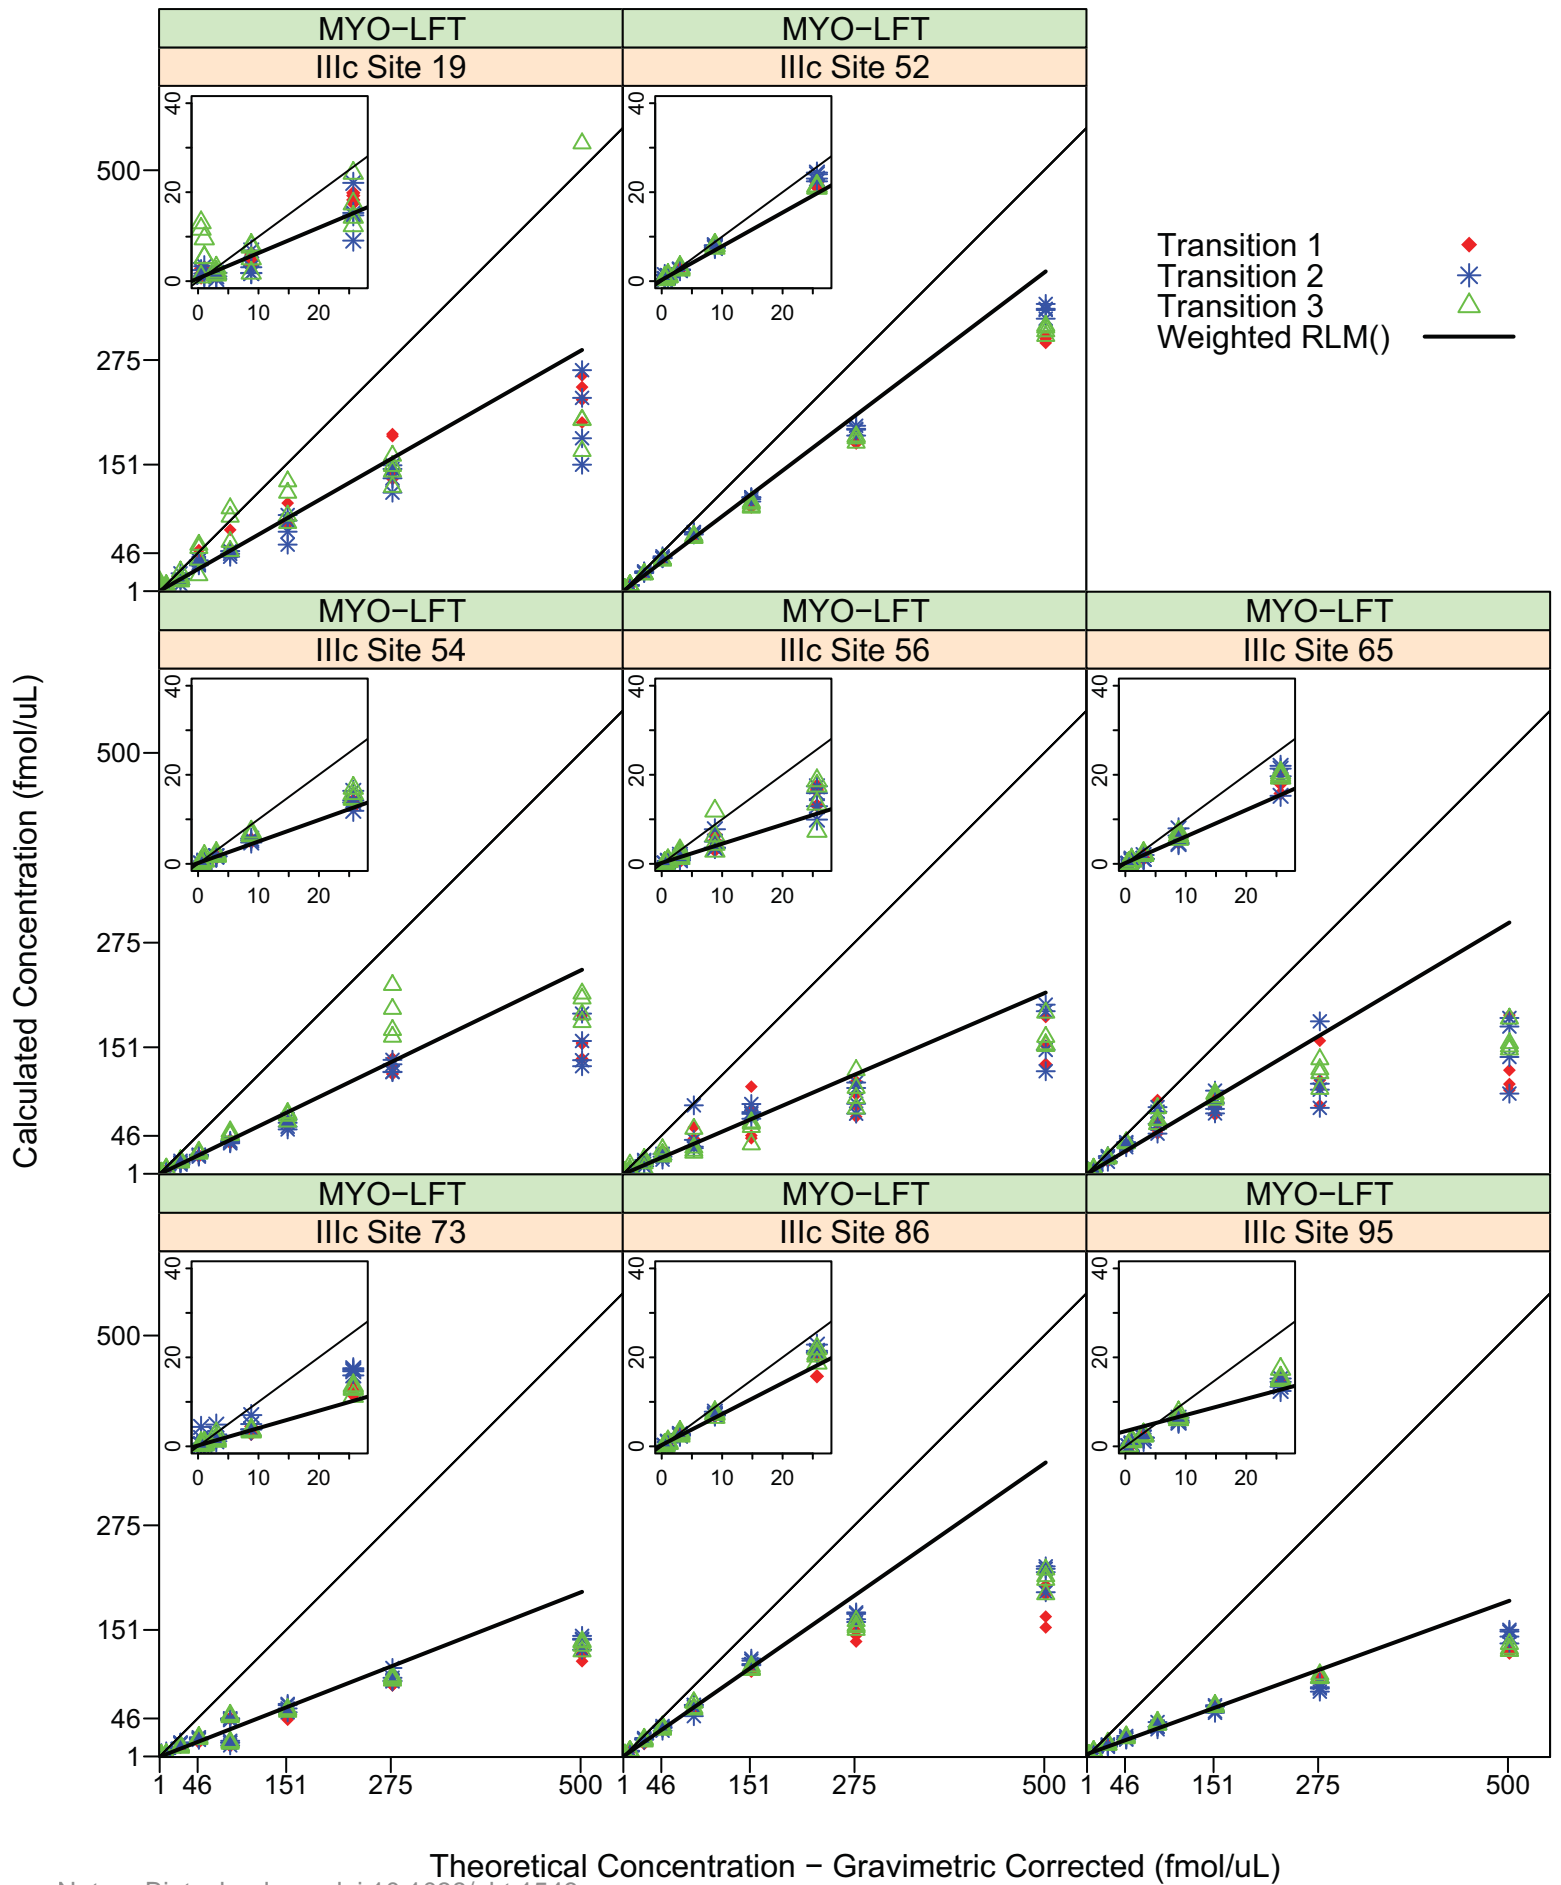

Theoretical Concentration - Gravimetric Corrected (fmol/uL)

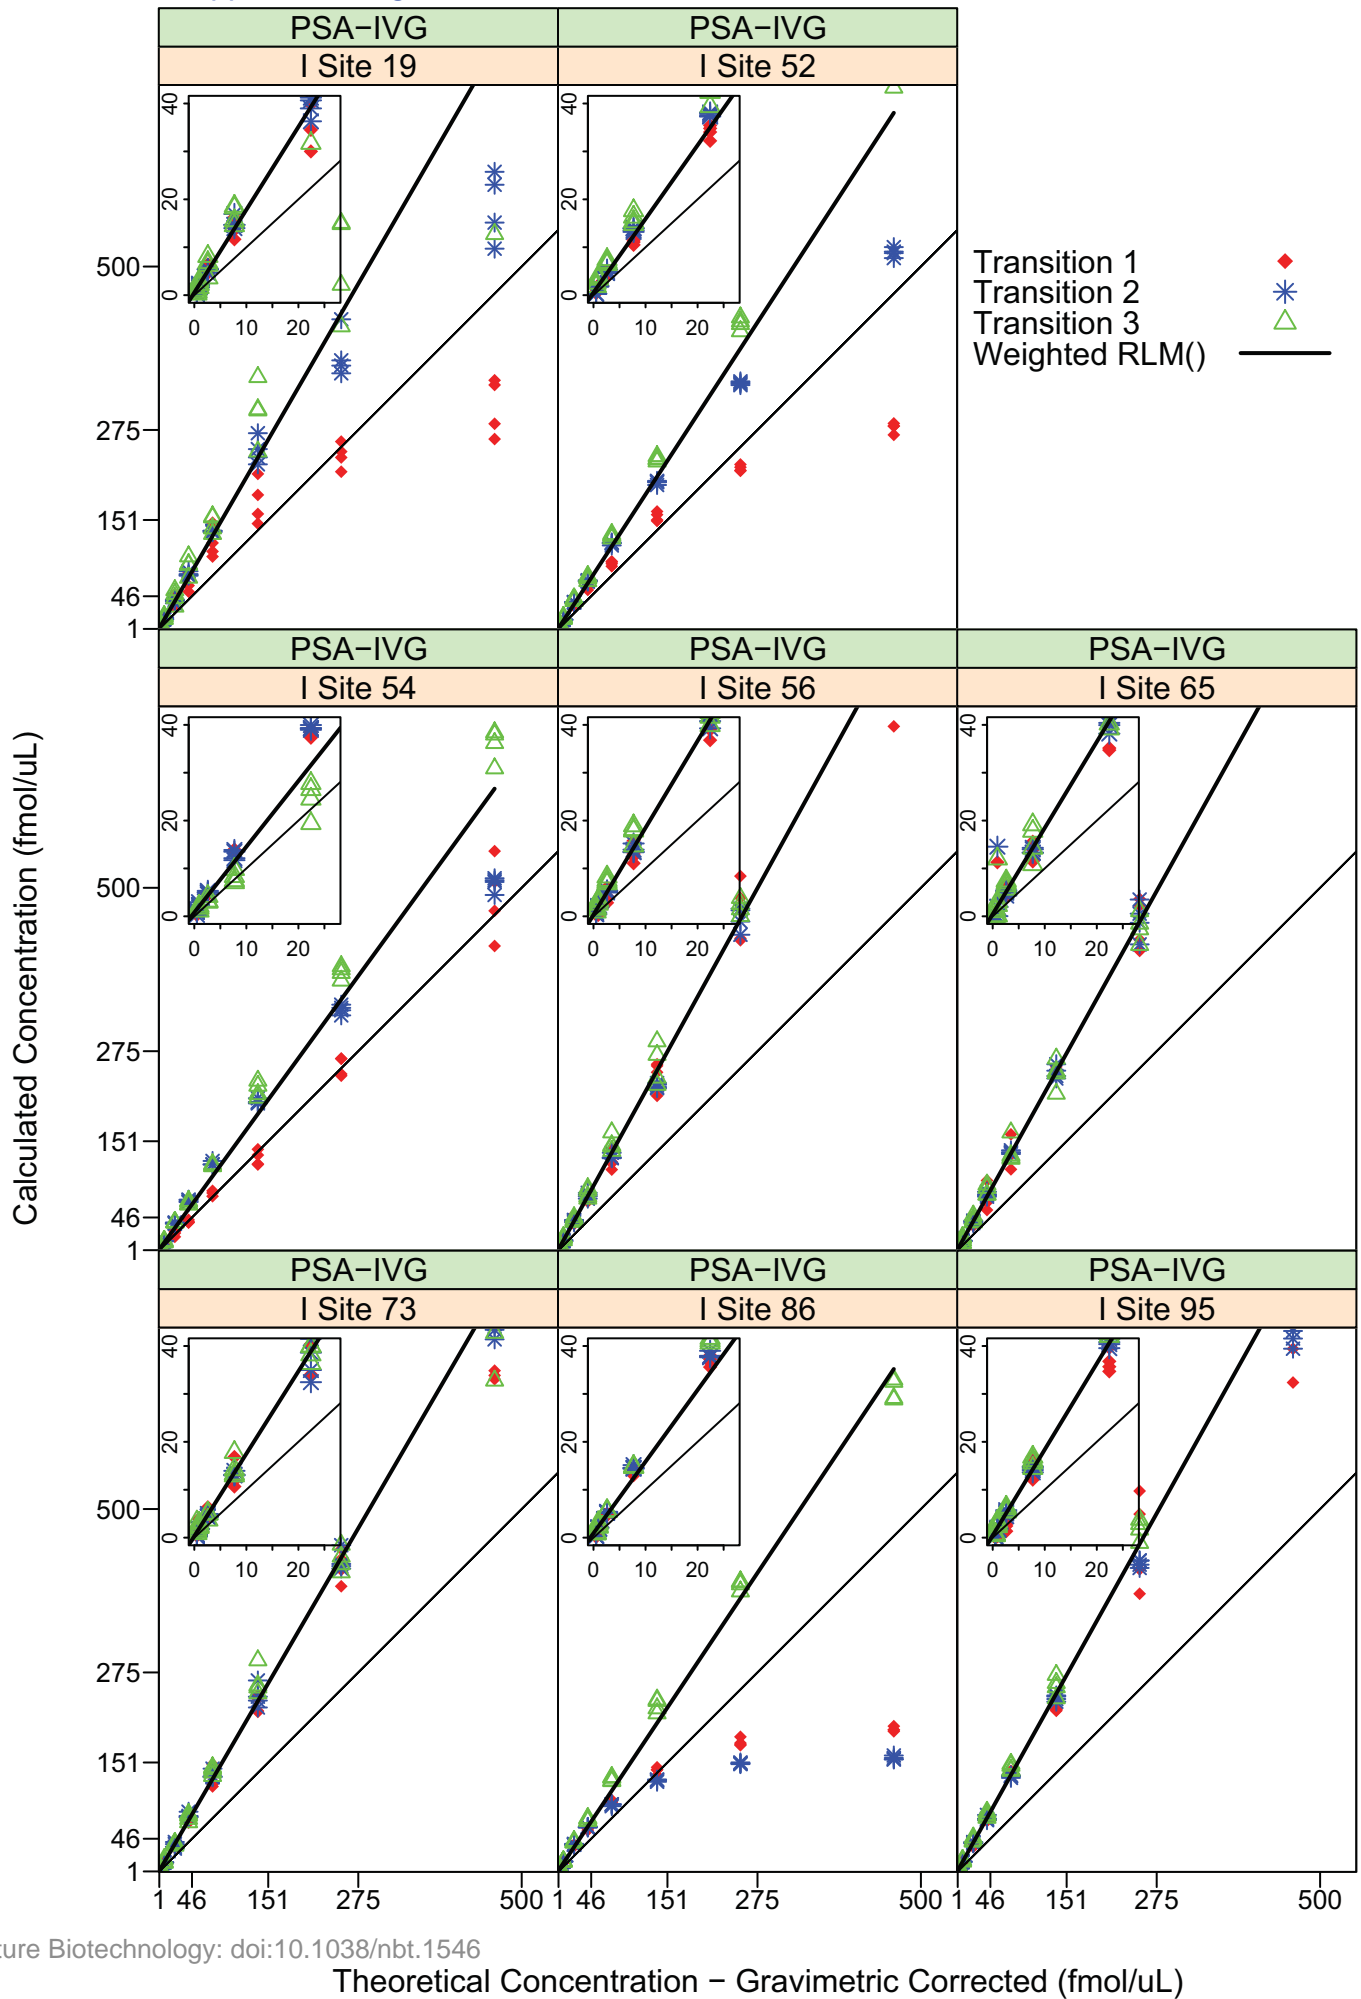

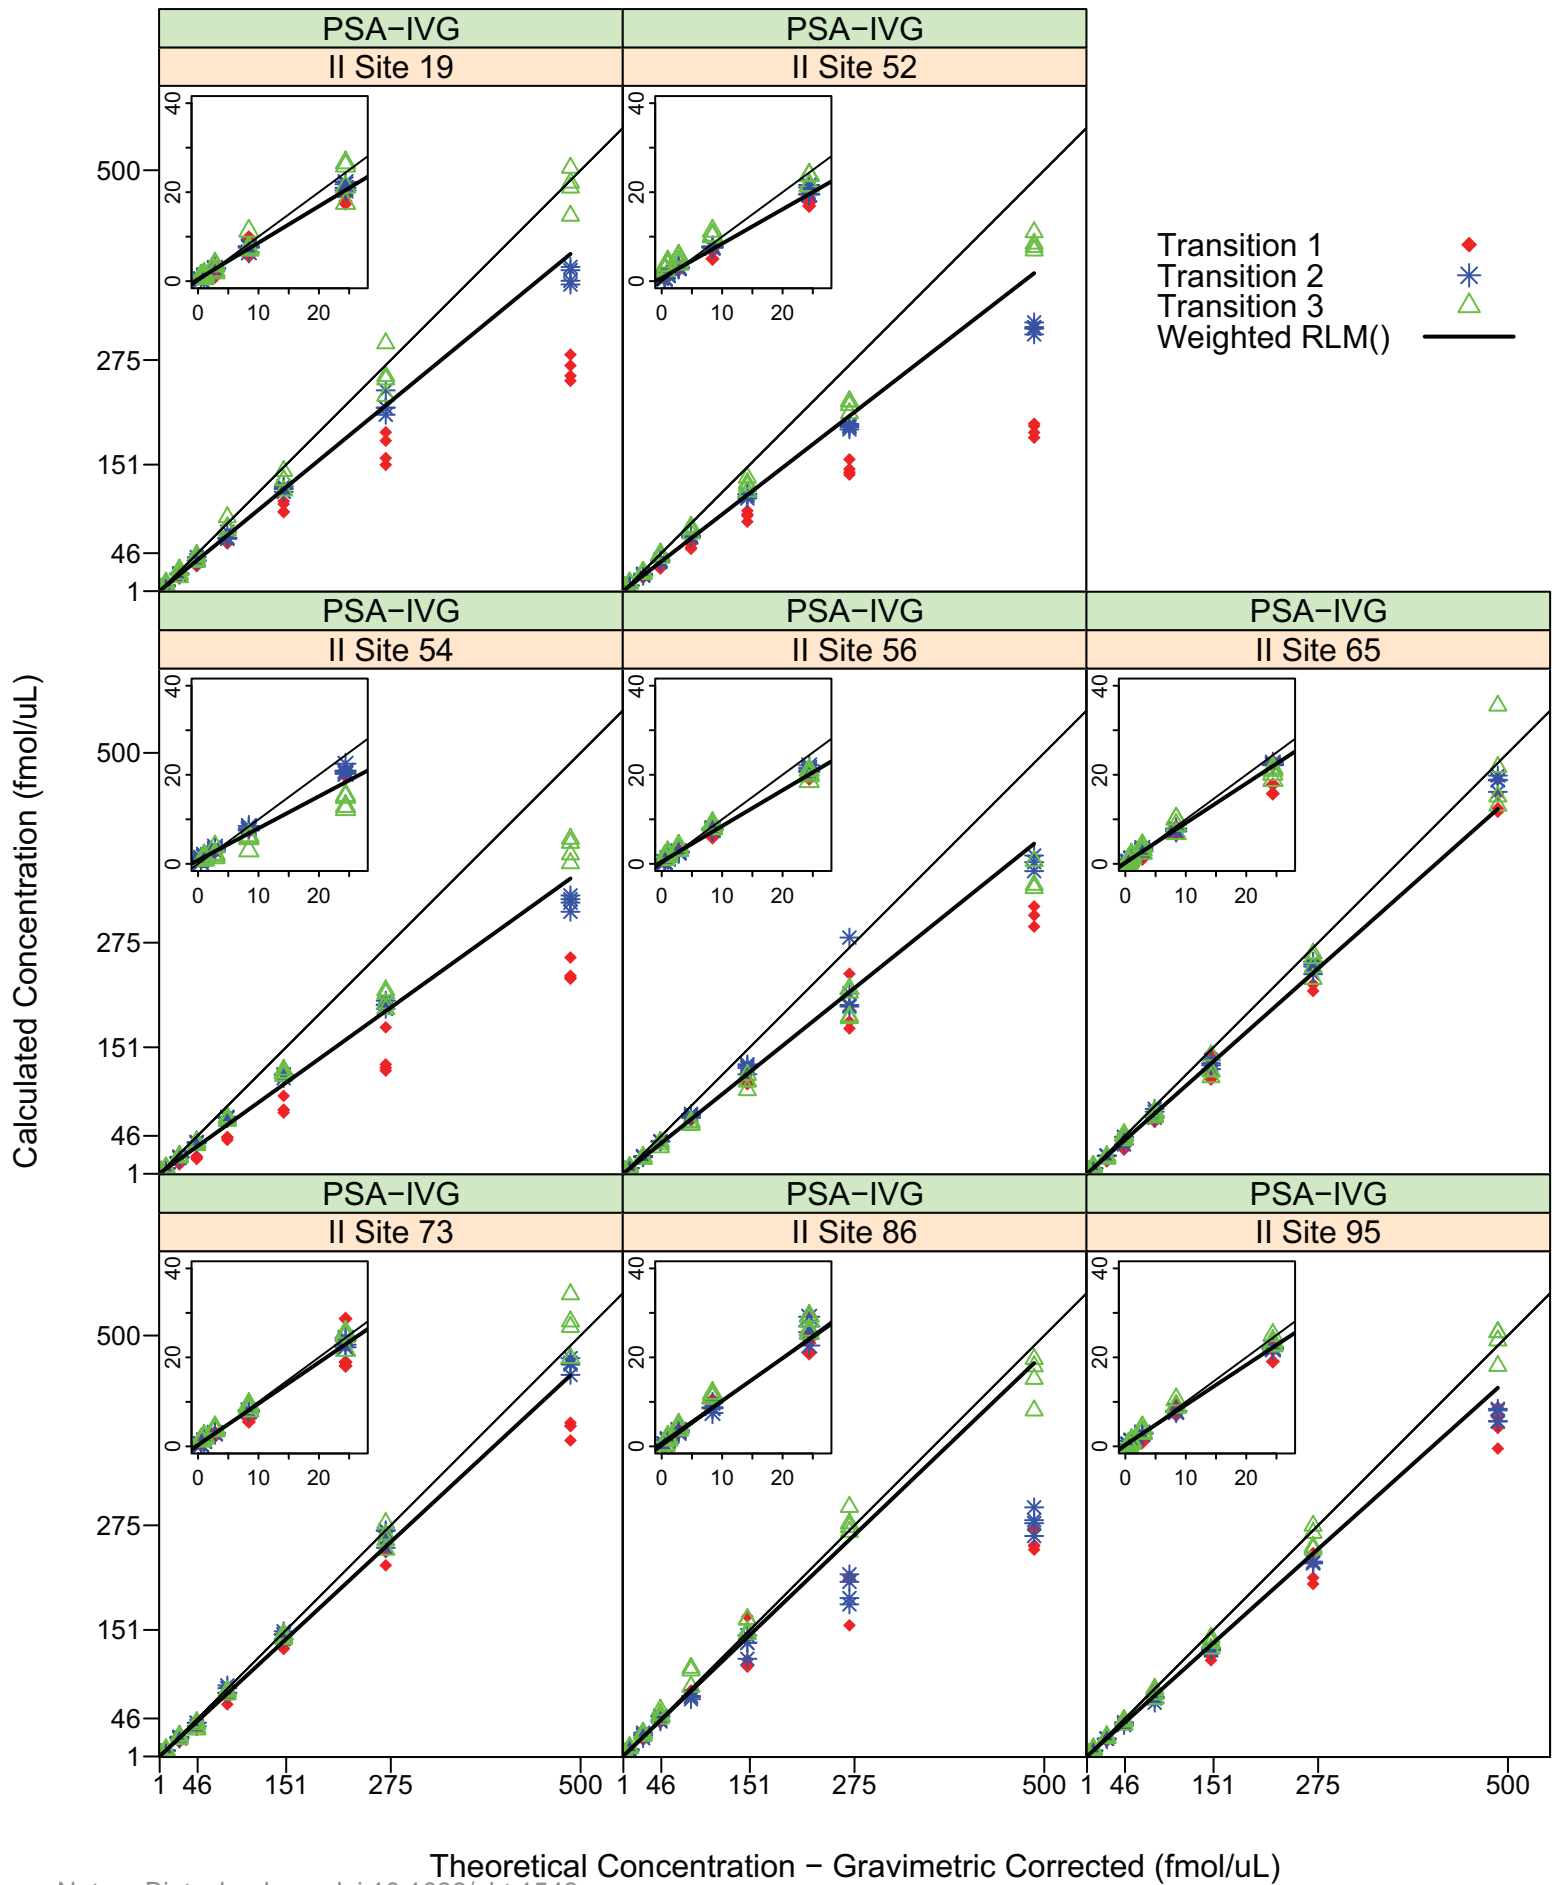

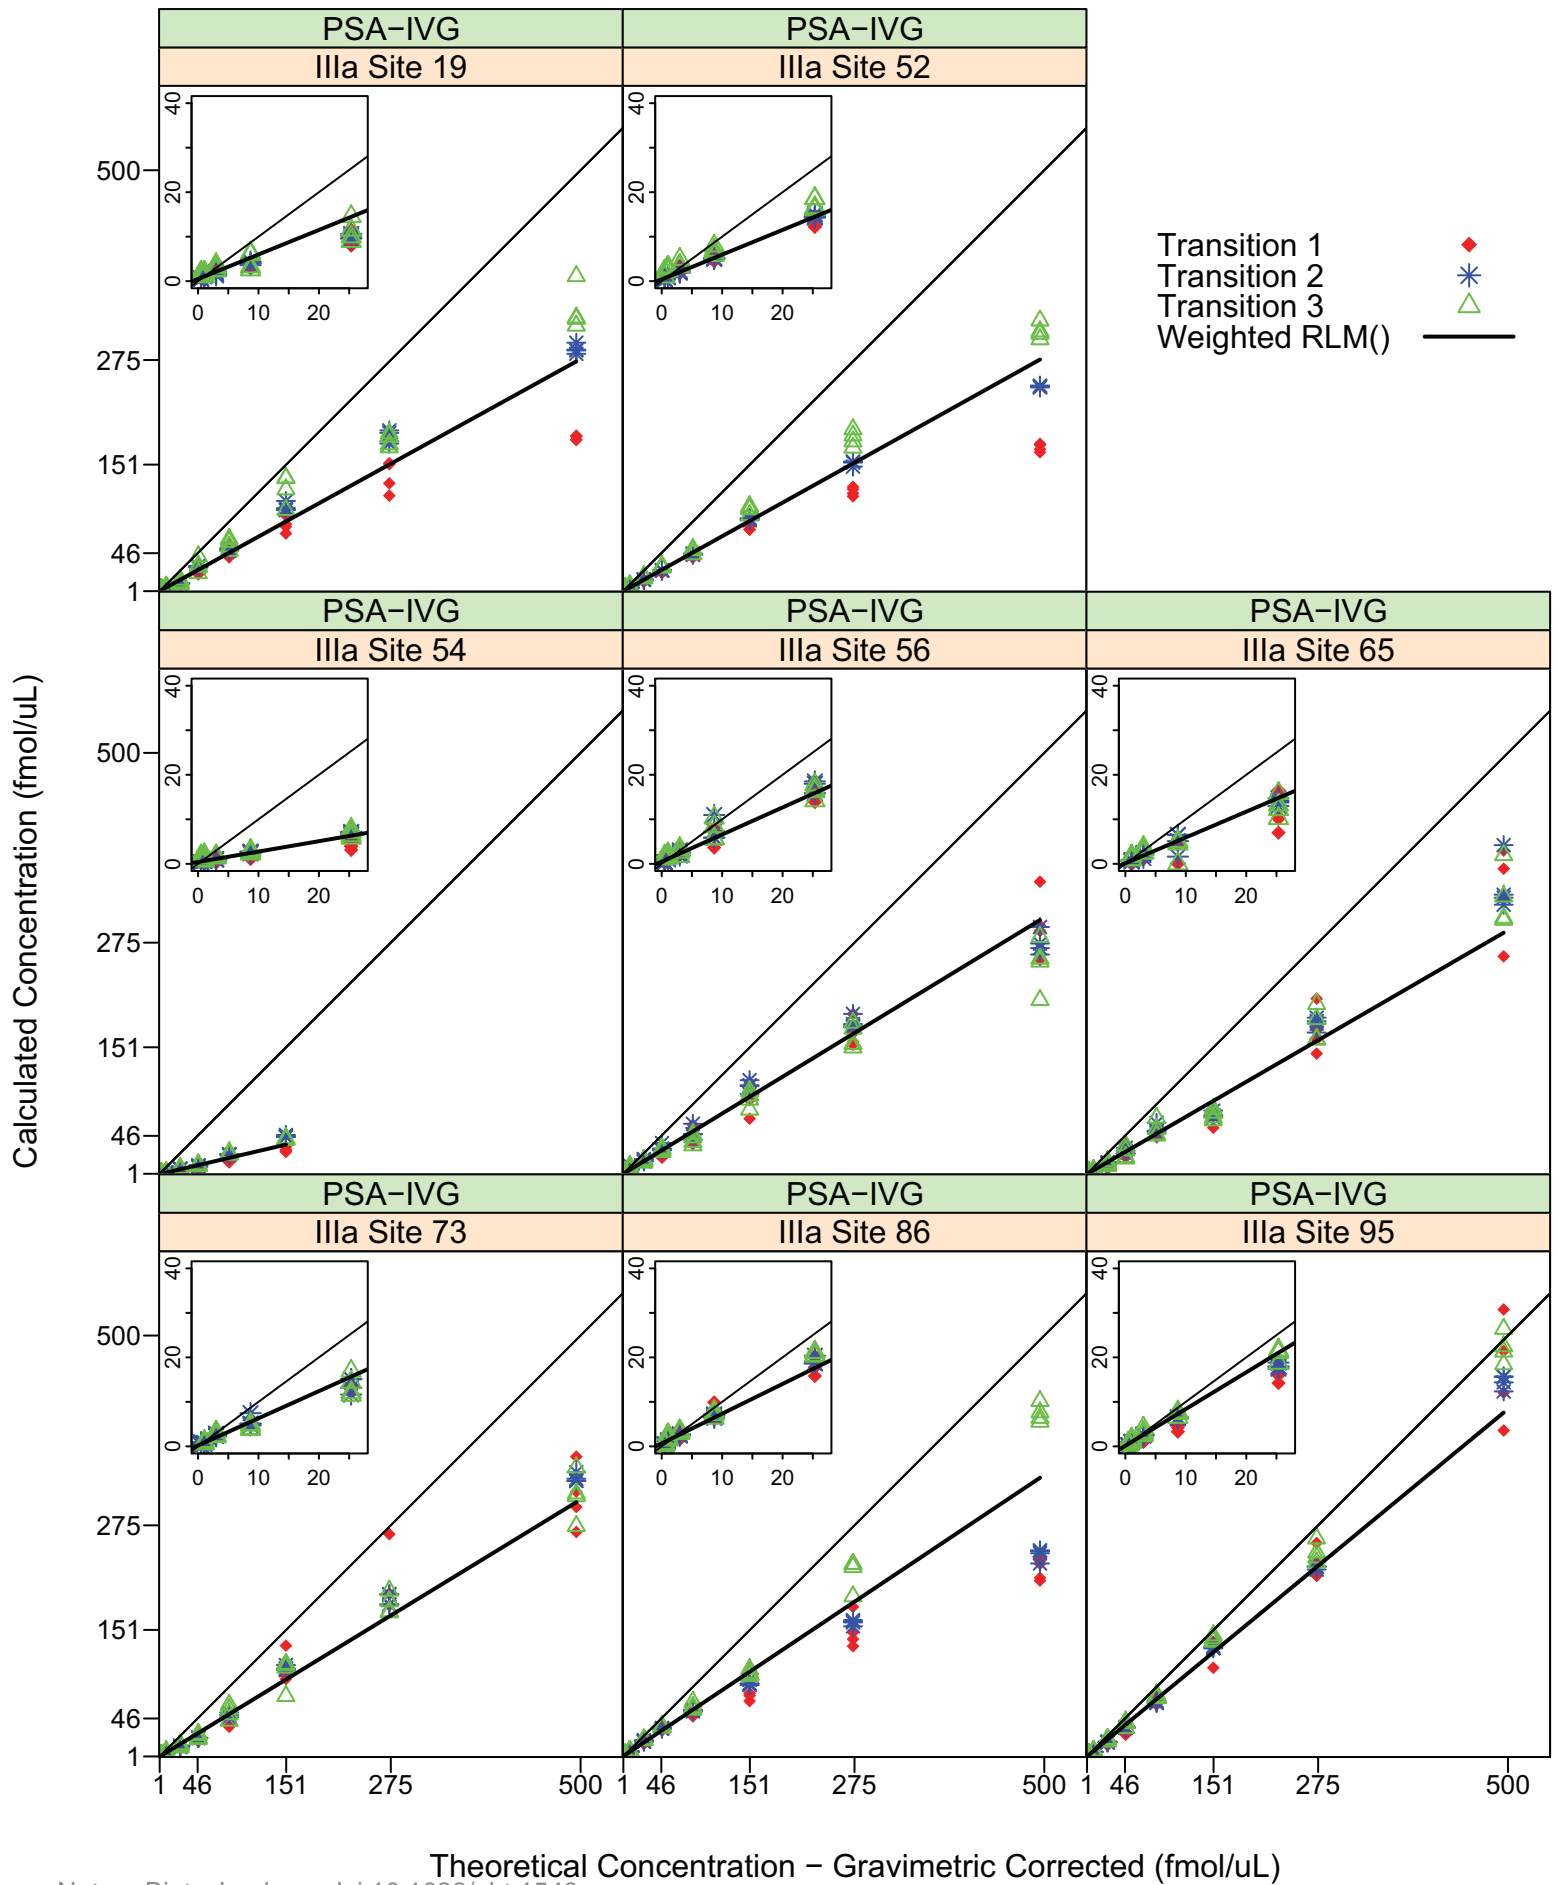

Theoretical Concentration - Gravimetric Corrected (fmol/uL)

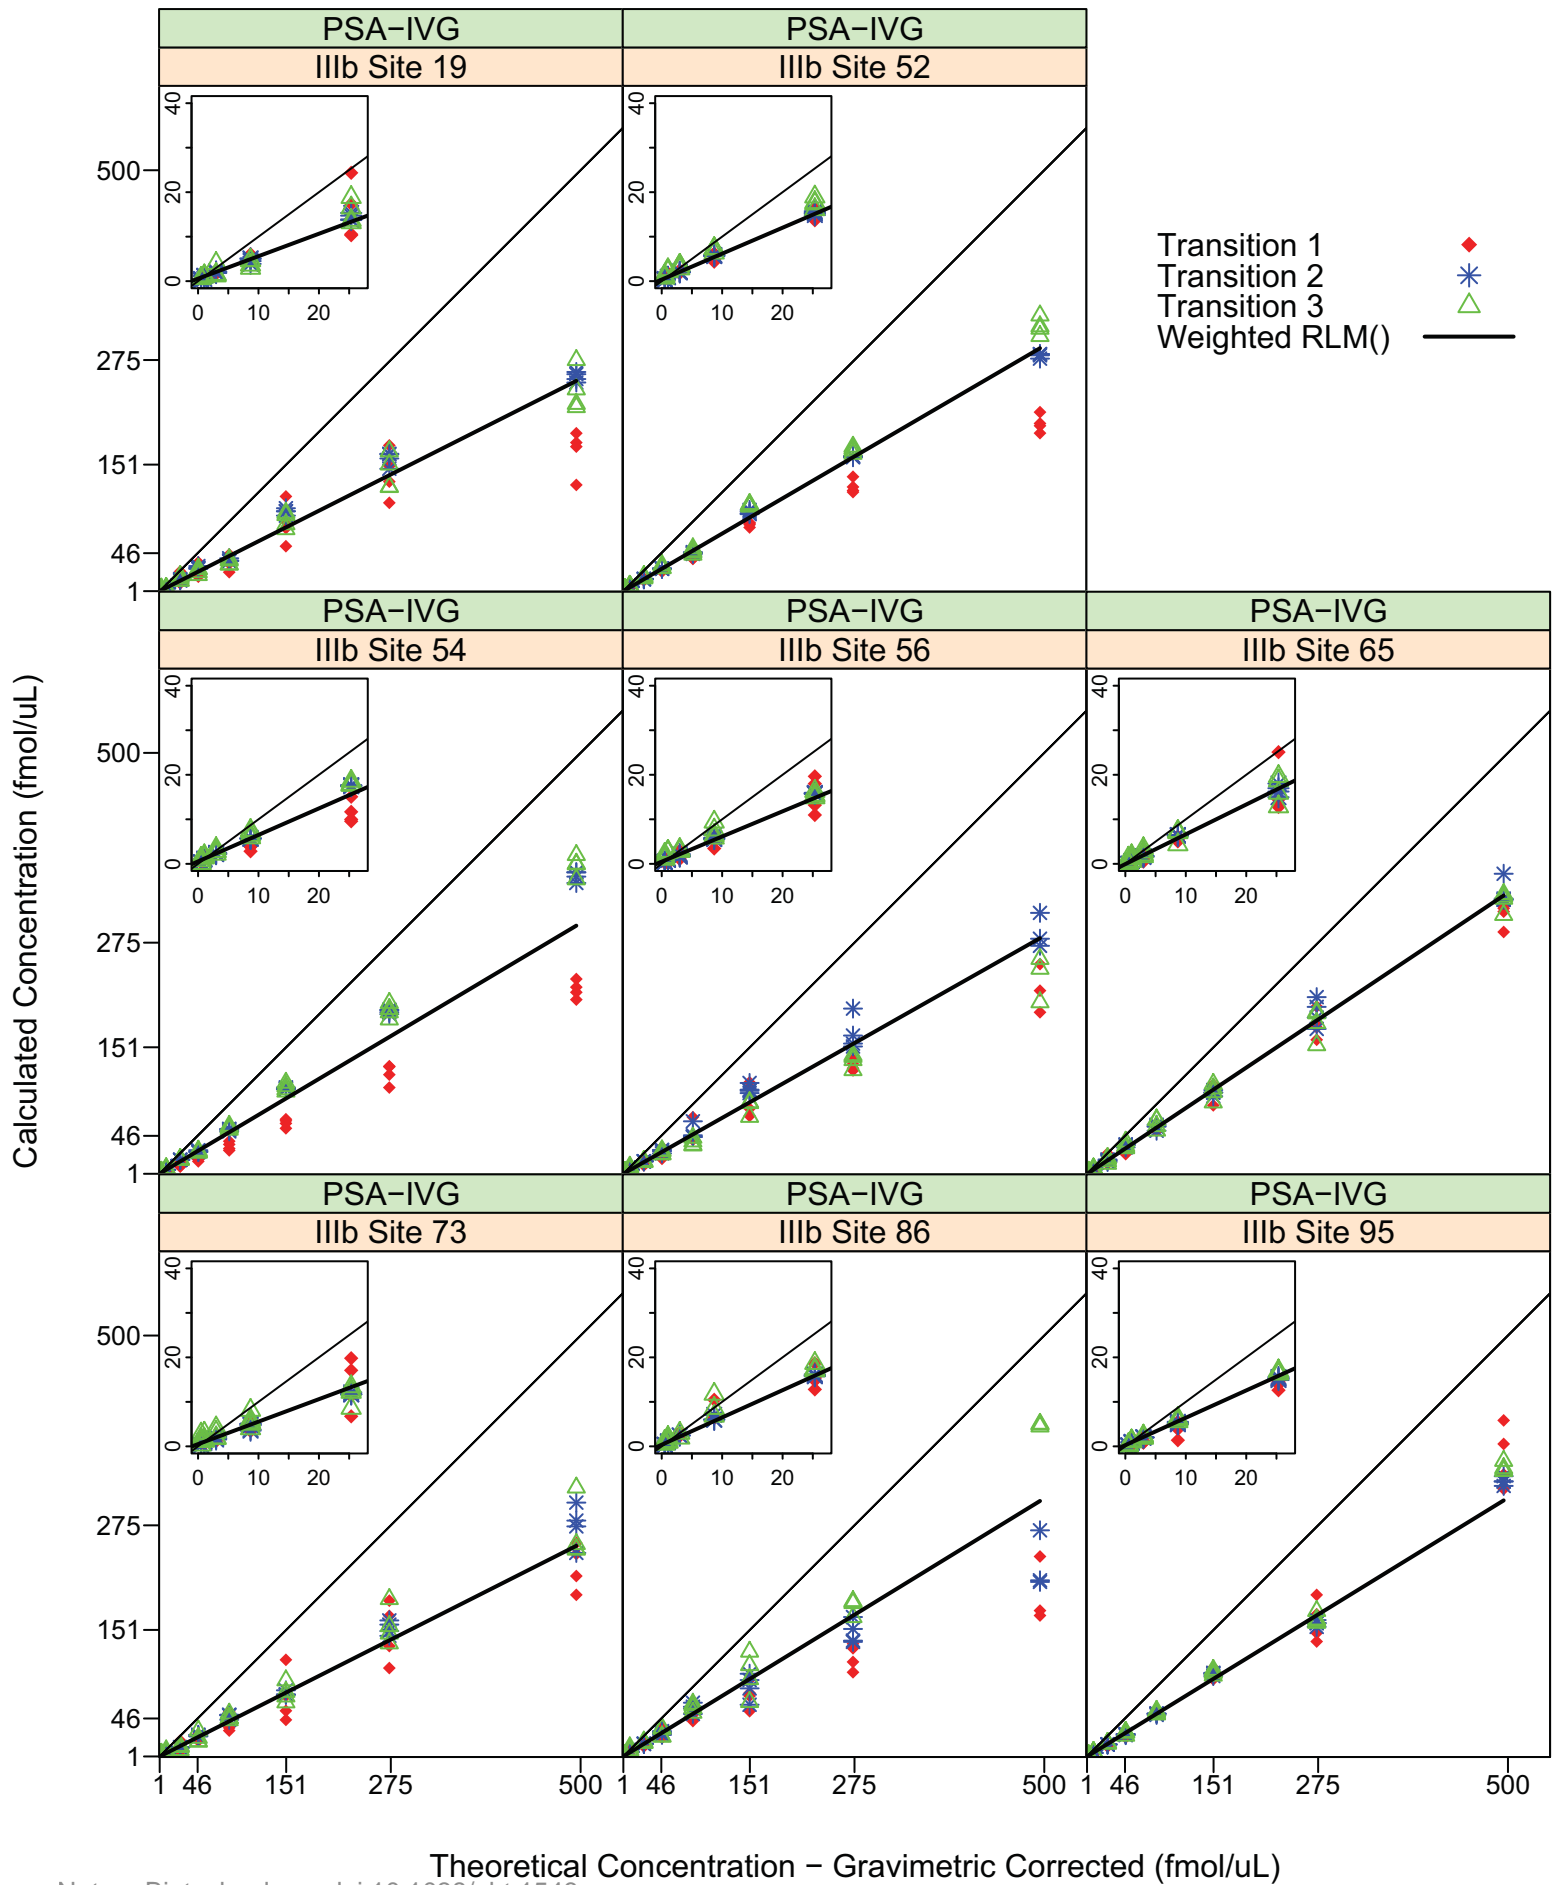

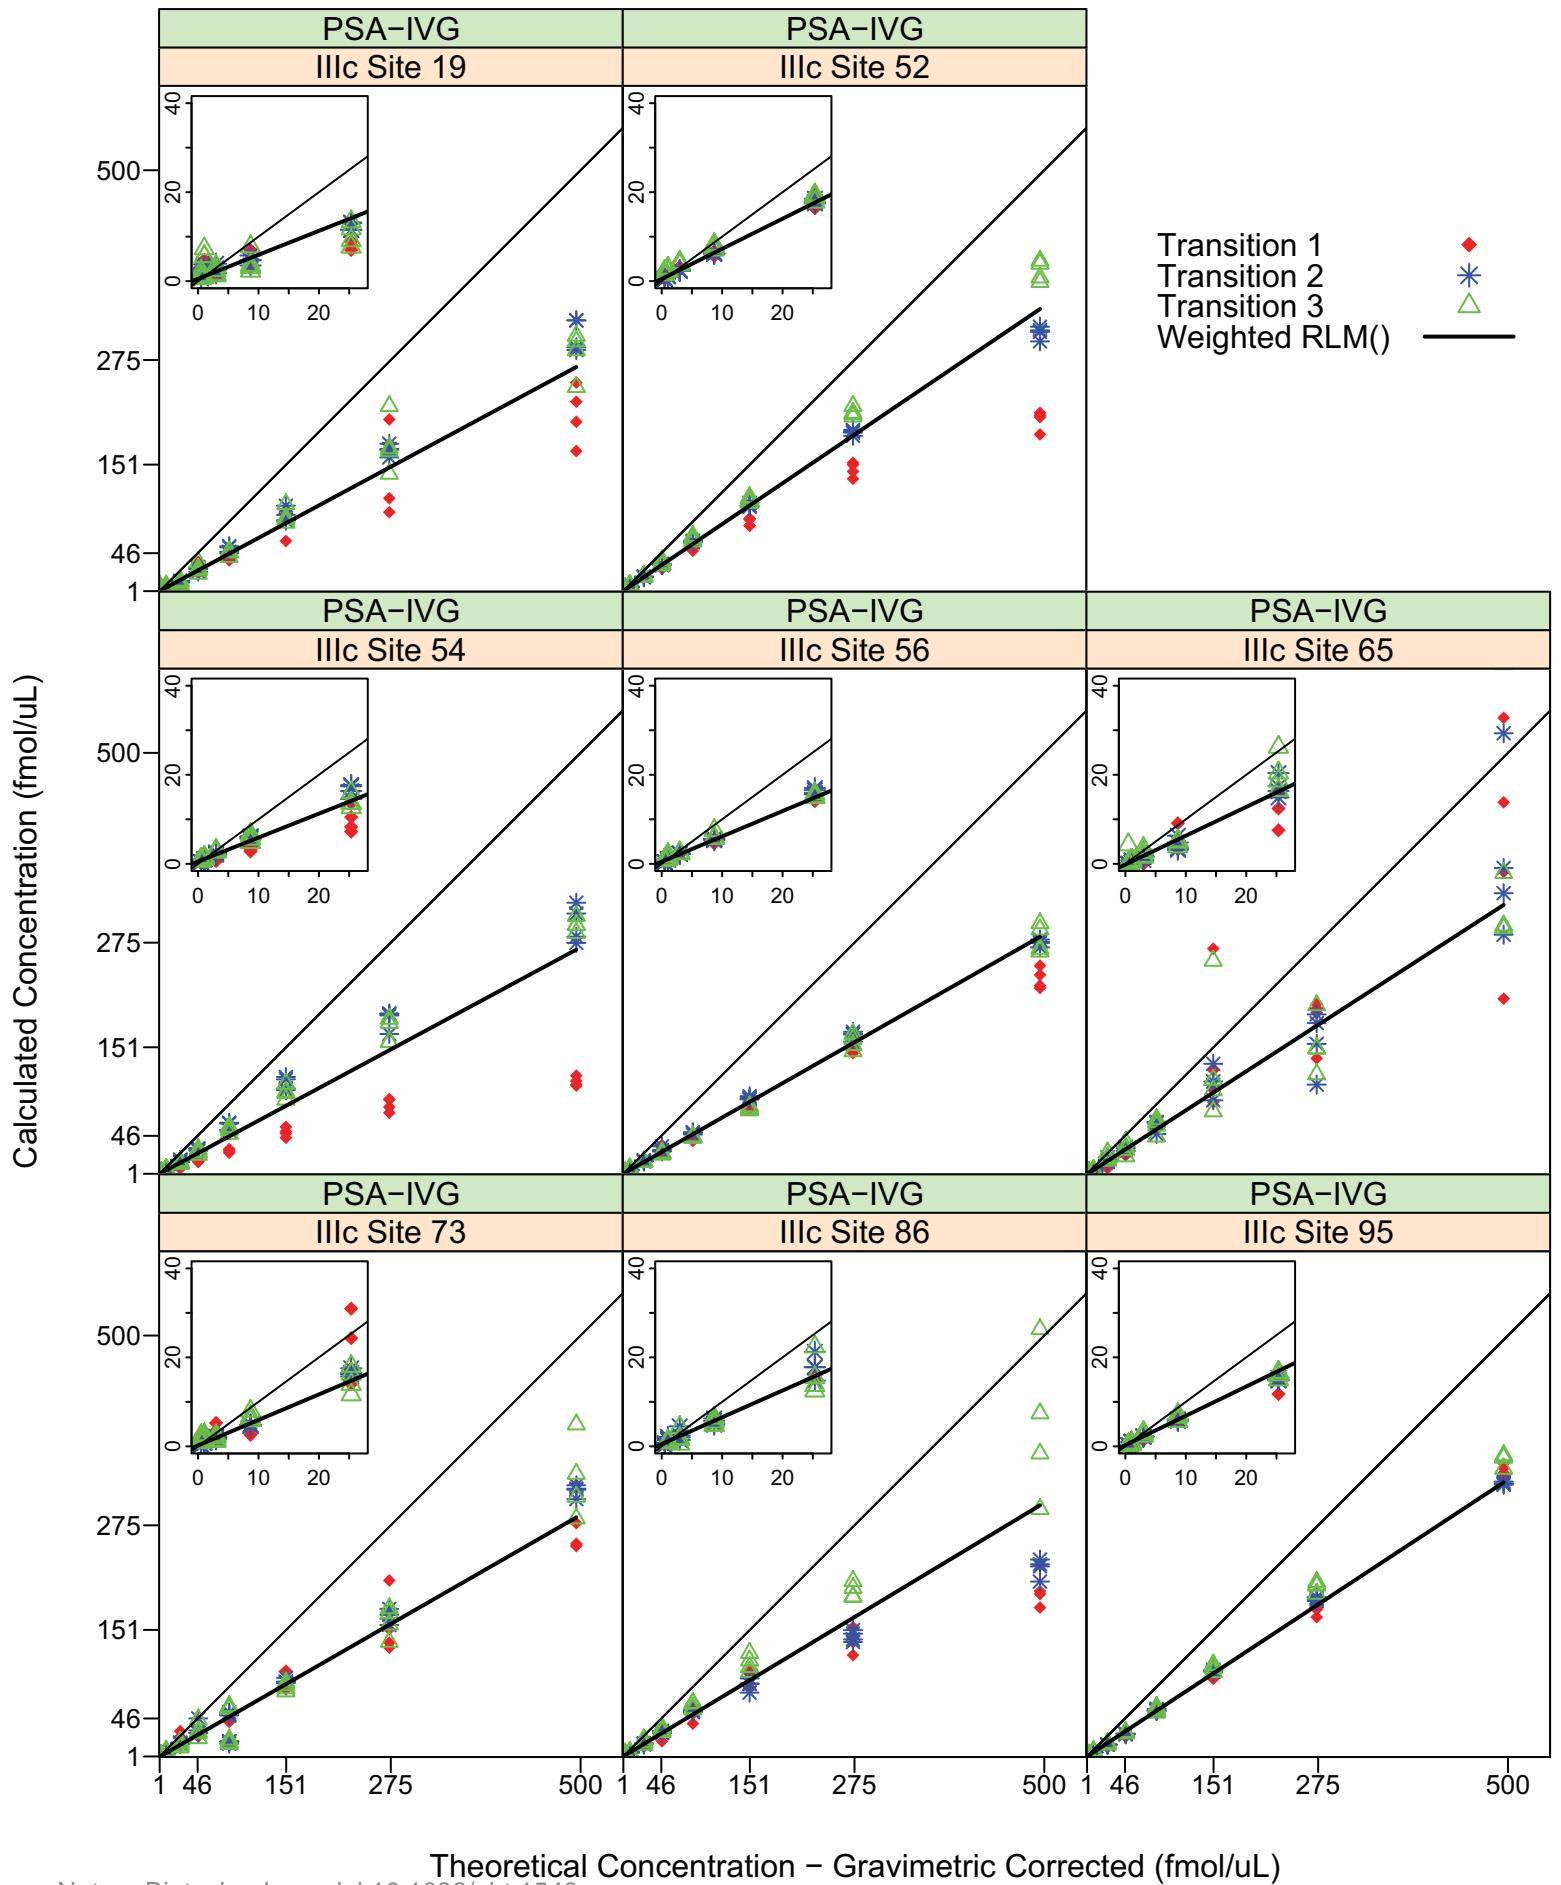

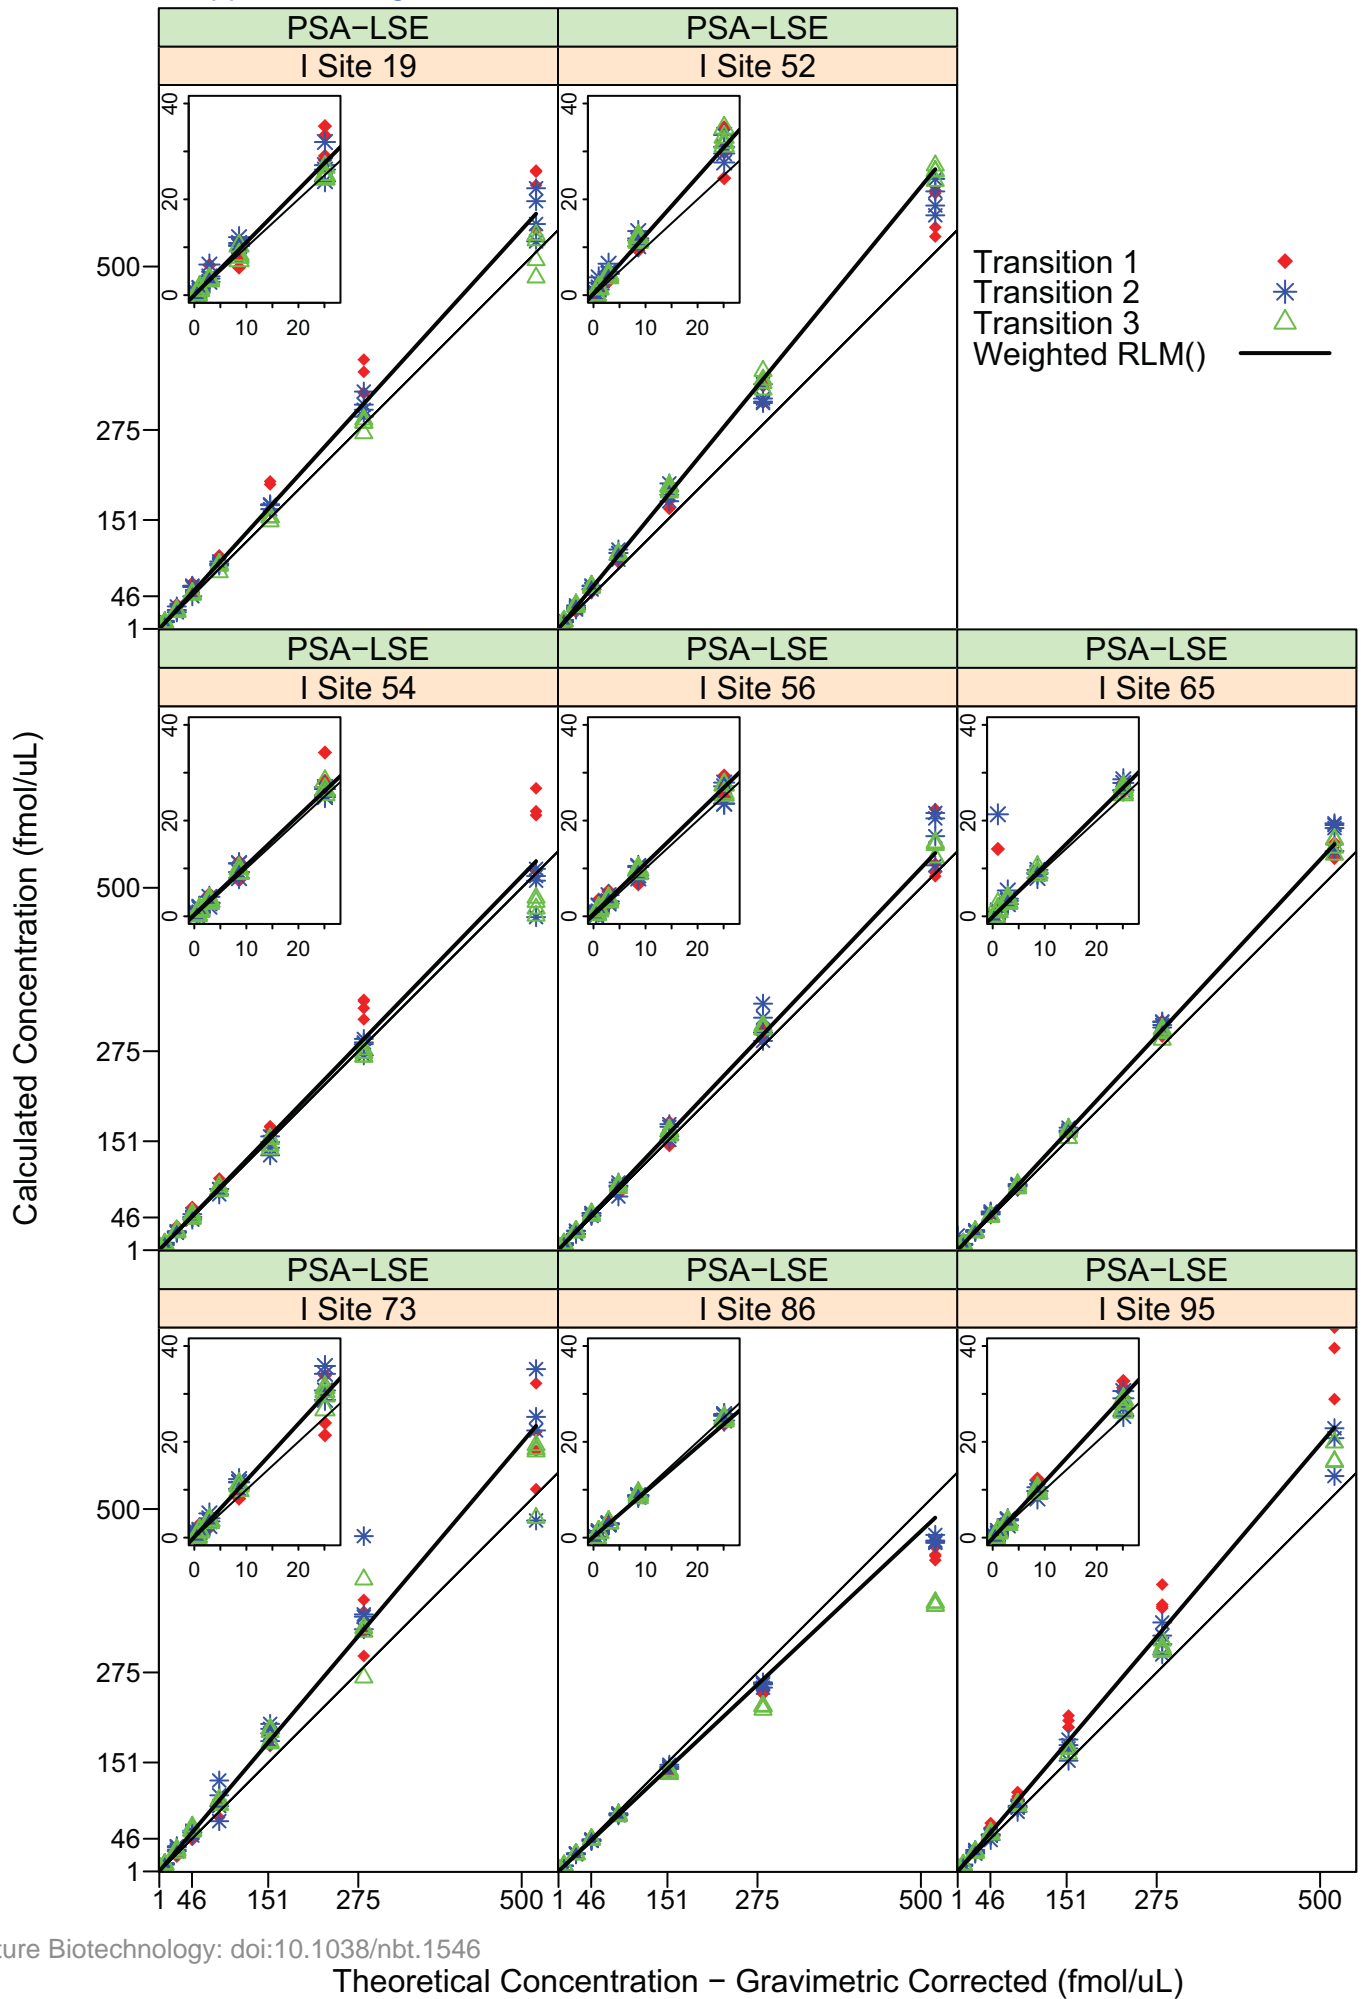

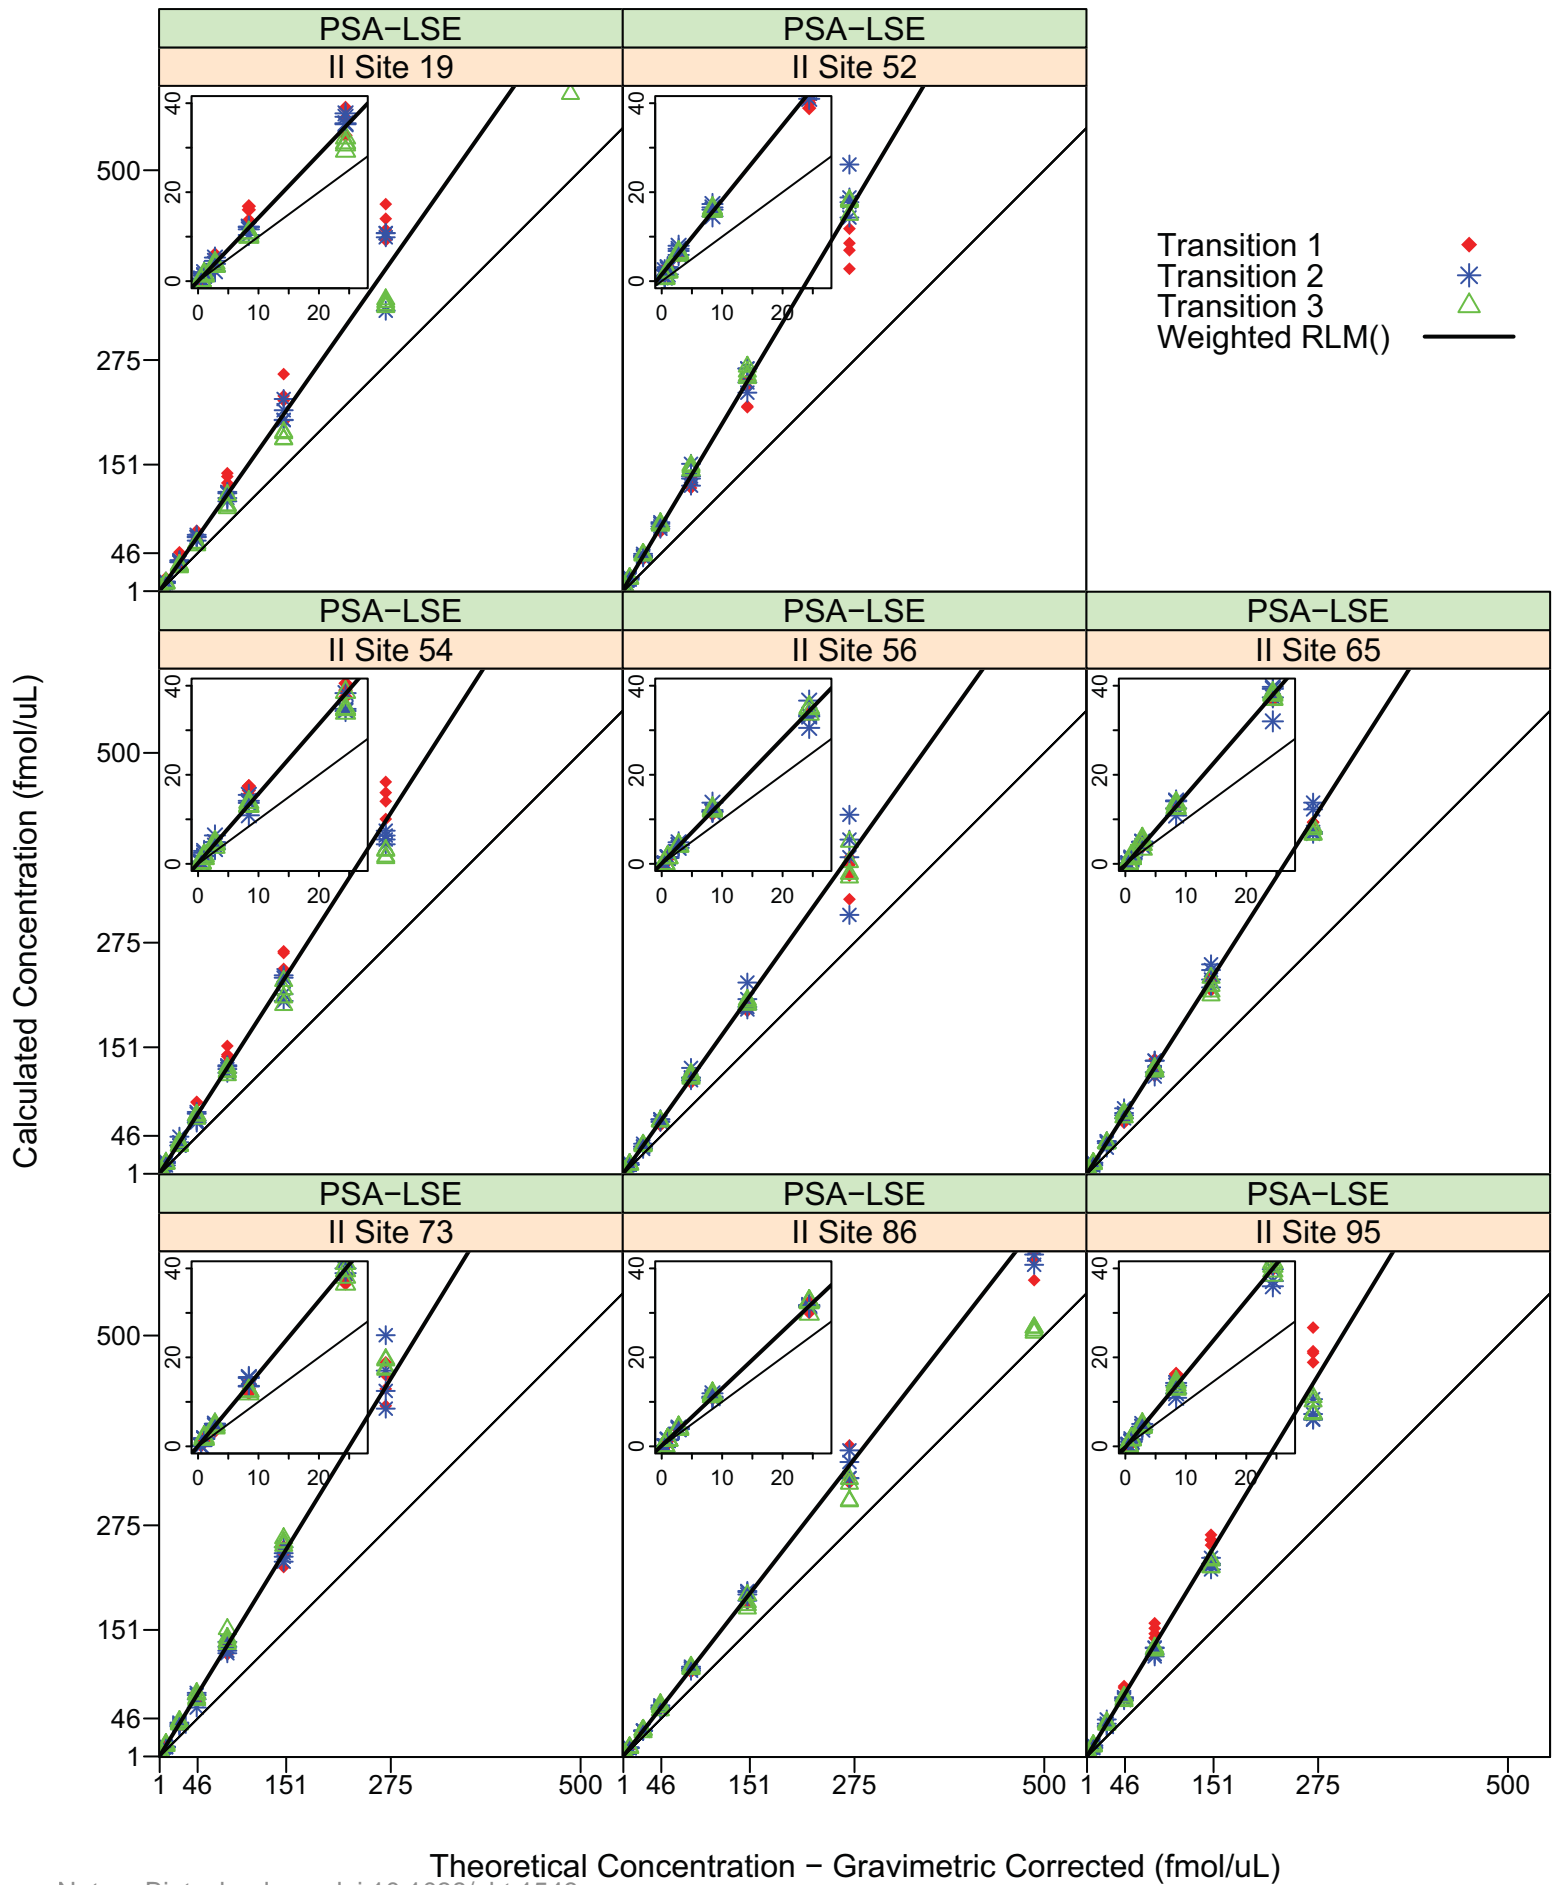



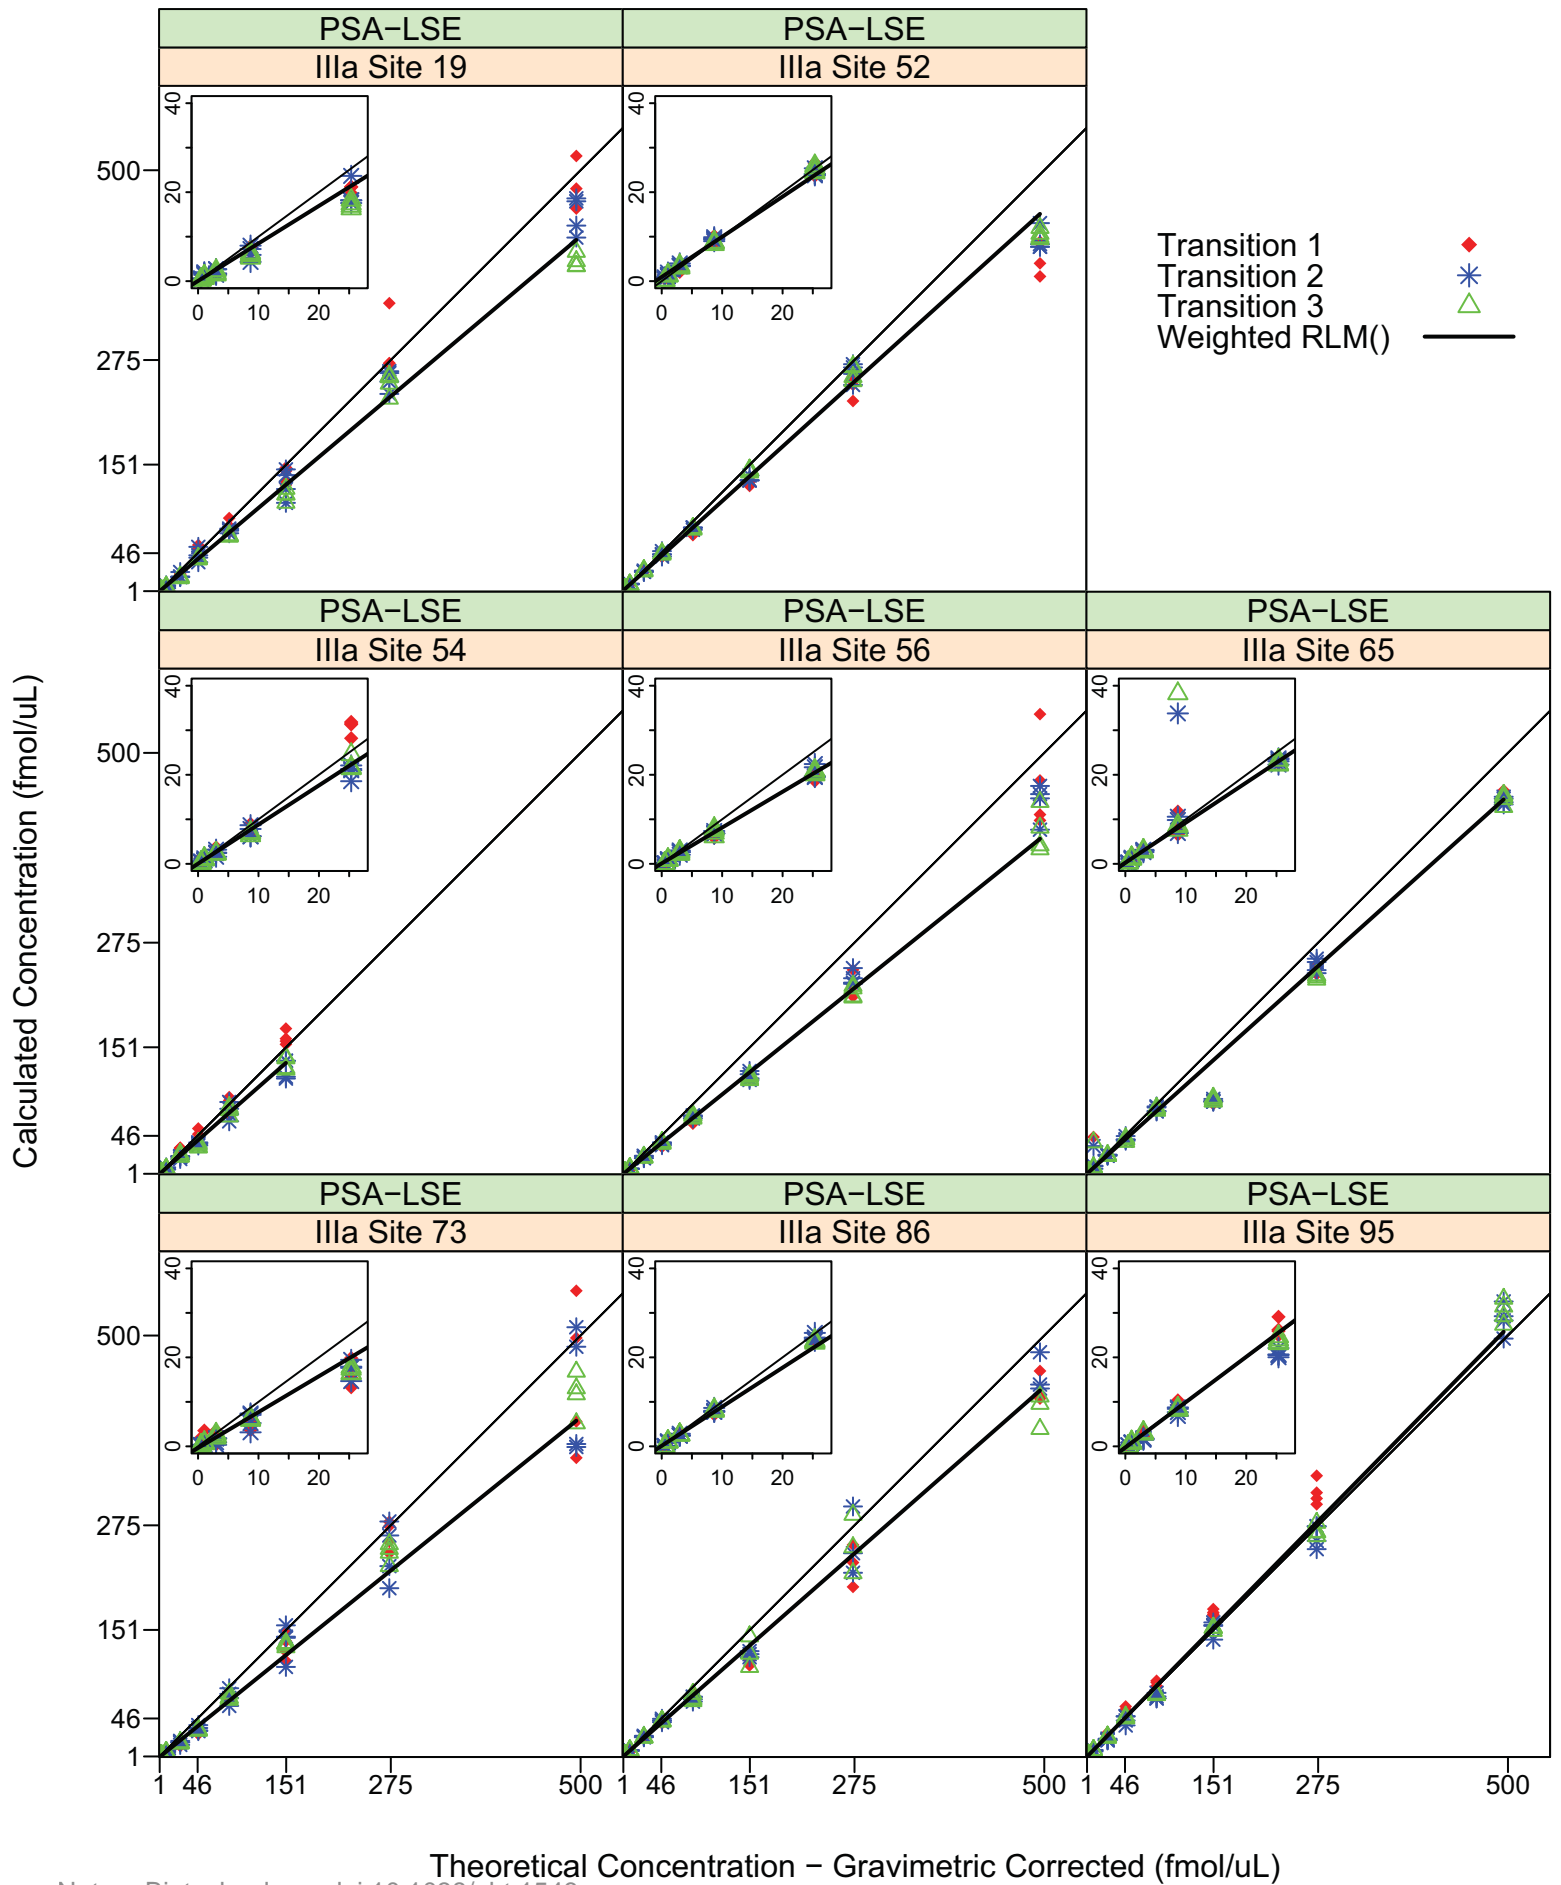

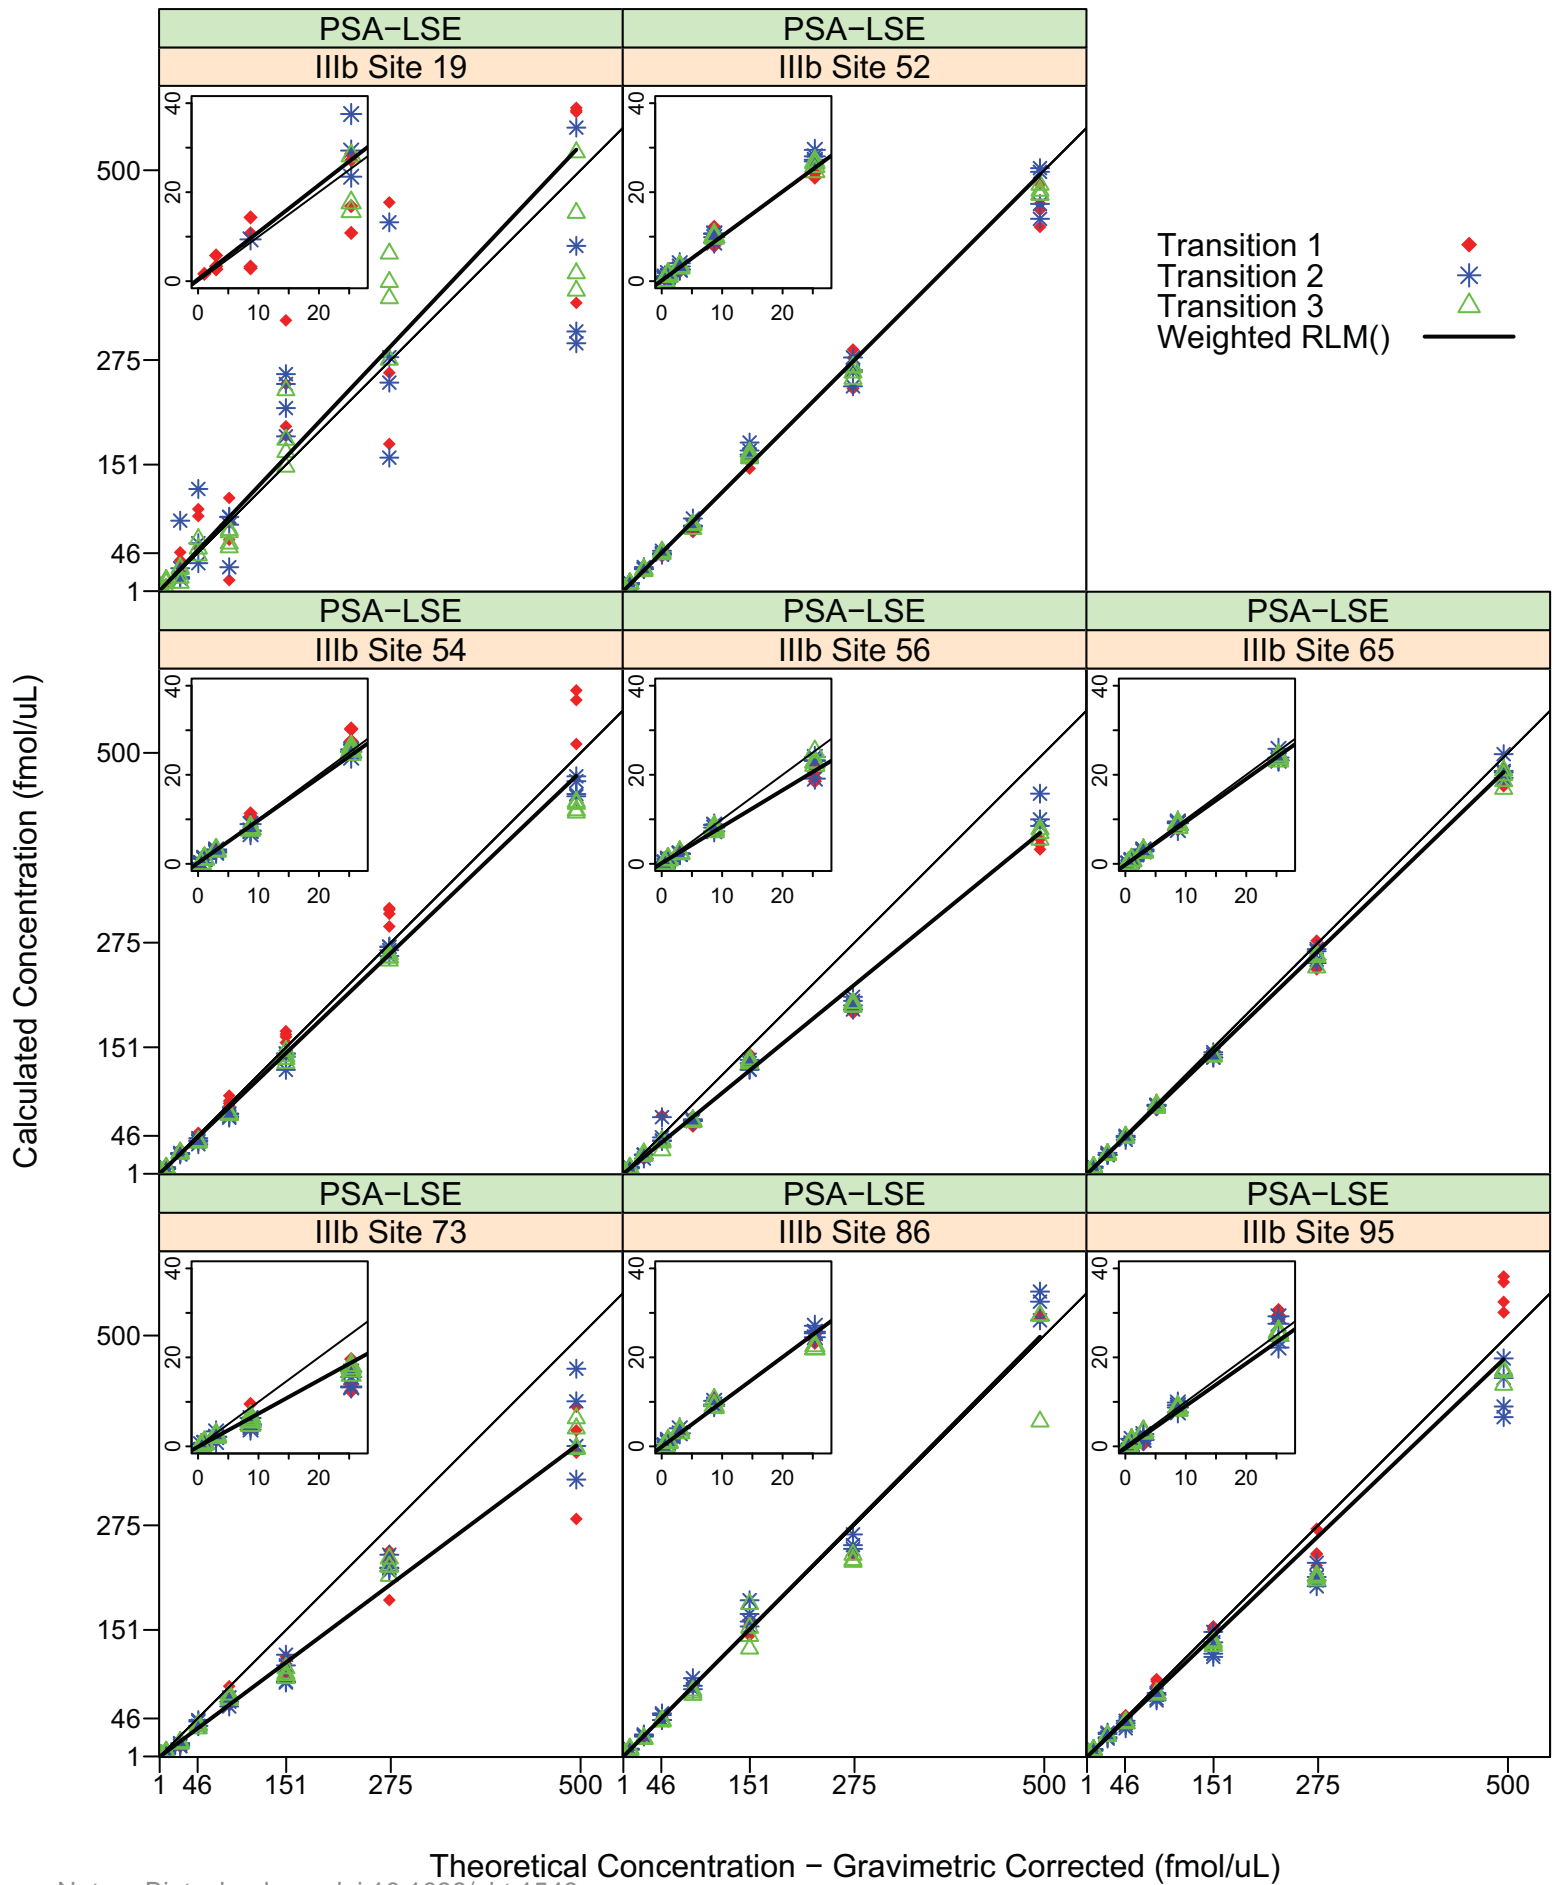

Theoretical Concentration - Gravimetric Corrected (fmol/uL)

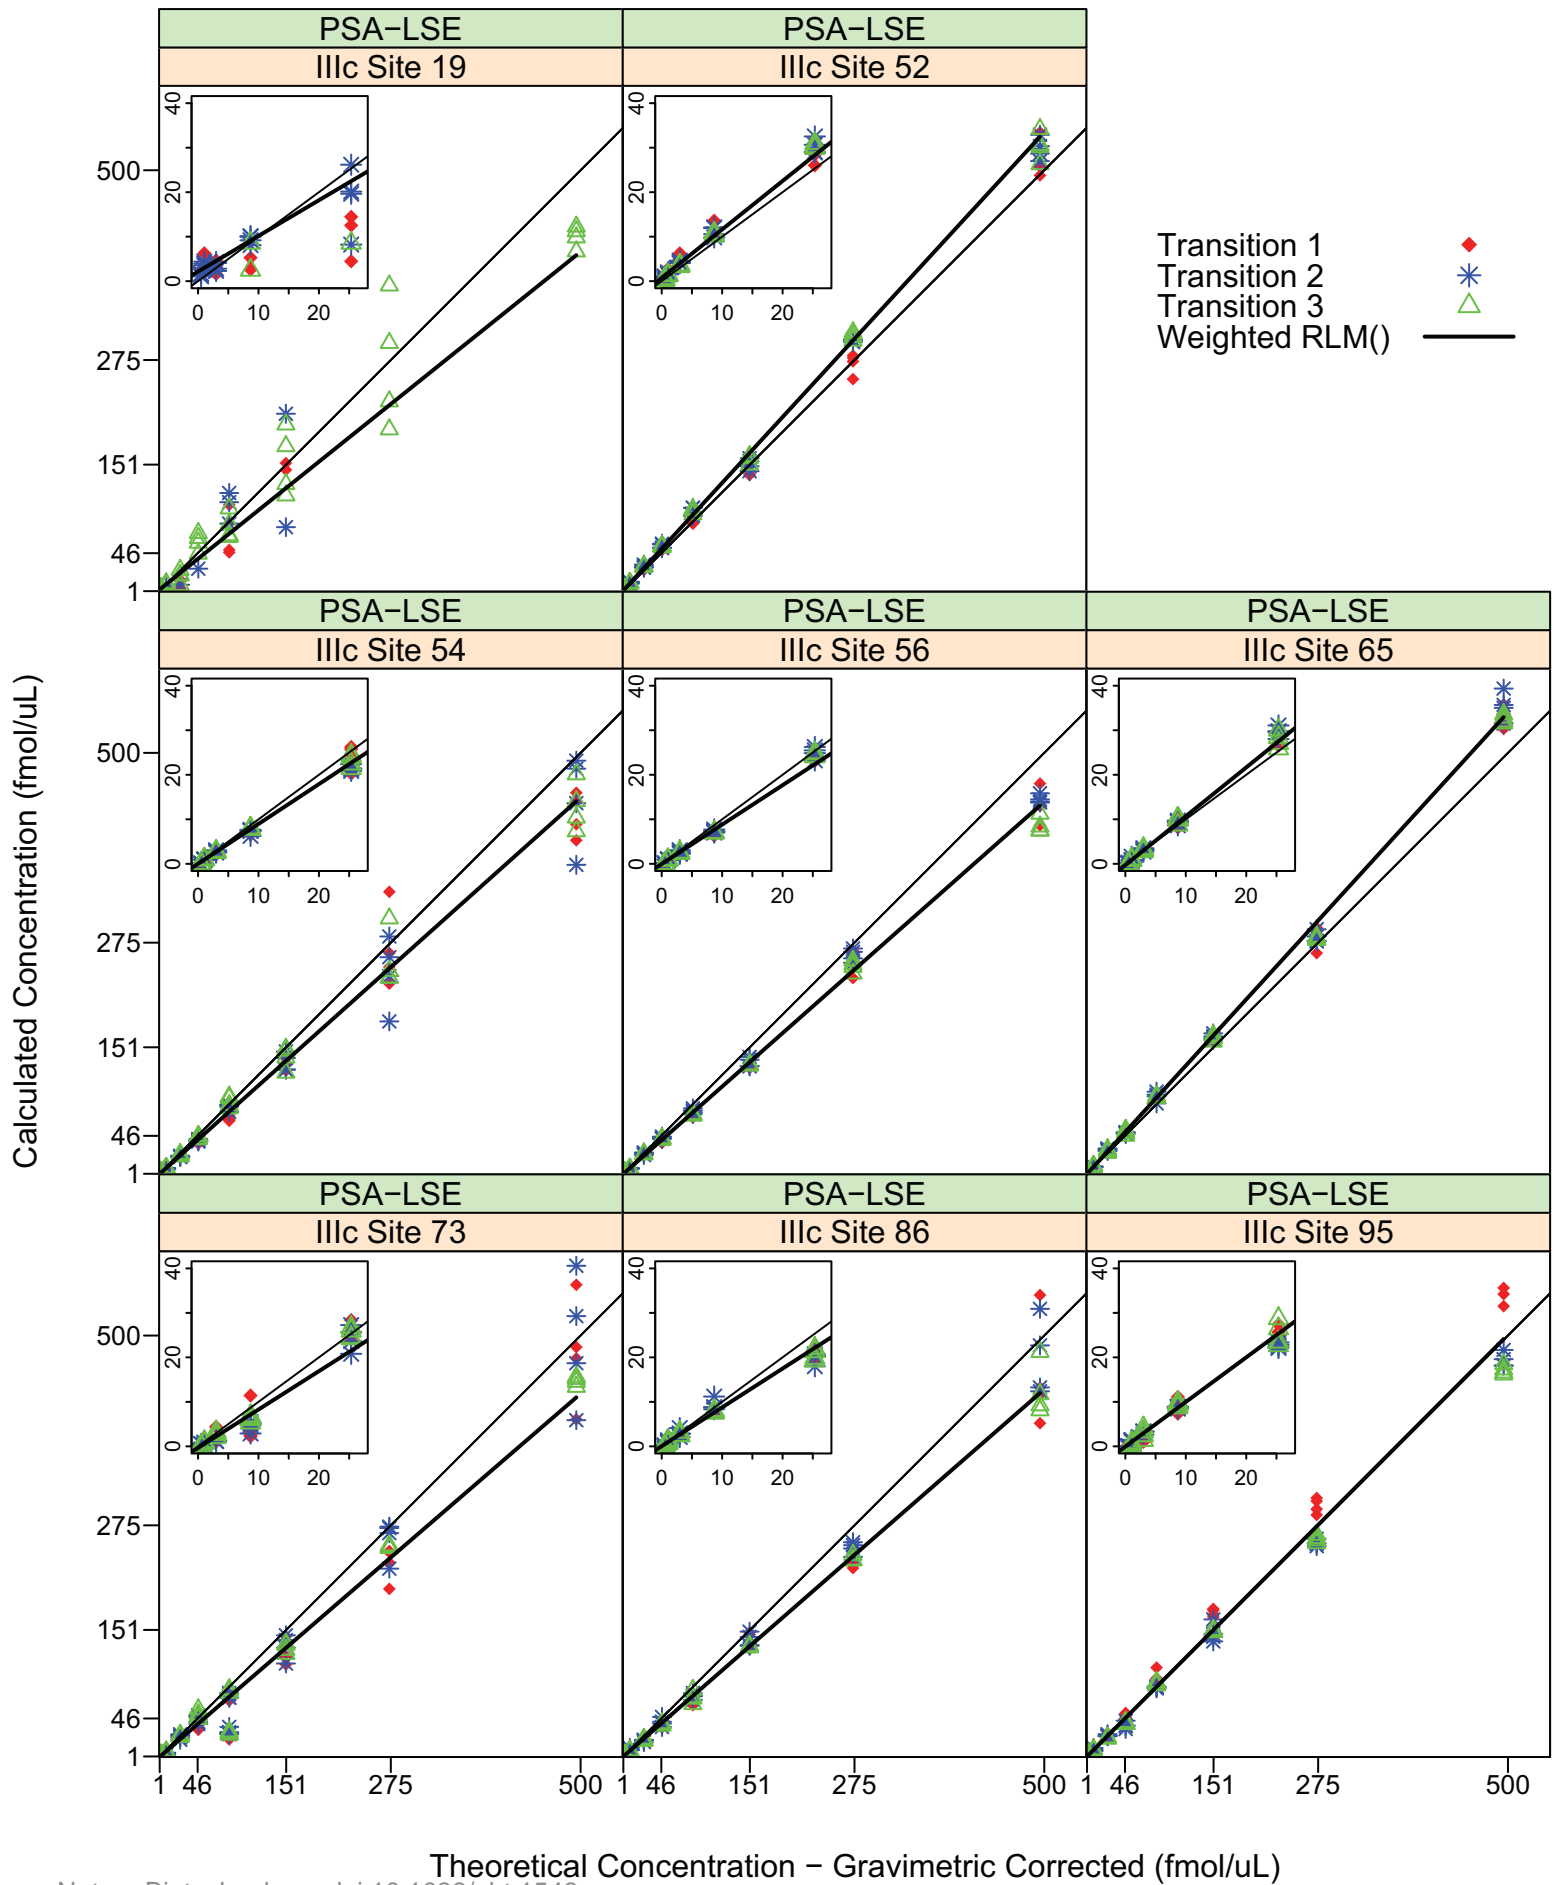

Theoretical Concentration - Gravimetric Corrected (fmol/uL)

**Supplementary Figure 6:** Inter-lab reproducibility of linear calibration curve slopes and percent recovery representation for Study I, II, and IIIa-c. The graphs display the linear slope values for each peptide and are color coded to indicate each participating site. The apex of each Gaussian peak is the linear calibration curve slope point estimate, and the width of each peak represents the standard error of that value. Study I and II data represent single process replicates acquired using quadruplicate injections, while Study III represents the average of three process replicates, also using quadruplicate injections. Note that in most cases, the Gaussian curves overlay well, but the width of their distribution increases from Study I to II to III. In addition, the value of the linear slope decreases with each subsequent study. These data indicate good reproducibility both intra- and inter-laboratory, and visualize the incidence of both sample loss and increased variance with increased sample handling. Peptide MBP-YLA was not observed by any site in Study III. The broad distribution of the APR-AGL and PSA-IVG peptides in Study III for site 54 was due to one process replicate in which the peptide was not detected.

### Study I

### Study II

### Study III

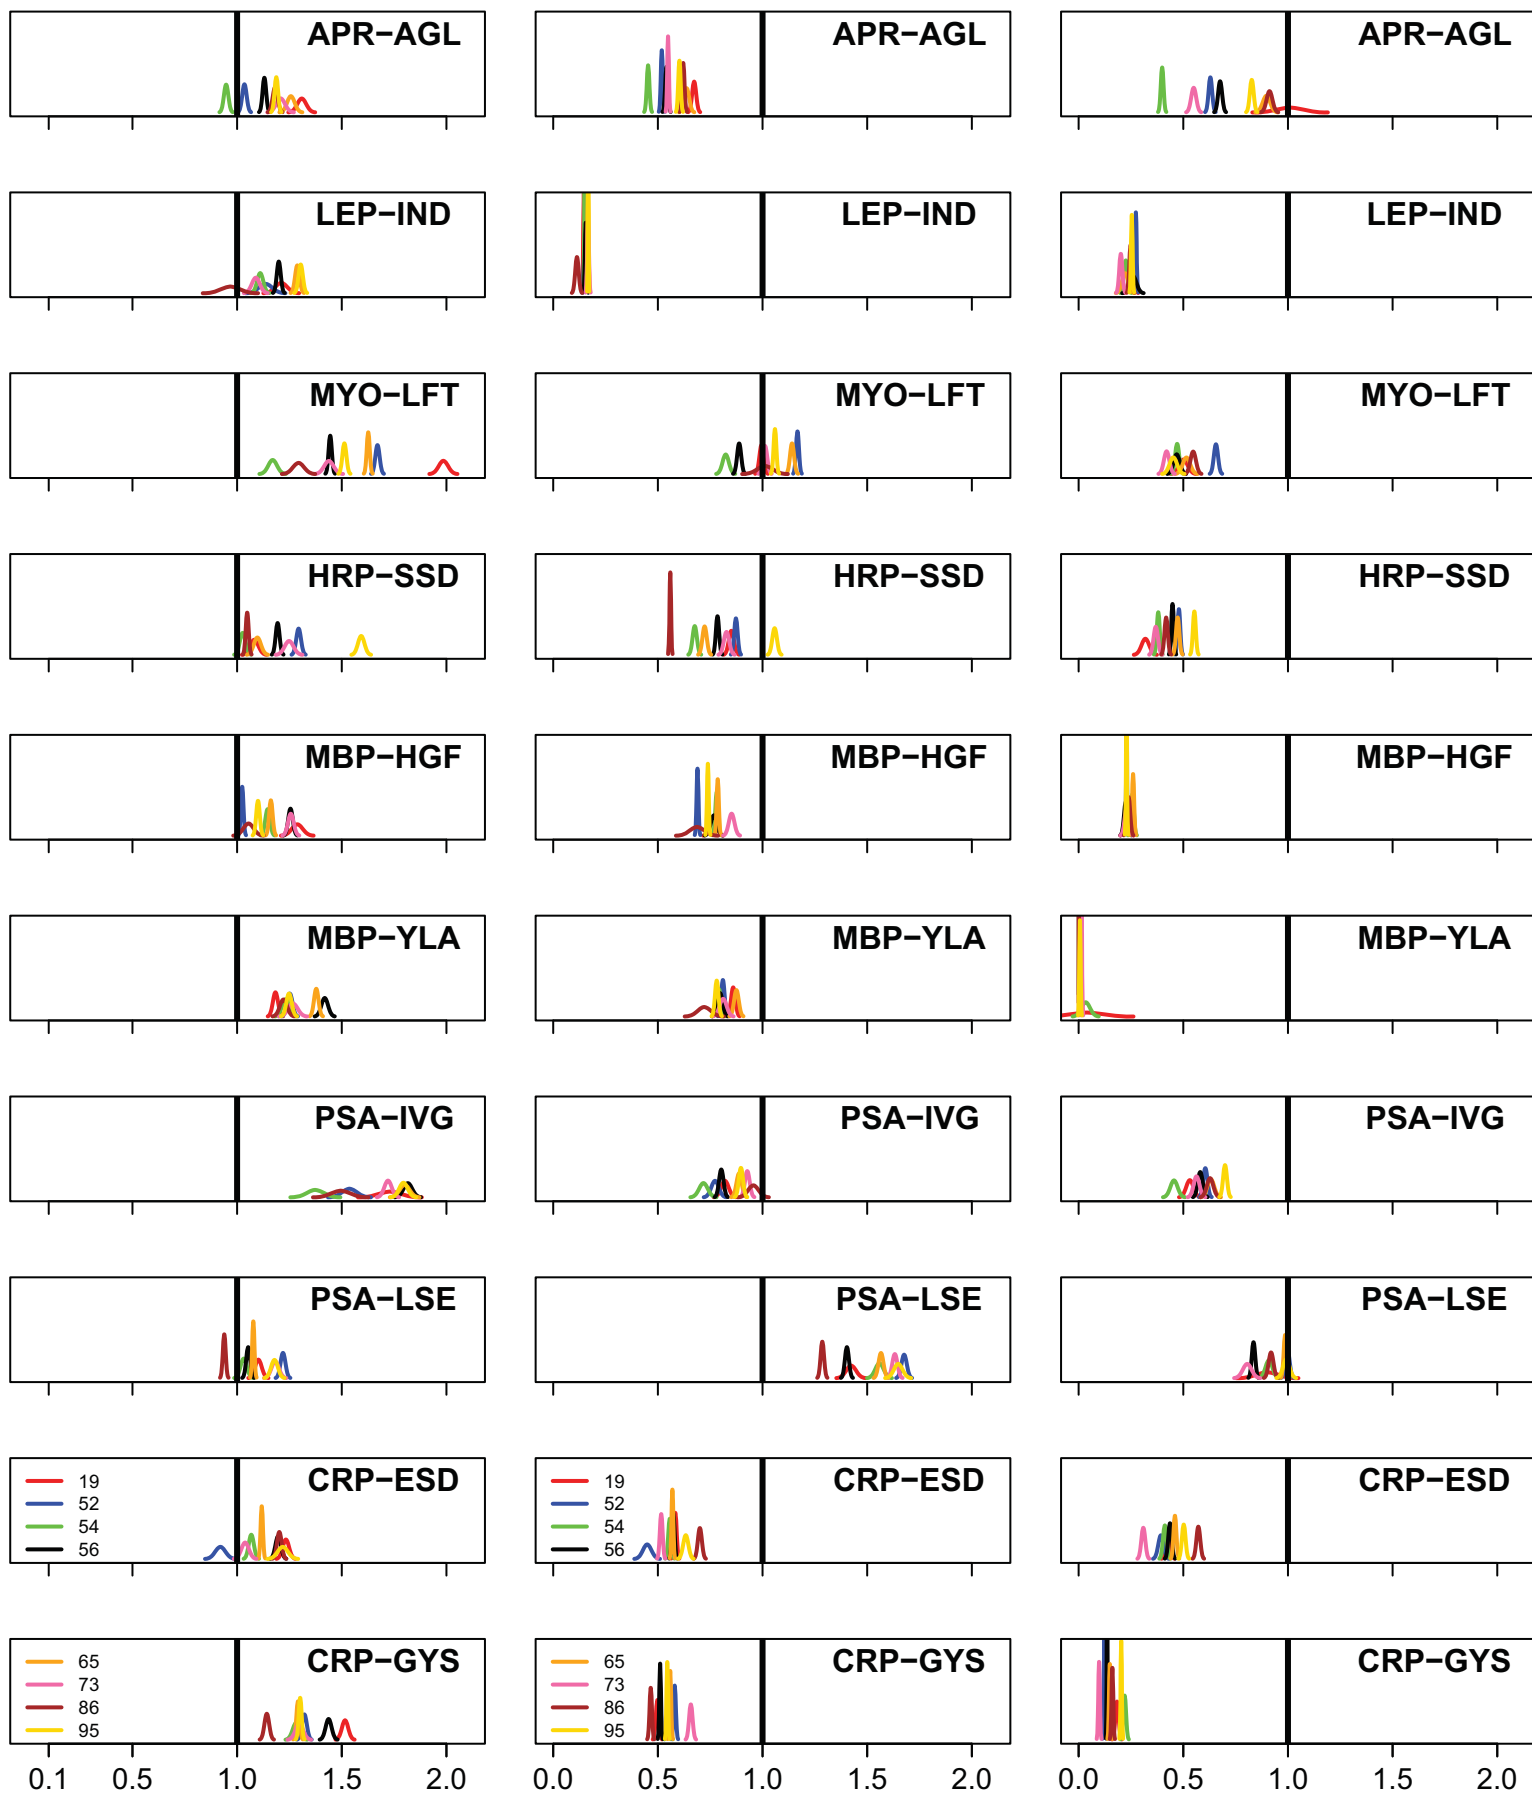

Linear Slope

Linear Slope

Linear Slope

**Supplementary Table 5:** % Recovery at individual concentration points (representative examples)  
(examples for peptide APR-AGL at sites 52 and 56 for Studies I, II, and IIIa-c)

| Study I         |         |        |            |                  |                  |
|-----------------|---------|--------|------------|------------------|------------------|
| spike (fmol/uL) | Peptide | Sample | Transition | Percent Recovery | Percent Recovery |
|                 |         |        |            | site 52          | site 56          |
| 1               | APR-AGL | B      | 1          | 213.0%           | 205.0%           |
| 2.92            | APR-AGL | C      | 1          | 138.0%           | 128.0%           |
| 8.55            | APR-AGL | D      | 1          | 118.0%           | 130.0%           |
| 25              | APR-AGL | E      | 1          | 110.0%           | 123.0%           |
| 46              | APR-AGL | F      | 1          | 101.0%           | 118.0%           |
| 95              | APR-AGL | G      | 1          | 109.0%           | 121.0%           |
| 125             | APR-AGL | H      | 1          | 107.0%           | 121.0%           |
| 250             | APR-AGL | I      | 1          | 102.0%           | 114.0%           |
| 500             | APR-AGL | J      | 1          | 99.0%            | 123.0%           |
| 1               | APR-AGL | B      | 2          | 149.0%           | 181.0%           |
| 2.92            | APR-AGL | C      | 2          | 133.0%           | 128.0%           |
| 8.55            | APR-AGL | D      | 2          | 108.0%           | 113.0%           |
| 25              | APR-AGL | E      | 2          | 106.0%           | 113.0%           |
| 46              | APR-AGL | F      | 2          | 102.0%           | 112.0%           |
| 95              | APR-AGL | G      | 2          | 103.0%           | 112.0%           |
| 125             | APR-AGL | H      | 2          | 104.0%           | 112.0%           |
| 250             | APR-AGL | I      | 2          | 102.0%           | 110.0%           |
| 500             | APR-AGL | J      | 2          | 98.0%            | 112.0%           |
| 1               | APR-AGL | B      | 3          | 145.0%           | 213.0%           |
| 2.92            | APR-AGL | C      | 3          | 120.0%           | 145.0%           |
| 8.55            | APR-AGL | D      | 3          | 106.0%           | 121.0%           |
| 25              | APR-AGL | E      | 3          | 108.0%           | 112.0%           |
| 46              | APR-AGL | F      | 3          | 101.0%           | 115.0%           |
| 95              | APR-AGL | G      | 3          | 102.0%           | 115.0%           |
| 125             | APR-AGL | H      | 3          | 103.0%           | 110.0%           |
| 250             | APR-AGL | I      | 3          | 111.0%           | 110.0%           |
| 500             | APR-AGL | J      | 3          | 98.0%            | 110.0%           |

| Study II        |         |        |            |                  |                  |
|-----------------|---------|--------|------------|------------------|------------------|
| spike (fmol/uL) | Peptide | Sample | Transition | Percent Recovery | Percent Recovery |
|                 |         |        |            | site 52          | site 56          |
| 1               | APR-AGL | B      | 1          | 194.0%           | 102.0%           |
| 2.92            | APR-AGL | C      | 1          | 106.0%           | 68.0%            |
| 8.55            | APR-AGL | D      | 1          | 67.0%            | 67.0%            |
| 25              | APR-AGL | E      | 1          | 59.0%            | 61.0%            |
| 46              | APR-AGL | F      | 1          | 57.0%            | 58.0%            |
| 95              | APR-AGL | G      | 1          | 55.0%            | 58.0%            |
| 125             | APR-AGL | H      | 1          | 54.0%            | 43.0%            |
| 250             | APR-AGL | I      | 1          | 53.0%            | 57.0%            |
| 500             | APR-AGL | J      | 1          | 52.0%            | 53.0%            |
| 1               | APR-AGL | B      | 2          | 124.0%           | 86.0%            |
| 2.92            | APR-AGL | C      | 2          | 62.0%            | 66.0%            |
| 8.55            | APR-AGL | D      | 2          | 58.0%            | 61.0%            |
| 25              | APR-AGL | E      | 2          | 51.0%            | 57.0%            |
| 46              | APR-AGL | F      | 2          | 53.0%            | 56.0%            |
| 95              | APR-AGL | G      | 2          | 51.0%            | 59.0%            |
| 125             | APR-AGL | H      | 2          | 52.0%            | 58.0%            |
| 250             | APR-AGL | I      | 2          | 51.0%            | 55.0%            |
| 500             | APR-AGL | J      | 2          | 50.0%            | 53.0%            |
| 1               | APR-AGL | B      | 3          | 114.0%           | 70.0%            |
| 2.92            | APR-AGL | C      | 3          | 84.0%            | 56.0%            |
| 8.55            | APR-AGL | D      | 3          | 60.0%            | 51.0%            |
| 25              | APR-AGL | E      | 3          | 57.0%            | 51.0%            |
| 46              | APR-AGL | F      | 3          | 52.0%            | 53.0%            |
| 95              | APR-AGL | G      | 3          | 51.0%            | 50.0%            |
| 125             | APR-AGL | H      | 3          | 52.0%            | 51.0%            |
| 250             | APR-AGL | I      | 3          | 50.0%            | 47.0%            |
| 500             | APR-AGL | J      | 3          | 50.0%            | 48.0%            |

| Study IIIa      |         |        |            |                  |                  |
|-----------------|---------|--------|------------|------------------|------------------|
| spike (fmol/uL) | Peptide | Sample | Transition | Percent Recovery | Percent Recovery |
|                 |         |        |            | site 52          | site 56          |
| 1               | APR-AGL | B      | 1          | 98.0%            | 103.0%           |
| 2.92            | APR-AGL | C      | 1          | 76.0%            | 89.0%            |
| 8.55            | APR-AGL | D      | 1          | 70.0%            | 77.0%            |
| 25              | APR-AGL | E      | 1          | 67.0%            | 73.0%            |
| 46              | APR-AGL | F      | 1          | 63.0%            | 71.0%            |
| 95              | APR-AGL | G      | 1          | 58.0%            | 70.0%            |
| 125             | APR-AGL | H      | 1          | 58.0%            | 67.0%            |
| 250             | APR-AGL | I      | 1          | 55.0%            | 69.0%            |
| 500             | APR-AGL | J      | 1          | 28.0%            | 63.0%            |
| 1               | APR-AGL | B      | 2          | 89.0%            | 90.0%            |
| 2.92            | APR-AGL | C      | 2          | 73.0%            | 84.0%            |
| 8.55            | APR-AGL | D      | 2          | 67.0%            | 74.0%            |
| 25              | APR-AGL | E      | 2          | 62.0%            | 74.0%            |
| 46              | APR-AGL | F      | 2          | 59.0%            | 70.0%            |
| 95              | APR-AGL | G      | 2          | 53.0%            | 70.0%            |
| 125             | APR-AGL | H      | 2          | 55.0%            | 66.0%            |
| 250             | APR-AGL | I      | 2          | 54.0%            | 66.0%            |
| 500             | APR-AGL | J      | 2          | 27.0%            | 62.0%            |
| 1               | APR-AGL | B      | 3          | 152.0%           | 80.0%            |
| 2.92            | APR-AGL | C      | 3          | 73.0%            | 80.0%            |
| 8.55            | APR-AGL | D      | 3          | 68.0%            | 72.0%            |
| 25              | APR-AGL | E      | 3          | 62.0%            | 66.0%            |
| 46              | APR-AGL | F      | 3          | 60.0%            | 63.0%            |
| 95              | APR-AGL | G      | 3          | 56.0%            | 62.0%            |
| 125             | APR-AGL | H      | 3          | 53.0%            | 59.0%            |
| 250             | APR-AGL | I      | 3          | 53.0%            | 59.0%            |
| 500             | APR-AGL | J      | 3          | 27.0%            | 54.0%            |

| Study IIIb      |         |        |            |                  |                  |
|-----------------|---------|--------|------------|------------------|------------------|
| spike (fmol/uL) | Peptide | Sample | Transition | Percent Recovery | Percent Recovery |
|                 |         |        |            | site 52          | site 56          |
| 1               | APR-AGL | B      | 1          | 96.0%            | 113.0%           |
| 2.92            | APR-AGL | C      | 1          | 79.0%            | 78.0%            |
| 8.55            | APR-AGL | D      | 1          | 76.0%            | 80.0%            |
| 25              | APR-AGL | E      | 1          | 69.0%            | 73.0%            |
| 46              | APR-AGL | F      | 1          | 67.0%            | 64.0%            |
| 95              | APR-AGL | G      | 1          | 62.0%            | 63.0%            |
| 125             | APR-AGL | H      | 1          | 64.0%            | 72.0%            |
| 250             | APR-AGL | I      | 1          | 59.0%            | 60.0%            |
| 500             | APR-AGL | J      | 1          | 55.0%            | 59.0%            |
| 1               | APR-AGL | B      | 2          | 104.0%           | 99.0%            |
| 2.92            | APR-AGL | C      | 2          | 79.0%            | 76.0%            |
| 8.55            | APR-AGL | D      | 2          | 71.0%            | 78.0%            |
| 25              | APR-AGL | E      | 2          | 69.0%            | 76.0%            |
| 46              | APR-AGL | F      | 2          | 65.0%            | 72.0%            |
| 95              | APR-AGL | G      | 2          | 61.0%            | 62.0%            |
| 125             | APR-AGL | H      | 2          | 65.0%            | 69.0%            |
| 250             | APR-AGL | I      | 2          | 55.0%            | 58.0%            |
| 500             | APR-AGL | J      | 2          | 53.0%            | 57.0%            |
| 1               | APR-AGL | B      | 3          | 161.0%           | 94.0%            |
| 2.92            | APR-AGL | C      | 3          | 90.0%            | 68.0%            |
| 8.55            | APR-AGL | D      | 3          | 78.0%            | 70.0%            |
| 25              | APR-AGL | E      | 3          | 72.0%            | 65.0%            |
| 46              | APR-AGL | F      | 3          | 69.0%            | 77.0%            |
| 95              | APR-AGL | G      | 3          | 63.0%            | 54.0%            |
| 125             | APR-AGL | H      | 3          | 65.0%            | 62.0%            |
| 250             | APR-AGL | I      | 3          | 56.0%            | 53.0%            |
| 500             | APR-AGL | J      | 3          | 53.0%            | 50.0%            |

| Study IIIc      |         |        |            |                  |                  |
|-----------------|---------|--------|------------|------------------|------------------|
| spike (fmol/uL) | Peptide | Sample | Transition | Percent Recovery | Percent Recovery |
|                 |         |        |            | site 52          | site 56          |
| 1               | APR-AGL | B      | 1          | 138.0%           | 117.0%           |
| 2.92            | APR-AGL | C      | 1          | 87.0%            | 91.0%            |
| 8.55            | APR-AGL | D      | 1          | 80.0%            | 79.0%            |
| 25              | APR-AGL | E      | 1          | 80.0%            | 90.0%            |
| 46              | APR-AGL | F      | 1          | 80.0%            | 83.0%            |
| 95              | APR-AGL | G      | 1          | 77.0%            | 76.0%            |
| 125             | APR-AGL | H      | 1          | 71.0%            | 77.0%            |
| 250             | APR-AGL | I      | 1          | 68.0%            | 76.0%            |
| 500             | APR-AGL | J      | 1          | 61.0%            | 68.0%            |
| 1               | APR-AGL | B      | 2          | 115.0%           | 102.0%           |
| 2.92            | APR-AGL | C      | 2          | 80.0%            | 84.0%            |
| 8.55            | APR-AGL | D      | 2          | 81.0%            | 73.0%            |
| 25              | APR-AGL | E      | 2          | 79.0%            | 85.0%            |
| 46              | APR-AGL | F      | 2          | 76.0%            | 80.0%            |
| 95              | APR-AGL | G      | 2          | 71.0%            | 73.0%            |
| 125             | APR-AGL | H      | 2          | 64.0%            | 74.0%            |
| 250             | APR-AGL | I      | 2          | 66.0%            | 75.0%            |
| 500             | APR-AGL | J      | 2          | 60.0%            | 68.0%            |
| 1               | APR-AGL | B      | 3          | 134.0%           | 91.0%            |
| 2.92            | APR-AGL | C      | 3          | 89.0%            | 74.0%            |
| 8.55            | APR-AGL | D      | 3          | 82.0%            | 64.0%            |
| 25              | APR-AGL | E      | 3          | 76.0%            | 70.0%            |
| 46              | APR-AGL | F      | 3          | 75.0%            | 71.0%            |
| 95              | APR-AGL | G      | 3          | 73.0%            | 65.0%            |
| 125             | APR-AGL | H      | 3          | 66.0%            | 66.0%            |
| 250             | APR-AGL | I      | 3          | 64.0%            | 69.0%            |
| 500             | APR-AGL | J      | 3          | 58.0%            | 61.0%            |

**Supplementary Table 5 (graphics site 52):** % Recovery at individual concentration points (representative example)  
 (example for peptide APR-AGL at **site 52** for Studies I, II, and IIIa-c)

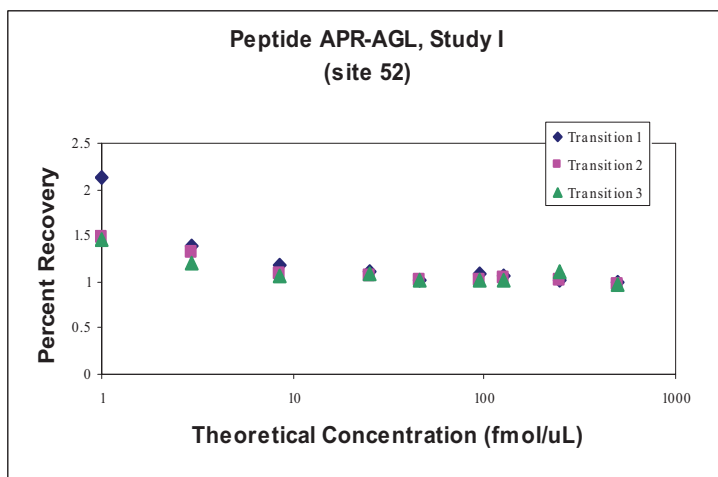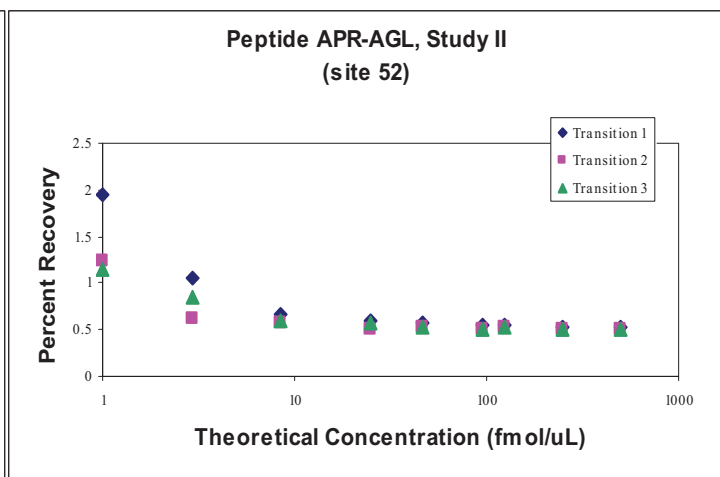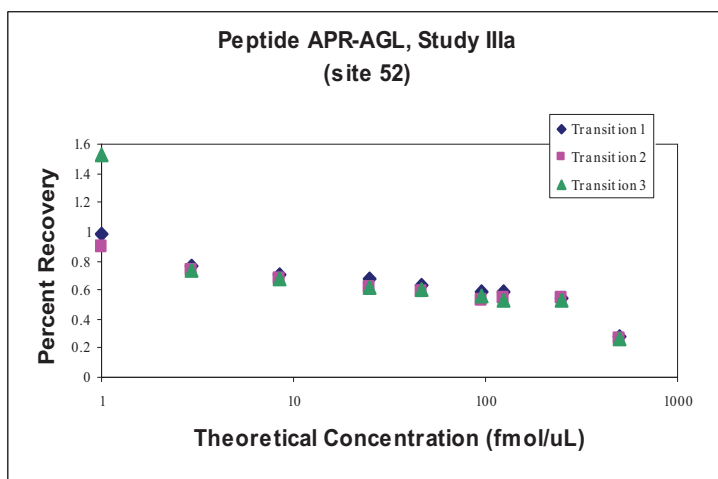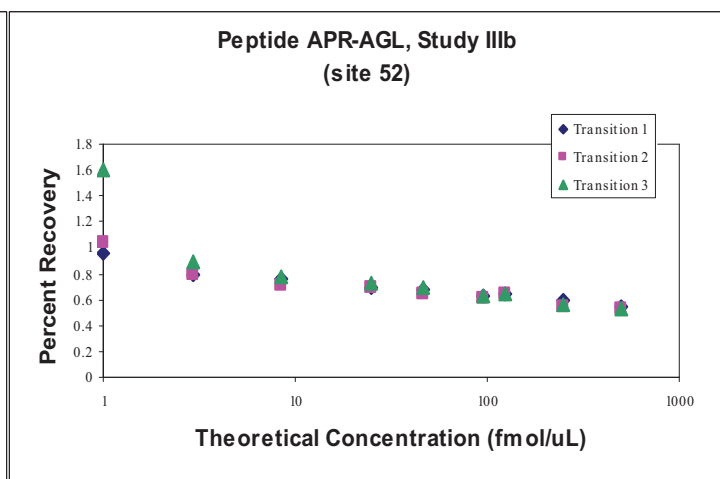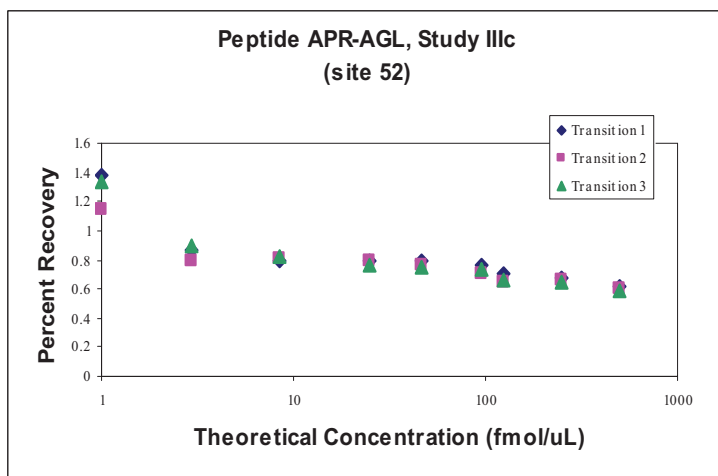

**Supplementary Table 5 (graphics site 56):** % Recovery at individual concentration points (representative example)  
 (example for peptide APR-AGL at **site 56** for Studies I, II, and IIIa-c)

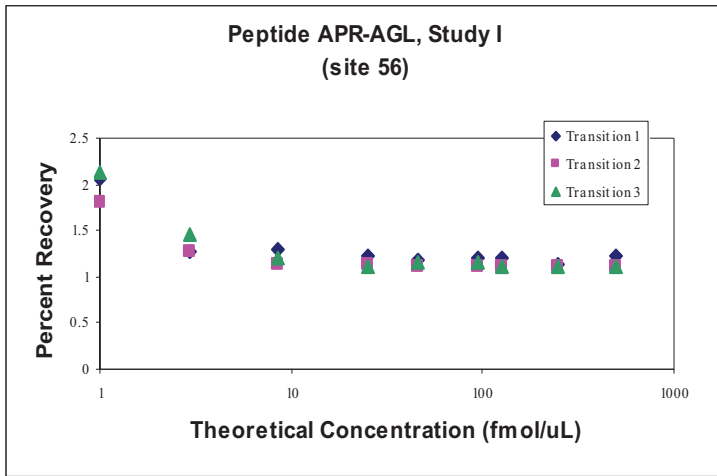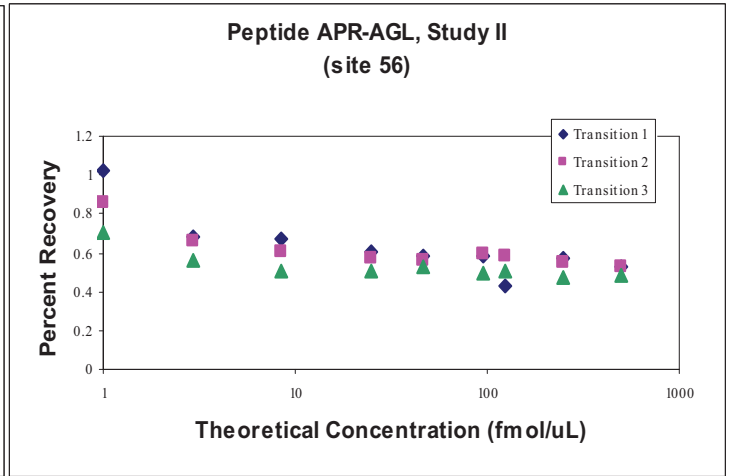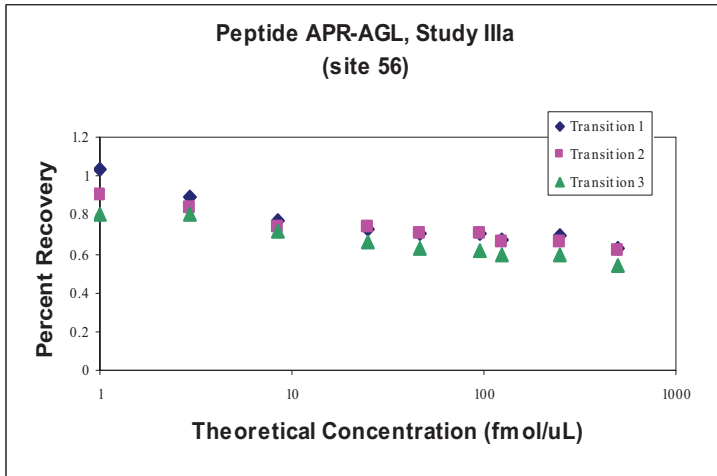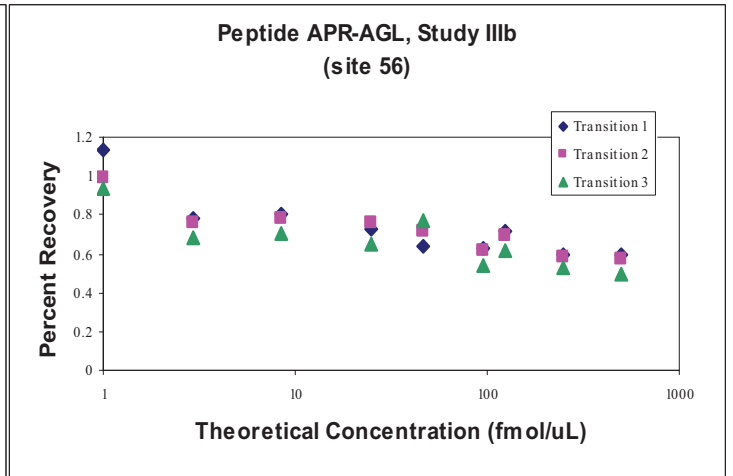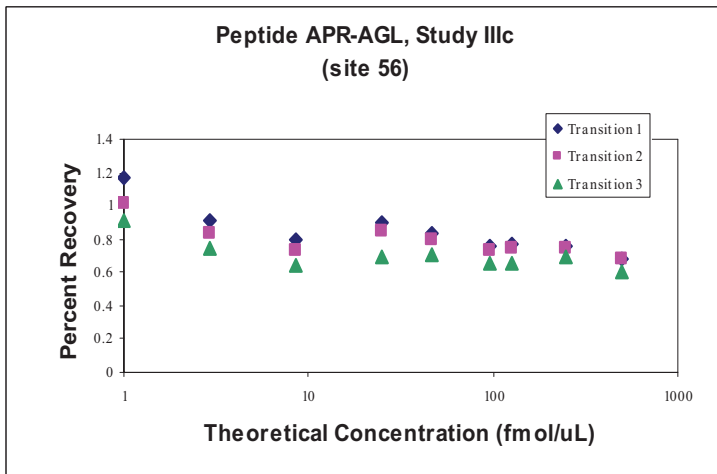



**Supplementary Table 6.A:** Concentrations of the isotopically-labeled ( $^{13}\text{C}/^{15}\text{N}$ ) internal standard peptides spiked into Study I samples

| Sample | Concentration, fmol/ $\mu\text{L}$ |        |        |        |        |        |        |        |        |        |        |
|--------|------------------------------------|--------|--------|--------|--------|--------|--------|--------|--------|--------|--------|
|        | bi0081                             | ni0101 | ni0102 | ni0104 | ni0105 | bi0067 | ni0107 | ni0108 | ni0109 | ni0110 | ni0111 |
| I-A    | 46.3                               | 44.5   | 43.9   | 45.2   | 45.7   | 46.0   | 45.5   | 45.7   | 46.8   | 44.7   | 45.2   |
| I-B    | 46.3                               | 44.5   | 43.9   | 45.2   | 45.7   | 46.0   | 45.5   | 45.7   | 46.8   | 44.7   | 45.2   |
| I-C    | 46.3                               | 44.5   | 43.9   | 45.2   | 45.7   | 46.0   | 45.5   | 45.7   | 46.8   | 44.7   | 45.2   |
| I-D    | 46.3                               | 44.5   | 43.9   | 45.2   | 45.7   | 46.0   | 45.5   | 45.7   | 46.8   | 44.7   | 45.2   |
| I-E    | 46.3                               | 44.5   | 43.9   | 45.2   | 45.7   | 46.0   | 45.5   | 45.7   | 46.8   | 44.7   | 45.2   |
| I-F    | 46.3                               | 44.5   | 43.9   | 45.2   | 45.7   | 46.0   | 45.5   | 45.7   | 46.8   | 44.7   | 45.2   |
| I-G    | 46.3                               | 44.5   | 43.9   | 45.2   | 45.7   | 46.0   | 45.5   | 45.7   | 46.8   | 44.7   | 45.2   |
| I-H    | 46.3                               | 44.5   | 43.9   | 45.2   | 45.7   | 46.0   | 45.5   | 45.7   | 46.8   | 44.7   | 45.2   |
| I-I    | 46.3                               | 44.5   | 43.9   | 45.2   | 45.7   | 46.0   | 45.5   | 45.7   | 46.8   | 44.7   | 45.2   |
| I-J    | 46.3                               | 44.5   | 43.9   | 45.2   | 45.7   | 46.0   | 45.5   | 45.7   | 46.8   | 44.7   | 45.2   |

\* A legend for the isotopically-labeled ( $^{13}\text{C}/^{15}\text{N}$ ) internal standard peptide name identifier can be found in the Supplementary Methods - SOP (therein embedded SOP Table A). Target concentrations for spike-in levels were 50 fmol/ $\mu\text{L}$ .

**Supplementary Table 6.B:** Concentrations of the unlabeled signature peptides spiked into Study I samples (NA = none added)

| Sample | Concentration, fmol/ $\mu\text{L}$ |        |        |        |        |        |        |        |        |        |        |
|--------|------------------------------------|--------|--------|--------|--------|--------|--------|--------|--------|--------|--------|
|        | bi0173                             | bi0167 | bi0171 | bi0169 | bi0170 | bi0161 | bi0037 | bi0166 | bi0231 | bi0202 | ni0001 |
| I-A    | NA                                 | NA     | NA     | NA     | NA     | NA     | NA     | NA     | NA     | NA     | NA     |
| I-B    | 0.9                                | 0.9    | 0.9    | 0.8    | 0.9    | 0.9    | 1.0    | 0.9    | 0.9    | 0.9    | 0.9    |
| I-C    | 2.6                                | 2.5    | 2.6    | 2.5    | 2.5    | 2.6    | 2.9    | 2.6    | 2.5    | 2.6    | 2.7    |
| I-D    | 7.7                                | 7.5    | 7.6    | 7.4    | 7.5    | 7.7    | 8.6    | 7.6    | 7.5    | 7.8    | 7.9    |
| I-E    | 22.4                               | 21.9   | 22.2   | 21.5   | 21.8   | 22.4   | 25.1   | 22.1   | 21.9   | 22.6   | 22.9   |
| I-F    | 41.3                               | 40.4   | 40.9   | 39.6   | 40.3   | 41.3   | 46.4   | 40.8   | 40.3   | 41.6   | 42.3   |
| I-G    | 74.4                               | 72.9   | 73.6   | 71.3   | 72.5   | 74.3   | 83.5   | 73.4   | 72.6   | 75.0   | 76.1   |
| I-H    | 136.8                              | 134.0  | 135.4  | 131.1  | 133.4  | 136.7  | 153.6  | 135.1  | 133.6  | 137.9  | 140.0  |
| I-I    | 251.7                              | 246.5  | 249.1  | 241.2  | 245.4  | 251.5  | 282.6  | 248.5  | 245.7  | 253.7  | 257.6  |
| I-J    | 463.0                              | 453.4  | 458.3  | 443.7  | 451.4  | 462.7  | 519.8  | 457.1  | 452.0  | 466.6  | 473.8  |

\* A legend for the unlabeled signature peptide name identifier can be found in the Supplementary Methods - SOP (therein embedded SOP Table A). Target concentrations for spike-in levels were the following: I -B (1.00 fmol/ $\mu\text{L}$ ), I -C (2.92 fmol/ $\mu\text{L}$ ), I -D (8.55 fmol/ $\mu\text{L}$ ), I -E (25 fmol/ $\mu\text{L}$ ), I -F (46 fmol/ $\mu\text{L}$ ), I -G (83 fmol/ $\mu\text{L}$ ), I -H (151 fmol/ $\mu\text{L}$ ), I -I (275 fmol/ $\mu\text{L}$ ), and I -J (500 fmol/ $\mu\text{L}$ ).

**Supplementary Table 6.C:** Concentrations of the isotopically-labeled ( $^{13}\text{C}/^{15}\text{N}$ ) internal standard peptides spiked into Study II samples

| Sample | Concentration, fmol/ $\mu\text{L}$ |        |        |        |        |        |        |        |        |        |        |
|--------|------------------------------------|--------|--------|--------|--------|--------|--------|--------|--------|--------|--------|
|        | bi0081                             | ni0101 | ni0102 | ni0104 | ni0105 | bi0067 | ni0107 | ni0108 | ni0109 | ni0110 | ni0111 |
| II-A   | 46.3                               | 44.5   | 43.9   | 45.2   | 45.7   | 46.0   | 45.5   | 45.7   | 46.8   | 44.7   | 45.2   |
| II-B   | 46.3                               | 44.5   | 43.9   | 45.2   | 45.7   | 46.0   | 45.5   | 45.7   | 46.8   | 44.7   | 45.2   |
| II-C   | 46.3                               | 44.5   | 43.9   | 45.2   | 45.7   | 46.0   | 45.5   | 45.7   | 46.8   | 44.7   | 45.2   |
| II-D   | 46.3                               | 44.5   | 43.9   | 45.2   | 45.7   | 46.0   | 45.5   | 45.7   | 46.8   | 44.7   | 45.2   |
| II-E   | 46.3                               | 44.5   | 43.9   | 45.2   | 45.7   | 46.0   | 45.5   | 45.7   | 46.8   | 44.7   | 45.2   |
| II-F   | 46.3                               | 44.5   | 43.9   | 45.2   | 45.7   | 46.0   | 45.5   | 45.7   | 46.8   | 44.7   | 45.2   |
| II-G   | 46.3                               | 44.5   | 43.9   | 45.2   | 45.7   | 46.0   | 45.5   | 45.7   | 46.8   | 44.7   | 45.2   |
| II-H   | 46.3                               | 44.5   | 43.9   | 45.2   | 45.7   | 46.0   | 45.5   | 45.7   | 46.8   | 44.7   | 45.2   |
| II-I   | 46.3                               | 44.5   | 43.9   | 45.2   | 45.7   | 46.0   | 45.5   | 45.7   | 46.8   | 44.7   | 45.2   |
| II-J   | 46.3                               | 44.5   | 43.9   | 45.2   | 45.7   | 46.0   | 45.5   | 45.7   | 46.8   | 44.7   | 45.2   |

\* A legend for the isotopically-labeled ( $^{13}\text{C}/^{15}\text{N}$ ) internal standard peptide name identifier can be found in the Supplementary Methods - SOP (therein embedded SOP Table A). Target concentrations for spike-in levels were 50 fmol/ $\mu\text{L}$ .

**Supplementary Table 6.D:** Concentrations of the digested proteins spiked into Study II samples (NA = none added)

| Sample | Concentration, fmol/ $\mu\text{L}$ |       |       |       |       |       |       |
|--------|------------------------------------|-------|-------|-------|-------|-------|-------|
|        | APR                                | LEP   | MYO   | MBP   | PSA   | HRP   | CRP   |
| II-A   | NA                                 | NA    | NA    | NA    | NA    | NA    | NA    |
| II-B   | 1.0                                | 1.0   | 1.0   | 1.0   | 1.0   | 1.0   | 1.0   |
| II-C   | 2.8                                | 2.8   | 2.8   | 2.8   | 2.8   | 2.8   | 2.9   |
| II-D   | 8.4                                | 8.4   | 8.2   | 8.4   | 8.4   | 8.4   | 8.5   |
| II-E   | 24.4                               | 24.6  | 24.0  | 24.5  | 24.4  | 24.4  | 24.7  |
| II-F   | 44.8                               | 45.2  | 44.1  | 45.0  | 44.9  | 44.9  | 45.4  |
| II-G   | 81.1                               | 81.7  | 79.8  | 81.4  | 81.2  | 81.2  | 82.1  |
| II-H   | 147.8                              | 149.0 | 145.5 | 148.4 | 148.0 | 148.1 | 149.6 |
| II-I   | 268.6                              | 270.8 | 264.5 | 269.8 | 269.0 | 269.2 | 272.0 |
| II-J   | 487.3                              | 491.2 | 479.8 | 489.4 | 488.0 | 488.3 | 493.5 |

\* Protein name abbreviations: APR (aprotinin), LEP (leptin), MYO (myoglobin), MBP (myelin basic protein), PSA (prostate specific antigen), HRP (horseradish peroxidase), and CRP (C-reactive protein).

Target concentrations for spike-in levels were the following: II -B (1.00 fmol/ $\mu\text{L}$ ), II -C (2.92 fmol/ $\mu\text{L}$ ), II -D (8.55 fmol/ $\mu\text{L}$ ), II -E (25 fmol/ $\mu\text{L}$ ), II -F (46 fmol/ $\mu\text{L}$ ), II -G (83 fmol/ $\mu\text{L}$ ), II -H (151 fmol/ $\mu\text{L}$ ), II -I (275 fmol/ $\mu\text{L}$ ), and II -J (500 fmol/ $\mu\text{L}$ ).

**Supplementary Table 6.E:** Concentrations of the isotopically-labeled ( $^{13}\text{C}/^{15}\text{N}$ ) internal standard peptides in the IS peptide mixture distributed with Study III samples

|                                                      | bi0081 | ni0101 | ni0102 | ni0104 | ni0105 | bi0067 | ni0107 | ni0108 | ni0109 | ni0110 | ni0111 |
|------------------------------------------------------|--------|--------|--------|--------|--------|--------|--------|--------|--------|--------|--------|
| <b>IS Peptide Mix, fmol/<math>\mu\text{L}</math></b> | 476.9  | 458.1  | 460.2  | 470.7  | 457.2  | 464.2  | 469.6  | 469.5  | 506.8  | 477.8  | 447.3  |

\* A legend for the isotopically-labeled ( $^{13}\text{C}/^{15}\text{N}$ ) internal standard peptide name identifier can be found in the Supplementary Methods - SOP (therein embedded SOP Table A). Target concentrations for spike-in levels were 500 fmol/ $\mu\text{L}$ .

**Supplementary Table 6.F:** Concentrations of the proteins spiked into Study III samples (NA = none added)

| <b>Sample</b> | <b>Concentration, fmol/<math>\mu\text{L}</math></b> |            |            |            |            |            |            |
|---------------|-----------------------------------------------------|------------|------------|------------|------------|------------|------------|
|               | <b>APR</b>                                          | <b>LEP</b> | <b>MYO</b> | <b>MBP</b> | <b>PSA</b> | <b>HRP</b> | <b>CRP</b> |
| III-A         | NA                                                  | NA         | NA         | NA         | NA         | NA         | NA         |
| III-B         | 63                                                  | 62         | 62         | 63         | 62         | 62         | 63         |
| III-C         | 183                                                 | 180        | 181        | 182        | 179        | 180        | 183        |
| III-D         | 534                                                 | 525        | 528        | 530        | 521        | 526        | 533        |
| III-E         | 1559                                                | 1532       | 1541       | 1548       | 1520       | 1535       | 1555       |
| III-F         | 2879                                                | 2829       | 2845       | 2859       | 2807       | 2835       | 2872       |
| III-G         | 5135                                                | 5046       | 5074       | 5099       | 5006       | 5056       | 5122       |
| III-H         | 9271                                                | 9111       | 9163       | 9208       | 9039       | 9129       | 9249       |
| III-I         | 16817                                               | 16525      | 16619      | 16701      | 16394      | 16559      | 16777      |
| III-J         | 30461                                               | 29934      | 30104      | 30251      | 29696      | 29994      | 30389      |

\* Protein name abbreviations: APR (aprotinin), LEP (leptin), MYO (myoglobin), MBP (myelin basic protein), PSA (prostate specific antigen), HRP (horseradish peroxidase), and CRP (C-reactive protein).

Target concentrations for spike-in levels were the following: II -B (60 fmol/ $\mu\text{L}$ ), II -C (175 fmol/ $\mu\text{L}$ ), II -D (513 fmol/ $\mu\text{L}$ ), II -E (1,500 fmol/ $\mu\text{L}$ ), II -F (2,760 fmol/ $\mu\text{L}$ ), II -G (4,980 fmol/ $\mu\text{L}$ ), II -H (9,060 fmol/ $\mu\text{L}$ ), II -I (16,500 fmol/ $\mu\text{L}$ ), and II -J (30,000 fmol/ $\mu\text{L}$ ).

**Footnote for all Supplementary Tables 6 A-F:**

For spike in experiments in Studies I-III, gravimetric determination of solution amounts were performed as gravimetric determinations have proven to be much more accurate and precise than volumetric determinations, particularly when total volumes are low. Gravimetric sample preparations were performed using one of two balances (a Mettler Toledo model XP205 and a Mettler Toledo model AX26 balance; 6-place balances).

For instance, for the preparation of the Study I samples, the volume of the heavy peptide mix weighed out was about 1 mL while the volume of the digested, diluted plasma was about 20 mL. In determining both volumes by gravimetry, the solutions were equilibrated to the balance room temperature for a few hours; the weights of aliquots are then converted to volumes using the measured temperature and assumed density. The density of the above solutions was assumed to be the same as that of water (as these solutions were not very concentrated). For Study III sample preparation, we determined the density of the undigested, concentrated plasma, which differs from that of water.

**Supplementary Appendix:**

Dilution curves represented as **Log-Log Plots**

Dilution curves of calculated concentrations (y-axis, log scale) of the ten signature peptides and the theoretical/spiked-in concentration (x-axis, log scale) into solution (buffer or plasma matrix). These dilution plots are represented on a log / log scale for all five Studies I, II, III a-c, and all ten peptides with three transitions each from all eight participating sites.

Each of the eight sites were assigned random numerical codes (19, 52, 54, 56, 65, 73, 86, 95) for anonymization purposes. The dilution curves are organized by signature peptide, then by experiment (Studies I, II, III a,b,c) and all eight sites are displayed on each page. Study number and anonymization code for each site are displayed right above the individual regression plot (i.e., “I site 19” etc.), as well as the derived protein 3-letter code, the first three amino acids of the peptide sequence (i.e., APR-AGL; for further details see SOP – Supplementary Methods online). The three letter protein codes stand for APR (aprotinin), CRP (C-reactive protein), HRP (horseradish peroxidase), LEP (leptin), MBP (myelin basic protein), MYO (myoglobin), and PSA (prostate specific antigen). All theoretical/spiked-in concentrations are gravimetrically corrected (see Supplementary Tables 6 A-F).

A diagonal is displayed at  $y=x$  for all plots, no regression lines are fitted. All data are plotted on a logarithmic scale for the x and y axes.

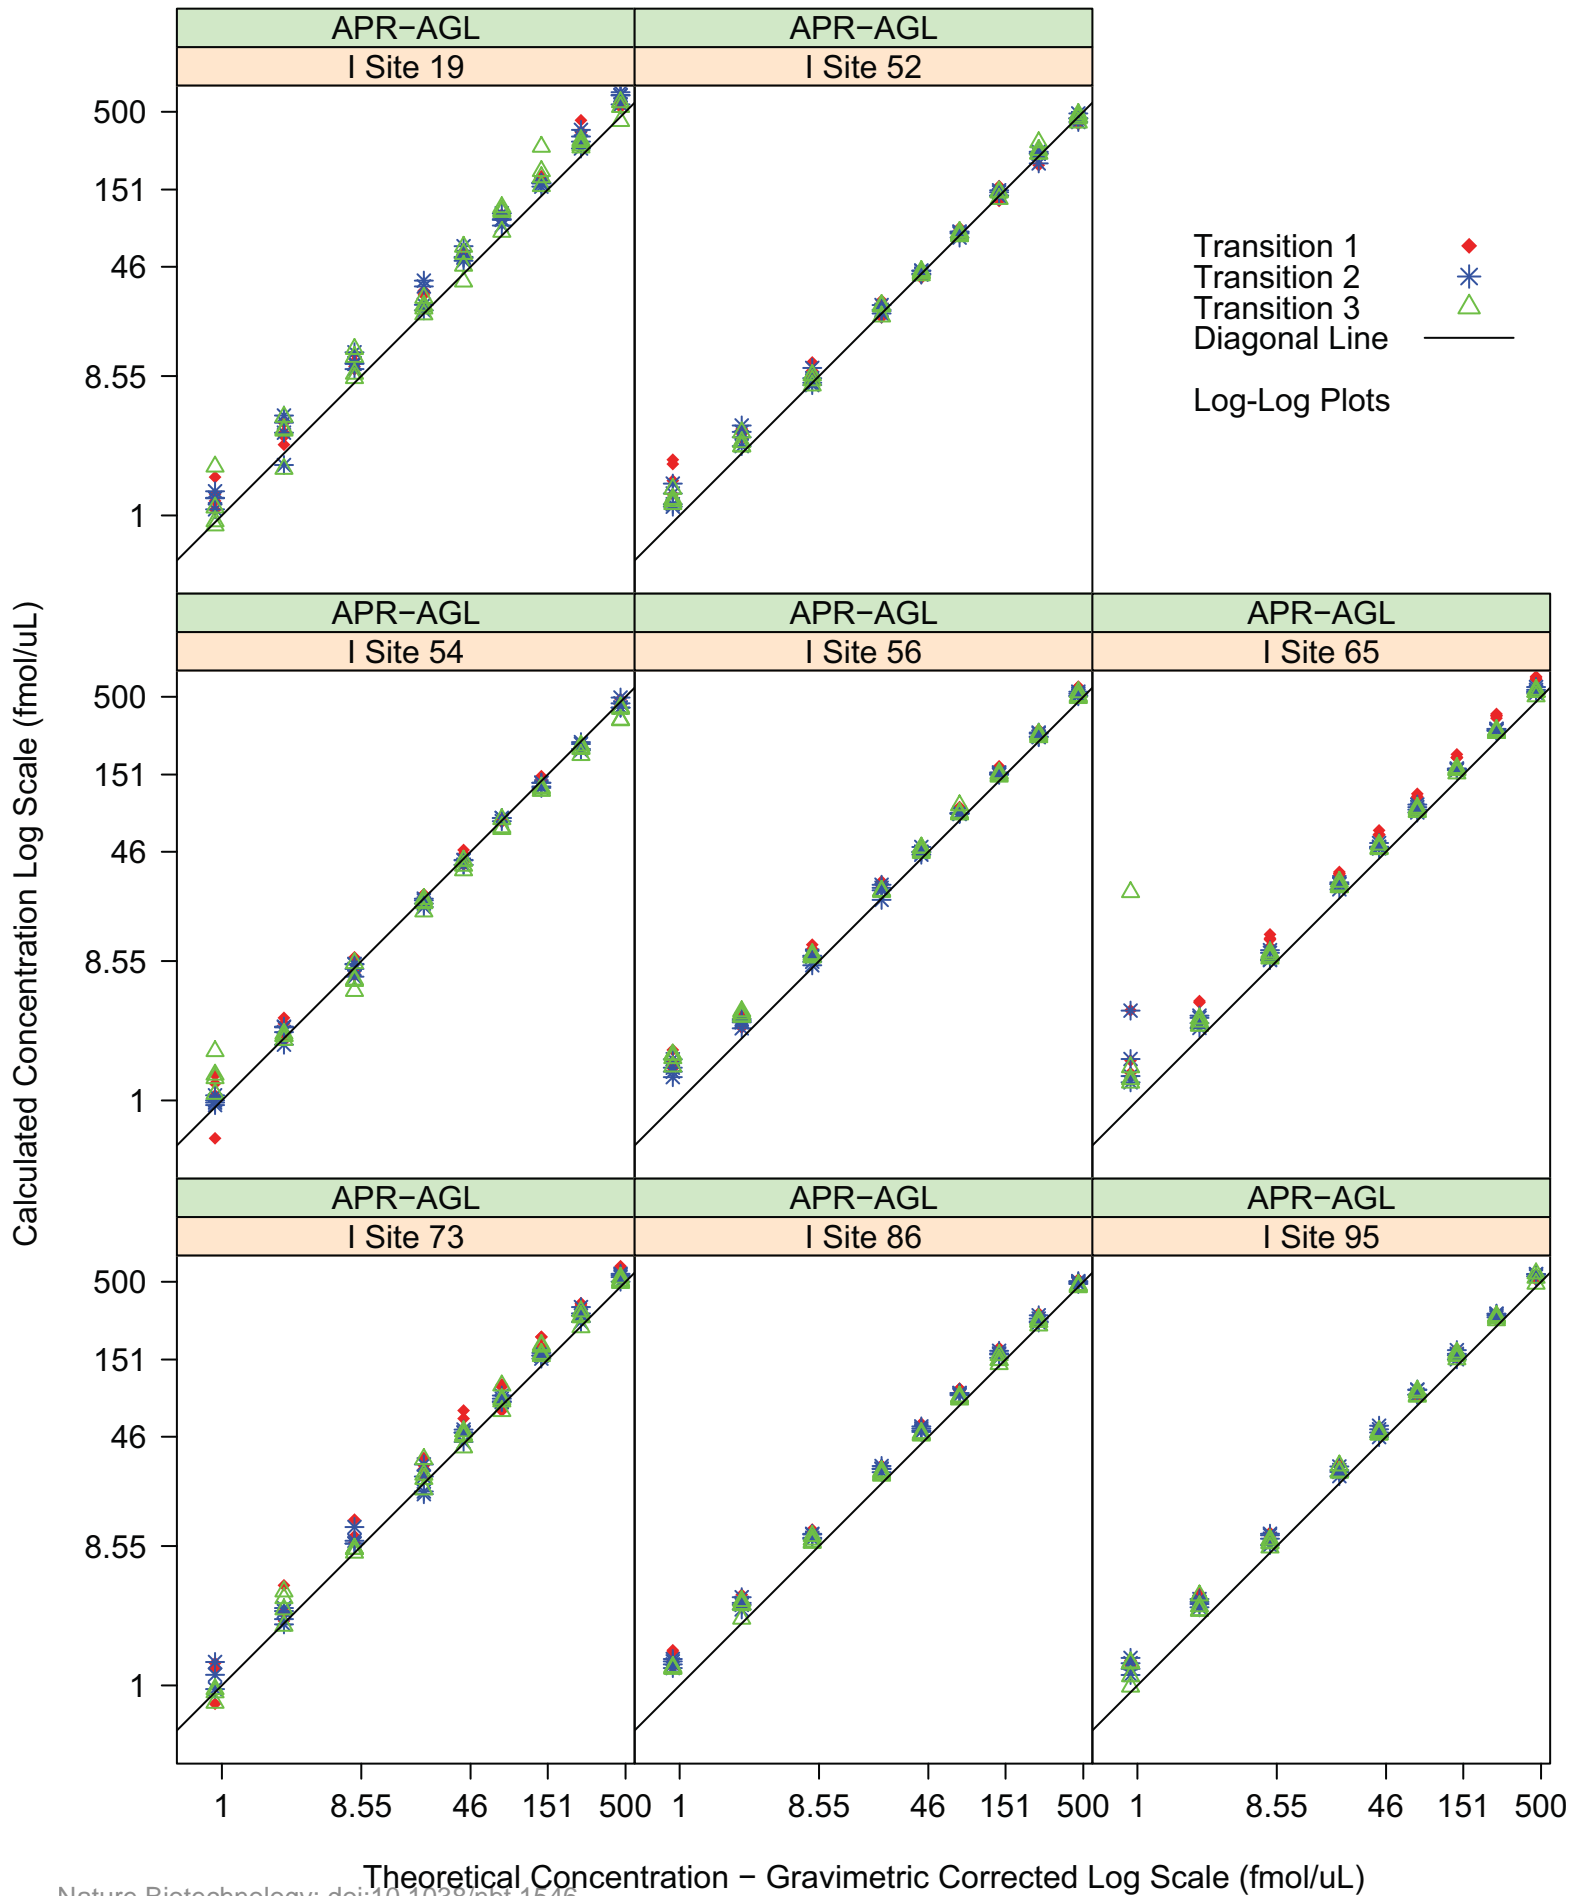

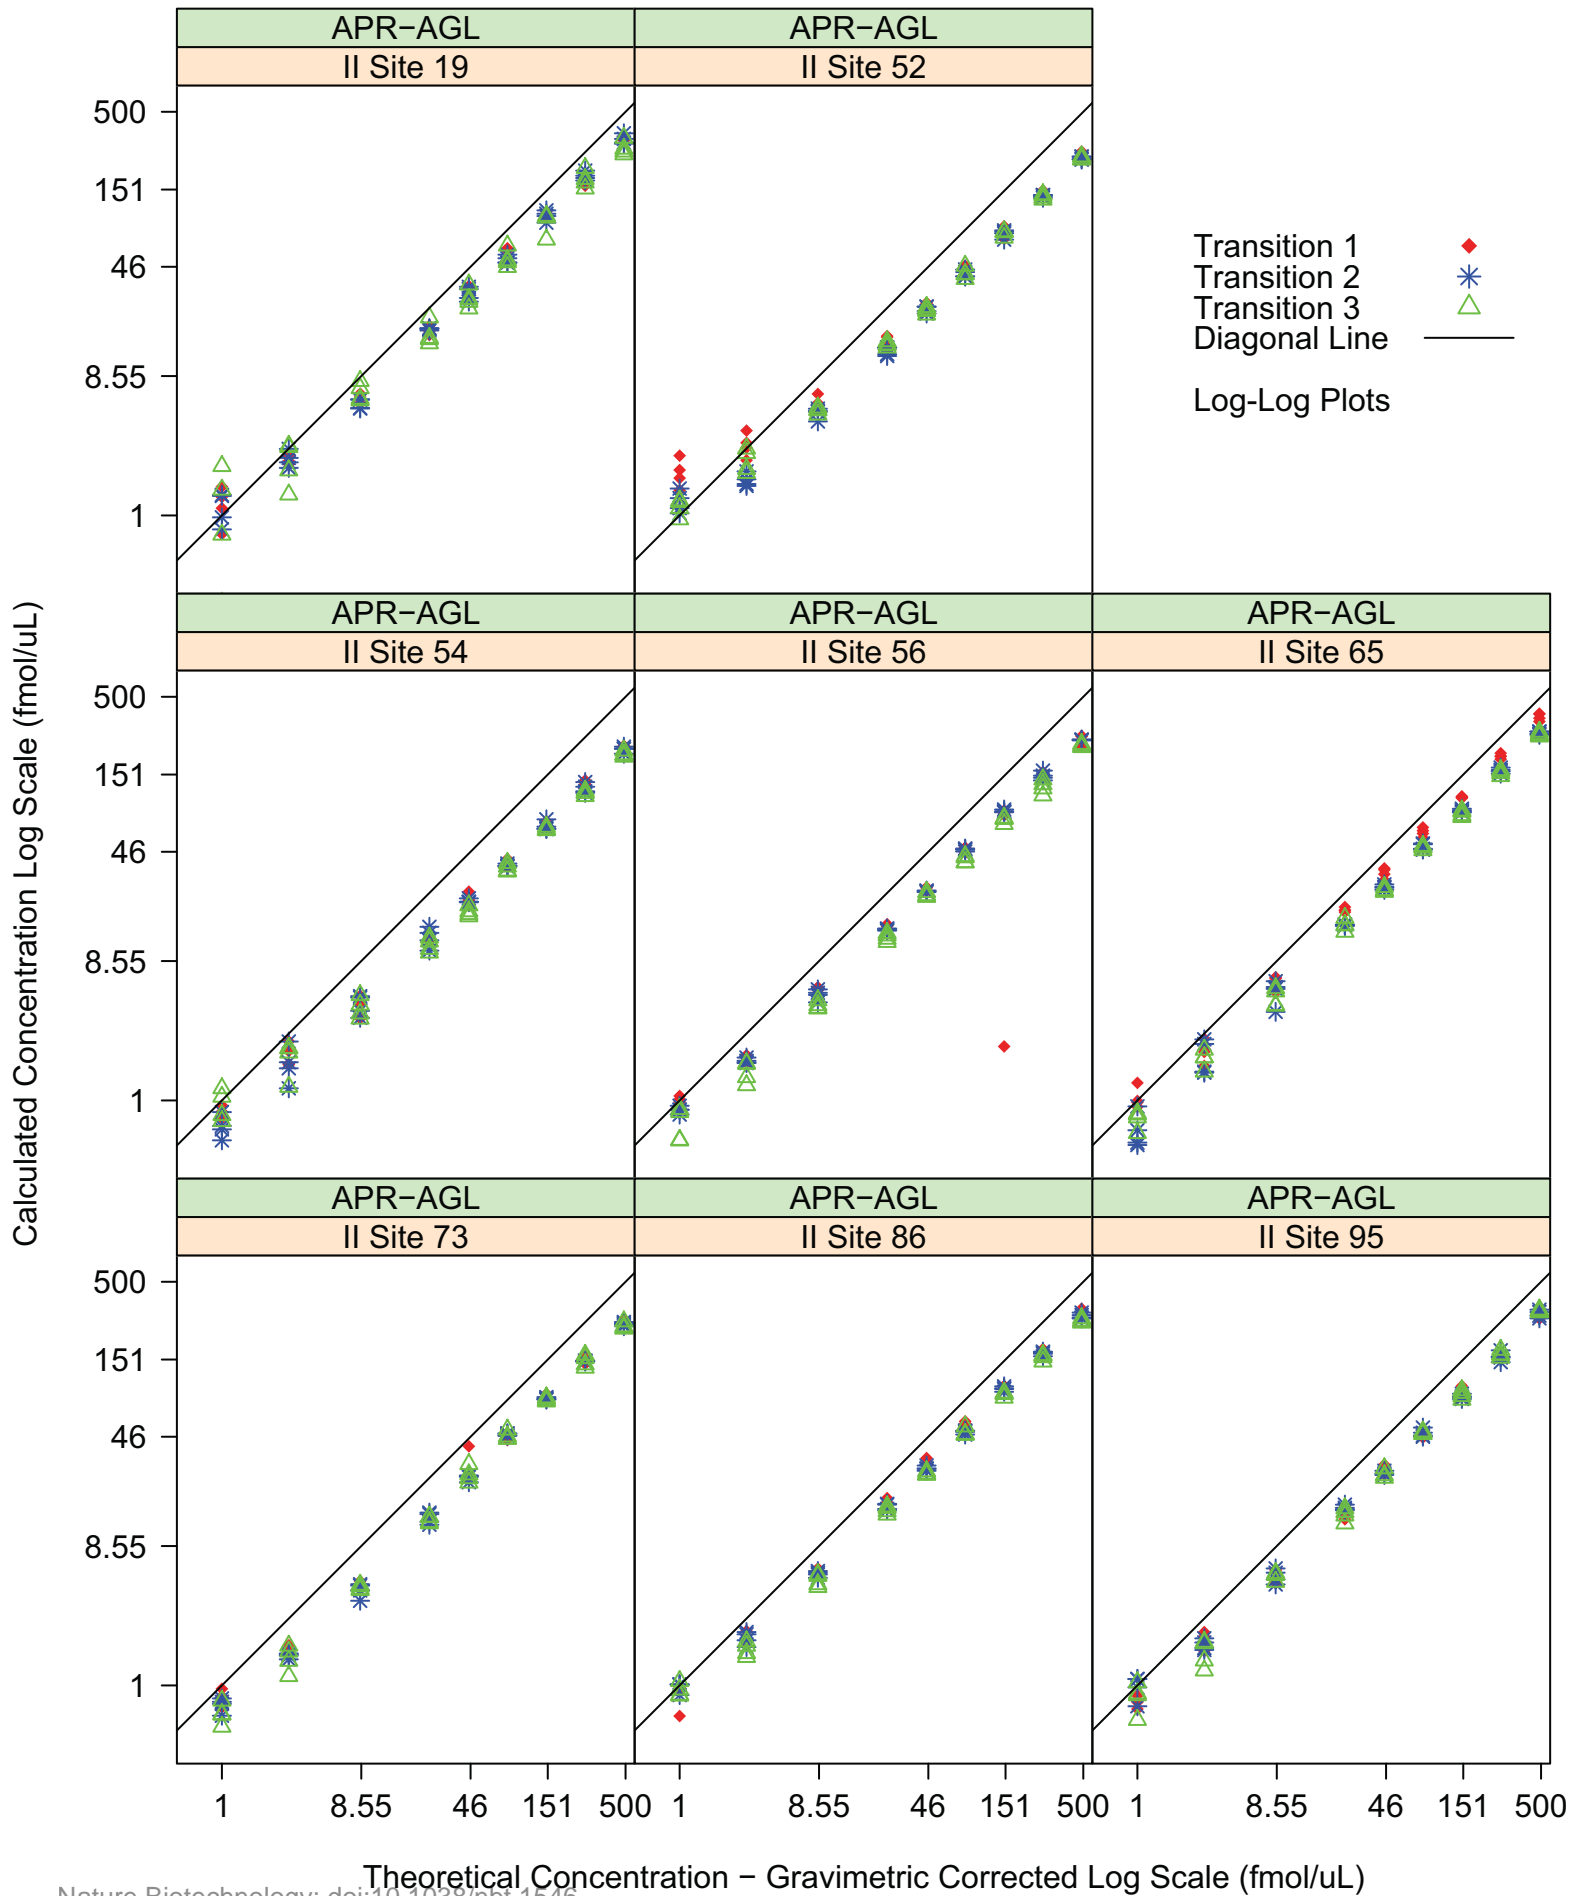

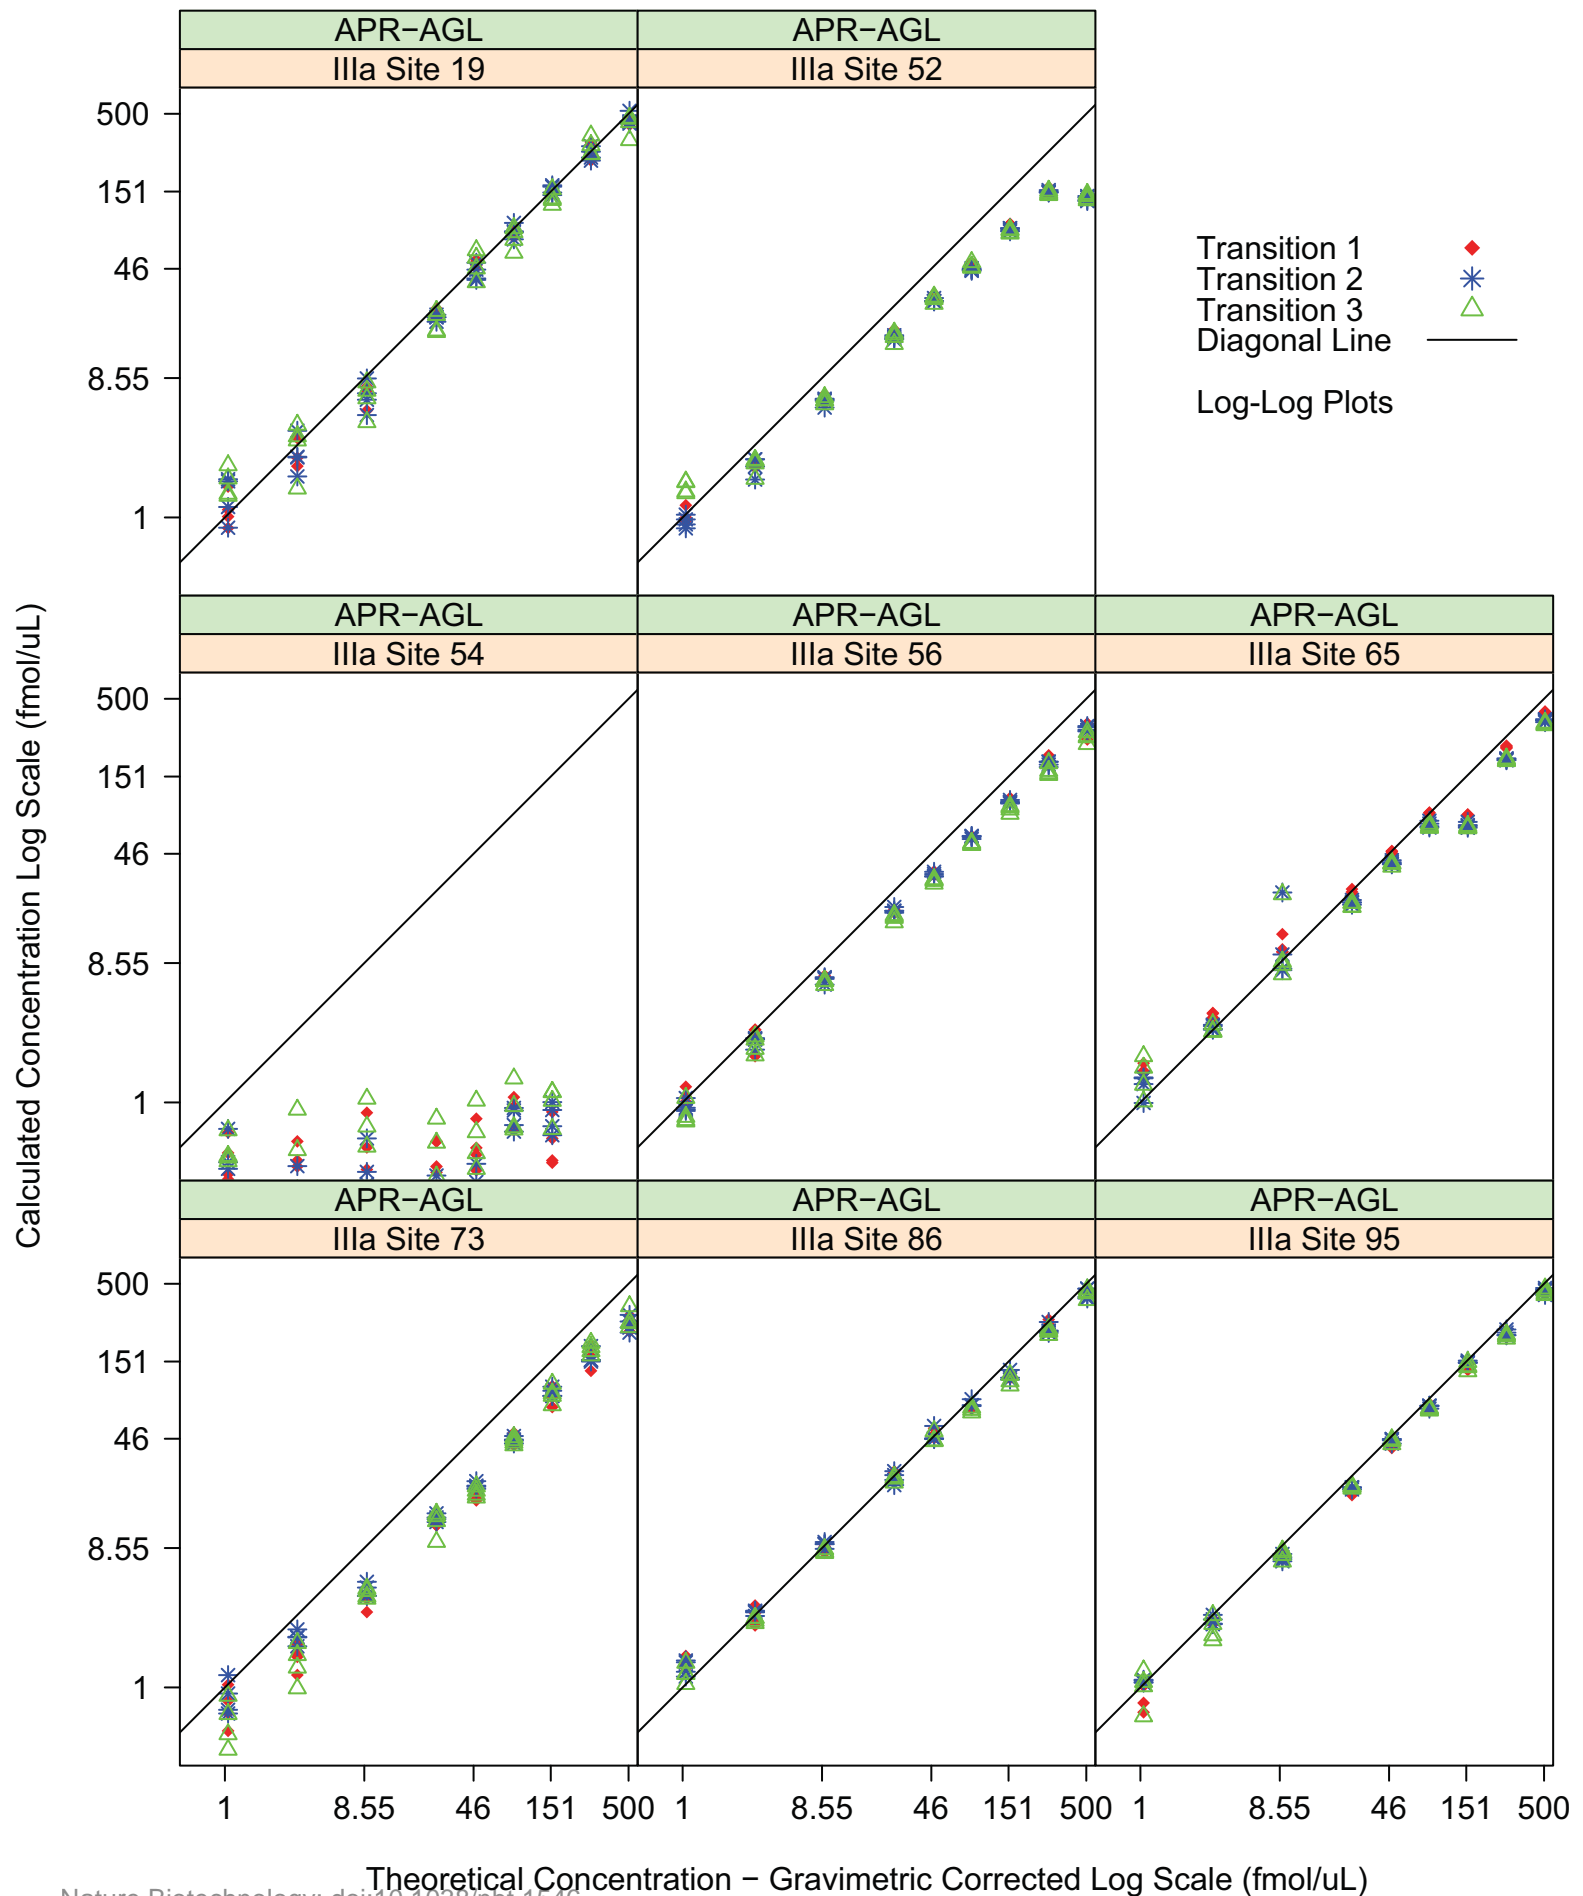



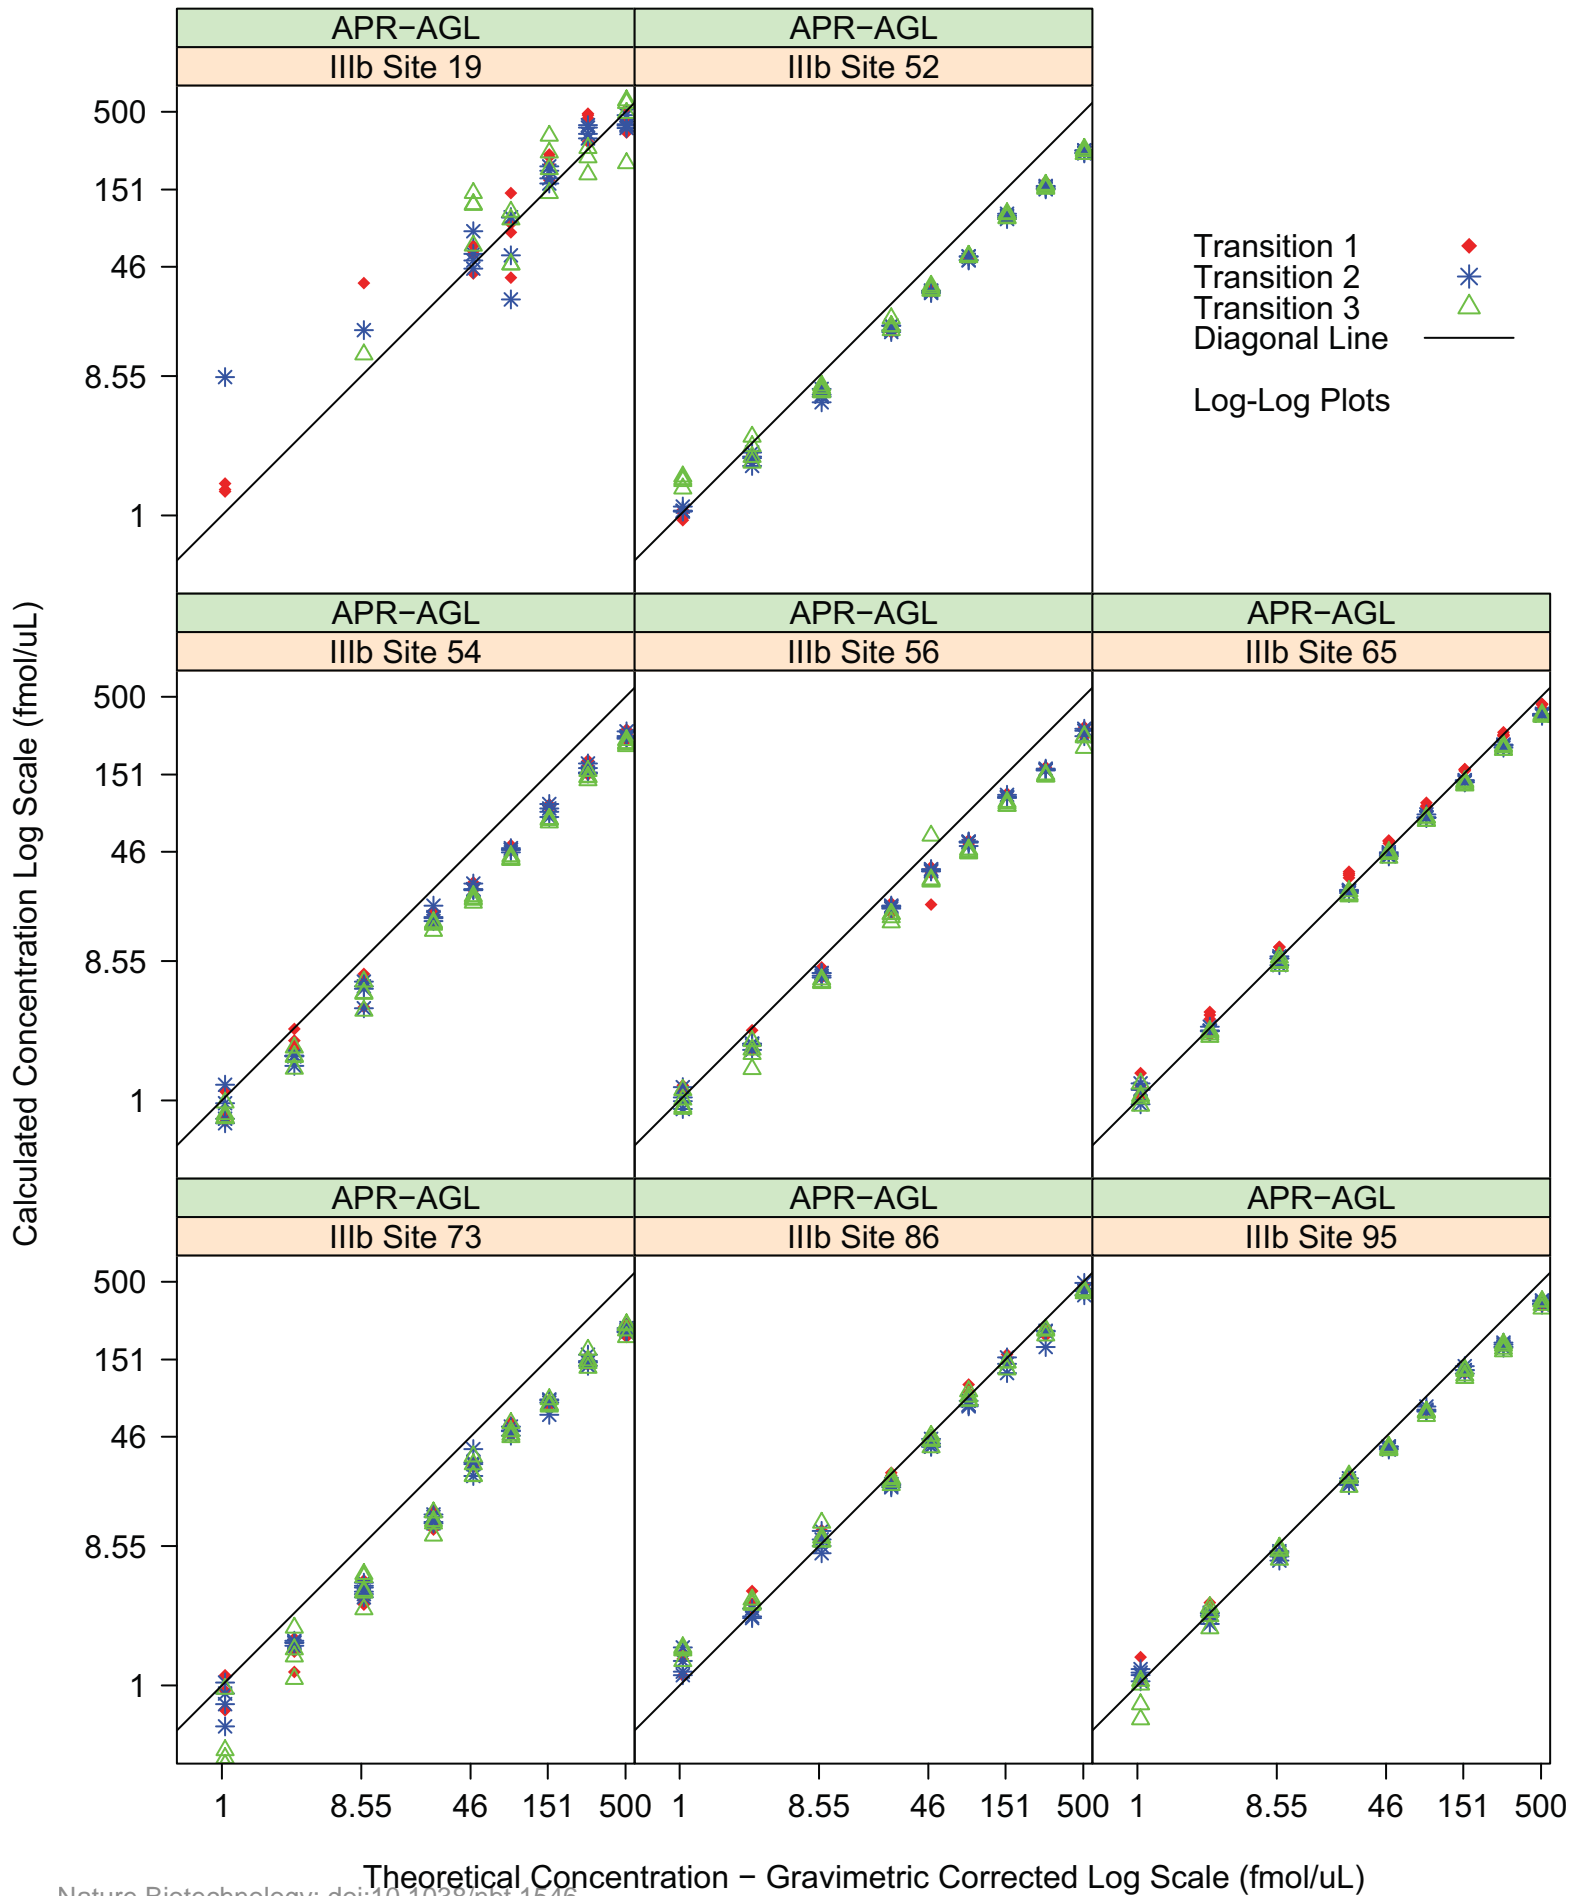

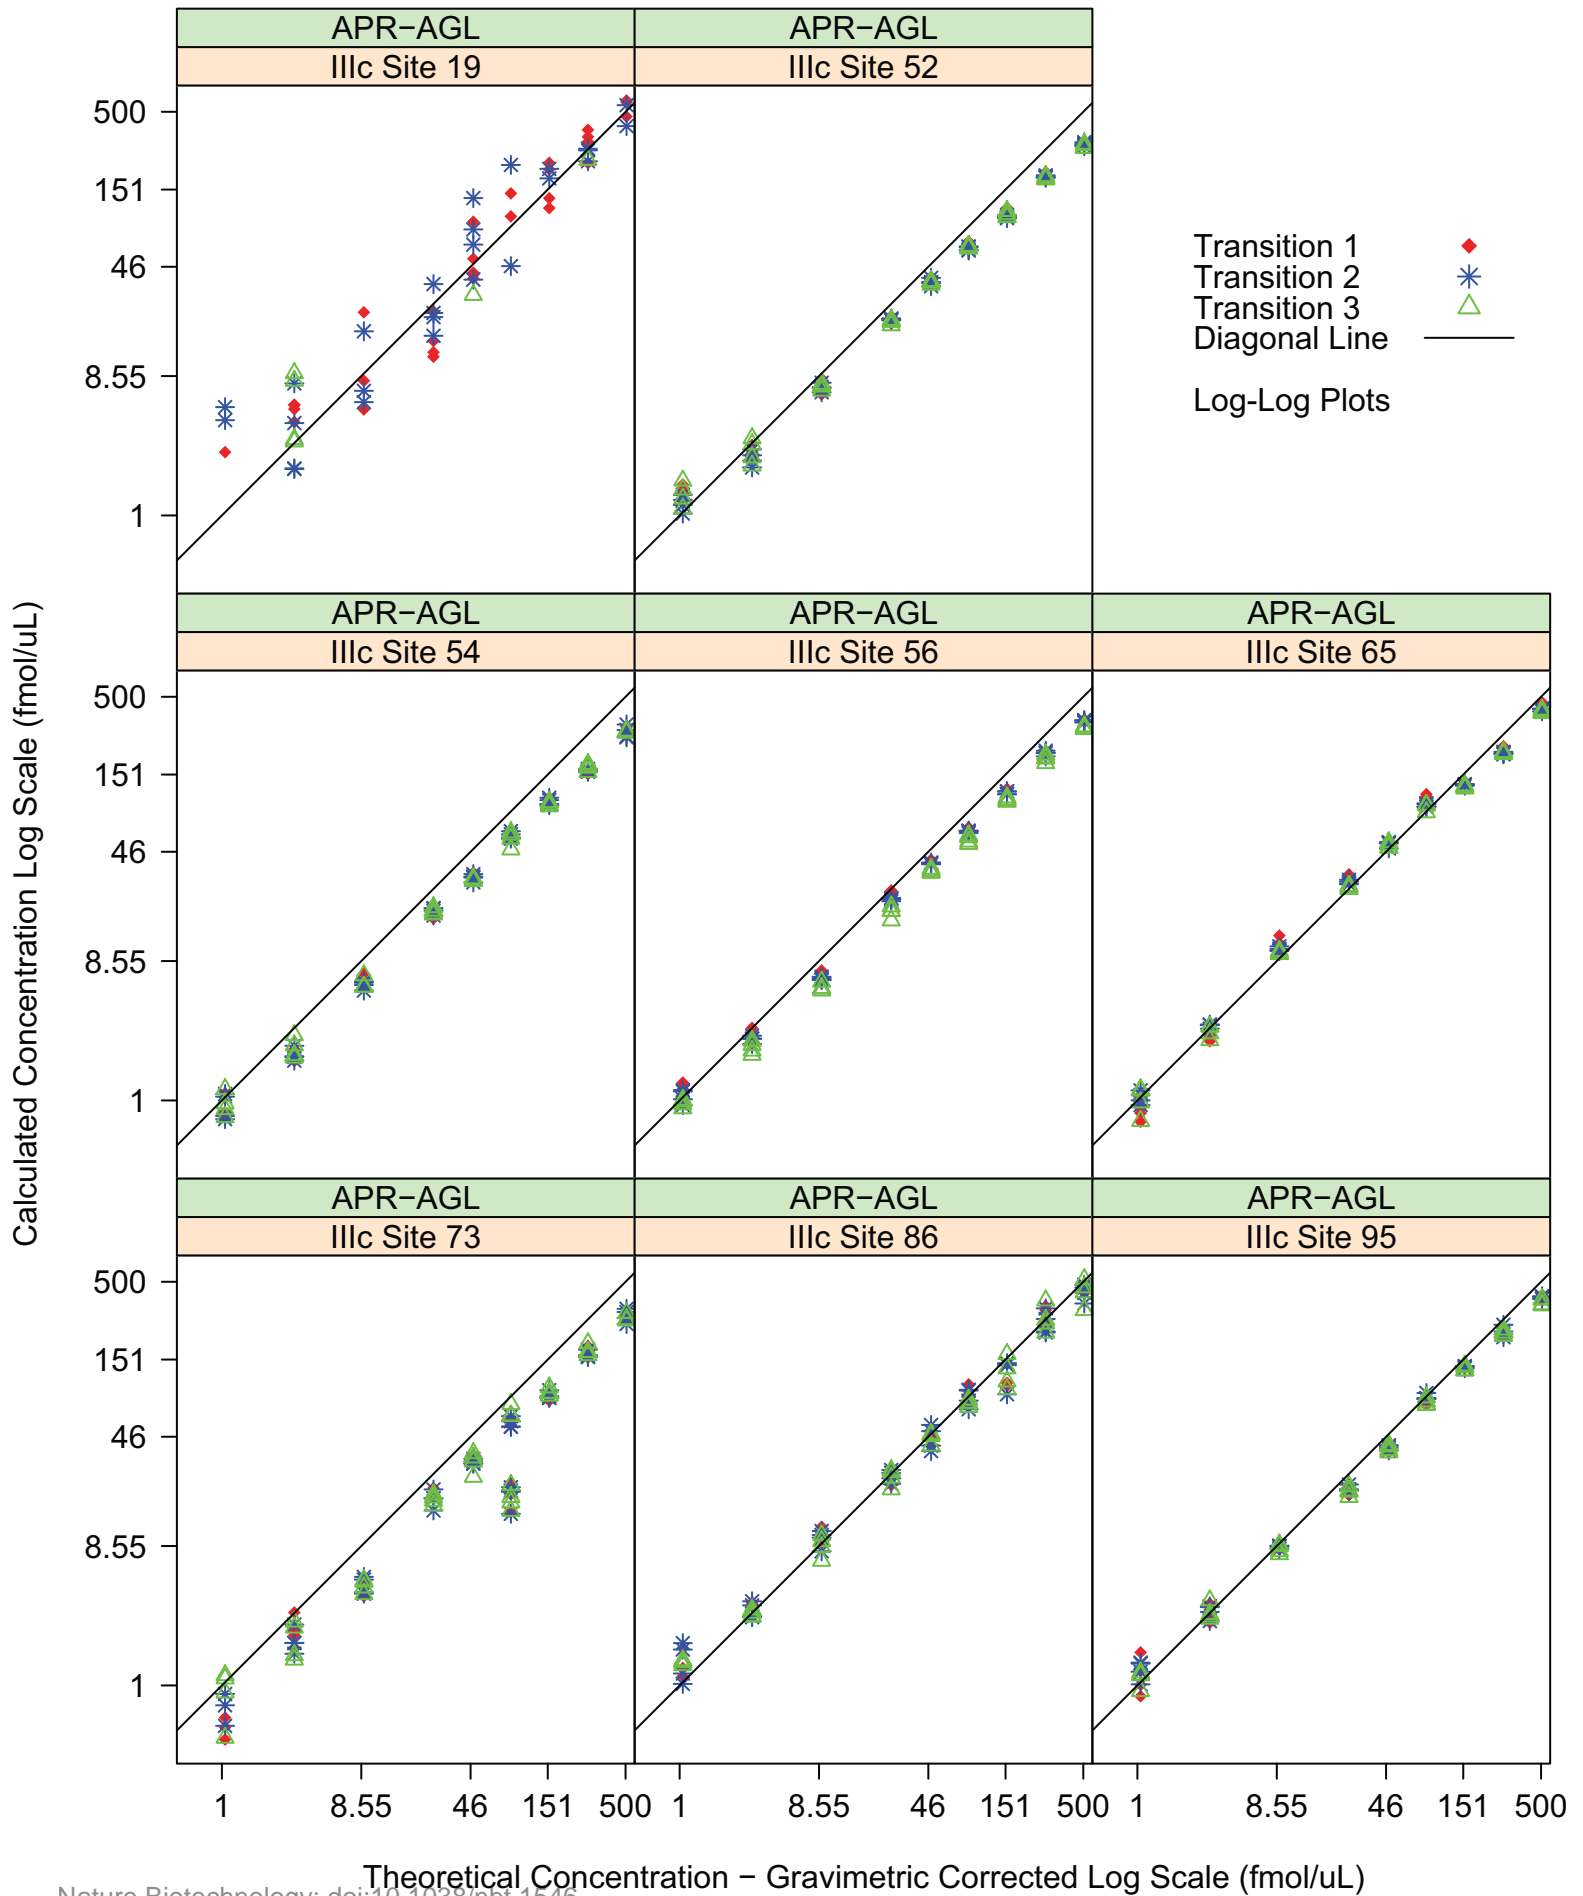

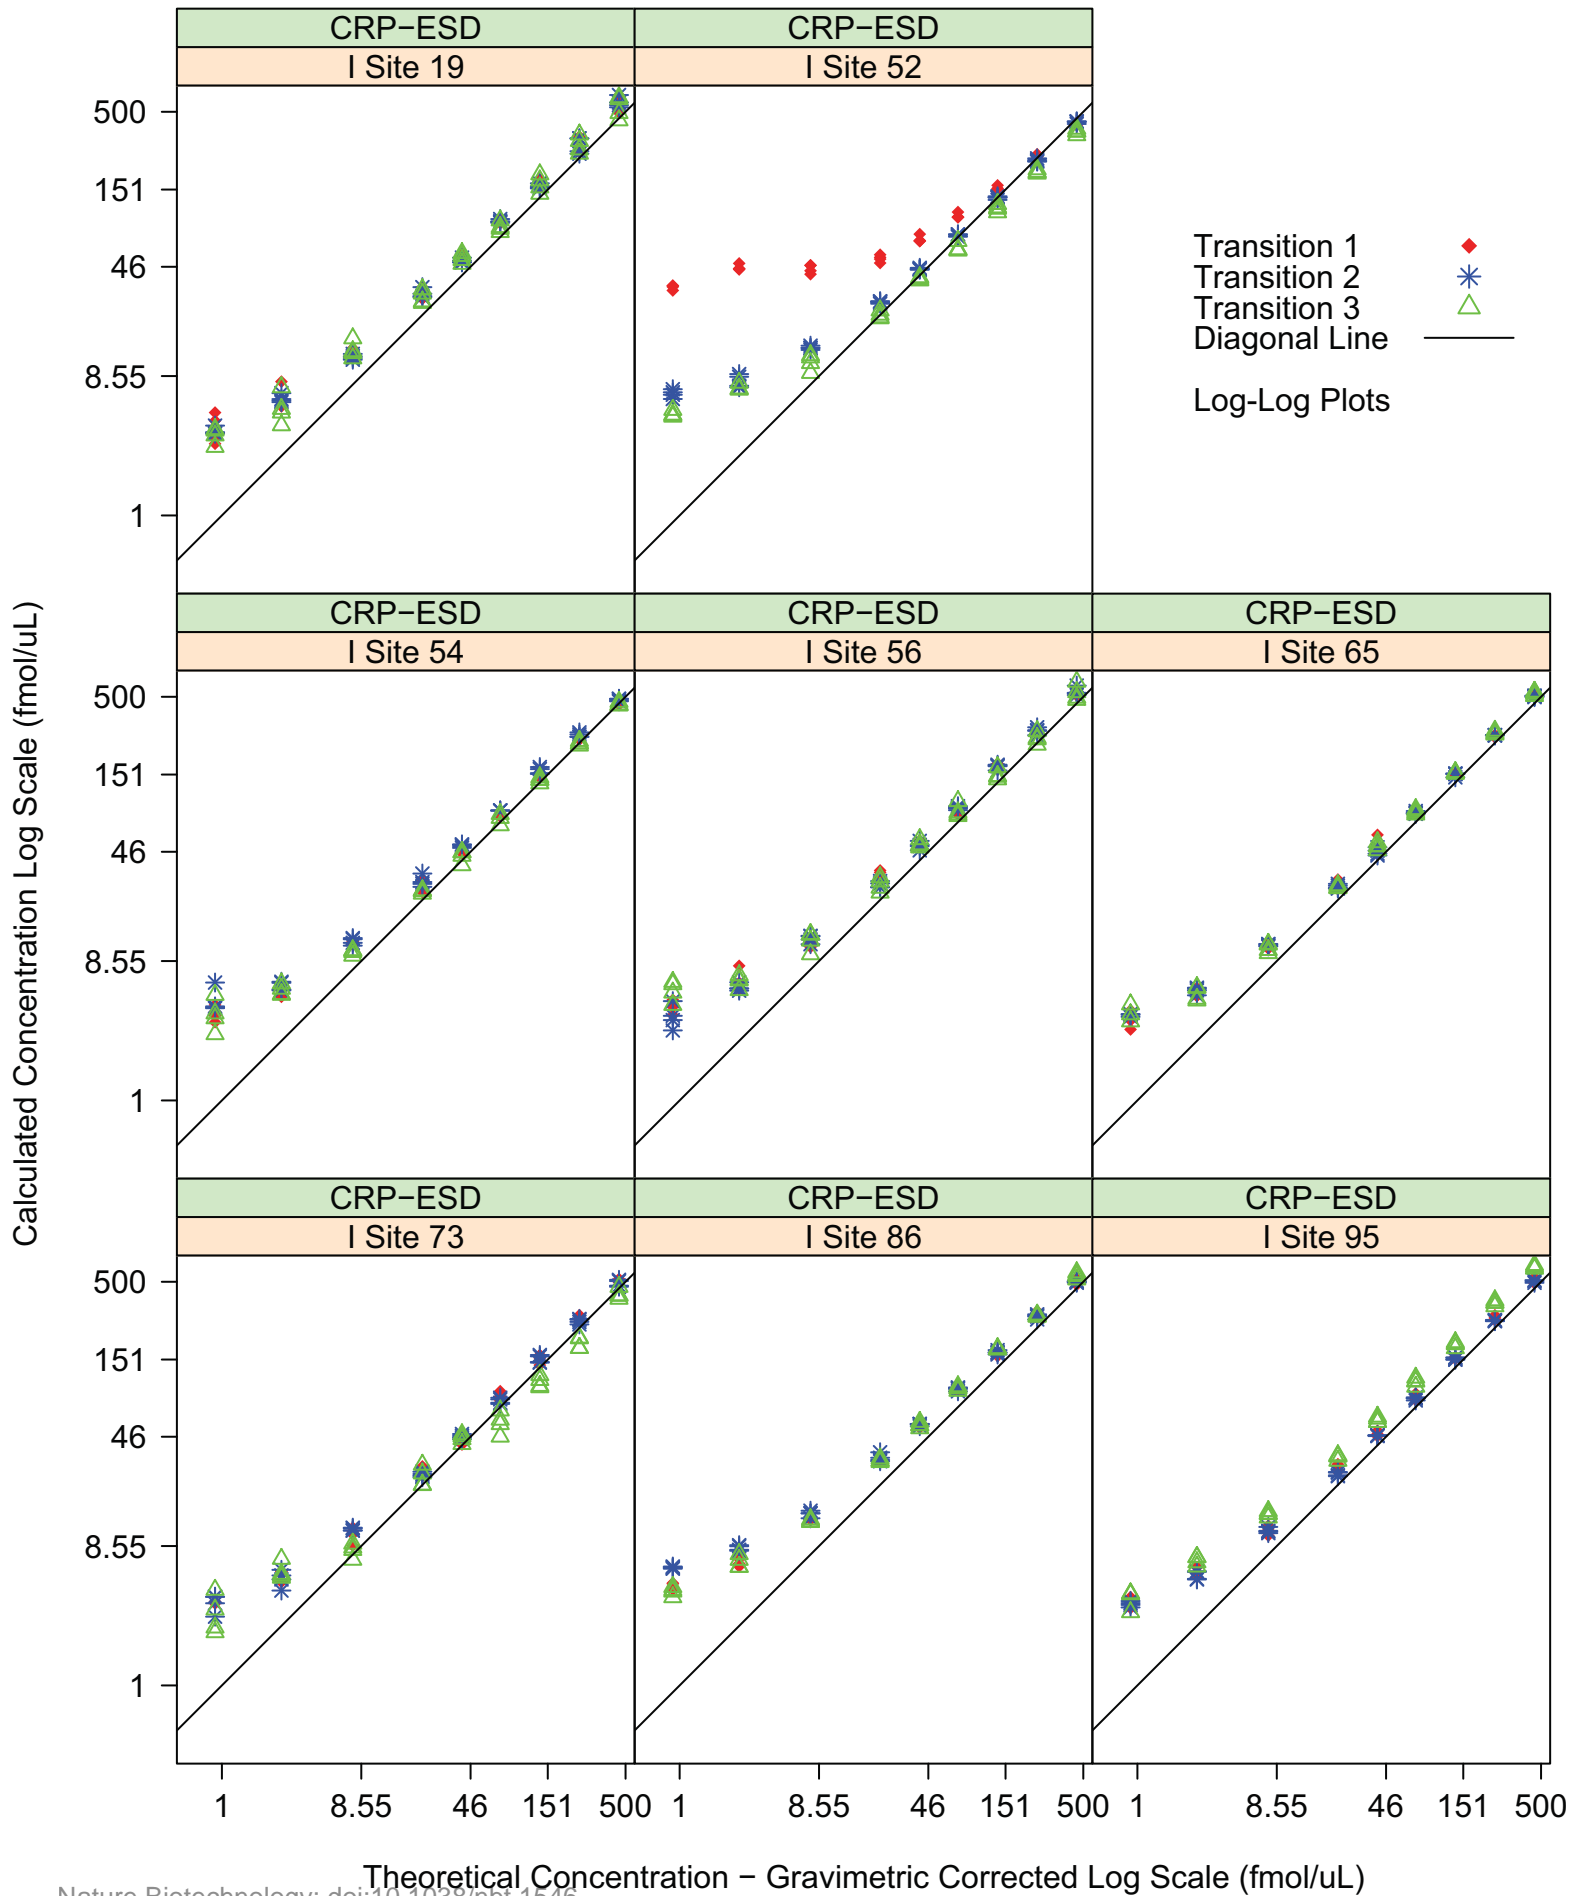

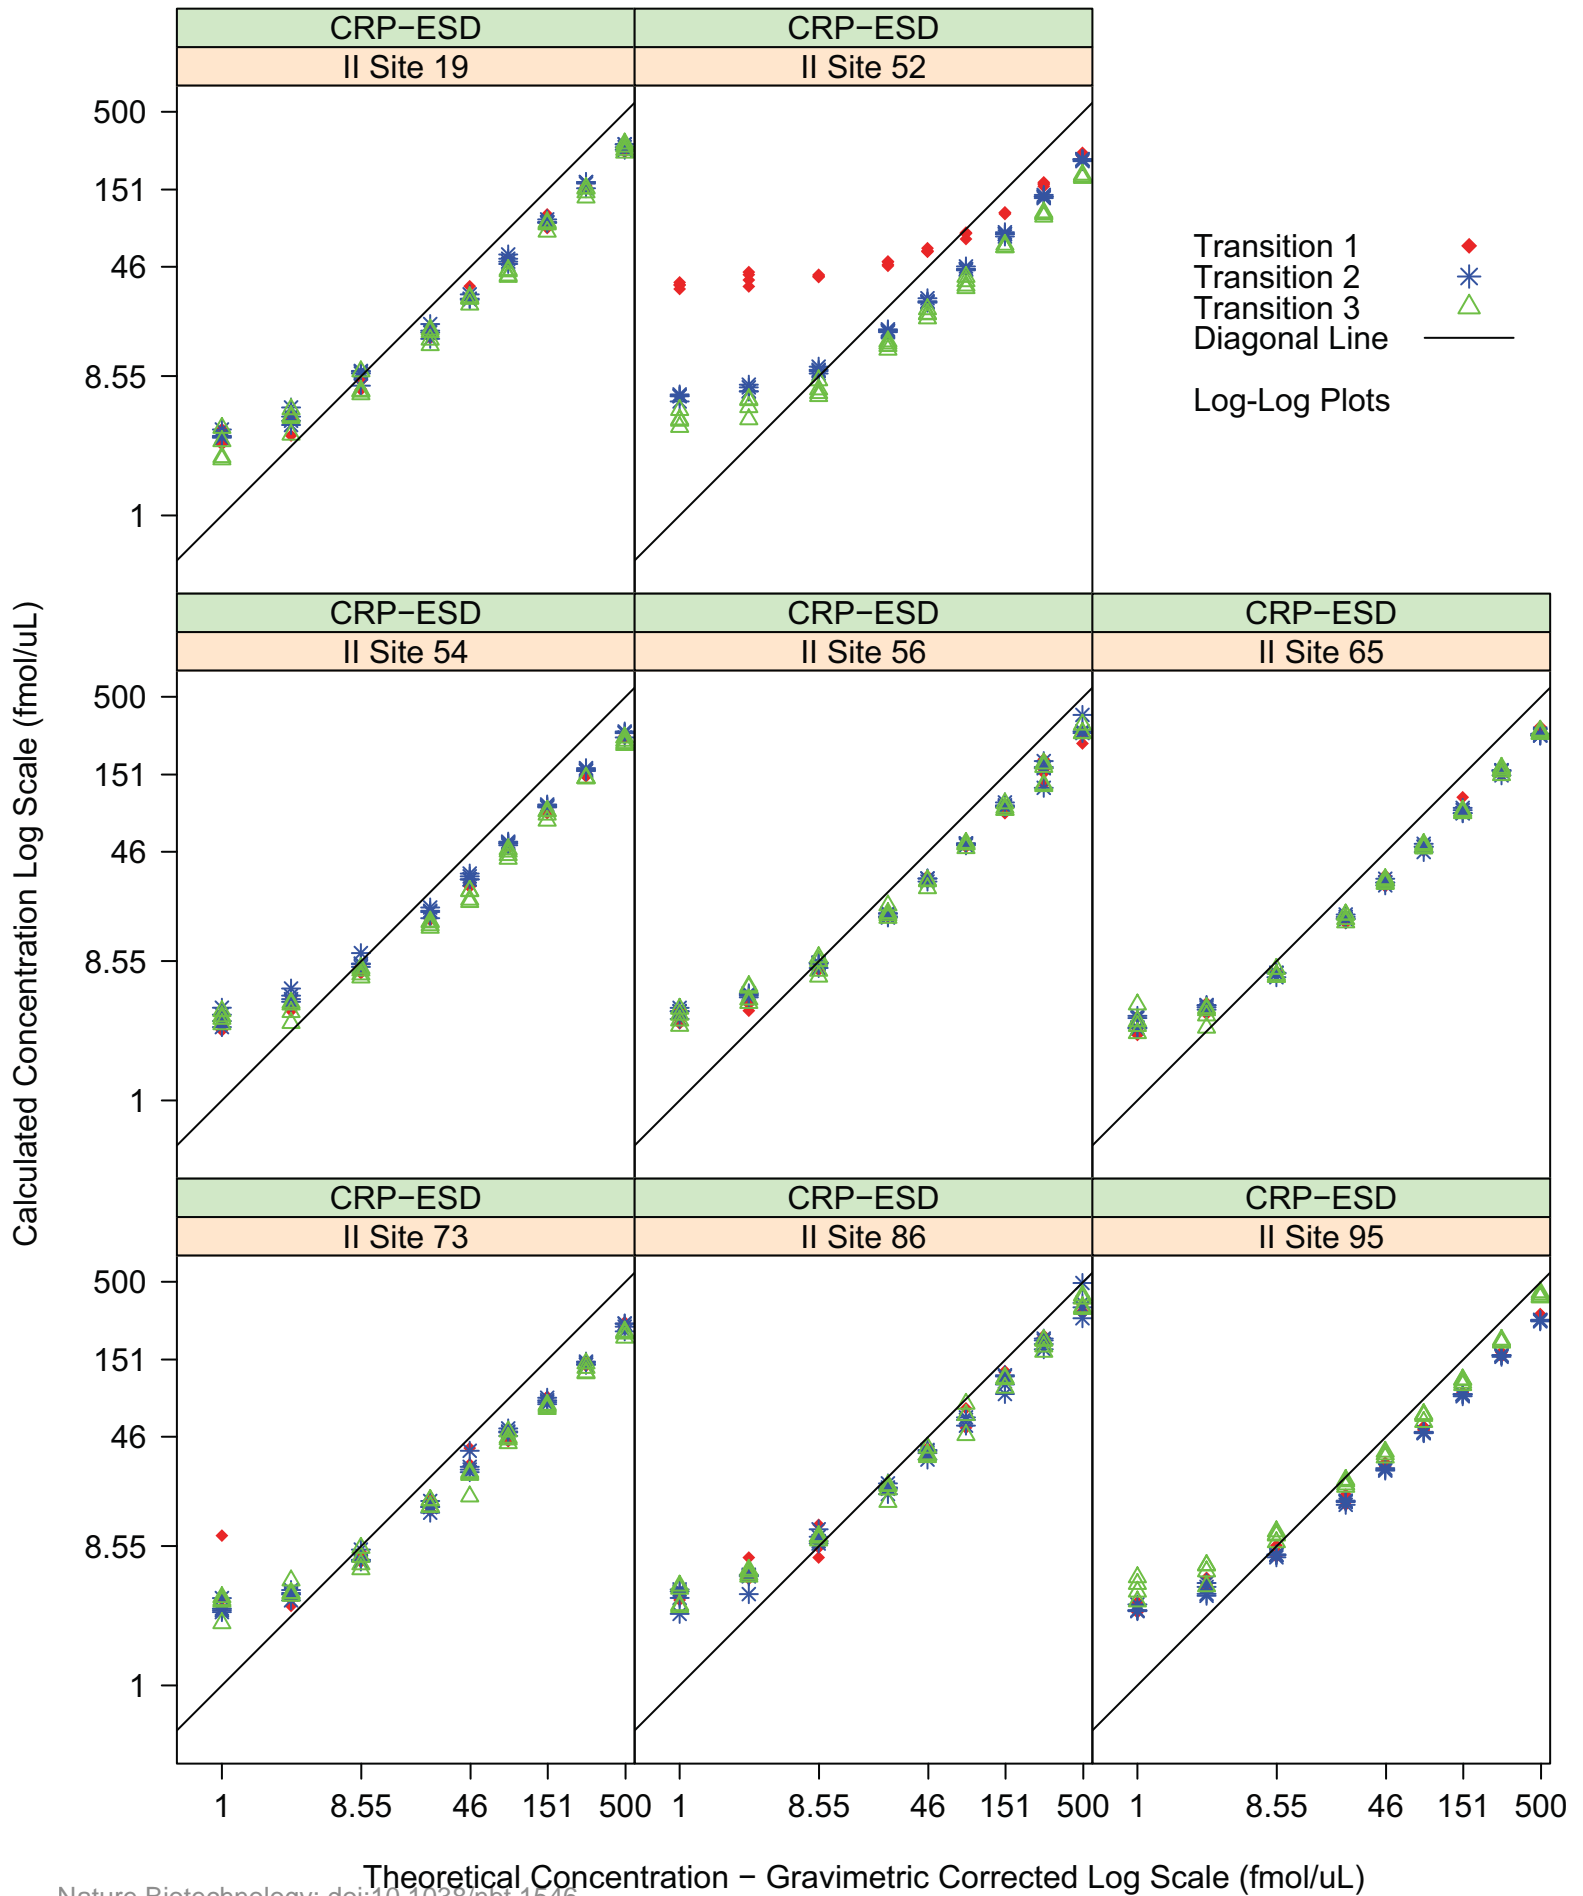

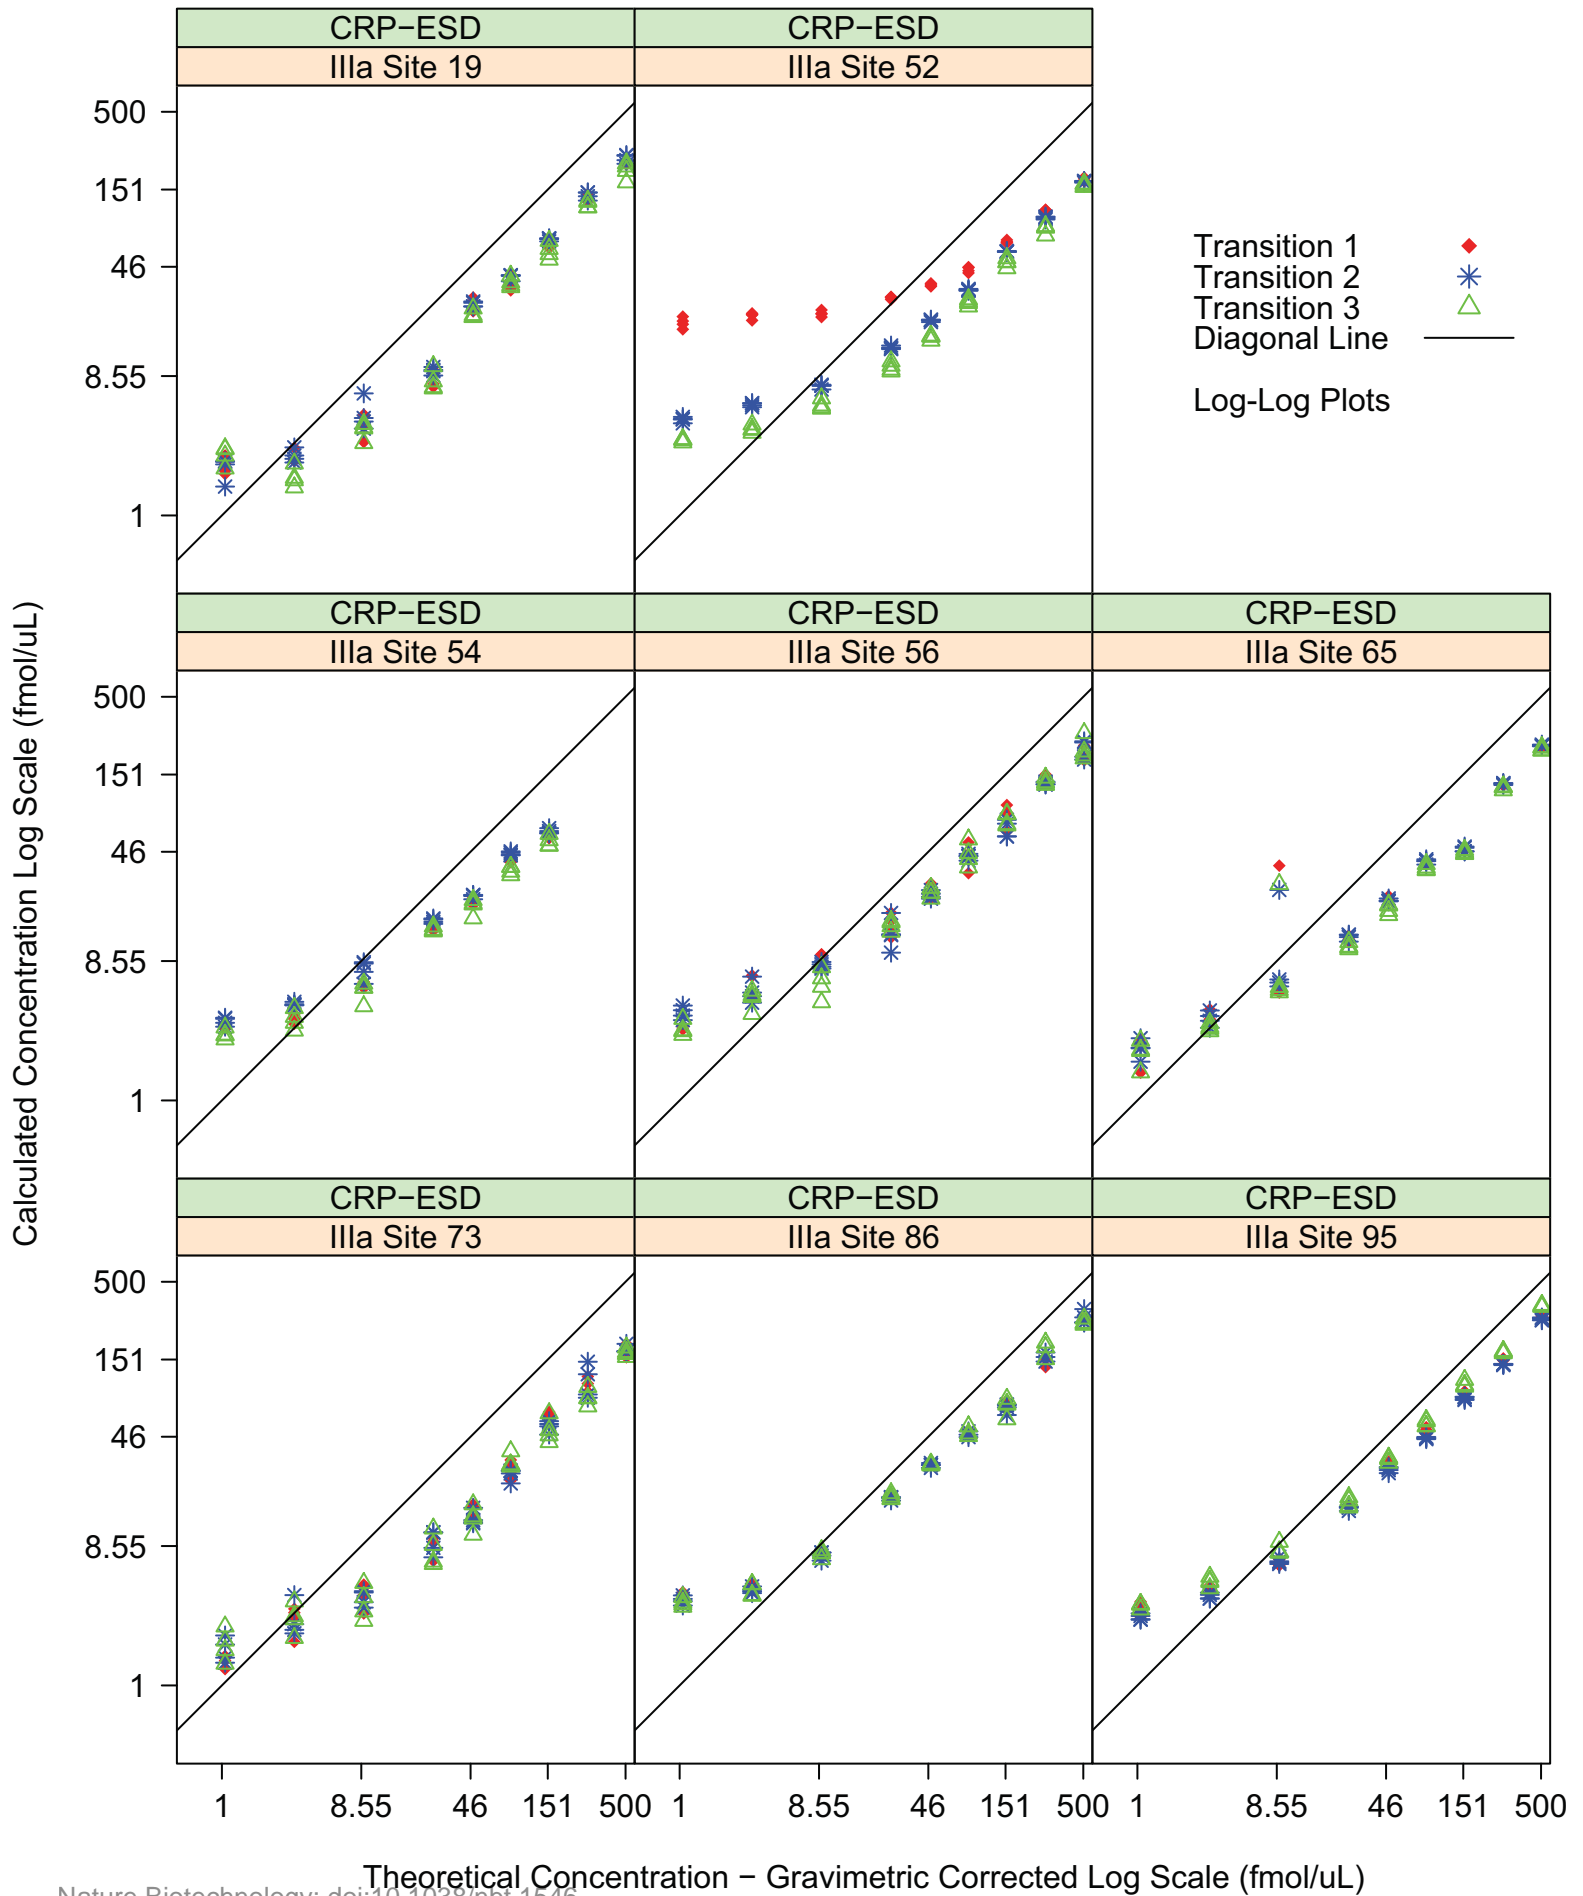

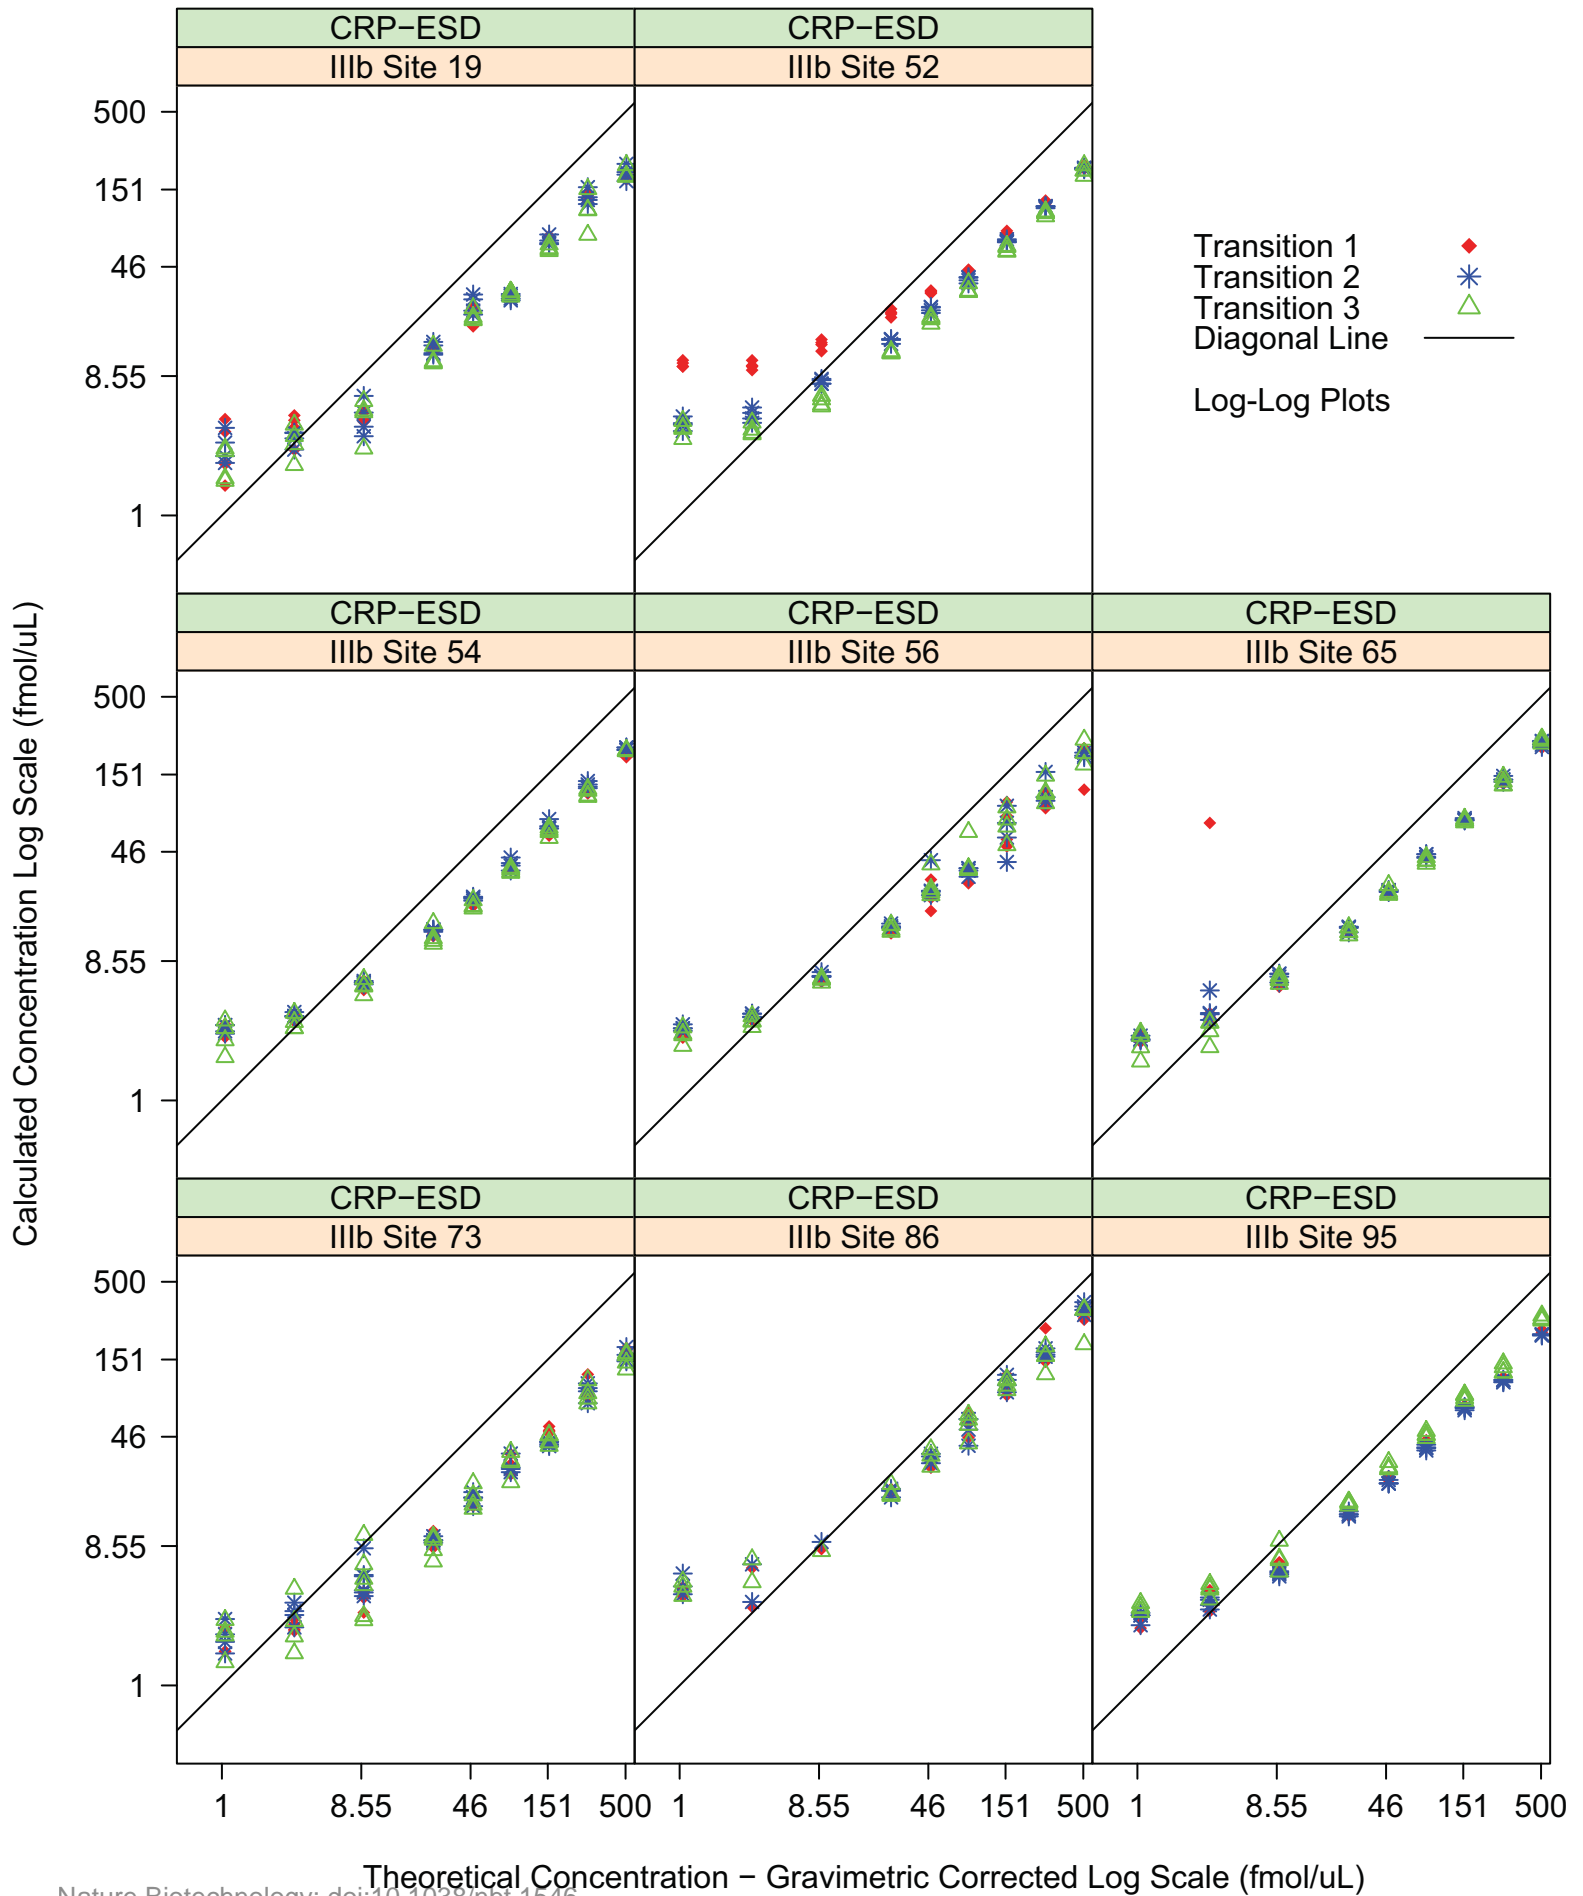

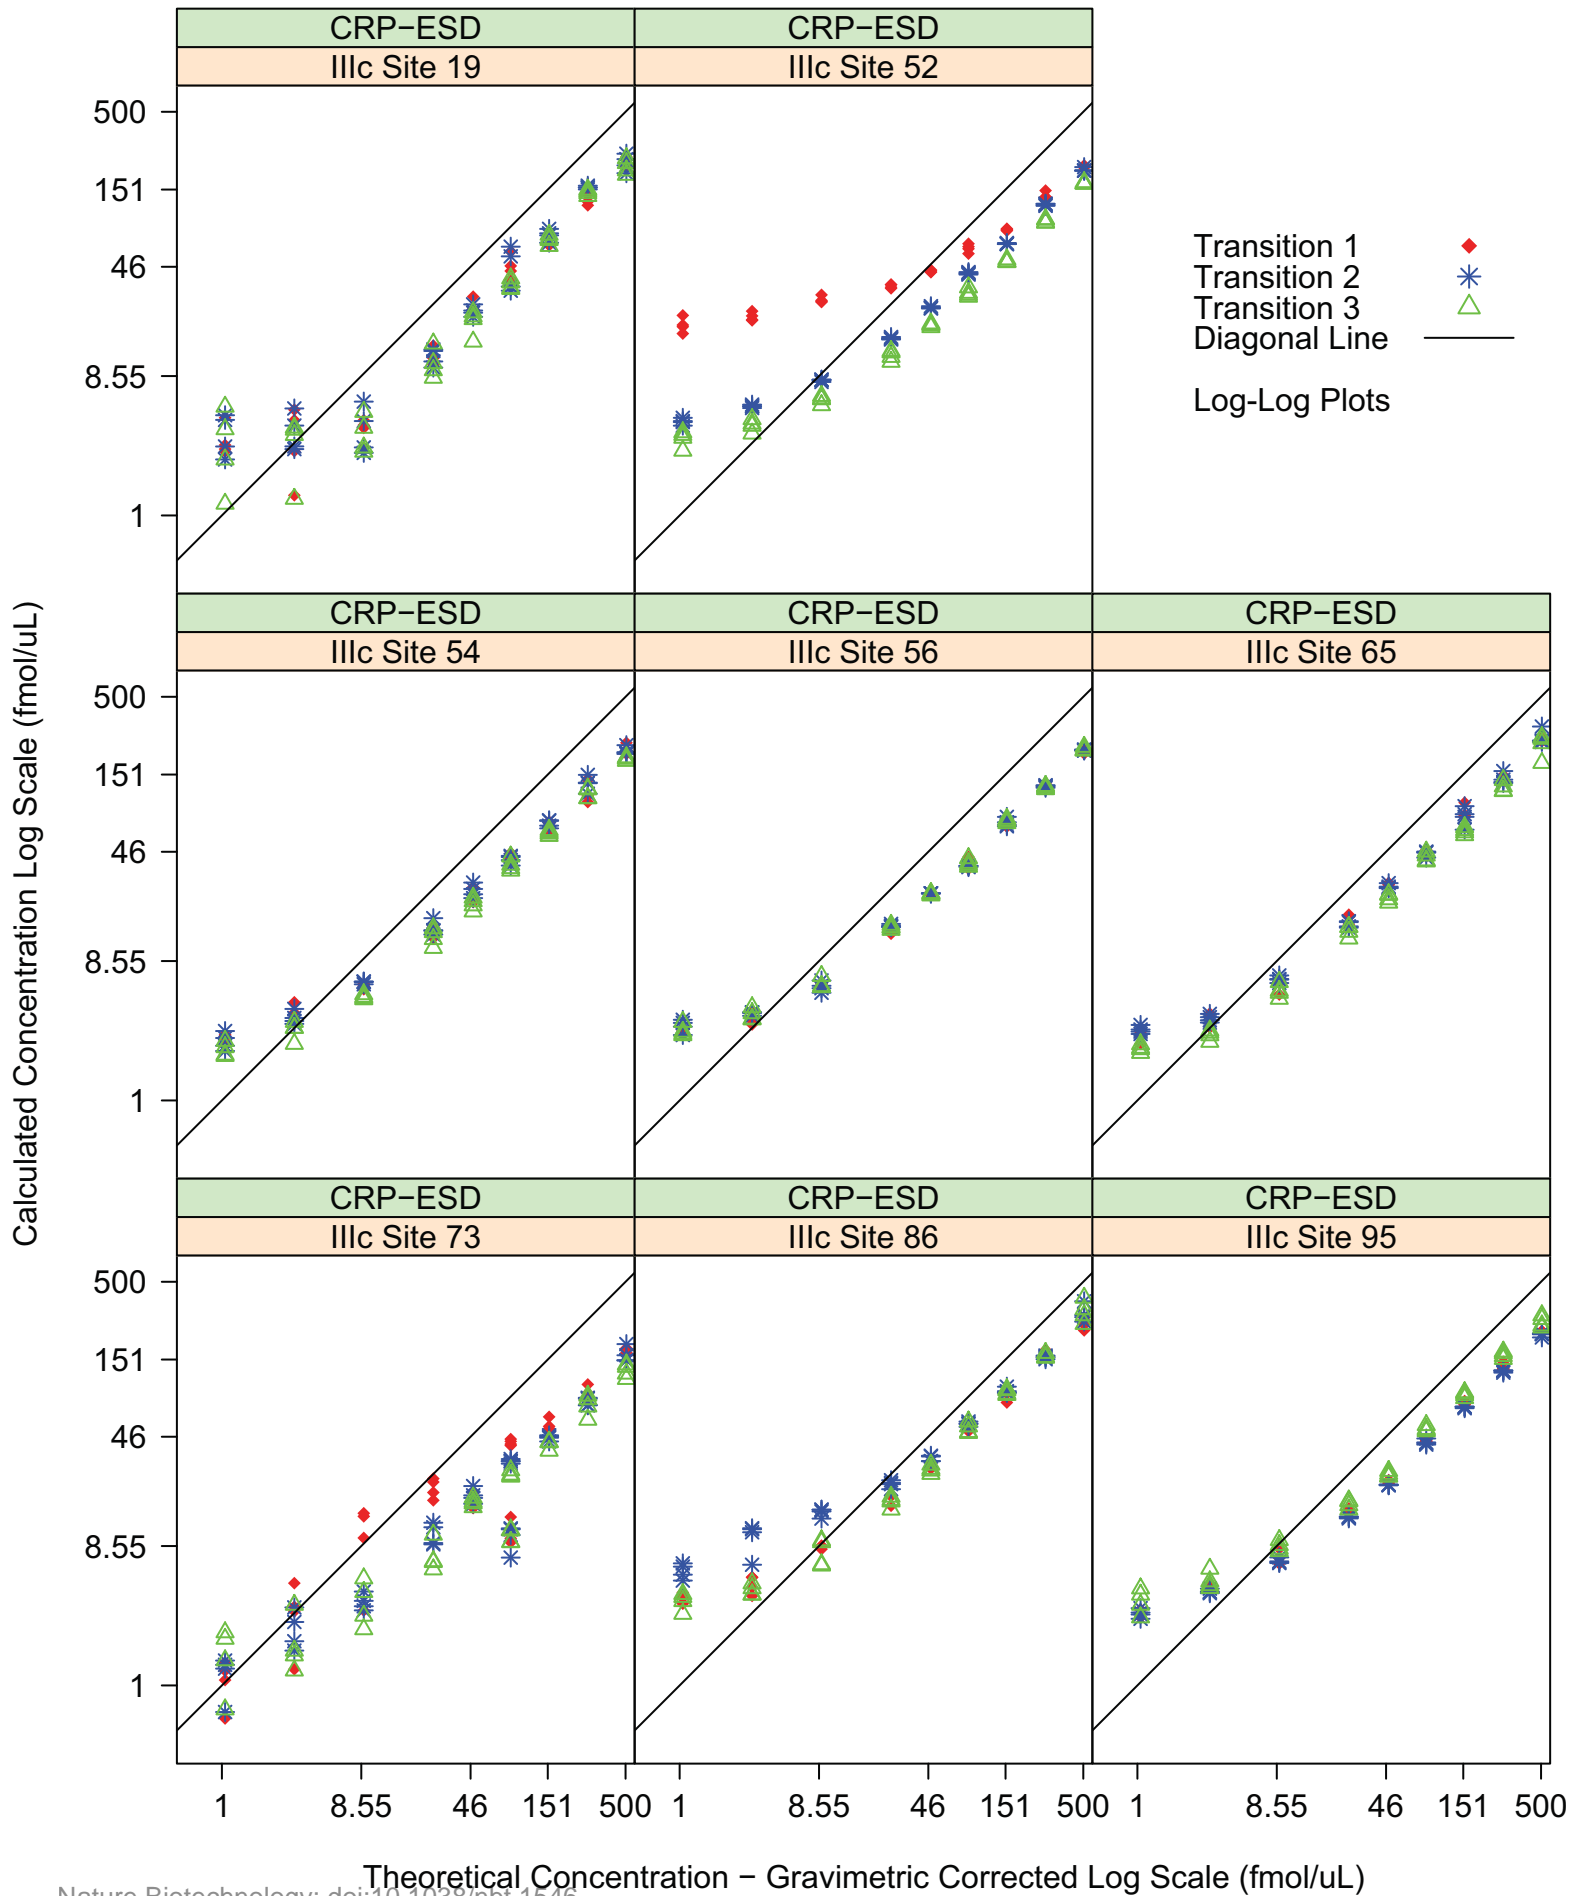

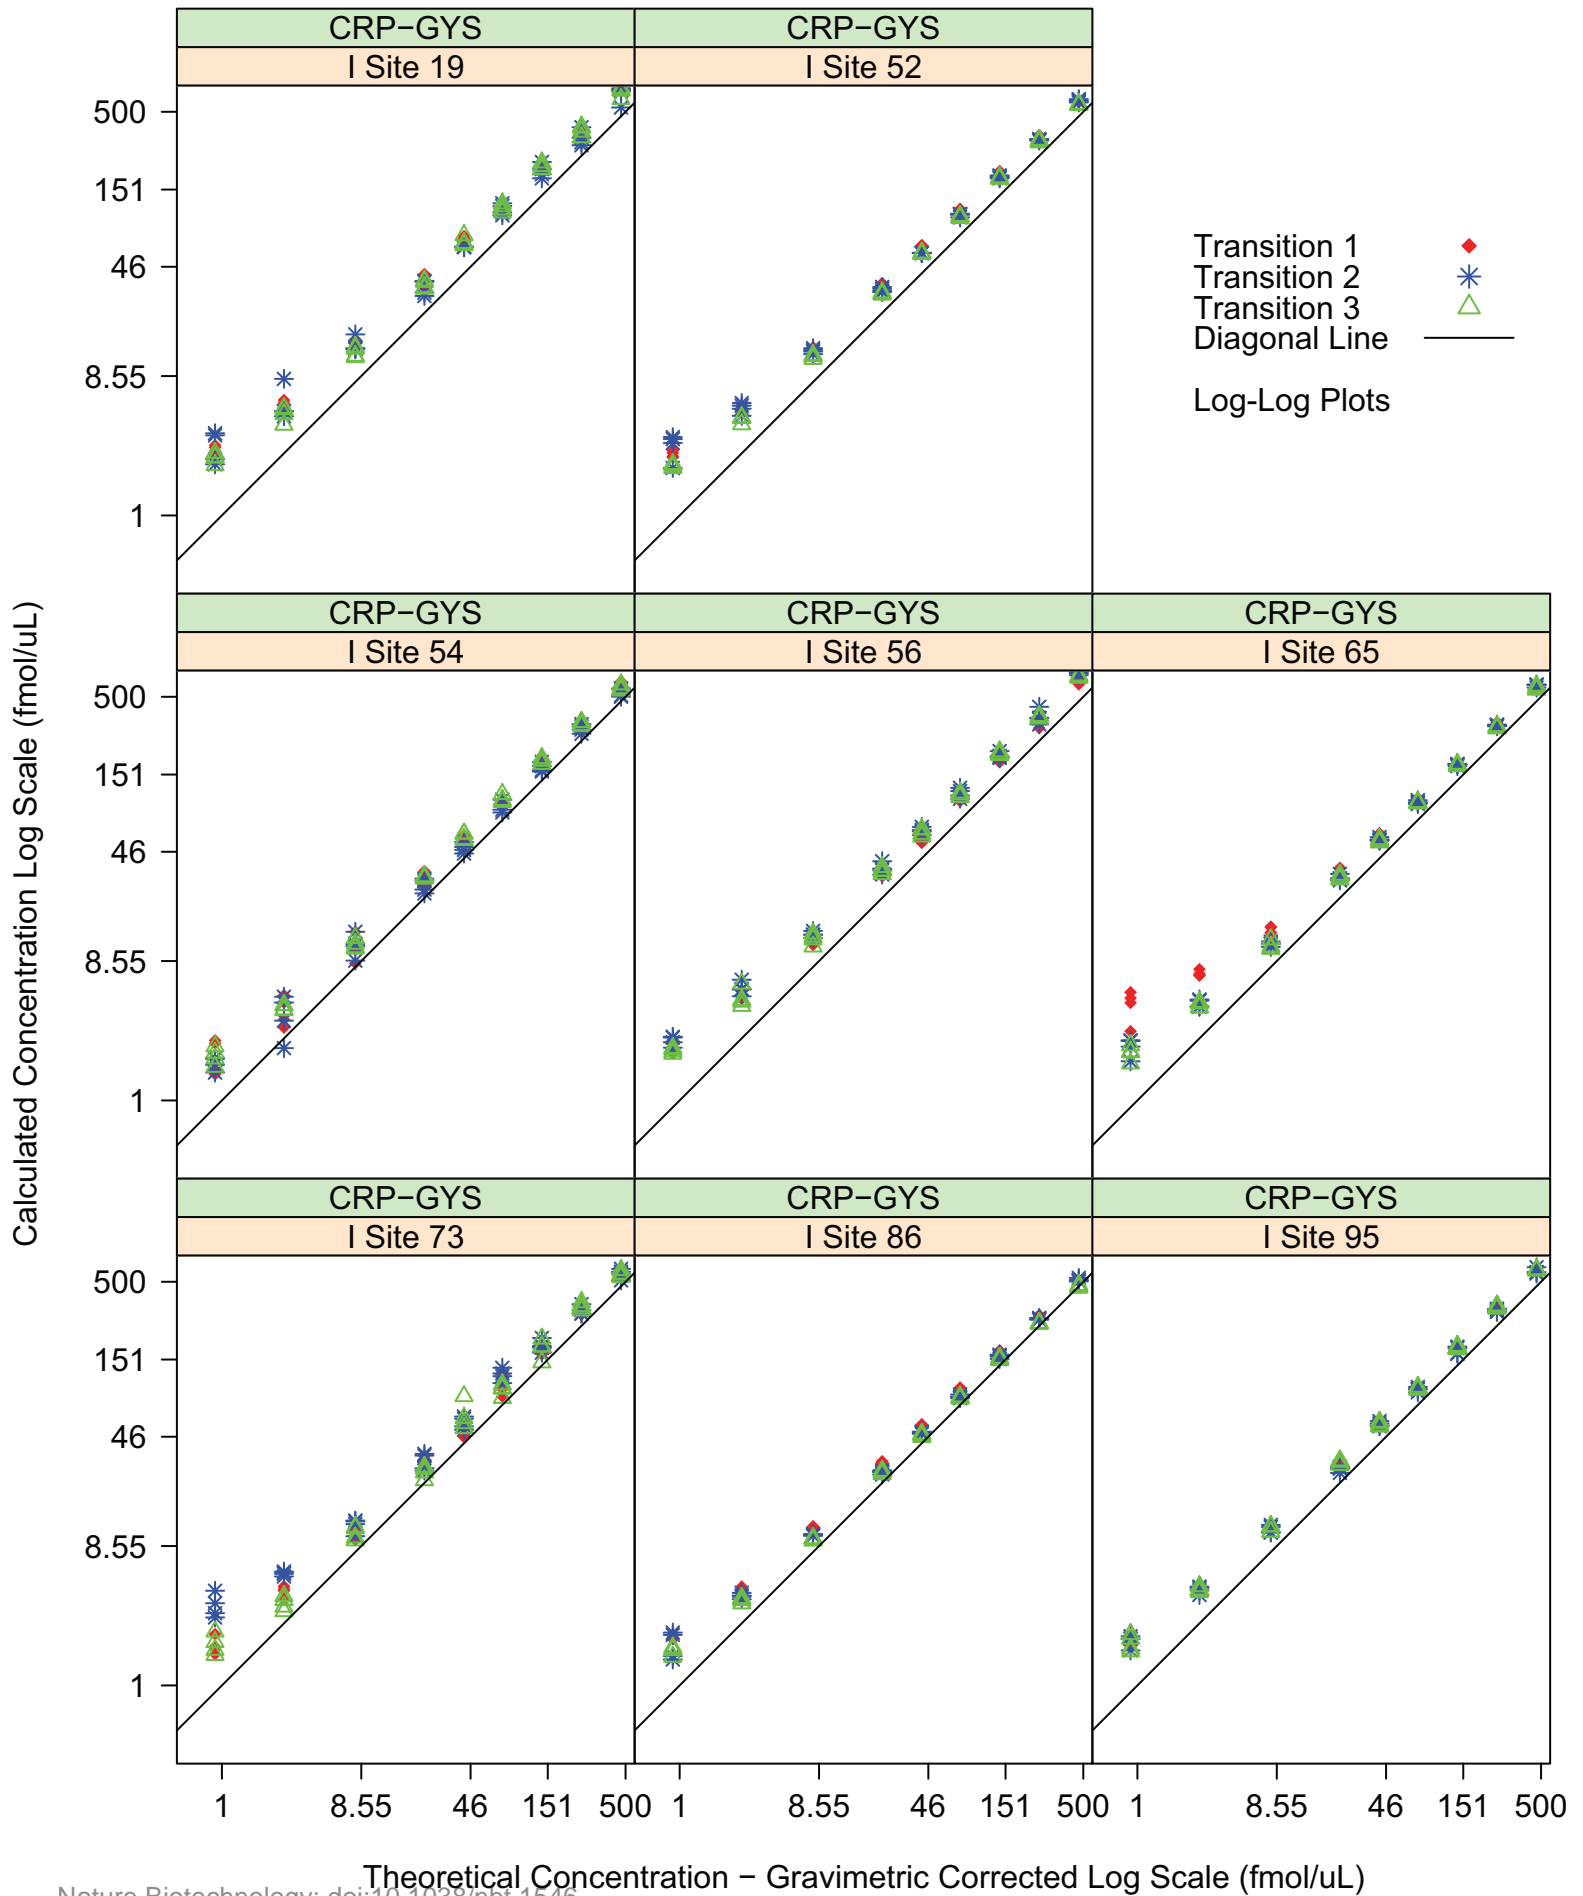



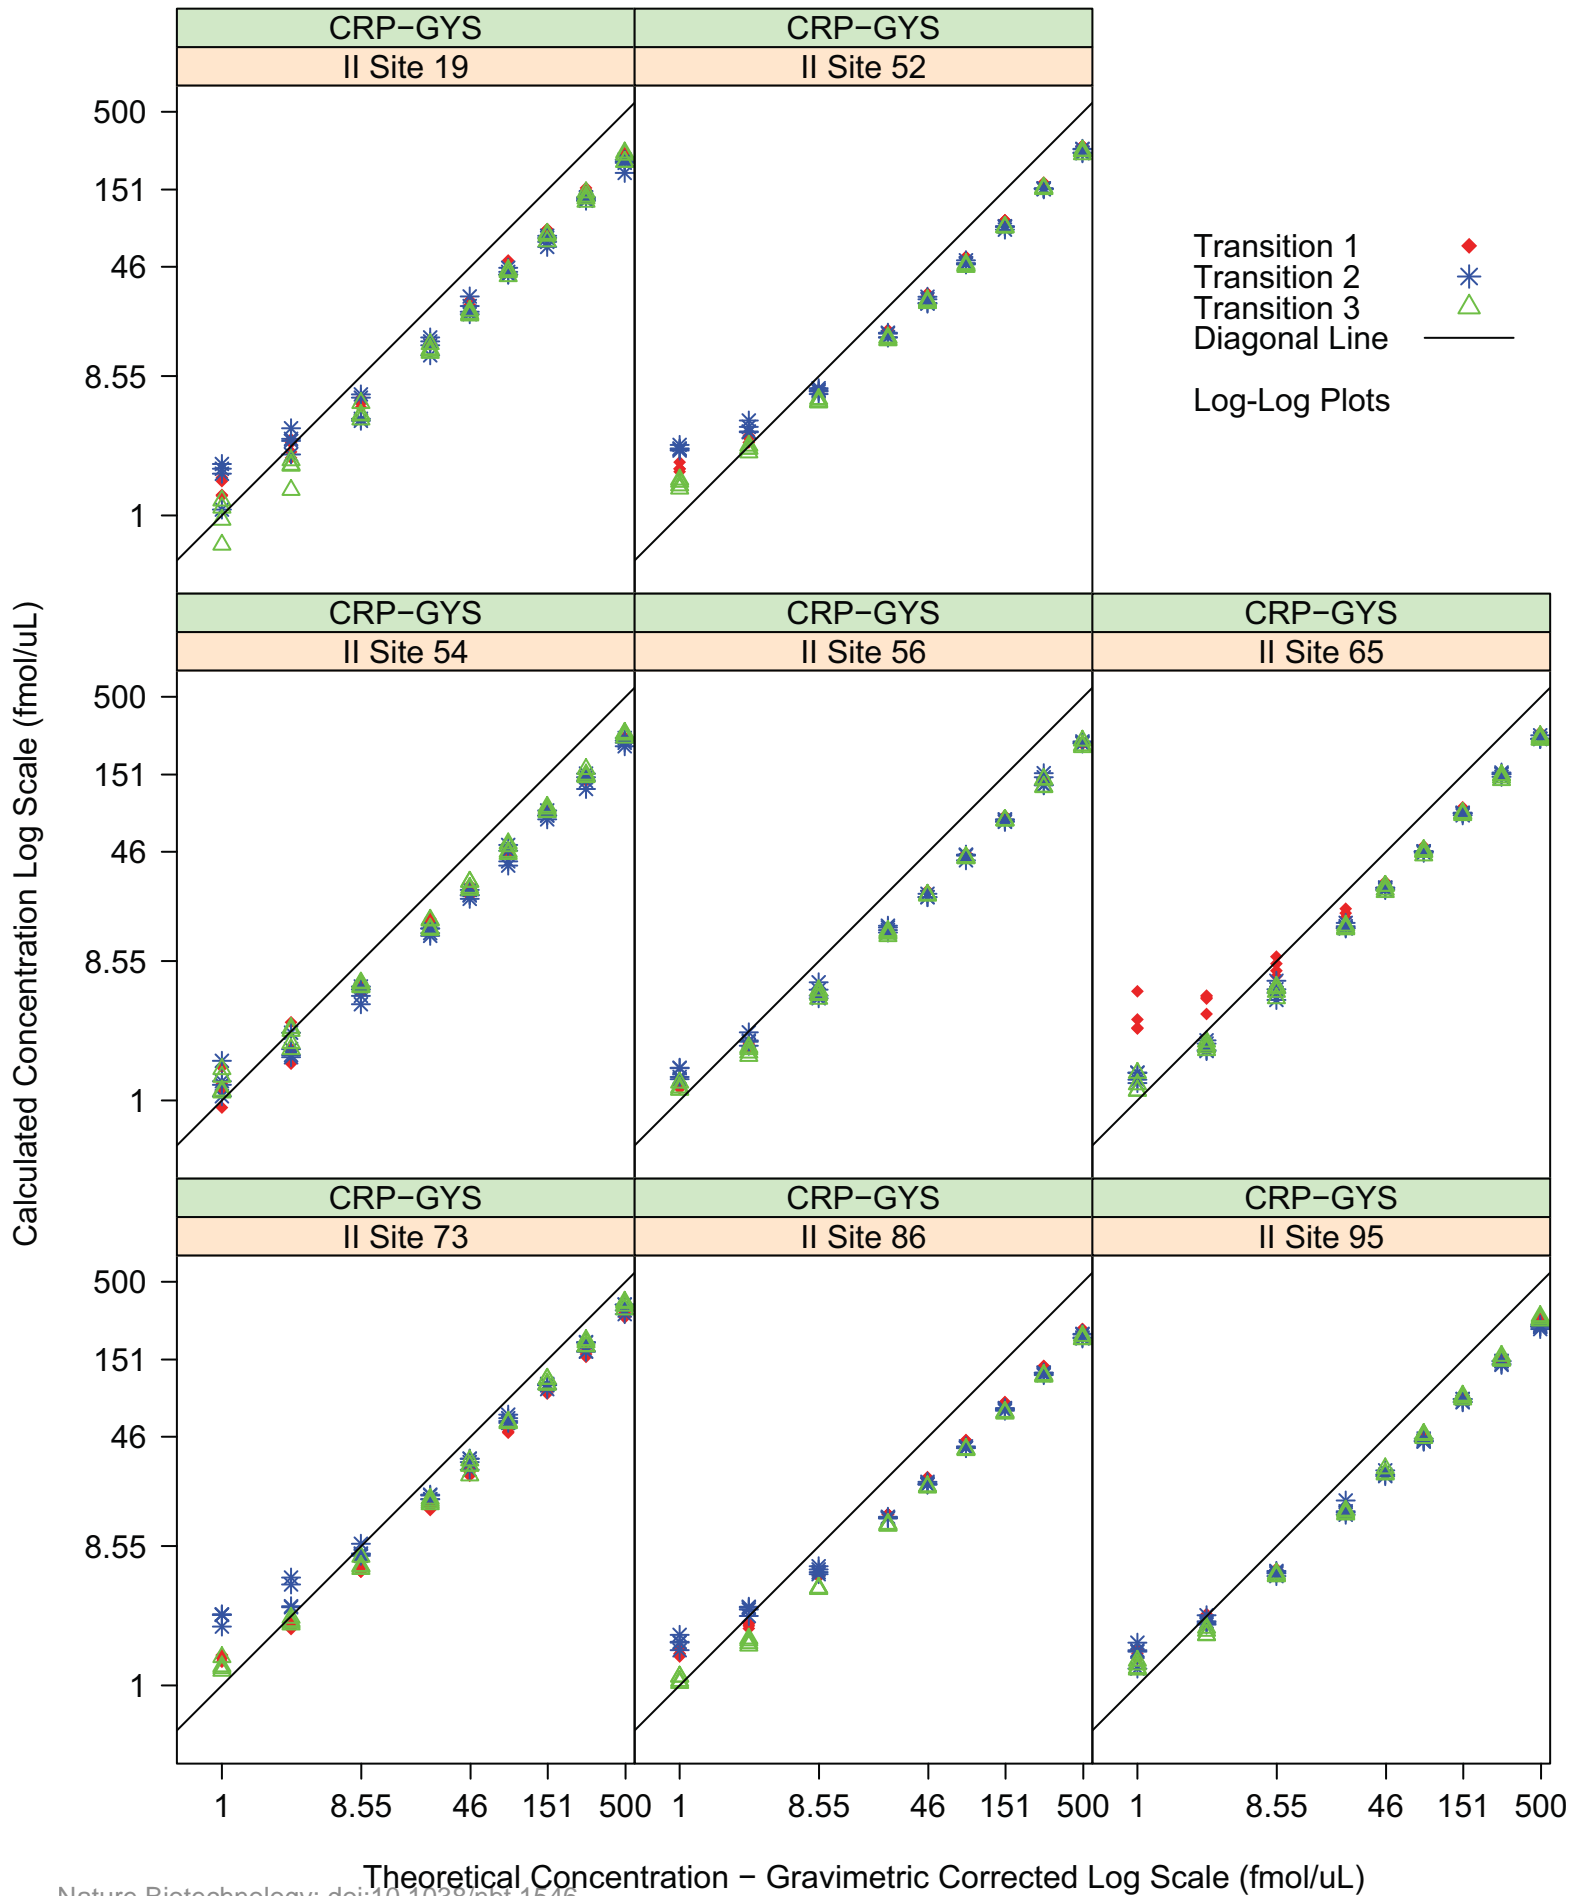

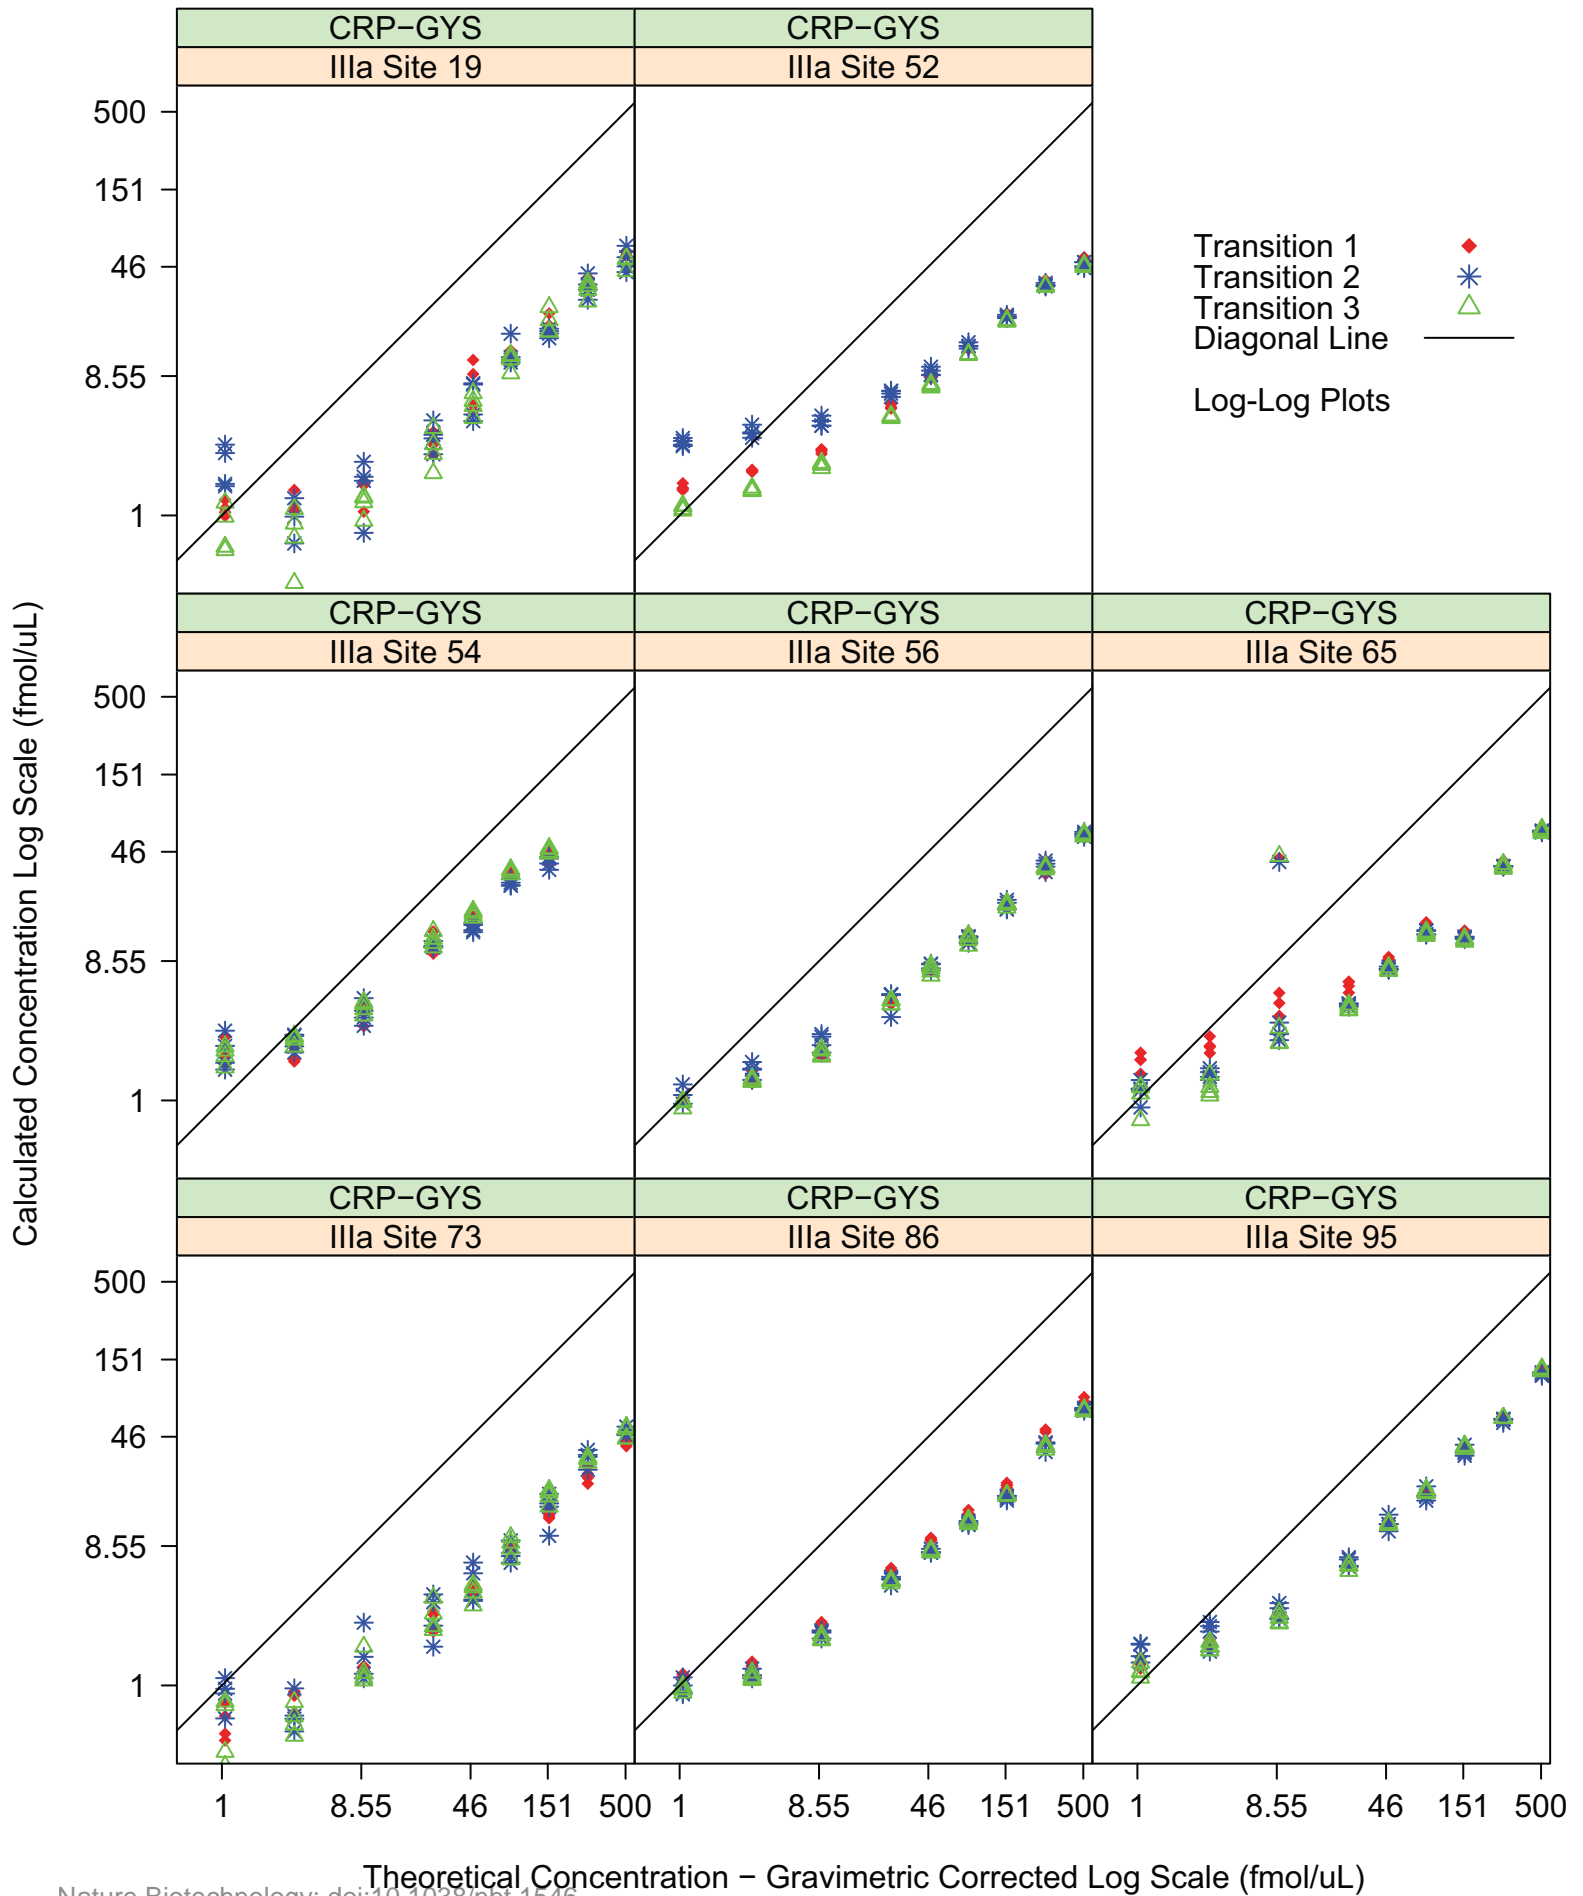

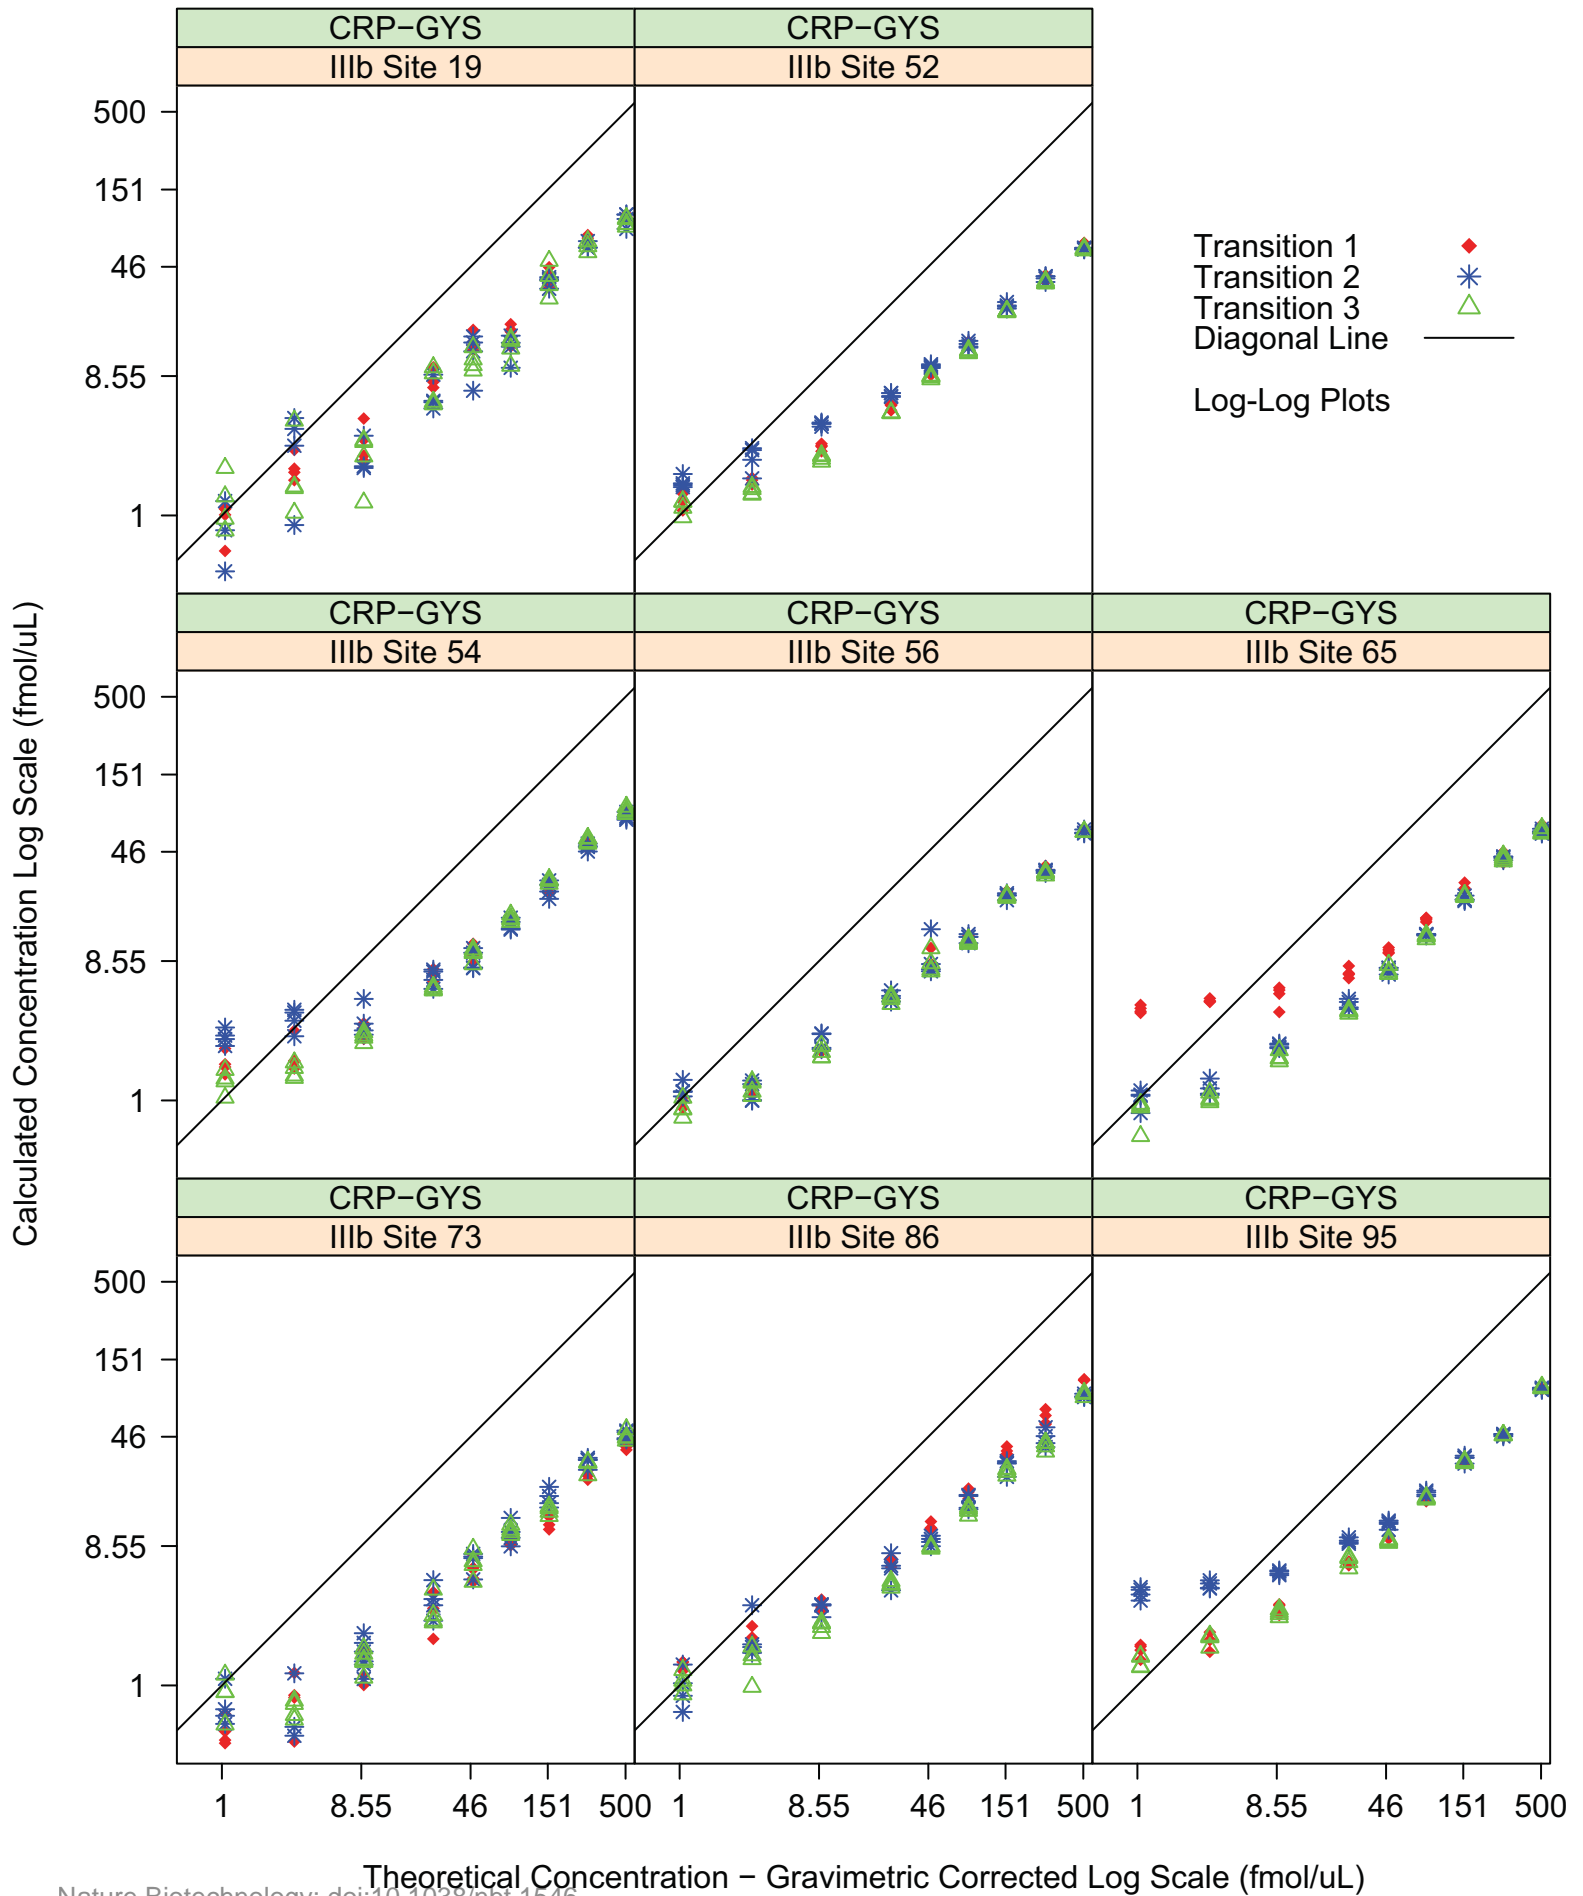

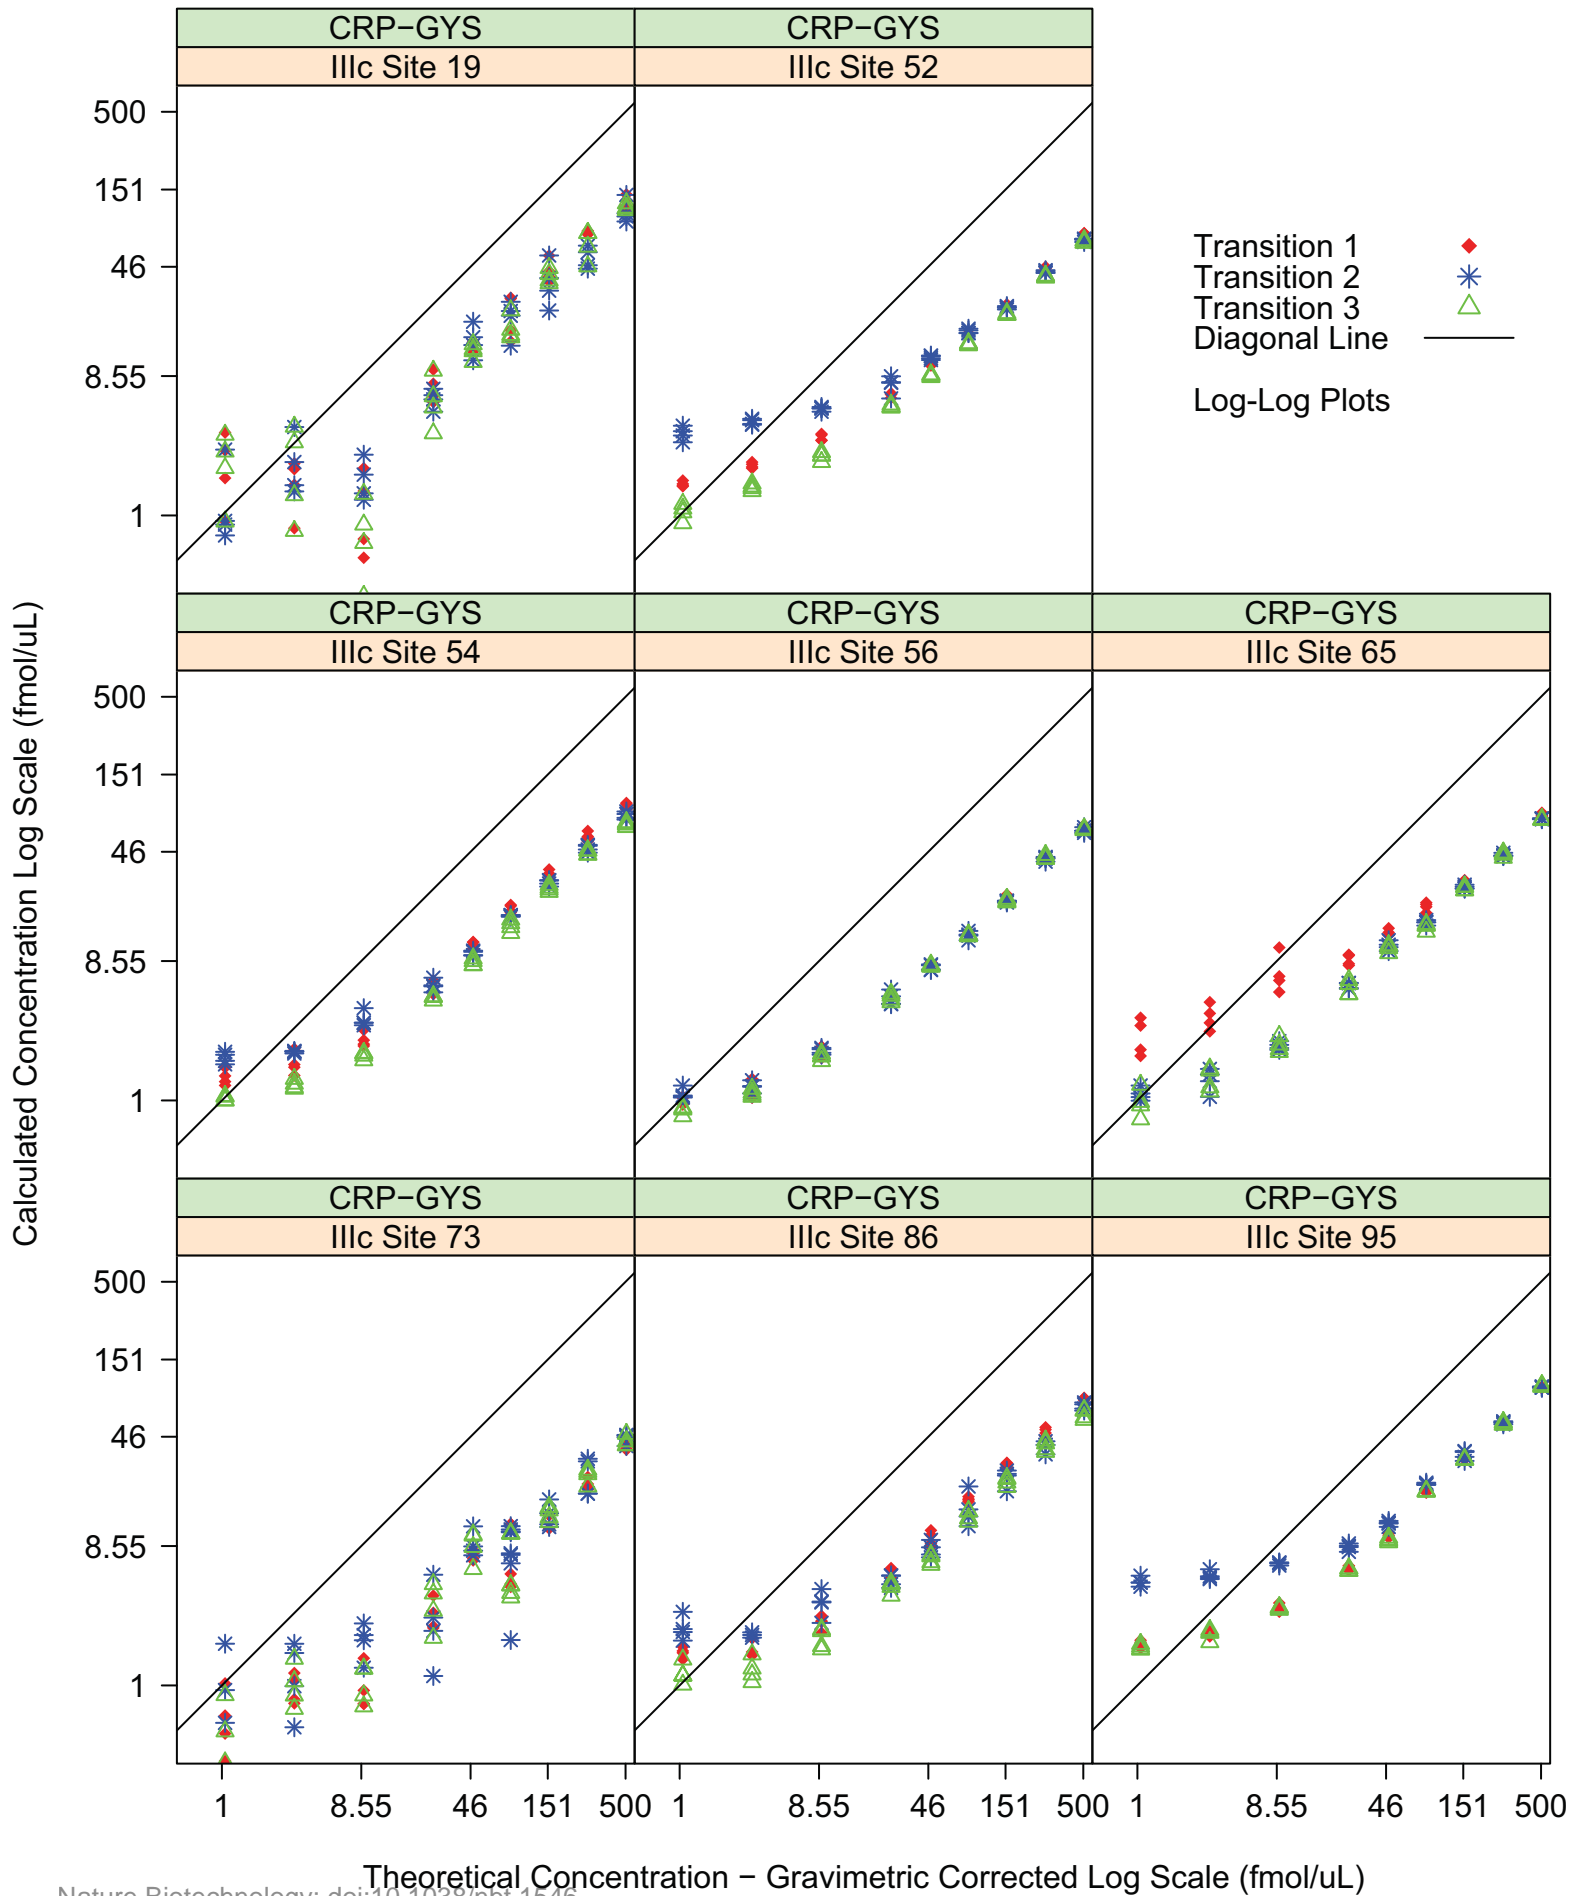

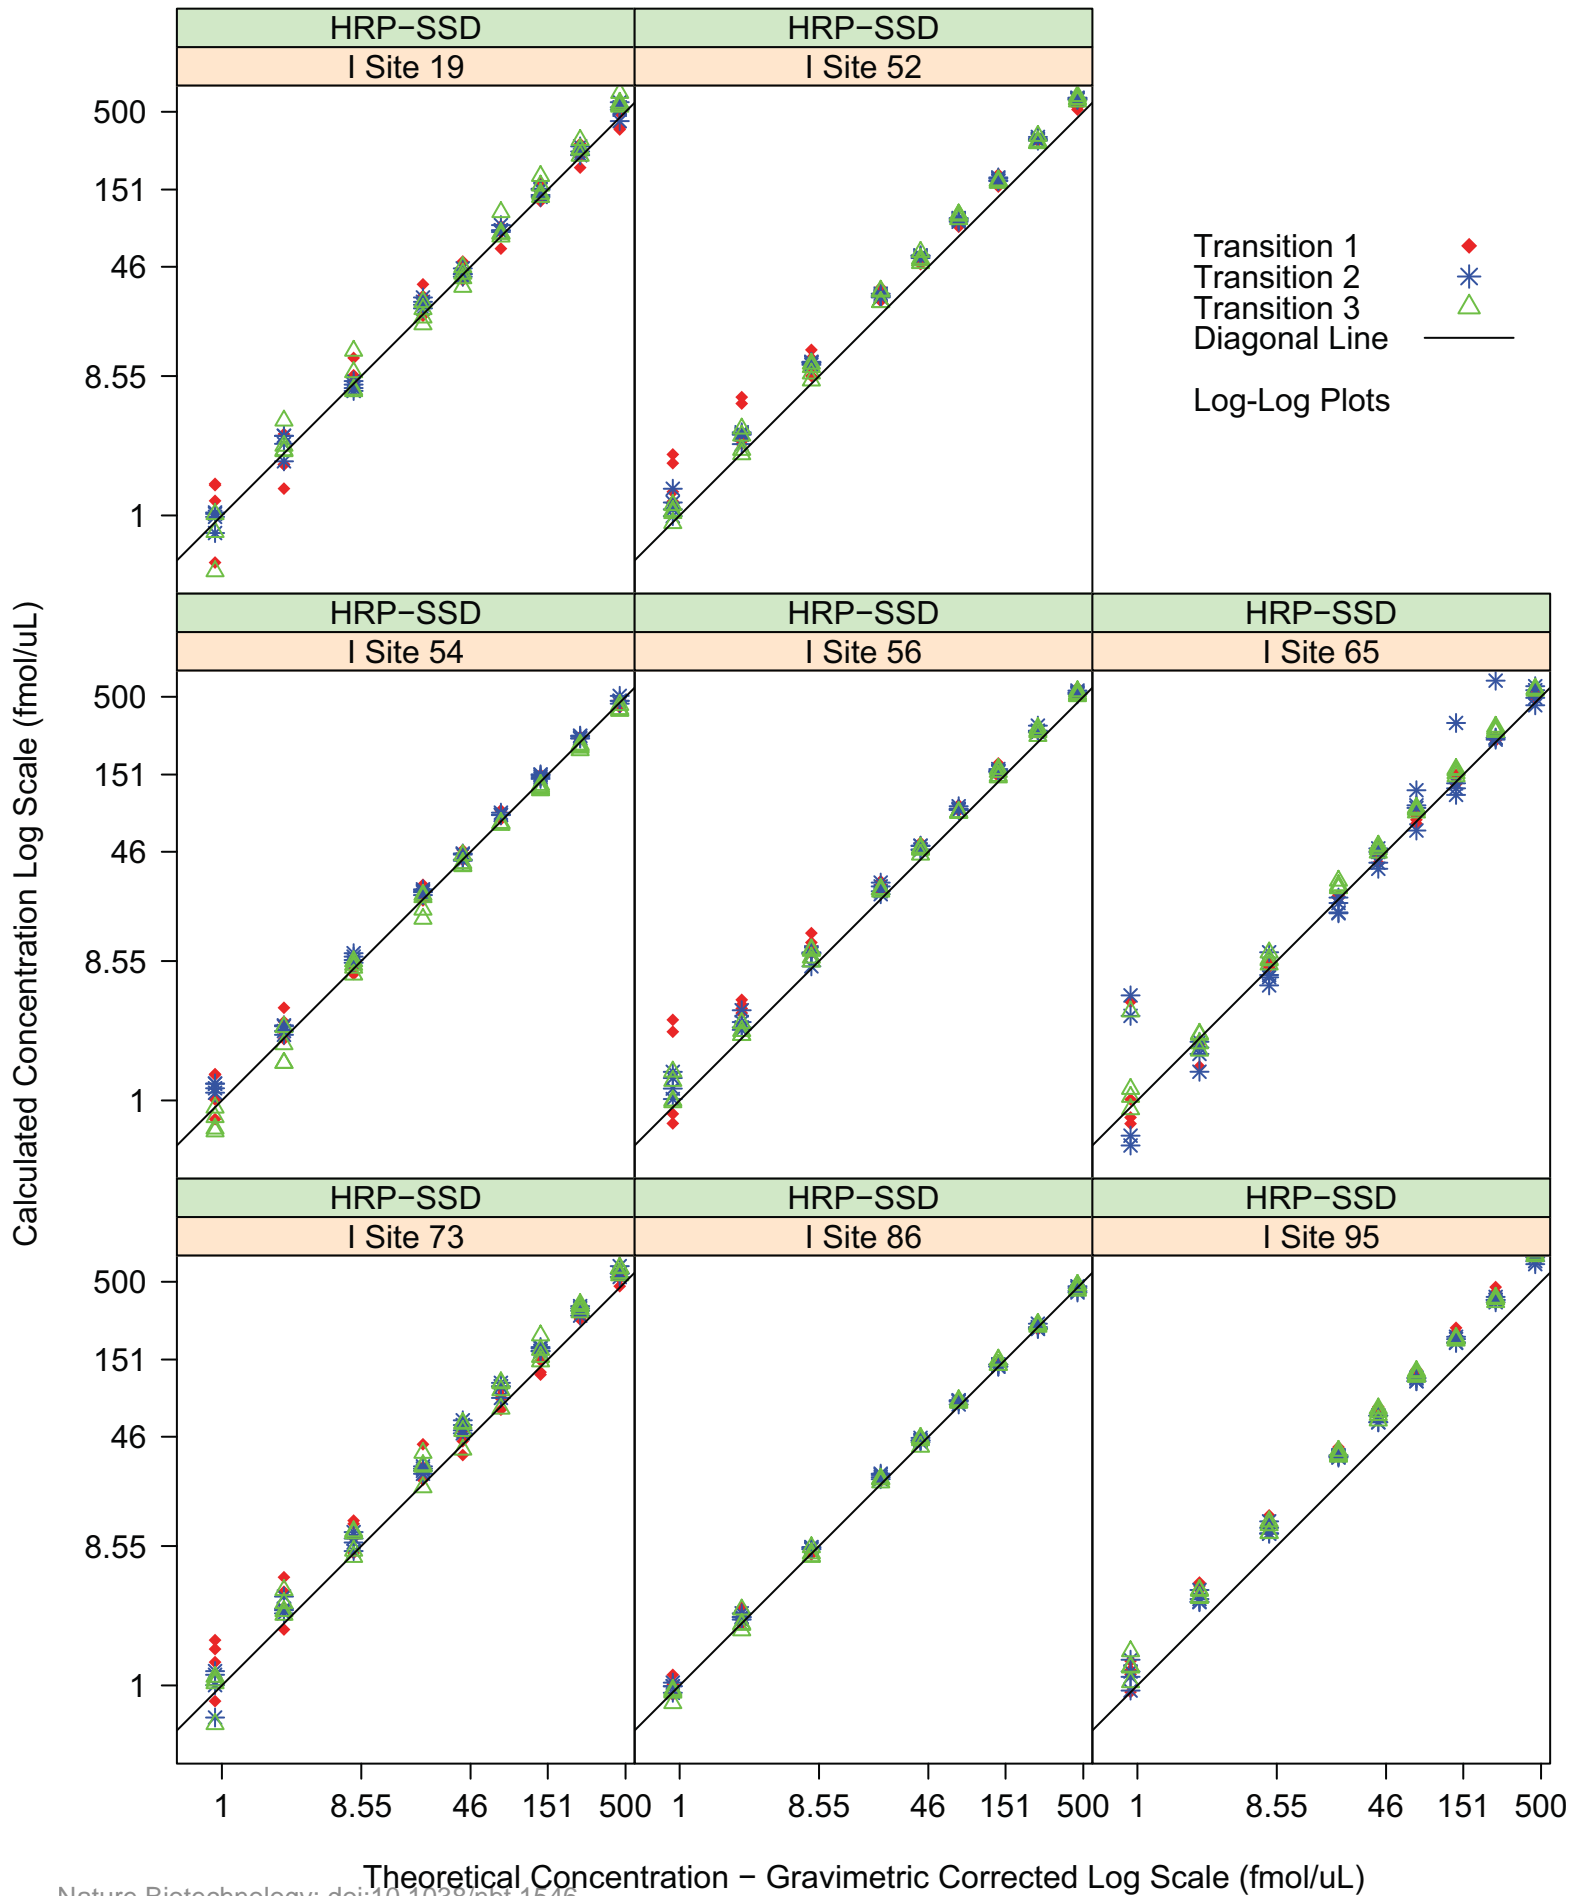

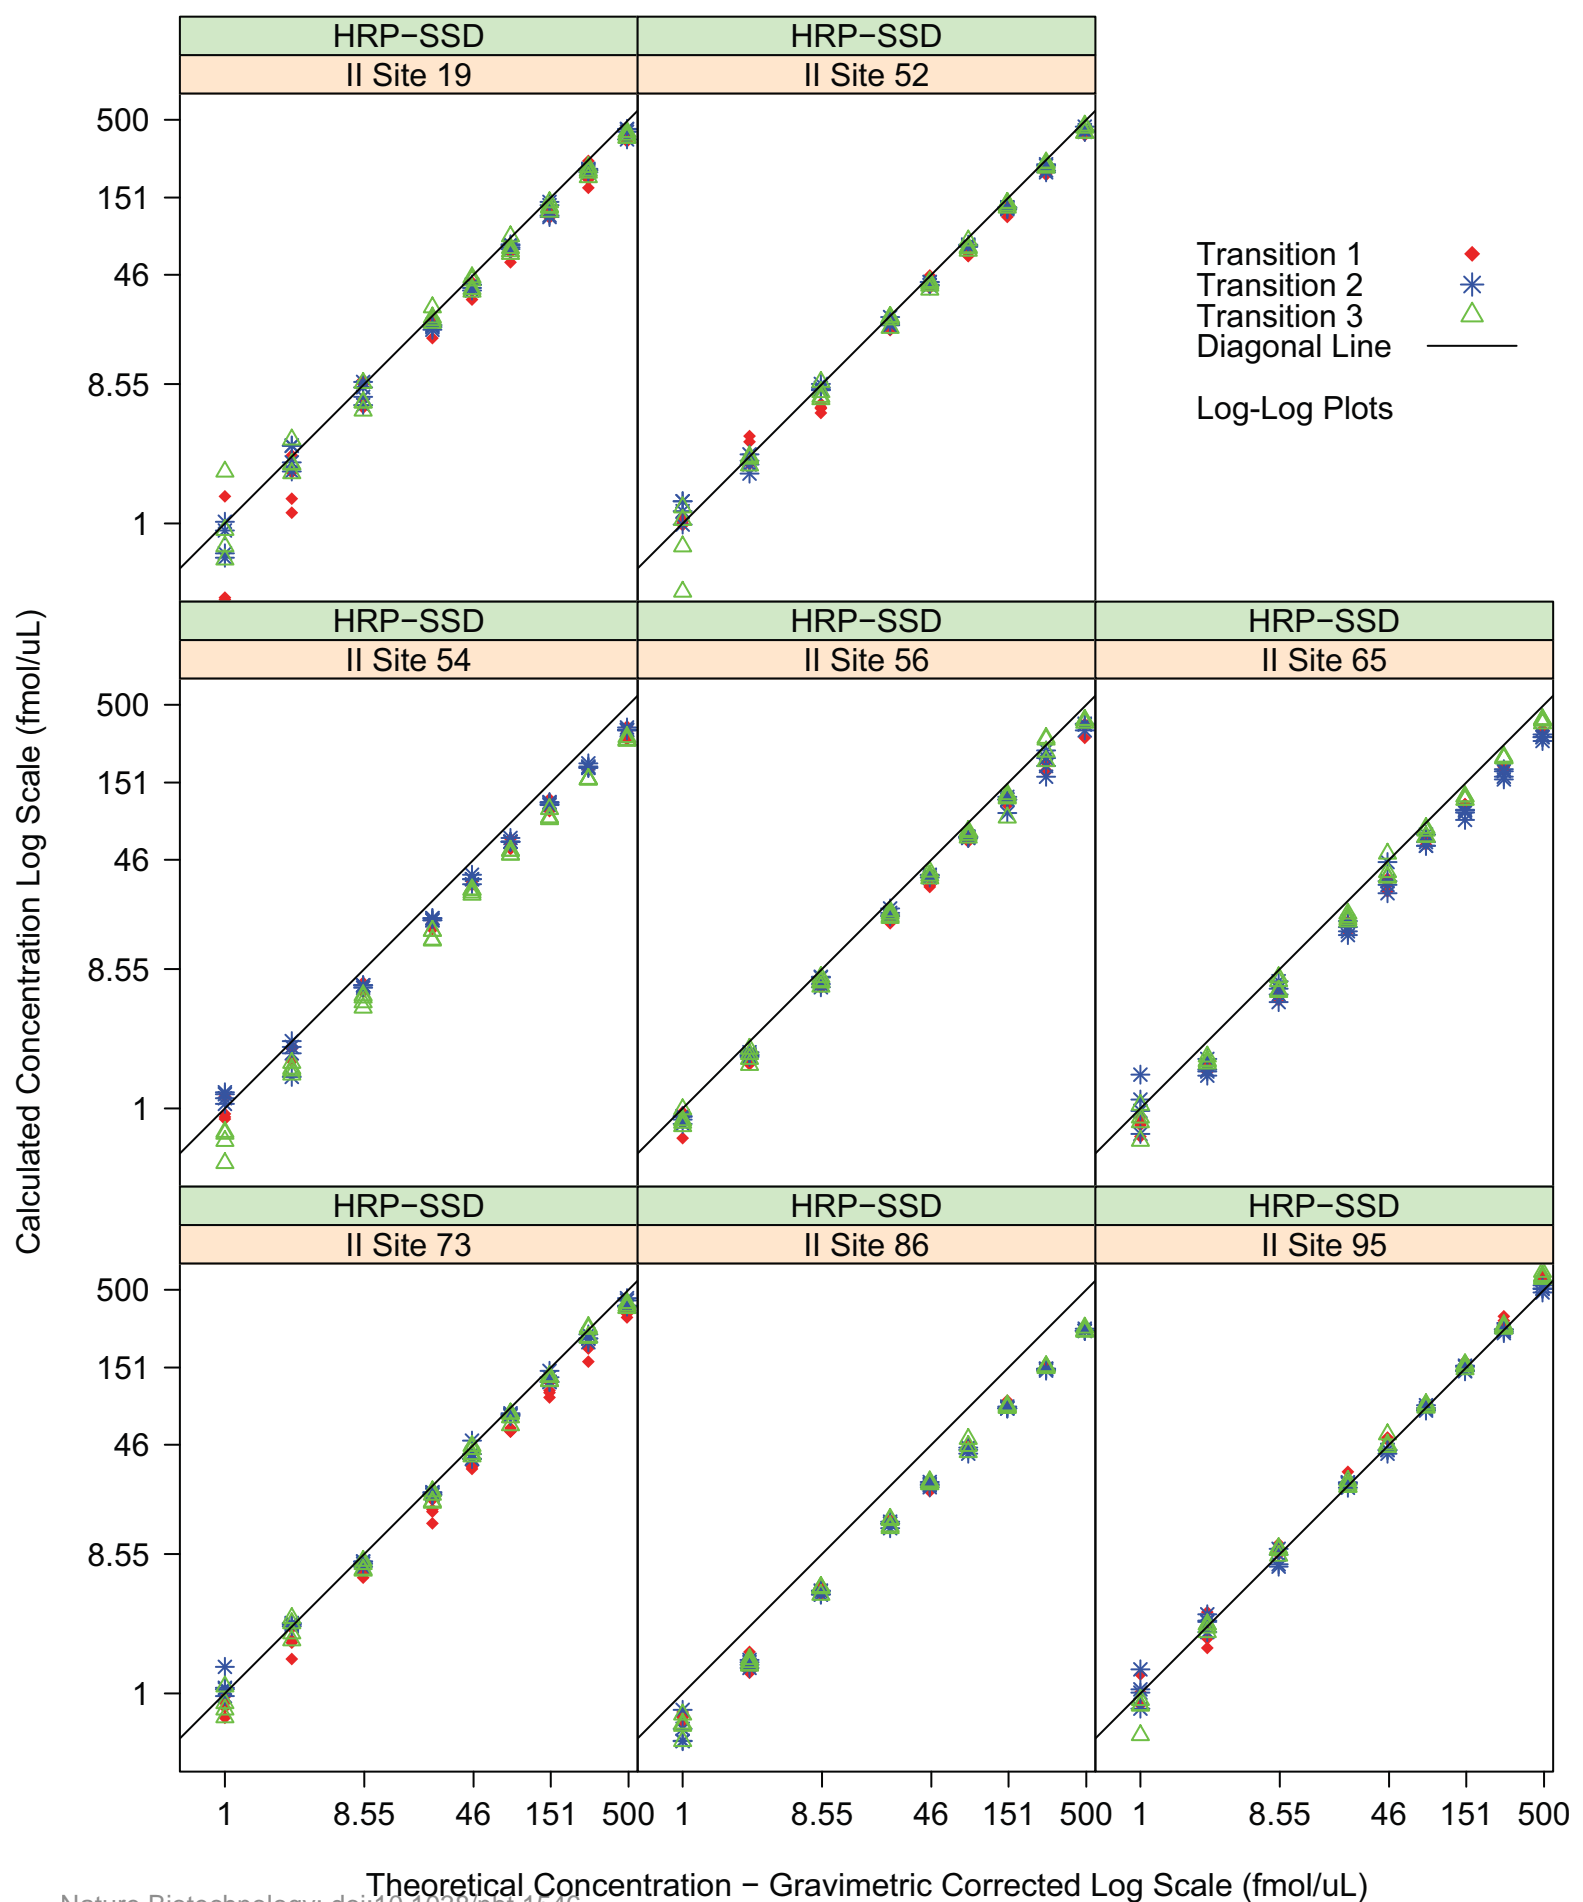

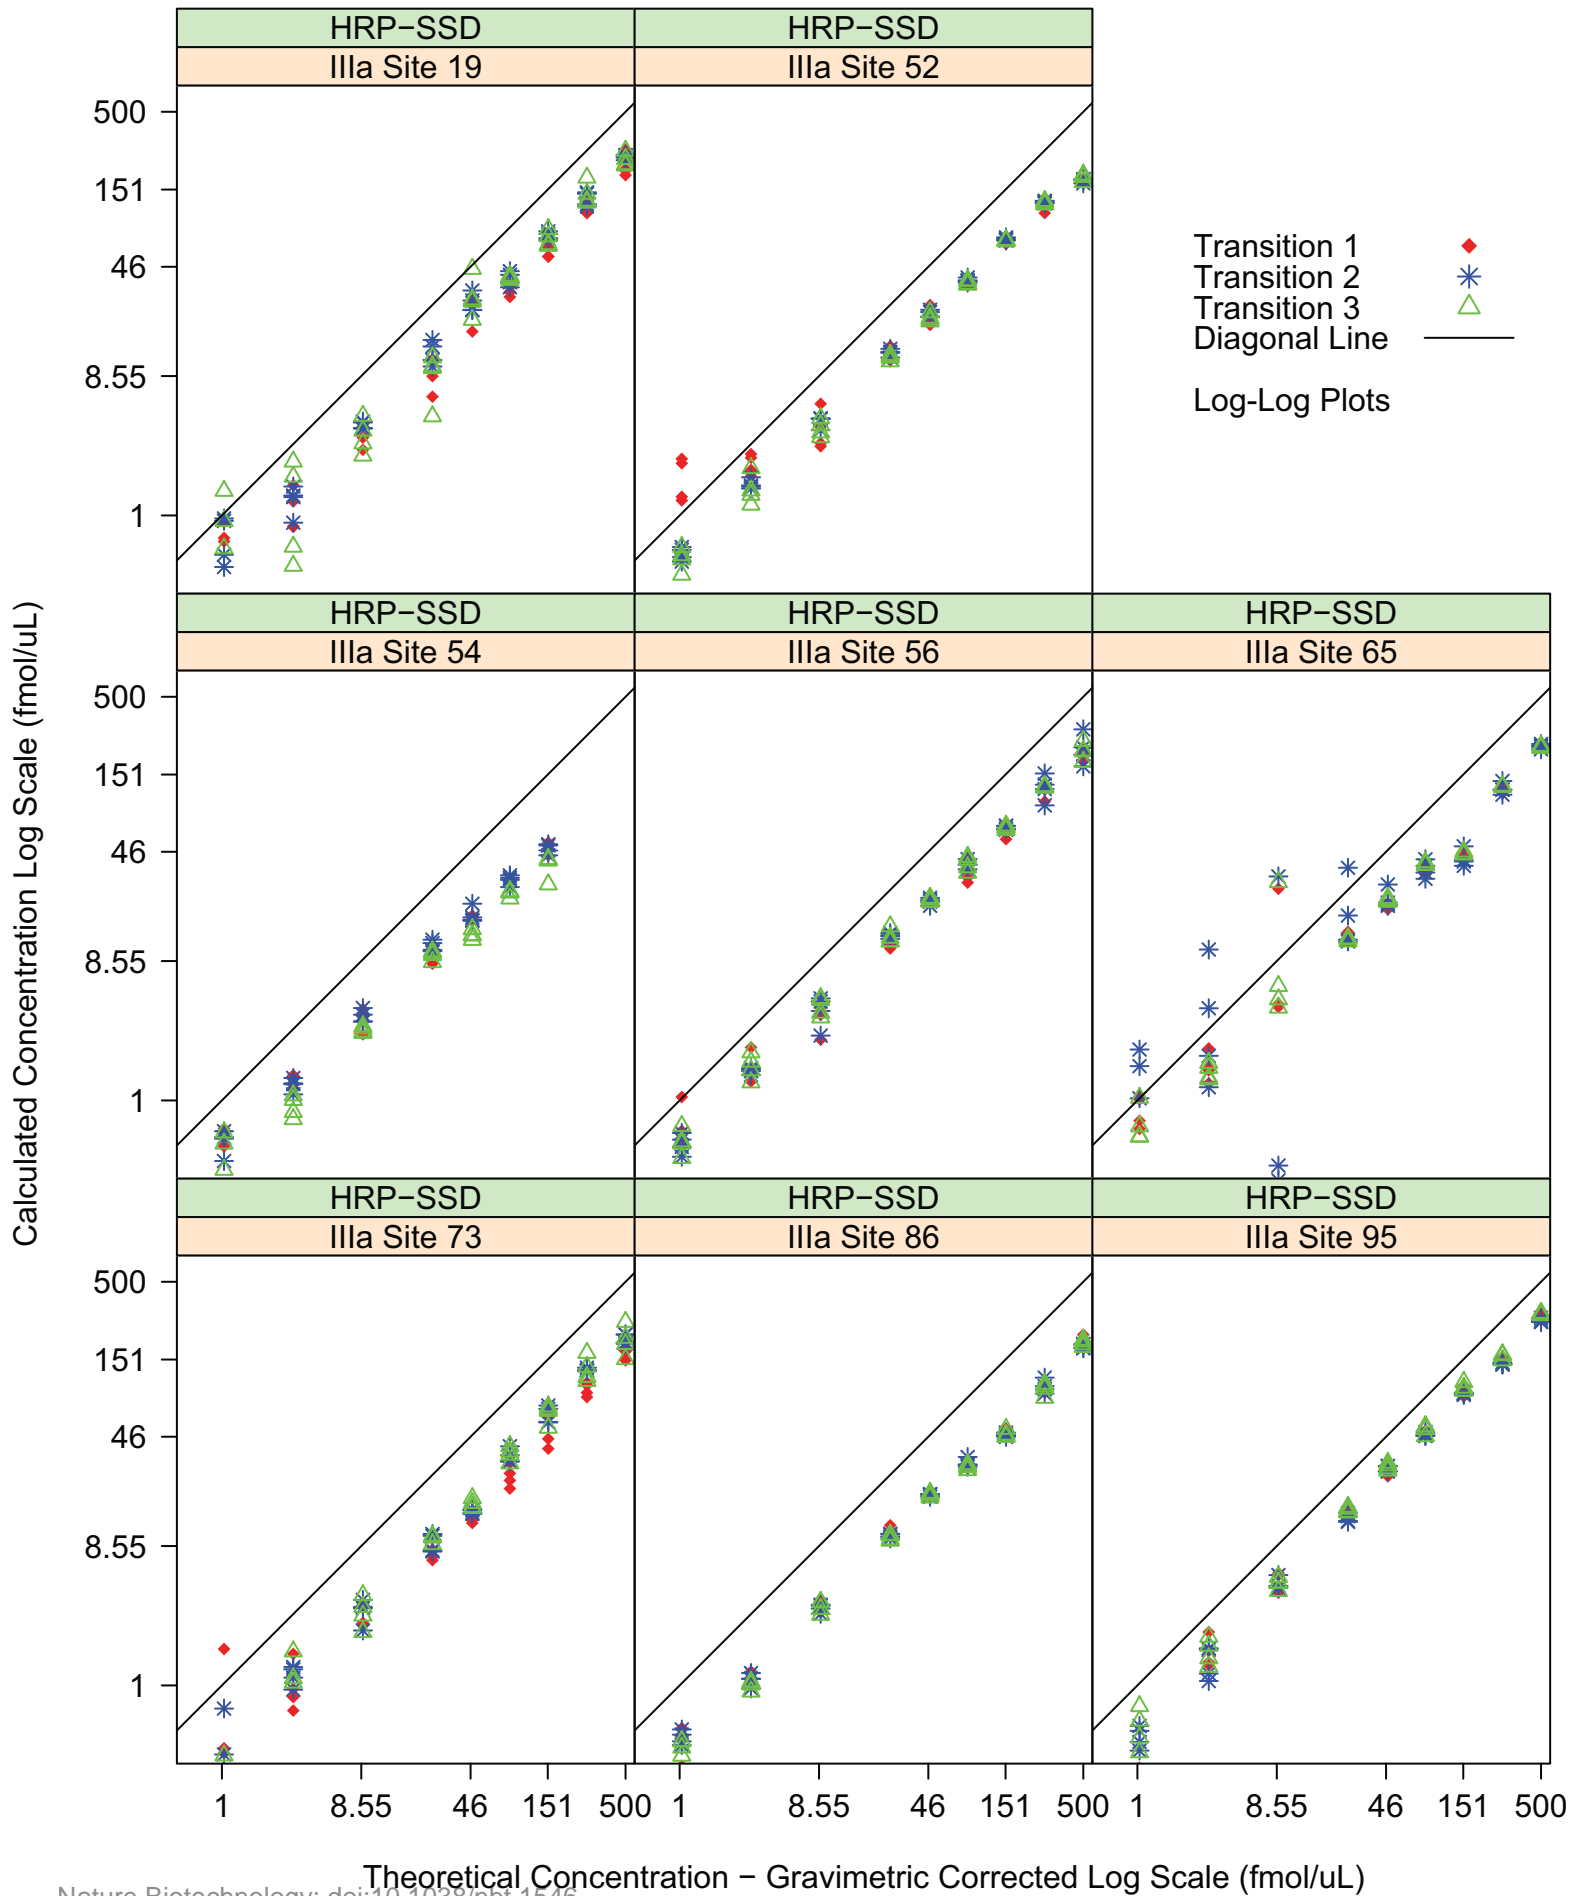

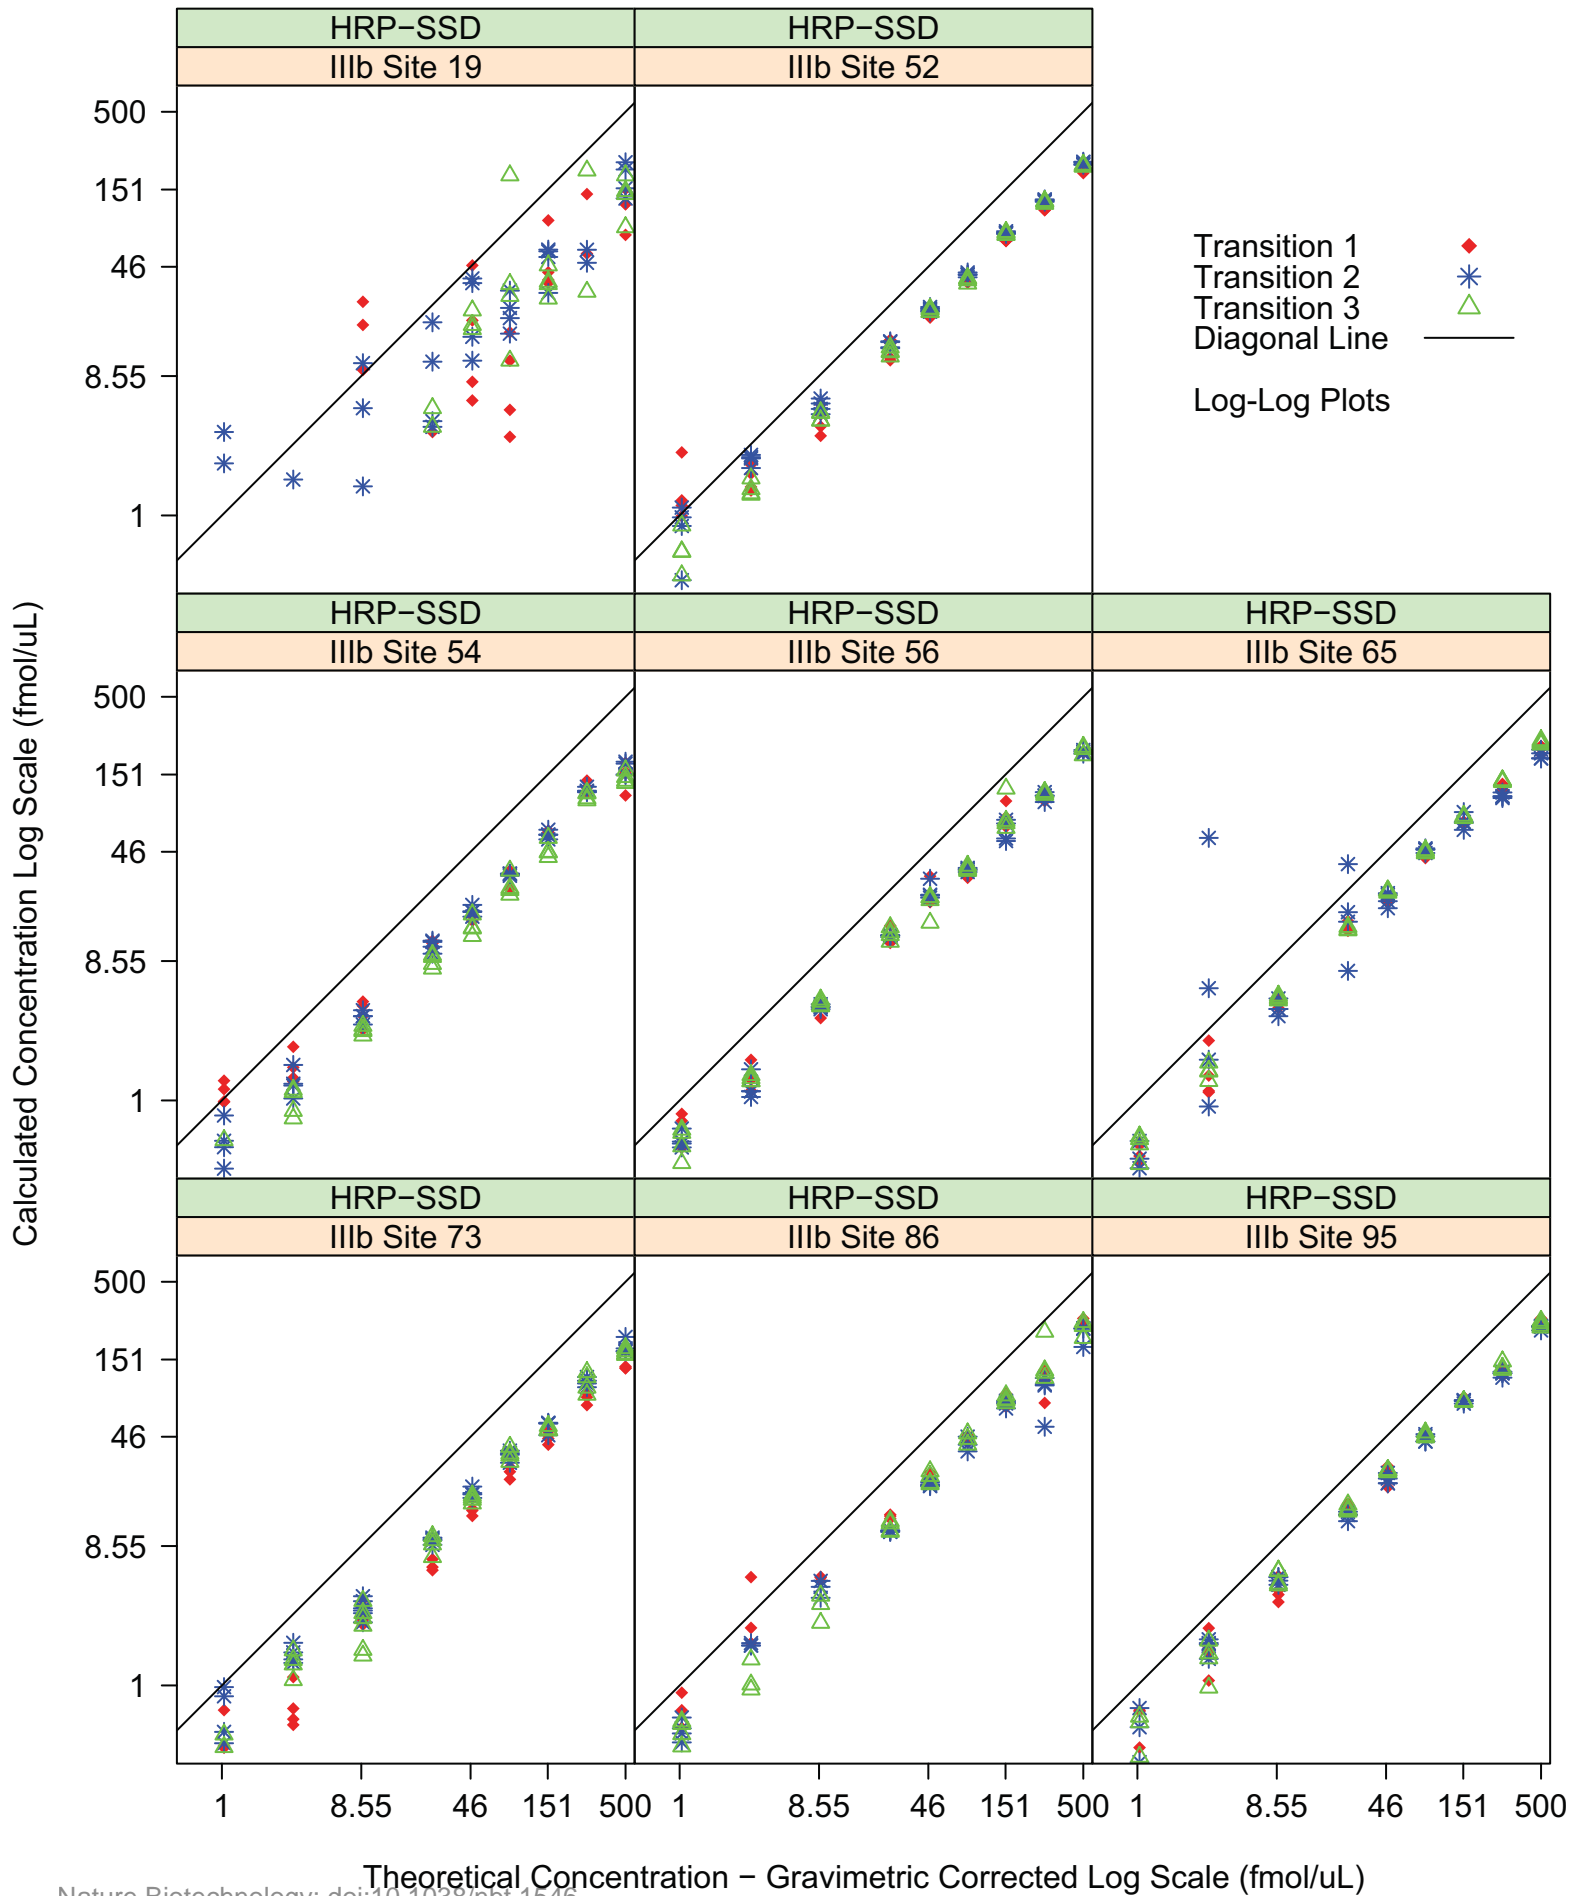



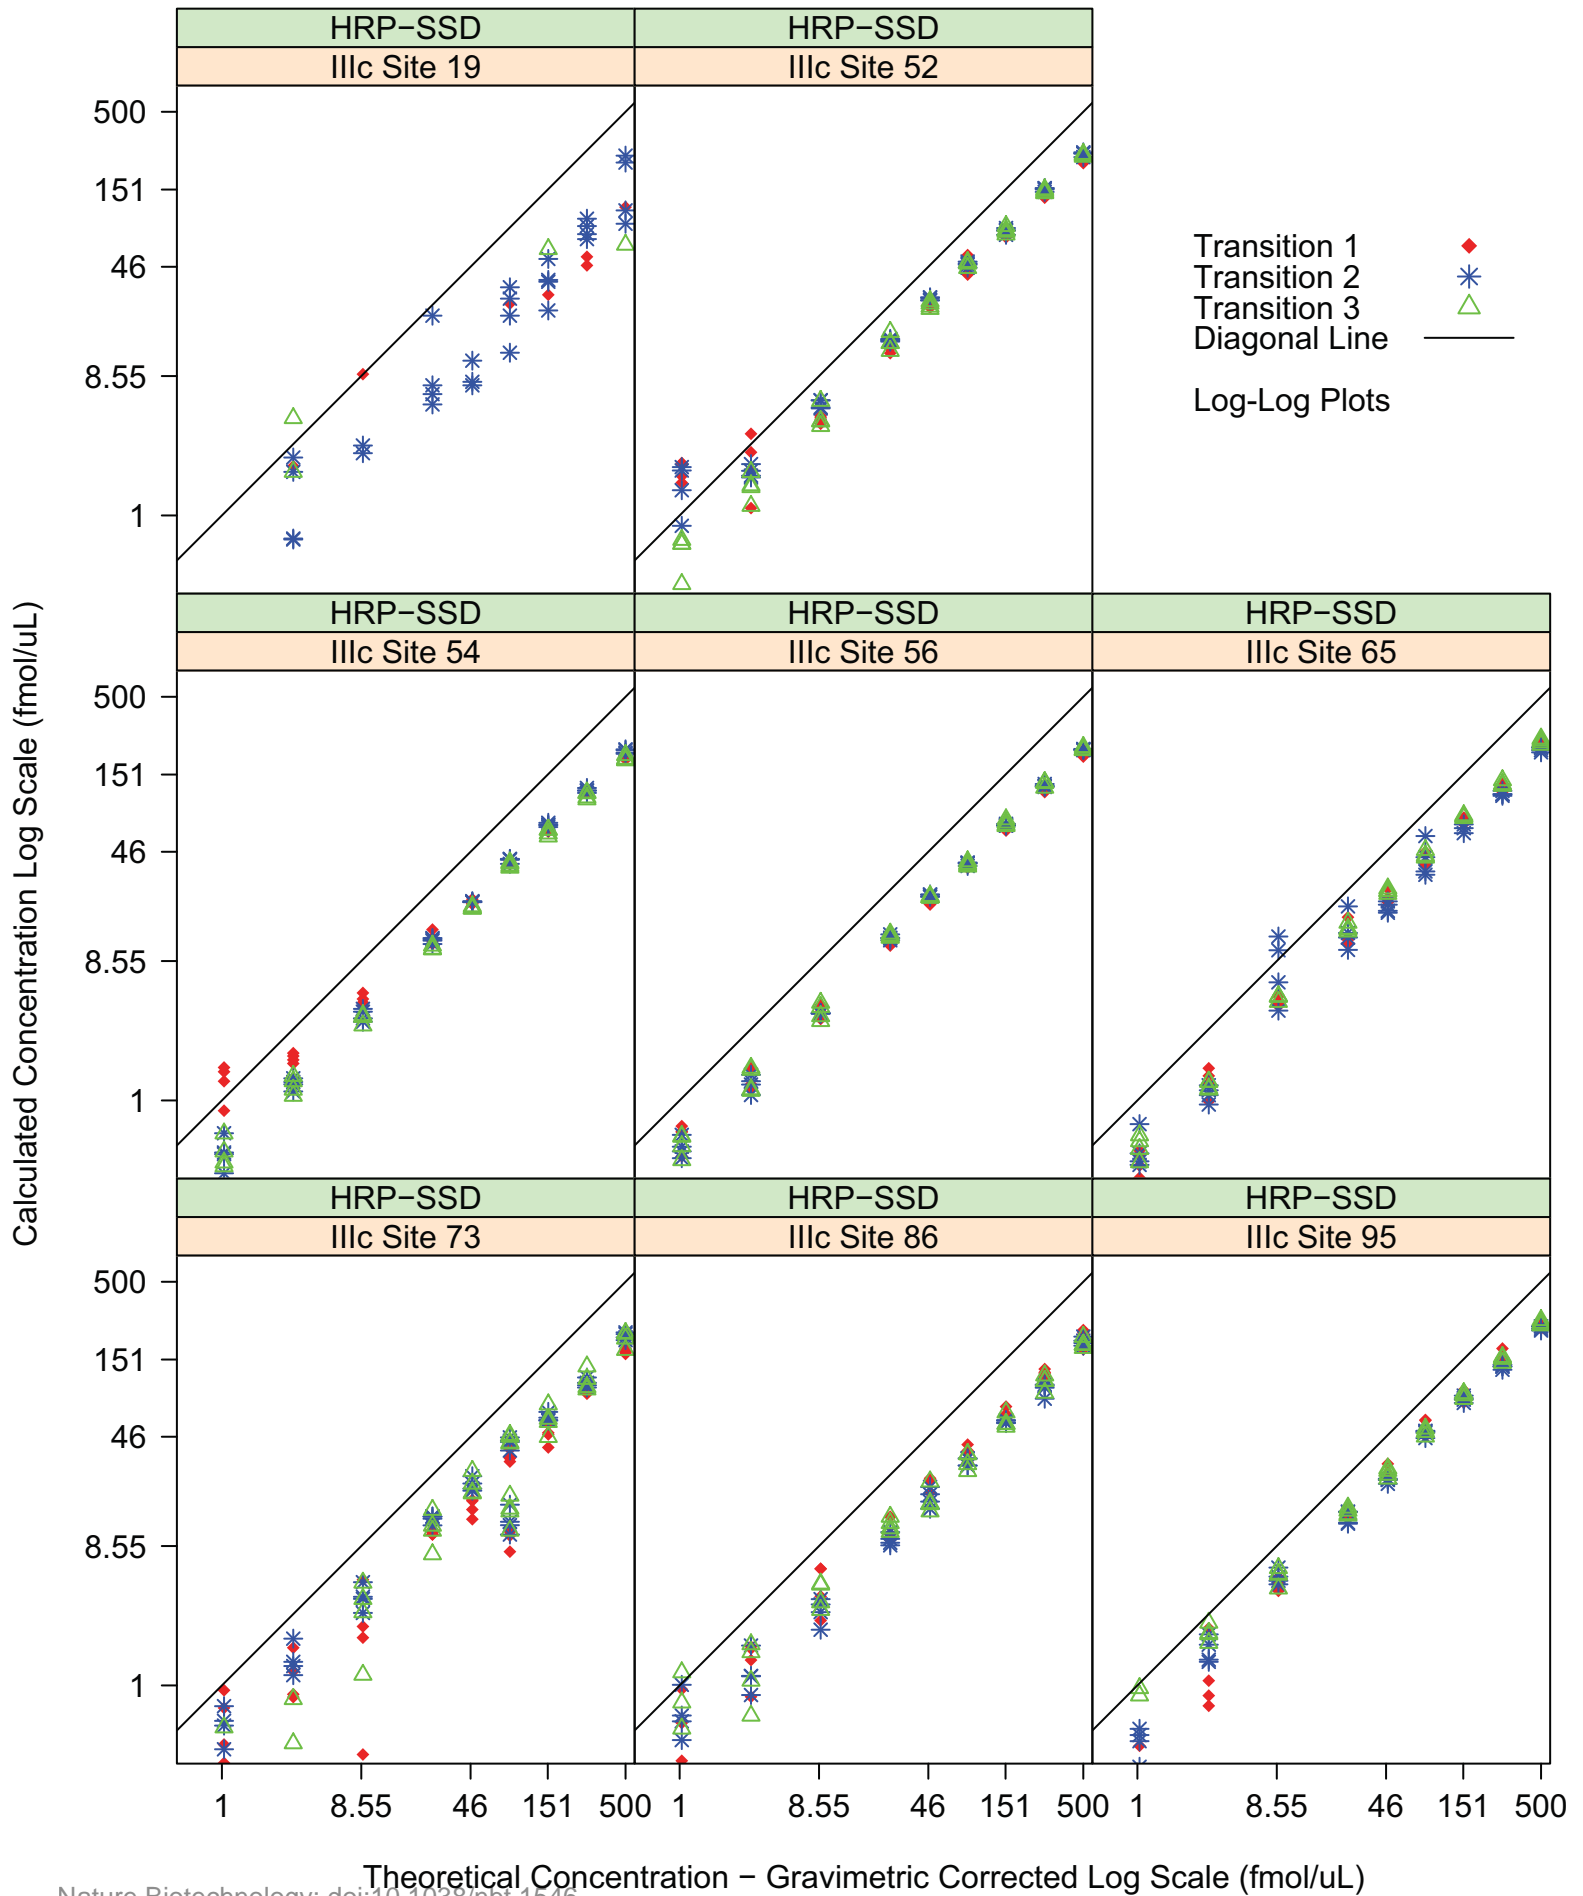

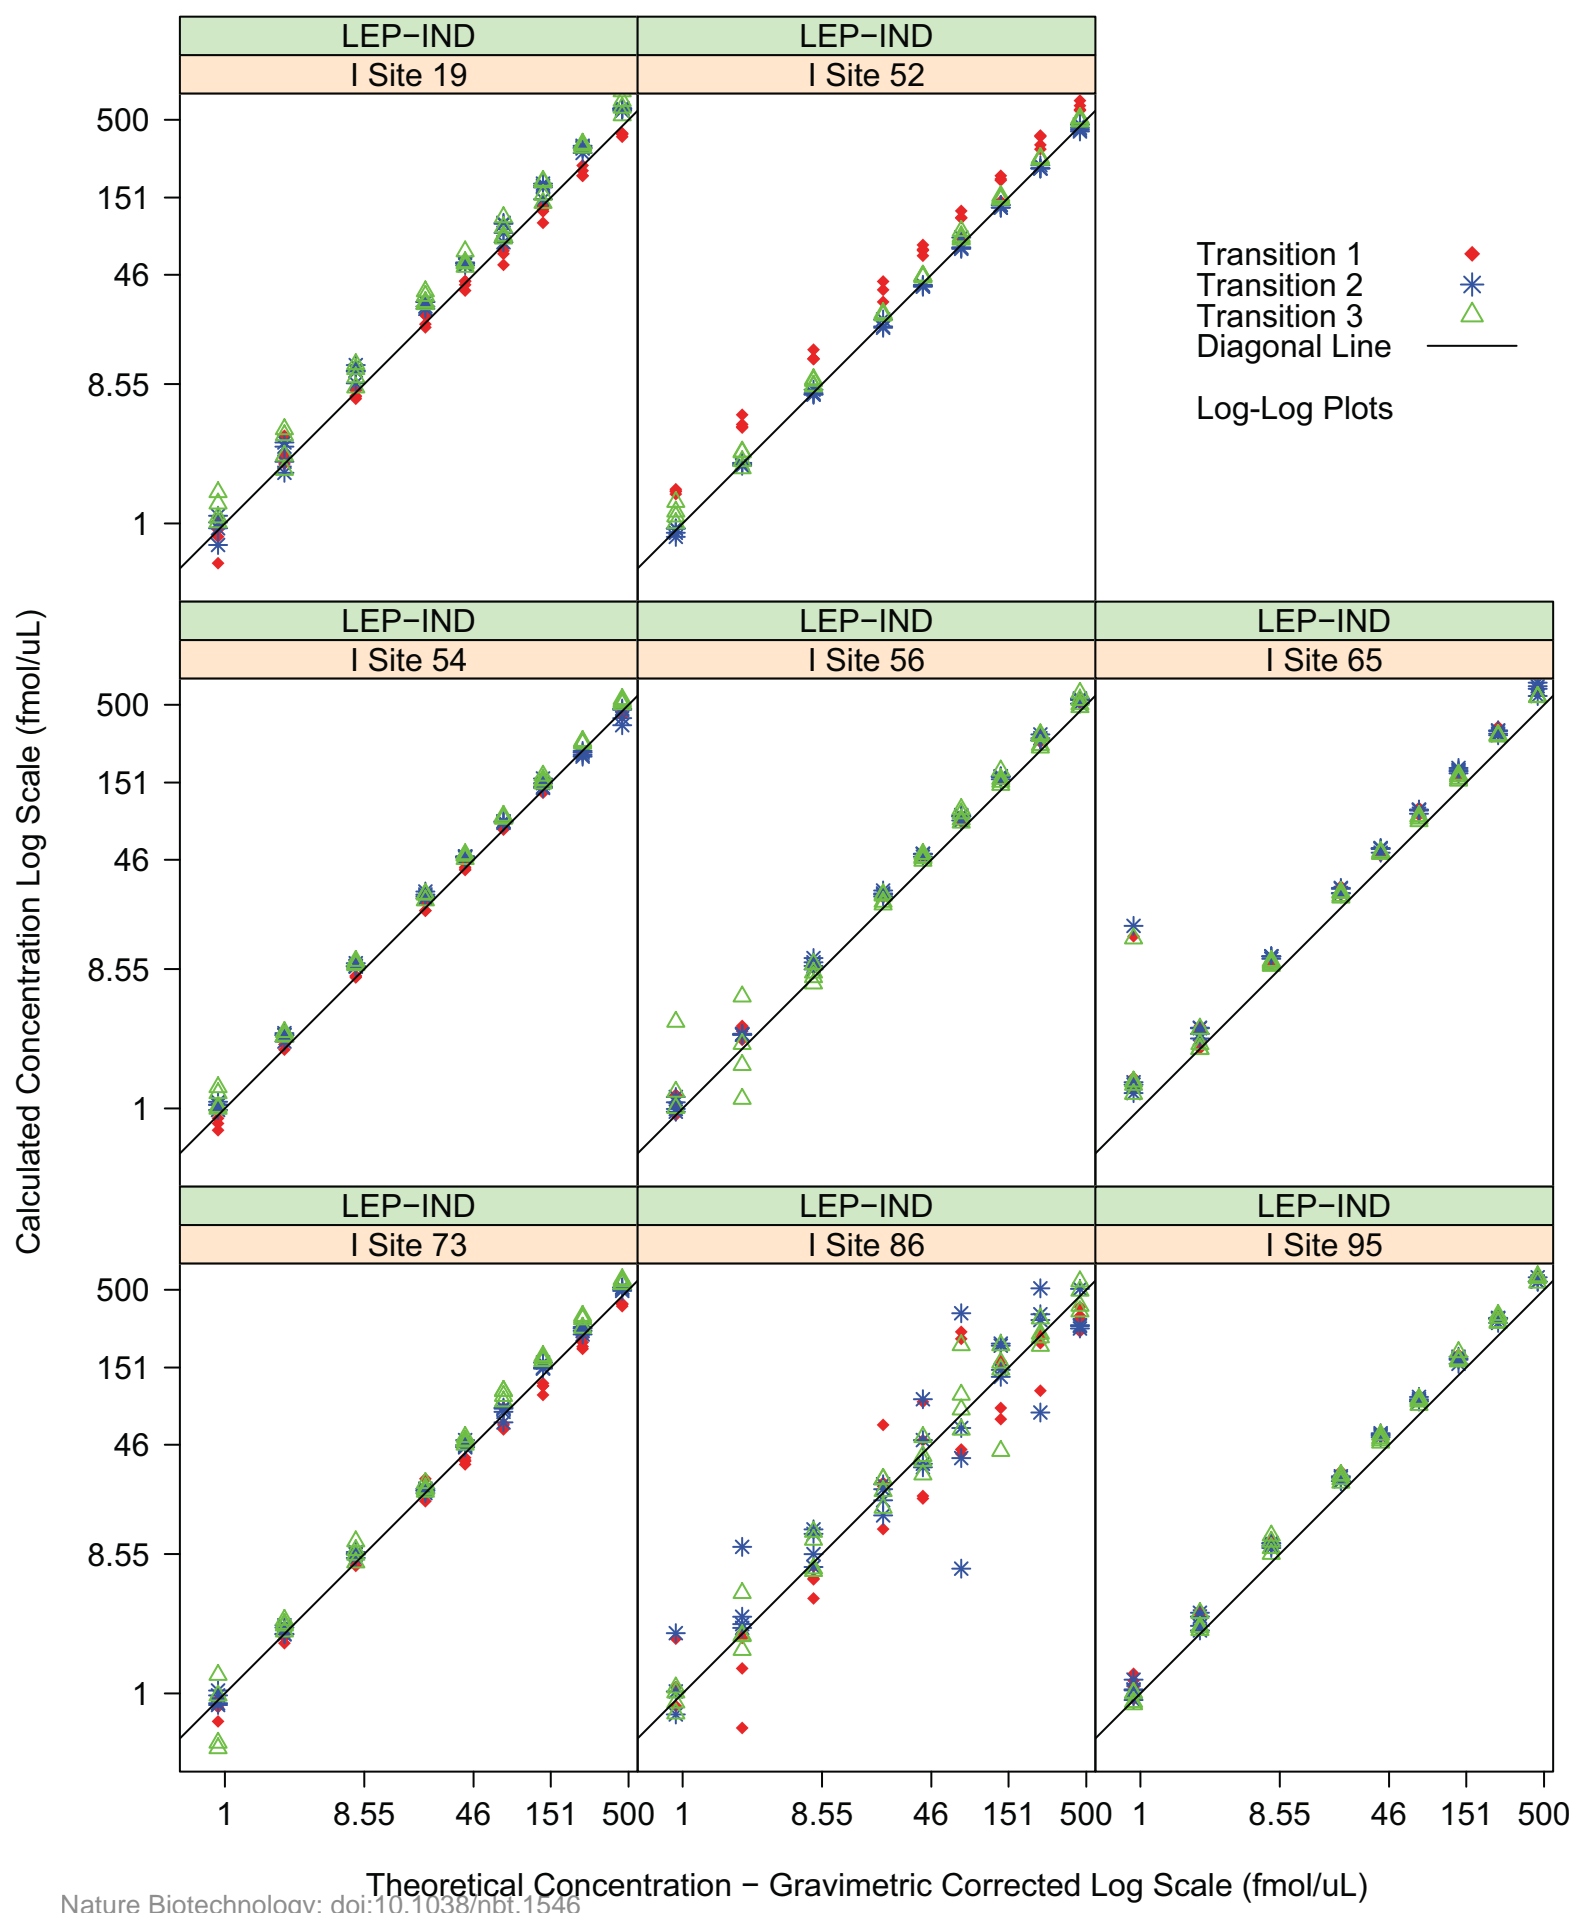

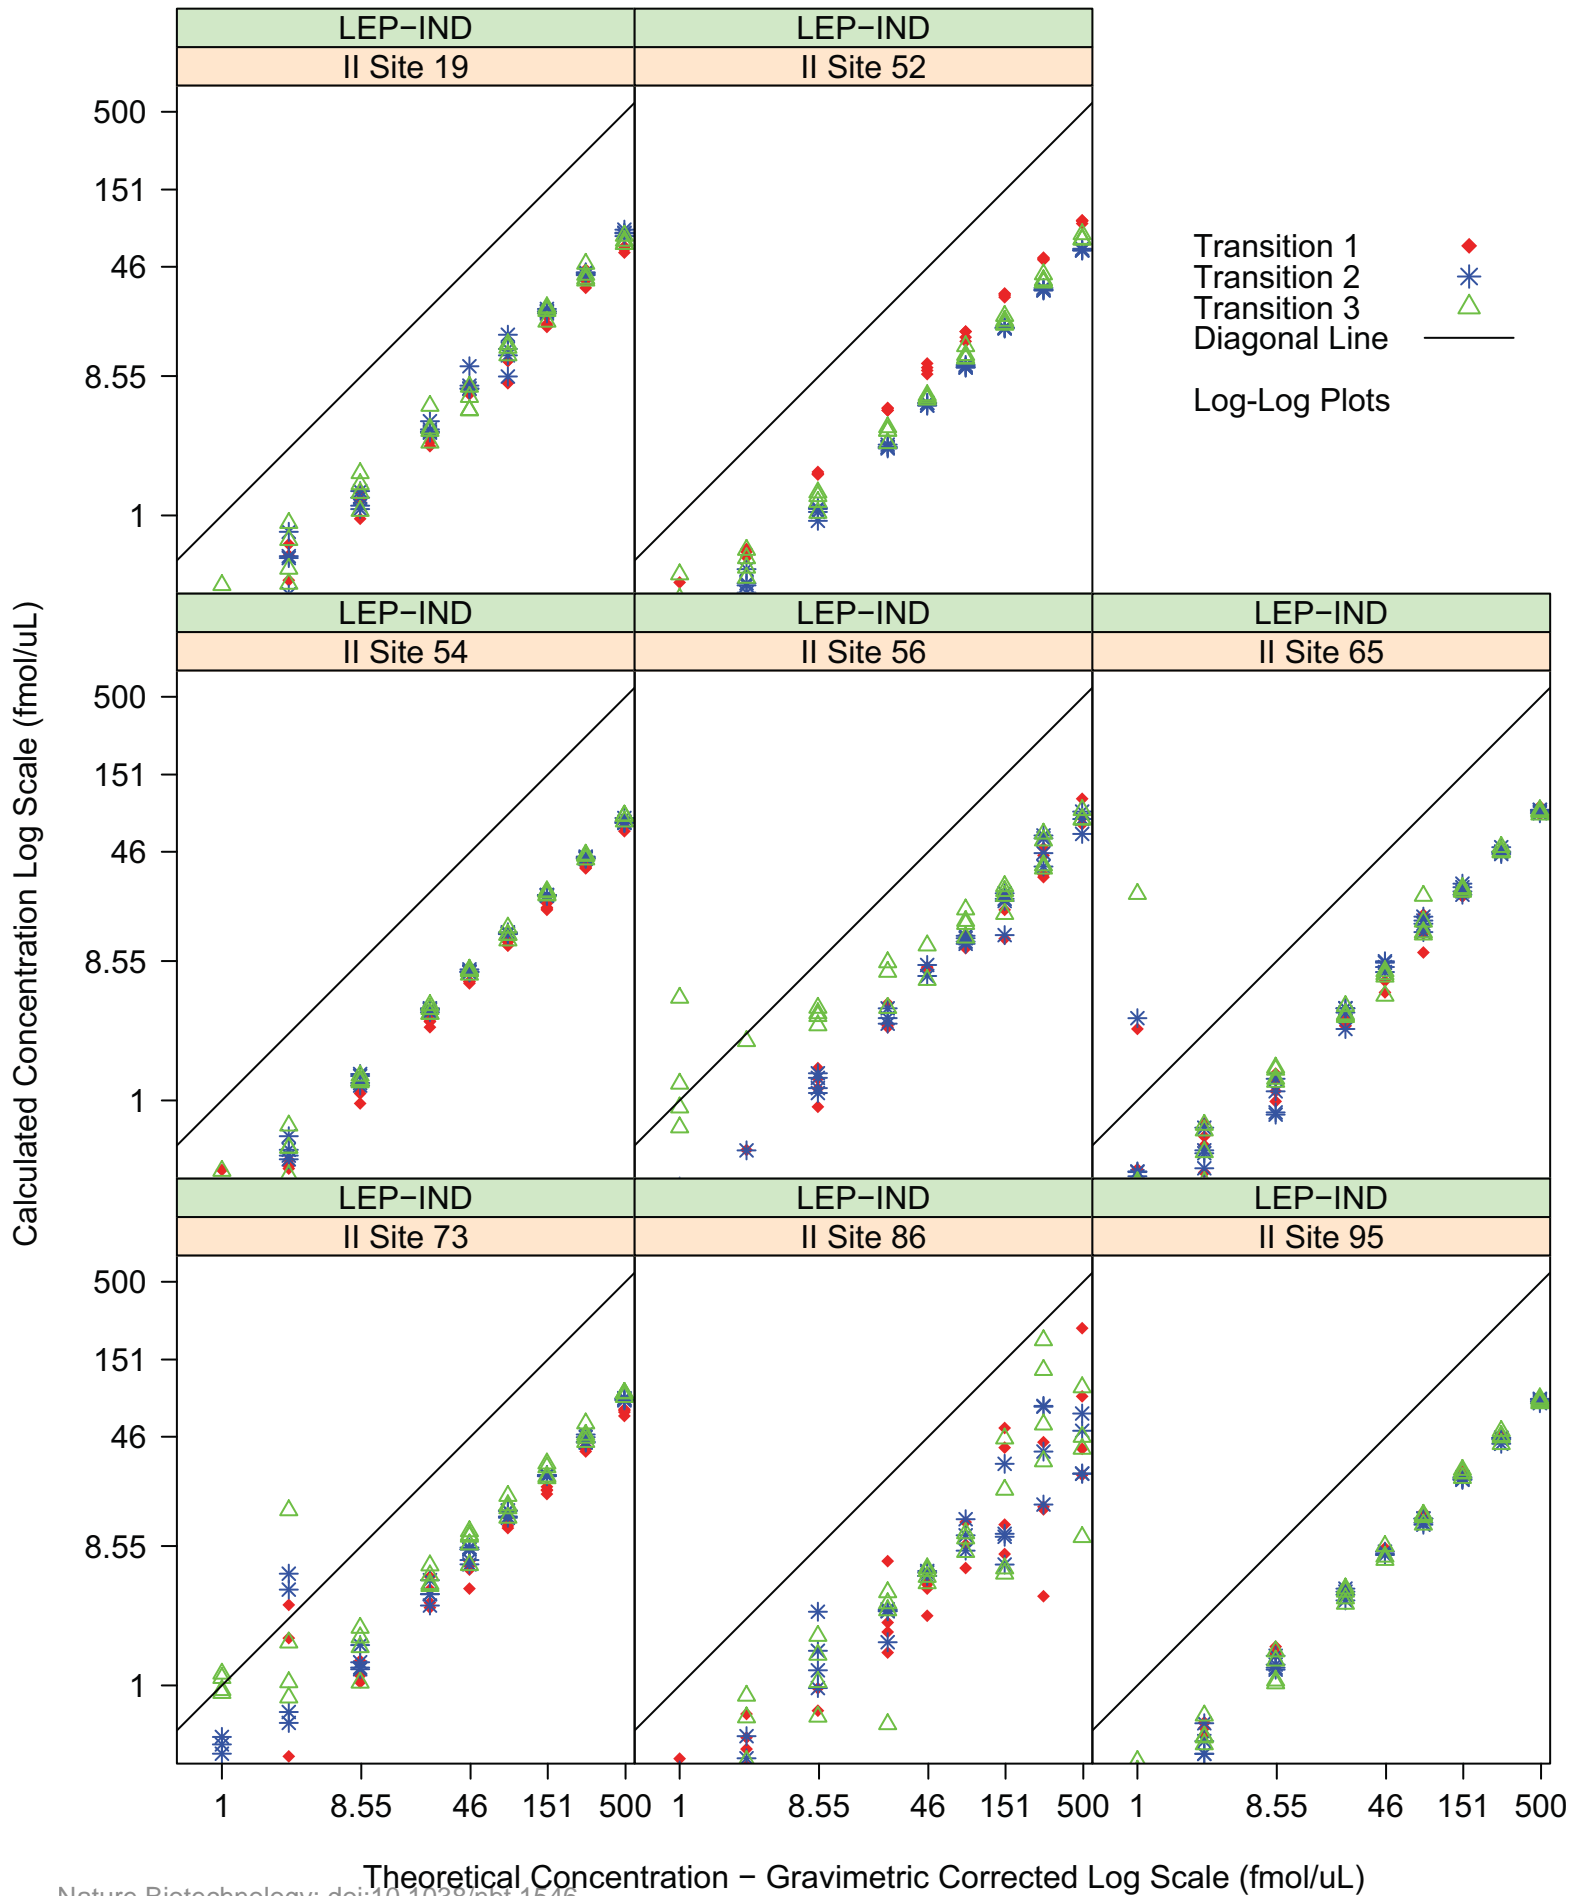

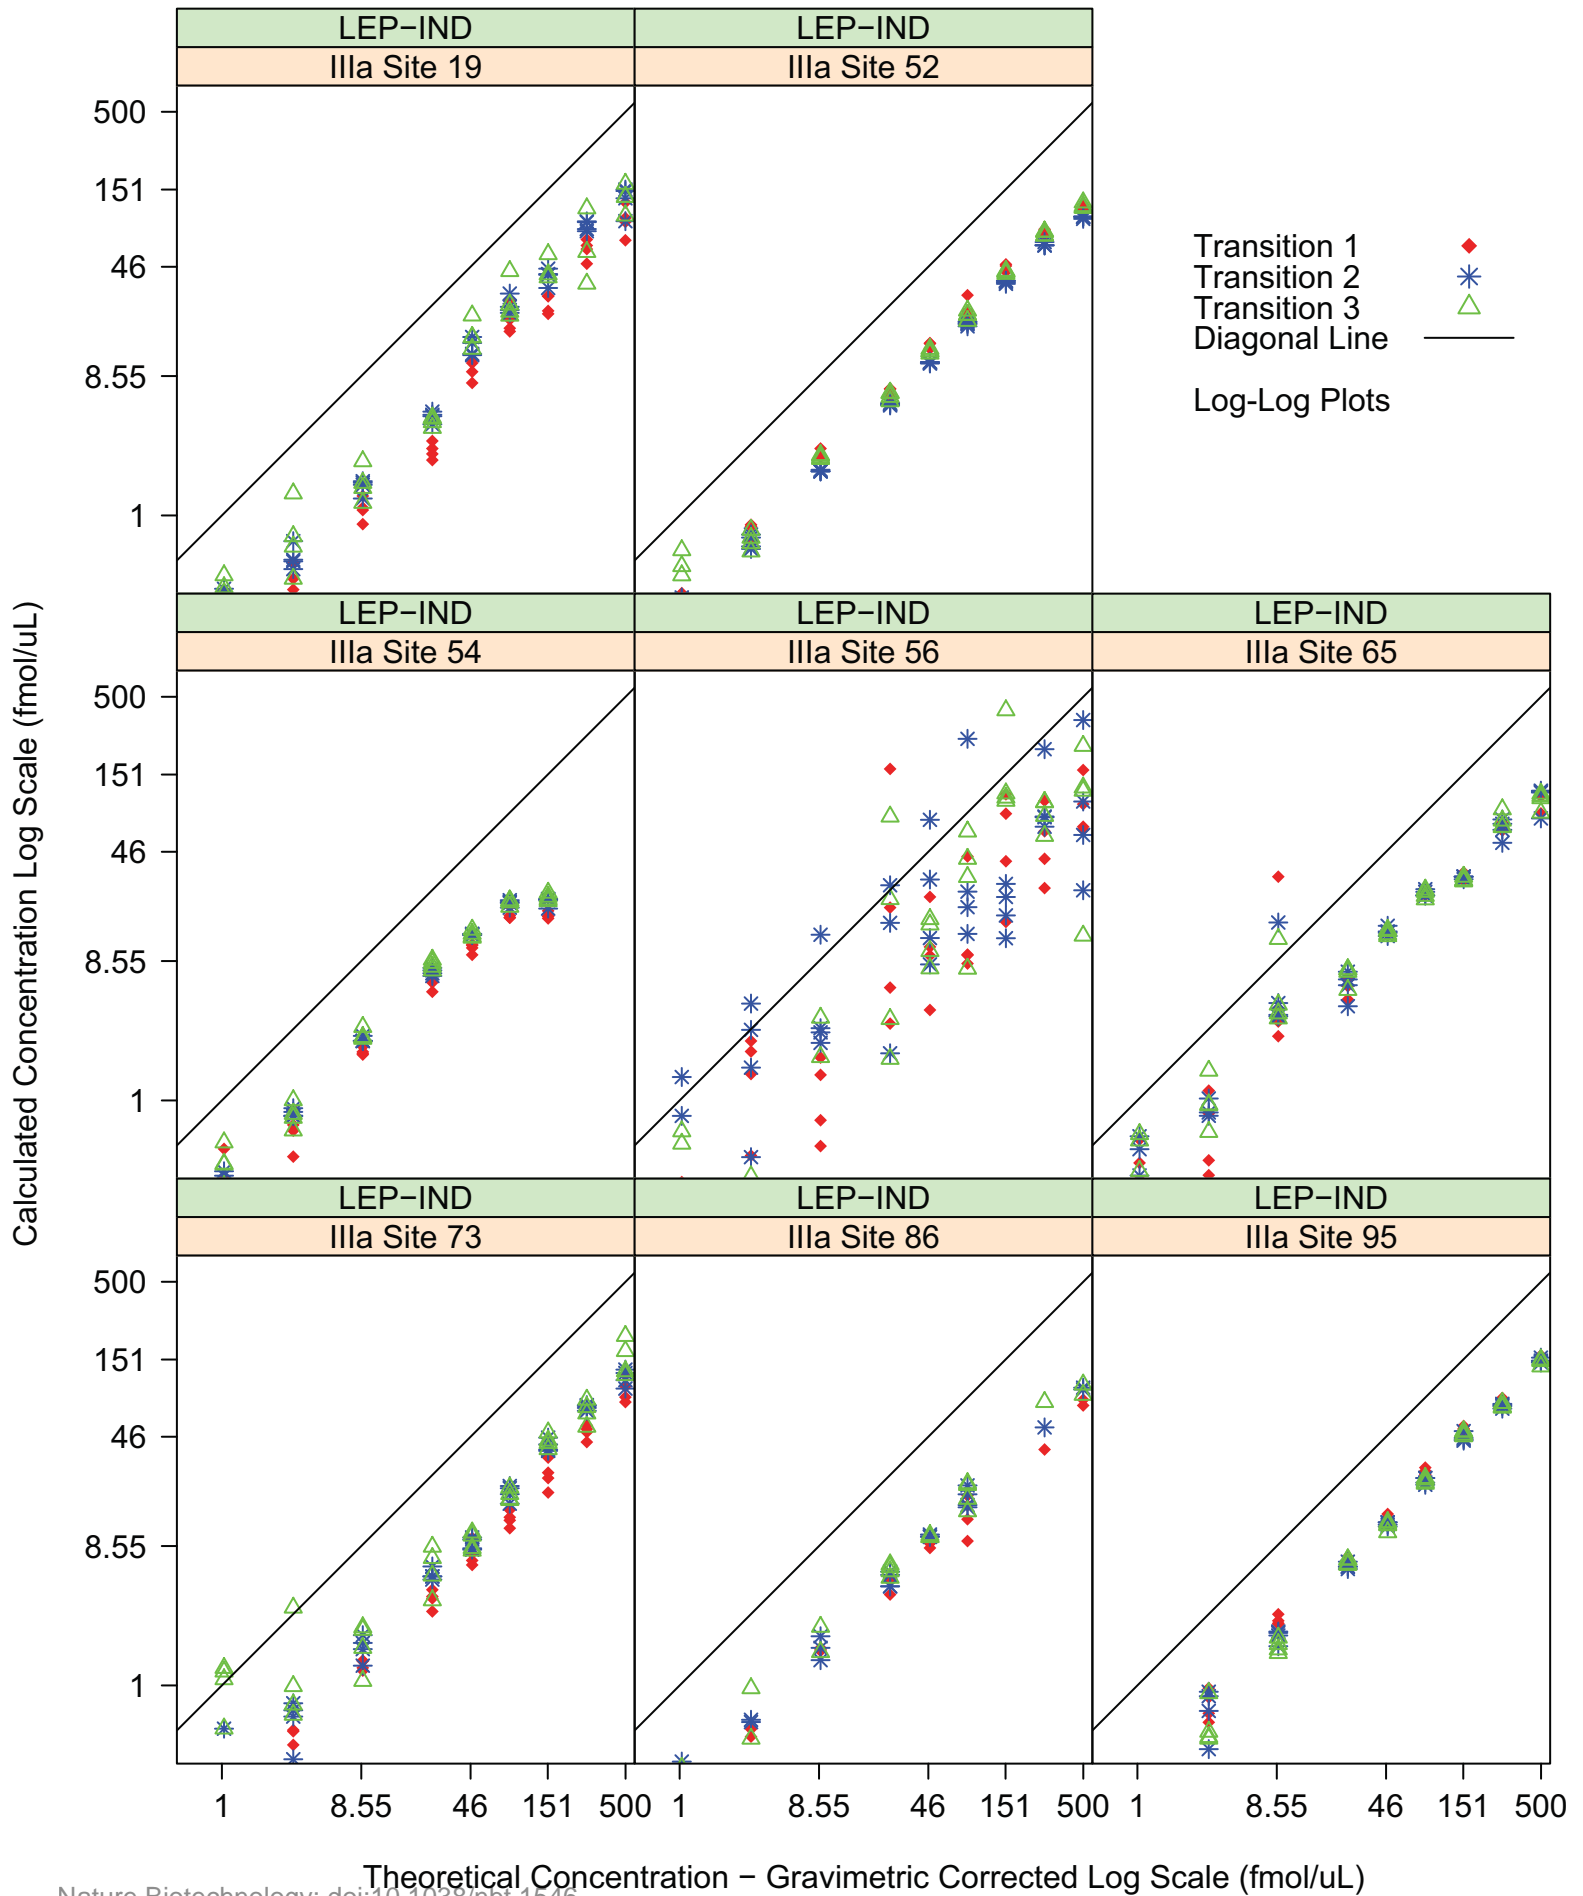

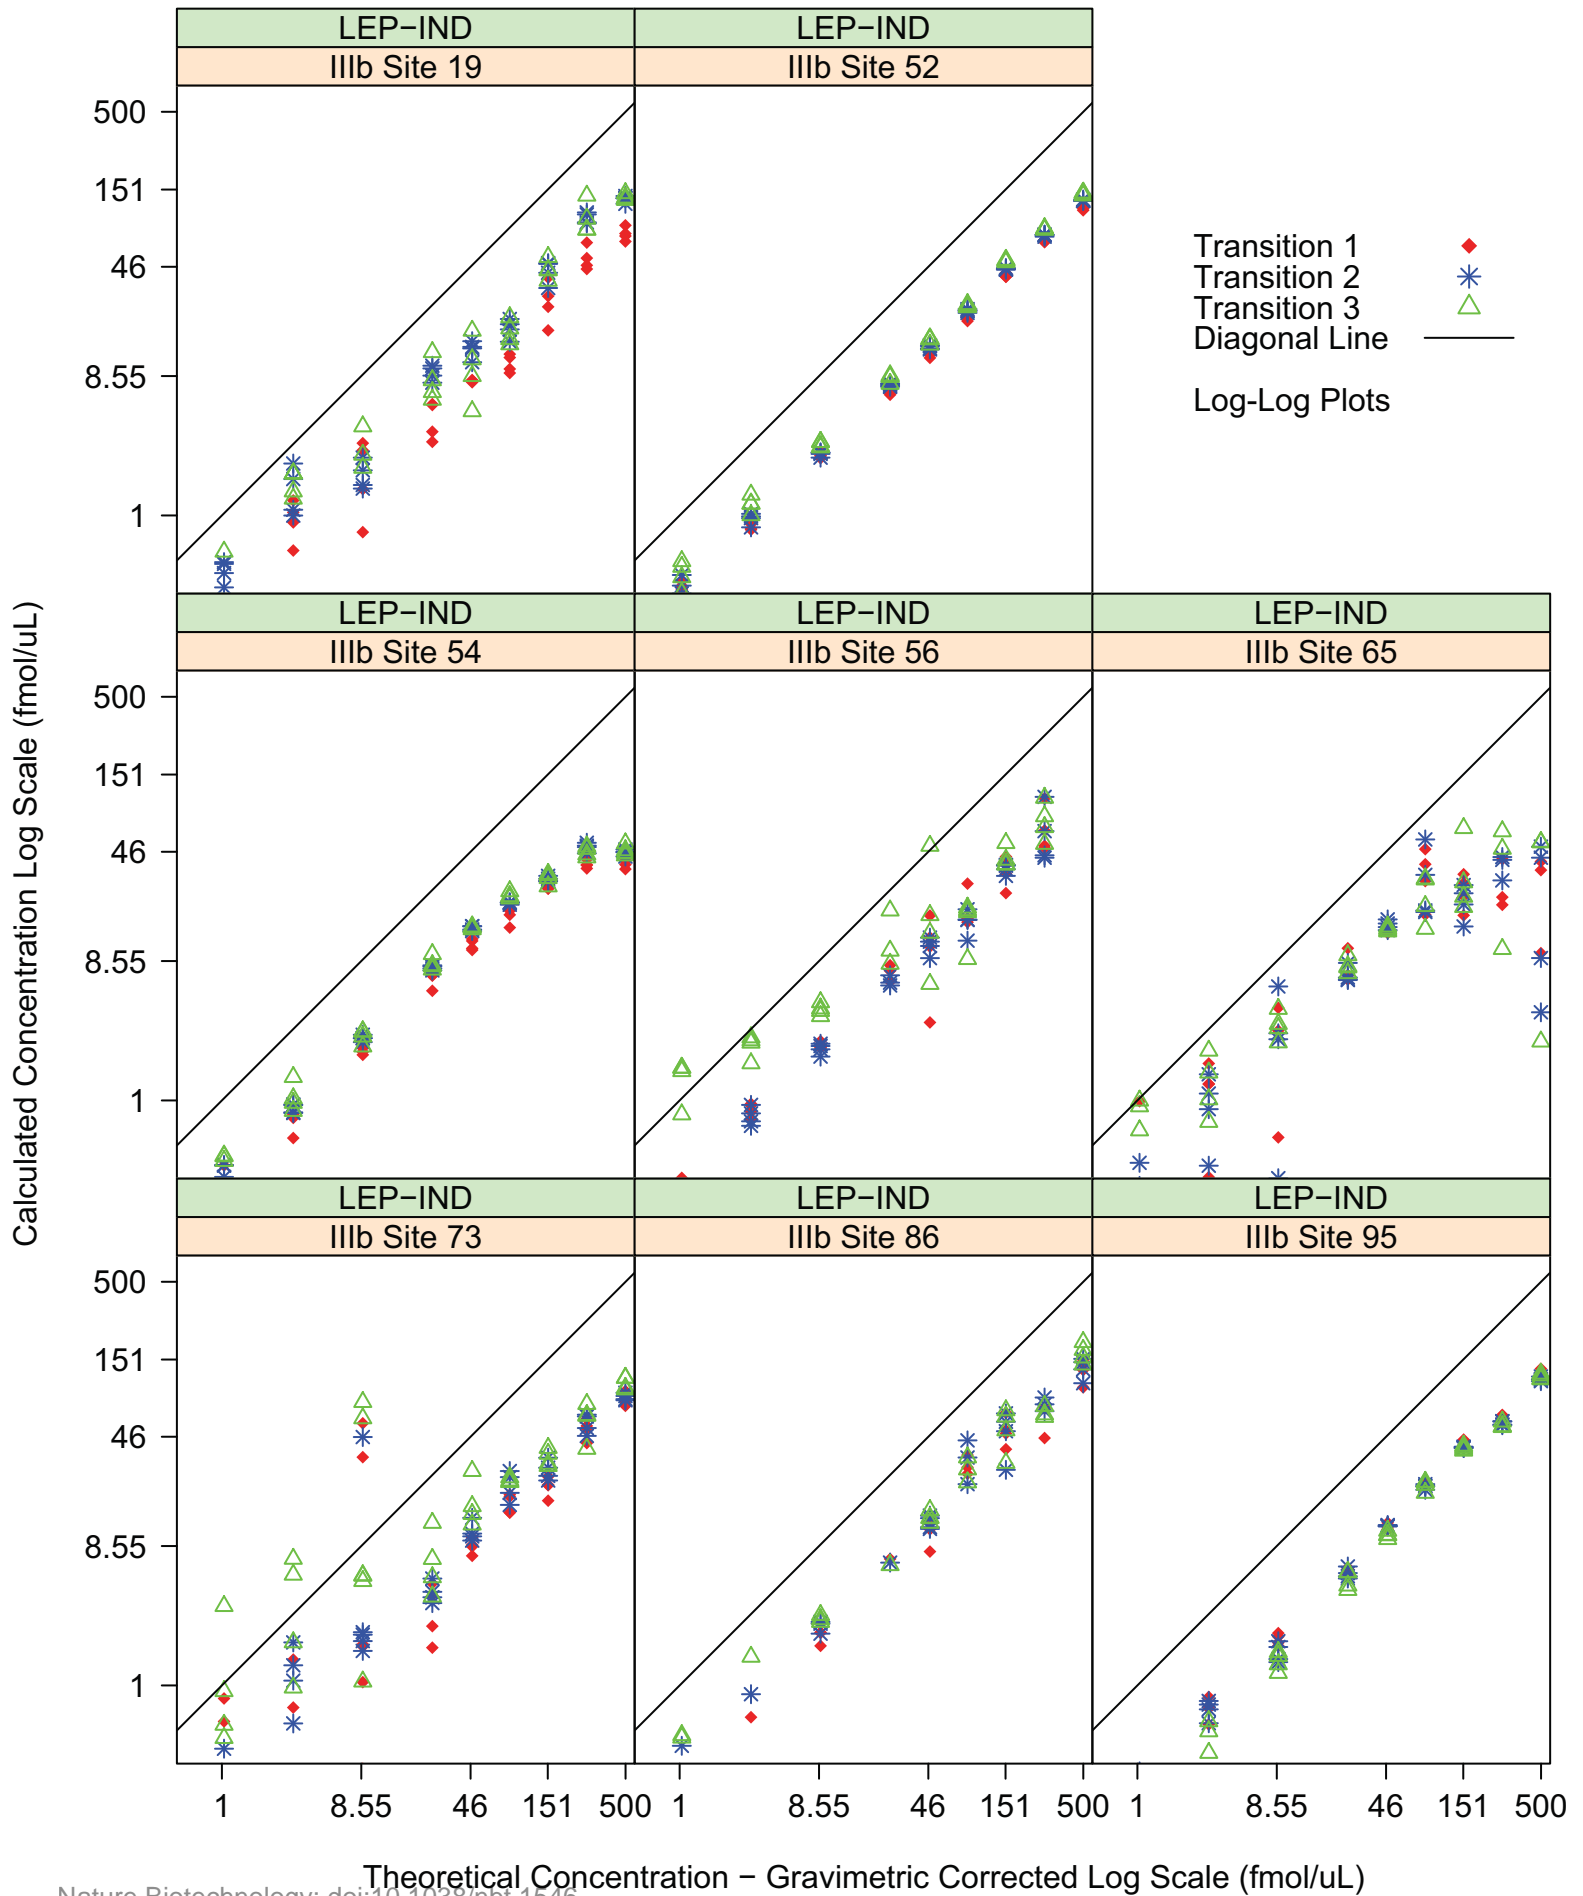

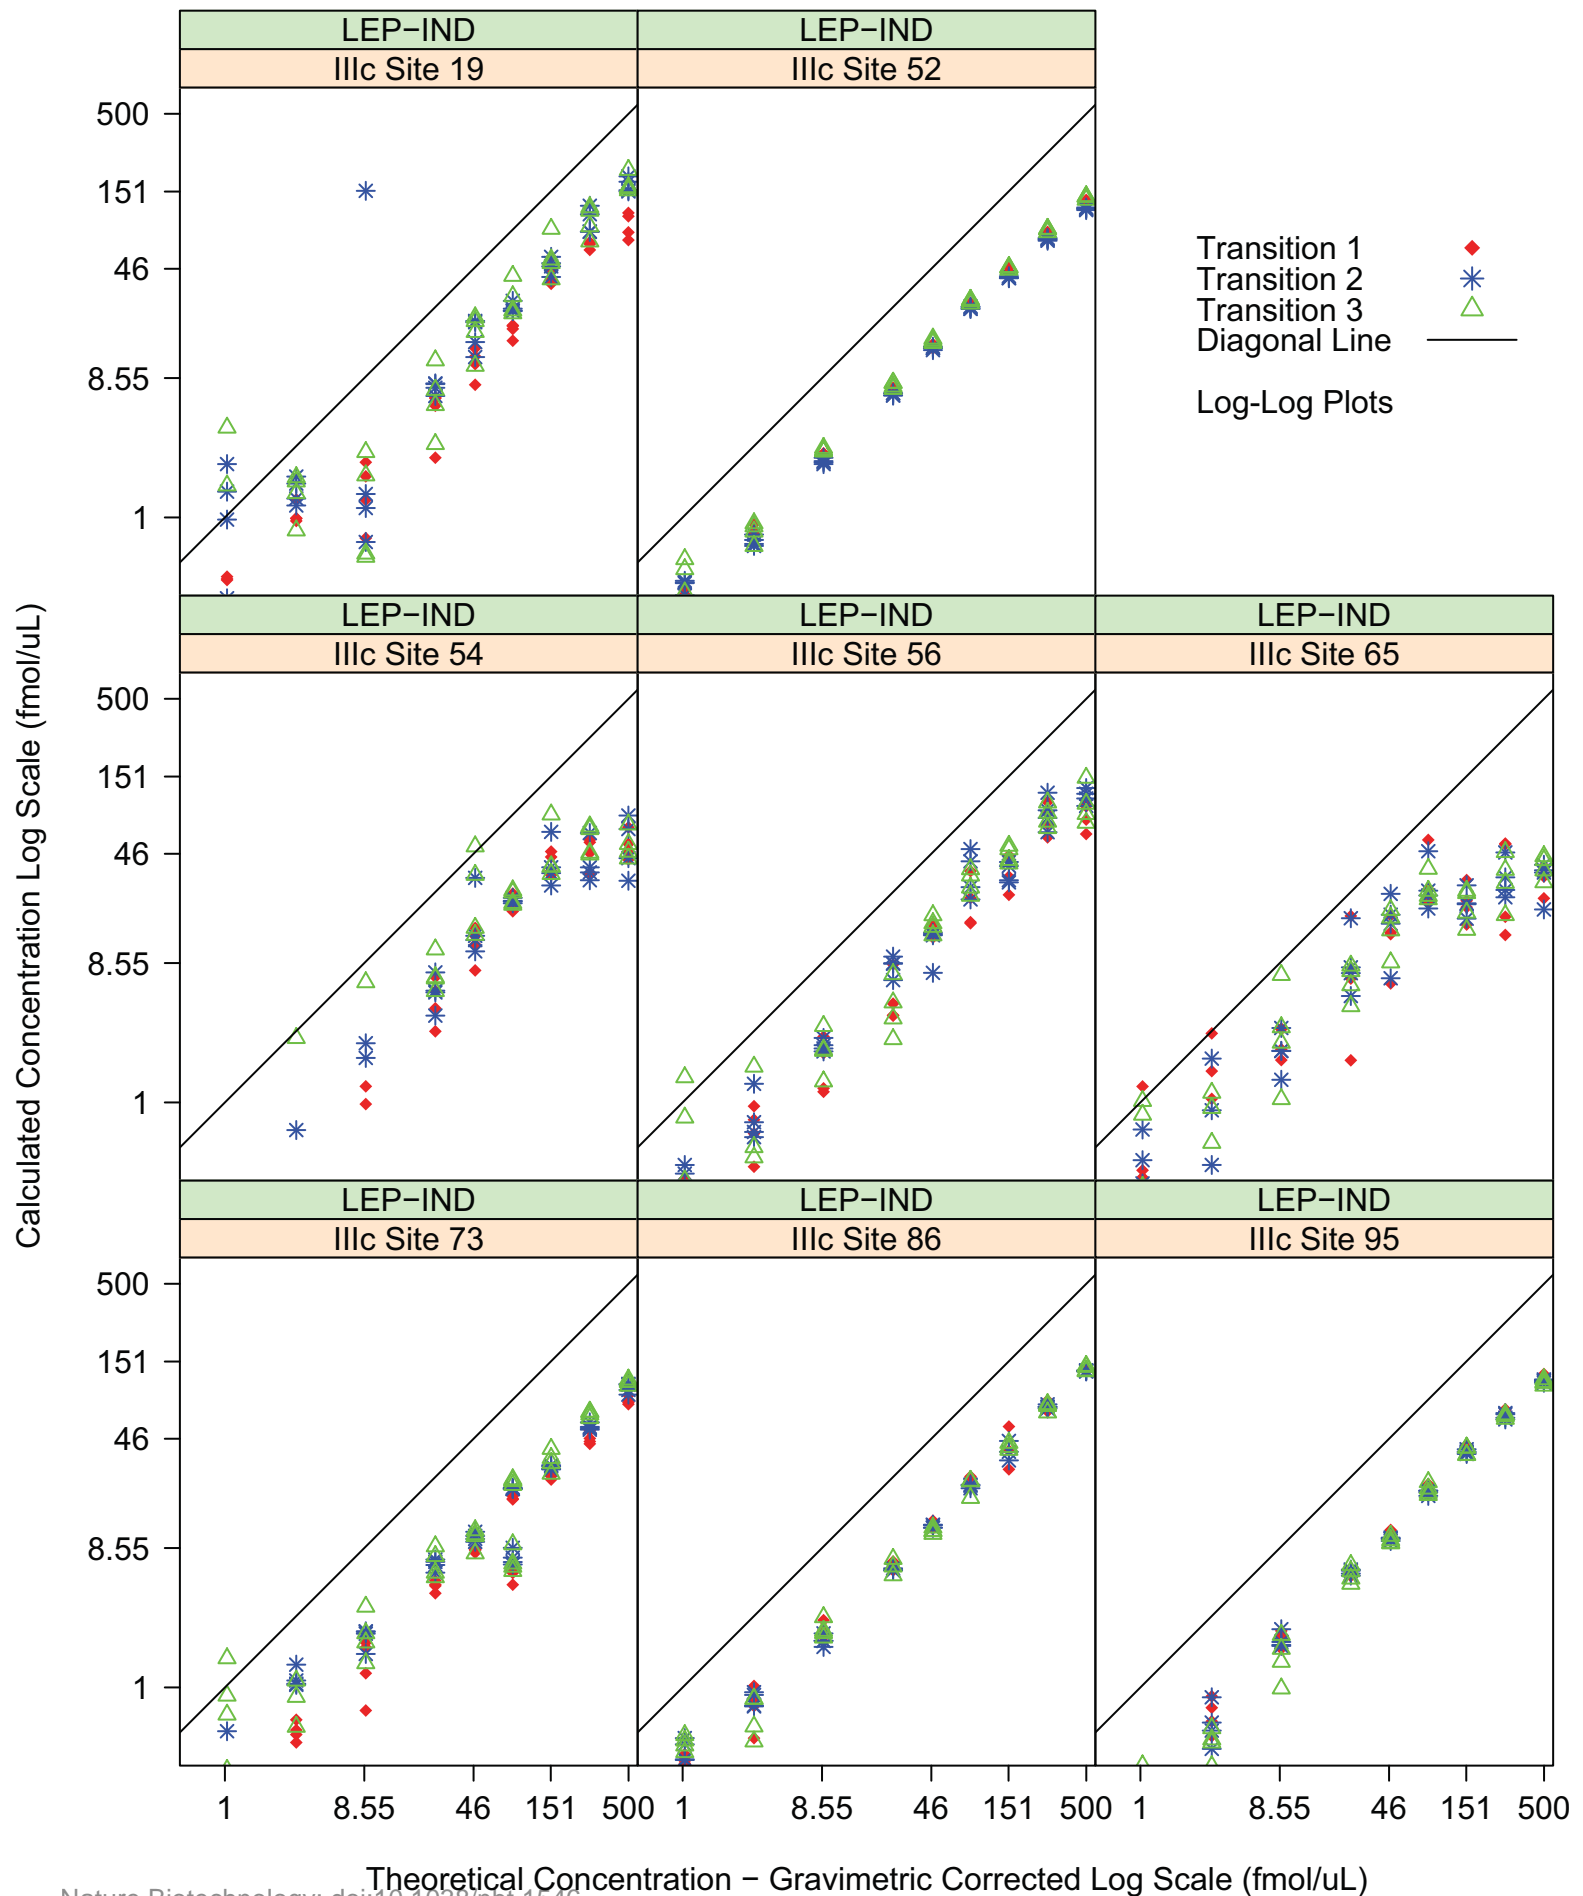

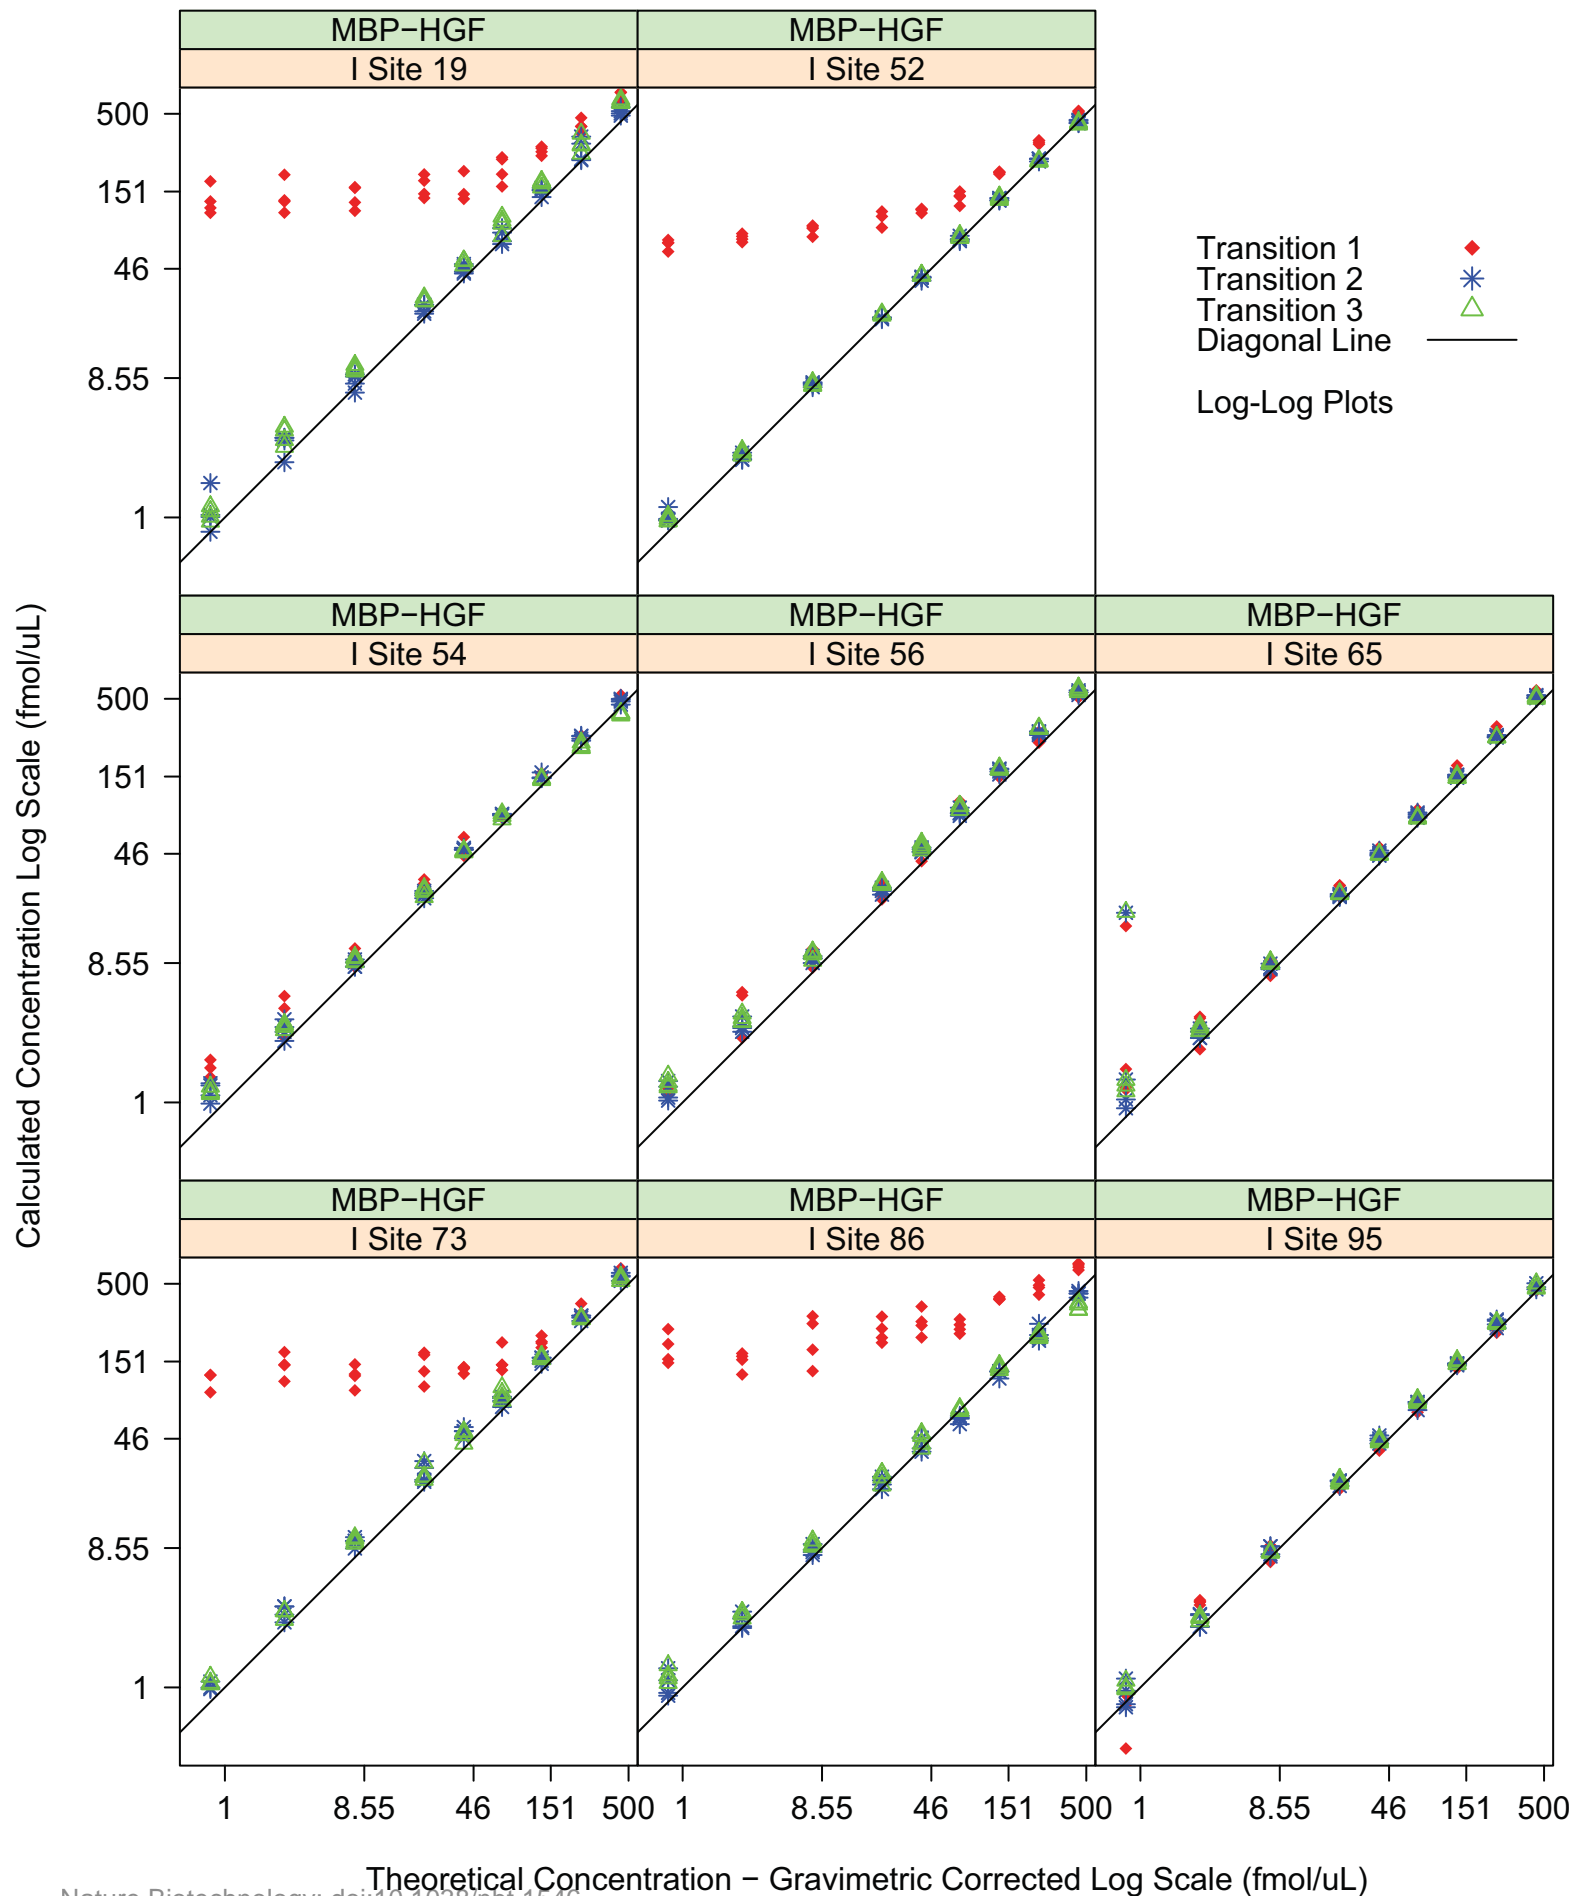

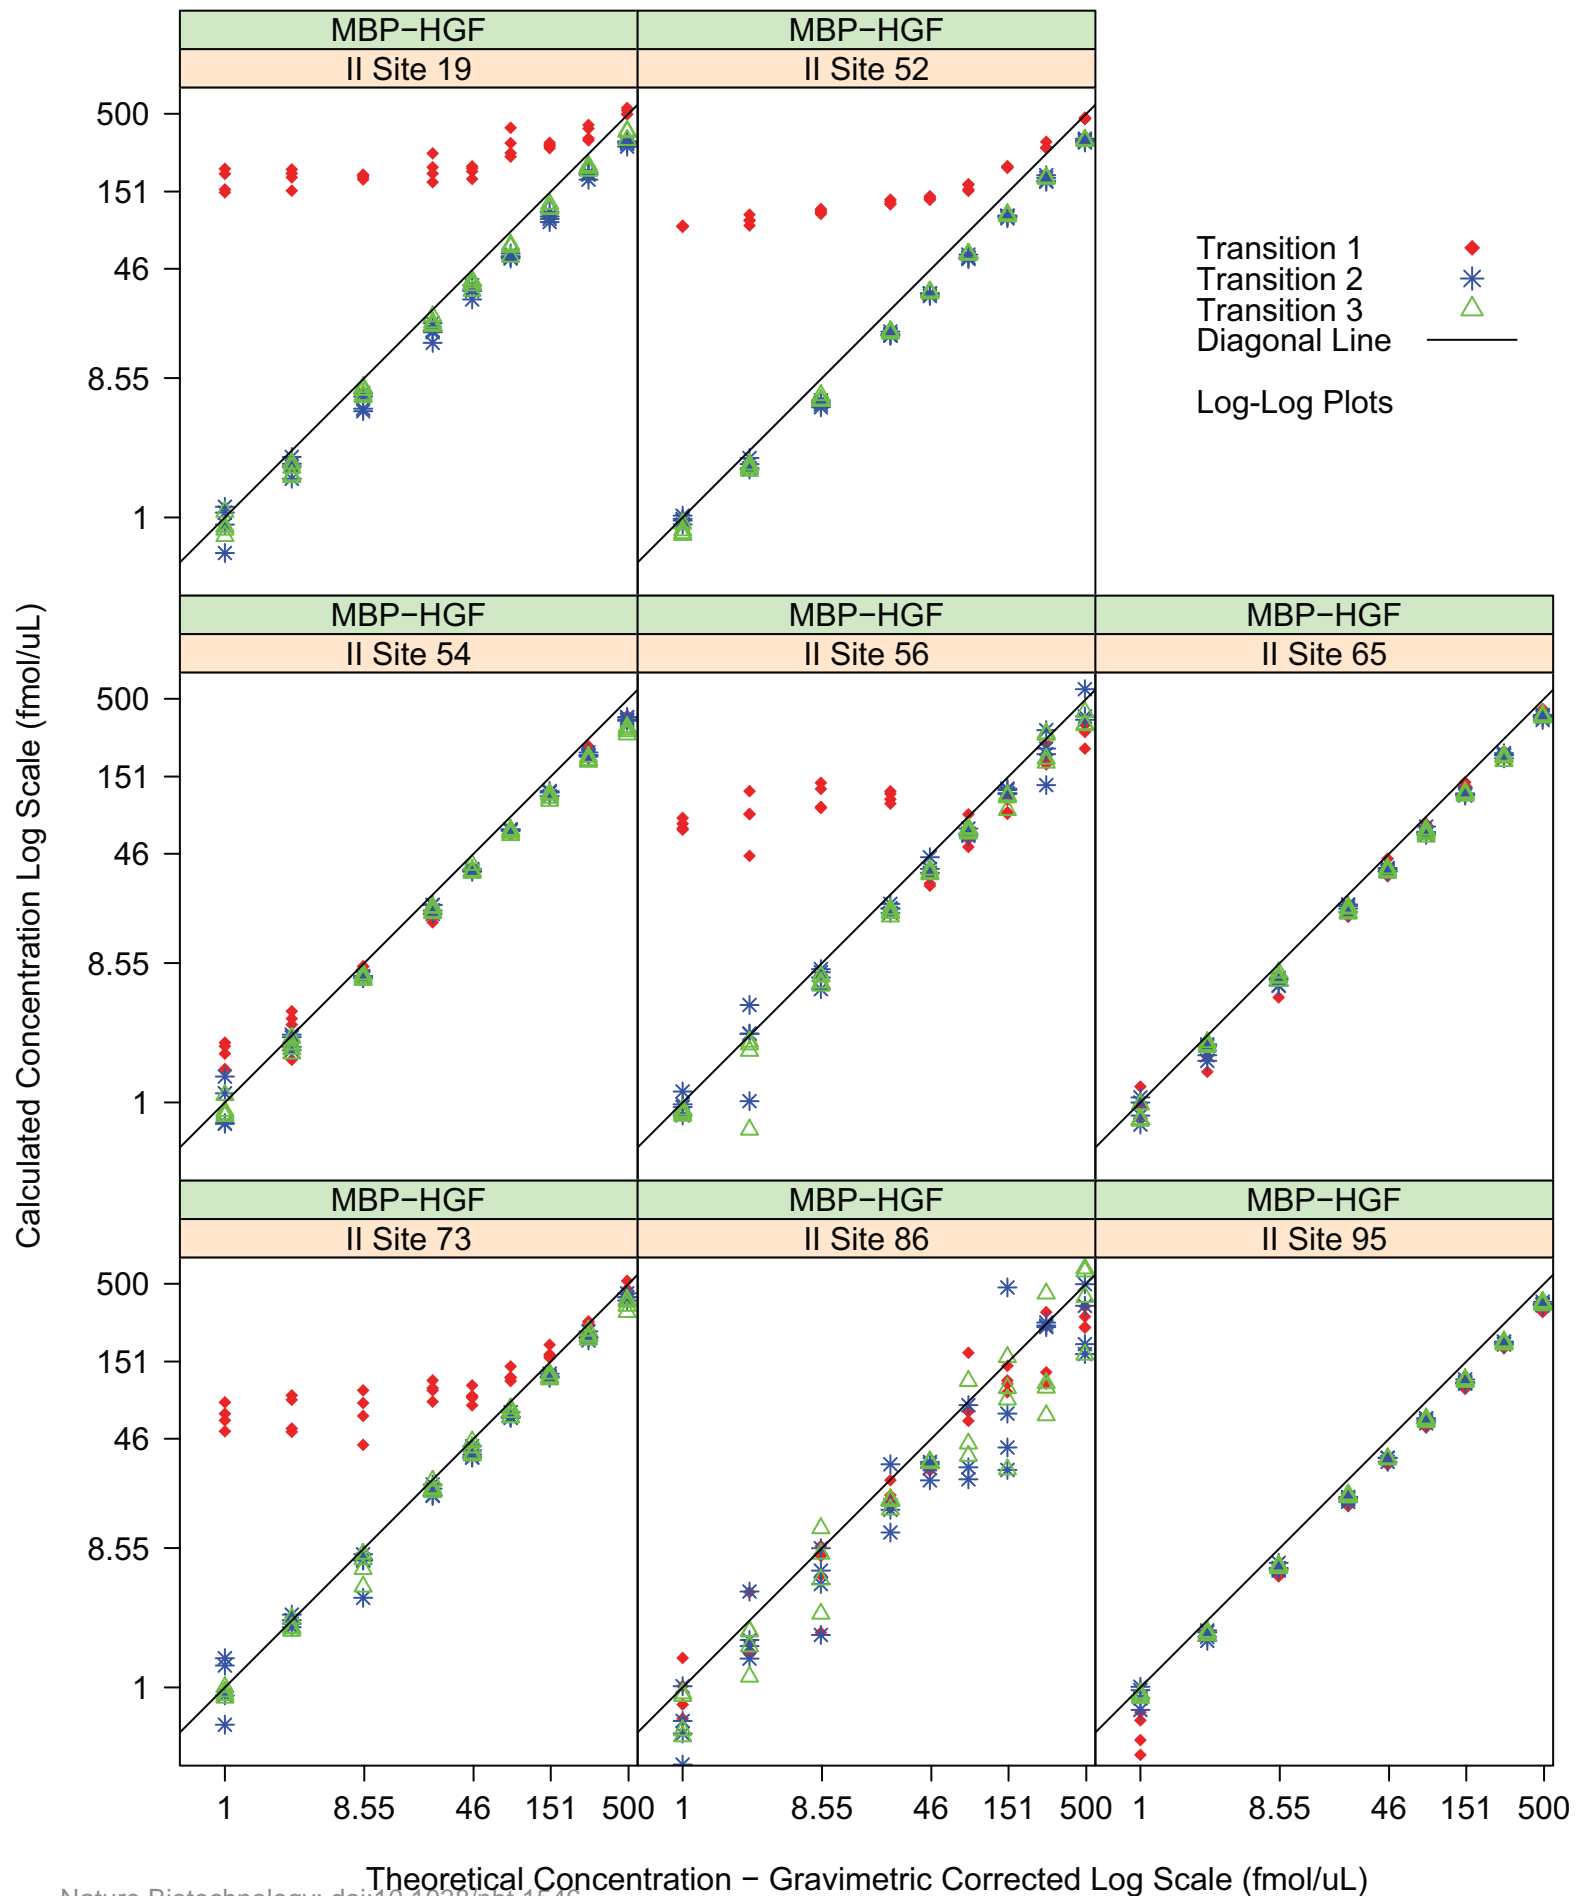



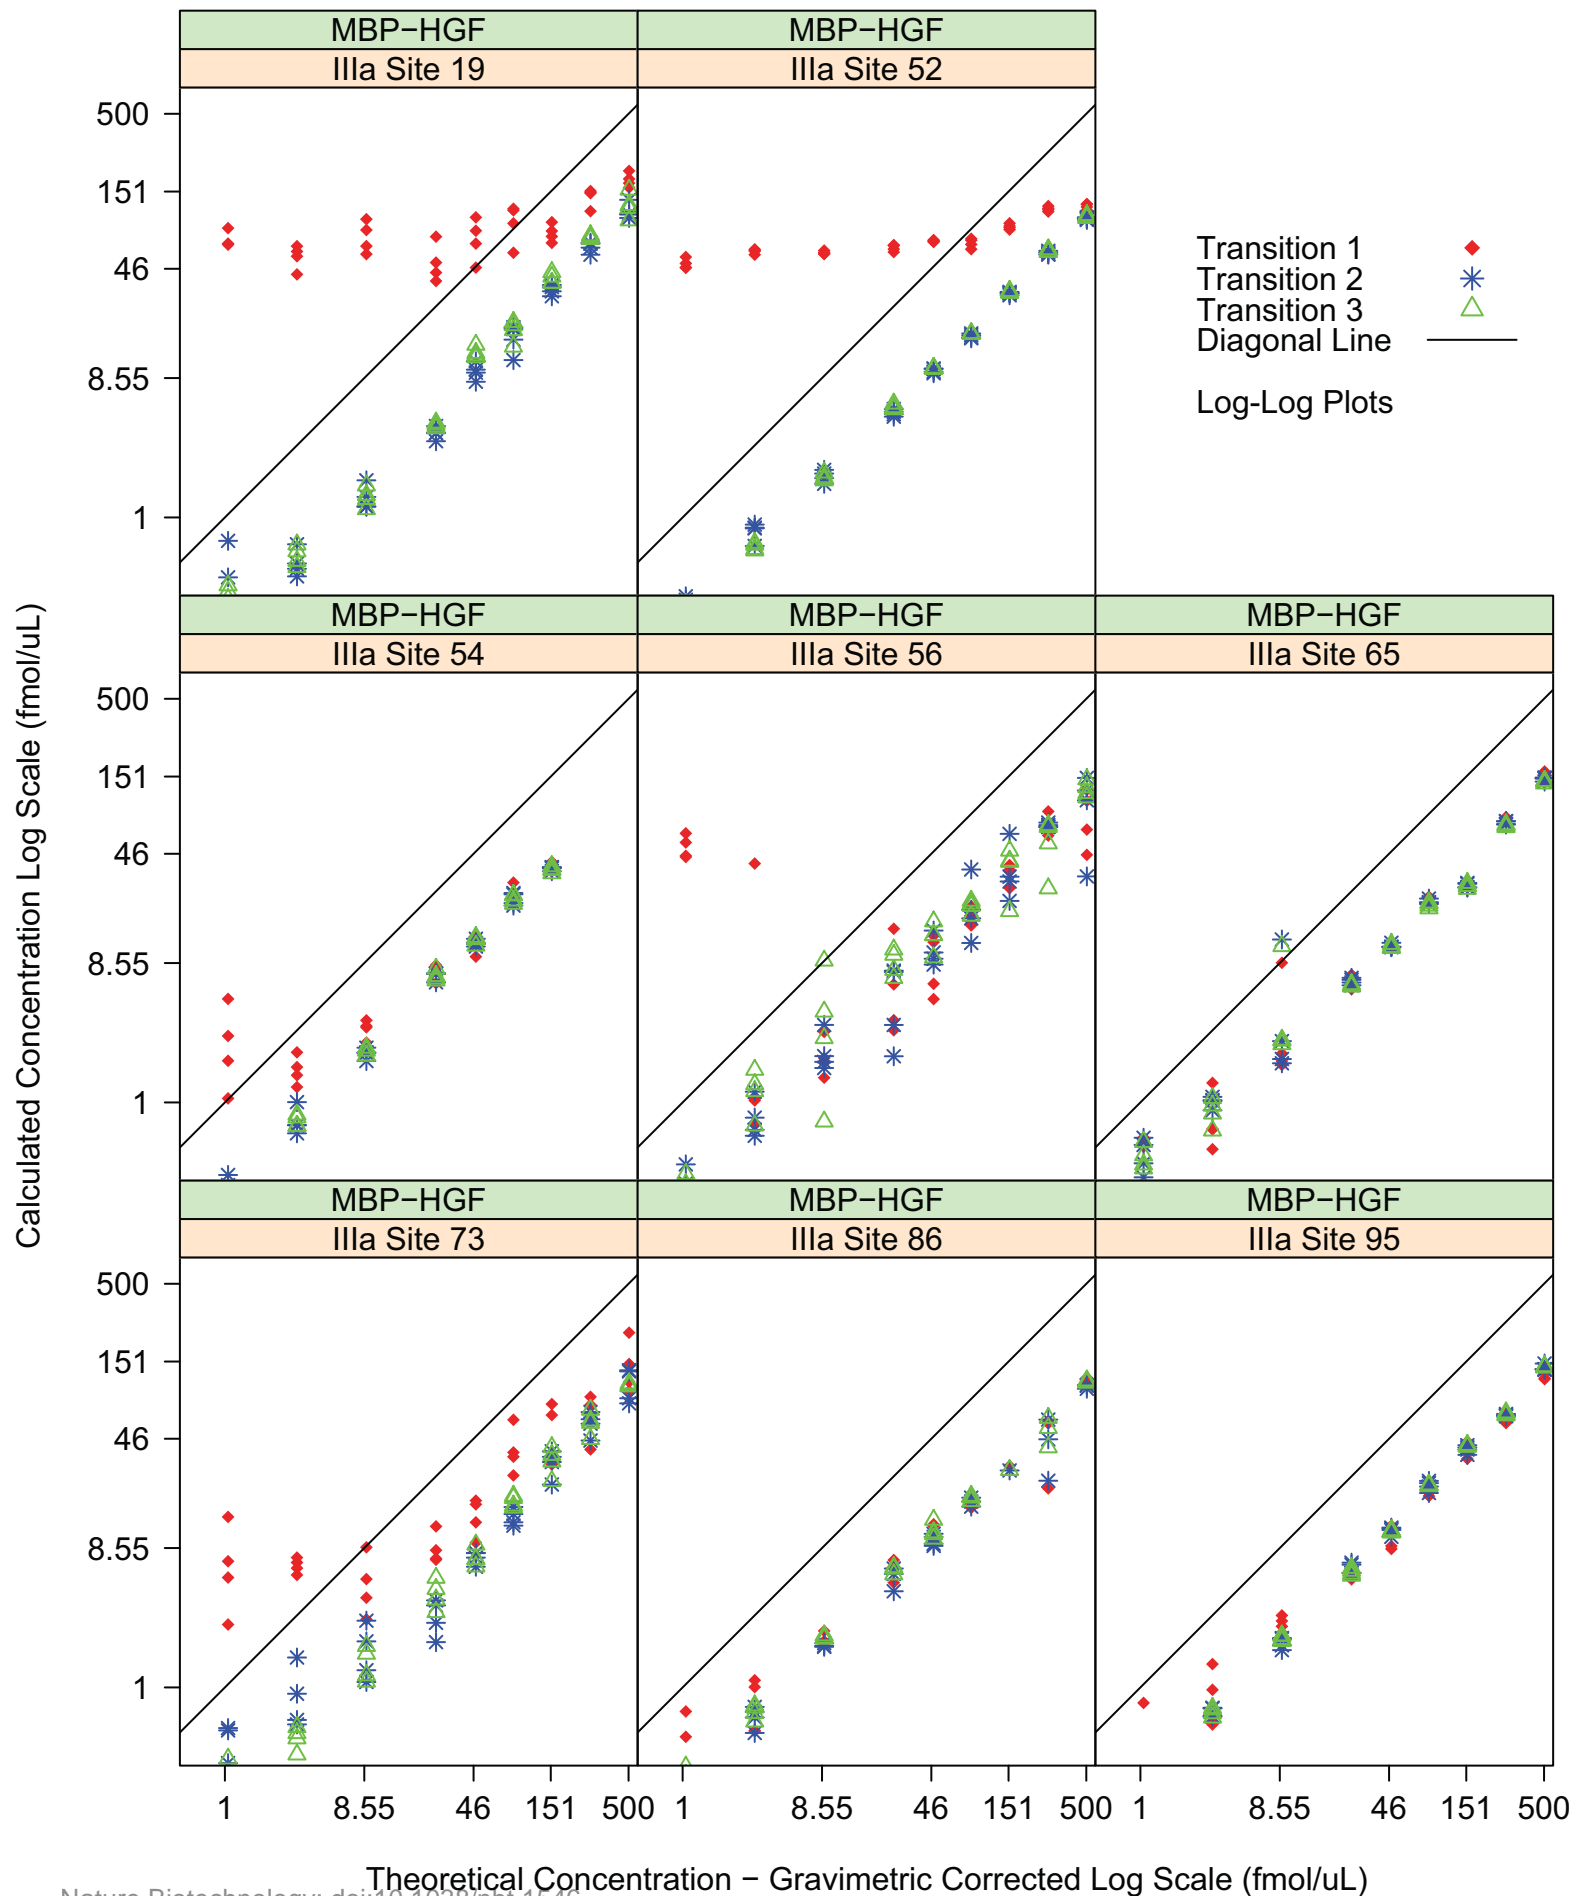

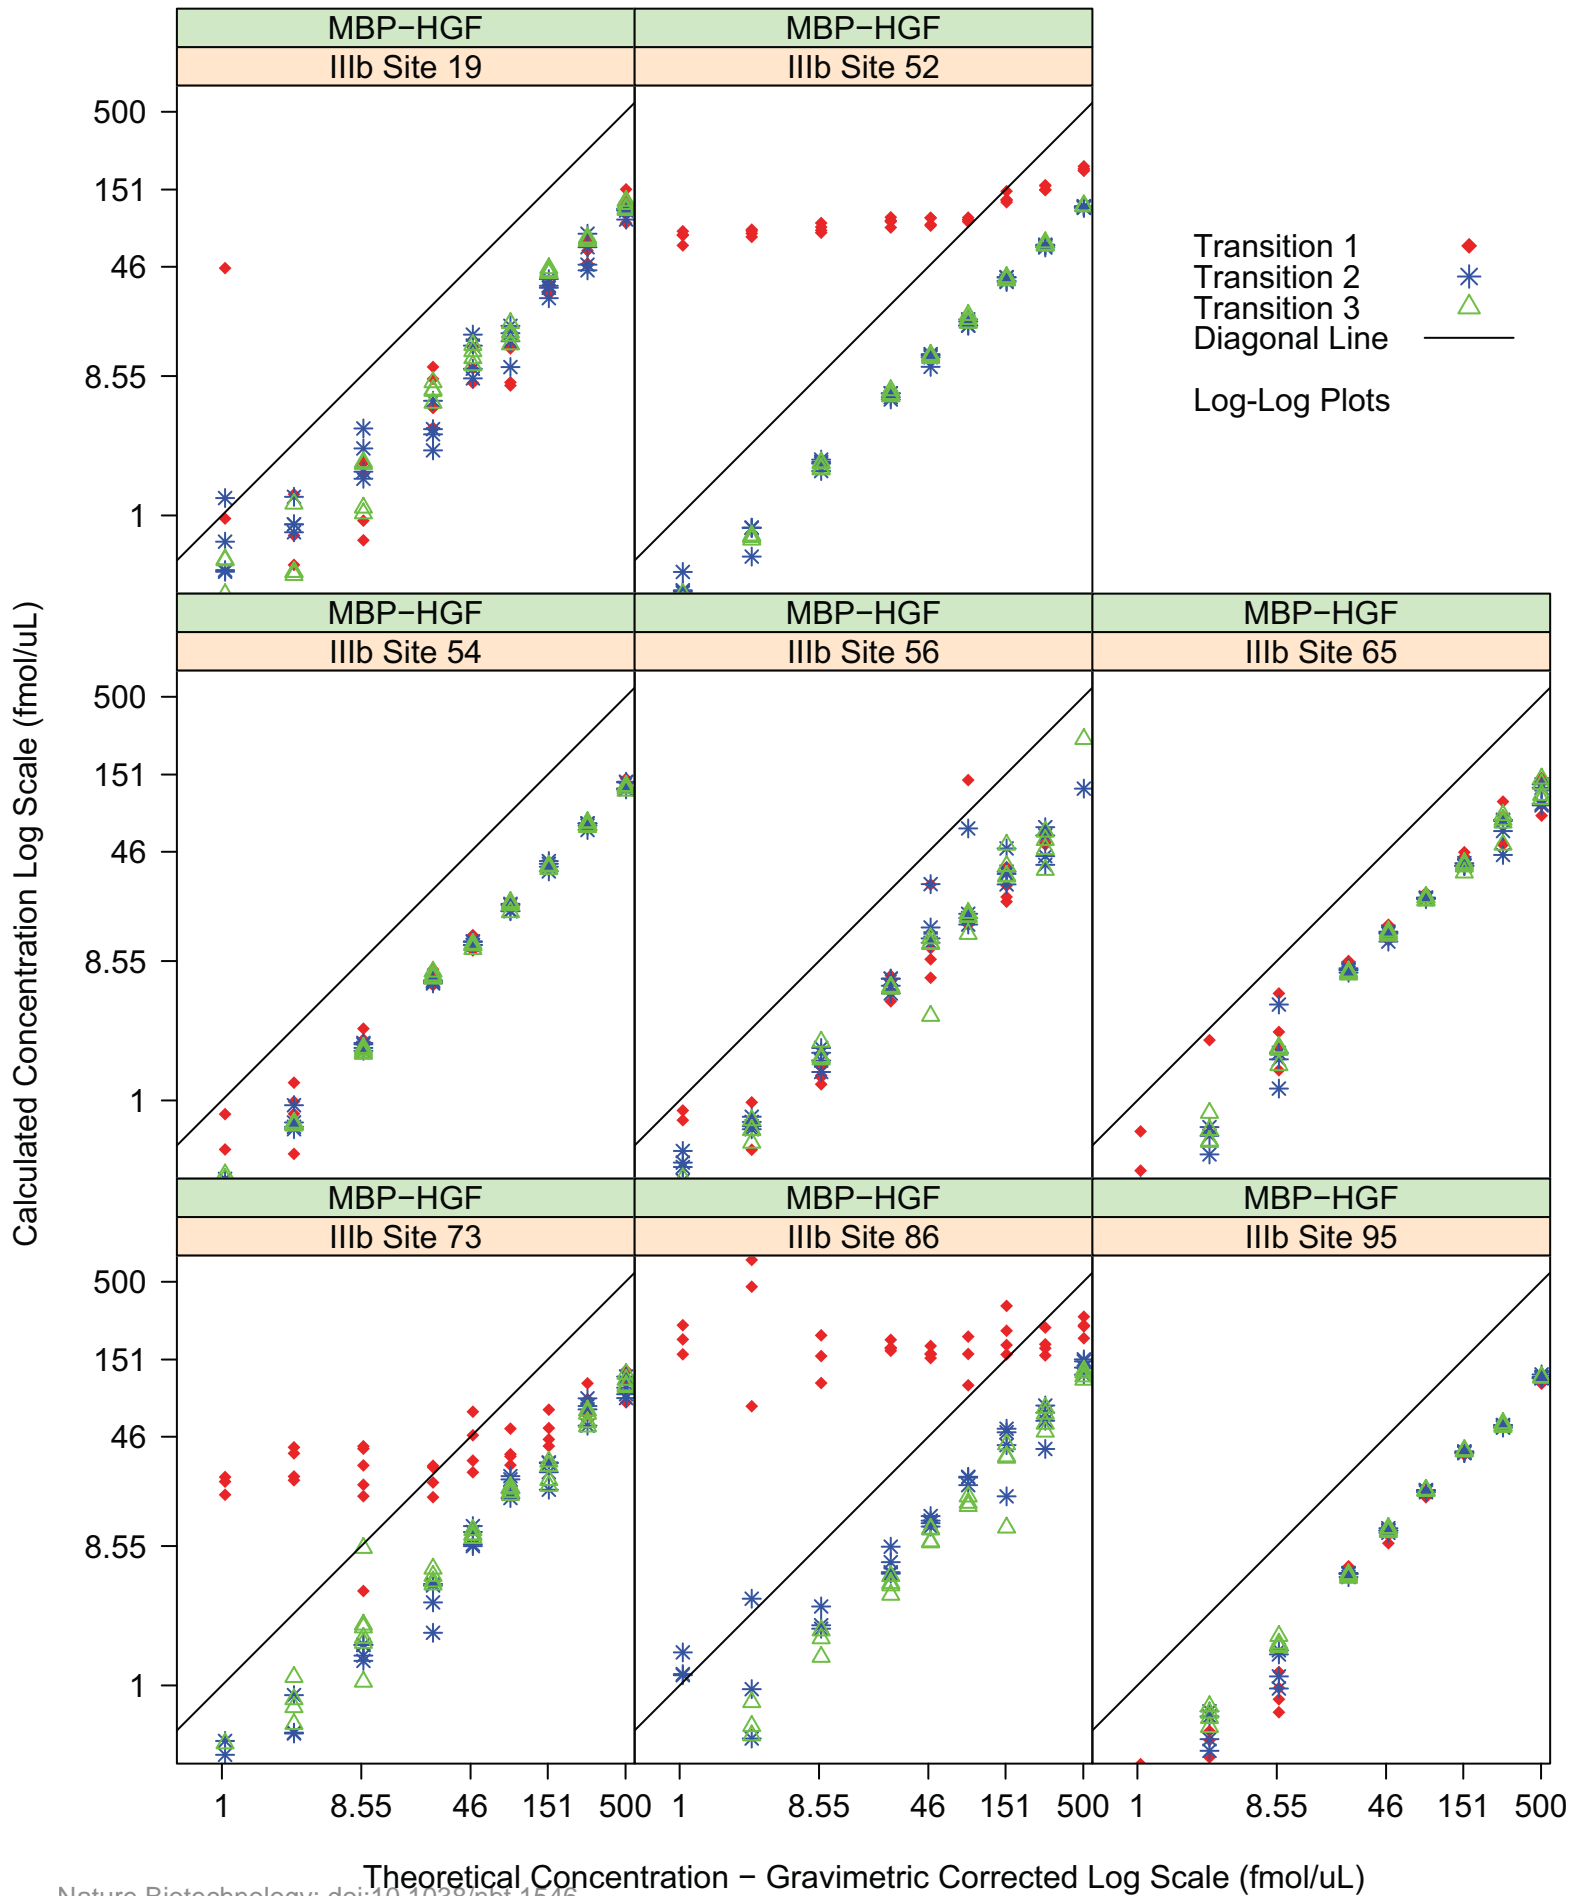

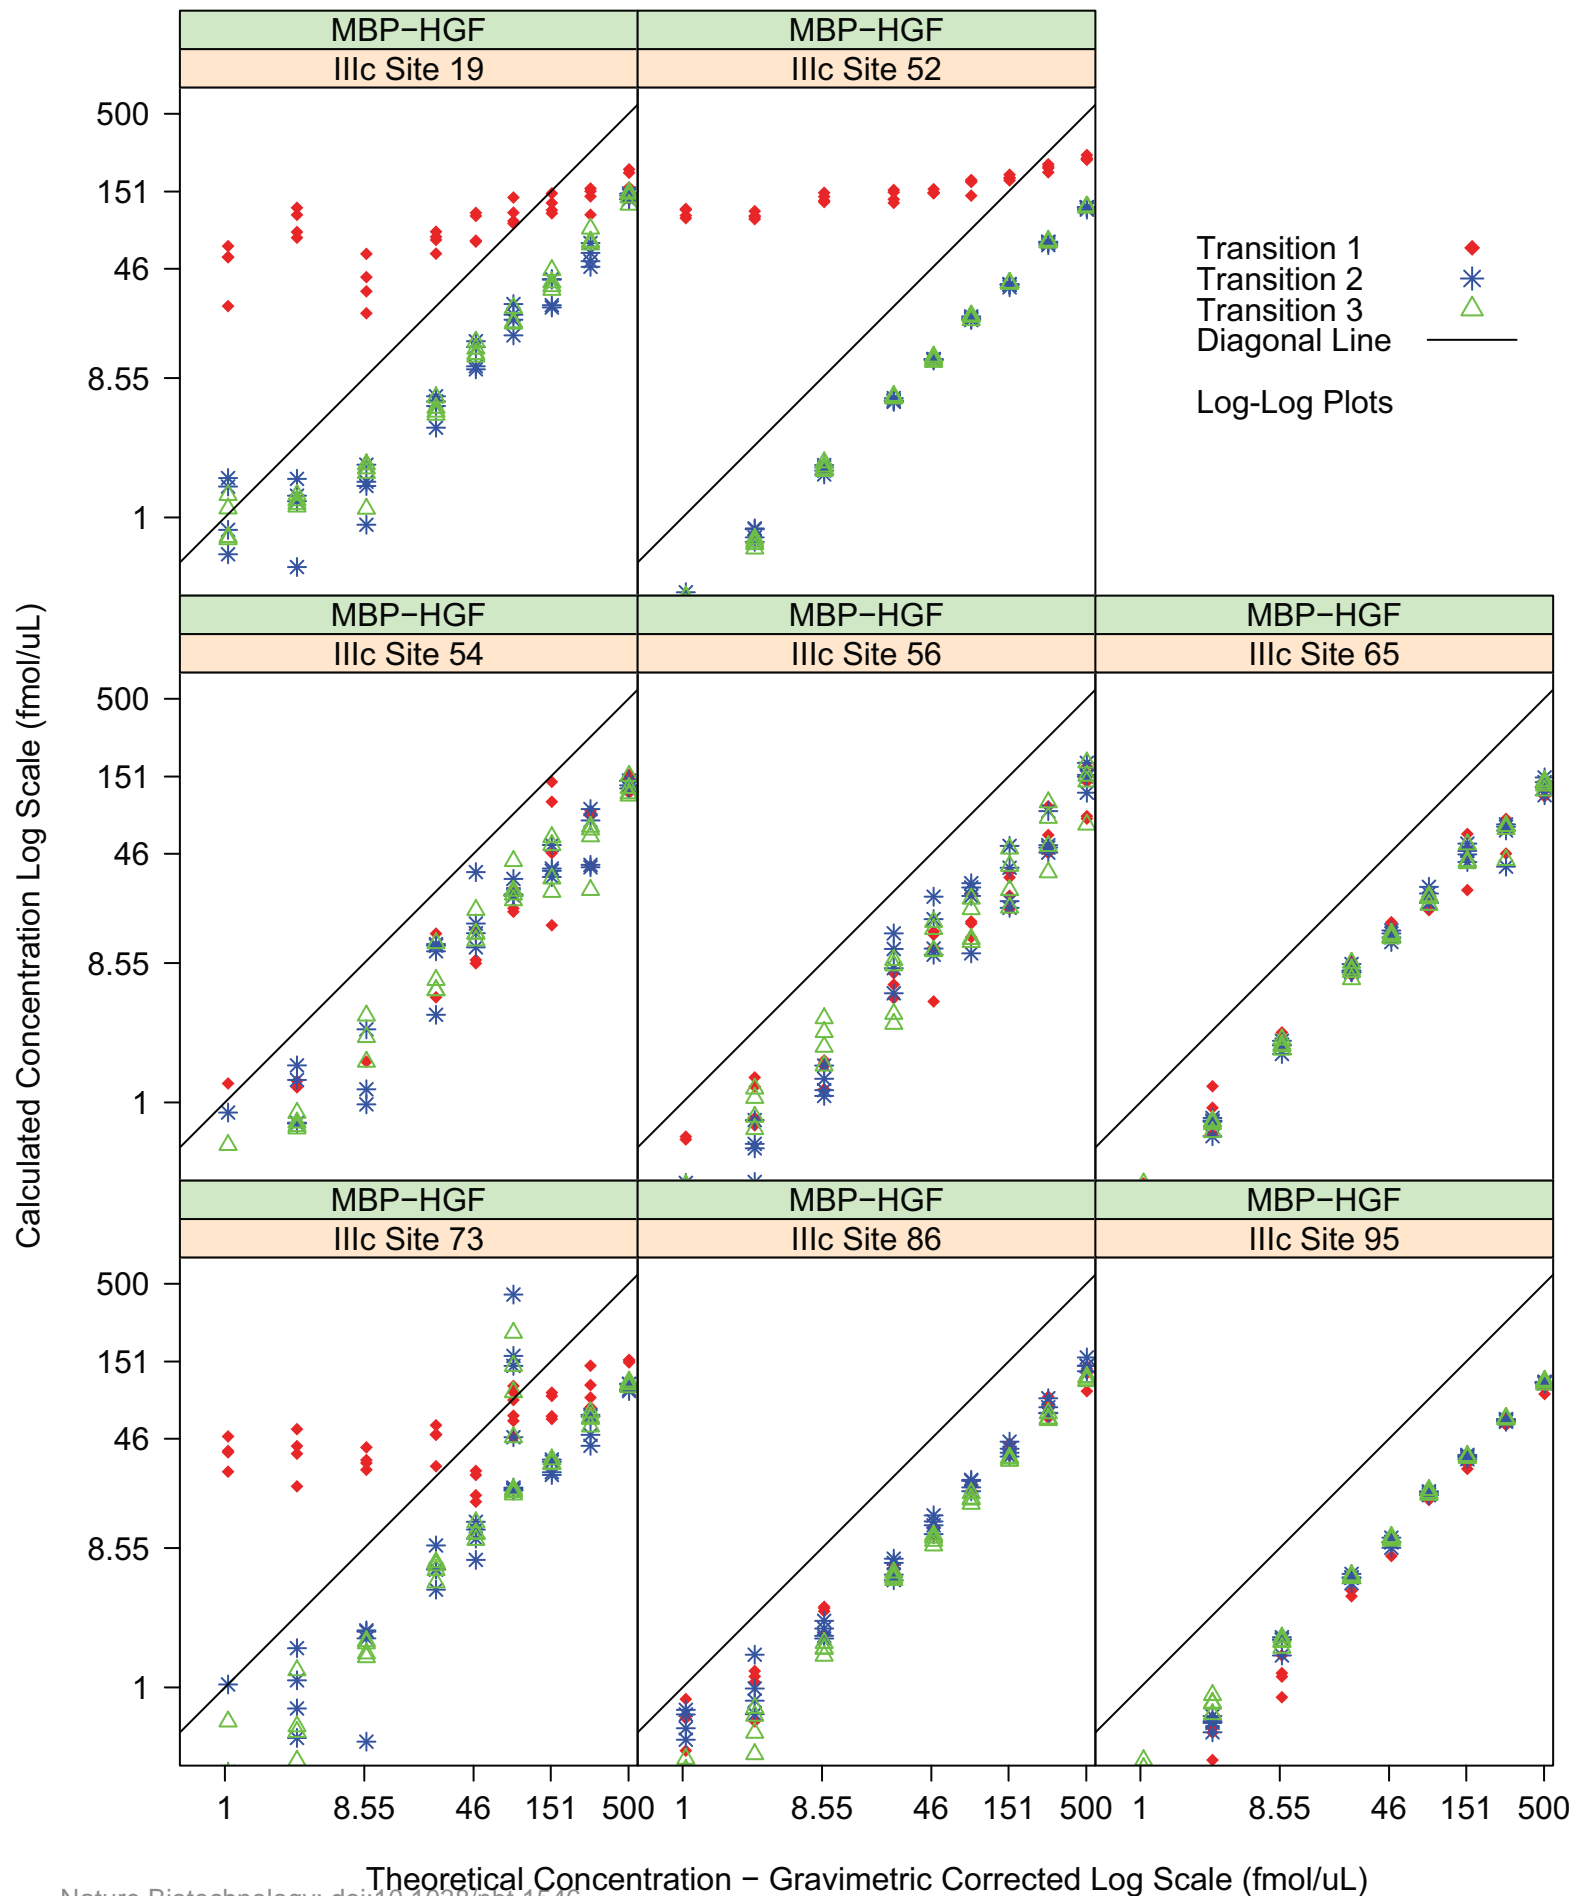

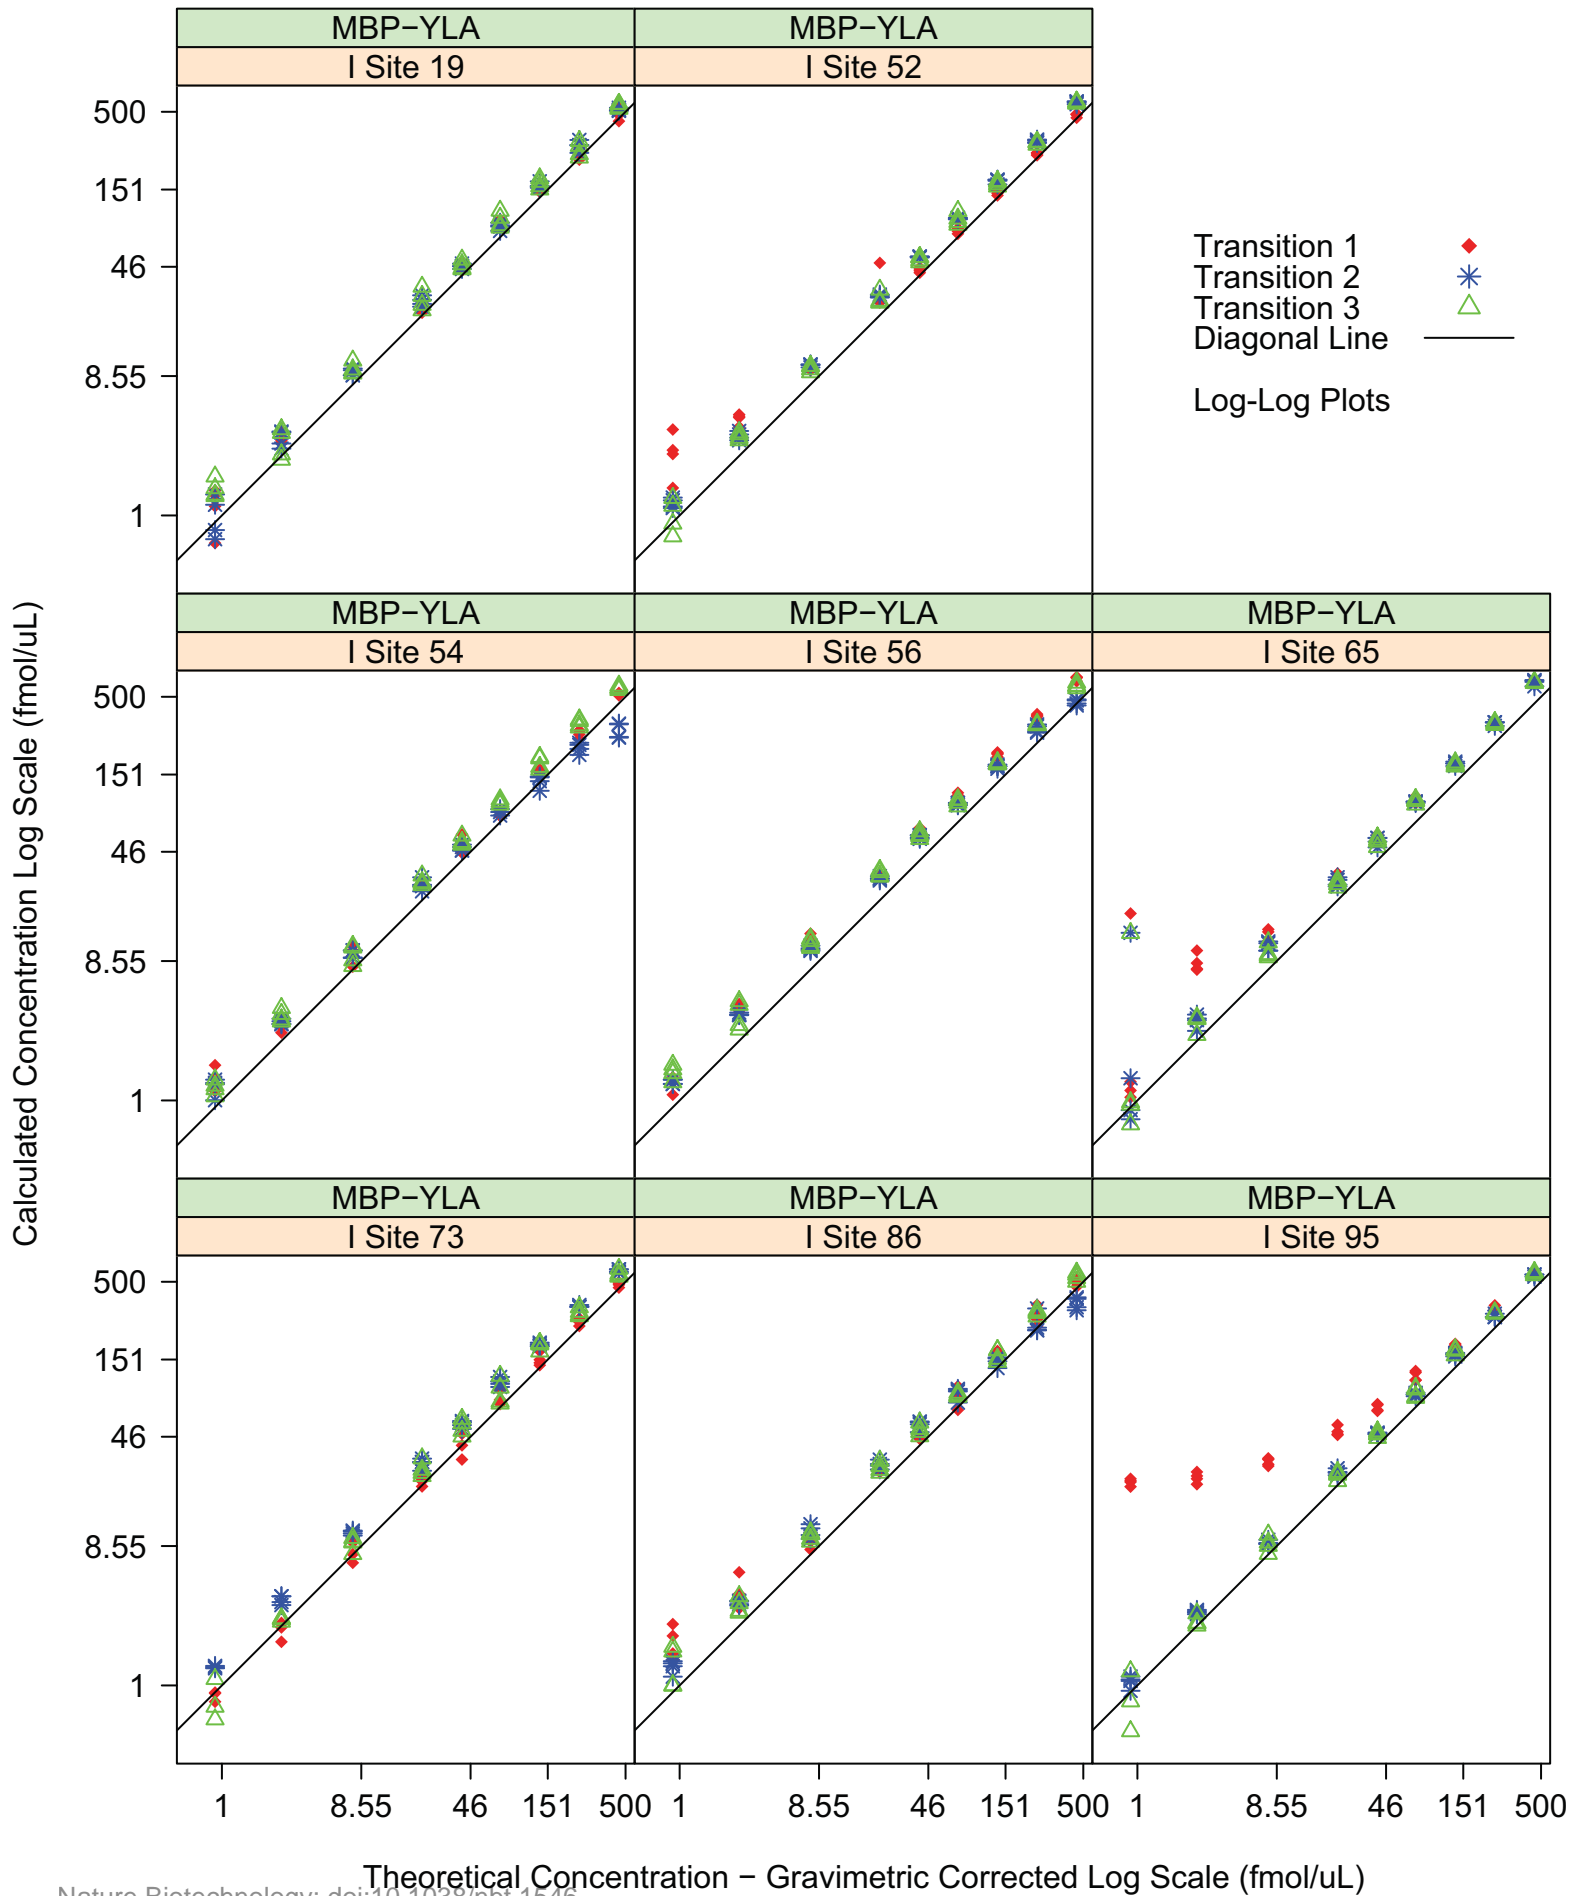

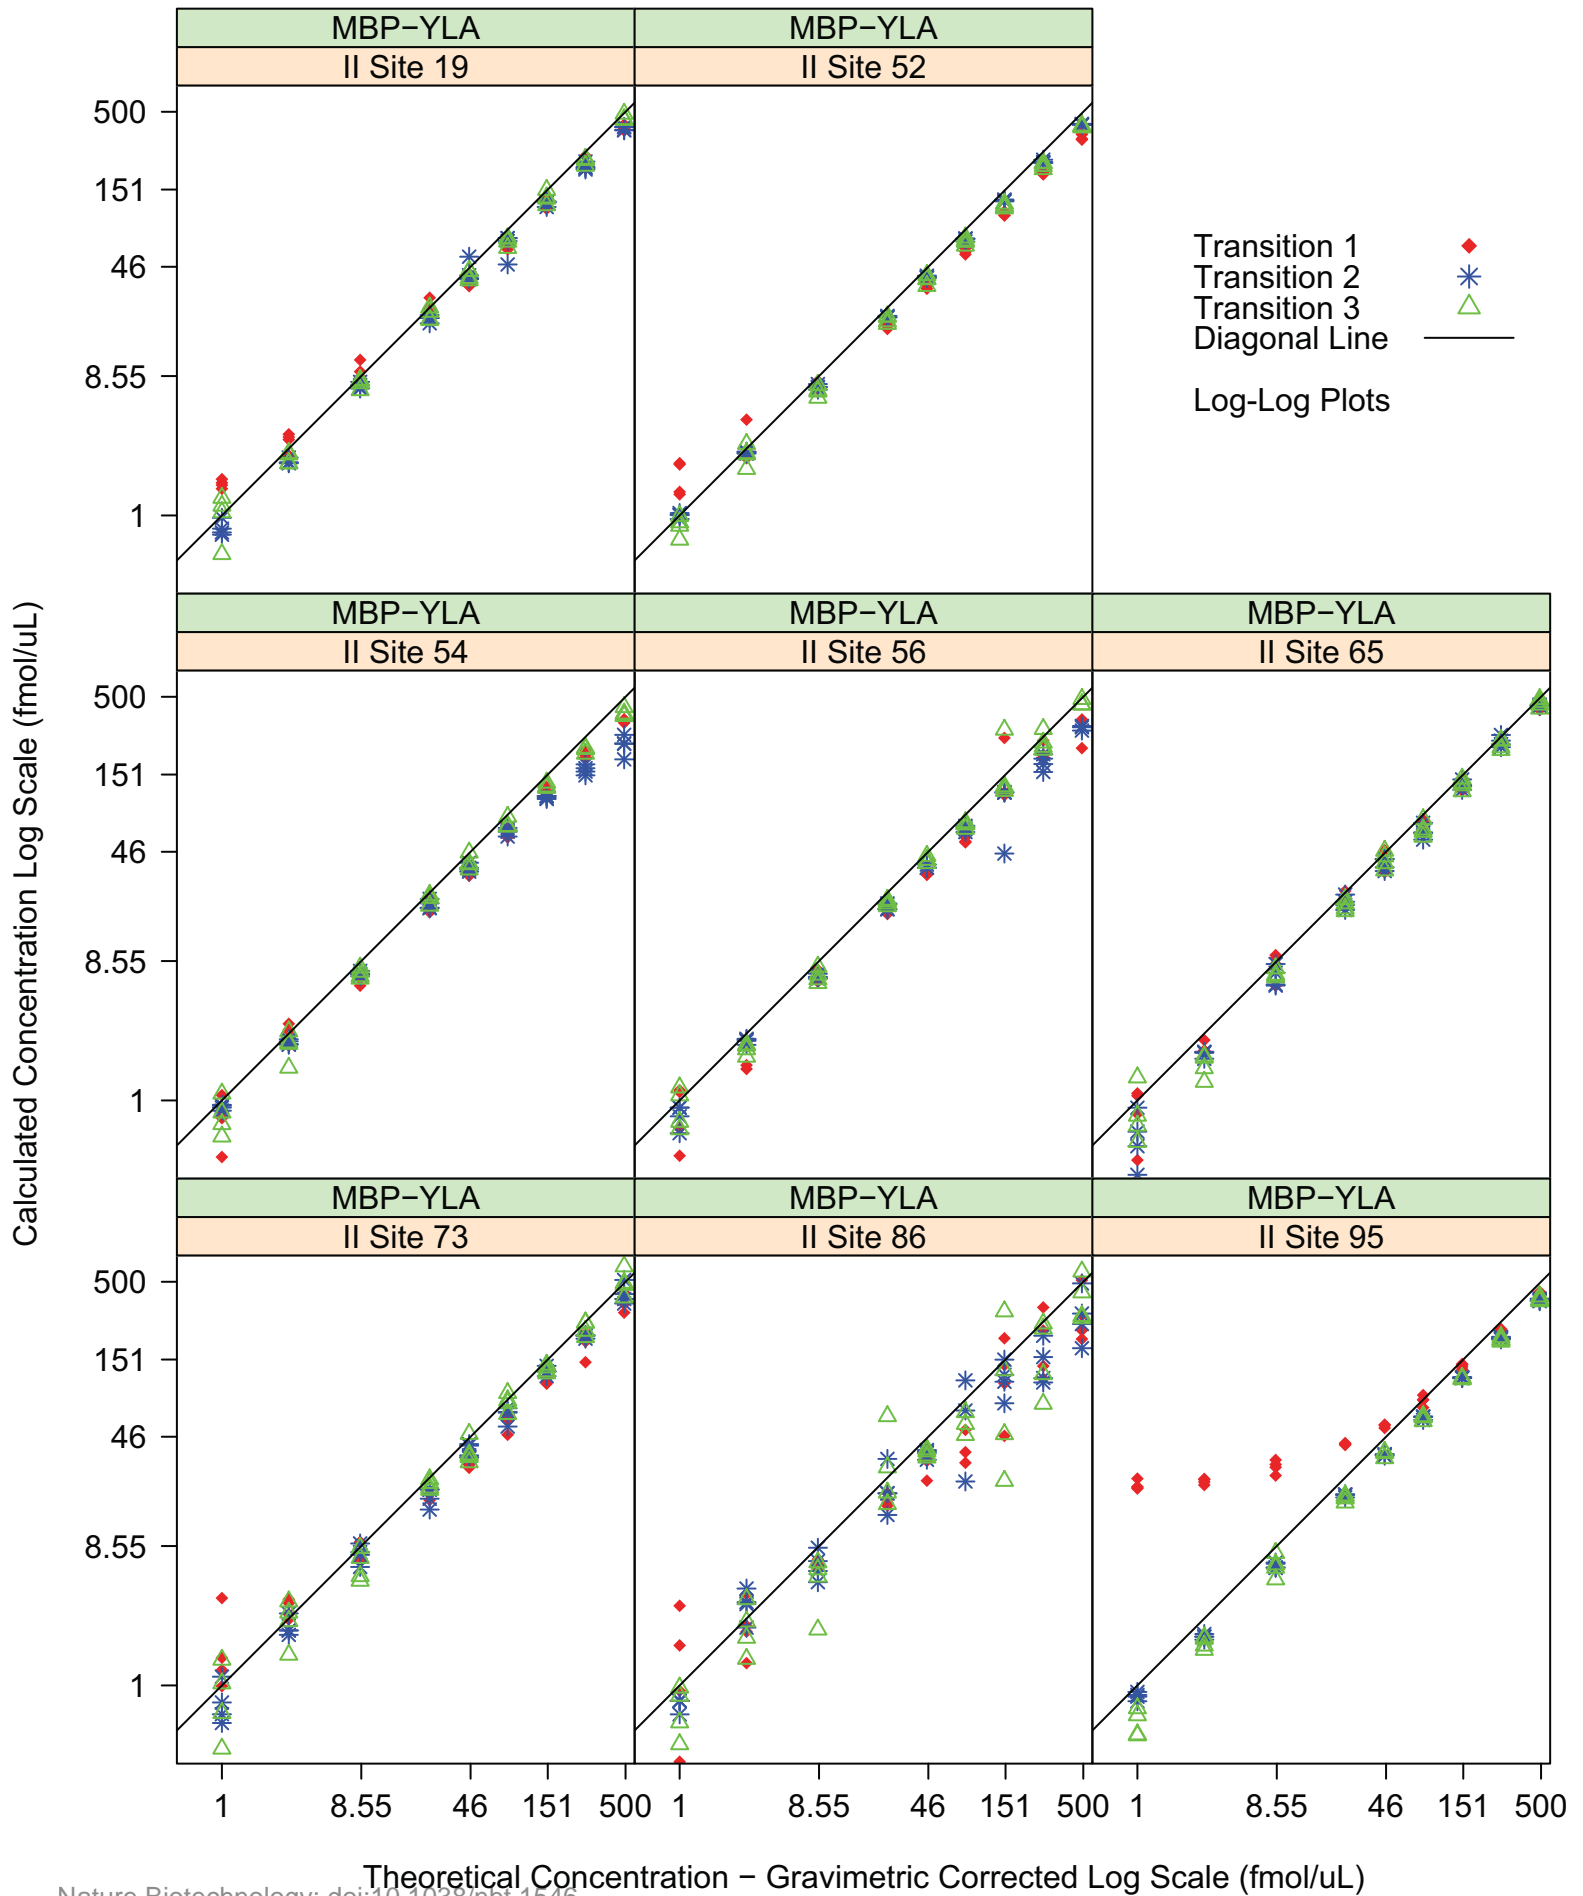

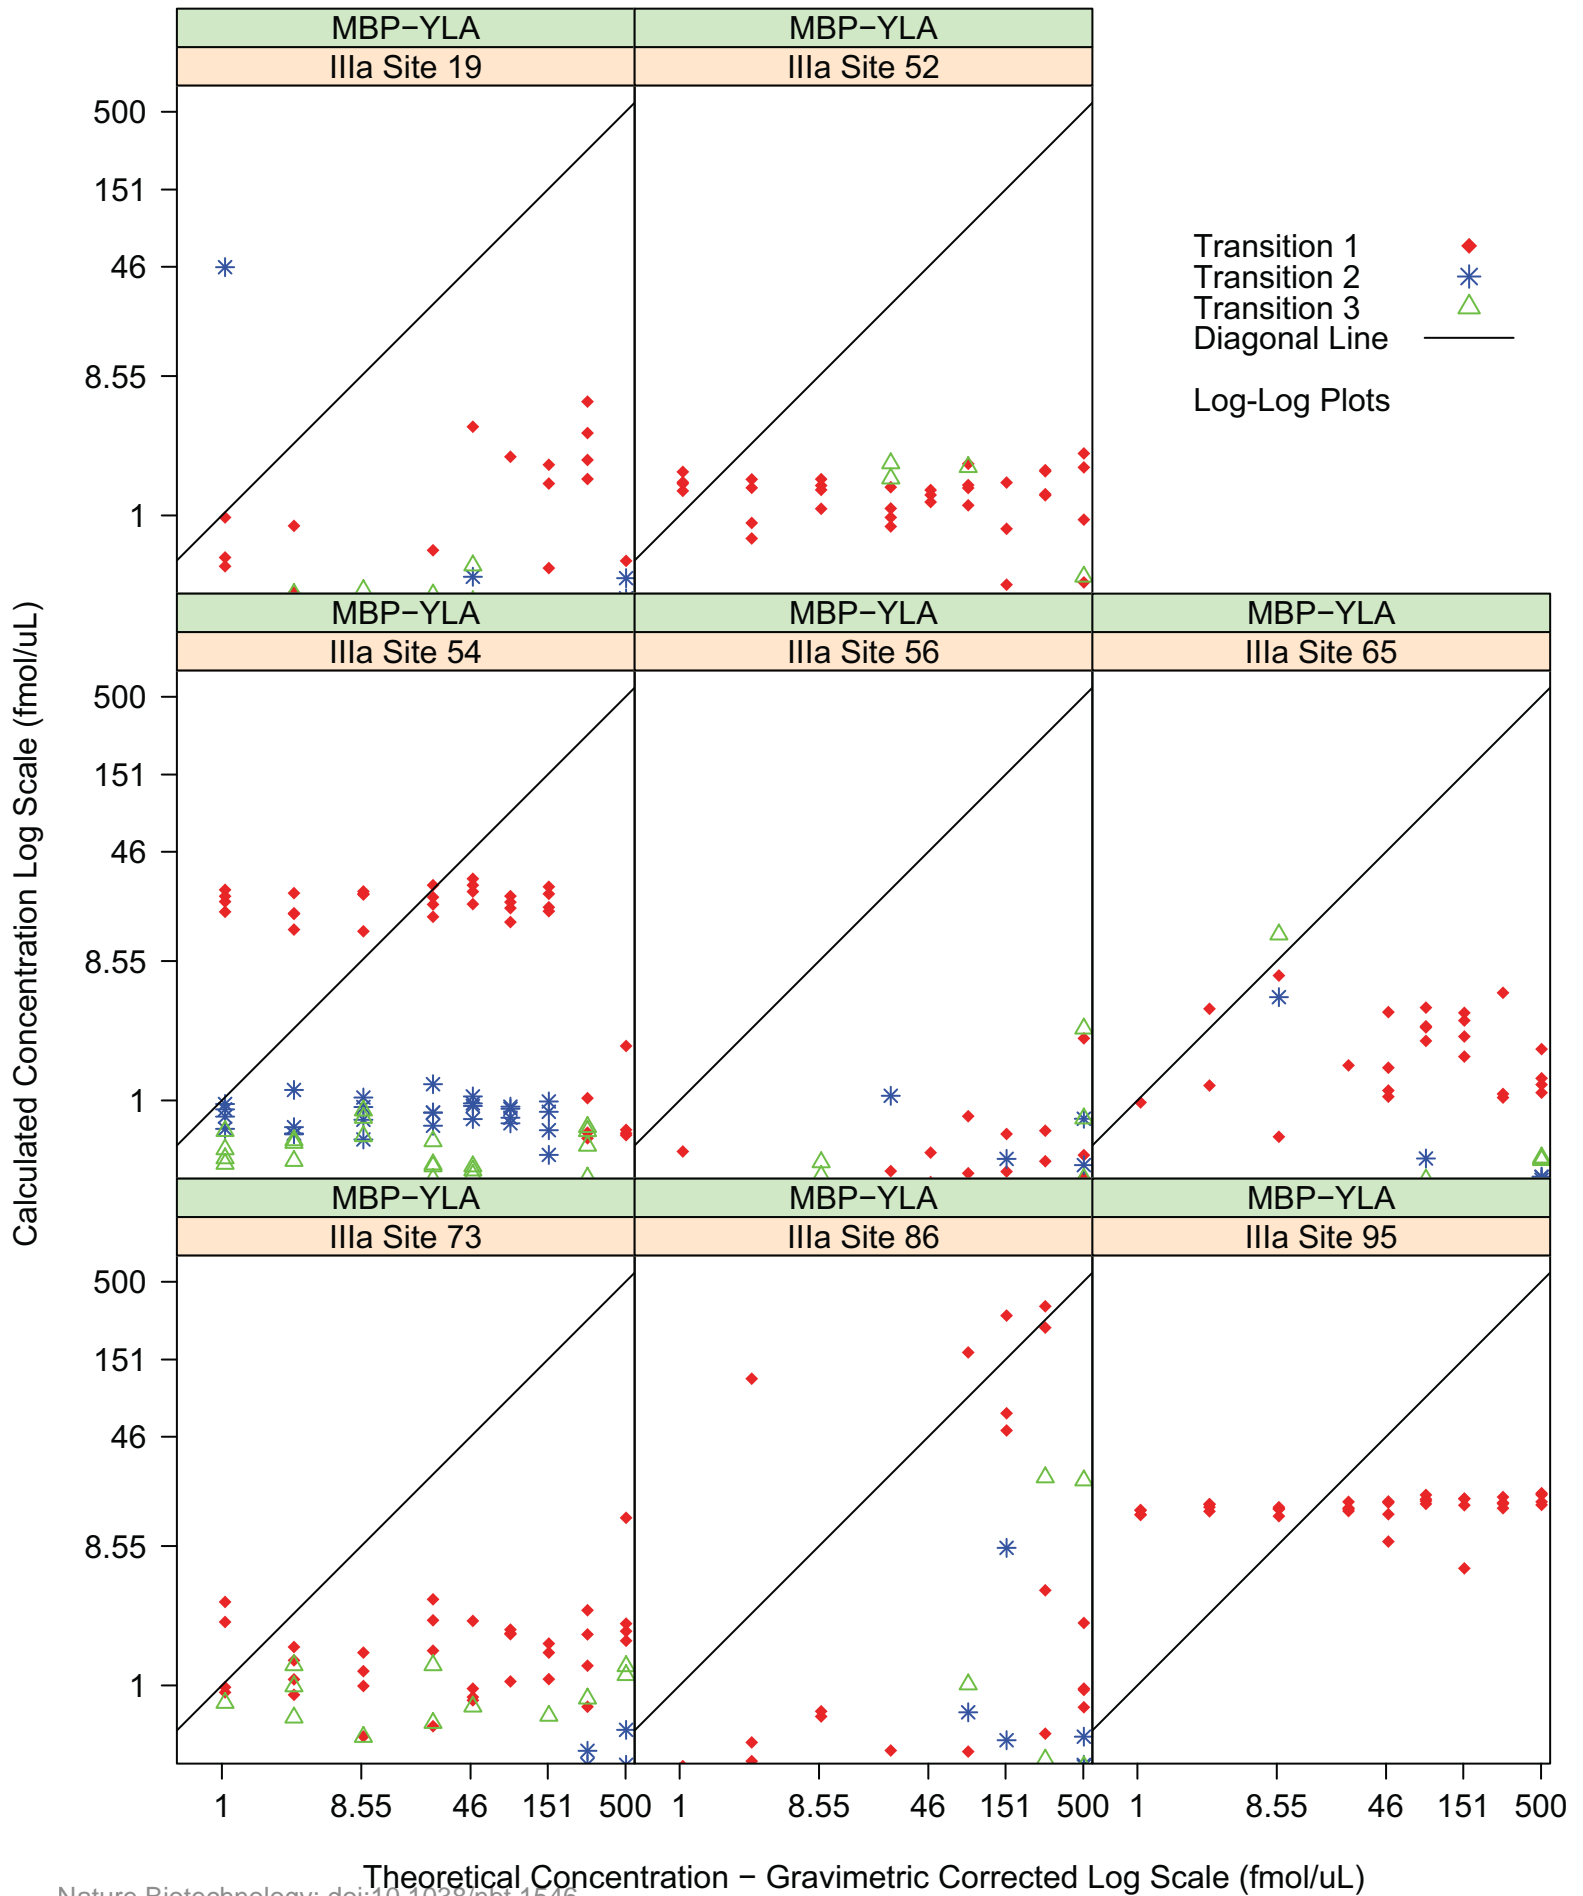

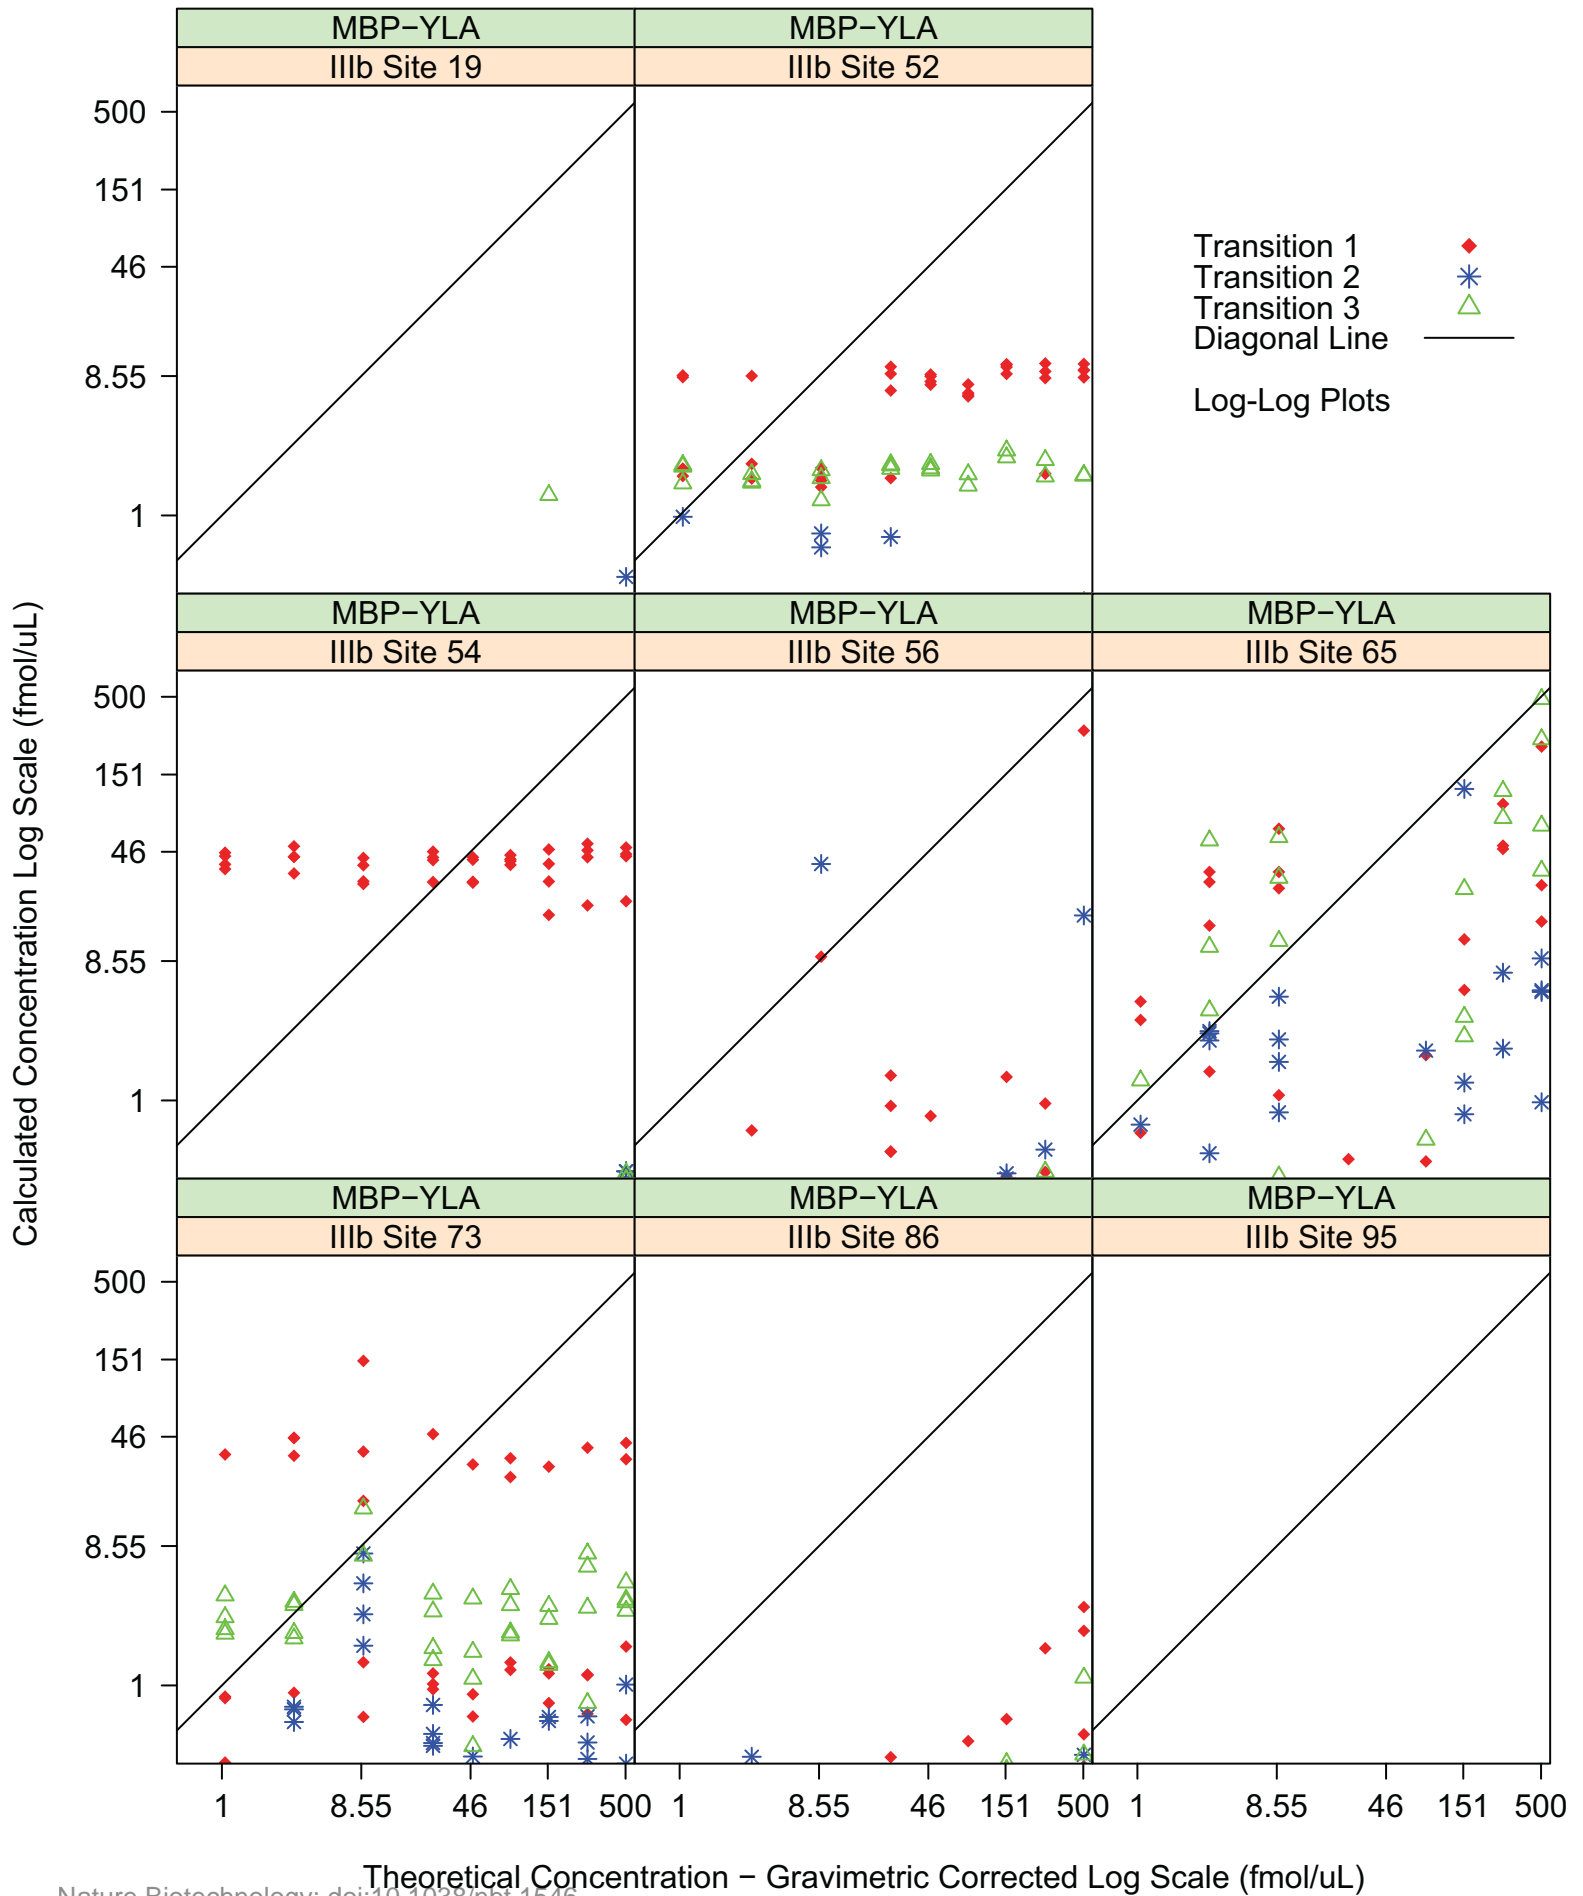

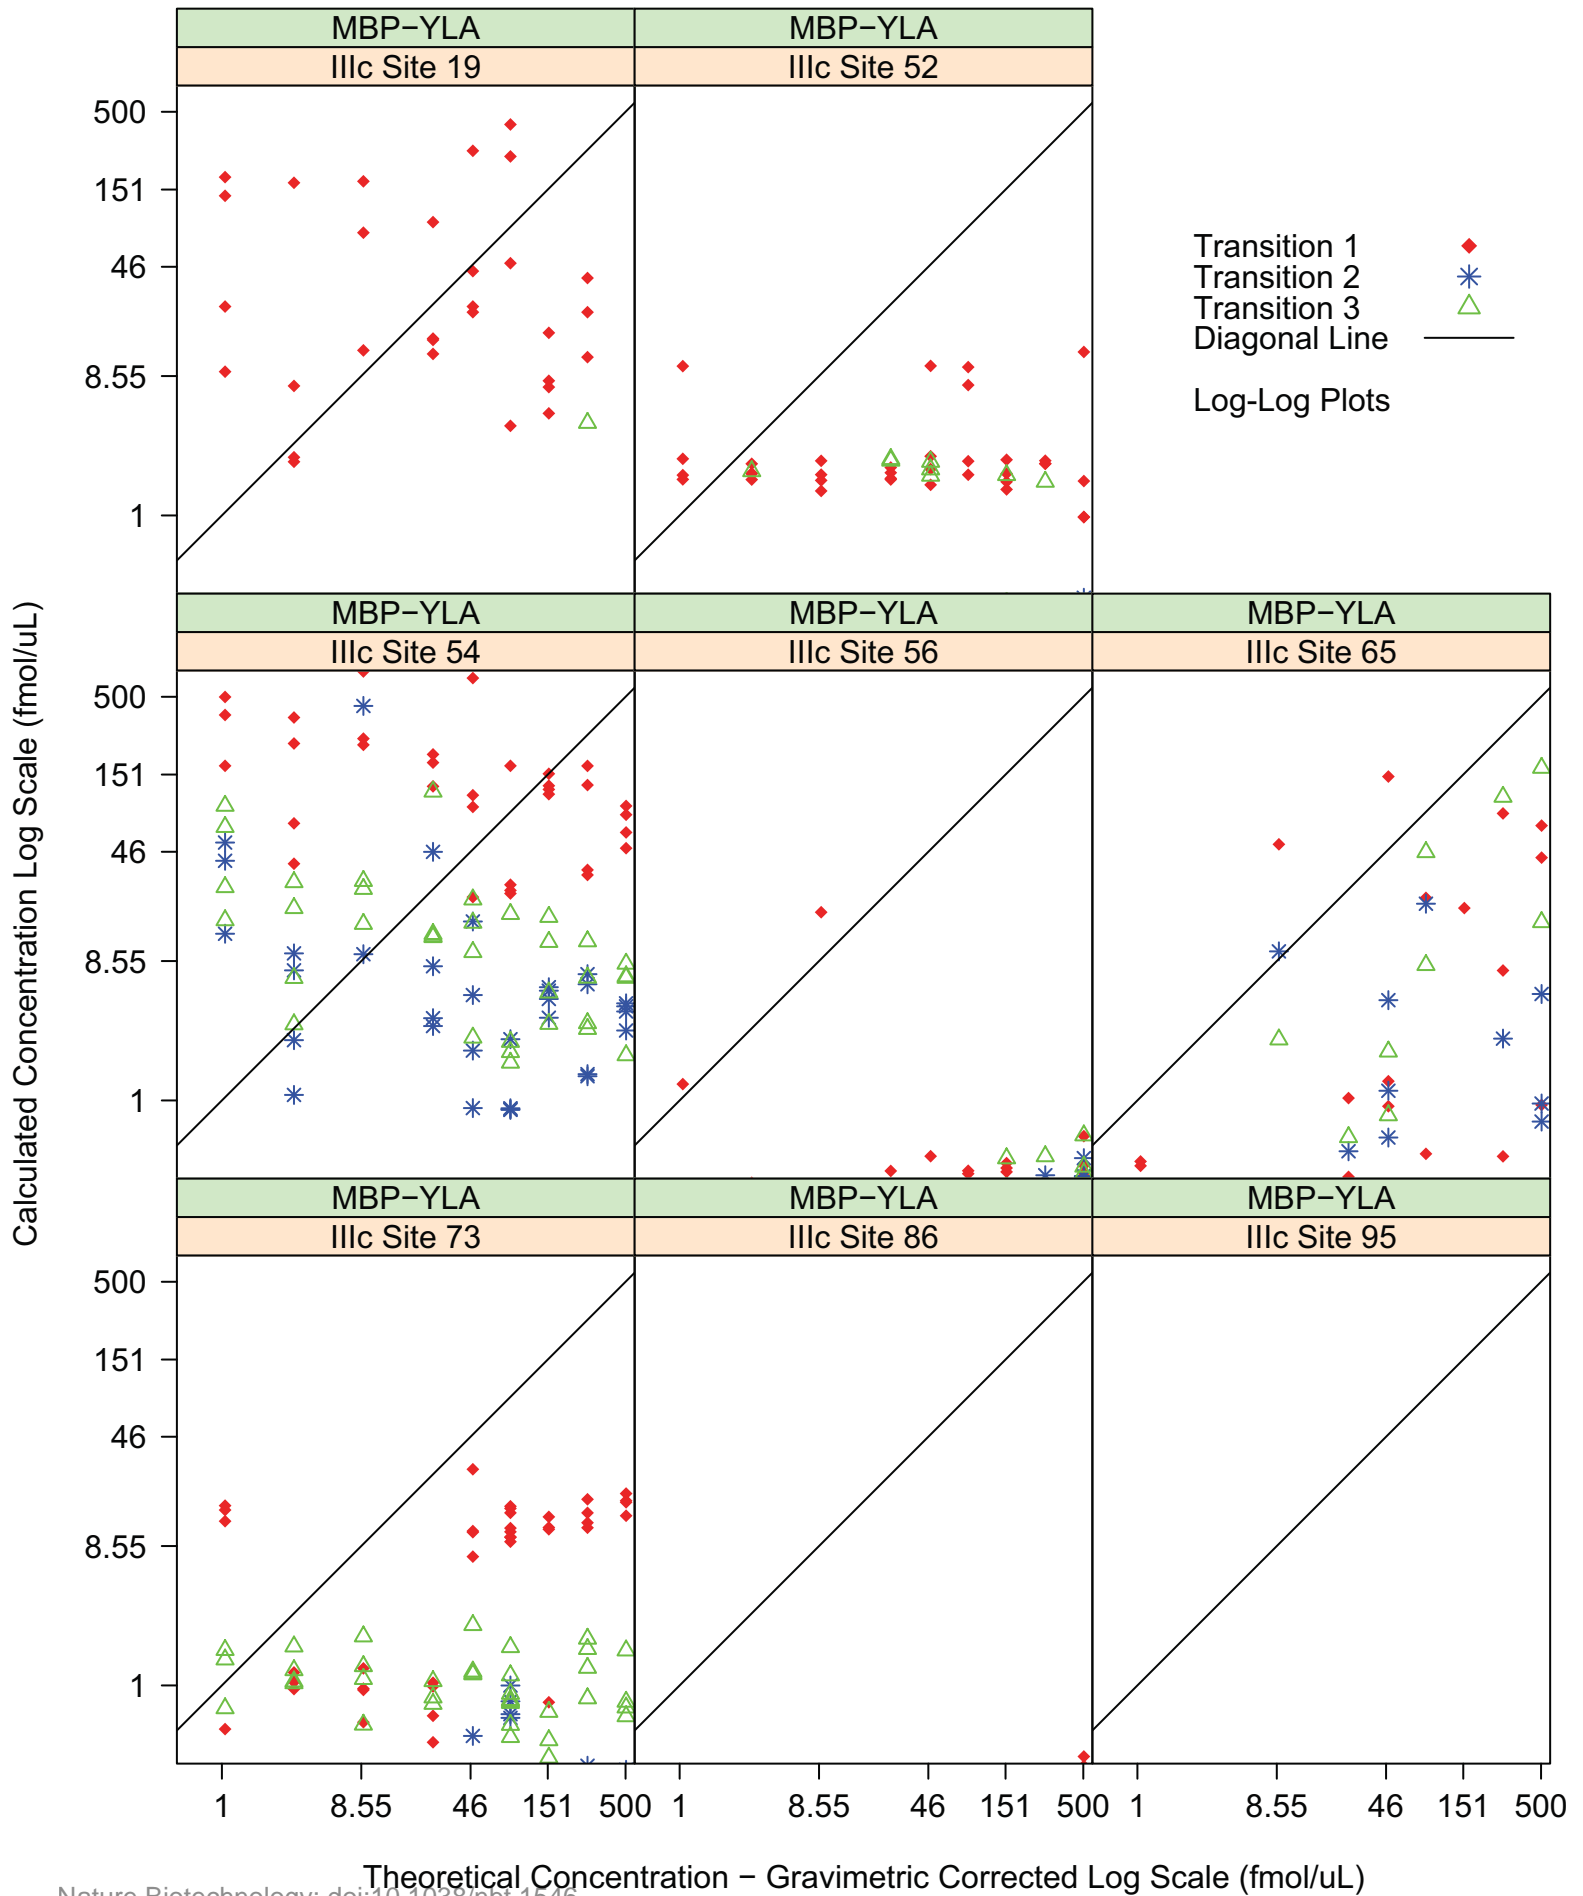



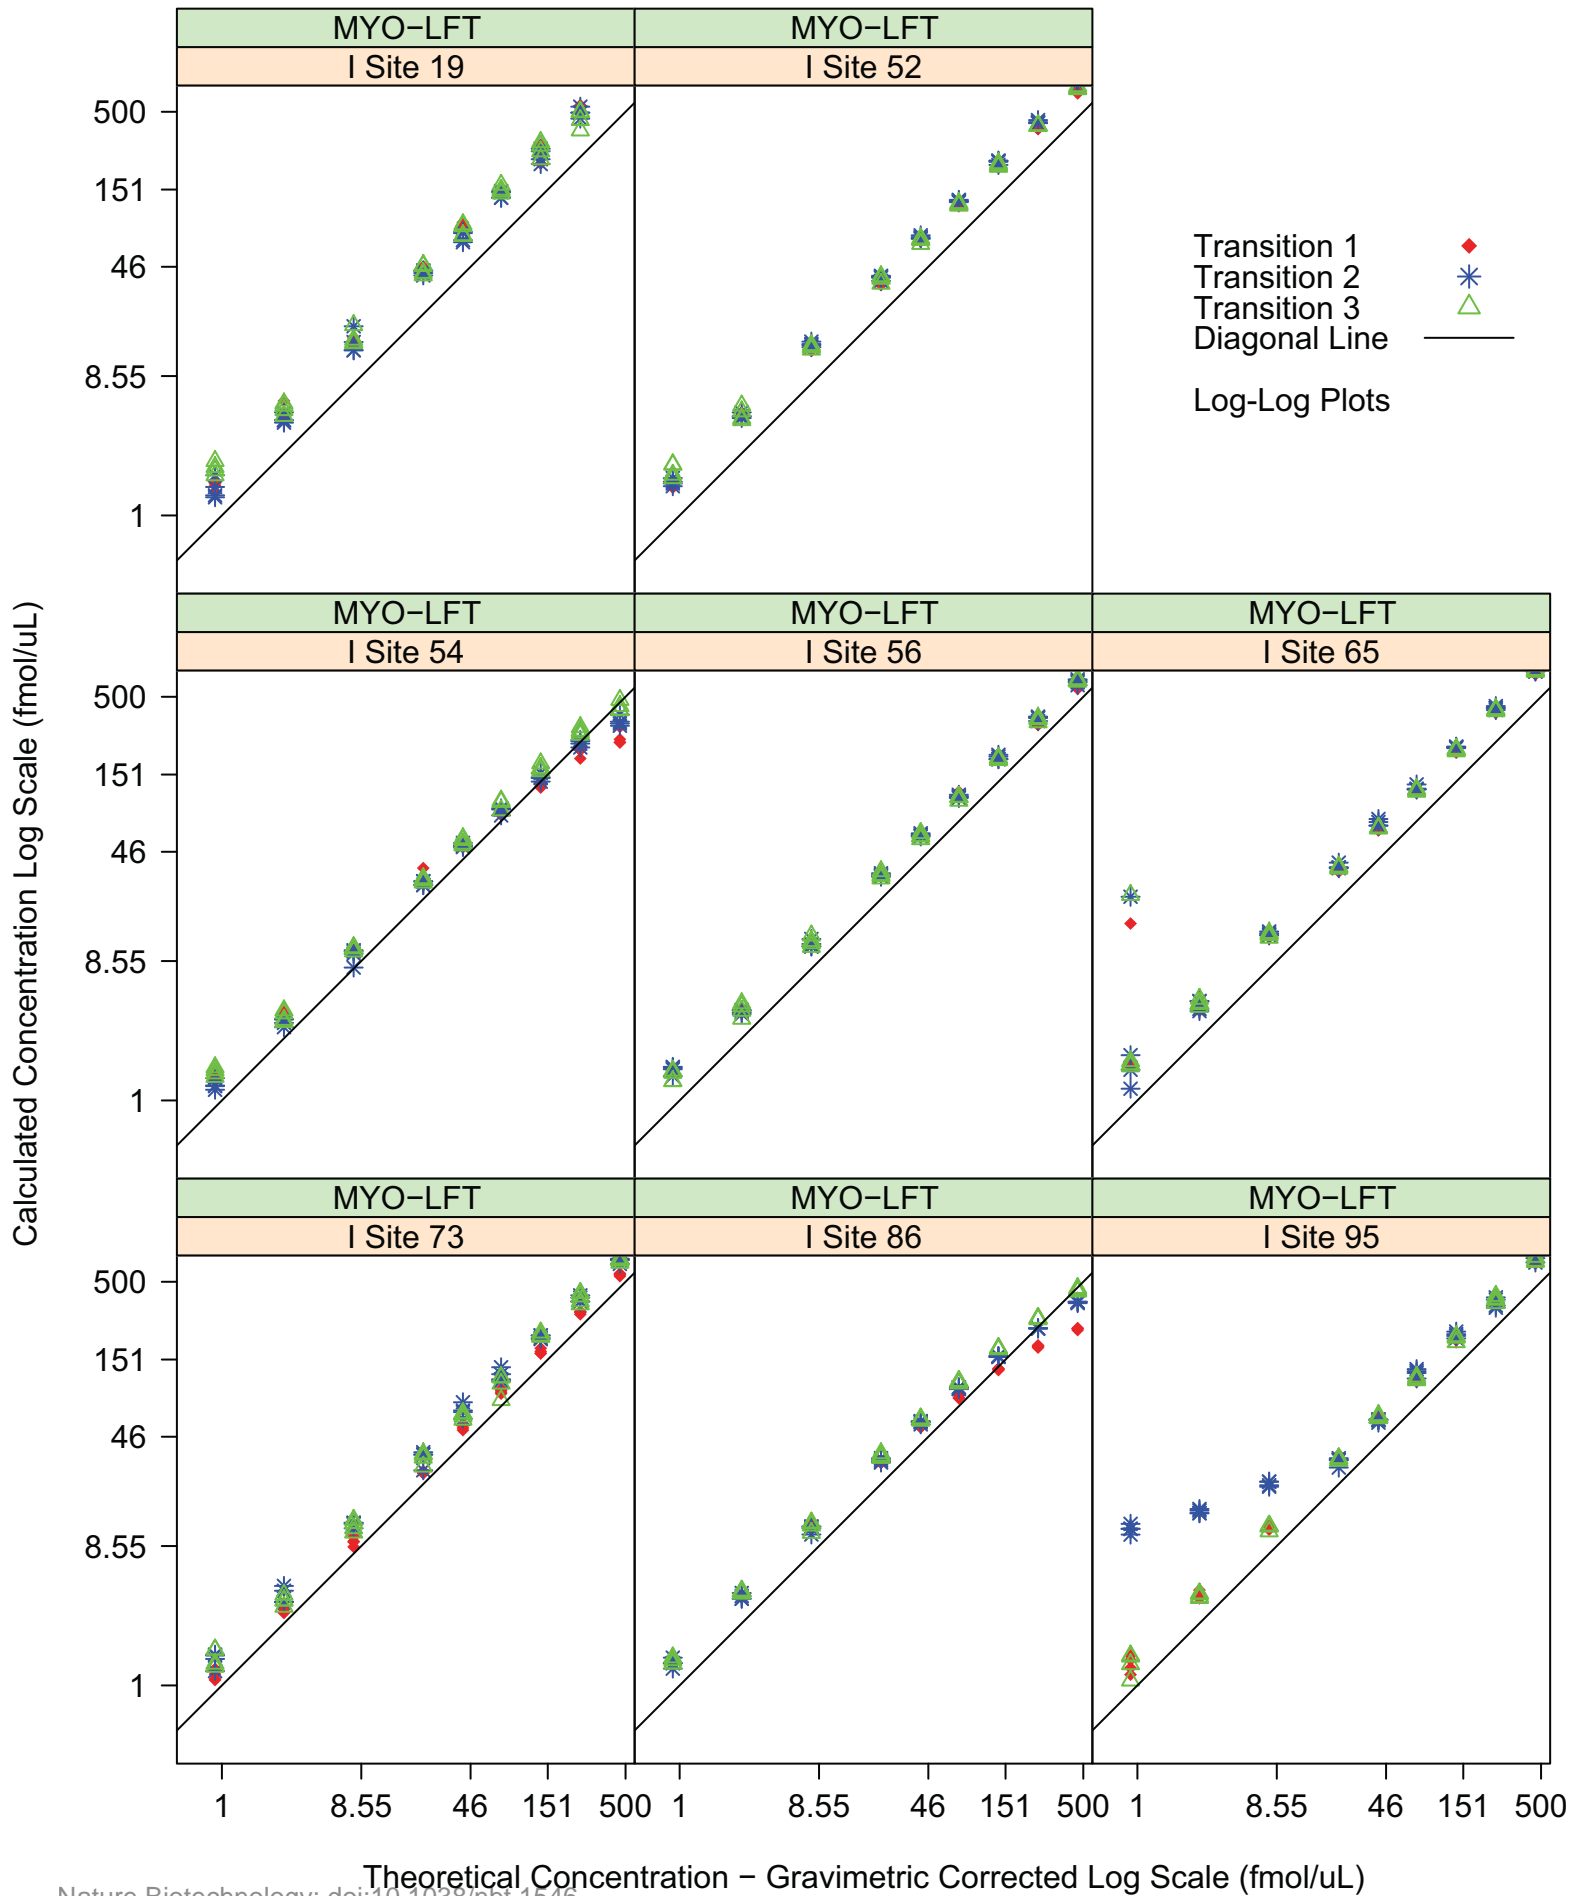

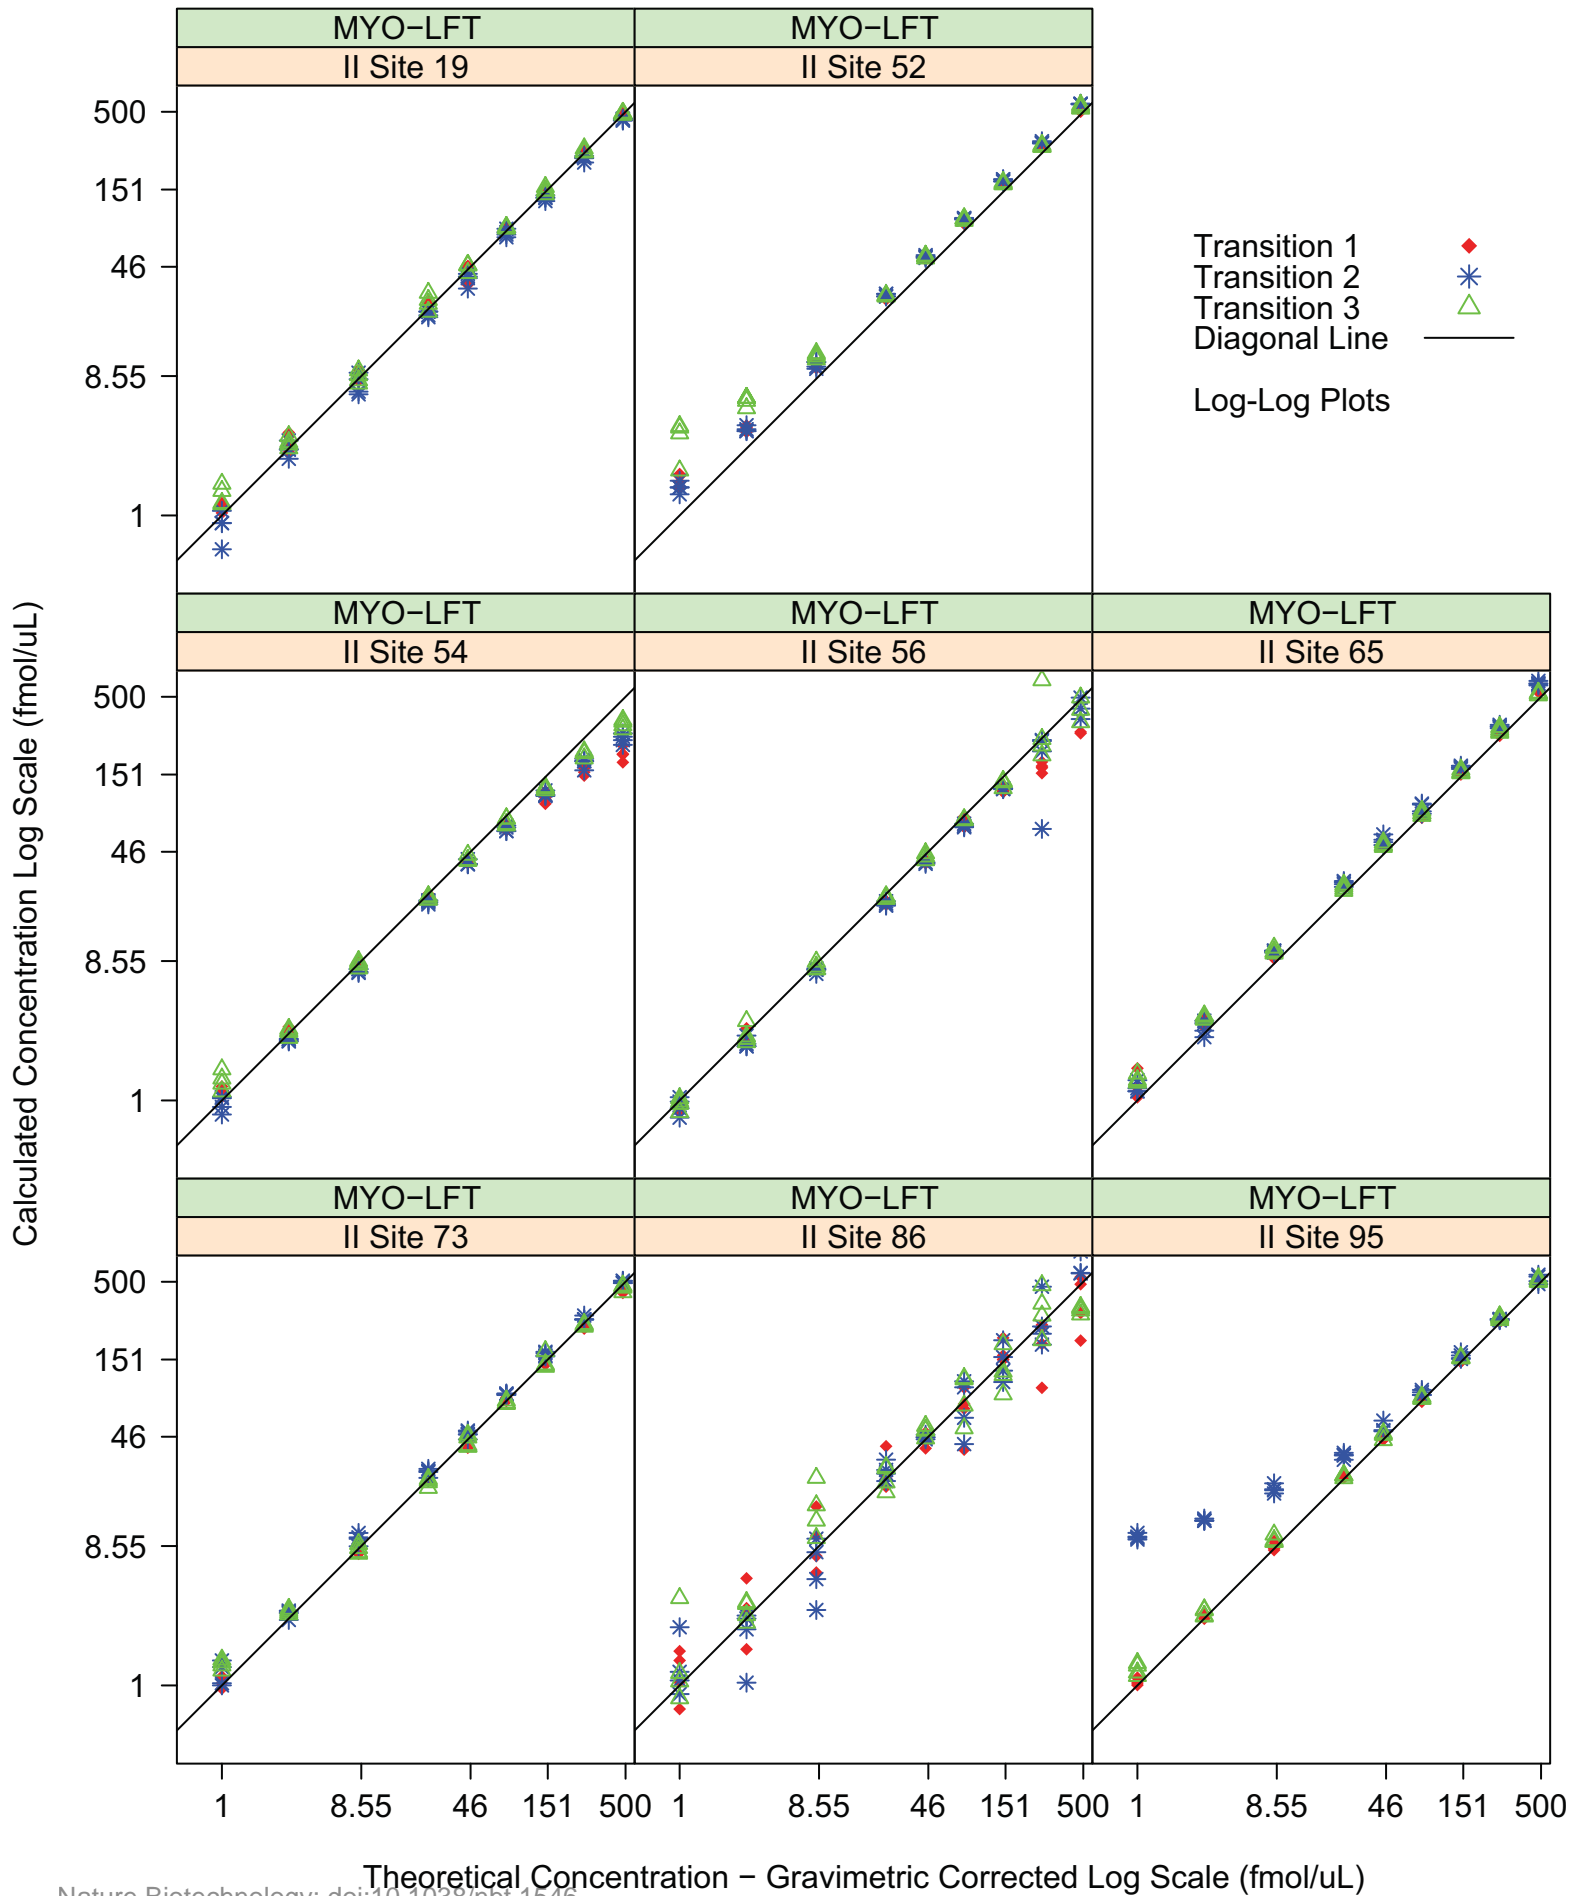

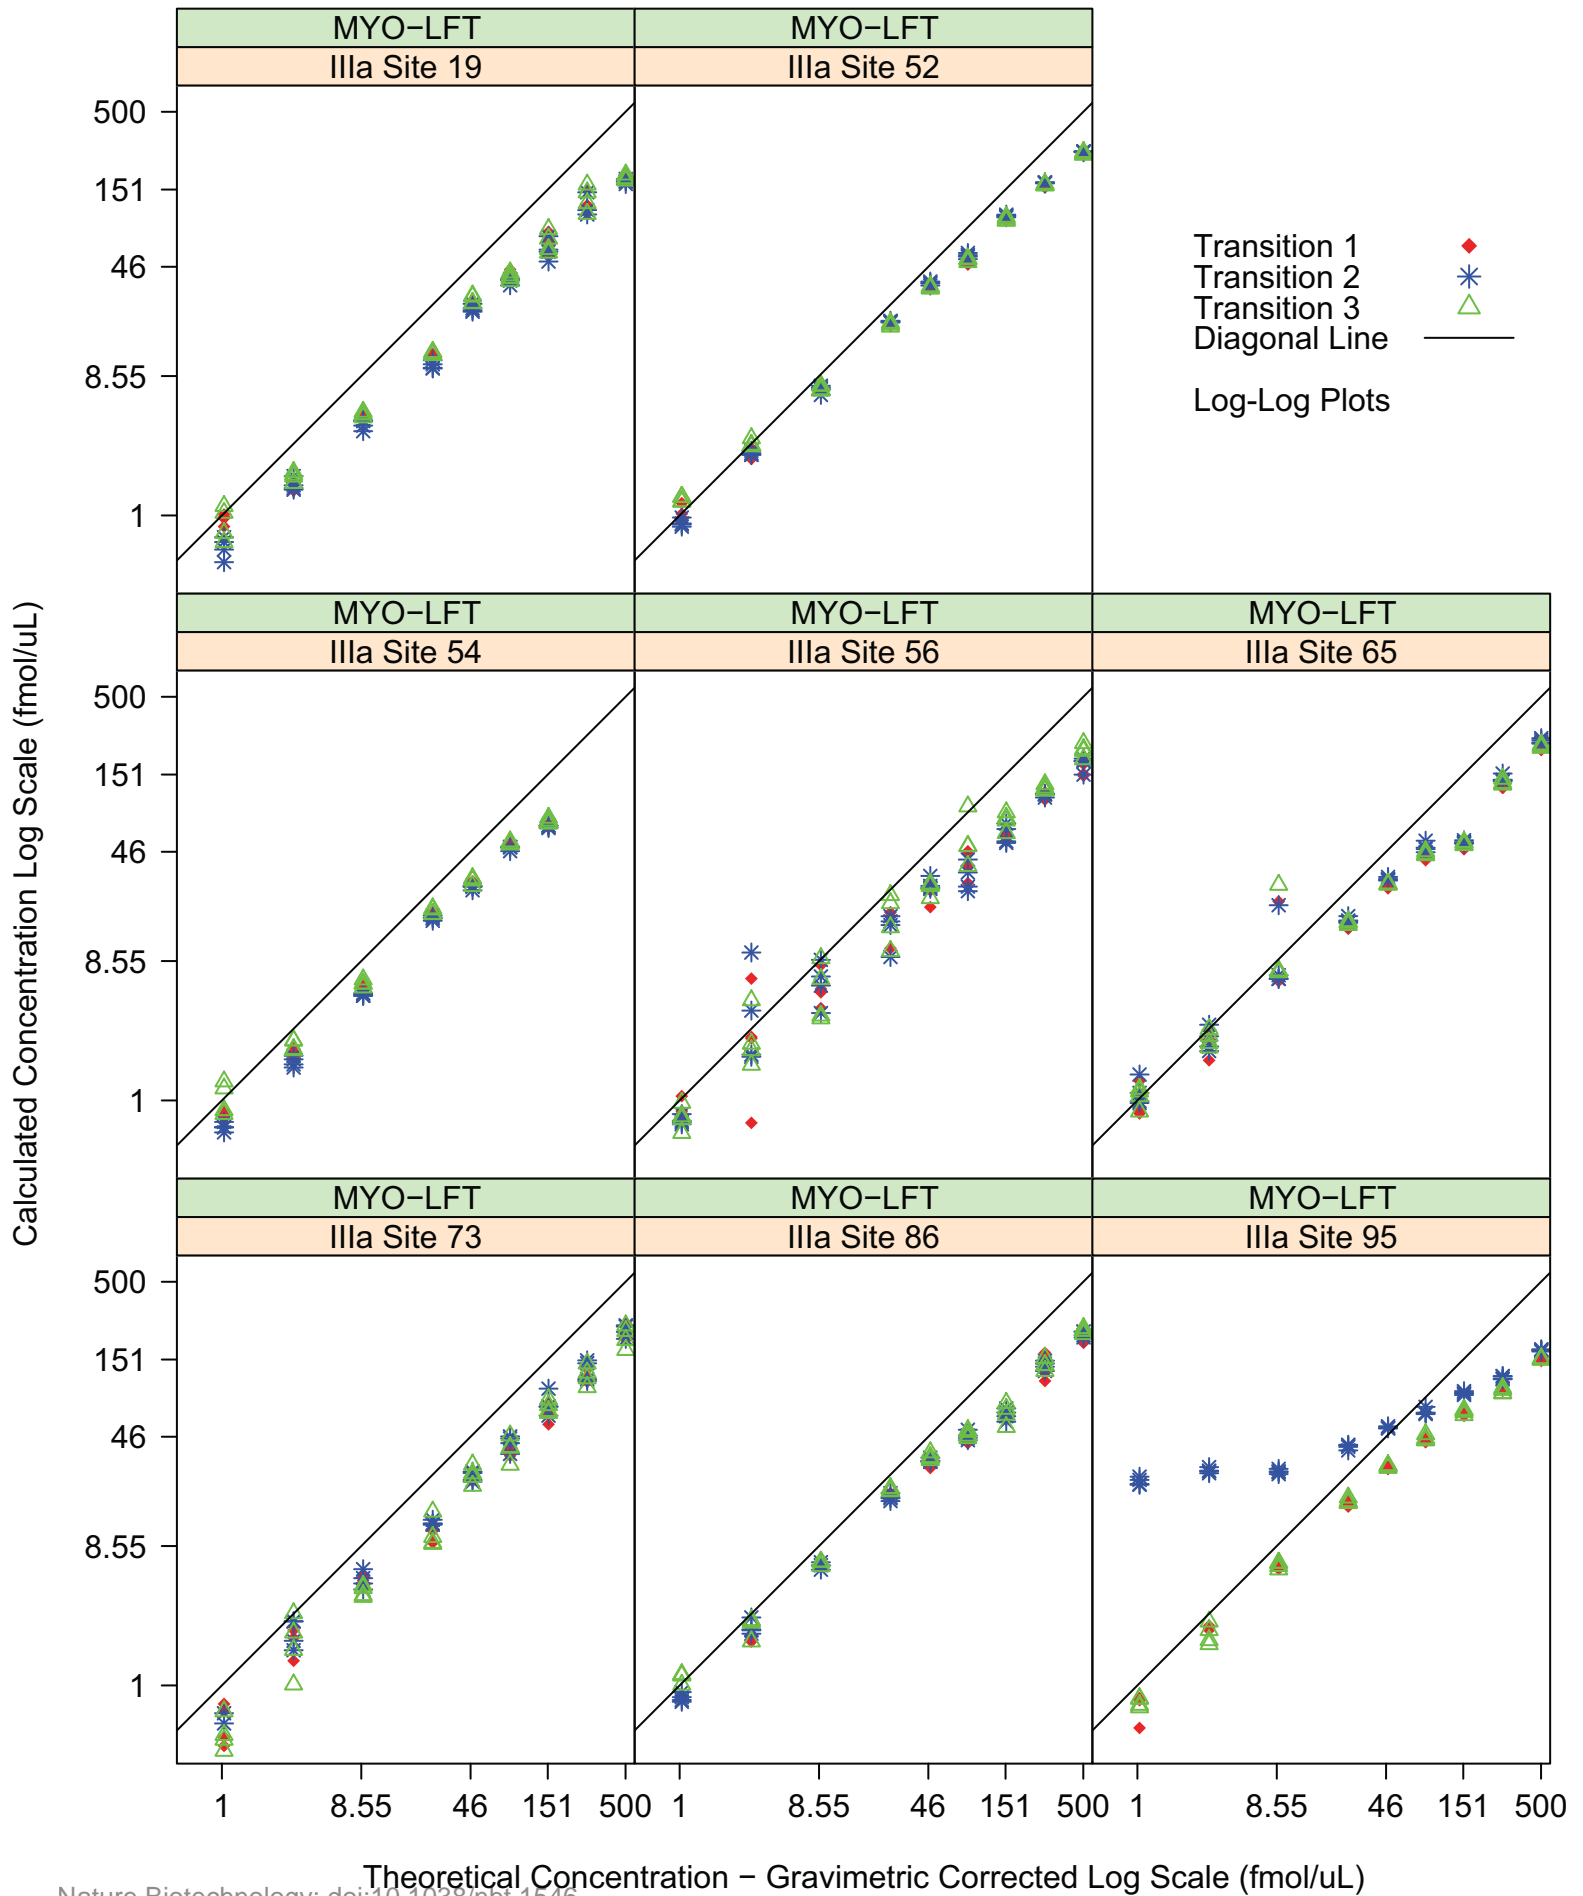

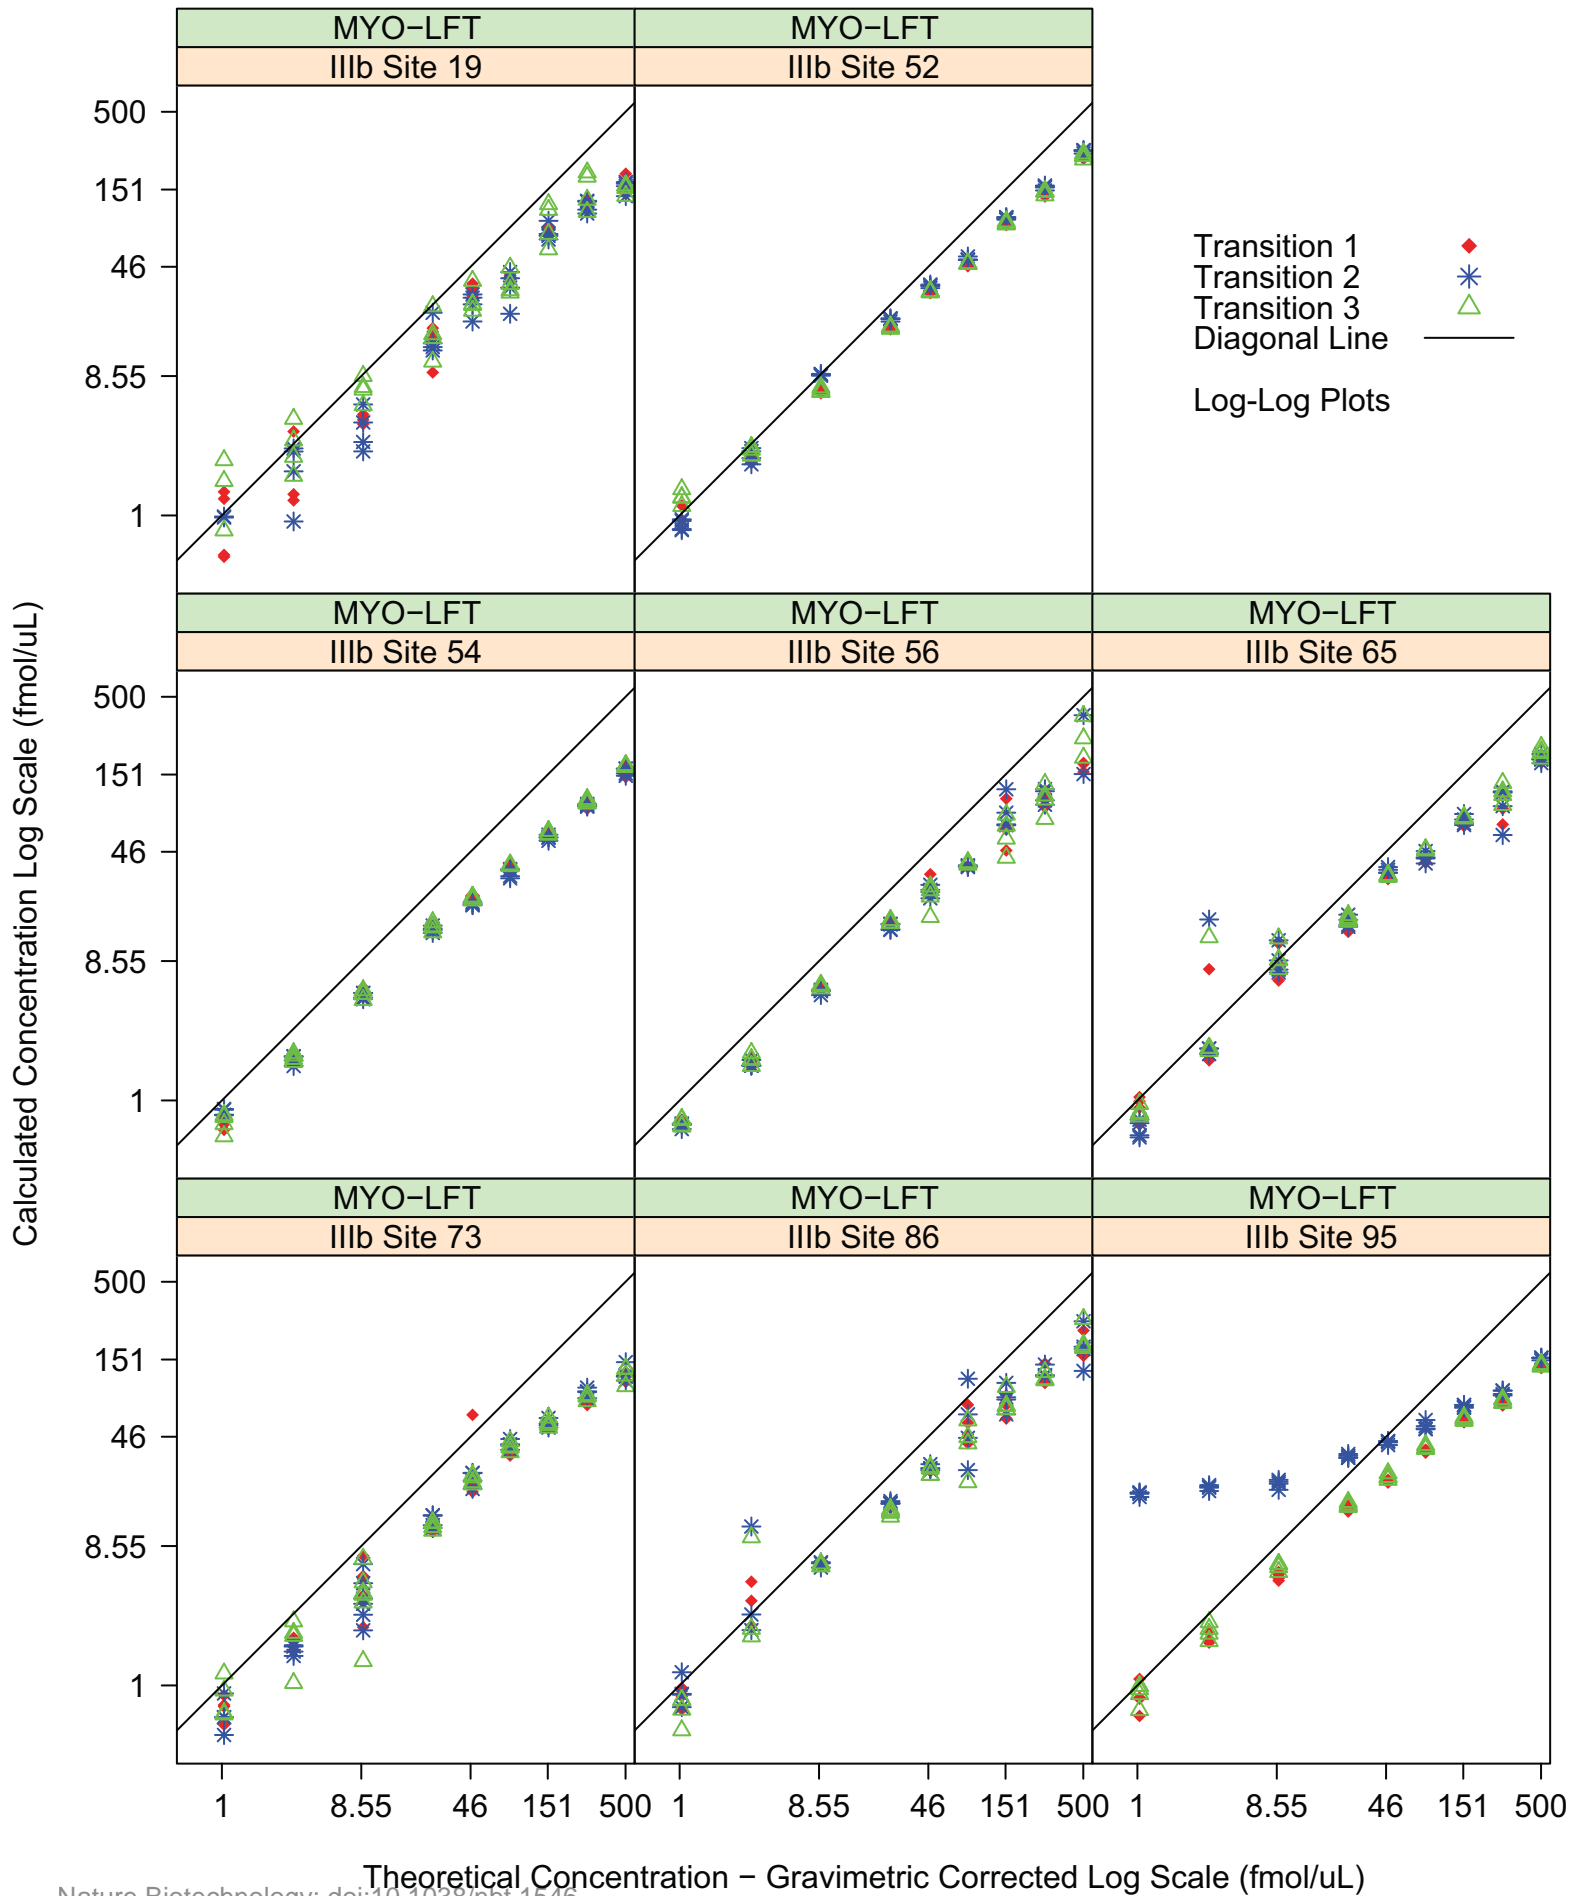

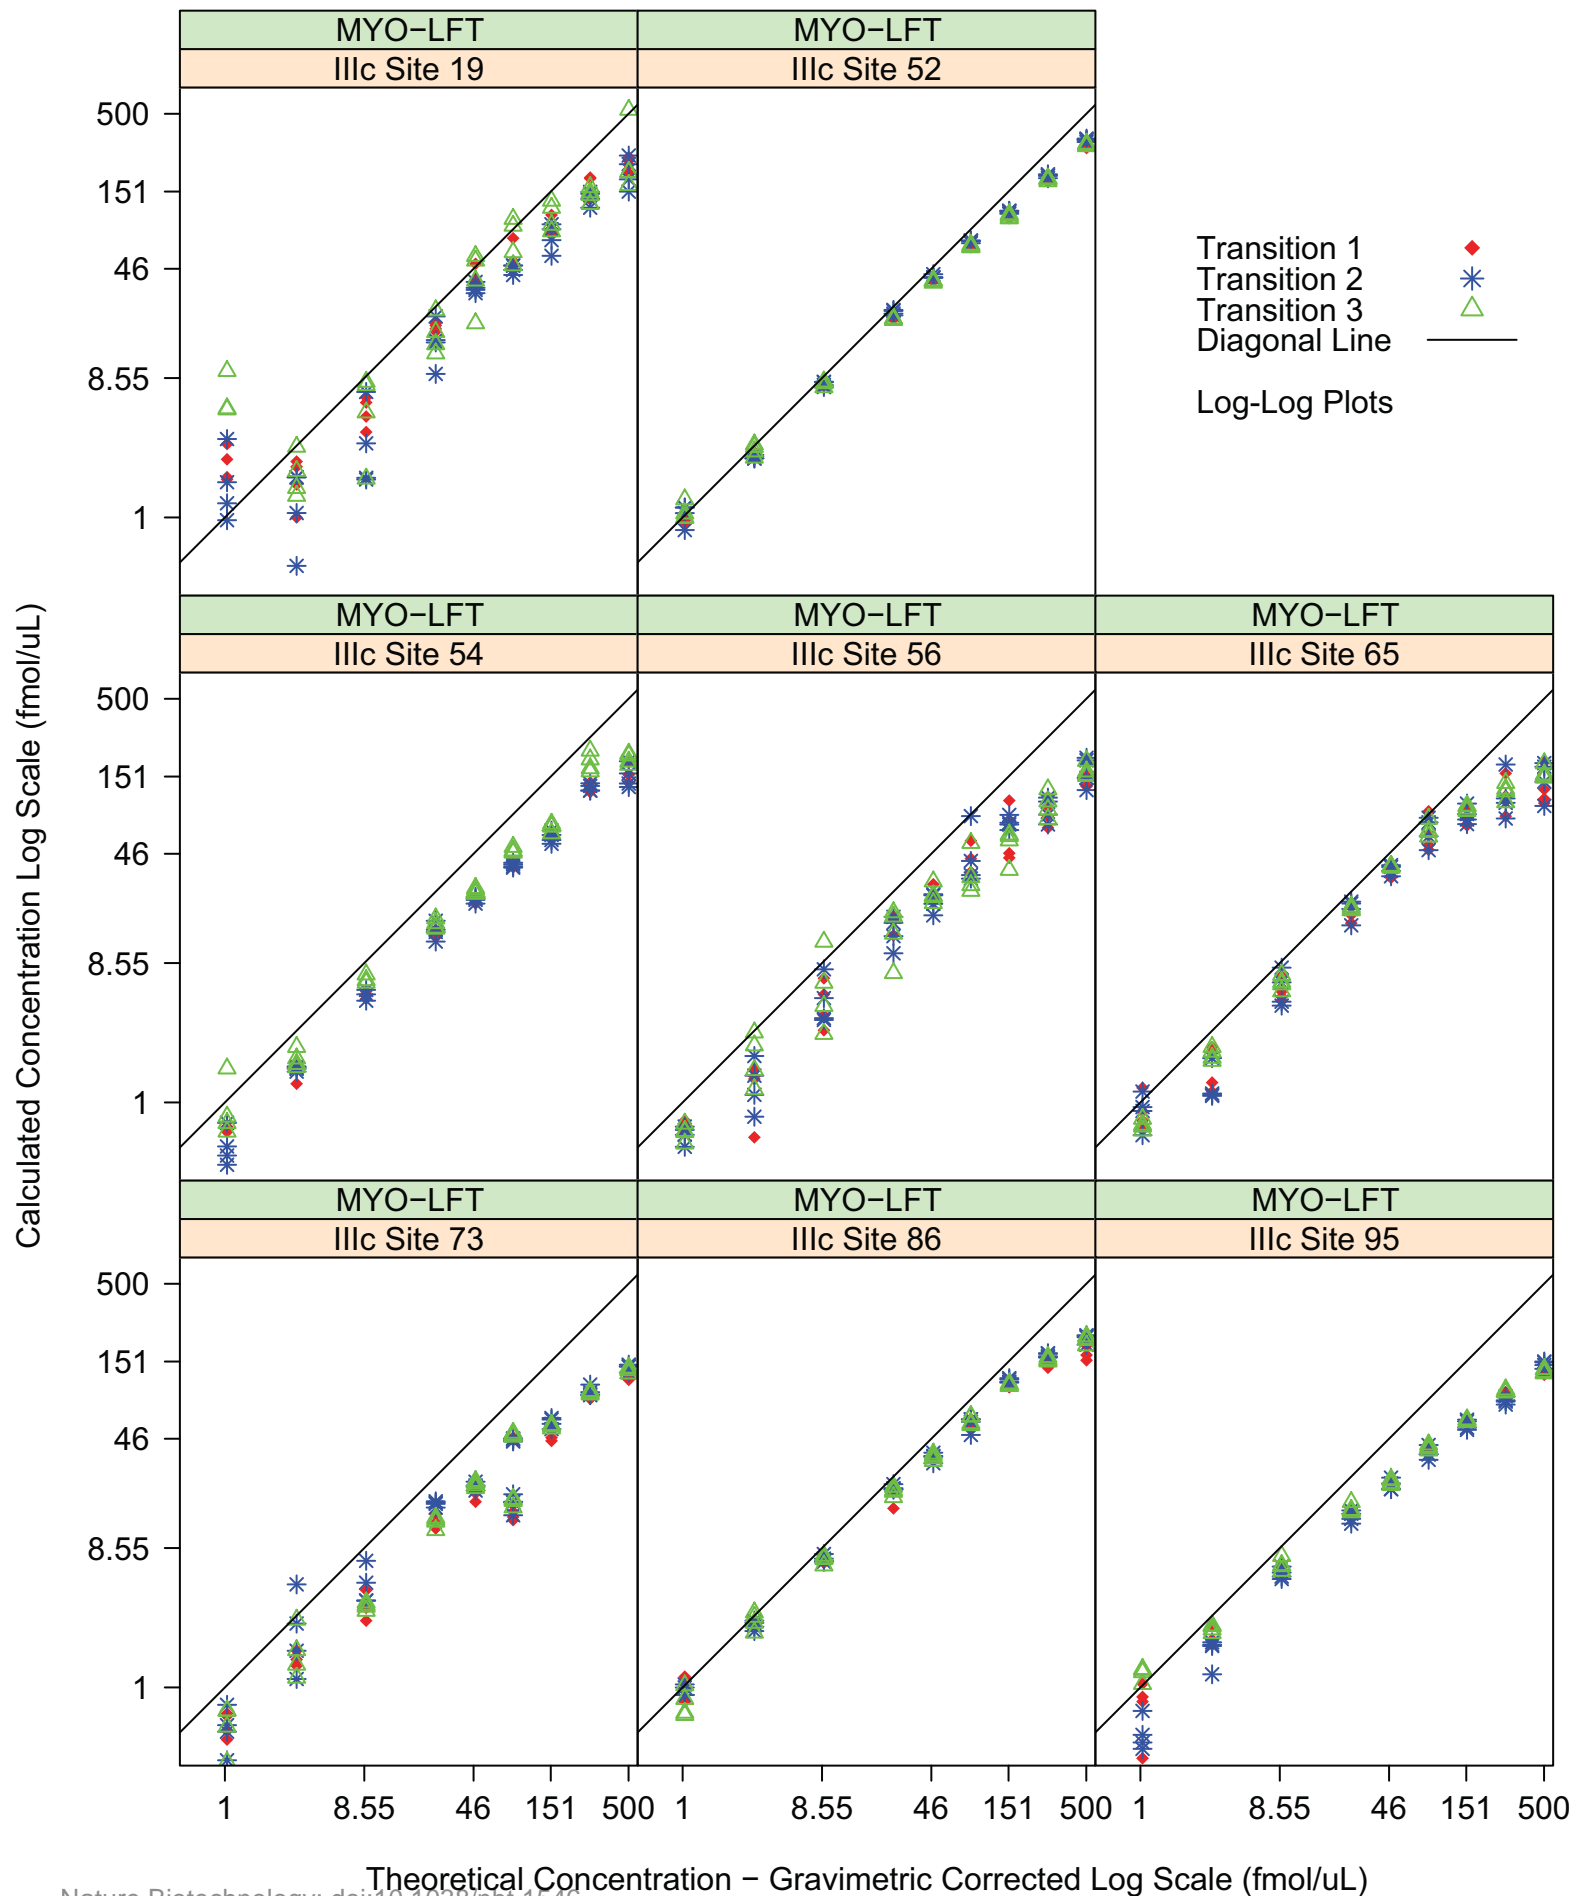

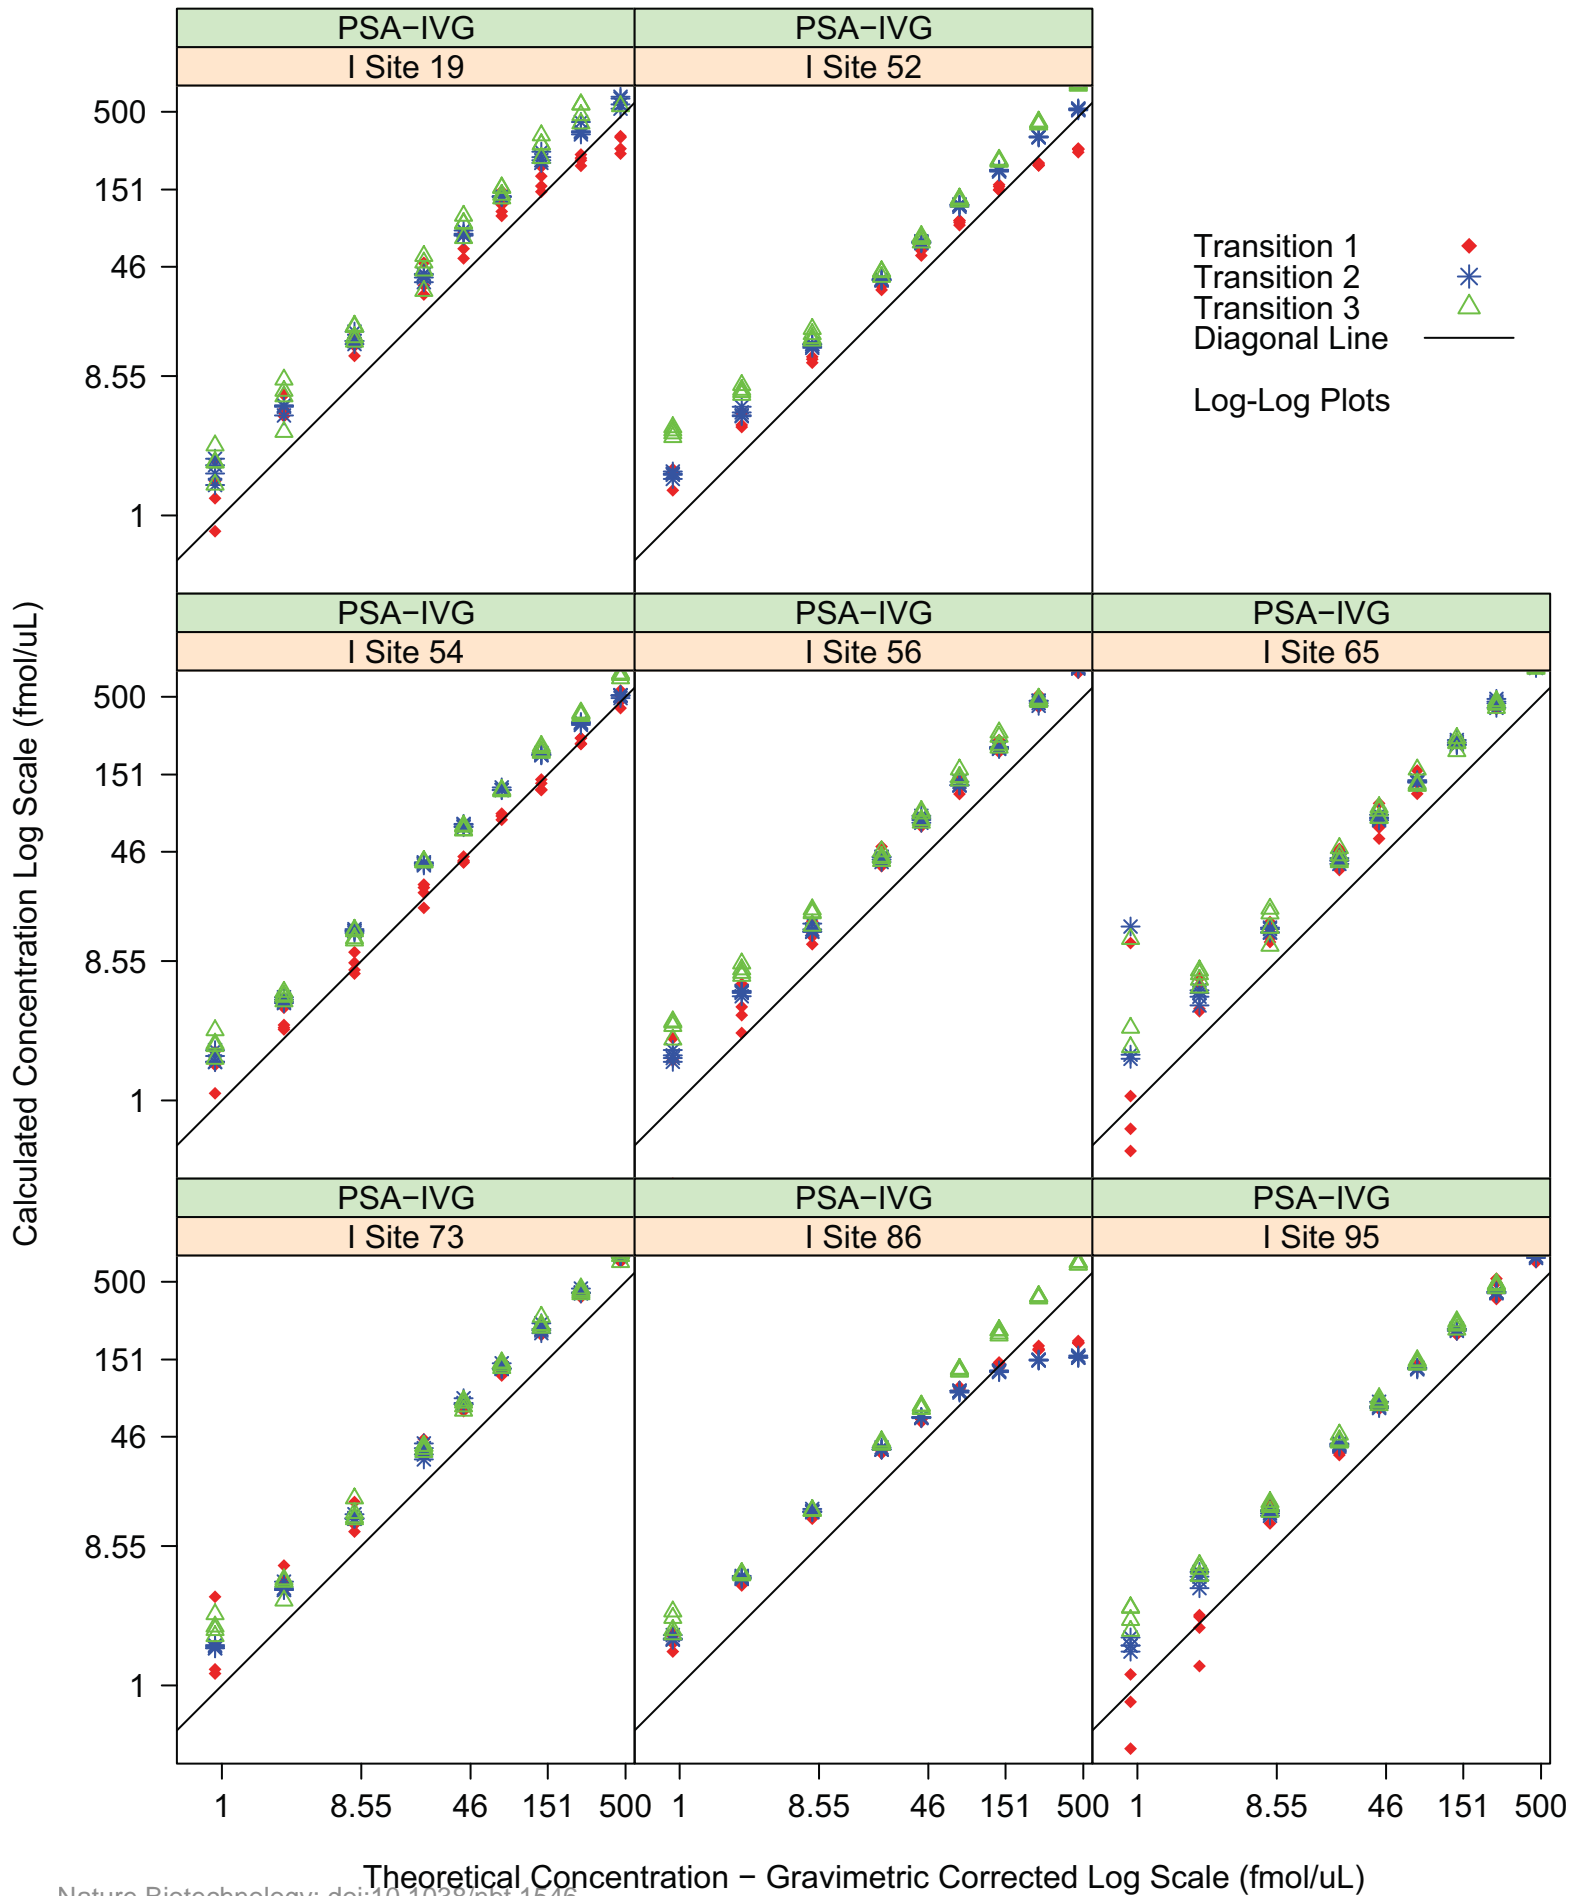

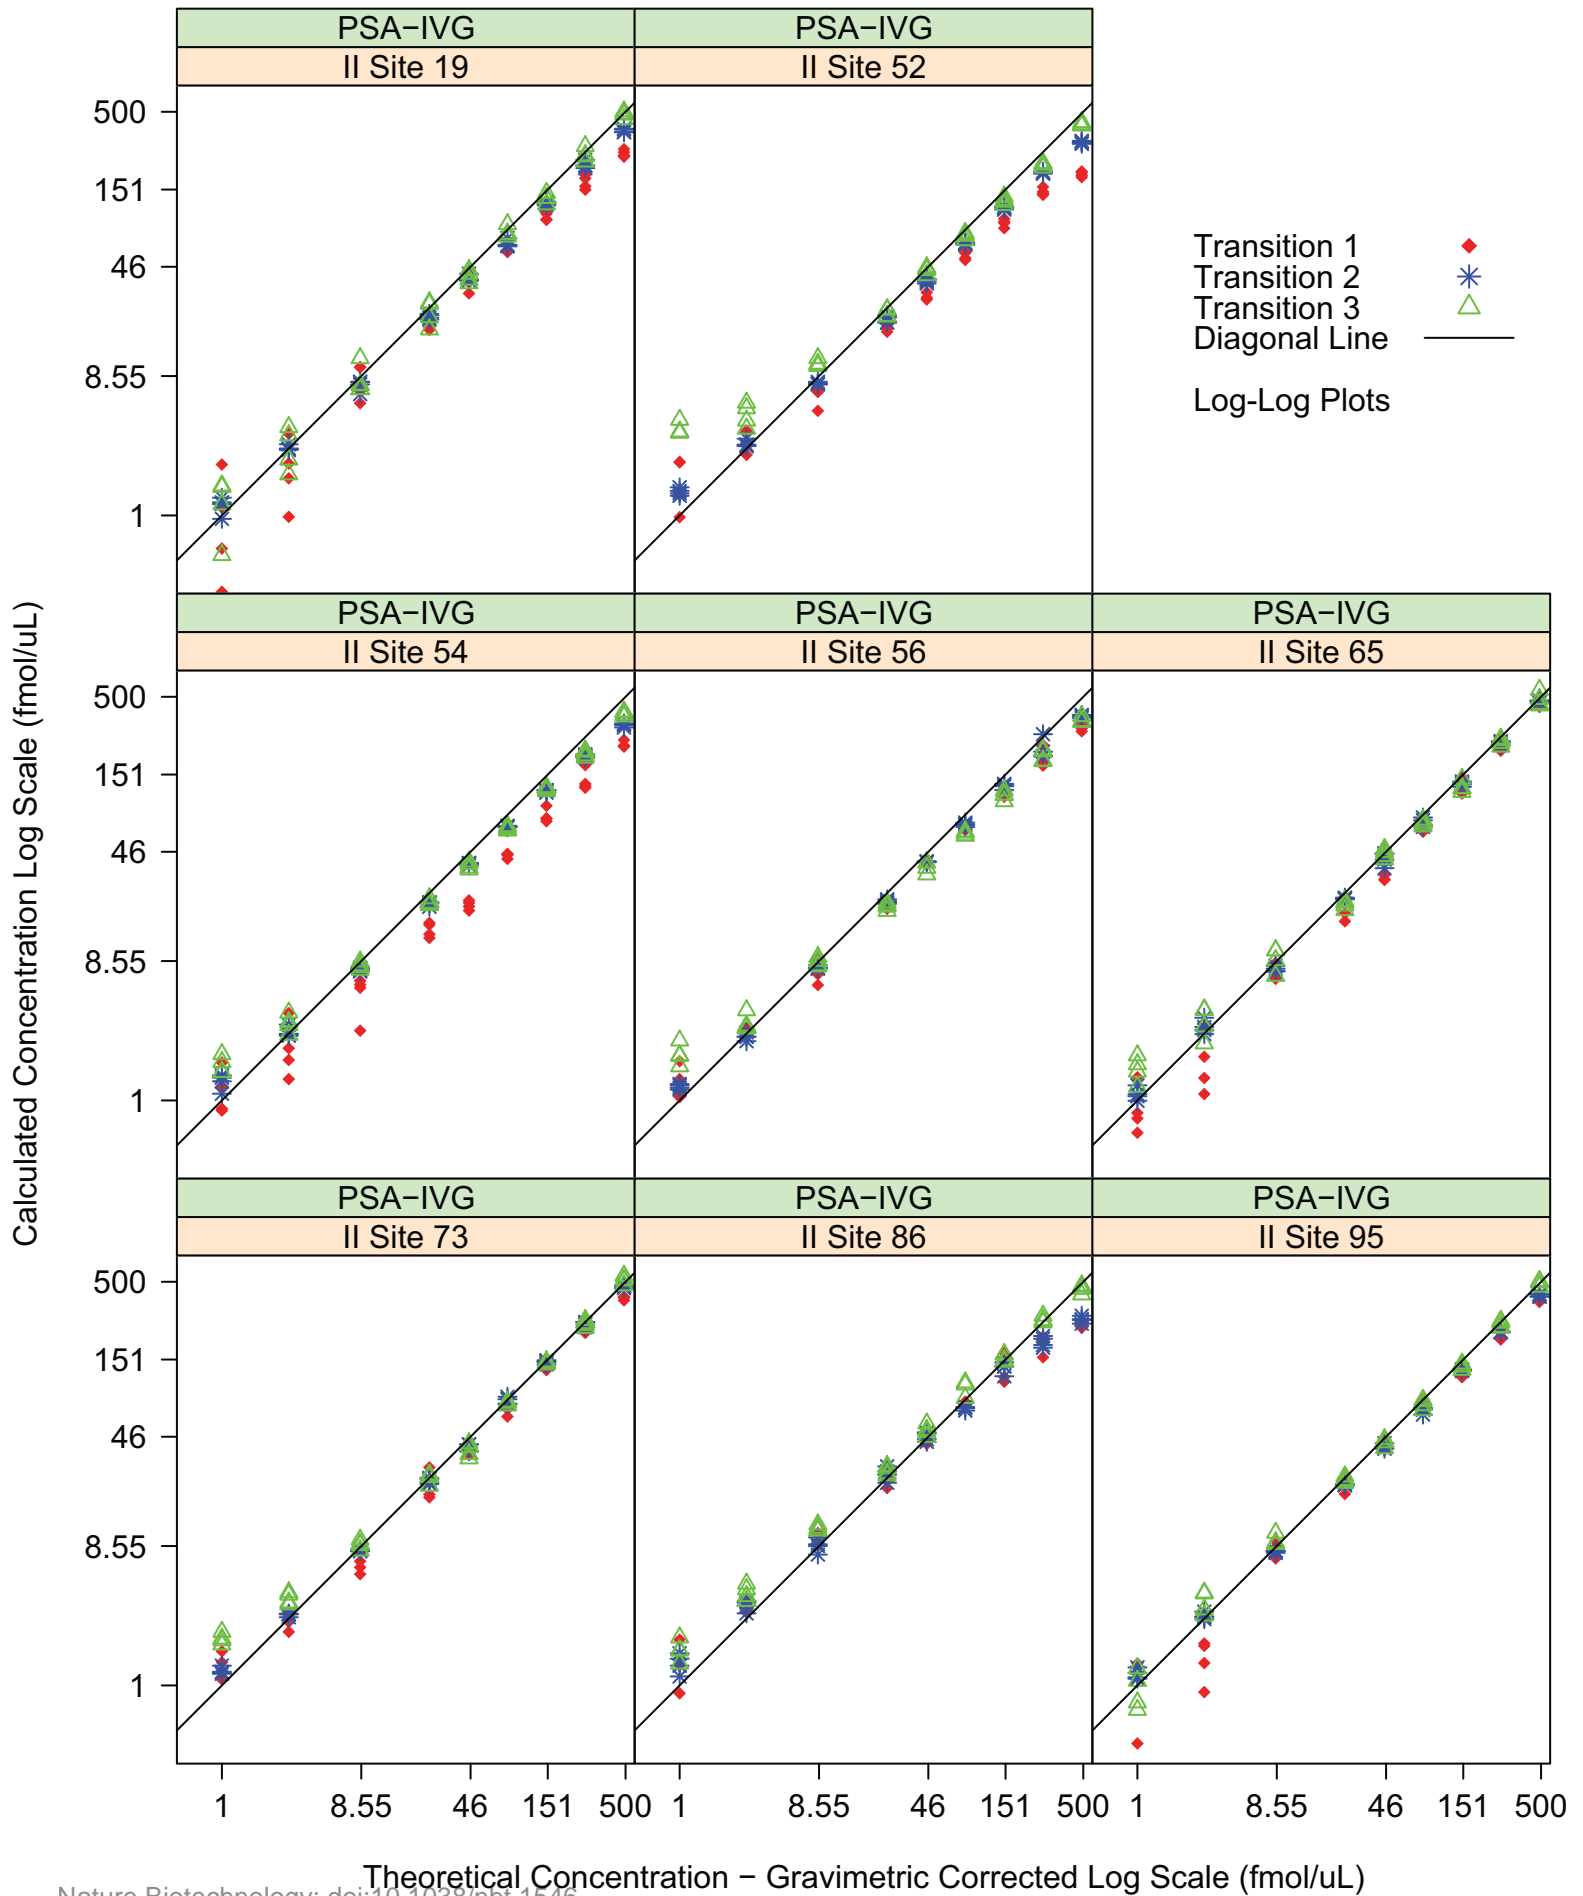

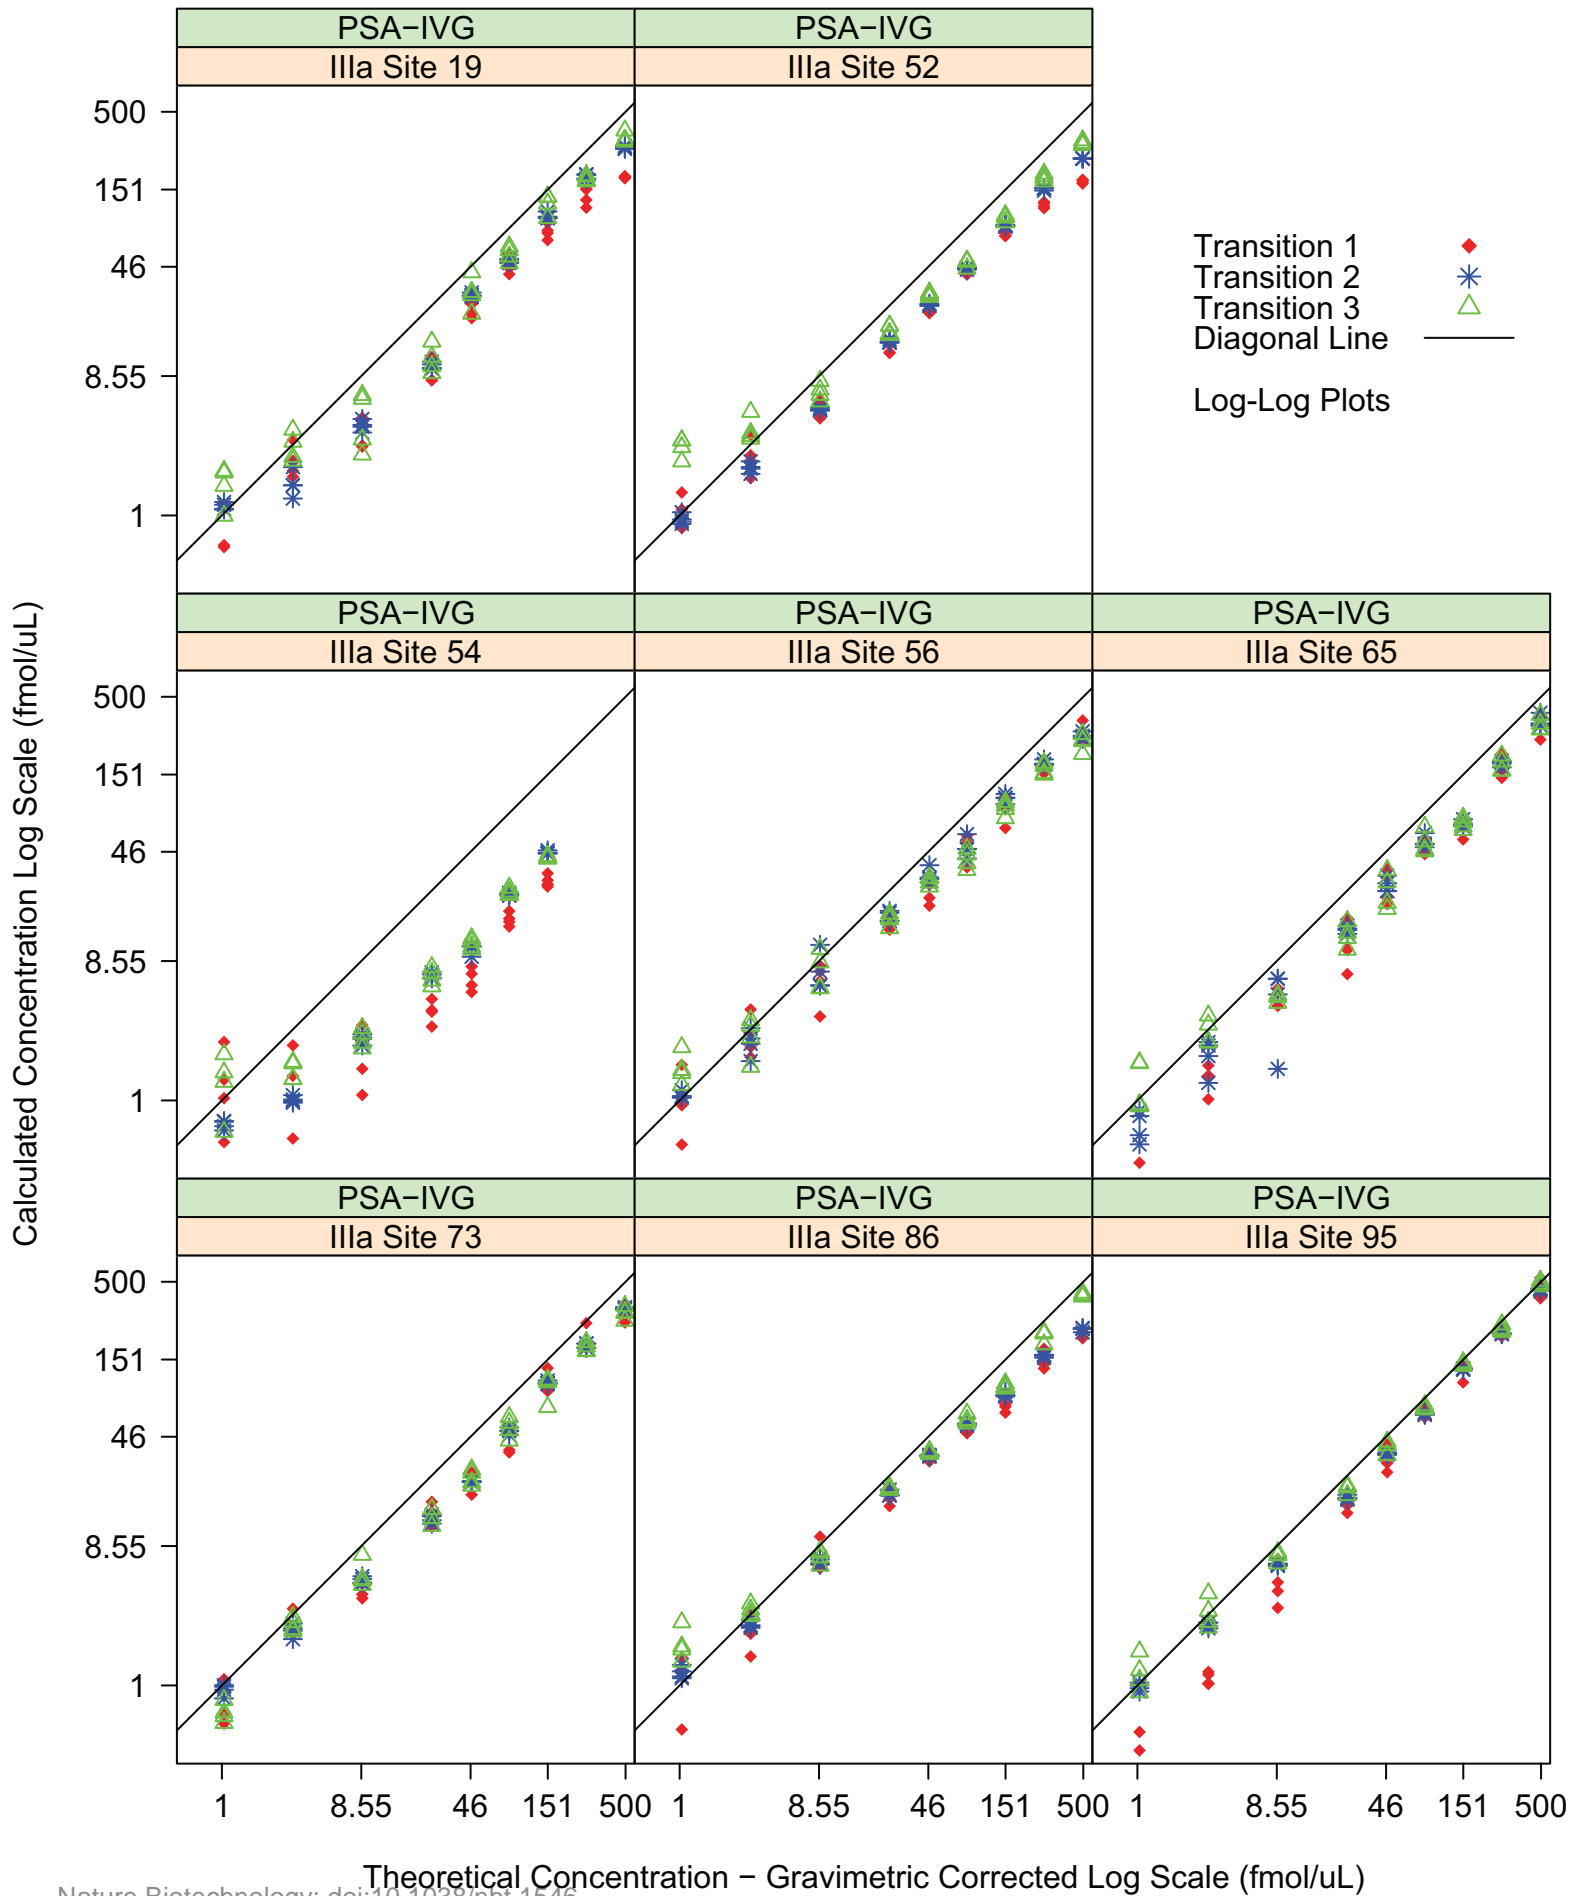



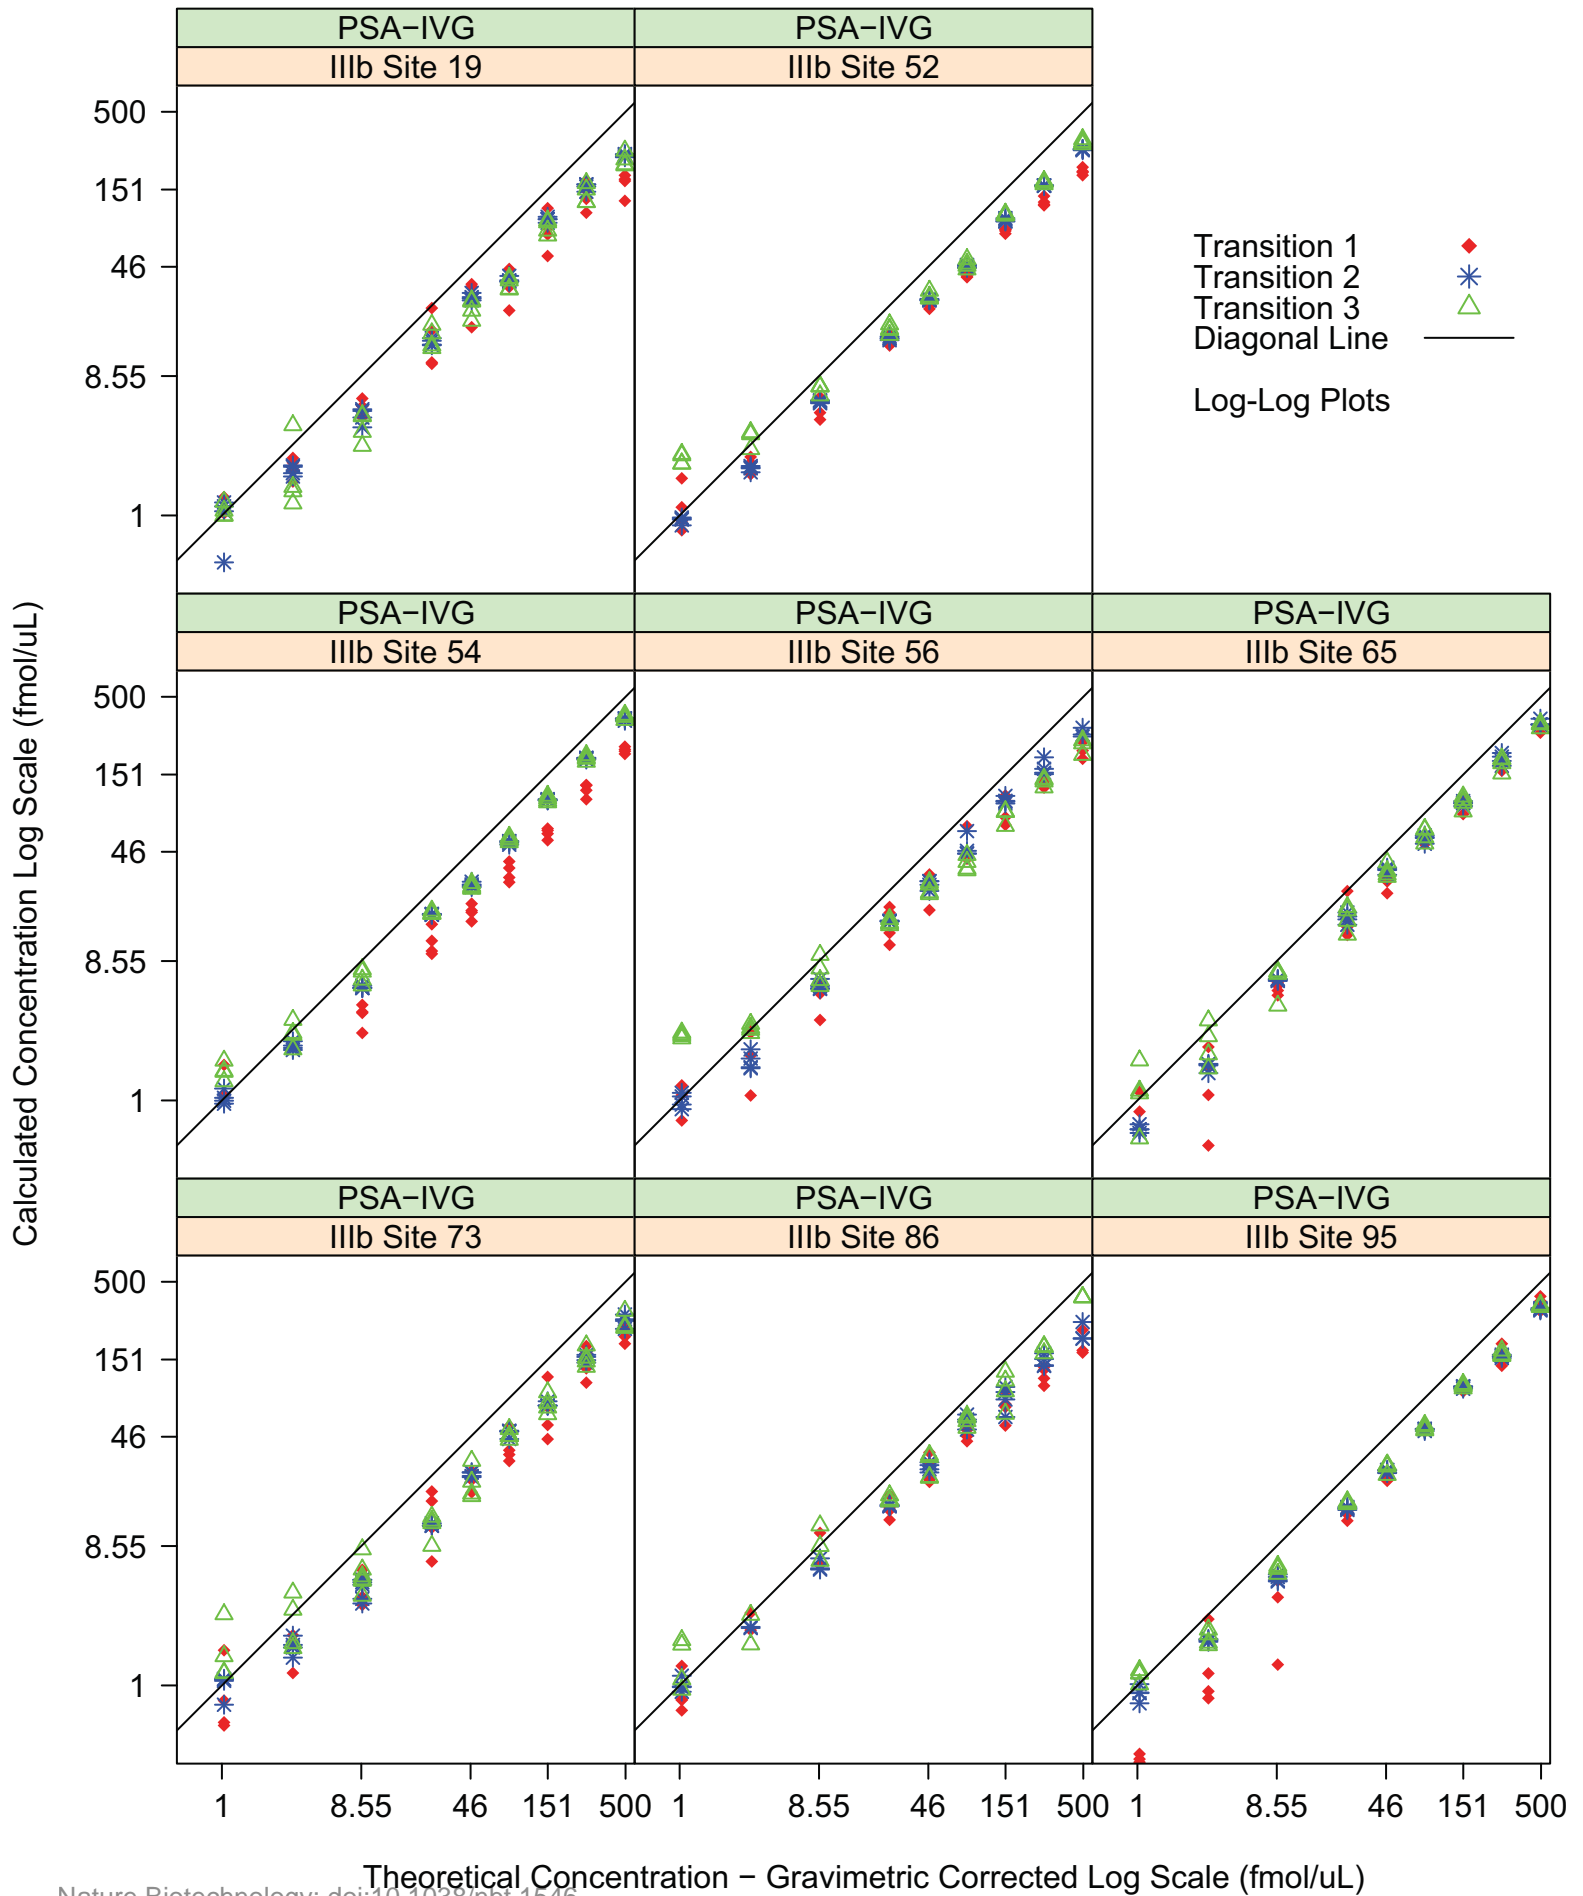

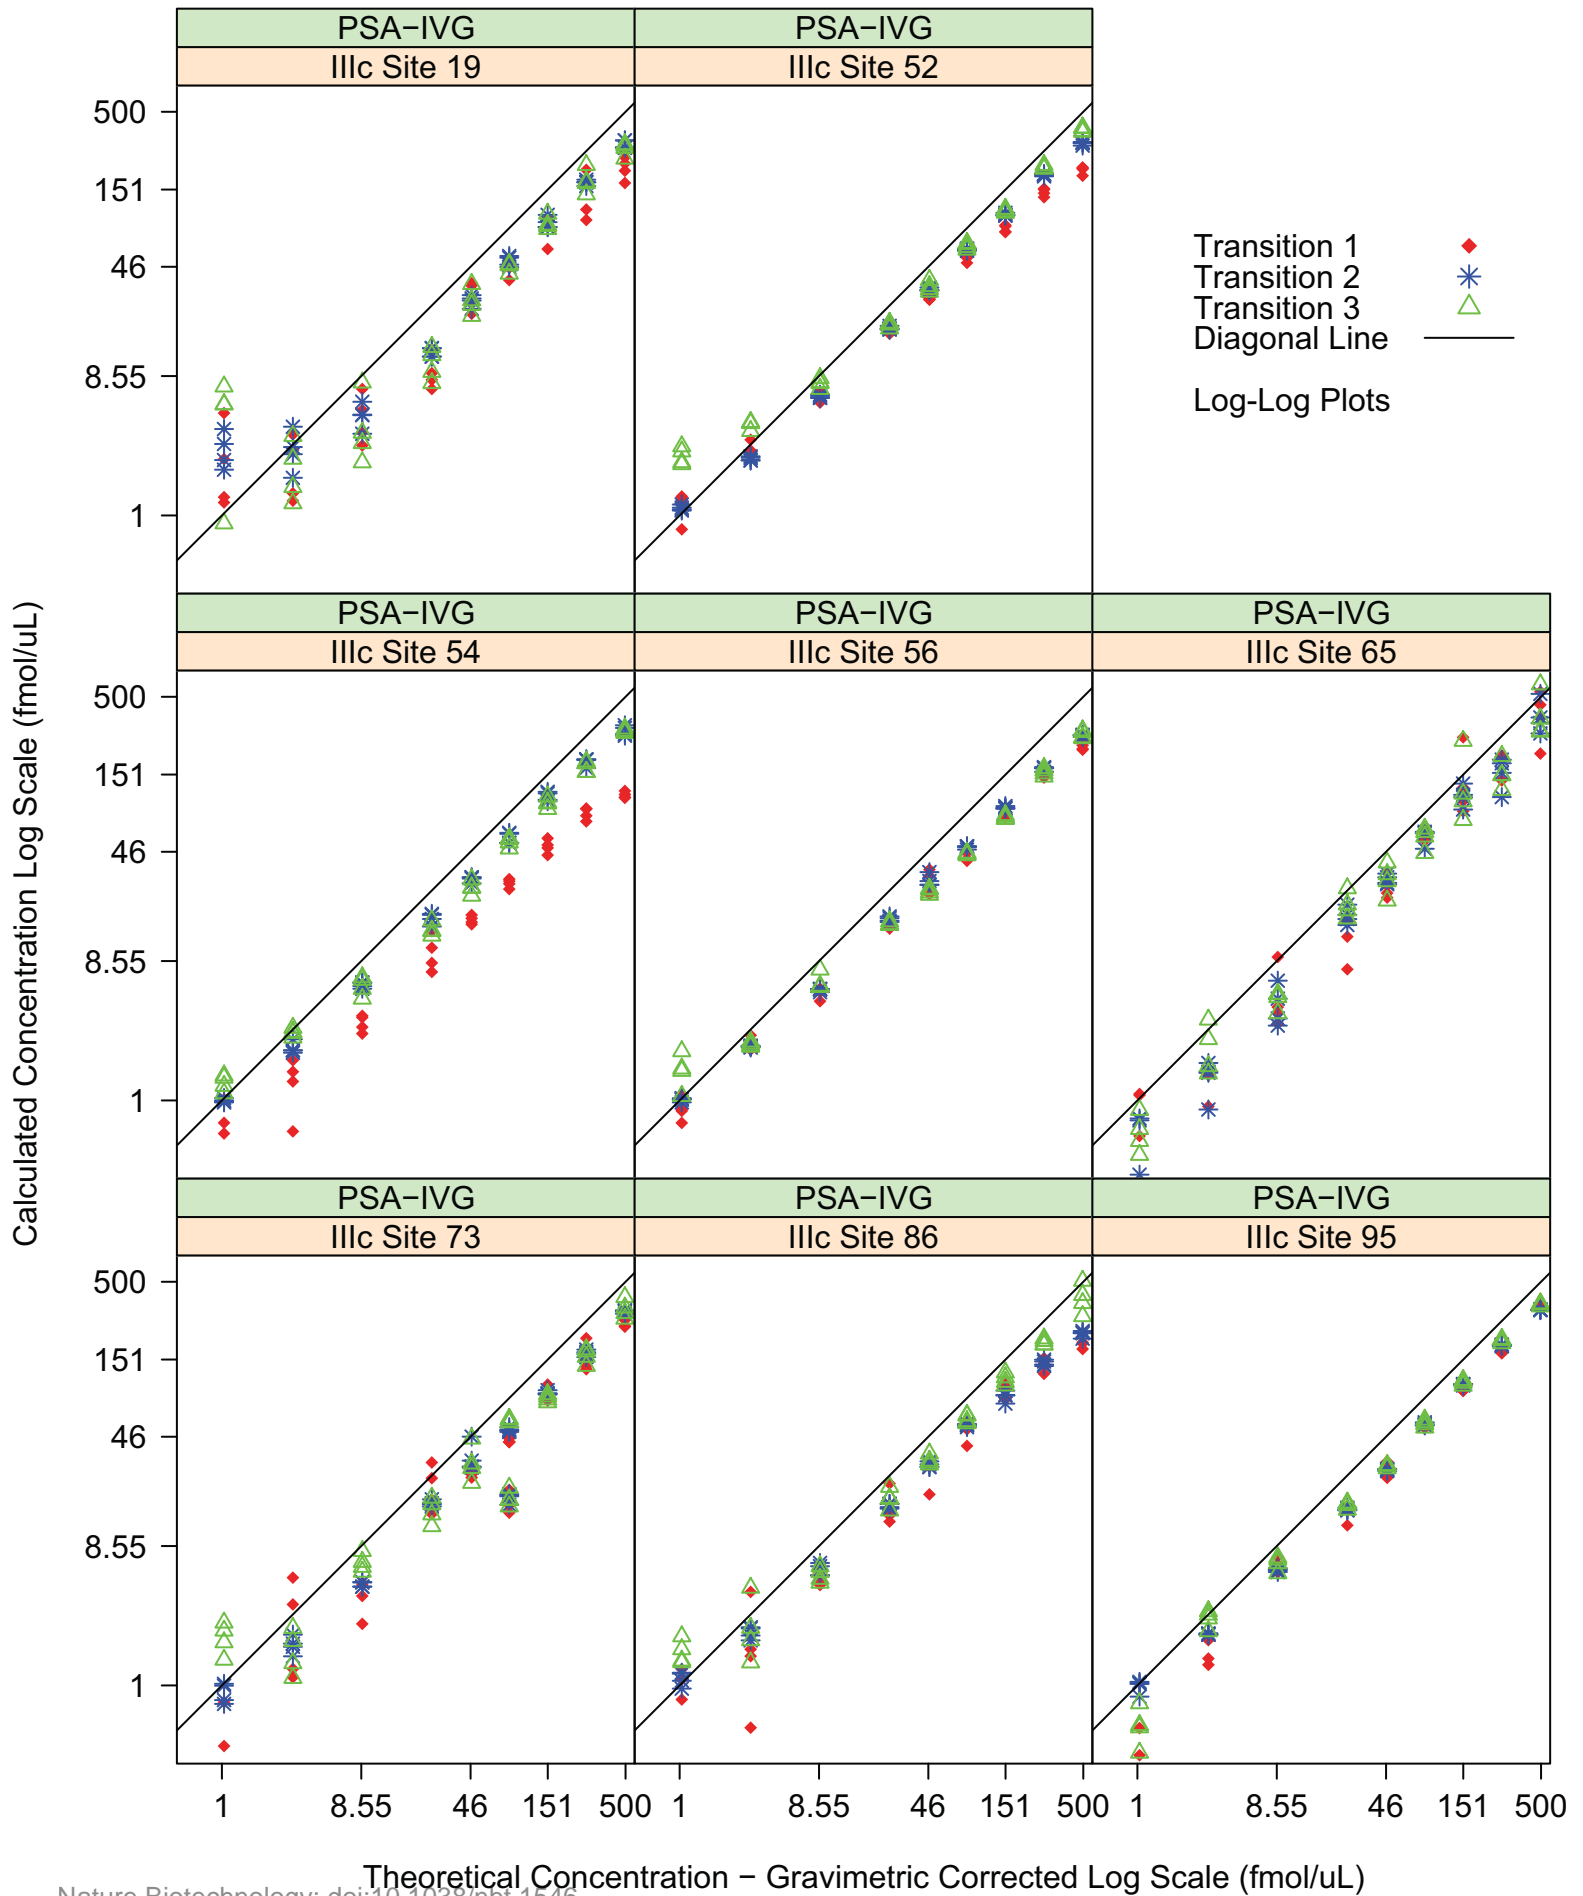

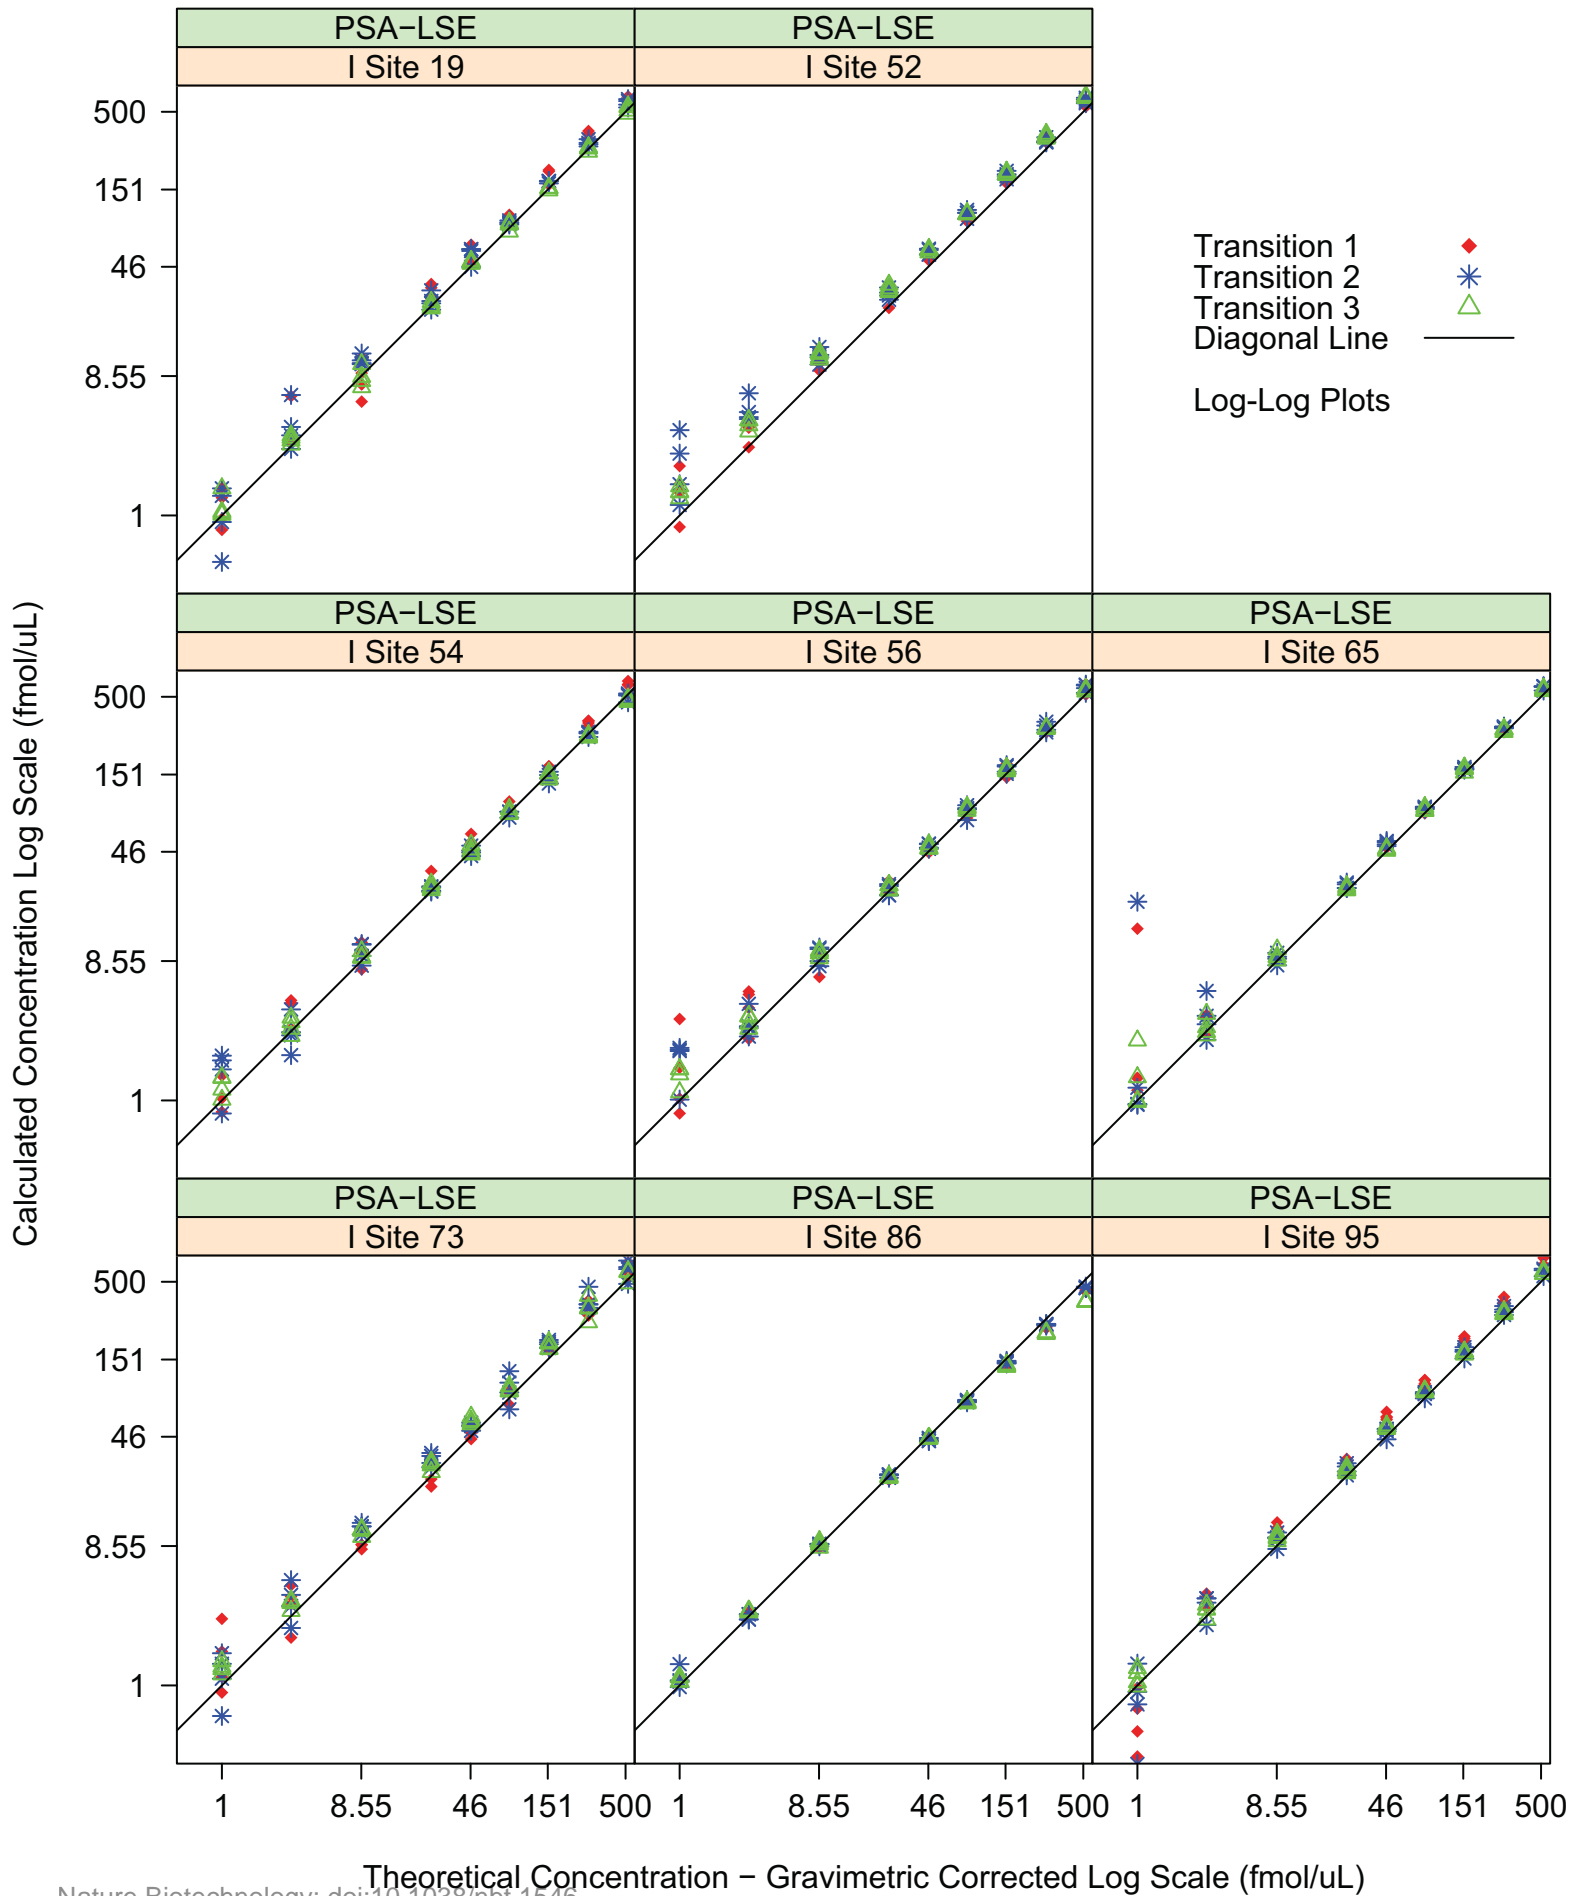

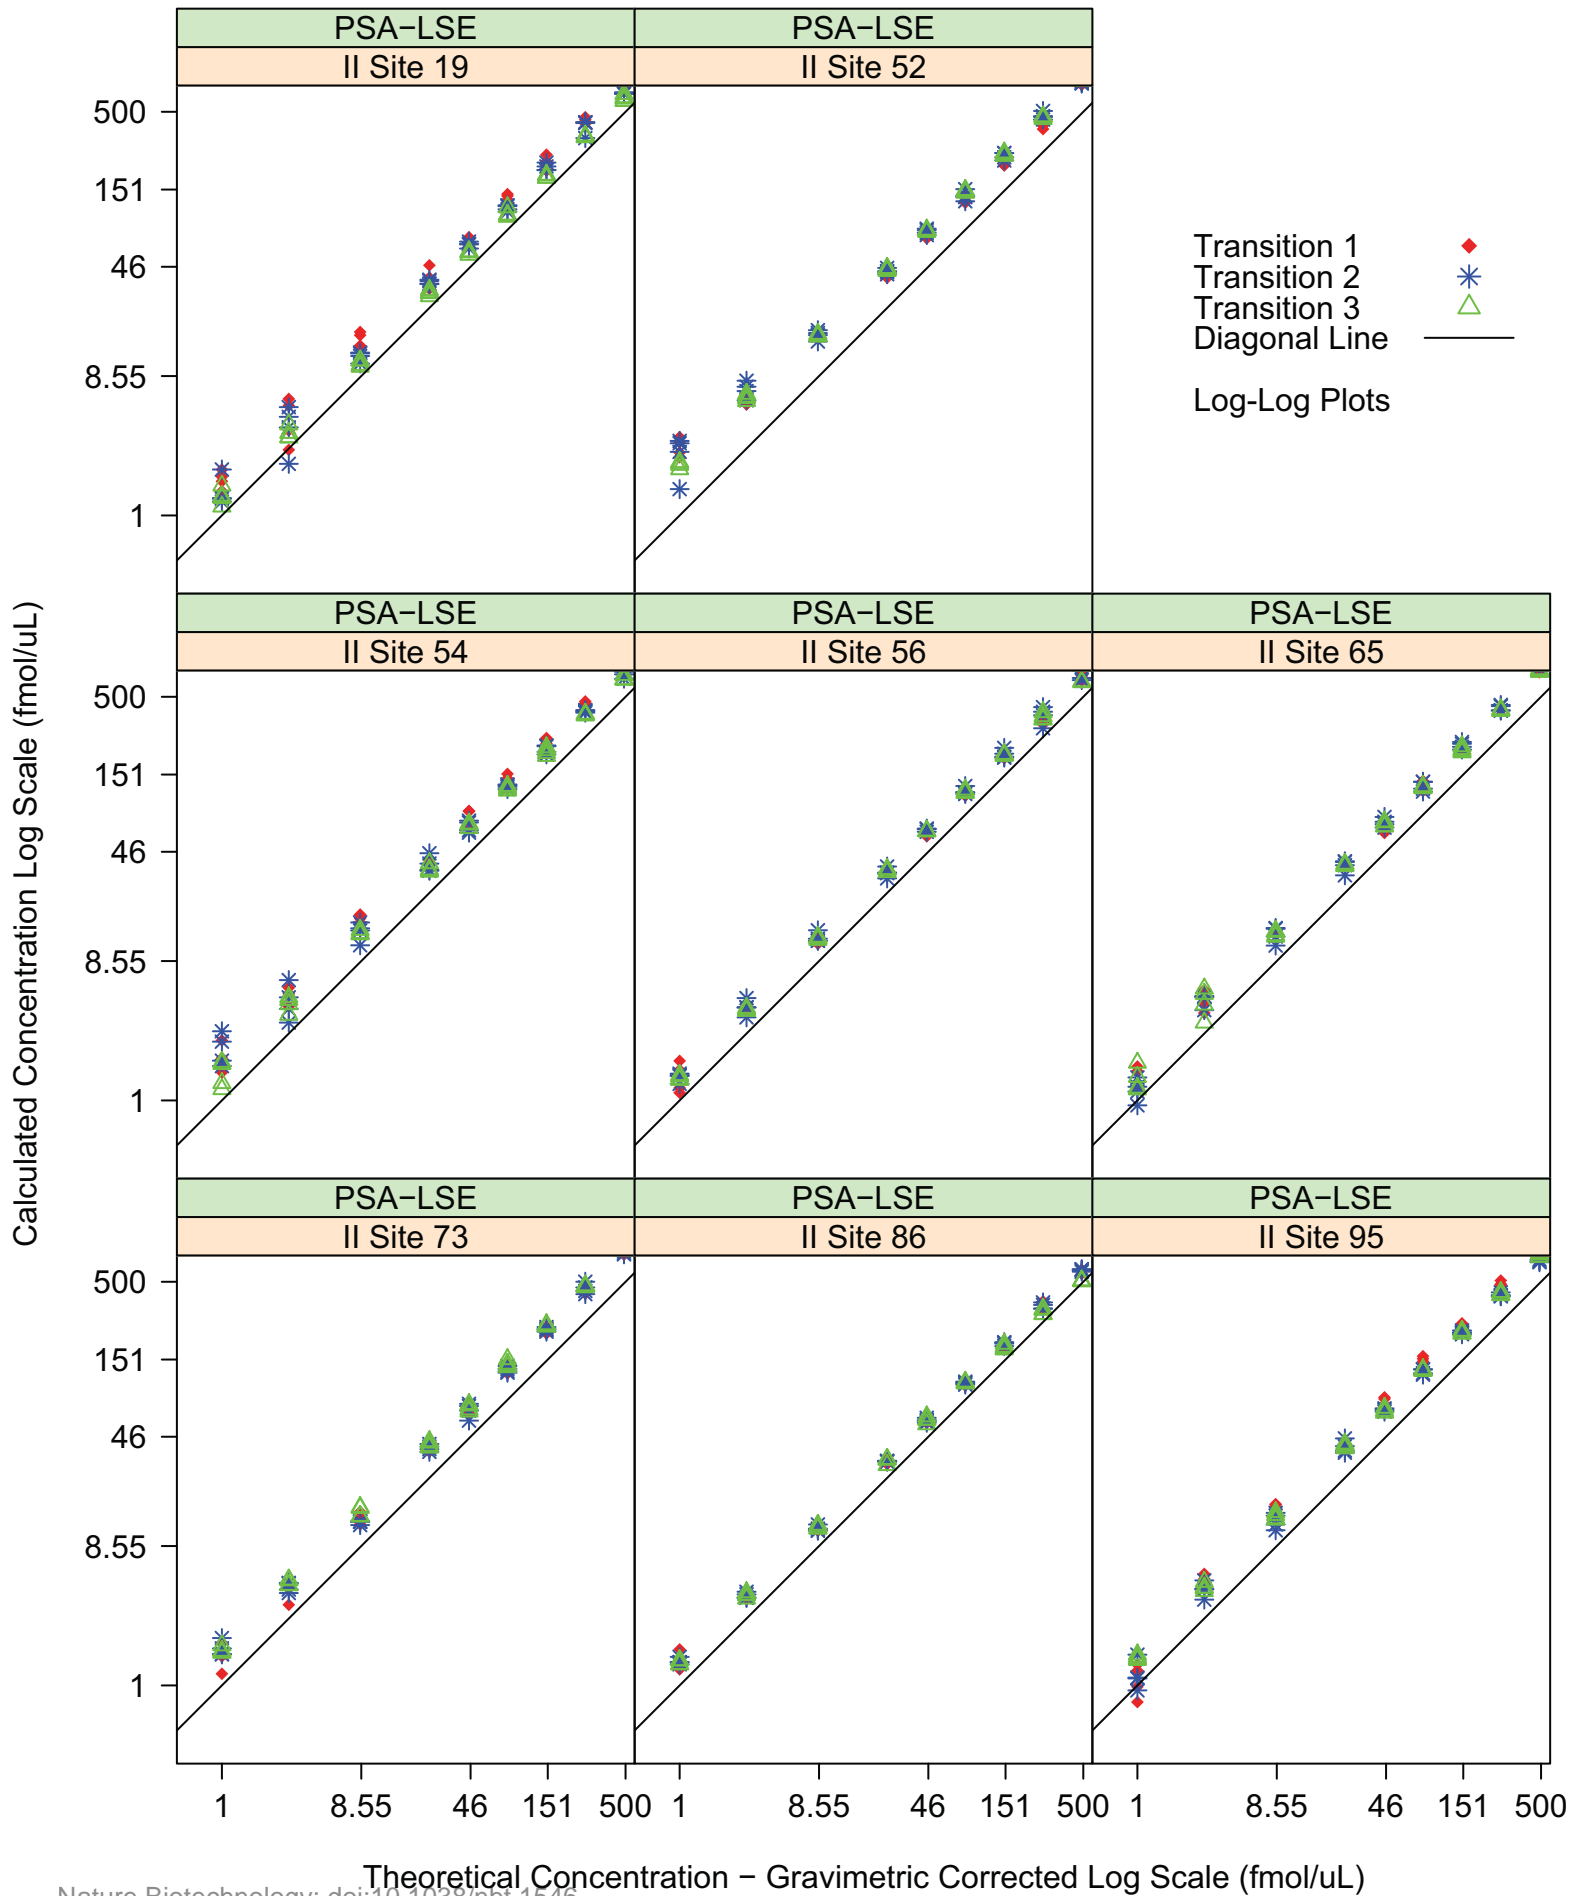

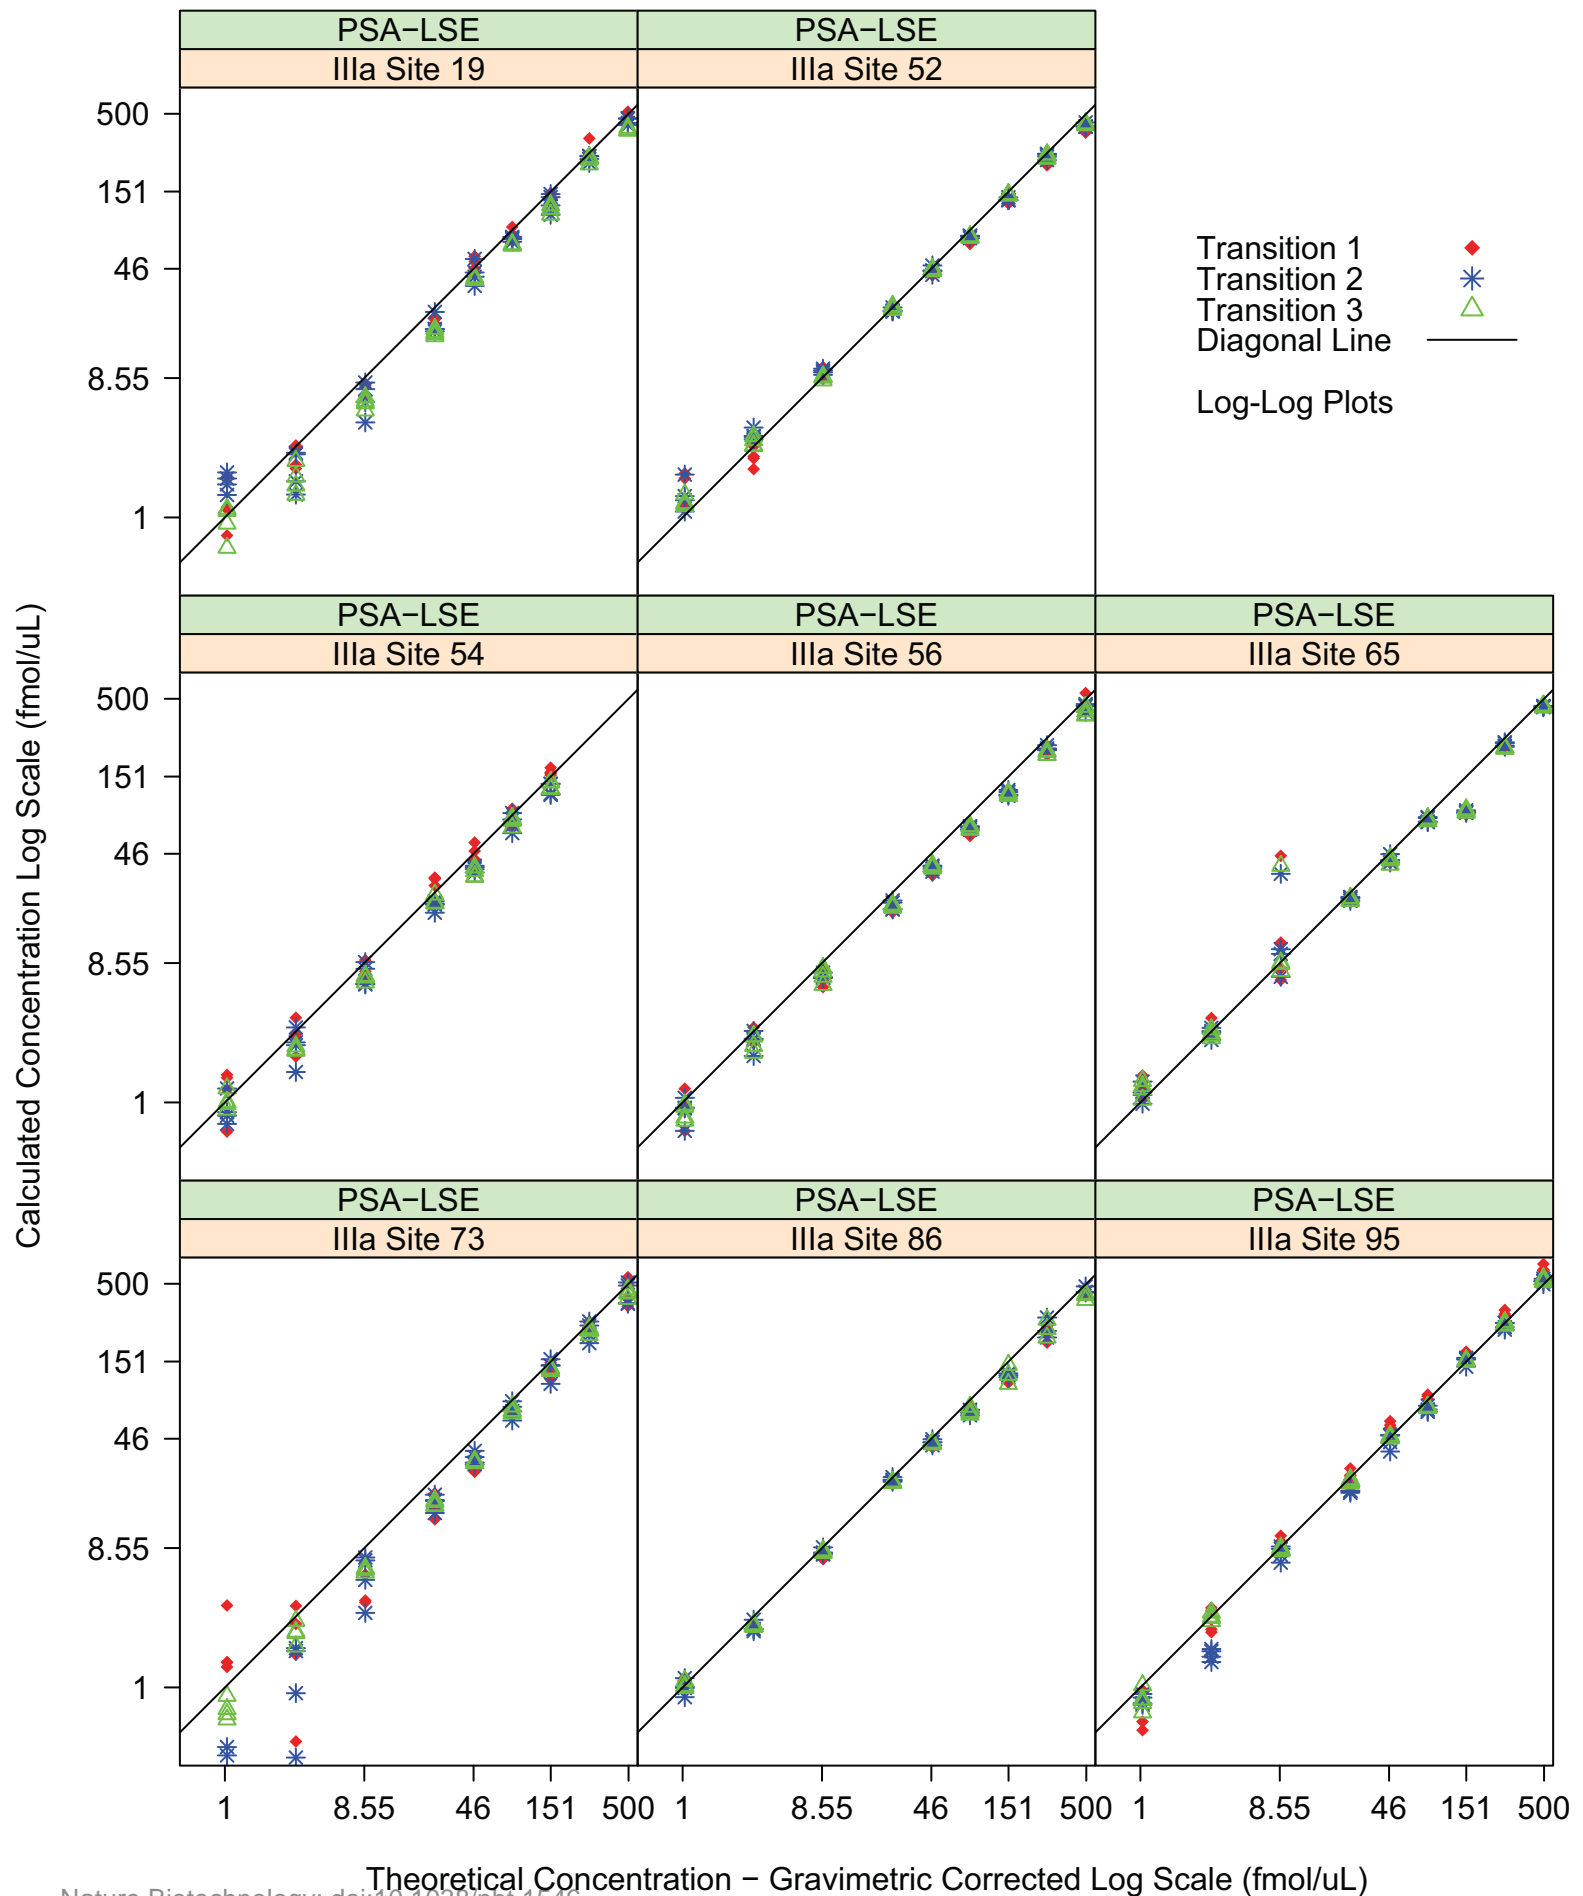

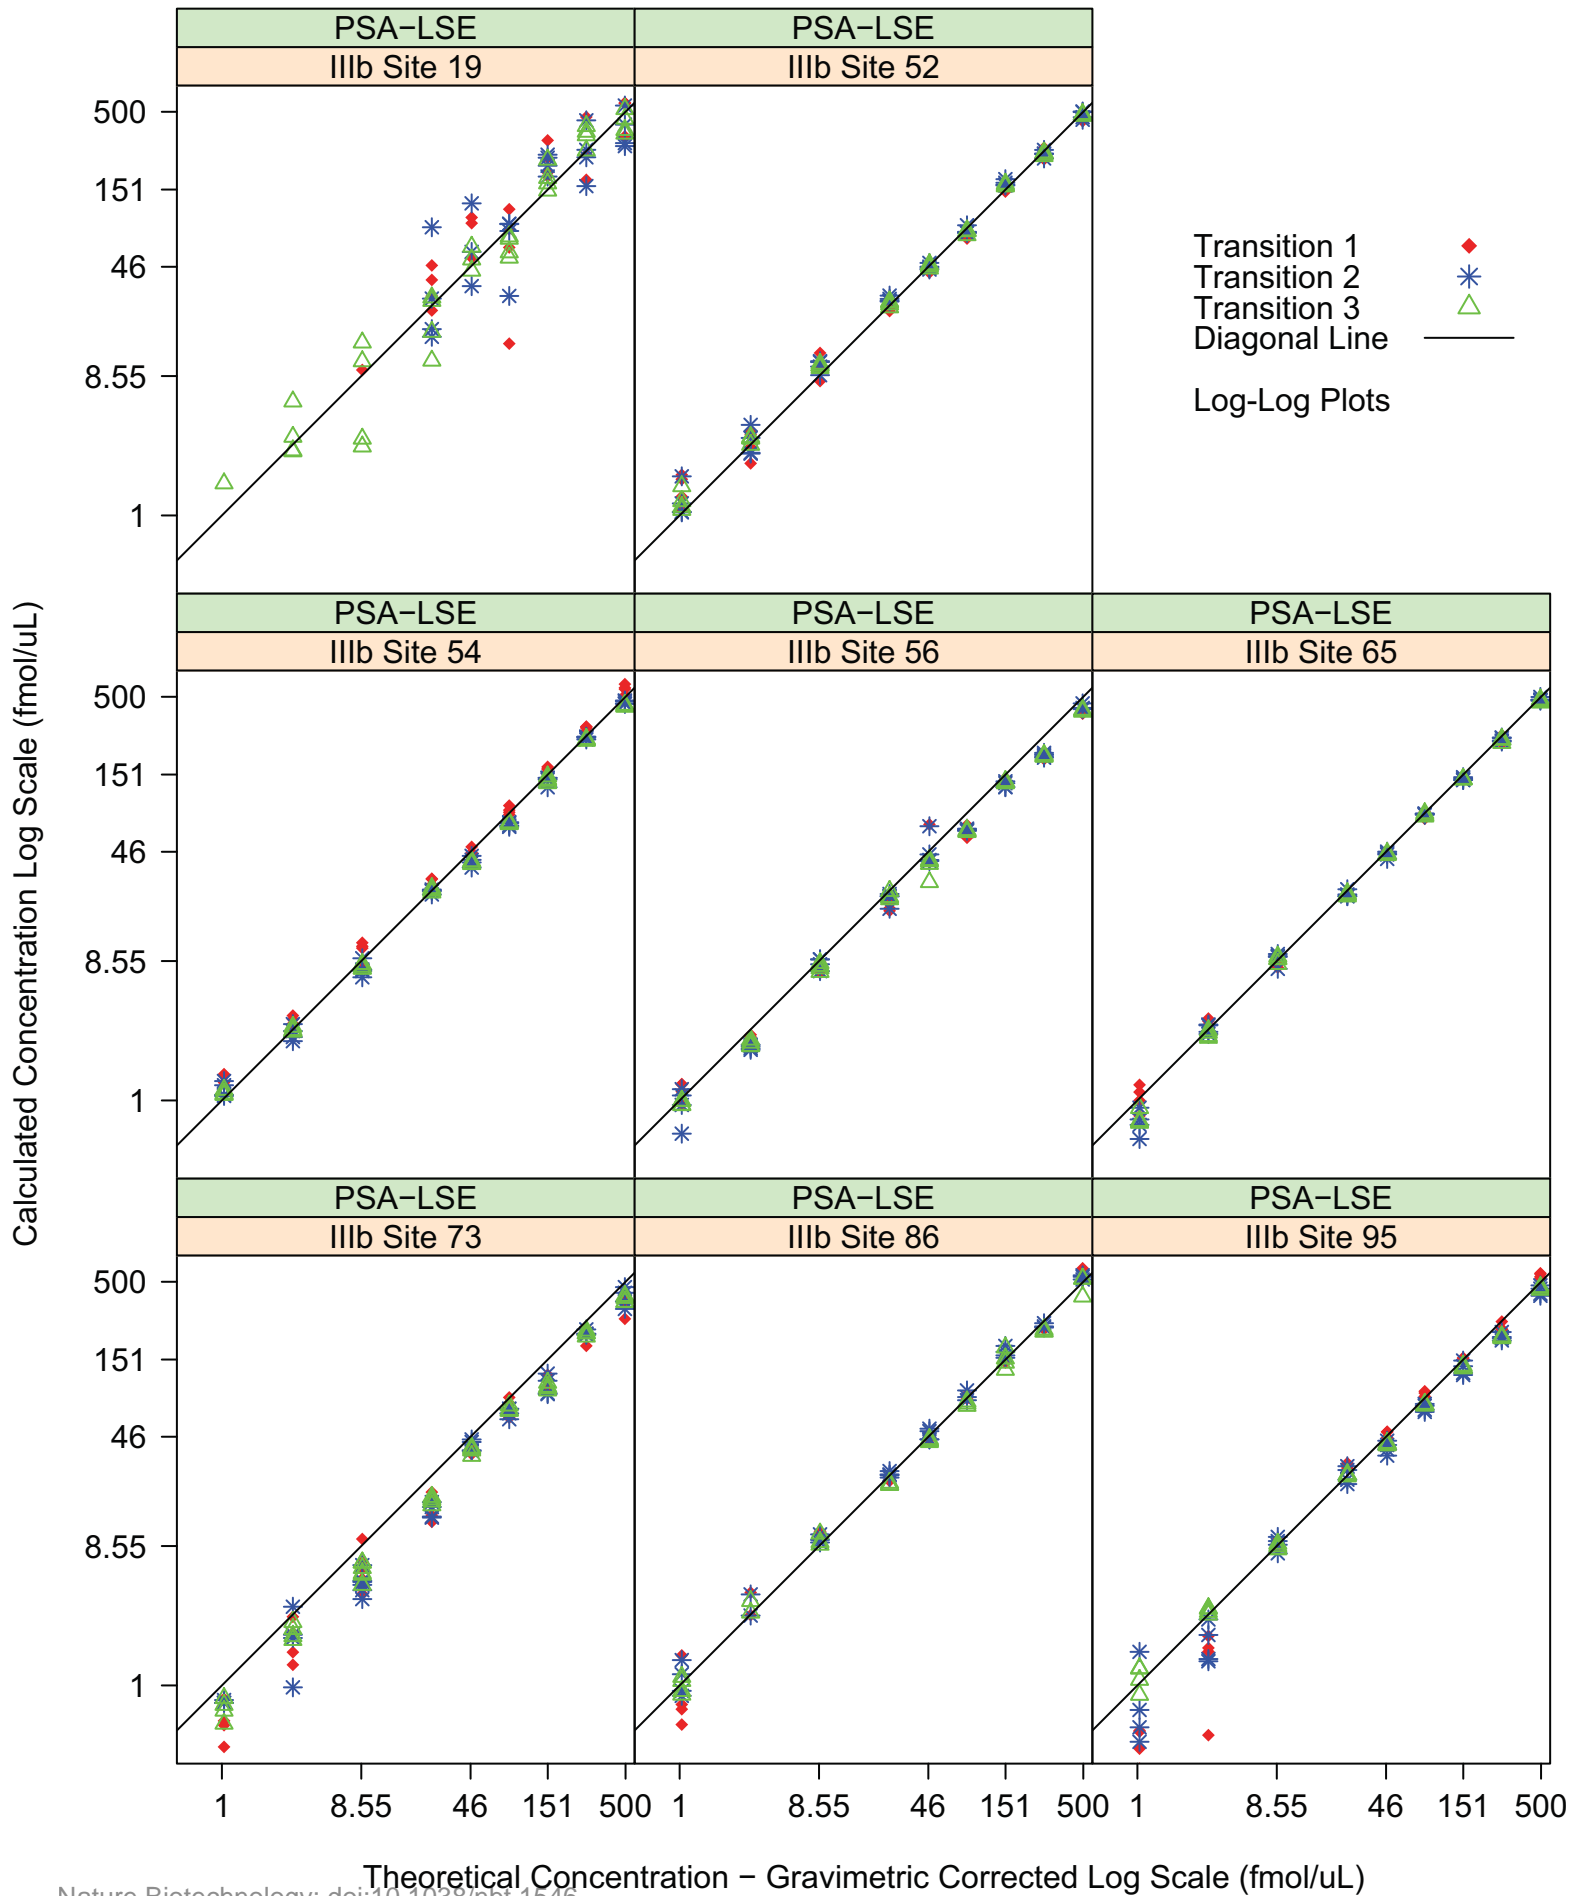

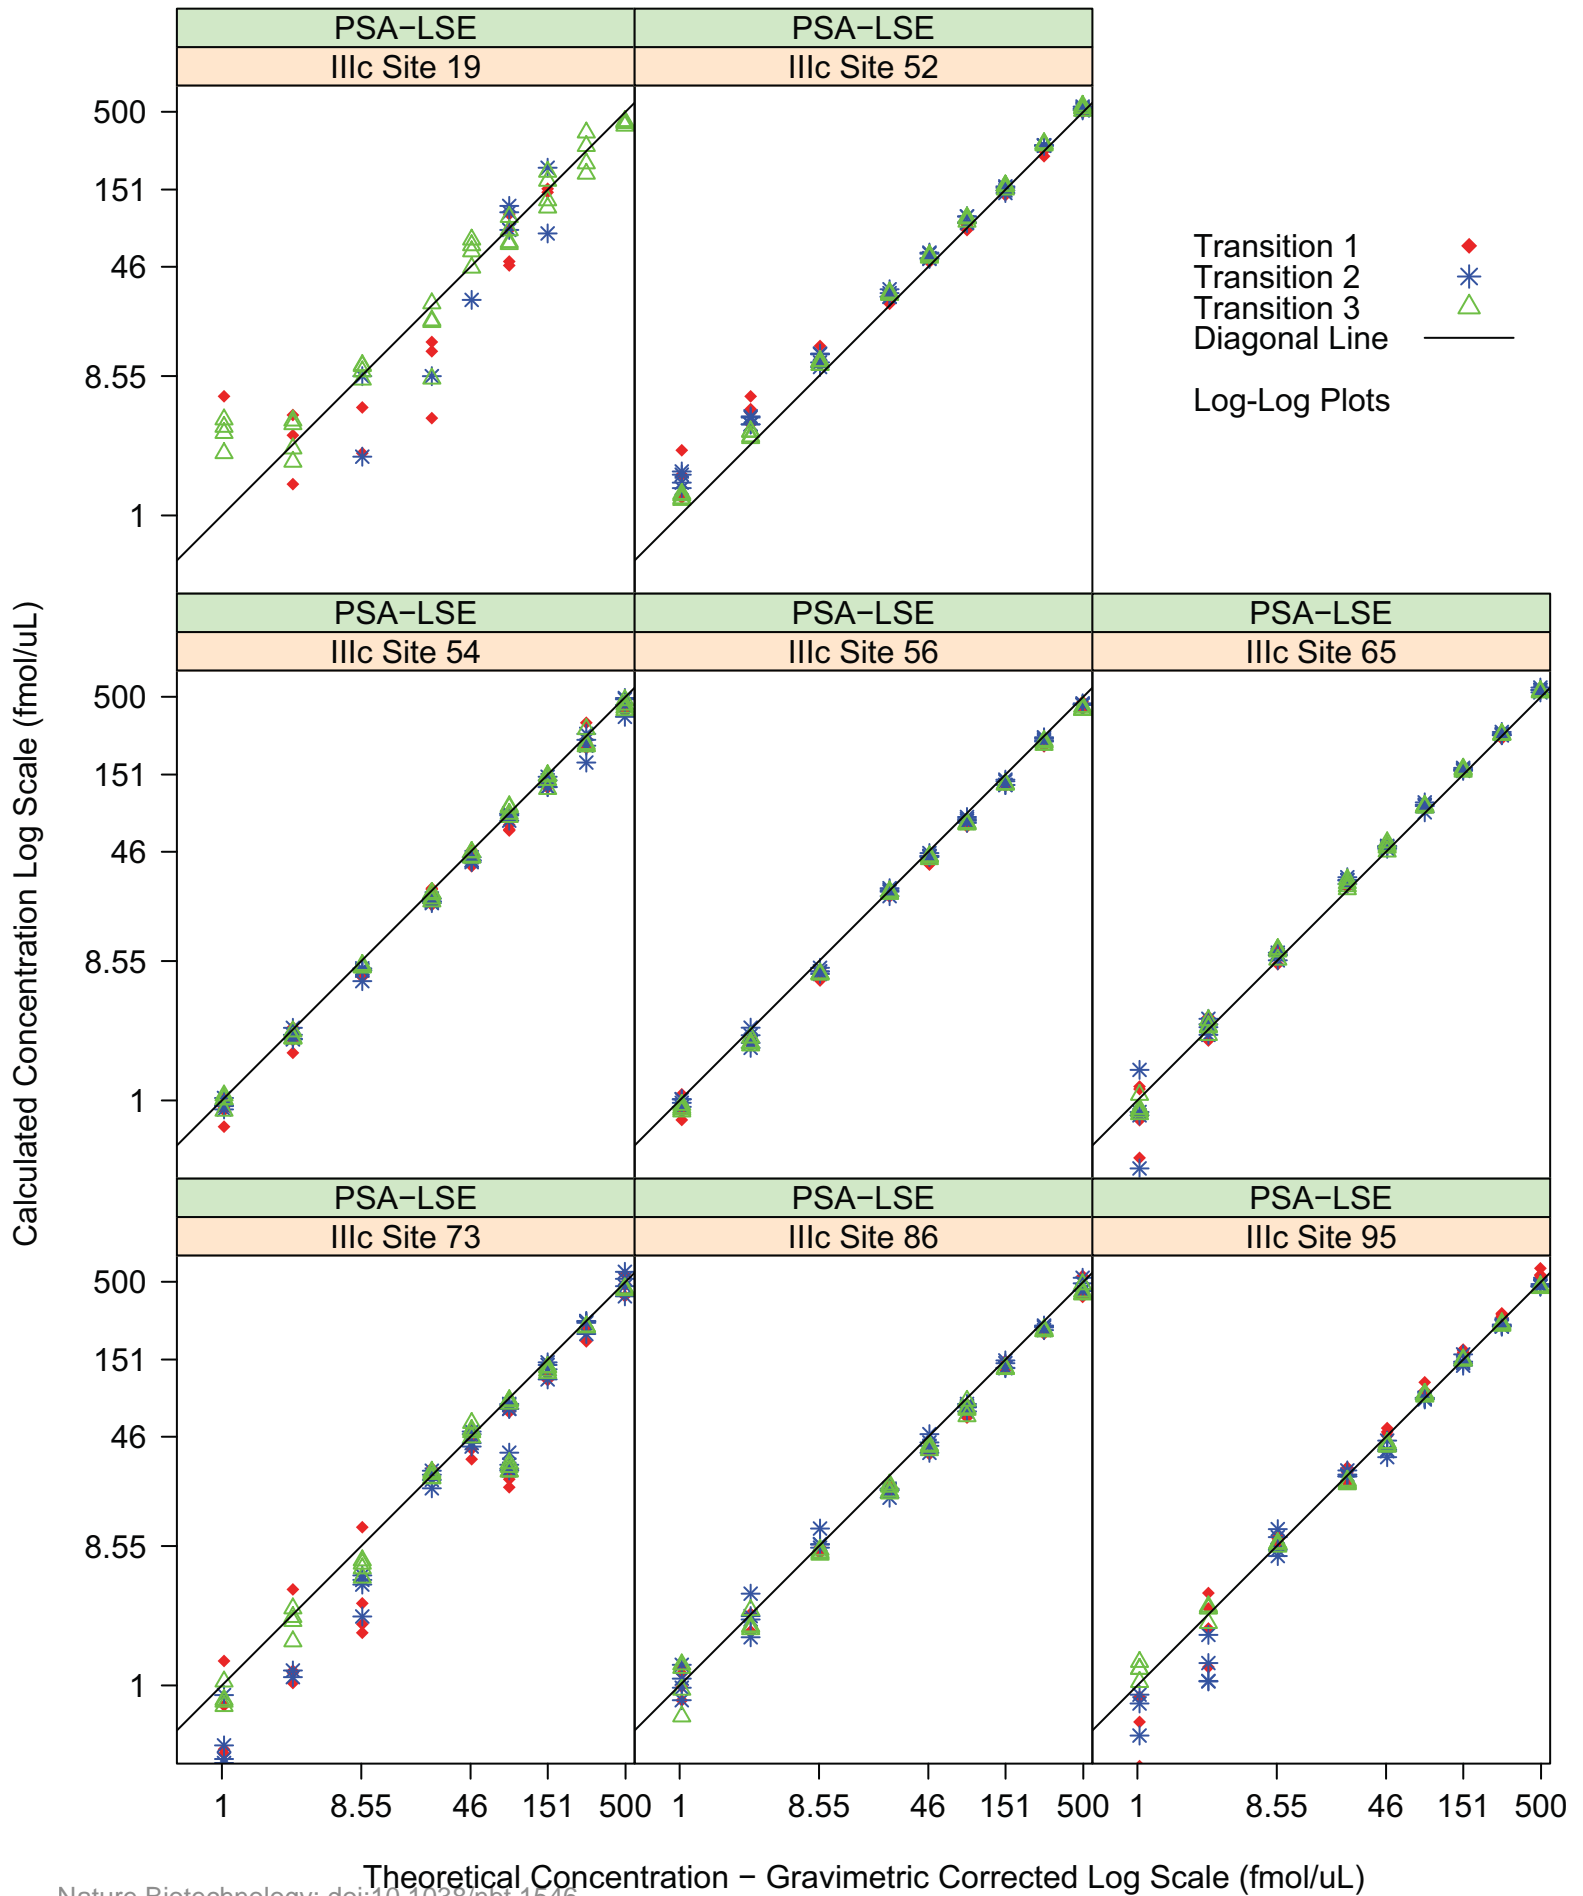

Supplement: NIHMS189102-supplement-Supplementary_Materials.pdf [file NIHMS189102-supplement-Supplementary_Materials.pdf]
